# Supplementary material for: Extensive expansion of the chemical diversity of fusidane-type antibiotics using a stochastic combinational strategy
Source: PubMed Central journal article supplement — Acta Pharm Sin B. 2020 Dec 15;11(6):1676–85. doi: 10.1016/j.apsb.2020.12.007 (PMC8245791; doi:10.1016/j.apsb.2020.12.007), 2020-12-15
Supplement: mmc1.pdf [file mmc1.pdf]

## Supporting Information for

### Original article

## Extensive expanding the chemical diversity of fusidane-type antibiotics using a stochastic combinational strategy

Xiaojun Song<sup>a,†</sup>, Jianming Lv<sup>b,†</sup>, Zhiqin Cao<sup>b</sup>, Huiyun Huang<sup>b</sup>, Guodong Chen<sup>b</sup>, Takayoshi Awakawa<sup>c</sup>, Dan Hu<sup>b,\*</sup>, Hao Gao<sup>a,b,\*</sup>, Ikuro Abe<sup>c,\*</sup>, Xinsheng Yao<sup>a,b,\*</sup>

<sup>a</sup>*College of Traditional Chinese Materia Medica, Shenyang Pharmaceutical University, Shenyang 110016, China*

<sup>b</sup>*Institute of Traditional Chinese Medicine and Natural Products, College of Pharmacy/Guangdong Province Key Laboratory of Pharmacodynamic Constituents of TCM and New Drugs Research, Jinan University, Guangzhou 510632, China*

<sup>c</sup>*Graduate School of Pharmaceutical Sciences, The University of Tokyo, Tokyo 113-0033, Japan*

<sup>†</sup>These authors made equal contributions to this work.

\*Corresponding authors. Tel./fax: +86 20 8522 1559.

E-mail addresses: tyaoxs@jnu.edu.cn (Xinsheng Yao), abei@mol.f.u-tokyo.ac.jp (Ikuro Abe), tghao@jnu.edu.cn (Hao Gao), thudan@jnu.edu.cn (Dan Hu).

Received 23 September 2020; received in revised form 11 November 2020; accepted 4 December 2020

## Table of contents

|                                                                                                    |    |
|----------------------------------------------------------------------------------------------------|----|
| <b>Supporting Methods</b> .....                                                                    | 6  |
| <b>Supporting Figures</b> .....                                                                    | 21 |
| Figure S1 HPLC analysis of metabolites from <i>A. oryzae</i> transformants.....                    | 21 |
| Figure S2 Fusidane-type antibiotics produced <i>via</i> the stochastic combinational strategy..... | 24 |
| Figure S3 HRESIMS and NMR spectra of <b>5</b> . .....                                              | 27 |
| Figure S4 HRESIMS and NMR spectra of <b>6</b> . .....                                              | 31 |
| Figure S5 HRESIMS and NMR spectra of <b>9</b> . .....                                              | 34 |
| Figure S6 HRESIMS and NMR spectra of <b>10</b> . .....                                             | 37 |
| Figure S7 HRESIMS and NMR spectra of <b>11</b> .....                                               | 40 |
| Figure S8 HRESIMS and NMR spectra of <b>12</b> . .....                                             | 43 |
| Figure S9 HRESIMS and NMR spectra of <b>13</b> . .....                                             | 46 |
| Figure S10 HRESIMS and NMR spectra of <b>14</b> . .....                                            | 49 |
| Figure S11 HRESIMS and NMR spectra of <b>15</b> . .....                                            | 52 |
| Figure S12 HRESIMS and NMR spectra of <b>17</b> . .....                                            | 55 |
| Figure S13 HRESIMS and NMR spectra of <b>18</b> . .....                                            | 58 |

|                                                       |     |
|-------------------------------------------------------|-----|
| Figure S14 HRESIMS and NMR spectra of <b>19</b> ..... | 61  |
| Figure S15 HRESIMS and NMR spectra of <b>20</b> ..... | 64  |
| Figure S16 HRESIMS and NMR spectra of <b>21</b> ..... | 67  |
| Figure S17 HRESIMS and NMR spectra of <b>22</b> ..... | 70  |
| Figure S18 HRESIMS and NMR spectra of <b>23</b> ..... | 73  |
| Figure S19 HRESIMS and NMR spectra of <b>24</b> ..... | 76  |
| Figure S20 HRESIMS and NMR spectra of <b>25</b> ..... | 79  |
| Figure S21 HRESIMS and NMR spectra of <b>26</b> ..... | 82  |
| Figure S22 HRESIMS and NMR spectra of <b>29</b> ..... | 85  |
| Figure S23 HRESIMS and NMR spectra of <b>30</b> ..... | 88  |
| Figure S24 HRESIMS and NMR spectra of <b>31</b> ..... | 91  |
| Figure S25 HRESIMS and NMR spectra of <b>32</b> ..... | 94  |
| Figure S26 HRESIMS and NMR spectra of <b>33</b> ..... | 97  |
| Figure S27 HRESIMS and NMR spectra of <b>34</b> ..... | 100 |
| Figure S28 HRESIMS and NMR spectra of <b>35</b> ..... | 103 |
| Figure S29 HRESIMS and NMR spectra of <b>36</b> ..... | 106 |
| Figure S30 HRESIMS and NMR spectra of <b>37</b> ..... | 109 |
| Figure S31 HRESIMS and NMR spectra of <b>38</b> ..... | 112 |
| Figure S32 HRESIMS and NMR spectra of <b>39</b> ..... | 115 |
| Figure S33 HRESIMS and NMR spectra of <b>40</b> ..... | 118 |
| Figure S34 HRESIMS and NMR spectra of <b>41</b> ..... | 121 |
| Figure S35 HRESIMS and NMR spectra of <b>42</b> ..... | 124 |
| Figure S36 HRESIMS and NMR spectra of <b>43</b> ..... | 127 |
| Figure S37 HRESIMS and NMR spectra of <b>44</b> ..... | 130 |
| Figure S38 HRESIMS and NMR spectra of <b>45</b> ..... | 133 |
| Figure S39 HRESIMS and NMR spectra of <b>46</b> ..... | 136 |
| Figure S40 HRESIMS and NMR spectra of <b>47</b> ..... | 139 |
| Figure S41 HRESIMS and NMR spectra of <b>48</b> ..... | 142 |
| Figure S42 HRESIMS and NMR spectra of <b>49</b> ..... | 145 |
| Figure S43 HRESIMS and NMR spectra of <b>50</b> ..... | 148 |
| Figure S44 HRESIMS and NMR spectra of <b>51</b> ..... | 151 |
| Figure S45 HRESIMS and NMR spectra of <b>52</b> ..... | 154 |
| Figure S46 HRESIMS and NMR spectra of <b>55</b> ..... | 157 |
| Figure S47 HRESIMS and NMR spectra of <b>56</b> ..... | 160 |
| Figure S48 HRESIMS and NMR spectra of <b>57</b> ..... | 163 |
| Figure S49 HRESIMS and NMR spectra of <b>58</b> ..... | 166 |
| Figure S50 HRESIMS and NMR spectra of <b>59</b> ..... | 169 |
| Figure S51 HRESIMS and NMR spectra of <b>60</b> ..... | 172 |
| Figure S52 HRESIMS and NMR spectra of <b>61</b> ..... | 175 |
| Figure S53 HRESIMS and NMR spectra of <b>62</b> ..... | 178 |
| Figure S54 HRESIMS and NMR spectra of <b>63</b> ..... | 182 |
| Figure S55 HRESIMS and NMR spectra of <b>64</b> ..... | 185 |
| Figure S56 HRESIMS and NMR spectra of <b>65</b> ..... | 188 |
| Figure S57 HRESIMS and NMR spectra of <b>66</b> ..... | 191 |

|                                                                                                                                                          |     |
|----------------------------------------------------------------------------------------------------------------------------------------------------------|-----|
| Figure S58 HRESIMS and NMR spectra of <b>67</b> .                                                                                                        | 194 |
| Figure S59 HRESIMS and NMR spectra of <b>68</b> .                                                                                                        | 197 |
| Figure S60 HRESIMS and NMR spectra of <b>69</b> .                                                                                                        | 200 |
| Figure S61 HRESIMS and NMR spectra of <b>81</b> .                                                                                                        | 203 |
| Figure S62 Linear correlation between calculated <sup>13</sup> C NMR chemical shift values of <b>34-A/34-B</b> and experimental values of <b>34</b> .    | 204 |
| Figure S63 Linear correlation between calculated <sup>13</sup> C NMR chemical shift values of <b>35-A/35-B</b> and experimental values of <b>35</b> .    | 205 |
| Figure S64 Linear correlation between calculated <sup>13</sup> C NMR chemical shift values of <b>38-A/38-B</b> and experimental values of <b>38</b> .    | 206 |
| Figure S65 Linear correlation between calculated <sup>13</sup> C NMR chemical shift values of <b>42-A/42-B</b> and experimental values of <b>42</b> .    | 207 |
| Figure S66 HPLC analysis for spontaneous 1,4-addition of <b>37</b> in Tri-HCl buffer.                                                                    | 208 |
| Figure S67 Previously isolated fusidane-type antibiotics during the biosynthetic study of helvolic acid, fusidic acid and cephalosporin P <sub>1</sub> . | 209 |
| Figure S68 Comparison of anti- <i>S. aureus</i> 209P activity of fusidane-type antibiotics featured with 3-keto and 3 $\beta$ -OH.                       | 210 |
| Figure S69 Comparison of anti- <i>S. aureus</i> 209P activity of fusidane-type antibiotics featured with 3-keto and 3 $\alpha$ -OH.                      | 211 |
| Figure S70 The effect of the C1/C2 double bond on anti- <i>S. aureus</i> 209P activity.                                                                  | 212 |
| Figure S71 The detrimental effect of mono-oxidation at C6 or C7 on anti- <i>S. aureus</i> 209P activity.                                                 | 213 |
| Figure S72 The effect of dual-oxidation at C6 and C7 on anti- <i>S. aureus</i> 209P activity.                                                            | 214 |
| Figure S73 The effect of C11 $\alpha$ -hydroxylation on anti- <i>S. aureus</i> 209P activity.                                                            | 215 |
| Figure S74 The effect of acetylation of 6-OH on anti- <i>S. aureus</i> 209P activity.                                                                    | 216 |
| Figure S75 C1 $\alpha$ -hydroxylation has the negative effect on anti- <i>S. aureus</i> 209P activity.                                                   | 217 |
| Figure S76 Analysis of the impurity peak in the feeding experiment using CO6 as the host.                                                                | 218 |
| <b>Supporting Tables</b>                                                                                                                                 | 219 |
| Table S1 Eight post-tailoring genes from <i>hel</i> , <i>fus</i> and <i>cep</i> clusters.                                                                | 219 |
| Table S2 All gene combinations and the obtained products.                                                                                                | 220 |
| Table S3 NMR data for <b>5</b> ( <sup>1</sup> H for 400 MHz and <sup>13</sup> C for 100 MHz in CDCl <sub>3</sub> ).                                      | 221 |
| Table S4 NMR data for <b>6</b> ( <sup>1</sup> H for 600 MHz and <sup>13</sup> C for 150 MHz in CDCl <sub>3</sub> ).                                      | 222 |
| Table S5 NMR data for <b>9</b> ( <sup>1</sup> H for 600 MHz and <sup>13</sup> C for 150 MHz in CDCl <sub>3</sub> ).                                      | 223 |
| Table S6 NMR data for <b>10</b> ( <sup>1</sup> H for 600 MHz and <sup>13</sup> C for 150 MHz in CDCl <sub>3</sub> ).                                     | 224 |
| Table S7 NMR data for <b>11</b> ( <sup>1</sup> H for 400 MHz and <sup>13</sup> C for 100 MHz in CDCl <sub>3</sub> ).                                     | 225 |
| Table S8 NMR data for <b>12</b> ( <sup>1</sup> H for 400 MHz and <sup>13</sup> C for 100 MHz in CDCl <sub>3</sub> ).                                     | 226 |
| Table S9 NMR data for <b>13</b> ( <sup>1</sup> H for 600 MHz and <sup>13</sup> C for 150 MHz in CDCl <sub>3</sub> ).                                     | 227 |
| Table S10 NMR data for <b>14</b> ( <sup>1</sup> H for 400 MHz and <sup>13</sup> C for 100 MHz in CDCl <sub>3</sub> ).                                    | 228 |
| Table S11 NMR data for <b>15</b> ( <sup>1</sup> H for 400 MHz and <sup>13</sup> C for 100 MHz in CDCl <sub>3</sub> ).                                    | 229 |
| Table S12 NMR data for <b>17</b> ( <sup>1</sup> H for 600 MHz and <sup>13</sup> C for 150 MHz in CDCl <sub>3</sub> ).                                    | 230 |
| Table S13 NMR data for <b>18</b> ( <sup>1</sup> H for 600 MHz and <sup>13</sup> C for 150 MHz in CD <sub>3</sub> OD).                                    | 231 |
| Table S14 NMR data for <b>19</b> ( <sup>1</sup> H for 600 MHz and <sup>13</sup> C for 150 MHz in CD <sub>3</sub> OD).                                    | 232 |
| Table S15 NMR data for <b>20</b> ( <sup>1</sup> H for 600 MHz and <sup>13</sup> C for 150 MHz in CD <sub>3</sub> OD).                                    | 233 |



|                                                                                                                                                                                                                   |     |
|-------------------------------------------------------------------------------------------------------------------------------------------------------------------------------------------------------------------|-----|
| Table S60 NMR data for <b>69</b> ( <sup>1</sup> H for 600 MHz and <sup>13</sup> C for 150 MHz in CD <sub>3</sub> OD). .....                                                                                       | 278 |
| Table S61 NMR data for <b>81</b> ( <sup>1</sup> H for 600 MHz and <sup>13</sup> C for 150 MHz in CDCl <sub>3</sub> ). .....                                                                                       | 279 |
| Table S62 The Boltzmann distribution for two possible structures ( <b>34-A</b> and <b>34-B</b> ) of <b>34</b> . ..                                                                                                | 280 |
| Table S63 The Boltzmann distribution for two possible structures ( <b>35-A</b> and <b>35-B</b> ) of <b>35</b> . ..                                                                                                | 280 |
| Table S64 The Boltzmann distribution for two possible structures ( <b>38-A</b> and <b>38-B</b> ) of <b>38</b> . ..                                                                                                | 281 |
| Table S65 The Boltzmann distribution for two possible structures ( <b>42-A</b> and <b>42-B</b> ) of <b>42</b> . ..                                                                                                | 281 |
| Table S66 Comparison of the chemical shifts of compounds <b>38</b> and <b>40</b> . .....                                                                                                                          | 282 |
| Table S67 R square (R <sup>2</sup> ) of the linear correlations, mean absolute error (MAE) values and DP4+ probabilities of <b>34-A/34-B</b> and <b>42-A/42-B</b> of <b>34</b> and <b>42</b> , respectively. .... | 283 |
| Table S68 R square (R <sup>2</sup> ) of the linear correlations, mean absolute error (MAE) values and DP4+ probabilities of <b>35-A/35-B</b> and <b>38-A/38-B</b> of <b>35</b> and <b>38</b> , respectively. .... | 284 |
| Table S69 Comparison of the coupling constants of compounds containing C1–C2 double bond and C3-hydroxyl group. ....                                                                                              | 285 |
| Table S71 Plasmids used in the study.....                                                                                                                                                                         | 286 |
| Table S72 Strains used in the study.....                                                                                                                                                                          | 287 |

## Supporting Methods

### *Detailed purification procedure of compounds*

#### *Purification of 5*

The culture medium extract (1.0 g) from the 5 L culture of AOS1 was subjected to ODS column chromatography on MPLC and eluted stepwise using MeOH–H<sub>2</sub>O gradient (35:65, 80:20 and 100:0, v/v). Fraction 2 was further purified by reverse-phase semi-preparative HPLC (70% CH<sub>3</sub>CN–H<sub>2</sub>O containing 0.1% formic acid, 3 mL/min) to yield **5** (43.5 mg).

#### *Purification of 6*

The culture medium extract (0.31 g) from the 2 L culture of AOS2 was subjected to ODS column chromatography on MPLC and eluted stepwise using MeOH–H<sub>2</sub>O gradient (35:65, 80:20 and 100:0, v/v). Fraction 2 was further purified by reverse-phase semi-preparative HPLC (80% CH<sub>3</sub>CN–H<sub>2</sub>O containing 0.1% formic acid, 3 mL/min) to yield **6** (4.3 mg).

#### *Purification of 9–11*

The culture medium extract (0.41 g) from the 2 L culture of AOS3 was subjected to ODS column chromatography on MPLC and eluted stepwise using MeOH–H<sub>2</sub>O gradient (35:65, 70:30 and 100:0, v/v). Fraction 2 was further purified by reverse-phase semi-preparative HPLC (90% CH<sub>3</sub>CN–H<sub>2</sub>O containing 0.1% formic acid, 3 mL/min) to yield **9** (2.1 mg), **10** (1.2 mg) and **11** (5.0 mg).

#### *Purification of 12–15*

The culture medium extract (0.6 g) from the 3.5 L culture of AOS4 was subjected to ODS column chromatography on MPLC and eluted stepwise using MeOH–H<sub>2</sub>O gradient (35:65, 60:40 and 100:0, v/v). Fraction 2 was further purified by reverse-phase semi-preparative HPLC (55% CH<sub>3</sub>CN–H<sub>2</sub>O containing 0.1% formic acid, 3 mL/min) to yield **12** (27.5 mg), **13** (3.6 mg), **14** (8.1 mg) and **15** (15.3 mg).

#### *Purification of 17–22*

The culture medium extract (1.03 g) from the 5 L culture of AOS5 was subjected to ODS column chromatography on MPLC and eluted stepwise using MeOH–H<sub>2</sub>O gradient (30:70, 60:40 and 100:0, v/v). Fraction 2 was further purified by reverse-phase semi-preparative HPLC (45% CH<sub>3</sub>CN–H<sub>2</sub>O containing 0.1% formic acid, 3 mL/min) to yield **17** (28.0 mg), **18** (17 mg), **19** (7.0 mg), **20** (98.0 mg), **21** (20.0 mg) and **22** (10.0 mg).

#### *Purification of 23–25*

The culture medium extract (0.52 g) from the 2.5 L culture of AOS6 was subjected to ODS column chromatography on MPLC and eluted stepwise using MeOH–H<sub>2</sub>O gradient (35:75, 70:30 and 100:0, v/v). Fraction 2 was further purified by reverse-phase semi-preparative

HPLC (70% CH<sub>3</sub>CN–H<sub>2</sub>O containing 0.1% formic acid, 3 mL/min) to yield **23** (47.0 mg), **24** (4.0 mg) and **25** (1.5 mg).

#### *Purification of 26*

The culture medium extract (0.8 g) from the 3 L culture of AOS7 was subjected to ODS column chromatography on MPLC and eluted stepwise using MeOH–H<sub>2</sub>O gradient (35:65, 70:30 and 100:0, v/v). Fraction 2 was further purified by reverse-phase semi-preparative HPLC (70% CH<sub>3</sub>CN–H<sub>2</sub>O containing 0.1% formic acid, 3 mL/min) to yield **26** (47.0 mg).

#### *Purification of 29*

The culture medium extract (0.55 g) from the 3 L culture of AOS8 was subjected to ODS column chromatography on MPLC and eluted stepwise using MeOH–H<sub>2</sub>O gradient (40:60, 70:30 and 100:0, v/v). Fraction 2 was further purified by reverse-phase semi-preparative HPLC (70% CH<sub>3</sub>CN–H<sub>2</sub>O containing 0.1% formic acid, 3 mL/min) to yield **29** (14.0 mg).

#### *Purification of 30–34*

The culture medium extract (0.67 g) from 4 L culture of AOS9 was subjected to ODS column chromatography on MPLC and eluted stepwise using MeOH–H<sub>2</sub>O gradient (40:60, 70:30 and 100:0, v/v). Fraction 2 was further purified by reverse-phase semi-preparative HPLC (80% MeOH–H<sub>2</sub>O containing 0.1% formic acid, 3 mL/min) to yield **30** (1.8 mg), **31** (12.0 mg), **32** (2.0 mg), **33** (5.0 mg) and **34** (6.4 mg).

#### *Purification of 35–40*

The culture medium extract (1.05 g) from the 5 L culture of AOS10 was subjected to ODS column chromatography on MPLC and eluted stepwise using MeOH–H<sub>2</sub>O gradient (40:60, 60:40, 70:30 and 100:0, v/v). Fractions 2 and 3 were further purified by reverse-phase semi-preparative HPLC (42% CH<sub>3</sub>CN–H<sub>2</sub>O containing 0.1% formic acid, 3 mL/min) to yield **35** (3.1 mg), **36** (7.7 mg), **37** (7.0 mg), **38** (3.0 mg), **39** (1.4 mg) and **40** (25.0 mg).

#### *Purification of 41–43*

The culture medium extract (0.83 g) from the 4 L culture of AOS11 was subjected to ODS column chromatography on MPLC and eluted stepwise using MeOH–H<sub>2</sub>O gradient (35:65, 50:50, 70:30 and 100:0, v/v). Fraction 3 was further purified by reverse-phase semi-preparative HPLC (60% CH<sub>3</sub>CN–H<sub>2</sub>O containing 0.1% formic acid, 3 mL/min) to yield **41** (2.0 mg), **42** (1.1 mg) and **43** (3.0 mg).

#### *Purification of 44–46*

The culture medium extract (0.93 g) from 4 L culture of AOS12 was subjected to ODS column chromatography on MPLC and eluted stepwise using MeOH–H<sub>2</sub>O gradient (35:65, 55:45, 70:30 and 100:0, v/v). Fraction 3 was further purified by reverse-phase

semi-preparative HPLC (60% CH<sub>3</sub>CN–H<sub>2</sub>O containing 0.1% formic acid, 3 mL/min) to yield **44** (3.0 mg), **45** (1.1 mg) and **46** (5.0 mg).

*Purification of 47–49*

The culture medium extract (0.82 g) from the 3.5 L culture of AOS13 was subjected to ODS column chromatography on MPLC and eluted stepwise using MeOH–H<sub>2</sub>O gradient (35:65, 70:30 and 100:0, v/v). Fraction 2 was further purified by reverse-phase semi-preparative HPLC (37% CH<sub>3</sub>CN–H<sub>2</sub>O containing 0.1% formic acid, 3 mL/min) to yield **47** (12.0 mg), **48** (38.0 mg) and **49** (11.0 mg).

*Purification of 50–52*

The culture medium extract (0.91 g) from the 5 L culture of AOS14 was subjected to ODS column chromatography on MPLC and eluted stepwise using MeOH–H<sub>2</sub>O gradient (45:55, 55:45, 65:35, 75:25 and 100:0, v/v). Fractions 3 and 4 were further purified by reverse-phase semi-preparative HPLC (42% CH<sub>3</sub>CN–H<sub>2</sub>O containing 0.1% formic acid, 3 mL/min) to yield **50** (6.3 mg), **51** (10.4 mg) and **52** (3.5 mg).

*Purification of 55–57*

The culture medium extract (0.88 g) from the 5 L culture of AOS15 was subjected to ODS column chromatography on MPLC and eluted stepwise using MeOH–H<sub>2</sub>O gradient (40:60, 60:40, 70:30 and 100:0, v/v). Fraction 3 was further purified by reverse-phase semi-preparative HPLC (40% CH<sub>3</sub>CN–H<sub>2</sub>O containing 0.1% formic acid, 3 mL/min) to yield **55** (15.3 mg), **56** (13.0 mg) and **57** (6.3 mg).

*Purification of 58 and 59*

The culture medium extract (0.83 g) from the 5 L culture of AOS16 was subjected to ODS column chromatography on MPLC and eluted stepwise using MeOH–H<sub>2</sub>O gradient (50:50, 60:40, 70:30 and 100:0, v/v). Fractions 2 and 3 were further purified by reverse-phase semi-preparative HPLC (50% CH<sub>3</sub>CN–H<sub>2</sub>O containing 0.1% formic acid, 3 mL/min) to yield **58** (33.5 mg) and **59** (7.5 mg).

*Purification of 60*

The culture medium extract (1.0 g) from the 5 L culture of AOS17 was subjected to ODS column chromatography on MPLC and eluted stepwise using MeOH–H<sub>2</sub>O gradient (50:50, 70:30 and 100:0, v/v). Fraction 2 was further purified by reverse-phase semi-preparative HPLC (60% CH<sub>3</sub>CN–H<sub>2</sub>O containing 0.1% formic acid, 3 mL/min) to yield **60** (80.0 mg).

*Purification of 61*

The culture medium extract (1.1 g) from the 5 L culture of AOS18 was subjected to ODS column chromatography on MPLC and eluted stepwise using MeOH–H<sub>2</sub>O gradient (35:65,



50:50, 70:30 and 100:0, v/v). Fraction 3 was further purified by reverse-phase semi-preparative HPLC (75% CH<sub>3</sub>CN–H<sub>2</sub>O containing 0.1% formic acid, 3 mL/min) to yield **61** (35.0 mg).

#### *Purification of 37, 38 and 62*

The culture medium extract (1.04 g) from the 4 L culture of AOS19 was subjected to ODS column chromatography on MPLC and eluted stepwise using MeOH–H<sub>2</sub>O gradient (35:65, 50:50, 60:40, 70:30 and 100:0, v/v). Fraction 3 was further purified by reverse-phase semi-preparative HPLC (40% CH<sub>3</sub>CN–H<sub>2</sub>O containing 0.1% formic acid, 3 mL/min) to yield **37** (7.0 mg), **38** (3.0 mg) and **62** (1.2 mg).

#### *Purification of 63*

The culture medium extract (1.04 g) from the 4 L culture of AOS20 was subjected to ODS column chromatography on MPLC and eluted stepwise using MeOH–H<sub>2</sub>O gradient (50:50, 60:40, 70:30, 80:20 and 100:0, v/v). Fraction 4 was further purified by reverse-phase semi-preparative HPLC (60% CH<sub>3</sub>CN–H<sub>2</sub>O containing 0.1% formic acid, 3 mL/min) to yield **63** (6.0 mg).

#### *Purification of 64–66*

The culture medium extract (1.2 g) from the 10 L culture of AOS23 was subjected to ODS column chromatography on MPLC and eluted stepwise using MeOH–H<sub>2</sub>O gradient (50:50, 60:40, 70:30 and 100:0, v/v). Fraction 3 was further purified by reverse-phase semi-preparative HPLC (60% CH<sub>3</sub>CN–H<sub>2</sub>O containing 0.1% formic acid, 3 mL/min) to yield **64** (3.4 mg), **65** (3.8 mg) and **66** (10.0 mg).

#### *Purification of 67*

The culture medium extract (0.89 g) from the 5 L culture of AOS24 was subjected to ODS column chromatography on MPLC and eluted stepwise using MeOH–H<sub>2</sub>O gradient (50:50, 70:30 and 100:0, v/v). Fraction 2 was further purified by reverse-phase semi-preparative HPLC (45% CH<sub>3</sub>CN–H<sub>2</sub>O containing 0.1% formic acid, 3 mL/min) to yield **67** (10.0 mg).

#### *Purification of 68 and 69*

The culture medium extract (1.03 g) from 5 L culture of AOS26 was subjected to MPLC on ODS column chromatography and eluted stepwise using MeOH–H<sub>2</sub>O gradient (50:50, 70:30 and 100:0, v/v). Fraction 2 was further purified by reverse-phase semi-preparative HPLC (45% CH<sub>3</sub>CN–H<sub>2</sub>O containing 0.1% formic acid, 3 mL/min) to yield **68** (10.0 mg) and **69** (1.2 mg).

#### *Structural characterization*

Compound **5**: white powder;  $[\alpha]_D^{27} +7.80$  (*c* 5.67, CH<sub>3</sub>OH); UV (CH<sub>3</sub>OH)  $\lambda_{\max}$  (log  $\epsilon$ ) 206 nm (4.09); IR (KBr)  $\nu_{\max}$  3437, 2971, 2949, 2871, 1716, 1666, 1440, 1374, 1254, 1019 cm<sup>-1</sup>;

HRESIMS (positive)  $m/z$  513.3212  $[M + H]^+$  (Calcd. for  $C_{31}H_{45}O_6$ , 513.3216), see Fig. S3A; NMR spectra, see Fig. S3B–H; NMR data, see Table S3; **5** is identified as 16 $\beta$ -acetyloxy-11 $\alpha$ -hydroxy-29-norprotosta-1,17(20)*Z*,24-trien-3-one-21-oic acid.

Compound **6**: white powder;  $[\alpha]_D^{22} +54.9$  ( $c$  0.59,  $CH_3OH$ ); UV ( $CH_3OH$ )  $\lambda_{max}$  ( $\log \epsilon$ ) 204 nm (3.78); IR (KBr)  $\nu_{max}$  3370, 3026, 2970, 2923, 2866, 1711, 1453, 1379, 1265, 1106  $cm^{-1}$ . HRESIMS (positive)  $m/z$  439.3209  $[M + H - CH_3COOH]^+$  (Calcd. for  $C_{29}H_{43}O_3$ , 439.3212), see Fig. S4A; NMR spectra, see Fig. S4B–H; NMR data, see Table S4; **6** is identified as 16 $\beta$ -acetyloxy-3 $\alpha$ -hydroxy-29-norprotosta-1,17(20)*Z*,24-trien-21-oic acid.

Compound **9**: white powder,  $[\alpha]_D^{26} +56.3$  ( $c$  0.77,  $CH_2Cl_2$ ); UV ( $CH_3OH$ )  $\lambda_{max}$  ( $\log \epsilon$ ) 205 nm (4.32); IR (KBr)  $\nu_{max}$  3503, 2955, 2921, 2852, 1716, 1672, 1554, 1542, 1456, 1374, 1252, 1030  $cm^{-1}$ ; HRESIMS (positive)  $m/z$  551.2975  $[M + Na]^+$  (Calcd. for  $C_{31}H_{44}O_7Na$ , 551.2985), see Fig. S5A; NMR spectra, see Fig. S5B–H; NMR data, see Table S5; **9** is identified as 16 $\beta$ -acetyloxy-6 $\alpha$ ,7 $\beta$ -dihydroxy-29-norprotosta-1,17(20)*Z*,24-trien-3-one-21-oic acid.

Compound **10**: white powder;  $[\alpha]_D^{26} +42.6$  ( $c$  0.47,  $CH_3OH$ ); UV ( $CH_3OH$ )  $\lambda_{max}$  ( $\log \epsilon$ ) 204 nm (3.75); IR (KBr)  $\nu_{max}$  3446, 2921, 2853, 1719, 1671, 1454, 1375, 1250, 1028  $cm^{-1}$ ; HRESIMS (positive)  $m/z$  513.3224  $[M + H]^+$  (Calcd. for  $C_{31}H_{45}O_6$ , 513.3216), see Fig. S6A; NMR spectra, see Fig. S6B–H; NMR data, see Table S6; **10** is identified as 16 $\beta$ -acetyloxy-6 $\alpha$ -hydroxy-29-norprotosta-1,17(20)*Z*,24-trien-3-one-21-oic acid.

Compound **11**: white powder;  $[\alpha]_D^{26} +31.0$  ( $c$  0.98,  $CH_3OH$ ); UV ( $CH_3OH$ )  $\lambda_{max}$  ( $\log \epsilon$ ) 204 nm (4.44); IR (KBr)  $\nu_{max}$  3423, 2973, 2938, 2876, 1715, 1669, 1453, 1376, 1254, 1141, 1028  $cm^{-1}$ ; HRESIMS (positive)  $m/z$  513.3211  $[M + H]^+$  (Calcd. for  $C_{31}H_{45}O_6$ , 513.3216), see Fig. S7A; NMR spectra, see Fig. S7B–H; NMR data, see Table S7; **11** is identified as 16 $\beta$ -acetyloxy-7 $\beta$ -hydroxy-29-norprotosta-1,17(20)*Z*,24-trien-3-one-21-oic acid.

Compound **12**: white powder;  $[\alpha]_D^{22} +56.3$  ( $c$  1.82,  $CH_3OH$ ); UV ( $CH_3OH$ )  $\lambda_{max}$  ( $\log \epsilon$ ) 205 nm (3.89); IR (KBr)  $\nu_{max}$  3484, 2968, 2941, 2886, 1711, 1454, 1379, 1263, 1182, 1153, 1106, 1031  $cm^{-1}$ ; HRESIMS (positive)  $m/z$  569.3099  $[M + Na]^+$  (Calcd. for  $C_{31}H_{46}O_8Na$ , 569.3090), see Fig. S8A; NMR spectra, see Fig. S8B–H; NMR data, see Table S8; **12** is identified as 16 $\beta$ -acetyloxy-6 $\alpha$ ,7 $\beta$ ,11 $\alpha$ -trihydroxy-29-norprotosta-17(20)*Z*,24-dien-3-one-21-oic acid.

Compound **13**: white powder;  $[\alpha]_D^{23} +15.7$  ( $c$  0.54,  $CH_3OH$ ); UV ( $CH_3OH$ )  $\lambda_{max}$  ( $\log \epsilon$ ) 204 nm (3.91); IR (KBr)  $\nu_{max}$  3450, 2940, 2876, 1714, 1551, 1447, 1378, 1263, 1184, 1151, 1026  $cm^{-1}$ ; HRESIMS (positive)  $m/z$  555.3290  $[M + Na]^+$  (Calcd. for  $C_{31}H_{48}O_7Na$ , 555.3298), see Fig. S9A; NMR spectra, see Fig. S9B–H; NMR data, see Table S9; **13** is identified as

16 $\beta$ -acetyloxy-3 $\beta$ ,7 $\beta$ ,11 $\alpha$ -trihydroxy-29-norprotosta-17(20)Z,24-dien-21-oic acid.

Compound **14**: white powder;  $[\alpha]_D^{23} +48.6$  ( $c$  0.37, CH<sub>3</sub>OH); UV (CH<sub>3</sub>OH)  $\lambda_{\max}$  (log  $\epsilon$ ) 205 nm (3.97); IR (KBr)  $\nu_{\max}$  3441, 2970, 2939, 2883, 1703, 1649, 1383, 1261, 1019 cm<sup>-1</sup>; HRESIMS (positive)  $m/z$  553.3136 [M + Na]<sup>+</sup> (Calcd. for C<sub>31</sub>H<sub>46</sub>O<sub>7</sub>Na, 553.3141), see Fig. S10A; NMR spectra, see Fig. S10B–H; NMR data, see Table S10; **14** is identified as 16 $\beta$ -acetyloxy-6 $\alpha$ ,11 $\alpha$ -dihydroxy-29-norprotosta-17(20)Z,24-dien-3-one-21-oic acid.

Compound **15**: white powder;  $[\alpha]_D^{23} +22.4$  ( $c$  0.62, CH<sub>3</sub>OH); UV (CH<sub>3</sub>OH)  $\lambda_{\max}$  (log  $\epsilon$ ) 204 nm (3.88); IR (KBr)  $\nu_{\max}$  3500, 2966, 2941, 2880, 1703, 1557, 1452, 1378, 1262, 1194, 1150, 1105, 1031 cm<sup>-1</sup>; HRESIMS (positive)  $m/z$  553.3130 [M + Na]<sup>+</sup> (Calcd. for C<sub>31</sub>H<sub>46</sub>O<sub>7</sub>Na, 553.3141), see Fig. S11A; NMR spectra, see Fig. S11B–H; NMR data, see Table S11; **15** is identified as 16 $\beta$ -acetyloxy-7 $\beta$ ,11 $\alpha$ -dihydroxy-29-norprotosta-17(20)Z,24-dien-3-one-21-oic acid.

Compound **17**: white powder;  $[\alpha]_D^{24} -38.5$  ( $c$  0.55, CH<sub>3</sub>OH); UV (CH<sub>3</sub>OH)  $\lambda_{\max}$  (log  $\epsilon$ ) 204 nm (3.90); IR (KBr)  $\nu_{\max}$  3444, 2980, 2936, 2871, 1712, 1650, 1454, 1440, 1377, 1263, 1182, 1153, 1101, 1033 cm<sup>-1</sup>; HRESIMS (positive)  $m/z$  569.3085 [M + Na]<sup>+</sup> (Calcd. for C<sub>31</sub>H<sub>46</sub>O<sub>8</sub>Na, 569.3090), see Fig. S12A; NMR spectra, see Fig. S12B–H; NMR data, see Table S12; **17** is identified as 16 $\beta$ -acetyloxy-3 $\beta$ ,6 $\beta$ ,11 $\alpha$ -trihydroxy-29-norprotosta-17(20)Z,24-dien-7-one-21-oic acid.

Compound **18**: white powder;  $[\alpha]_D^{25} -10.4$  ( $c$  5.08, CH<sub>3</sub>OH); UV (CH<sub>3</sub>OH)  $\lambda_{\max}$  (log  $\epsilon$ ) 204 nm (3.99); IR (KBr)  $\nu_{\max}$  3451, 2961, 2934, 2869, 1716, 1444, 1377, 1264, 1175, 1137, 1062, 1038 cm<sup>-1</sup>; HRESIMS (positive)  $m/z$  555.3280 [M + Na]<sup>+</sup> (Calcd. for C<sub>31</sub>H<sub>48</sub>O<sub>7</sub>Na, 555.3298), see Fig. S13A; NMR spectra, see Fig. S13B–H; NMR data, see Table S13; **18** is identified as 16 $\beta$ -acetyloxy-3 $\beta$ ,7 $\alpha$ ,11 $\alpha$ -trihydroxy-29-norprotosta-17(20)Z,24-dien-21-oic acid.

Compound **19**: white powder;  $[\alpha]_D^{22} -24.3$  ( $c$  0.45, CH<sub>3</sub>OH); UV (CH<sub>3</sub>OH)  $\lambda_{\max}$  (log  $\epsilon$ ) 204 nm (3.86); IR (KBr)  $\nu_{\max}$  3439, 2952, 2930, 2871, 1707, 1557, 1438, 1425, 1378, 1266, 1188, 1144, 1078, 1054, 1022 cm<sup>-1</sup>; HRESIMS (positive)  $m/z$  553.3141 [M + Na]<sup>+</sup> (Calcd. for C<sub>31</sub>H<sub>46</sub>O<sub>7</sub>Na, 553.3141), see Fig. S14A; NMR spectra, see Fig. S14B–H; NMR data, see Table S14; **19** is identified as 16 $\beta$ -acetyloxy-3 $\beta$ ,11 $\alpha$ -dihydroxy-29-norprotosta-17(20)Z,24-dien-7-one-21-oic acid.

Compound **20**: white powder;  $[\alpha]_D^{22} -29.1$  ( $c$  0.40, CH<sub>3</sub>OH); UV (CH<sub>3</sub>OH)  $\lambda_{\max}$  (log  $\epsilon$ ) 205 nm (3.96); IR (KBr)  $\nu_{\max}$  3472, 2973, 1697, 1457, 1375, 1263, 1185, 1048, 1107, 1069, 1035 cm<sup>-1</sup>; HRESIMS (positive)  $m/z$  567.2930 [M + Na]<sup>+</sup> (Calcd. for C<sub>31</sub>H<sub>44</sub>O<sub>8</sub>Na, 567.2934), see Fig. S15A; NMR spectra, see Fig. S15B–H; NMR data, see Table S15; **20** is identified as

16 $\beta$ -acetyloxy-6 $\beta$ ,11 $\alpha$ -dihydroxy-29-norprotosta-17(20)Z,24-dien-3,7-dione-21-oic acid.

Compound **21**: white powder;  $[\alpha]_D^{22}$   $-12.0$  ( $c$  1.37, CH<sub>3</sub>OH); UV (CH<sub>3</sub>OH)  $\lambda_{\max}$  ( $\log \epsilon$ ) 206 nm (3.80); IR (KBr)  $\nu_{\max}$  3502, 2969, 2938, 2886, 1703, 1444, 1378, 1260, 1177, 1147, 1066, 1036, 1010 cm<sup>-1</sup>; HRESIMS (positive)  $m/z$  553.3130 [M + Na]<sup>+</sup>, (Calcd. for C<sub>31</sub>H<sub>46</sub>O<sub>7</sub>Na, 553.3141), see Fig. S16A; NMR spectra, see Fig. S16B–H; NMR data, see Table S16; **21** is identified as 16 $\beta$ -acetyloxy-7 $\alpha$ ,11 $\alpha$ -dihydroxy-29-norprotosta-17(20)Z,24-dien-3-one-21-oic acid.

Compound **22**: white powder;  $[\alpha]_D^{28}$   $-20.7$  ( $c$  5.08, CH<sub>3</sub>OH); UV (CH<sub>3</sub>OH)  $\lambda_{\max}$  ( $\log \epsilon$ ) 207 nm (3.93); IR (KBr)  $\nu_{\max}$  3464, 2972, 1708, 1455, 1378, 1258, 1196, 1147, 1071, 1038 cm<sup>-1</sup>; HRESIMS (positive)  $m/z$  551.2984 [M + Na]<sup>+</sup>, (Calcd. for C<sub>31</sub>H<sub>44</sub>O<sub>7</sub>Na, 551.2985), see Fig. S17A; NMR spectra, see Fig. S17B–H; NMR data, see Table S17; **22** is identified as 16 $\beta$ -acetyloxy-11 $\alpha$ -hydroxy-29-norprotosta-17(20)Z,24-dien-3,7-dione-21-oic acid.

Compound **23**: white powder;  $[\alpha]_D^{24}$   $-50.5$  ( $c$  0.60, CH<sub>3</sub>OH); UV (CH<sub>3</sub>OH)  $\lambda_{\max}$  ( $\log \epsilon$ ) 205 nm (3.83); IR (KBr)  $\nu_{\max}$  3445, 2975, 2938, 2874, 1714, 1467, 1376, 1259, 1158, 1074, 1030, 1000 cm<sup>-1</sup>; HRESIMS (positive)  $m/z$  553.3129 [M + Na]<sup>+</sup> (Calcd. for C<sub>31</sub>H<sub>46</sub>O<sub>7</sub>Na, 553.3141), see Fig. S18A; NMR spectra, see Fig. S18B–H; NMR data, see Table S18; **23** is identified as 16 $\beta$ -acetyloxy-3 $\alpha$ ,6 $\beta$ -dihydroxy-29-norprotosta-17(20)Z,24-dien-7-one-21-oic acid.

Compound **24**: white powder;  $[\alpha]_D^{26}$   $-26.5$  ( $c$  0.17, CH<sub>2</sub>Cl<sub>2</sub>); UV (CH<sub>3</sub>OH)  $\lambda_{\max}$  ( $\log \epsilon$ ) 204 nm (4.52); IR (KBr)  $\nu_{\max}$  3121, 2951, 2870, 1713, 1447, 1399, 1265, 1140 cm<sup>-1</sup>; HRESIMS (positive)  $m/z$  539.3366 [M + Na]<sup>+</sup>, (Calcd. for C<sub>31</sub>H<sub>48</sub>O<sub>6</sub>Na, 539.3349), see Fig. S19A; NMR spectra, see Fig. S19B–H; NMR data, see Table S19; **24** is identified as 16 $\beta$ -acetyloxy-3 $\alpha$ ,7 $\alpha$ -dihydroxy-29-norprotosta-17(20)Z,24-dien-21-oic acid.

Compound **25**: white powder;  $[\alpha]_D^{26}$   $-30.8$  ( $c$  0.50, CH<sub>2</sub>Cl<sub>2</sub>); UV (CH<sub>3</sub>OH)  $\lambda_{\max}$  ( $\log \epsilon$ ) 204 nm (3.75); IR (KBr)  $\nu_{\max}$  3404, 2980, 2963, 2934, 2872, 1741, 1700, 1678, 1443, 1376, 1245, 1177, 1145, 1028 cm<sup>-1</sup>; HRESIMS (positive)  $m/z$  537.3196 [M + Na]<sup>+</sup>, (Calcd. for C<sub>31</sub>H<sub>46</sub>O<sub>6</sub>Na, 537.3192), see Fig. S20A; NMR spectra, see Fig. S20B–H; NMR data, see Table S20; **25** is identified as 16 $\beta$ -acetyloxy-3 $\alpha$ -hydroxy-29-norprotosta-17(20)Z,24-dien-7-one-21-oic acid

Compound **26**: white powder;  $[\alpha]_D^{26}$   $-47.1$  ( $c$  1.25, CH<sub>3</sub>OH); UV (CH<sub>3</sub>OH)  $\lambda_{\max}$  ( $\log \epsilon$ ) 204 nm (3.97), 232 nm (3.99); IR (KBr)  $\nu_{\max}$  3447, 2971, 2928, 2855, 1712, 1666, 1456, 1377, 1257, 1034 cm<sup>-1</sup>; HRESIMS (positive)  $m/z$  543.2949 [M + H]<sup>+</sup> (Calcd. for C<sub>31</sub>H<sub>43</sub>O<sub>8</sub>, 543.2958), see Fig. S21A; NMR spectra, see Fig. S21B–H; NMR data, see Table S21; **26** is identified as 16 $\beta$ -acetyloxy-6 $\beta$ ,11 $\alpha$ -dihydroxy-29-norprotosta-1,17(20)Z,24-trien-3,7-dione-21-oic acid.

Compound **29**: white powder;  $[\alpha]_{\text{D}}^{26} -96.0$  ( $c$  0.32, CH<sub>3</sub>OH); UV (CH<sub>3</sub>OH)  $\lambda_{\text{max}}$  ( $\log \epsilon$ ) 204 nm (4.13); IR (KBr)  $\nu_{\text{max}}$  3550, 3024, 2970, 2955, 2929, 2897, 2871, 1723, 1457, 1376, 1254, 1175, 1152, 1109, 1087, 1059, 1033 cm<sup>-1</sup>; HRESIMS (positive)  $m/z$  497.3270 [M + H - H<sub>2</sub>O]<sup>+</sup> (Calcd. for C<sub>31</sub>H<sub>45</sub>O<sub>5</sub>, 497.3267), see Fig. S22A; NMR spectra, see Fig. S22B–H; NMR data, see Table S22; **29** is identified as 16 $\beta$ -acetyloxy-3 $\alpha$ ,11 $\alpha$ -dihydroxy-29-norprotosta-1,17(20)*Z*,24-trien-21-oic acid.

Compound **30**: white powder;  $[\alpha]_{\text{D}}^{26} -117.7$  ( $c$  0.23, CH<sub>2</sub>Cl<sub>2</sub>); UV (CH<sub>3</sub>OH)  $\lambda_{\text{max}}$  ( $\log \epsilon$ ) 204 nm (3.88); IR (KBr)  $\nu_{\text{max}}$  3417, 2959, 2931, 2876, 1712, 1453, 1377, 1258, 1205, 1142, 1035 cm<sup>-1</sup>; HRESIMS (positive)  $m/z$  551.2980 [M + Na]<sup>+</sup> (Calcd. for C<sub>31</sub>H<sub>44</sub>O<sub>7</sub>Na, 551.2985), see Fig. S23A; NMR spectra, see Fig. S23B–H; NMR data, see Table S23; **30** is identified as 16 $\beta$ -acetyloxy-3 $\alpha$ ,6 $\beta$ -dihydroxy-29-norprotosta-1,17(20)*Z*,24-trien-7-one-21-oic acid.

Compound **31**: white powder; HRESIMS (positive)  $m/z$  513.3204 [M + H]<sup>+</sup> (Calcd. for C<sub>31</sub>H<sub>45</sub>O<sub>6</sub>, 513.3216), see Fig. S24A; NMR spectra, see Fig. S24 B–H; NMR data, see Table S24; **31** is identified as 16 $\beta$ -acetyloxy-7 $\alpha$ -hydroxy-29-norprotosta-1,17(20)*Z*,24-trien-3-one-21-oic acid (Maunakeanolic acid A).

Compound **32**: white powder;  $[\alpha]_{\text{D}}^{26} -36.9$  ( $c$  0.42, CH<sub>3</sub>OH); UV (CH<sub>3</sub>OH)  $\lambda_{\text{max}}$  ( $\log \epsilon$ ) 204 nm (3.95); IR (KBr)  $\nu_{\text{max}}$  3443, 2965, 2932, 2867, 1718, 1451, 1376, 1261, 1036 cm<sup>-1</sup>; HRESIMS (positive)  $m/z$  537.3209 [M + Na]<sup>+</sup> (Calcd. for C<sub>31</sub>H<sub>46</sub>O<sub>6</sub>Na, 537.3192), see Fig. S25A; NMR spectra, see Fig. S25B–H; NMR data, see Table S25; **32** is identified as 16 $\beta$ -acetyloxy-3 $\alpha$ ,7 $\alpha$ -dihydroxy-29-norprotosta-1,17(20)*Z*,24-trien-21-oic acid.

Compound **33**: white powder;  $[\alpha]_{\text{D}}^{26} +39.2$  ( $c$  0.53, CH<sub>3</sub>OH); UV (CH<sub>3</sub>OH)  $\lambda_{\text{max}}$  ( $\log \epsilon$ ) 204 nm (4.11), 231 nm (4.14); IR (KBr)  $\nu_{\text{max}}$  3423, 2976, 2929, 2870, 1731, 1704, 1669, 1445, 1400, 1380, 1244, 1190, 1143, 1030 cm<sup>-1</sup>; HRESIMS (positive)  $m/z$  533.2862 [M + Na]<sup>+</sup> (Calcd. for C<sub>31</sub>H<sub>42</sub>O<sub>6</sub>Na, 533.2879), see Fig. S26A; NMR spectra, see Fig. S26B–H; NMR data, see Table S26; **33** is identified as 16 $\beta$ -acetyloxy-29-norprotosta-1,17(20)*Z*,24-trien-3,7-dione-21-oic acid.

Compound **34**: white powder;  $[\alpha]_{\text{D}}^{26} -100.1$  ( $c$  0.13, CH<sub>3</sub>OH); UV (CH<sub>3</sub>OH)  $\lambda_{\text{max}}$  ( $\log \epsilon$ ) 204 nm (3.90); IR (KBr)  $\nu_{\text{max}}$  3396, 2972, 2929, 2870, 1742, 1703, 1454, 1374, 1257, 1146, 1028 cm<sup>-1</sup>; HRESIMS (positive)  $m/z$  535.3053 [M + Na]<sup>+</sup> (Calcd. for C<sub>31</sub>H<sub>44</sub>O<sub>6</sub>Na, 535.3036), see Fig. S27A; NMR spectra, see Fig. S27B–H; NMR data, see Table S27; **34** is identified as 16 $\beta$ -acetyloxy-3 $\alpha$ -hydroxy-29-norprotosta-1,17(20)*Z*,24-trien-7-one-21-oic acid.

Compound **35**: white powder;  $[\alpha]_{\text{D}}^{29} +121.7$  ( $c$  1.0, CH<sub>3</sub>OH); UV (CH<sub>3</sub>OH)  $\lambda_{\text{max}}$  ( $\log \epsilon$ ) 205 nm

(4.50); IR (KBr)  $\nu_{\max}$  3353, 2967, 2932, 2873, 1714, 1542, 1456, 1433, 1382, 1267, 1077, 1033, 1017  $\text{cm}^{-1}$ ; HRESIMS (positive)  $m/z$  545.3113  $[\text{M} + \text{H} - \text{H}_2\text{O}]^+$ , (Calcd. for  $\text{C}_{31}\text{H}_{45}\text{O}_8$ , 545.3114), see Fig. S28A; NMR spectra, see Fig. S28B–H; NMR data, see Table S28; **35** is identified as

16 $\beta$ -acetyloxy-1 $\alpha$ ,6 $\alpha$ ,7 $\beta$ ,11 $\alpha$ -tetrahydroxy-29-norprotosta-17(20)*Z*,24-dien-3-one-21-oic acid.

Compound **36**: white powder;  $[\alpha]_{\text{D}}^{29}$  +29.6 (*c* 0.7,  $\text{CH}_3\text{OH}$ ); UV ( $\text{CH}_3\text{OH}$ )  $\lambda_{\max}$  ( $\log \epsilon$ ) 196 nm (4.88); IR (KBr)  $\nu_{\max}$  3398, 2969, 2935, 2873, 1713, 1663, 1554, 1442, 1381, 1266, 1028  $\text{cm}^{-1}$ ; HRESIMS (positive)  $m/z$  529.3177  $[\text{M} + \text{H}]^+$  (Calcd. for  $\text{C}_{31}\text{H}_{45}\text{O}_7$ , 529.3165), see Fig. S29A; NMR spectra, see Fig. S29B–H; NMR data, see Table S29; **36** is identified as 16 $\beta$ -acetyloxy-6 $\alpha$ ,11 $\alpha$ -dihydroxy-29-norprotosta-1,17(20)*Z*,24-trien-3-one-21-oic acid.

Compound **37**: white powder;  $[\alpha]_{\text{D}}^{29}$  +30.4 (*c* 2.57,  $\text{CH}_3\text{OH}$ ); UV ( $\text{CH}_3\text{OH}$ )  $\lambda_{\max}$  ( $\log \epsilon$ ) 210 nm (4.02), 227 nm (4.01); IR (KBr)  $\nu_{\max}$  2967, 2929, 2870, 1715, 1666, 1438, 1376, 1036, 1007; HRESIMS (positive)  $m/z$  529.3165  $[\text{M} + \text{H}]^+$  (Calcd. for  $\text{C}_{31}\text{H}_{45}\text{O}_7$ , 529.3165), see Fig. S30A; NMR spectra, see Fig. S30B–H; NMR data, see Table S30; **37** is identified as 16 $\beta$ -acetyloxy-7 $\alpha$ ,11 $\alpha$ -dihydroxy-29-norprotosta-1,17(20)*Z*,24-trien-3-one-21-oic acid.

Compound **38**: white powder;  $[\alpha]_{\text{D}}^{29}$  +75.2 (*c* 0.93,  $\text{CH}_3\text{OH}$ ); UV ( $\text{CH}_3\text{OH}$ )  $\lambda_{\max}$  ( $\log \epsilon$ ) 205 nm (3.96); IR (KBr)  $\nu_{\max}$  3442, 2962, 2929, 2870, 1712, 1546, 1440, 1381, 1265, 1038, 1007; HRESIMS (positive)  $m/z$  469.2958  $[\text{M} + \text{H} - \text{H}_2\text{O} - \text{CH}_3\text{COOH}]^+$  (Calcd. for  $\text{C}_{29}\text{H}_{41}\text{O}_5$ , 469.2954), see Fig. S31A; NMR spectra, see Fig. S31B–H; NMR data, see Table S31; **38** is identified as

16 $\beta$ -acetyloxy-1 $\alpha$ ,7 $\alpha$ ,11 $\alpha$ -trihydroxy-29-norprotosta-17(20)*Z*,24-dien-3-one-21-oic acid.

Compound **39**: white powder;  $[\alpha]_{\text{D}}^{29}$  -53.4 (*c* 0.47,  $\text{CH}_3\text{OH}$ ); UV ( $\text{CH}_3\text{OH}$ )  $\lambda_{\max}$  ( $\log \epsilon$ ) 204 nm (4.35), 231 nm (4.21); IR (KBr)  $\nu_{\max}$  3299, 2972, 2919, 2851, 1714, 1671, 1542, 1457, 1436, 1419, 1384, 1264, 1035  $\text{cm}^{-1}$ ; HRESIMS (positive)  $m/z$  467.2789  $[\text{M} + \text{H} - \text{CH}_3\text{COOH}]^+$  (Calcd. for  $\text{C}_{29}\text{H}_{39}\text{O}_5$ , 467.2797), see Fig. S32A; NMR spectra, see Fig. S32B–H; NMR data, see Table S32; **39** is identified as 16 $\beta$ -acetyloxy-11 $\alpha$ -hydroxy-29-norprotosta-1,17(20)*Z*,24-trien-3,7-dione-21-oic acid.

Compound **40**: white powder;  $[\alpha]_{\text{D}}^{29}$  +13.1 (*c* 1.7,  $\text{CH}_3\text{OH}$ ); UV ( $\text{CH}_3\text{OH}$ )  $\lambda_{\max}$  ( $\log \epsilon$ ) 206 nm (3.83); IR (KBr)  $\nu_{\max}$  3485, 2968, 2932, 2870, 1713, 1455, 1379, 1260, 1165, 1029  $\text{cm}^{-1}$ ; HRESIMS (positive)  $m/z$  469.2954  $[\text{M} + \text{H} - \text{H}_2\text{O} - \text{CH}_3\text{COOH}]^+$  (Calcd. for  $\text{C}_{29}\text{H}_{41}\text{O}_5$ , 469.2954), see Fig. S33A; NMR spectra, see Fig. S33B–H; NMR data, see Table S33; **40** is identified as

16 $\beta$ -acetyloxy-1 $\alpha$ ,7 $\beta$ ,11 $\alpha$ -trihydroxy-29-norprotosta-17(20)*Z*,24-dien-3-one-21-oic acid.

Compound **41**: white powder;  $[\alpha]_D^{29} -7.9$  ( $c$  1.13, CH<sub>3</sub>OH); UV (CH<sub>3</sub>OH)  $\lambda_{\max}$  ( $\log \epsilon$ ) 203 nm (4.05); IR (KBr)  $\nu_{\max}$  2918, 2874, 2848, 1715, 1596, 1543, 1454, 1383, 1359, 1272, 1032 cm<sup>-1</sup>; HRESIMS (positive)  $m/z$  553.3124 [M + Na]<sup>+</sup> (Calcd. for C<sub>31</sub>H<sub>46</sub>O<sub>7</sub>Na, 553.3141), see Fig. S34A; NMR spectra, see Fig. S34B–H; NMR data, see Table S34; **41** is identified as 16 $\beta$ -acetyloxy-3 $\alpha$ ,6 $\alpha$ ,7 $\beta$ -trihydroxy-29-norprotosta-1,17(20)*Z*,24-trien-21-oic acid.

Compound **42**: white powder;  $[\alpha]_D^{27} -26.1$  ( $c$  0.67, CH<sub>3</sub>OH); UV (CH<sub>3</sub>OH)  $\lambda_{\max}$  ( $\log \epsilon$ ) 203 nm (4.17); IR (KBr)  $\nu_{\max}$  3439, 2952, 2933, 2871, 1714, 1649, 1442, 1377, 1268, 1021 cm<sup>-1</sup>; HRESIMS (positive)  $m/z$  495.3103 [M + H – H<sub>2</sub>O]<sup>+</sup> (Calcd. for C<sub>31</sub>H<sub>43</sub>O<sub>5</sub>, 495.3110), see Fig. S35A; NMR spectra, see Fig. S35B–H; NMR data, see Table S35; **42** is identified as 16 $\beta$ -acetyloxy-3 $\alpha$ -hydroxy-29-norprotosta-1,17(20)*Z*,24-trien-6-one-21-oic acid.

Compound **43**: white powder;  $[\alpha]_D^{29} -8.2$  ( $c$  1.67, CH<sub>3</sub>OH); UV (CH<sub>3</sub>OH)  $\lambda_{\max}$  ( $\log \epsilon$ ) 203 nm (5.05); IR (KBr)  $\nu_{\max}$  3515, 2942, 2870, 1713, 1450, 1379, 1269, 1026 cm<sup>-1</sup>; HRESIMS (positive)  $m/z$  537.3190 [M + Na]<sup>+</sup> (Calcd. for C<sub>31</sub>H<sub>46</sub>O<sub>6</sub>Na, 537.3192), see Fig. S36A; NMR spectra, see Fig. S36B–H; NMR data, see Table S36; **43** is identified as 16 $\beta$ -acetyloxy-3 $\alpha$ ,7 $\beta$ -dihydroxy-29-norprotosta-1,17(20)*Z*,24-trien-21-oic acid.

Compound **44**: white powder;  $[\alpha]_D^{26} +9.3$  ( $c$  1.23, CH<sub>3</sub>OH); UV (CH<sub>3</sub>OH)  $\lambda_{\max}$  ( $\log \epsilon$ ) 206 nm (4.10), 231 nm (4.13); IR (KBr)  $\nu_{\max}$  3449, 2963, 2933, 2877, 1731, 1675, 1564, 1455, 1376, 1251, 1034 cm<sup>-1</sup>; HRESIMS (positive)  $m/z$  593.3098 [M + Na]<sup>+</sup> (Calcd. for C<sub>33</sub>H<sub>46</sub>O<sub>8</sub>Na, 593.3090), see Fig. S37A; NMR spectra, see Fig. S37B–H; NMR data, see Table S37; **44** is identified as 6 $\alpha$ ,16 $\beta$ -diacetyloxy-7 $\beta$ -hydroxy-29-norprotosta-1,17(20)*Z*,24-trien-3-one-21-oic acid.

Compound **45**: white powder;  $[\alpha]_D^{26} +19.9$  ( $c$  7.3, CH<sub>3</sub>OH); UV (CH<sub>3</sub>OH)  $\lambda_{\max}$  ( $\log \epsilon$ ) 204 nm (4.03), 230 nm (3.99); IR (KBr)  $\nu_{\max}$  3463.5, 2959, 2932, 2876, 1730, 1676, 1454, 1375, 1249, 1141, 1029 cm<sup>-1</sup>; HRESIMS (positive)  $m/z$  593.3080 [M + Na]<sup>+</sup> (Calcd. for C<sub>33</sub>H<sub>46</sub>O<sub>8</sub>Na, 593.3090), see Fig. S38A; NMR spectra, see Fig. S38B–H; NMR data, see Table S38; **45** is identified as 7 $\beta$ ,16 $\beta$ -diacetyloxy-6 $\alpha$ -hydroxy-29-norprotosta-1,17(20)*Z*,24-trien-3-one-21-oic acid.

Compound **46**: white powder;  $[\alpha]_D^{26} +35.1$  ( $c$  0.87, CH<sub>3</sub>OH); UV (CH<sub>3</sub>OH)  $\lambda_{\max}$  ( $\log \epsilon$ ) 204 nm (4.31), 229 nm (4.20); IR (KBr)  $\nu_{\max}$  3418, 2959, 2934, 2870, 1731, 1676, 1454, 1245, 1029 cm<sup>-1</sup>; HRESIMS (positive)  $m/z$  577.3149 [M + Na]<sup>+</sup> (Calcd. for C<sub>33</sub>H<sub>46</sub>O<sub>7</sub>Na, 577.3141), see Fig. S39A; NMR spectra, see Fig. S39B–H; NMR data, see Table S39; **46** is identified as 7 $\beta$ ,16 $\beta$ -diacetyloxy-29-norprotosta-1,17(20)*Z*,24-trien-3-one-21-oic acid.

Compound **47**: white powder;  $[\alpha]_D^{21} +19.3$  ( $c$  0.44, CH<sub>3</sub>OH); UV (CH<sub>3</sub>OH)  $\lambda_{\max}$  ( $\log \epsilon$ ) 204 nm

(4.08); IR (KBr)  $\nu_{\max}$  2961, 2934, 2877, 1716, 1653, 1635, 1558, 1454, 1377, 1266, 1179, 1147, 1024  $\text{cm}^{-1}$ ; HRESIMS (positive)  $m/z$  571.3237  $[\text{M} + \text{Na}]^+$  (Calcd. for  $\text{C}_{31}\text{H}_{48}\text{O}_8\text{Na}$ , 571.3247), see Fig. S40A; NMR spectra, see Fig. S40B–H; NMR data, see Table S40; **47** is identified as

16 $\beta$ -acetyloxy-3 $\alpha$ ,6 $\alpha$ ,7 $\beta$ ,11 $\alpha$ -tetrahydroxy-29-norprotosta-17(20)*Z*,24-dien-21-oic acid.

Compound **48**: white powder;  $[\alpha]_{\text{D}}^{21}$  +10.3 ( $c$  0.28,  $\text{CH}_3\text{OH}$ ); UV ( $\text{CH}_3\text{OH}$ )  $\lambda_{\max}$  ( $\log \epsilon$ ) 204 nm (3.94); IR (KBr)  $\nu_{\max}$  3454, 2971, 2935, 2879, 1718, 1446, 1380, 1260, 1145, 1060, 1022  $\text{cm}^{-1}$ ; HRESIMS (positive)  $m/z$  533.3484  $[\text{M} + \text{H}]^+$  (Calcd. for  $\text{C}_{31}\text{H}_{49}\text{O}_7$ , 533.3478), see Fig. S41A; NMR spectra, see Fig. S41B–H; NMR data, see Table S41; **48** is identified as 16 $\beta$ -acetyloxy-3 $\alpha$ ,6 $\alpha$ ,11 $\alpha$ -trihydroxy-29-norprotosta-17(20)*Z*,24-dien-21-oic acid.

Compound **49**: white powder,  $[\alpha]_{\text{D}}^{21}$  14.7 ( $c$  0.19,  $\text{CH}_3\text{OH}$ ); UV ( $\text{CH}_3\text{OH}$ )  $\lambda_{\max}$  ( $\log \epsilon$ ) 204 (3.54); IR (KBr)  $\nu_{\max}$  3446, 2952, 2929, 2874, 1716, 1654, 1558, 1541, 1457, 1377, 1267, 1144, 1105, 1025, 973  $\text{cm}^{-1}$ ; HRESIMS (positive)  $m/z$  533.3497  $[\text{M} + \text{H}]^+$  (Calcd. for  $\text{C}_{31}\text{H}_{49}\text{O}_7$ , 533.3478), see Fig. S42A; NMR spectra, see Fig. S42B–H; NMR data, see Table S42, **49** is identified as

16 $\beta$ -Acetyloxy-3 $\alpha$ ,7 $\beta$ ,11 $\alpha$ -trihydroxy-29-norprotosta-17(20)*Z*,24-dien-21-oic acid.

Compound **50**: white powder;  $[\alpha]_{\text{D}}^{21}$  +20.9 ( $c$  0.63,  $\text{CH}_2\text{Cl}_2$ ); UV ( $\text{CH}_3\text{OH}$ )  $\lambda_{\max}$  ( $\log \epsilon$ ) 204 nm (4.09); IR (KBr)  $\nu_{\max}$  3501, 2968, 2938, 2886, 1715, 1453, 1376, 1256, 1146, 1107, 1032  $\text{cm}^{-1}$ ; HRESIMS (positive)  $m/z$  611.3185  $[\text{M} + \text{Na}]^+$  (Calcd. for  $\text{C}_{33}\text{H}_{48}\text{O}_9\text{Na}$ , 611.3196), see Fig. S43A; NMR spectra, see Fig. S43B–H; NMR data, see Table S43; **50** is identified as 7 $\beta$ ,16 $\beta$ -diacetyloxy-6 $\alpha$ ,11 $\alpha$ -dihydroxy-29-norprotosta-17(20)*Z*,24-dien-3-one-21-oic acid.

Compound **51**: white powder;  $[\alpha]_{\text{D}}^{21}$  +65.2 ( $c$  0.45,  $\text{CH}_3\text{OH}$ ); UV ( $\text{CH}_3\text{OH}$ )  $\lambda_{\max}$  ( $\log \epsilon$ ) 205 nm (4.27); IR (KBr)  $\nu_{\max}$  3484, 2969, 2943, 2886, 1713, 1456, 1440, 1377, 1257, 1032  $\text{cm}^{-1}$ ; HRESIMS (positive)  $m/z$  611.3174  $[\text{M} + \text{Na}]^+$  (Calcd. for  $\text{C}_{33}\text{H}_{48}\text{O}_9\text{Na}$ , 611.3196), see Fig. S44A; NMR spectra, see Fig. S44B–H; NMR data, see Table S44; **51** is identified as 6 $\alpha$ ,16 $\beta$ -diacetyloxy-7 $\beta$ ,11 $\alpha$ -dihydroxy-29-norprotosta-17(20)*Z*,24-dien-3-one-21-oic acid.

Compound **52**: white powder;  $[\alpha]_{\text{D}}^{21}$  +40.6 ( $c$  0.42,  $\text{CH}_3\text{OH}$ ); UV ( $\text{CH}_3\text{OH}$ )  $\lambda_{\max}$  ( $\log \epsilon$ ) 201 nm (3.99); IR (KBr)  $\nu_{\max}$  3525, 2957, 2938, 2883, 1715, 1457, 1377, 1253, 1142, 1028  $\text{cm}^{-1}$ ; HRESIMS (positive)  $m/z$  595.3248  $[\text{M} + \text{Na}]^+$  (Calcd. for  $\text{C}_{33}\text{H}_{48}\text{O}_8\text{Na}$ , 595.3247), see Fig. S45A; NMR spectra, see Fig. S45B–H; NMR data, see Table S45; **52** is identified as 6 $\alpha$ ,16 $\beta$ -diacetyloxy-11 $\alpha$ -hydroxy-29-norprotosta-17(20)*Z*,24-dien-3-one-21-oic acid.

Compound **55**: white powder; HRESIMS (positive)  $m/z$  569.3071  $[\text{M} + \text{Na}]^+$  (Calcd. for  $\text{C}_{31}\text{H}_{46}\text{O}_8\text{Na}$ , 569.3090), see Fig. S46A; NMR spectra, see Fig. S46B–H; NMR data, see



Table S46; **55** is identified as 16 $\beta$ -acetyloxy-3 $\alpha$ ,6 $\beta$ ,11 $\alpha$ -trihydroxy-29-norprotosta-17(20)*Z*,24-dien-7-one-21-oic acid (CAS Registry Number: 779980-64-2).

Compound **56**: white powder; HRESIMS (positive) *m/z* 533.3490 [M + H]<sup>+</sup> (Calcd. for C<sub>31</sub>H<sub>49</sub>O<sub>7</sub>, 533.3478), see Fig. S47A; NMR spectra, see Fig. S47B–H; NMR data, see Table S47; **56** is identified as 16 $\beta$ -acetyloxy-3 $\alpha$ ,7 $\alpha$ ,11 $\alpha$ -trihydroxy-29-norprotosta-17(20)*Z*,24-dien-21-oic acid (CAS Registry Number: 35805-38-0).

Compound **57**: white powder; HRESIMS (positive) *m/z* 531.3325 [M + H]<sup>+</sup> (Calcd. for C<sub>31</sub>H<sub>47</sub>O<sub>7</sub>, 531.3322), see Fig. S48A; NMR spectra, see Fig. S48B–H; NMR data, see Table S48; **57** is identified as 16 $\beta$ -acetyloxy-3 $\alpha$ ,11 $\alpha$ -dihydroxy-29-norprotosta-17(20)*Z*,24-dien-7-one-21-oic acid (CAS Registry Number: 764590-42-3).

Compound **58**: white powder; [ $\alpha$ ]<sub>D</sub><sup>26</sup> –66.3 (*c* 2.67, CH<sub>3</sub>OH); UV (CH<sub>3</sub>OH)  $\lambda_{\max}$  (log  $\epsilon$ ) 204 nm (3.65); IR (KBr)  $\nu_{\max}$  3445, 2950, 2930, 2870, 1718, 1652, 1455, 1442, 1375, 1261, 1233, 1154, 1032 cm<sup>-1</sup>; HRESIMS (positive) *m/z* 609.3043 [M + Na]<sup>+</sup> (Calcd. for C<sub>33</sub>H<sub>46</sub>O<sub>9</sub>Na, 609.3040), see Fig. S49A; NMR spectra, see Fig. S49B–H; NMR data, see Table S49; **58** is identified as 6 $\beta$ ,16 $\beta$ -diacetyloxy-11 $\alpha$ -hydroxy-29-norprotosta-17(20)*Z*,24-dien-3,7-dione-21-oic acid.

Compound **59**: white powder, [ $\alpha$ ]<sub>D</sub><sup>26</sup> –85.6 (*c* 0.92, CH<sub>3</sub>OH); UV (CH<sub>3</sub>OH)  $\lambda_{\max}$  (log  $\epsilon$ ) 204 nm (4.07); IR (KBr)  $\nu_{\max}$  3502, 2975, 2935, 2864, 1746, 1713, 1459, 1438, 1375, 1224, 1150, 1060, 1028 cm<sup>-1</sup>; HRESIMS (positive) *m/z* 611.3185 [M + Na]<sup>+</sup> (Calcd. for C<sub>33</sub>H<sub>48</sub>O<sub>9</sub>Na, 611.3196), see Fig. S50A; NMR spectra, see Fig. S50B–H; NMR data, see Table S50; **59** is identified as 6 $\beta$ ,16 $\beta$ -diacetyloxy-3 $\beta$ ,11 $\alpha$ -dihydroxy-29-norprotosta-17(20)*Z*,24-dien-7-one-21-oic acid.

Compound **60**: white powder; [ $\alpha$ ]<sub>D</sub><sup>25</sup> –74.7 (*c* 1.33, CH<sub>3</sub>OH); UV (CH<sub>3</sub>OH)  $\lambda_{\max}$  (log  $\epsilon$ ) 204 nm (3.95); IR (KBr)  $\nu_{\max}$  3395, 2952, 2924, 2852, 1750, 1716, 1652, 1458, 1376, 1255, 1226, 1021 cm<sup>-1</sup>; HRESIMS (positive) *m/z* 595.3240 [M + Na]<sup>+</sup> (Calcd. for C<sub>33</sub>H<sub>48</sub>O<sub>8</sub>Na, 595.3247), see Fig. S51A; NMR spectra, see Fig. S51B–H; NMR data, see Table S51; **60** is identified as 6 $\beta$ ,16 $\beta$ -diacetyloxy-3 $\alpha$ -hydroxy-29-norprotosta-17(20)*Z*,24-dien-7-one-21-oic acid.

Compound **61**: white powder; [ $\alpha$ ]<sub>D</sub><sup>27</sup> –89.0 (*c* 2.33, CH<sub>3</sub>OH); UV (CH<sub>3</sub>OH)  $\lambda_{\max}$  (log  $\epsilon$ ) 204 nm (4.07), 231 nm (4.08); IR (KBr)  $\nu_{\max}$  3546, 3468, 2977, 2941, 2883, 1752, 1725, 1699, 1663, 1457, 1374, 1252, 1214, 1033 cm<sup>-1</sup>; HRESIMS (positive) *m/z* 585.3038 [M + H]<sup>+</sup> (Calcd. for

C<sub>33</sub>H<sub>45</sub>O<sub>9</sub>, 585.3064), see Fig. S52A; NMR spectra, see Fig. S52B–H; NMR data, see Table S52; **61** is identified as

6 $\beta$ ,16 $\beta$ -diacetyloxy-11 $\alpha$ -hydroxy-29-norprotosta-1,17(20)Z,24-trien-3,7-dione-21-oic acid.

Compound **62**: white powder;  $[\alpha]_D^{25}$   $-41.3$  (*c* 0.40, CH<sub>3</sub>OH); UV (CH<sub>3</sub>OH)  $\lambda_{\max}$  (log  $\epsilon$ ) 201 nm (3.98); IR (KBr)  $\nu_{\max}$  3315, 2964, 2929, 2879, 1711, 1593, 1456, 1433, 1382, 1266, 1034 cm<sup>-1</sup>; HRESIMS (positive) *m/z* 567.2936 [M + Na]<sup>+</sup> (Calcd. for C<sub>31</sub>H<sub>44</sub>O<sub>8</sub>Na, 567.2934), see Fig. S53A; NMR spectra, see Fig. S53B–H; NMR data, see Table S53; **62** is identified as 16 $\beta$ -acetyloxy-3 $\alpha$ ,6 $\beta$ ,11 $\alpha$ -trihydroxy-29-norprotosta-1,17(20)Z,24-trien-7-one-21-oic acid.

Compound **63**: white powder;  $[\alpha]_D^{21}$   $-148.3$  (*c* 0.47, CH<sub>3</sub>OH); UV (CH<sub>3</sub>OH)  $\lambda_{\max}$  (log  $\epsilon$ ) 203 nm (4.06); IR (KBr)  $\nu_{\max}$  32970, 2925, 2882, 1751, 1712, 1454, 1374, 1226, 1036 cm<sup>-1</sup>; HRESIMS (positive) *m/z* 571.3270 [M + H]<sup>+</sup> (Calcd. for C<sub>33</sub>H<sub>47</sub>O<sub>8</sub>, 571.3271), see Fig. S54A; NMR spectra, see Figs. S54B–K and S61; NMR data, see Table S54; **63** is identified as 6 $\beta$ ,16 $\beta$ -diacetyloxy-3 $\alpha$ -hydroxy-29-norprotosta-1,17(20)Z,24-trien-7-one-21-oic acid.

Compound **64**: white powder;  $[\alpha]_D^{21}$   $-21.7$  (*c* 1.27, CH<sub>3</sub>OH); UV (CH<sub>3</sub>OH)  $\lambda_{\max}$  (log  $\epsilon$ ) 203 nm (4.00); IR (KBr)  $\nu_{\max}$  3419, 2962, 2932, 2873, 1721, 1652, 1438, 1377, 1256, 1026 cm<sup>-1</sup>; HRESIMS (positive) *m/z* 513.3210 [M + H – CH<sub>3</sub>COOH]<sup>+</sup> (Calcd. for C<sub>31</sub>H<sub>45</sub>O<sub>6</sub>, 513.3216), see Fig. S55A; NMR spectra, see Fig. S55B–H; NMR data, see Table S55; **64** is identified as 7 $\beta$ ,16 $\beta$ -diacetyloxy-3 $\alpha$ ,6 $\alpha$ -dihydroxy-29-norprotosta-1,17(20)Z,24-trien-21-oic acid.

Compound **65**: white powder;  $[\alpha]_D^{27}$   $+18.0$  (*c* 2.13, CH<sub>3</sub>OH); UV (CH<sub>3</sub>OH)  $\lambda_{\max}$  (log  $\epsilon$ ) 203 nm (4.08); IR (KBr)  $\nu_{\max}$  3412, 2960, 2939, 2871, 1731, 1652, 1439, 1375, 1251, 1019 cm<sup>-1</sup>; HRESIMS (positive) *m/z* 579.3308 [M + Na]<sup>+</sup> (Calcd. for C<sub>33</sub>H<sub>48</sub>O<sub>7</sub>Na, 579.3298), see Fig. S56A; NMR spectra, see Fig. S56B–H; NMR data, see Table S56; **65** is identified as 6 $\alpha$ ,16 $\beta$ -diacetyloxy-3 $\alpha$ -hydroxy-29-norprotosta-1,17(20)Z,24-trien-21-oic acid.

Compound **66**: white powder;  $[\alpha]_D^{21}$   $+41.2$  (*c* 1.13, CH<sub>3</sub>OH); UV (CH<sub>3</sub>OH)  $\lambda_{\max}$  (log  $\epsilon$ ) 205 nm (4.07), 231 nm (4.12); IR (KBr)  $\nu_{\max}$  3444, 2977, 2936, 2873, 1734, 1674, 1439, 1375, 1250, 1025 cm<sup>-1</sup>; HRESIMS (positive) *m/z* 555.3330 [M + H]<sup>+</sup> (Calcd. for C<sub>33</sub>H<sub>47</sub>O<sub>7</sub>, 555.3322), see Fig. S57A; NMR spectra, see Fig. S57B–H; NMR data, see Table S57; **66** is identified as 6 $\alpha$ ,16 $\beta$ -diacetyloxy-29-norprotosta-1,17(20)Z,24-trien-3-one-3-one-21-oic acid.

Compound **67**: white powder;  $[\alpha]_D^{29}$   $+27.6$  (*c* 3.8, CH<sub>3</sub>OH); UV (CH<sub>3</sub>OH)  $\lambda_{\max}$  (log  $\epsilon$ ) 206 nm (4.10); IR (KBr)  $\nu_{\max}$  3485, 2952, 2936, 2885, 1719, 1441, 1378, 1261, 1141, 1025 cm<sup>-1</sup>; HRESIMS (positive) *m/z* 597.3405 [M + Na]<sup>+</sup> (Calcd. for C<sub>33</sub>H<sub>50</sub>O<sub>8</sub>Na, 597.3403), see Fig. S58A; NMR spectra, see Fig. S58B–H; NMR data, see Table S58; **67** is identified as 6 $\alpha$ ,16 $\beta$ -diacetyloxy-3 $\alpha$ ,11 $\alpha$ -dihydroxy-29-norprotosta-17(20)Z,24-dien-21-oic acid.

Compound **68**: white powder;  $[\alpha]_D^{26} -92.9$  ( $c$  0.38, CH<sub>3</sub>OH); UV (CH<sub>3</sub>OH)  $\lambda_{\max}$  ( $\log \epsilon$ ) 204 nm (4.02); IR (KBr)  $\nu_{\max}$  3482, 2958, 2935, 2883, 1719, 1440, 1376, 1230, 1144, 1066, 1023 cm<sup>-1</sup>; HRESIMS (positive)  $m/z$  611.3179 [M + Na]<sup>+</sup> (Calcd. for C<sub>33</sub>H<sub>48</sub>O<sub>9</sub>Na, 611.3196), see Fig. S59A; NMR spectra, see Fig. S59B–H; NMR data, see Table S59; **68** is identified as 6 $\beta$ ,16 $\beta$ -diacetyloxy-3 $\alpha$ ,11 $\alpha$ -dihydroxy-29-norprotosta-17(20)*Z*,24-dien-7-one-21-oic acid.

Compound **69**: white powder;  $[\alpha]_D^{26} -58.0$  ( $c$  0.8, CH<sub>3</sub>OH); UV (CH<sub>3</sub>OH)  $\lambda_{\max}$  ( $\log \epsilon$ ) 203 nm (4.08); IR (KBr)  $\nu_{\max}$  3413, 2960, 2929, 2879, 1717, 1648, 1436, 1383, 1263, 1232, 1057, 1019 cm<sup>-1</sup>; HRESIMS (positive)  $m/z$  609.3029 [M + Na]<sup>+</sup> (Calcd. for C<sub>33</sub>H<sub>46</sub>O<sub>9</sub>Na, 609.3040), see Fig. S60A; NMR spectra, see Fig. S60B–H; NMR data, see Table S60; **69** is identified as 6 $\beta$ ,16 $\beta$ -diacetyloxy-3 $\alpha$ ,11 $\alpha$ -dihydroxy-29-norprotosta-1,17(20)*Z*,24-trien-7-one-21-oic acid.

Compound **81**: white powder;  $[\alpha]_D^{28} +63.0$  ( $c$  4.3, CH<sub>3</sub>OH); UV (CH<sub>3</sub>OH)  $\lambda_{\max}$  ( $\log \epsilon$ ) 204 nm (4.10); IR (KBr)  $\nu_{\max}$  3451.0, 3023, 2959, 2933, 2870, 1717, 1648, 1591, 1443, 1374, 1261, 1029, 1006 cm<sup>-1</sup>; HRESIMS (positive)  $m/z$  521.3245 [M + Na]<sup>+</sup> (Calcd. for C<sub>31</sub>H<sub>46</sub>O<sub>5</sub>Na, 521.3243), see Fig. S61A; NMR spectra, see Fig. S61B–H; NMR data, see Table S61; **81** is identified as 16 $\beta$ -acetyloxy-3 $\beta$ -hydroxy-29-norprotosta-1,17(20)*Z*,24-trien-21-oic acid.

#### *Absolute configuration determination of 35, 38 and 40*

As the relative configuration of C-1 of **35**, **38** and **40** cannot be determined *via* ROESY analysis, quantum chemical calculation of NMR shifts was employed. The flexible side chain of fusidane-type antibiotics can lead to more conformations, which has less impact on NMR shifts. Therefore, **35** was simplified as (1*S*\*,4*S*\*,5*S*\*,6*R*\*,7*R*\*,8*S*\*,9*S*\*,10*S*\*,11*R*\*,13*R*\*,14*S*\*,16*S*\*)-**35-A** and (1*R*\*,4*S*\*,5*S*\*,6*R*\*,7*R*\*,8*S*\*,9*S*\*,10*S*\*,11*R*\*,13*R*\*,14*S*\*,16*S*\*)-**35-B** (Fig. S63). The molecules of **35-A** and **35-B** were converted into SIMILES codes before their initial 3D structure were generated with CORINA version 3.4. Conformer databases were generated in CONFLEX version 7.0 using the MMFF94s force-field, with an energy window for acceptable conformers (ewindow) of 5 kcal/mol above the ground state, a maximum number of conformations per molecule (maxconfs) of 100, and an RMSD cutoff (rmsd) of 0.5 Å. Then each conformer of the acceptable conformers was optimized with the HF/6-31G(d) method in Gaussian09. Further optimization at the B3LYP/6-31G(d) level determined the dihedral angles. The optimized conformers (Table S63) were used for <sup>13</sup>C NMR shifts calculation, which was performed with Gaussian09 (mPW1PW91/6-31+G(d,p)). The solvent effect was taken into account by the polarizable-conductor calculation model (PCM, CD<sub>3</sub>OD as the solvent). Computed chemical shifts were scaled empirically according to  $\delta_{\text{corr.}} = \delta_{\text{calcd.}} \times \text{slope}$

+ intercept, where  $\delta_{\text{calcd.}}$  is the calculated chemical shift, and slope and intercept are the slope and intercept resulting from a regression calculation on a plot of  $\delta_{\text{calcd.}}$  against  $\delta_{\text{exptl.}}$ <sup>1</sup>. The comparison was judged by R square ( $R^2$ ) analysis, mean absolute error (MAE) and DP4+ probability<sup>2</sup> (Table S68). Finally, the relative configuration of **35** was determined as 1*S*\*,4*S*\*,5*S*\*,6*R*\*,7*R*\*,8*S*\*,9*S*\*,10*S*\*,11*R*\*,13*R*\*,14*S*\*,16*S*\*, and the absolute configuration was assigned as 1*S*,4*S*,5*S*,6*R*,7*R*,8*S*,9*S*,10*S*,11*R*,13*R*,14*S*,16*S*. Likewise, the optimized conformers (Table S64) were used for <sup>13</sup>C NMR shifts calculation, which was performed with Gaussian09 (mPW1PW91/6-311+G(d,p)) for **38**. The absolute configuration of **38** was assigned as 1*S*,4*S*,5*S*,7*R*,8*S*,9*S*,10*S*,11*R*,13*R*, 14*S*, 16*S* (Fig. S64, Tables S64 and S68). On the basis of comparison of <sup>13</sup>C chemical shifts between **38** and **40** (Table S66), the relative configuration of **40** was determined, and the absolute configuration of **40** was assigned as 1*S*,4*S*,5*S*,7*S*,8*S*,9*S*,10*S*,11*R*,13*R*,14*S*,16*S*.

#### *Absolute configuration determination of 6, 29, 30, 32, 34, 41–43, 63–65 and 69*

For compounds **6**, **29**, **30**, **32**, **34**, **41–43**, **63–65** and **69**, the relative configuration of C-3 cannot be determined *via* NOESY or coupling constants analysis. Therefore, we planned to perform chemical derivatization to obtain analogues bearing 3 $\alpha$ -OH/the C1–C2 double bond and 3 $\beta$ -OH/the C1–C2 double bond. We added **7** (10.0 mg) to a stirred solution of NaBH<sub>4</sub> (5.0 mg) in Et<sub>2</sub>O (10 mL) in an ice and water bath. Then the mixture was stirred in the dark at room temperature for 24 h. The solvent was removed under reduced pressure, and the residue was further purified by semi-preparative HPLC with isocratic elution of 80% CH<sub>3</sub>CN–H<sub>2</sub>O to give **6** (0.5 mg) and **81** (4.1 mg). According to ROESY analysis, the relative configuration of **81** was determined as 3*S*\*,4*S*\*,5*S*\*,8*S*\*,9*S*\*,10*S*\*,13*R*\*,14*S*\*,16*S*\*, and the absolute configuration of **81** was assigned as 3*S*,4*S*,5*S*,8*S*,9*S*,10*S*,13*R*,14*S*,16*S*. Therefore, the absolute configuration of **6**, the epimer of **81** at C-3, was assigned as 3*R*,4*S*,5*S*,8*S*,9*S*,10*S*,13*R*,14*S*,16*S*. And based on the coupling constants (<sup>3</sup> $J_{\text{H-3, H-4}}$  = 4.4 Hz for 3 $\alpha$ -OH, and <sup>3</sup> $J_{\text{H-3, H-4}}$  = 7.9 Hz for 3 $\beta$ -OH), we determined that 3-OH in compounds **29**, **30**, **32**, **34**, **41–43**, **63–65** and **69** was  $\alpha$ -oriented (Table. S69). Additionally, we also performed quantum chemical calculation of NMR shifts for **34** (CD<sub>3</sub>OD as the solvent) and **42** (CDCl<sub>3</sub> as the solvent)<sup>1,2</sup>, and the optimized conformers (Tables S62 and S65) were used for <sup>13</sup>C NMR shifts calculation, which was performed with Gaussian09 (mPW1PW91/6-31+G(d,p)). The results indicated that 3-OH in **34** and **42** was indeed  $\alpha$ -oriented (Figs. S62 and S65, Table S67).

## Supporting Figures

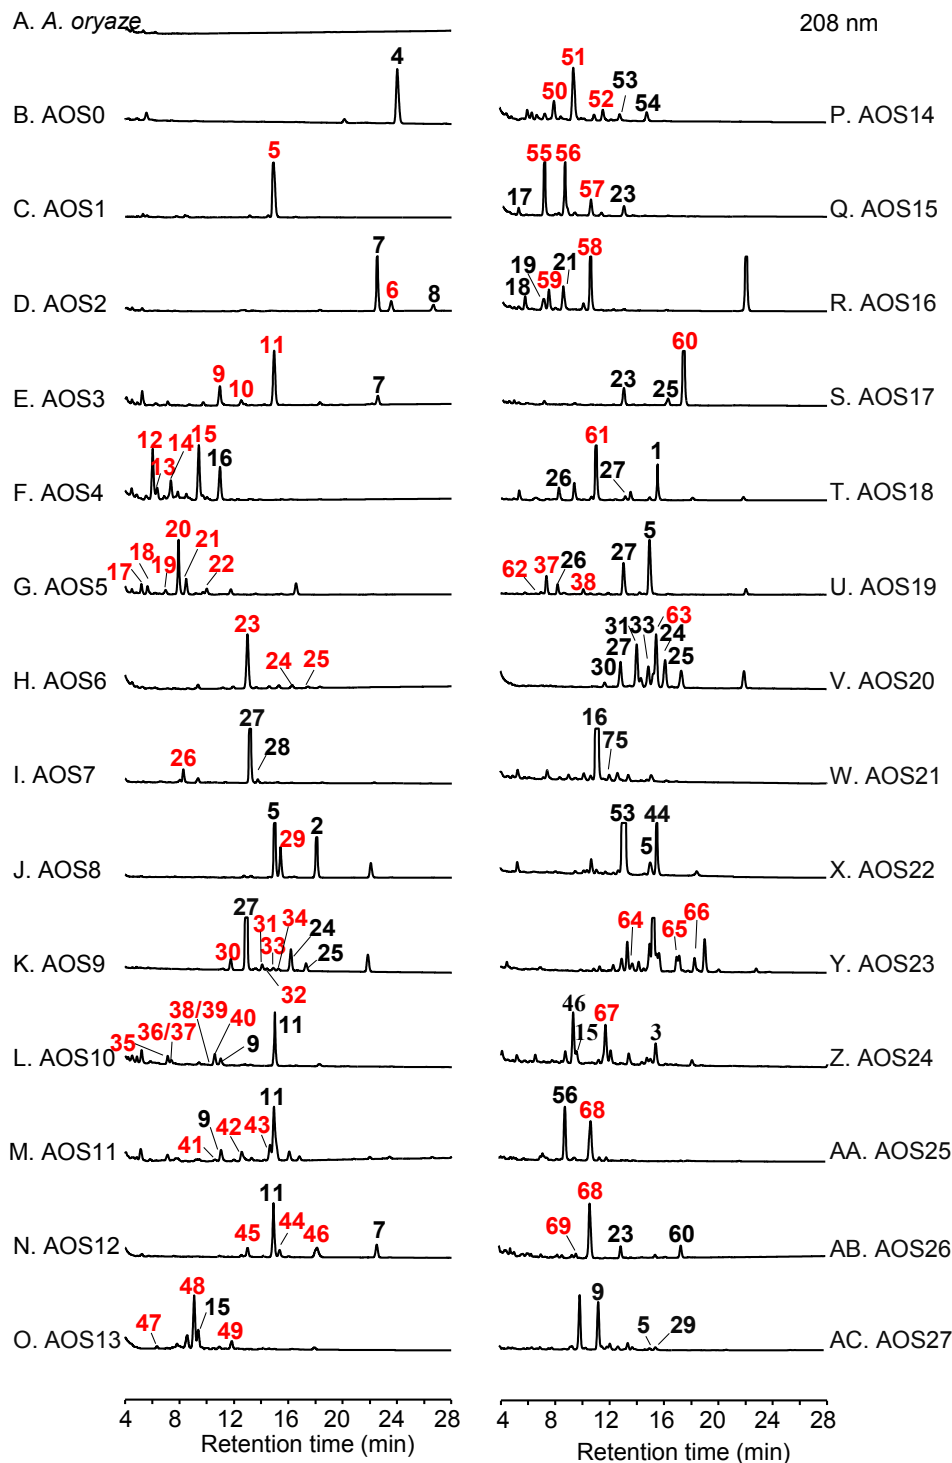

**Figure S1** HPLC analysis of metabolites from *A. oryzae* transformants.

(A) *A. oryzae* NSAR1; (B) *A. oryzae* harboring *helA*, *helB1*, *helB2*, *helC*, *helB4* and *held2* (AOS0); (C) AOS0 harboring *helE* and *fusB1* (AOS1); (D) AOS0 harboring *helE* and *fusC1* (AOS2); (E) AOS0 harboring *helE* and *cepB4* (AOS3); (F) AOS0 harboring *fusB1* and *cepB4* (AOS4); (G) AOS0 harboring *helB3* and *fusB1* (AOS5); (H) AOS0 harboring *helB3* and *fusC1* (AOS6); (I) AOS0 harboring *helE*, *fusB1* and *helB3* (AOS7); (J) AOS0 harboring *helE*, *fusB1*

and *fusC1* (AOS8); (K) AOS0 harboring *helE*, *fusC1* and *helB3* (AOS9); (L) AOS0 harboring *helE*, *fusB1* and *cepB4* (AOS10); (M) AOS0 harboring *helE*, *fusC1* and *cepB4* (AOS11); (N) AOS0 harboring *helE*, *cepB4* and *cepD2* (AOS12); (O) AOS0 harboring *fusB1*, *cepB4* and *fusC1* (AOS13); (P) AOS0 harboring *fusB1*, *cepB4* and *cepD2* (AOS14); (Q) AOS0 harboring *helB3*, *fusB1* and *fusC1* (AOS15); (R) AOS0 harboring *helB3*, *fusB1* and *helD1* (AOS16); (S) AOS0 harboring *helB3*, *fusC1* and *helD1* (AOS17); (T) AOS0 harboring *helE*, *fusB1*, *helB3* and *helD1* (AOS18); (U) AOS0 harboring *helE*, *fusB1*, *helB3* and *fusC1* (AOS19); (V) AOS0 harboring *helE*, *fusC1*, *helB3* and *helD1* (AOS20); (W) AOS0 harboring *helE*, *fusB1*, *cepB4* and *fusC1* (AOS21); (X) AOS0 harboring *helE*, *fusB1*, *cepB4* and *cepD2* (AOS22); (Y) AOS0 harboring *helE*, *cepB4*, *cepD2* and *fusC1* (AOS23); (Z) AOS0 harboring *fusB1*, *fusC1*, *cepB4* and *cepD2* (AOS24); (AA) AOS0 harboring *fusB1*, *fusC1*, *helB3* and *helD1* (AOS25). (AB) AOS0 harboring *helE*, *fusB1*, *fusC1*, *helB3* and *helD1* (AOS26); (AC) AOS0 harboring *helE*, *fusB1*, *fusC1*, *cepB4* and *cepD2* (AOS27).

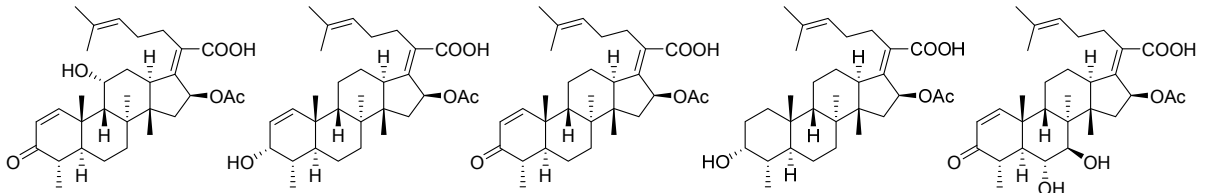

**5**

**6**

**7**

**8**

**9**

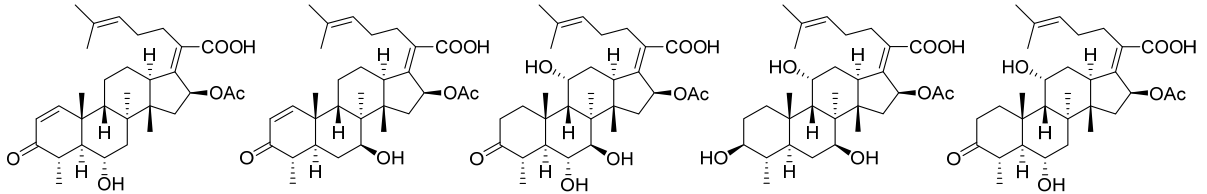

**10**

**11**

**12**

**13**

**14**

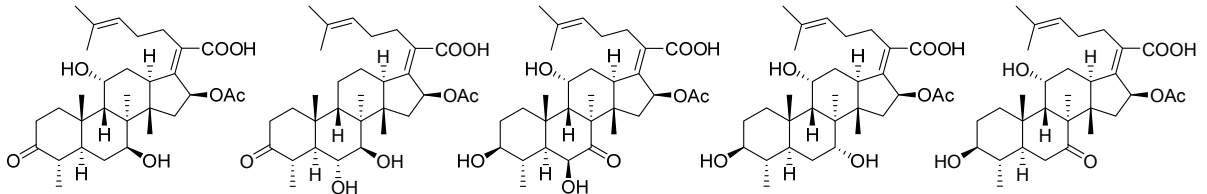

**15**

**16**

**17**

**18**

**19**

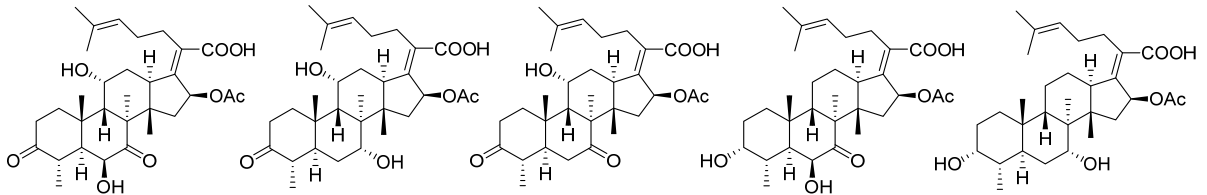

**20**

**21**

**22**

**23**

**24**

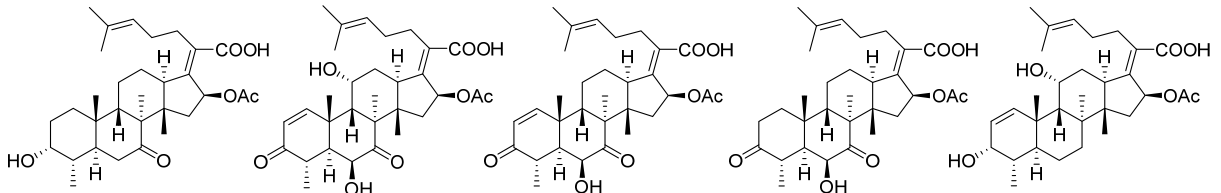

**25**

**26**

**27**

**28**

**29**

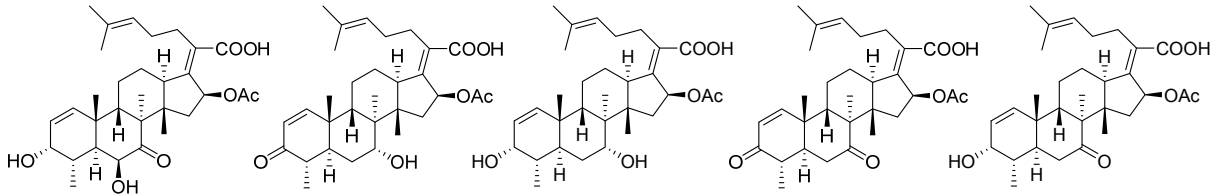

**30**

**31**

**32**

**33**

**34**

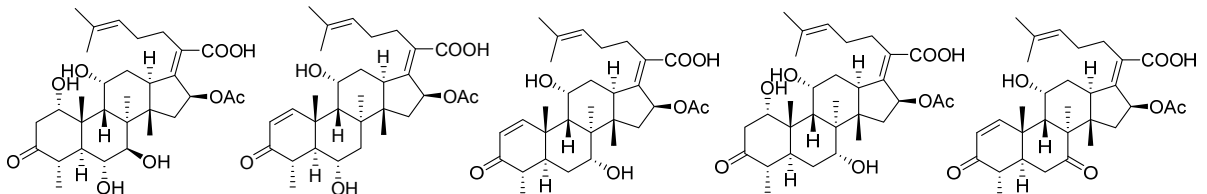

**35**

**36**

**37**

**38**

**39**

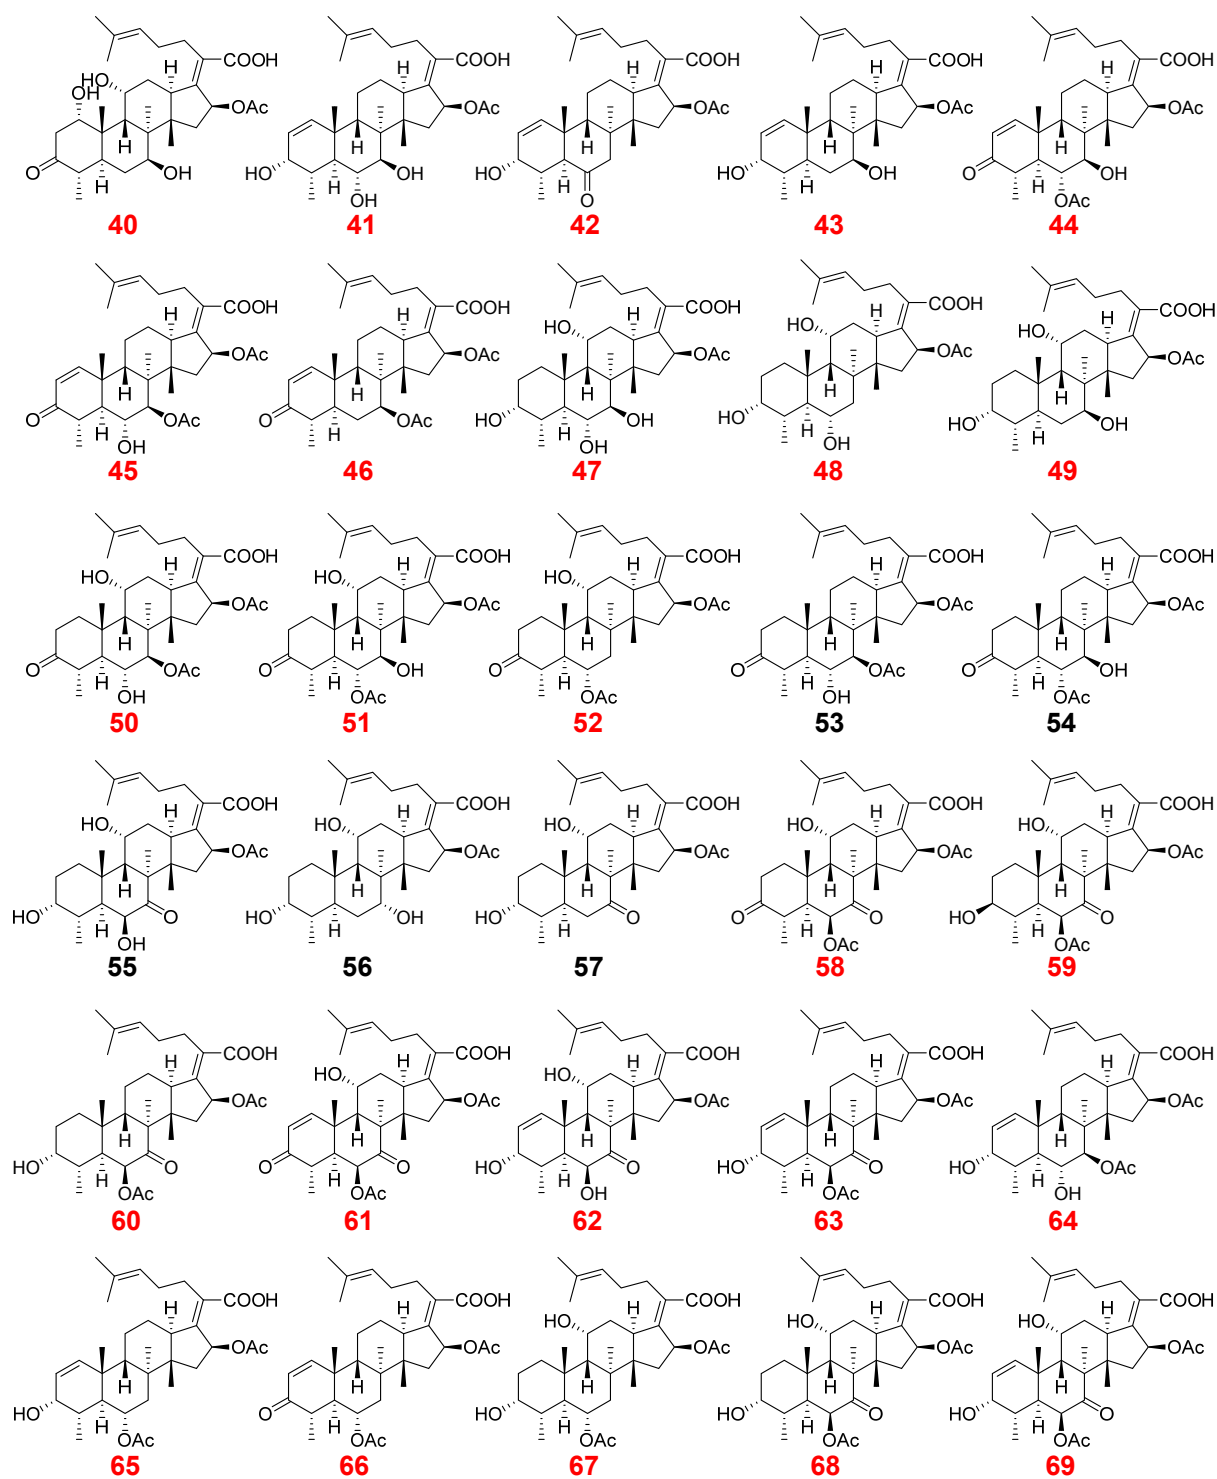

**Figure S2** Fusidane-type antibiotics produced *via* the stochastic combinational strategy. New compounds are marked in red. And compounds 7, 8, 16, 27, 28, 53 and 54 were identified by comparison with standards or mass spectrometry analysis.



A

Monoisotopic Mass, Even Electron Ions  
 248 formula(e) evaluated with 2 results within limits (up to 50 closest results for each mass)  
 Elements Used:

C: 0-500 H: 0-1000 O: 0-200 Na: 0-1

1J

20171028-4 314 (2.528)

1: TOF MS ES+  
 8.01e+004

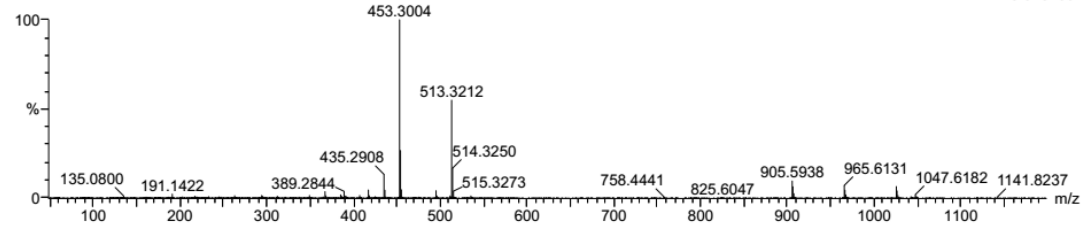

Minimum: -1.5  
 Maximum: 5.0 5.0 50.0

| Mass     | Calc. Mass | mDa  | PPM  | DBE | i-FIT | Norm  | Conf(%) | Formula       |
|----------|------------|------|------|-----|-------|-------|---------|---------------|
| 513.3212 | 513.3216   | -0.4 | -0.8 | 9.5 | 97.3  | 0.908 | 40.32   | C31 H45 O6    |
|          | 513.3192   | 2.0  | 3.9  | 6.5 | 96.9  | 0.516 | 59.68   | C29 H46 O6 Na |

B

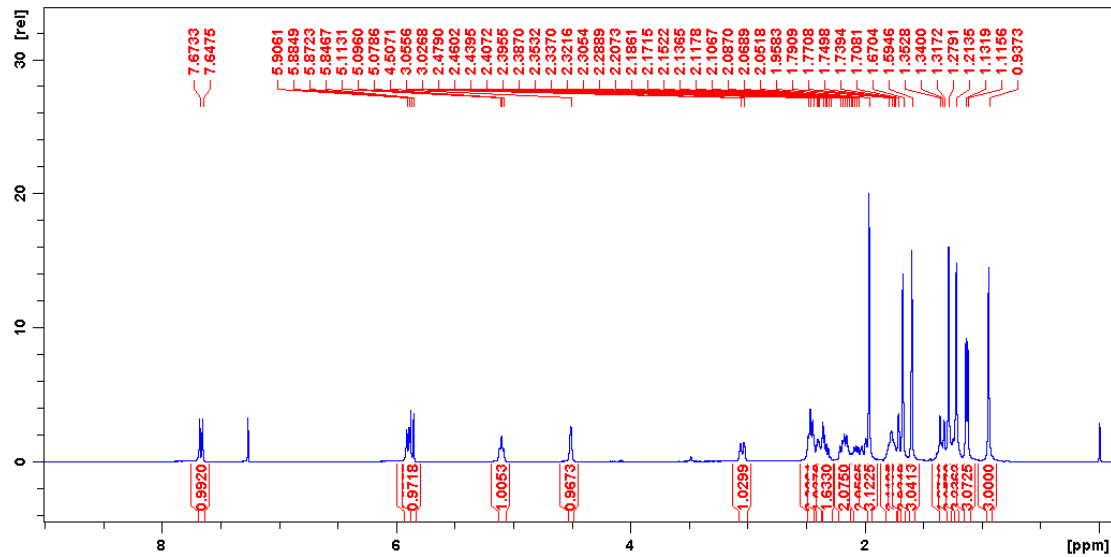

C

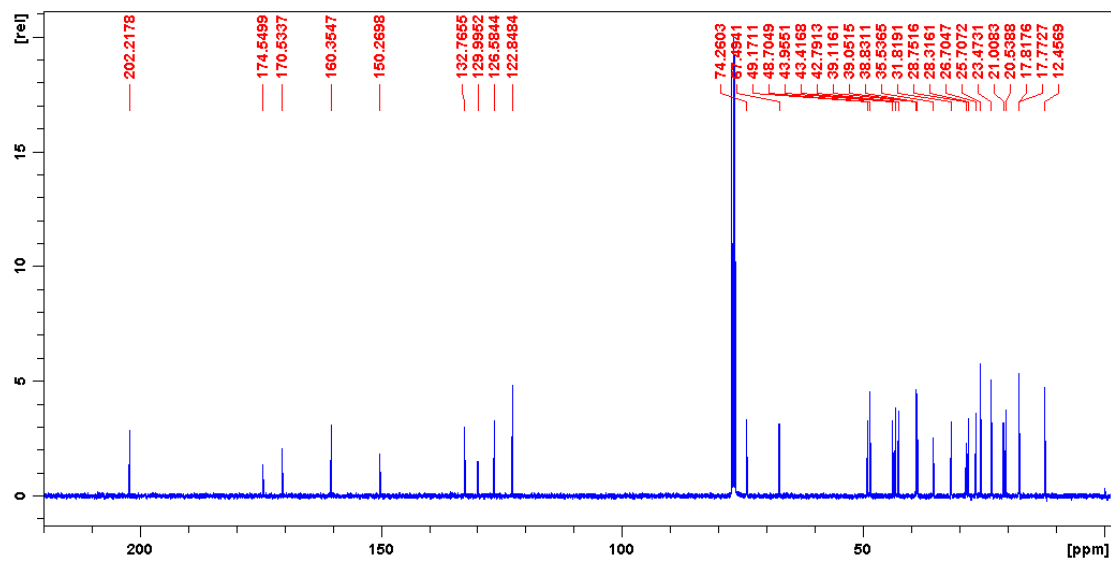

D

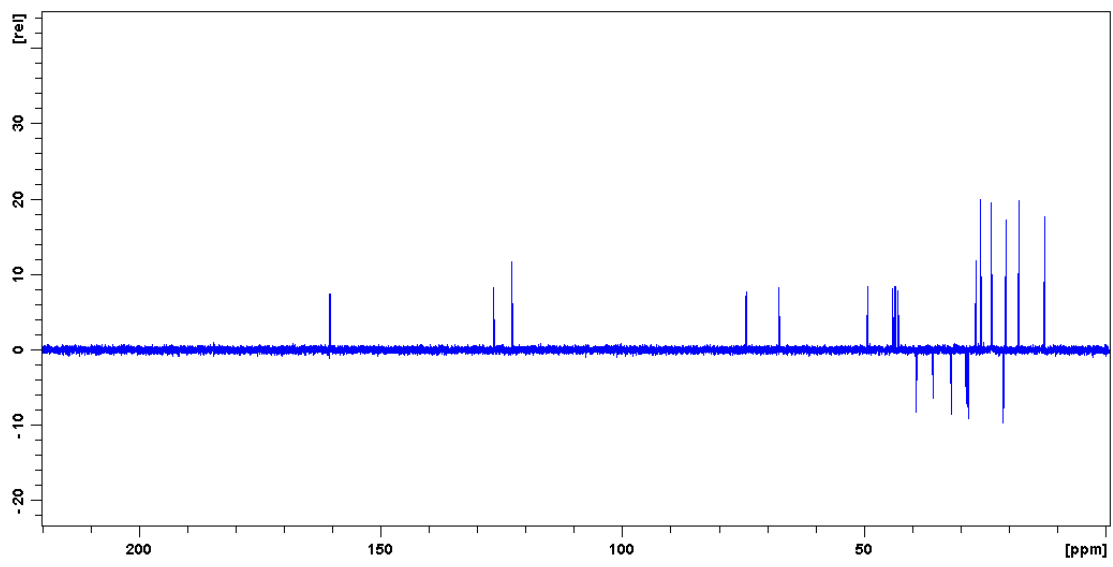

E

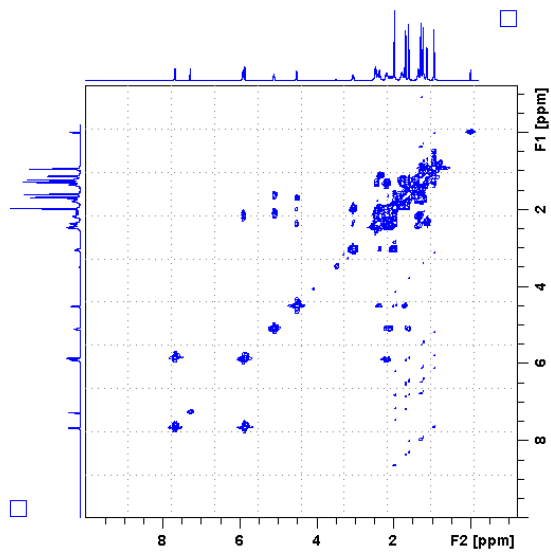

F

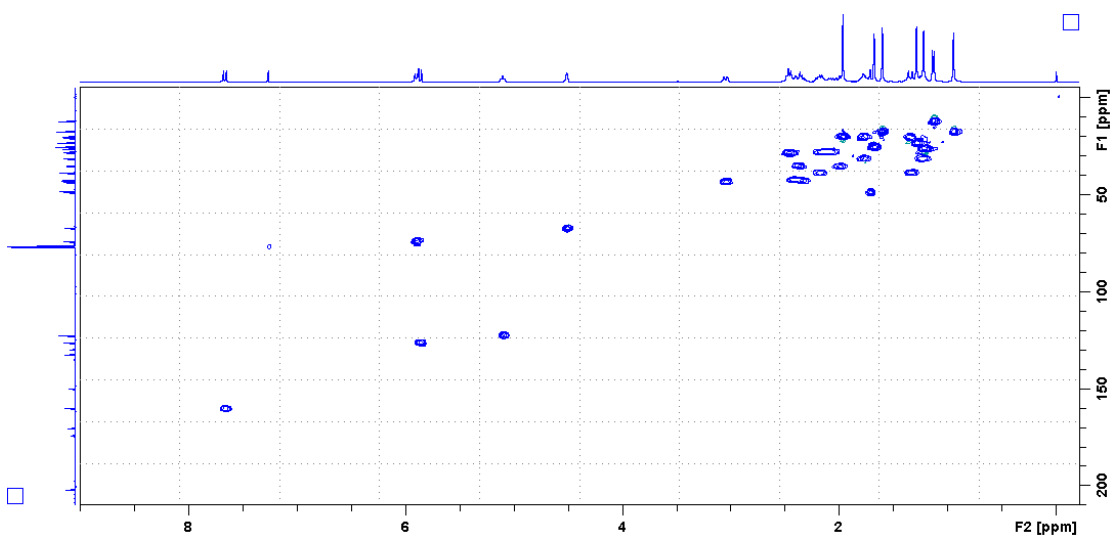

G

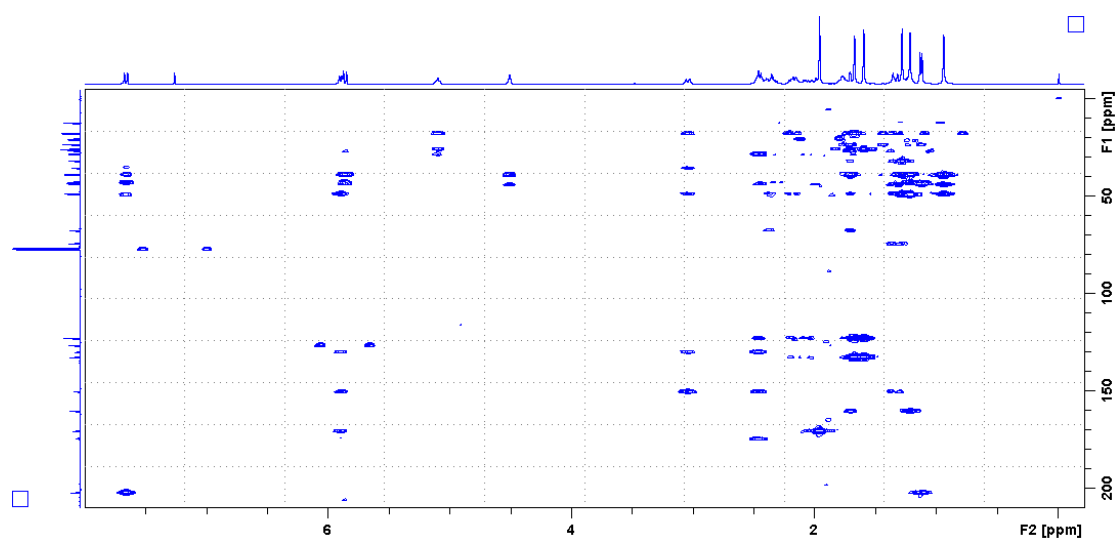

H

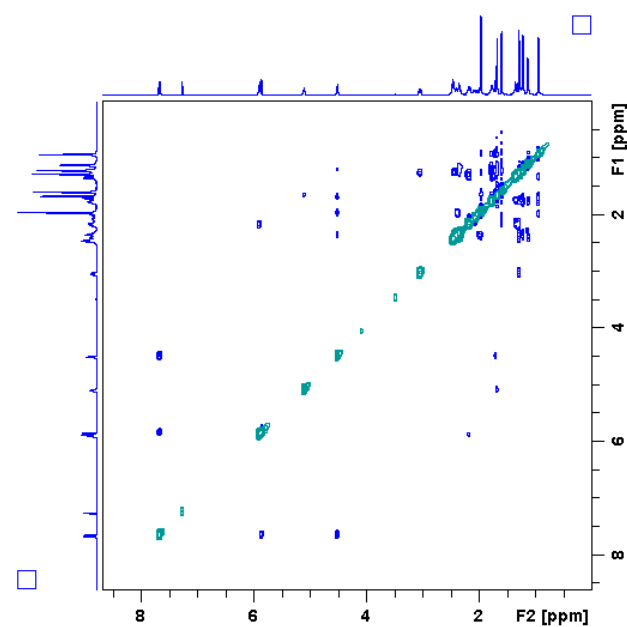

**Figure S3** HRESIMS and NMR spectra of **5**.

(A) HRESIMS spectrum; (B)  $^1\text{H}$  NMR spectrum in  $\text{CDCl}_3$  at 400 MHz; (C)  $^{13}\text{C}$  NMR spectrum in  $\text{CDCl}_3$  at 100 MHz; (D) DEPT 135 spectrum in  $\text{CDCl}_3$  at 100 MHz; (E)  $^1\text{H}$ - $^1\text{H}$  COSY spectrum in  $\text{CDCl}_3$  at 400 MHz; (F) HSQC spectrum in  $\text{CDCl}_3$  at 400 MHz; (G) HMBC spectrum in  $\text{CDCl}_3$  at 400 MHz; (H) ROESY spectrum in  $\text{CDCl}_3$  at 400 MHz.

A

Monoisotopic Mass, Even Electron Ions  
 198 formula(e) evaluated with 2 results within limits (up to 50 closest results for each mass)  
 Elements Used:  
 C: 0-500 H: 0-1000 O: 0-200 Na: 0-1  
 52  
 20190107\_57\_270 (2.177)

1: TOF MS ES+  
 1.20e+005

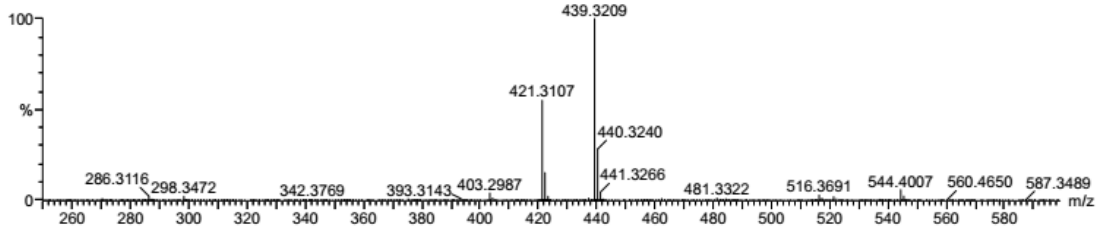

| Mass     | Calc. Mass | mDa  | PPM  | DBE | i-FIT | Norm  | Conf (%) | Formula       |
|----------|------------|------|------|-----|-------|-------|----------|---------------|
| 439.3209 | 439.3212   | -0.3 | -0.7 | 8.5 | 272.4 | 1.575 | 20.70    | C29 H43 O3    |
|          | 439.3188   | 2.1  | 4.8  | 5.5 | 271.1 | 0.232 | 79.30    | C27 H44 O3 Na |

B

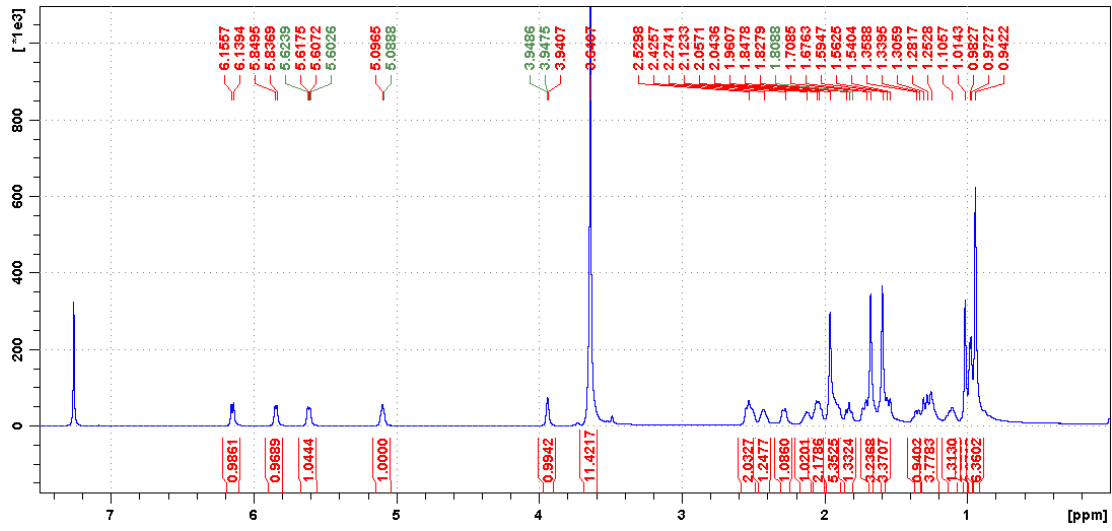

C

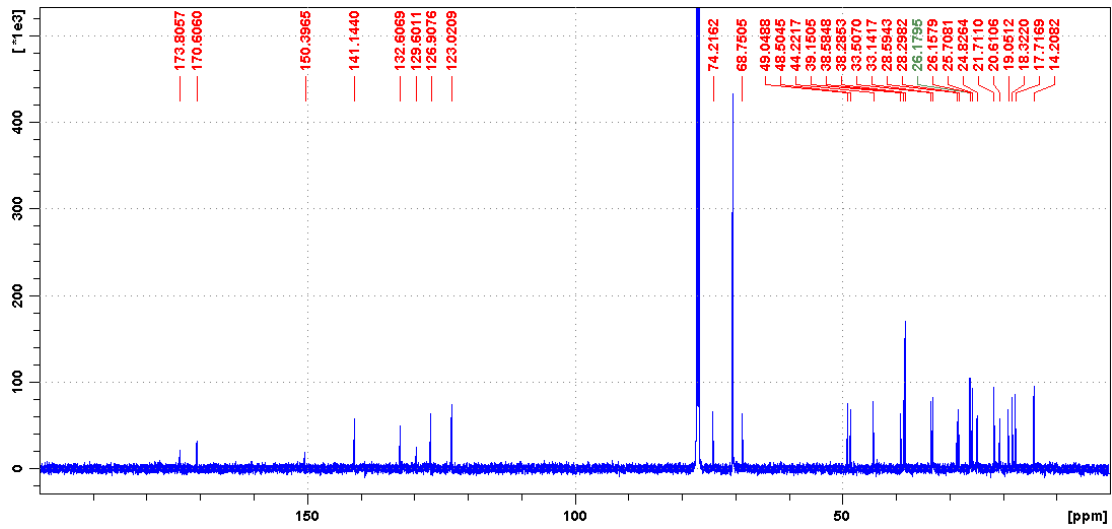

D

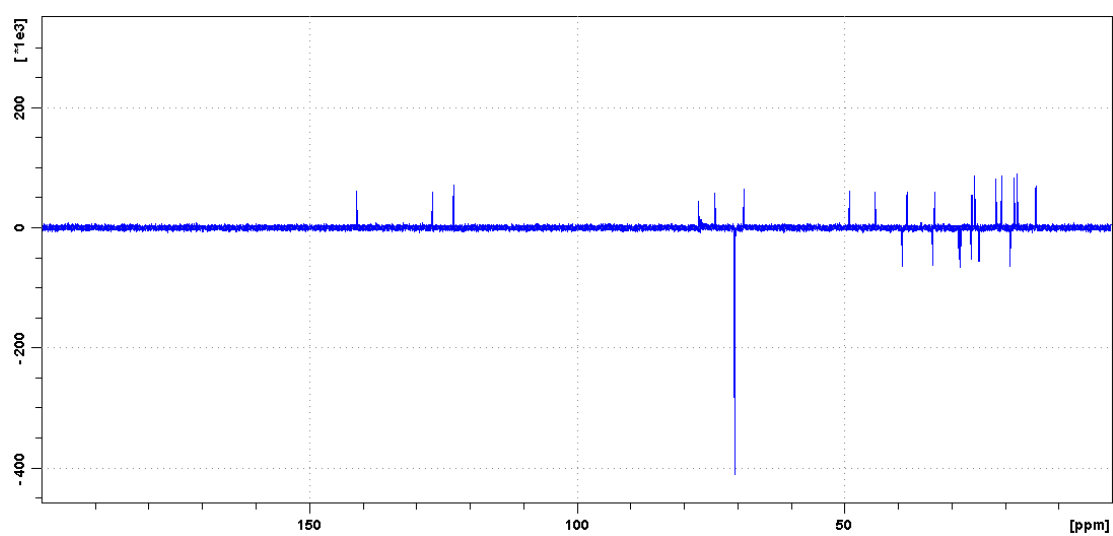

E

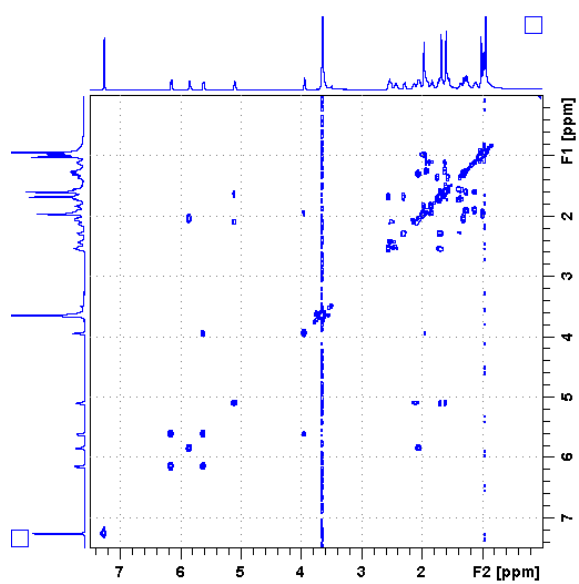

F

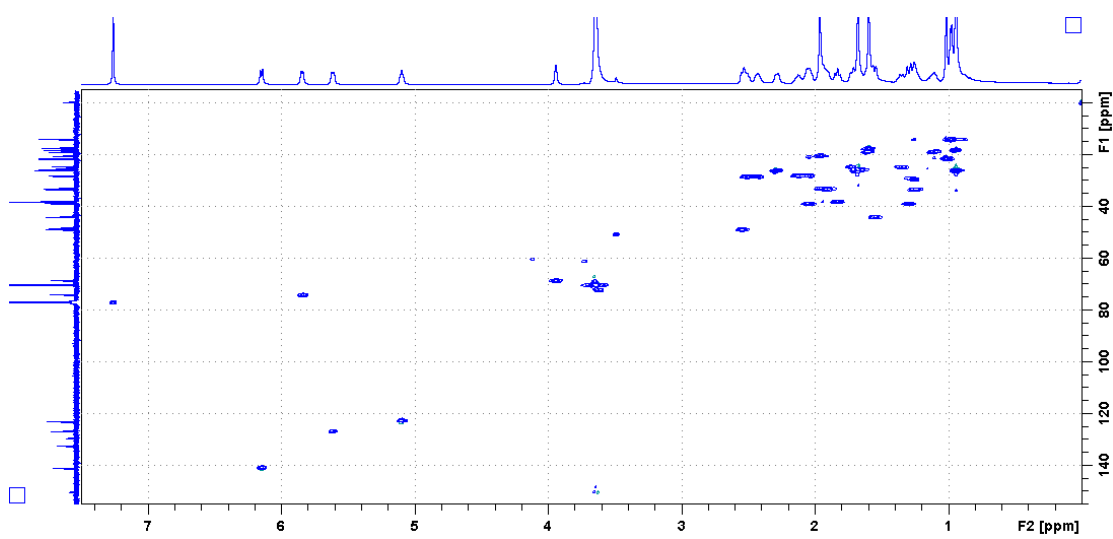

G

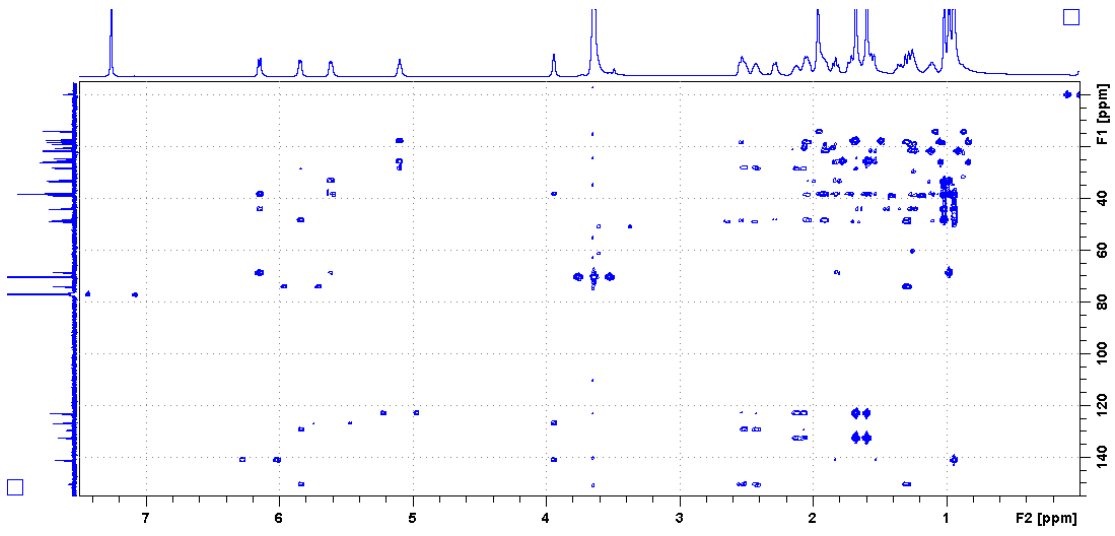

H

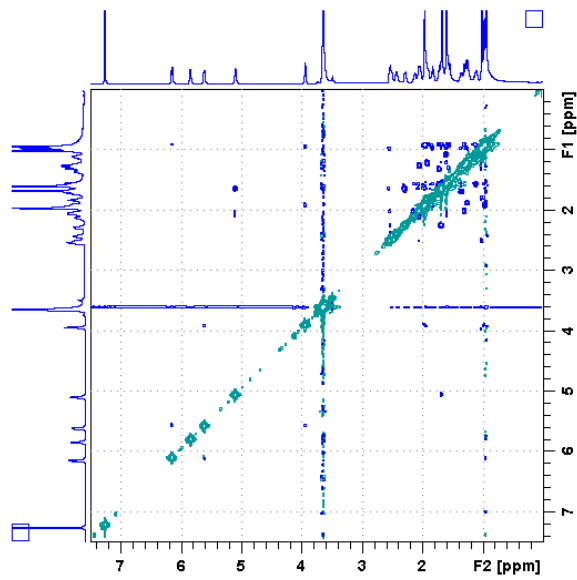

I

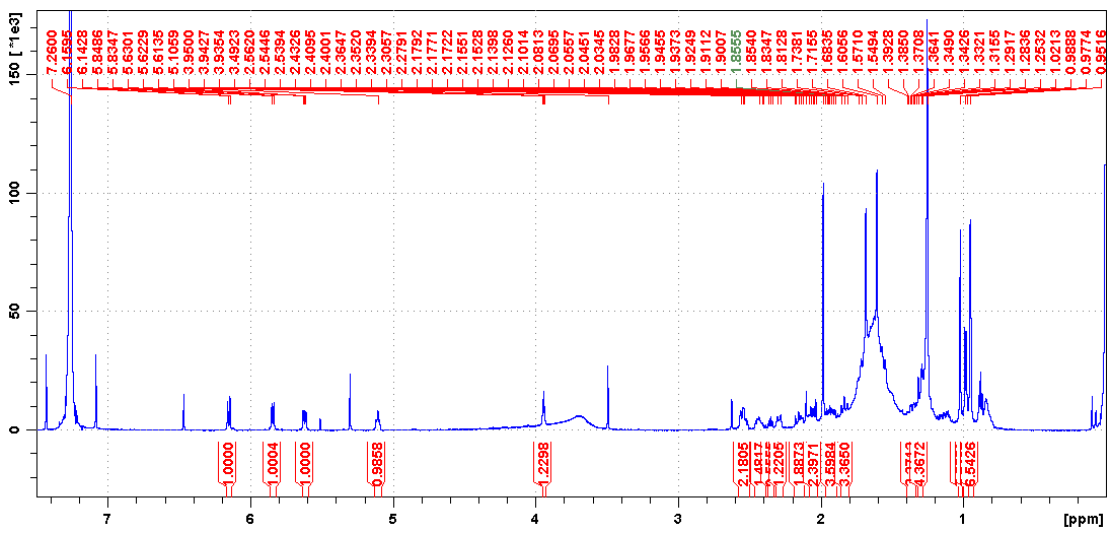

**Figure S4** HRESIMS and NMR spectra of **6**.

(A) HRESIMS spectrum; (B)  $^1\text{H}$  NMR spectrum in  $\text{CDCl}_3$  at 600 MHz; (C)  $^{13}\text{C}$  NMR spectrum in  $\text{CDCl}_3$  at 150 MHz; (D) DEPT 135 spectrum in  $\text{CDCl}_3$  at 150 MHz; (E)  $^1\text{H}$ - $^1\text{H}$  COSY spectrum in  $\text{CDCl}_3$  at 600 MHz; (F) HSQC spectrum in  $\text{CDCl}_3$  at 600 MHz; (G) HMBC spectrum in  $\text{CDCl}_3$  at 600 MHz; (H) NOESY spectrum in  $\text{CDCl}_3$  at 600 MHz; (I)  $^1\text{H}$  NMR spectrum of **6** obtained *via* chemical derivatization in  $\text{CDCl}_3$  at 600 MHz.

A

Monoisotopic Mass, Even Electron Ions

295 formula(e) evaluated with 2 results within limits (up to 50 closest results for each mass)

Elements Used:

C: 0-500 H: 0-1000 O: 0-200 Na: 0-1

53

20190107\_58 214 (1.724)

1: TOF MS ES+  
1.64e+004

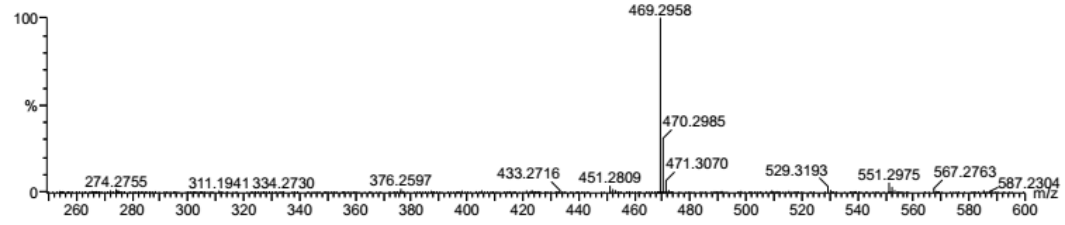

Minimum: -1.5  
Maximum: 50.0

| Mass     | Calc. Mass | mDa  | PPM  | DBE  | i-FIT | Norm  | Conf (%) | Formula       |
|----------|------------|------|------|------|-------|-------|----------|---------------|
| 551.2975 | 551.2985   | -1.0 | -1.8 | 9.5  | 33.3  | 1.067 | 34.42    | C31 H44 O7 Na |
|          | 551.2950   | 2.5  | 4.5  | 21.5 | 32.6  | 0.422 | 65.58    | C40 H39 O2    |

B

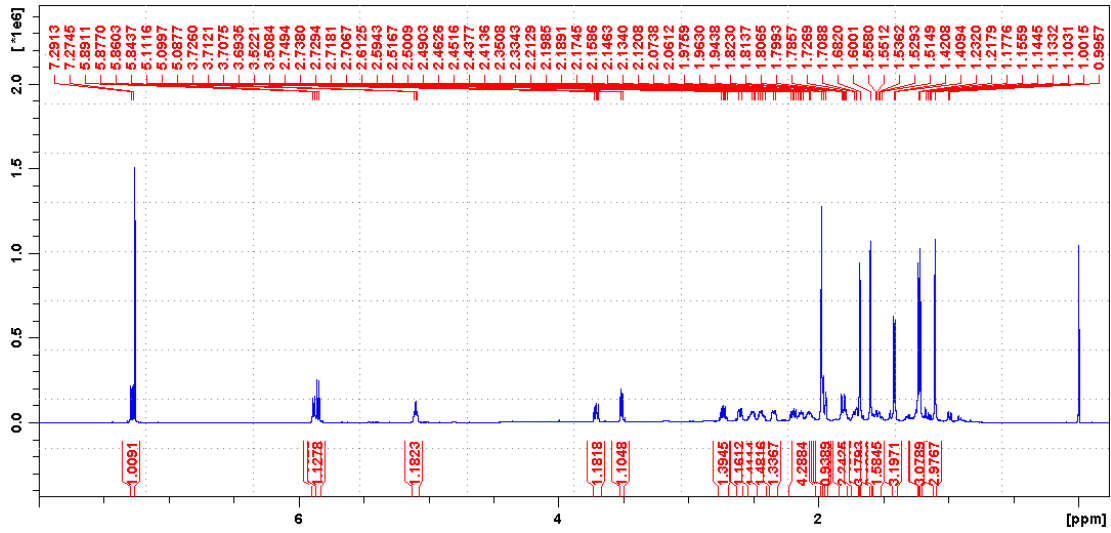

C

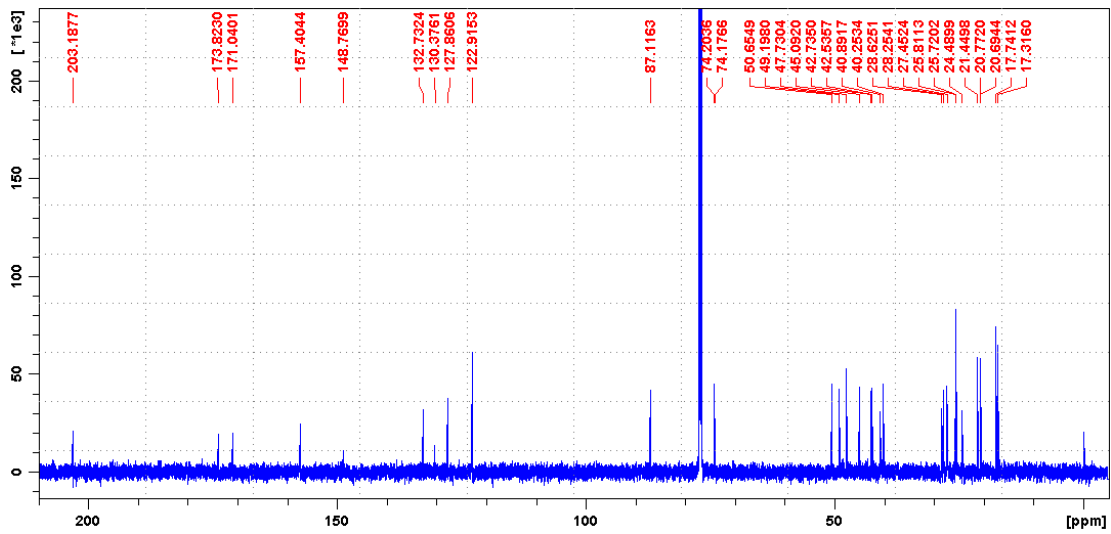



D

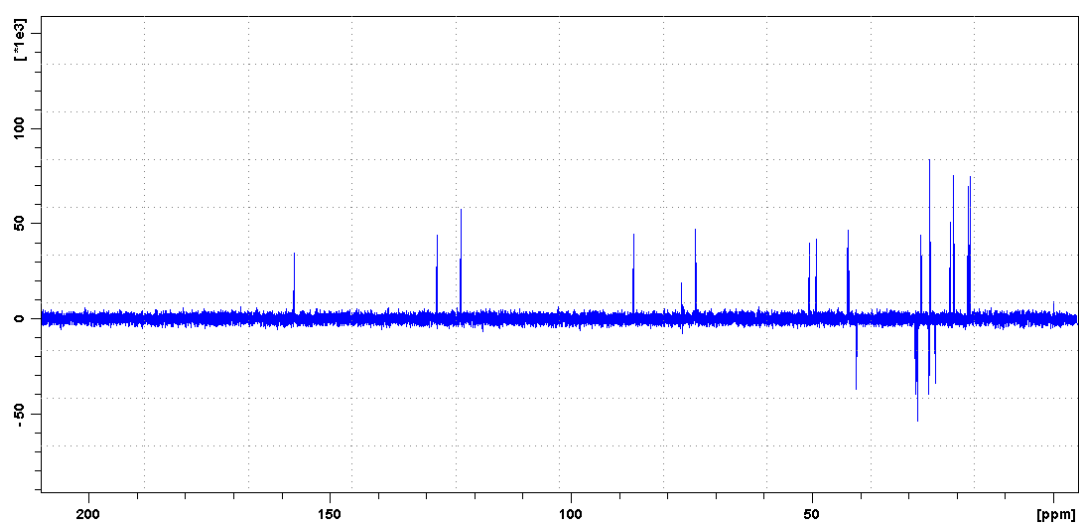

E

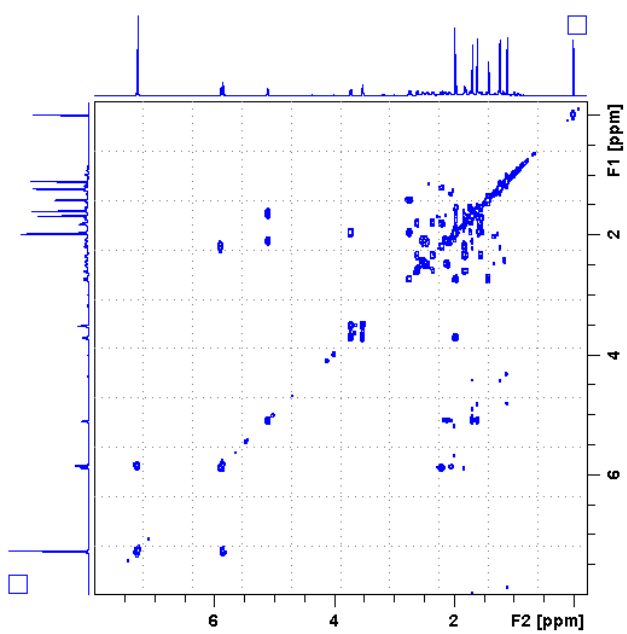

F

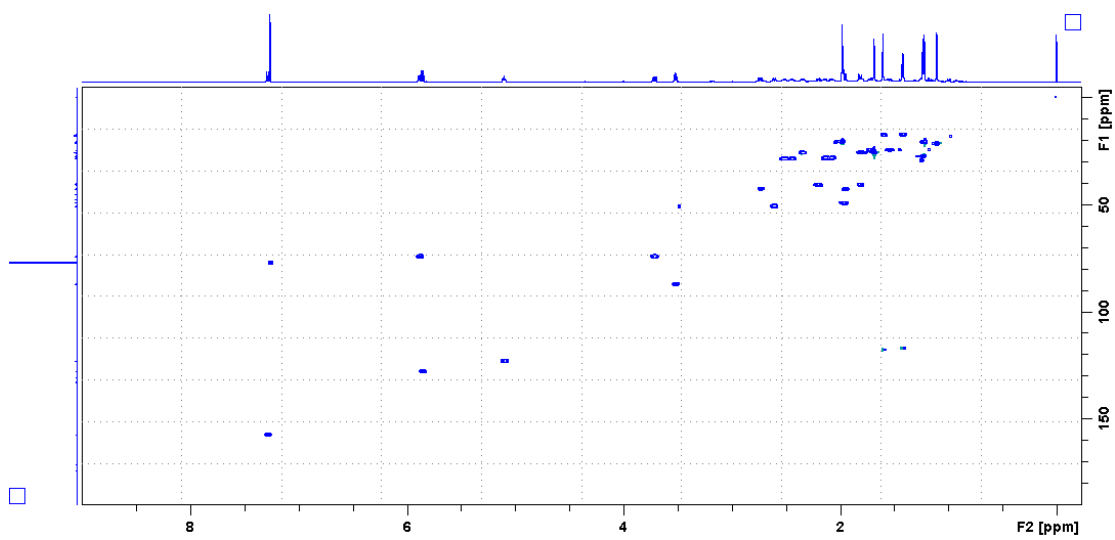

G

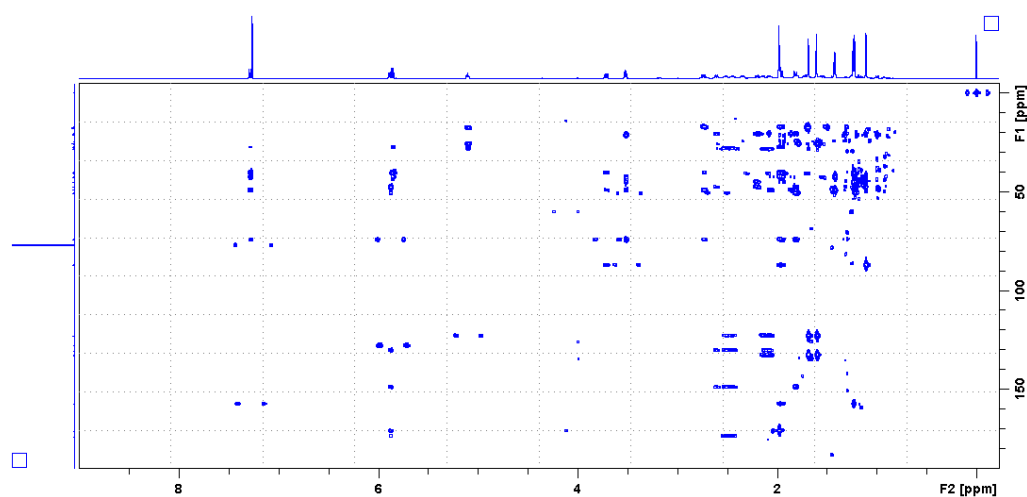

H

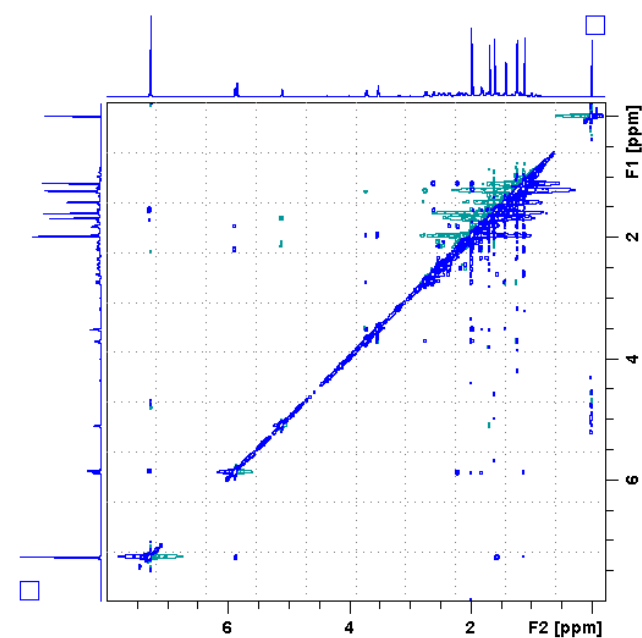

**Figure S5** HRESIMS and NMR spectra of **9**.

(A) HRESIMS spectrum; (B)  $^1\text{H}$  NMR spectrum in  $\text{CDCl}_3$  at 600 MHz; (C)  $^{13}\text{C}$  NMR spectrum in  $\text{CDCl}_3$  at 150 MHz; (D) DEPT 135 spectrum in  $\text{CDCl}_3$  at 150 MHz; (E)  $^1\text{H}$ - $^1\text{H}$  COSY spectrum in  $\text{CDCl}_3$  at 600 MHz; (F) HSQC spectrum in  $\text{CDCl}_3$  at 600 MHz; (G) HMBC spectrum in  $\text{CDCl}_3$  at 600 MHz; (H) NOESY spectrum in  $\text{CDCl}_3$  at 600 MHz.A

Monoisotopic Mass, Even Electron Ions  
 248 formula(e) evaluated with 1 results within limits (up to 50 closest results for each mass)  
 Elements Used:  
 C: 0-500 H: 0-1000 O: 0-200 Na: 0-1  
 54  
 20190107\_59 219 (1.773)

1: TOF MS ES+  
 9.85e+004

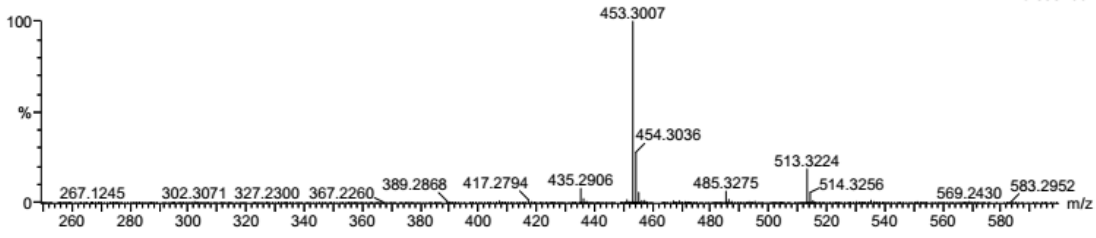

| Mass     | Calc. Mass | mDa | PPM | DBE | i-FIT | Norm | Conf (%) | Formula    |
|----------|------------|-----|-----|-----|-------|------|----------|------------|
| 513.3224 | 513.3216   | 0.8 | 1.6 | 9.5 | 143.4 | n/a  | n/a      | C31 H45 O6 |

B

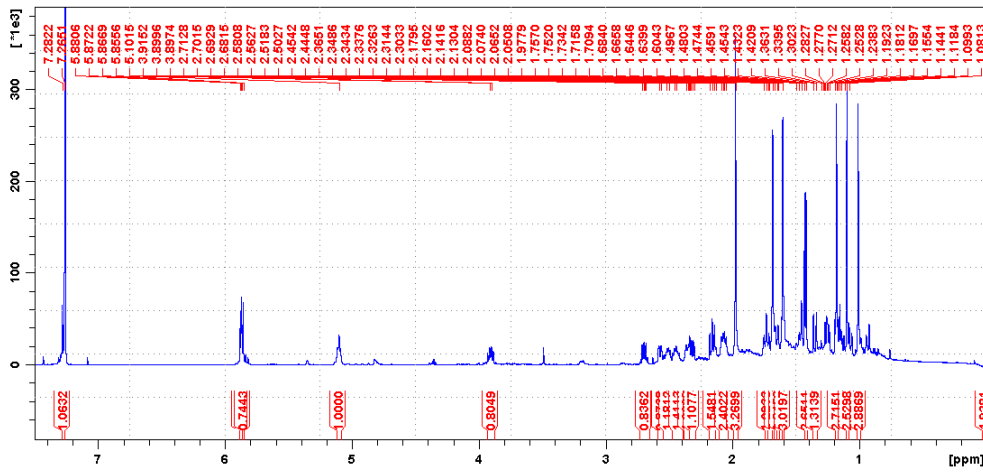

C

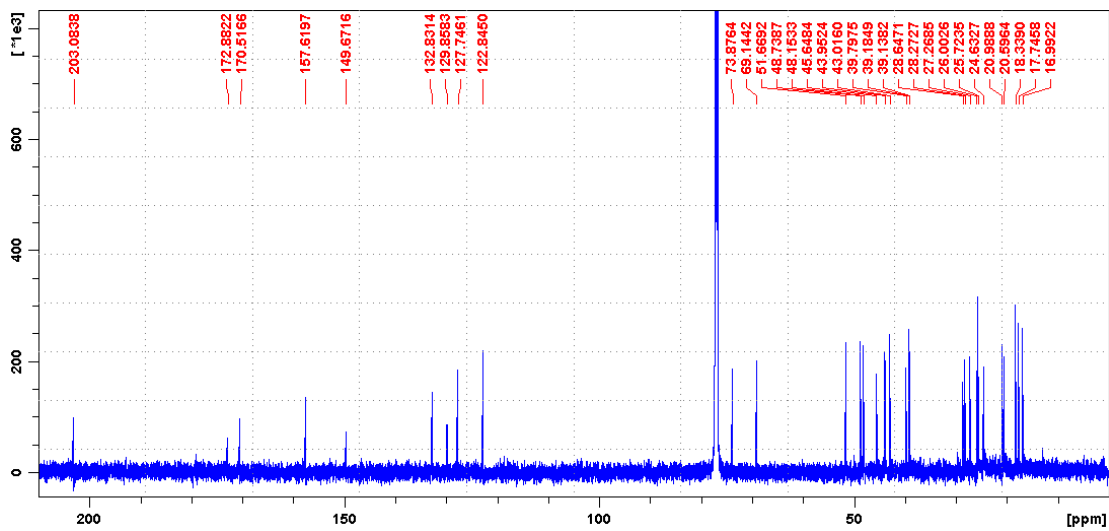

D

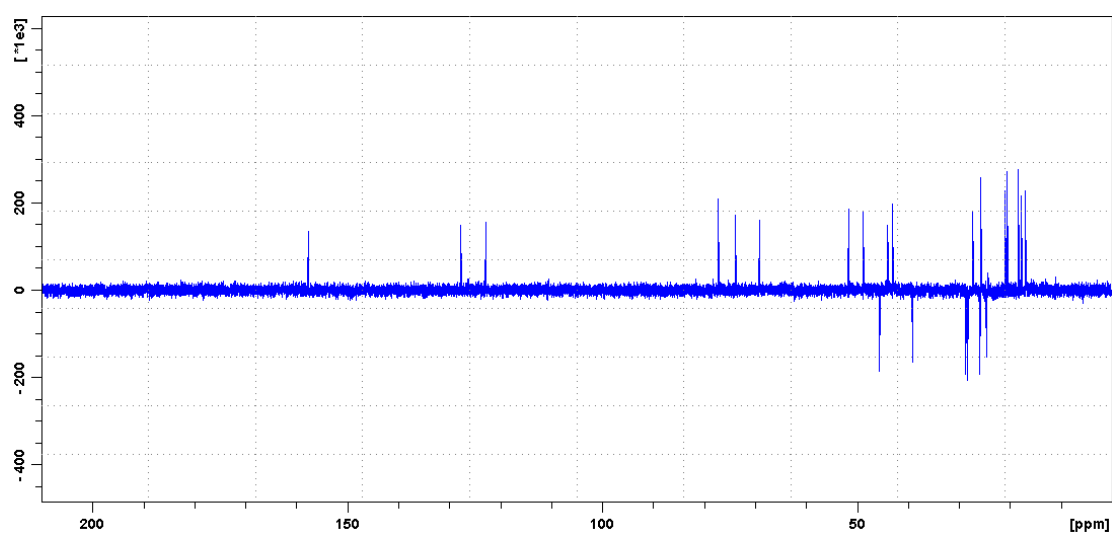

E

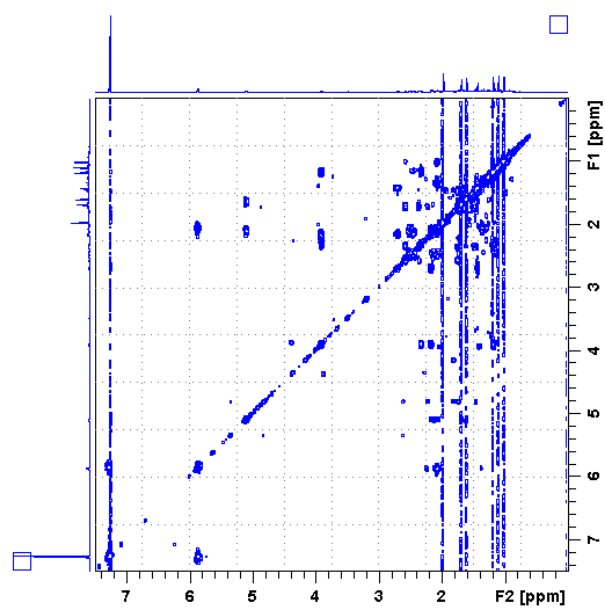

F

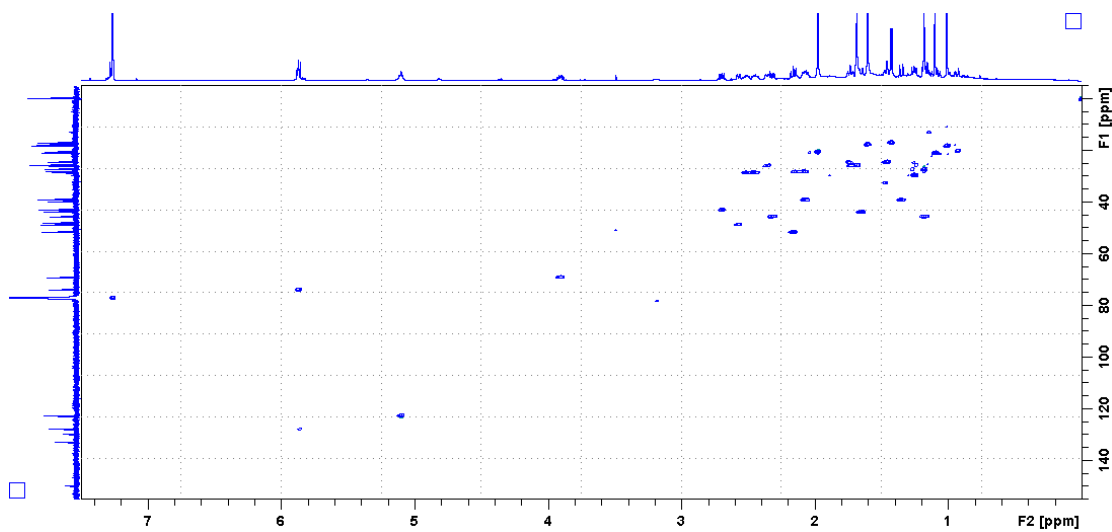

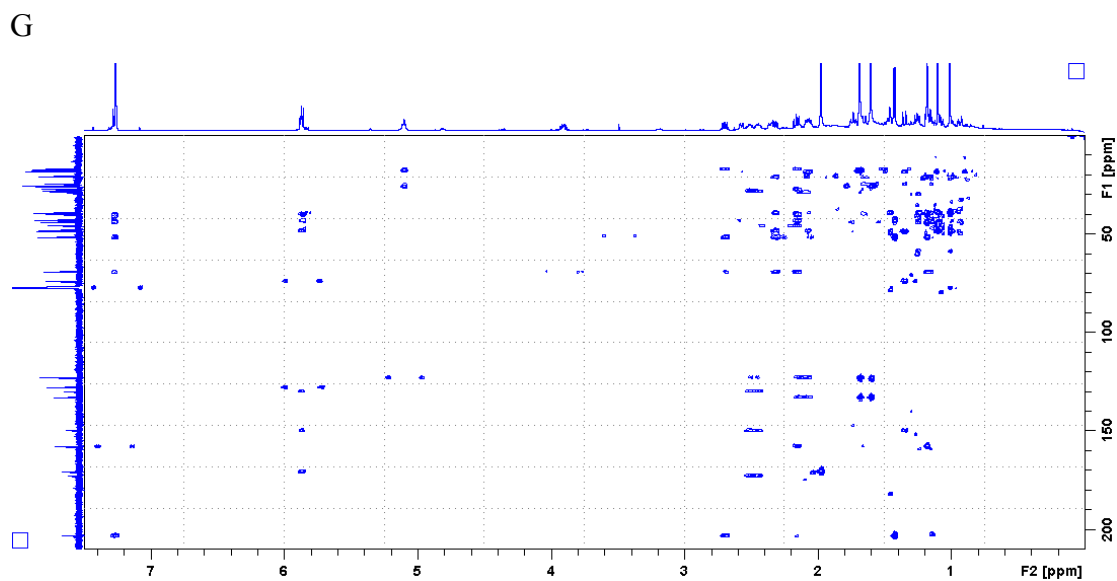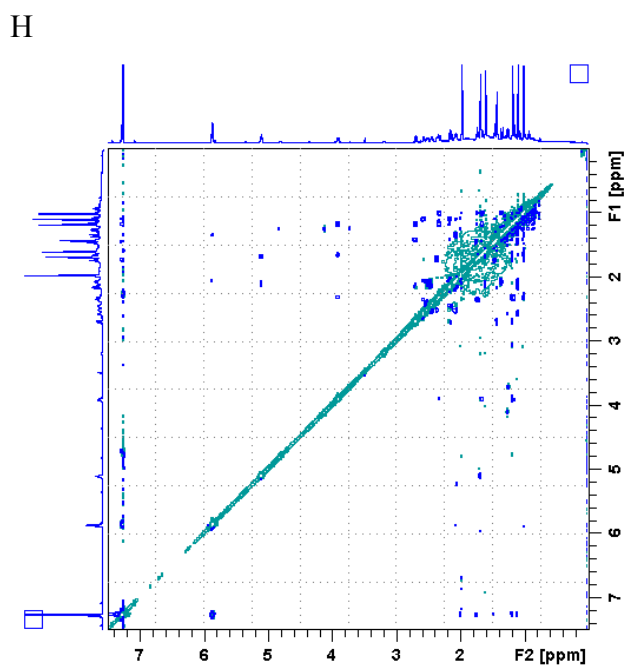

**Figure S6** HRESIMS and NMR spectra of **10**.

(A) HRESIMS spectrum; (B)  $^1\text{H}$  NMR spectrum in  $\text{CDCl}_3$  at 600 MHz; (C)  $^{13}\text{C}$  NMR spectrum in  $\text{CDCl}_3$  at 150 MHz; (D) DEPT 135 spectrum in  $\text{CDCl}_3$  at 150 MHz; (E)  $^1\text{H}$ - $^1\text{H}$  COSY spectrum in  $\text{CDCl}_3$  at 600 MHz; (F) HSQC spectrum in  $\text{CDCl}_3$  at 600 MHz; (G) HMBC spectrum in  $\text{CDCl}_3$  at 600 MHz; (H) NOESY spectrum in  $\text{CDCl}_3$  at 600 MHz.

A

Monoisotopic Mass, Even Electron Ions  
 248 formula(e) evaluated with 2 results within limits (up to 50 closest results for each mass)  
 Elements Used:  
 C: 0-500 H: 0-1000 O: 0-200 Na: 0-1  
 EB4C1-6-3-1  
 20190902-25 233 (1.877)

1: TOF MS ES+  
 6.26e+04

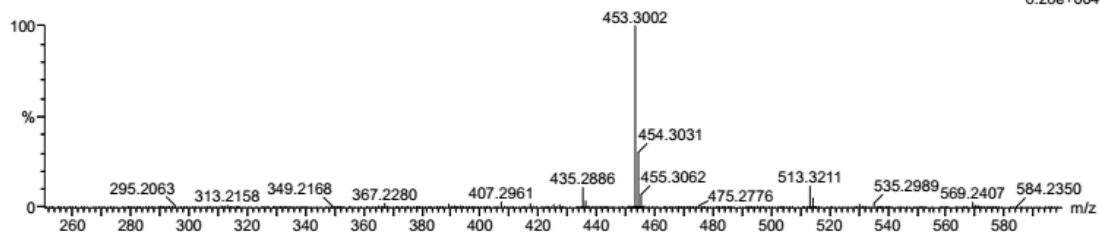

| Mass     | Calc. Mass | mDa  | PPM  | DBE | i-FIT | Norm  | Conf (%) | Formula       |
|----------|------------|------|------|-----|-------|-------|----------|---------------|
| 513.3211 | 513.3216   | -0.5 | -1.0 | 9.5 | 133.1 | 0.429 | 65.13    | C31 H45 O6    |
|          | 513.3192   | 1.9  | 3.7  | 6.5 | 133.7 | 1.053 | 34.87    | C29 H46 O6 Na |

B

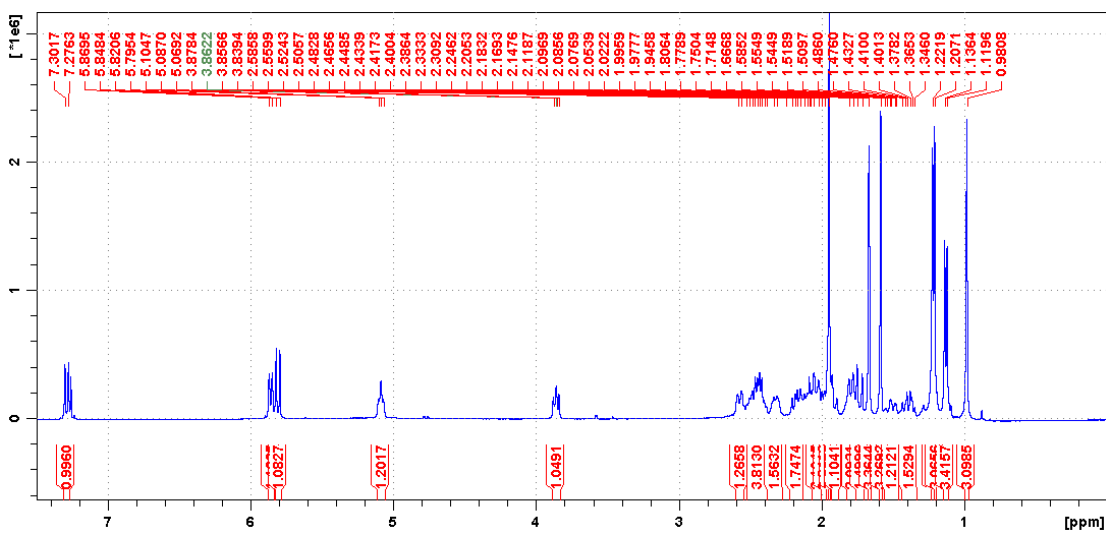

C

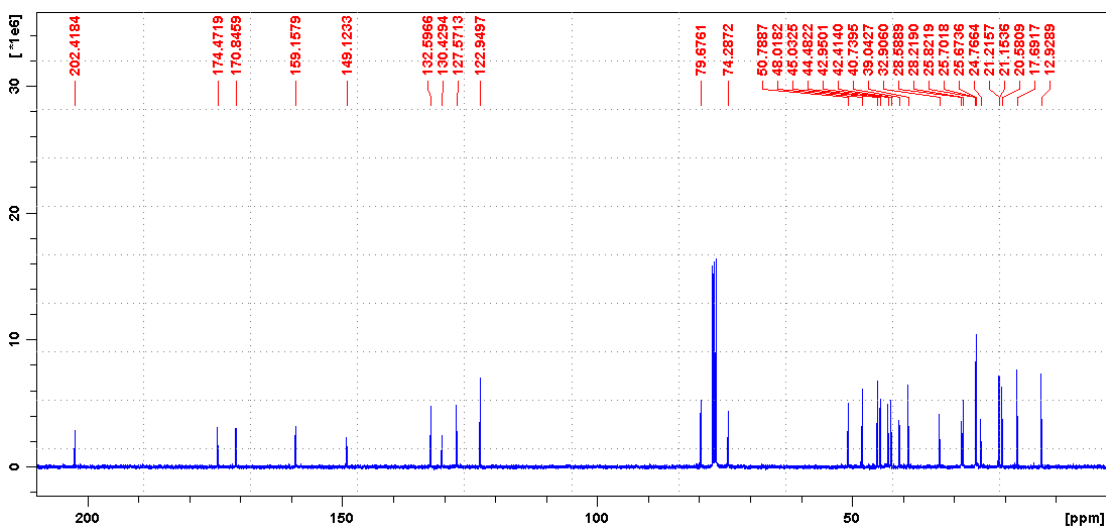

D

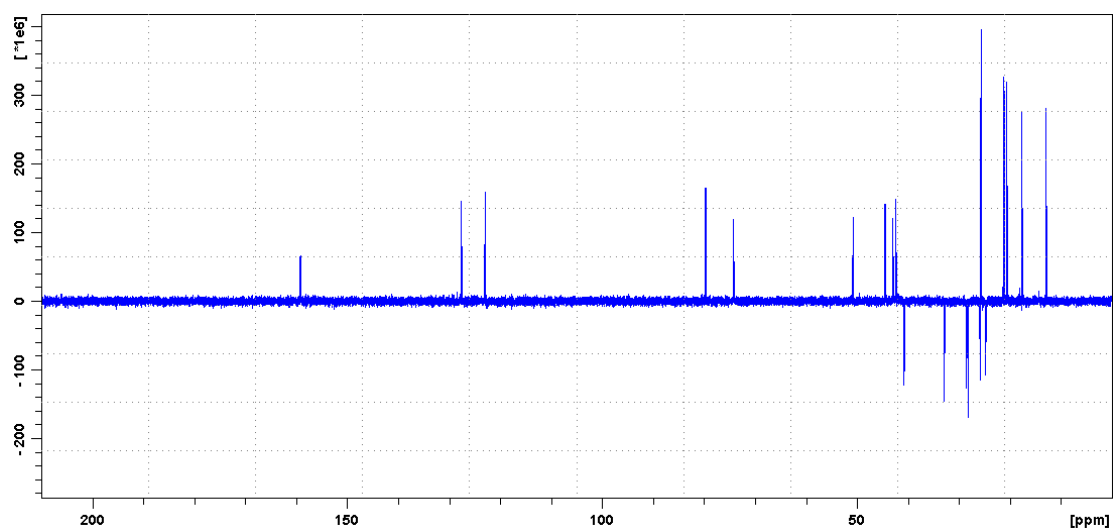

E

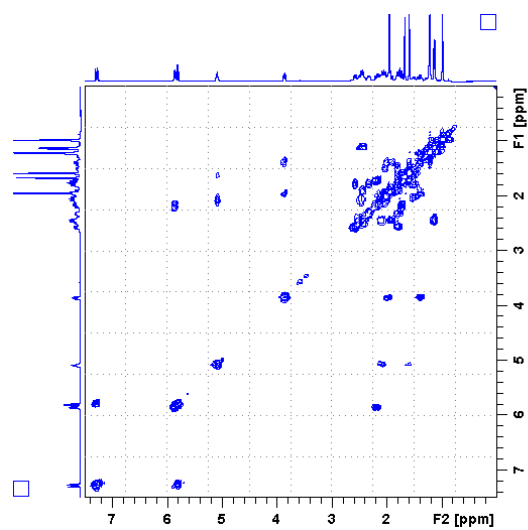

F

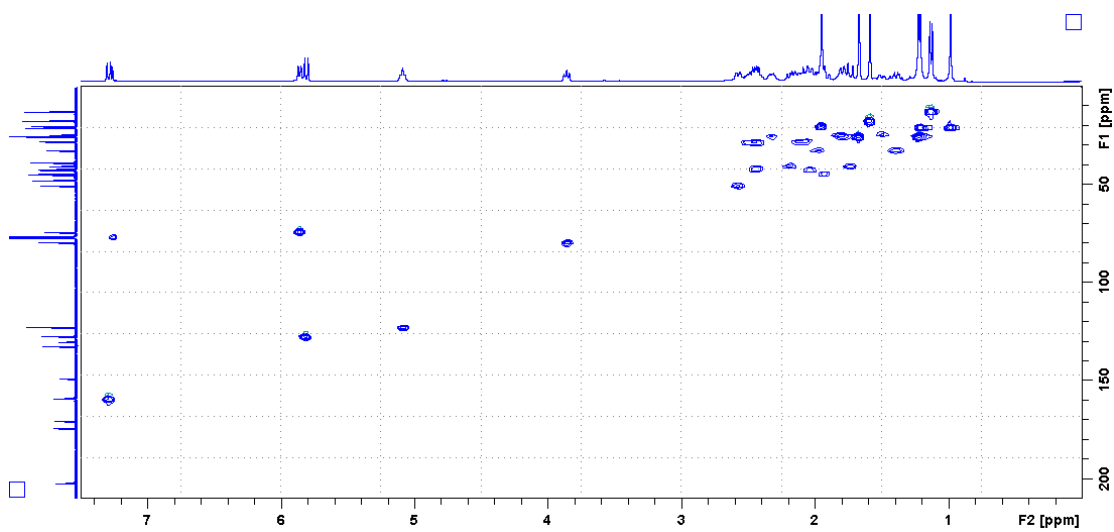

G

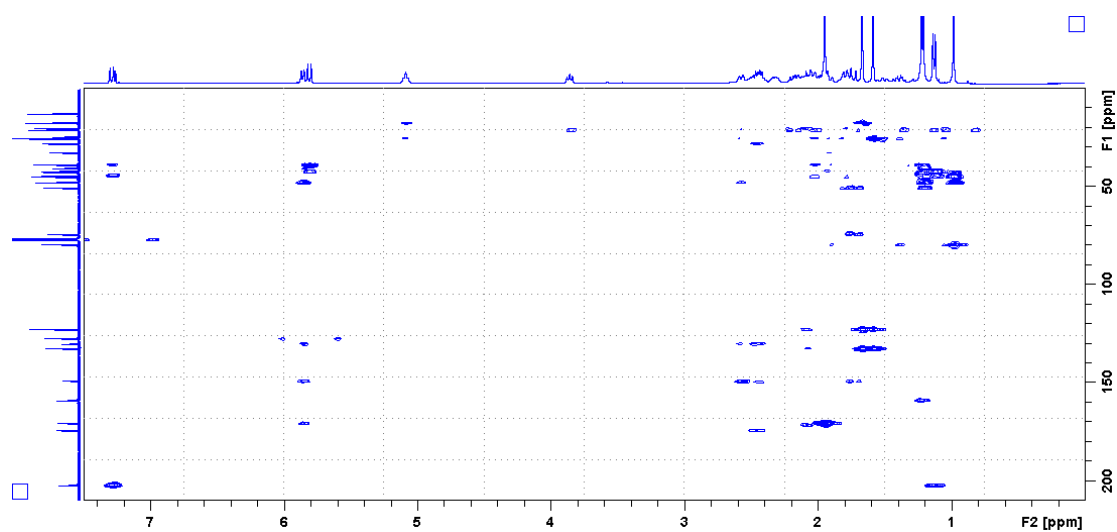

H

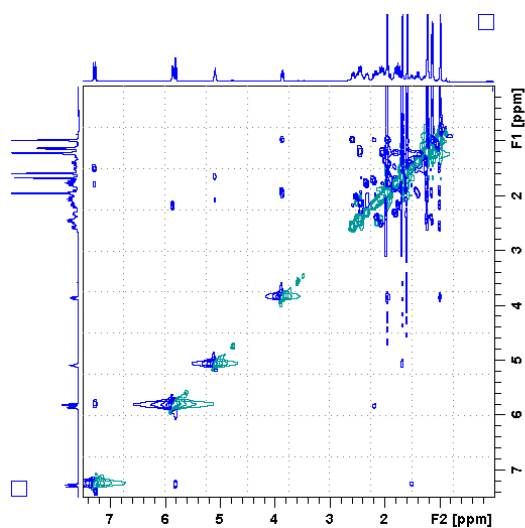

**Figure S7** HRESIMS and NMR spectra of **11**.

(A) HRESIMS spectrum; (B)  $^1\text{H}$  NMR spectrum in  $\text{CDCl}_3$  at 400 MHz; (C)  $^{13}\text{C}$  NMR spectrum in  $\text{CDCl}_3$  at 100 MHz; (D) DEPT 135 spectrum in  $\text{CDCl}_3$  at 100 MHz; (E)  $^1\text{H}$ - $^1\text{H}$  COSY spectrum in  $\text{CDCl}_3$  at 400 MHz; (F) HSQC spectrum in  $\text{CDCl}_3$  at 400 MHz; (G) HMBC spectrum in  $\text{CDCl}_3$  at 400 MHz; (H) ROESY spectrum in  $\text{CDCl}_3$  at 400 MHz.



A

Monoisotopic Mass, Even Electron Ions  
 300 formula(e) evaluated with 2 results within limits (up to 50 closest results for each mass)  
 Elements Used:  
 C: 0-500 H: 0-200 O: 0-200 Na: 0-1  
 B1B4-1-2  
 2018052924 180 (1.459)

1: TOF MS ES+  
 5.32e+004

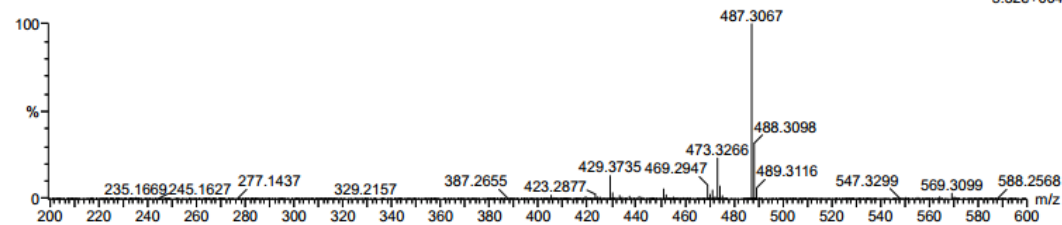

Minimum: -1.5  
 Maximum: 50.0

| Mass     | Calc. Mass | mDa  | PPM  | DBE  | i-FIT | Norm  | Conf (%) | Formula       |
|----------|------------|------|------|------|-------|-------|----------|---------------|
| 569.3099 | 569.3090   | 0.9  | 1.6  | 8.5  | 65.8  | 0.592 | 55.32    | C31 H46 O8 Na |
|          | 569.3114   | -1.5 | -2.6 | 11.5 | 66.0  | 0.806 | 44.68    | C33 H45 O8    |

B

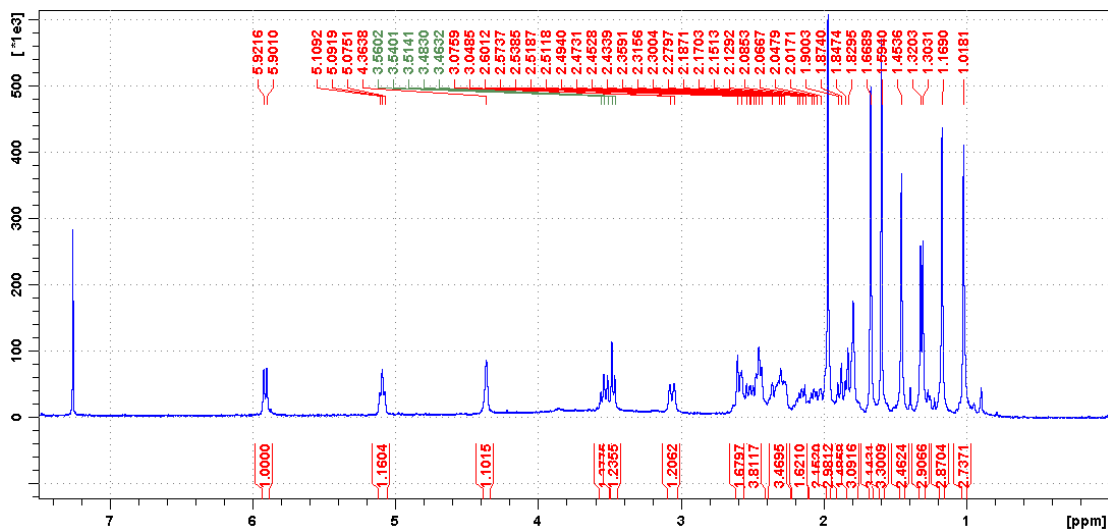

C

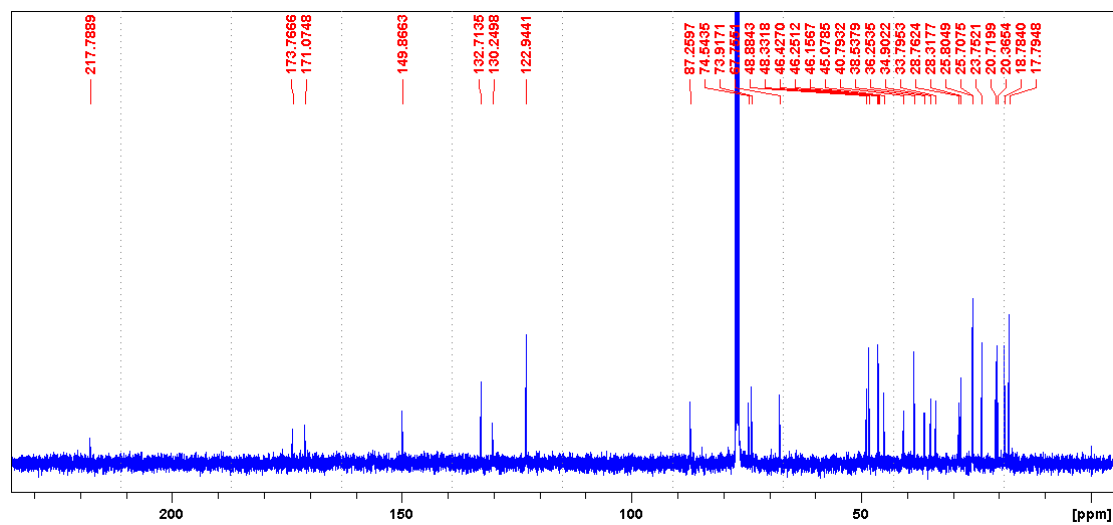

D

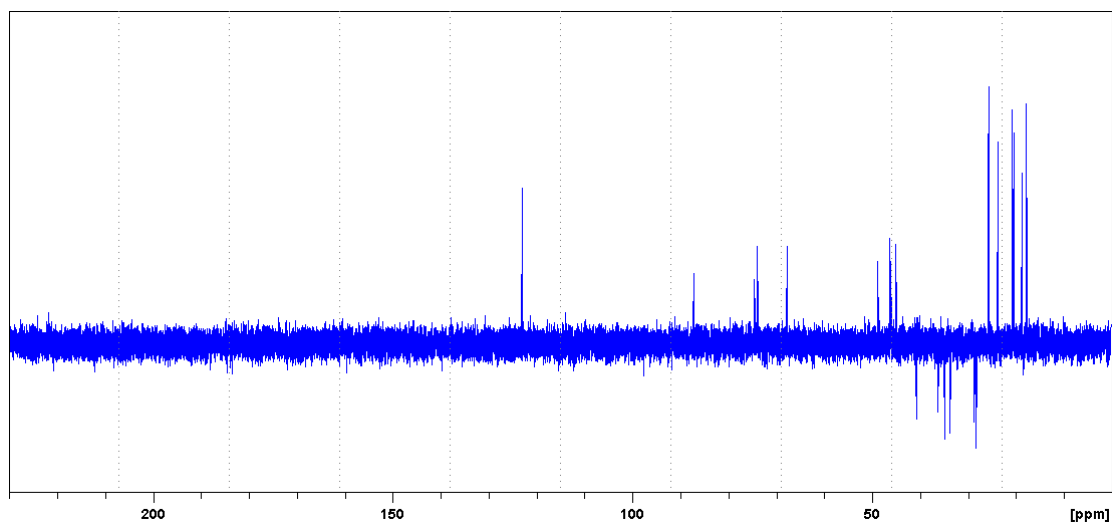

E

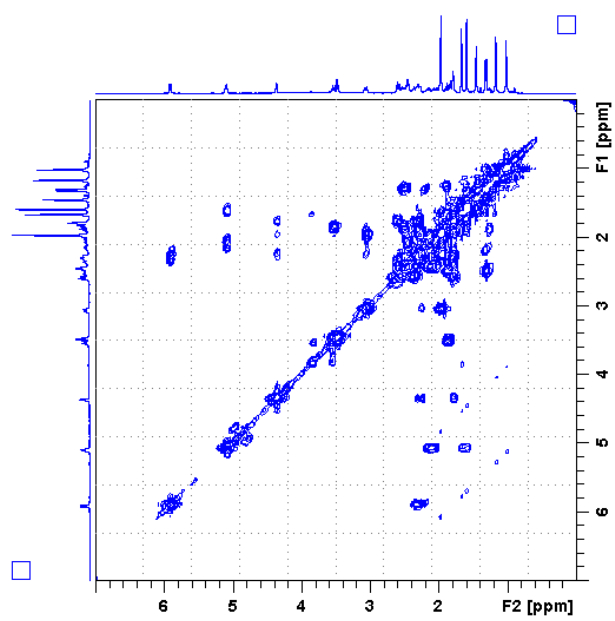

F

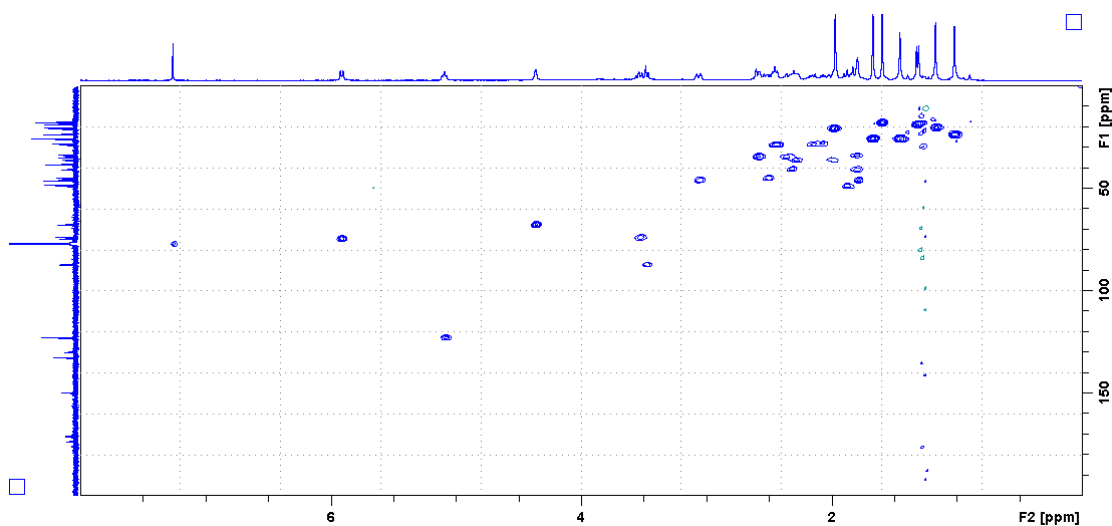

G

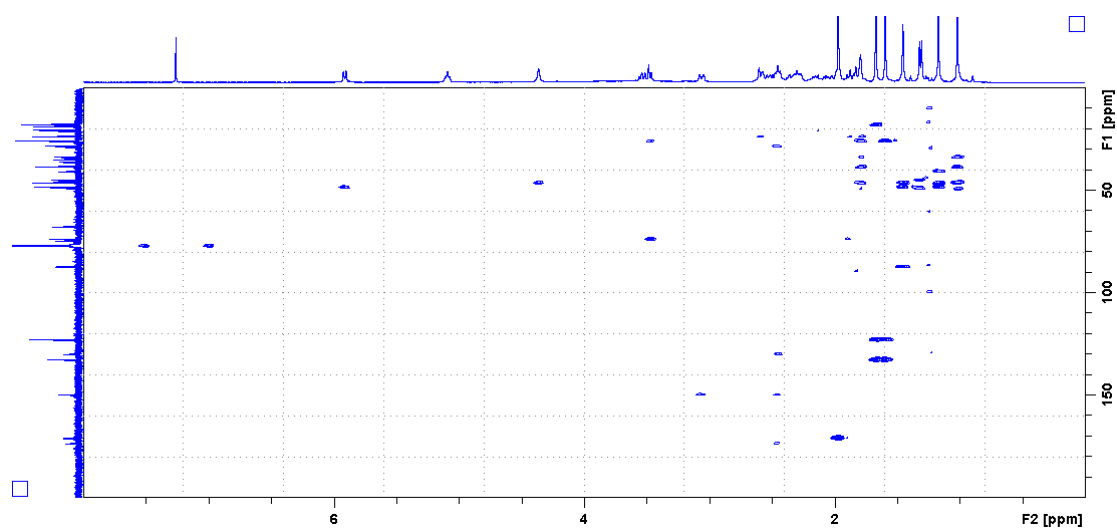

H

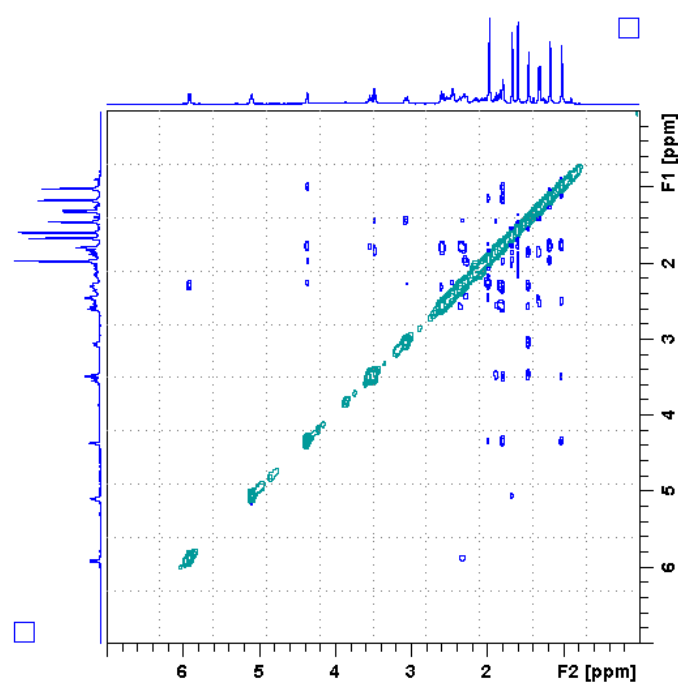

**Figure S8** HRESIMS and NMR spectra of **12**.

(A) HRESIMS spectrum; (B)  $^1\text{H}$  NMR spectrum in  $\text{CDCl}_3$  at 400 MHz; (C)  $^{13}\text{C}$  NMR spectrum in  $\text{CDCl}_3$  at 100 MHz; (D) DEPT 135 spectrum in  $\text{CDCl}_3$  at 100 MHz; (E)  $^1\text{H}$ - $^1\text{H}$  COSY spectrum in  $\text{CDCl}_3$  at 400 MHz; (F) HSQC spectrum in  $\text{CDCl}_3$  at 400 MHz; (G) HMBC spectrum in  $\text{CDCl}_3$  at 400 MHz; (H) ROESY spectrum in  $\text{CDCl}_3$  at 400 MHz.

A

Monoisotopic Mass, Even Electron Ions  
 298 formula(e) evaluated with 2 results within limits (up to 50 closest results for each mass)  
 Elements Used:  
 C: 0-500 H: 0-1000 O: 0-200 Na: 0-1  
 B1B4-1-3  
 2018052925 186 (1.504)

1: TOF MS ES+  
 1.33e+005

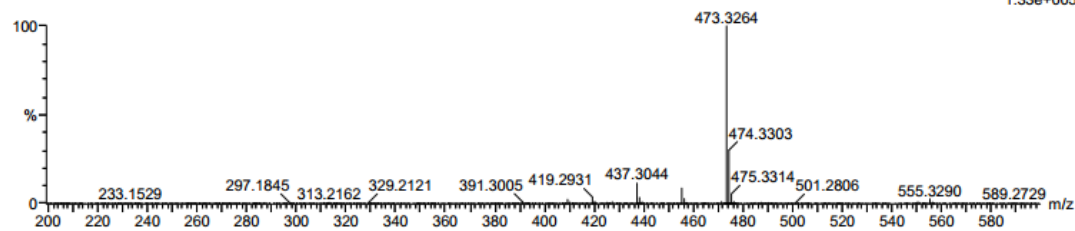

Minimum: -1.5  
 Maximum: 50.0

| Mass     | Calc. Mass | mDa  | PPM  | DBE  | i-FIT | Norm  | Conf (%) | Formula       |
|----------|------------|------|------|------|-------|-------|----------|---------------|
| 555.3290 | 555.3298   | -0.8 | -1.4 | 7.5  | 76.5  | 0.030 | 97.08    | C31 H48 O7 Na |
|          | 555.3263   | 2.7  | 4.9  | 19.5 | 80.0  | 3.534 | 2.92     | C40 H43 O2    |

B

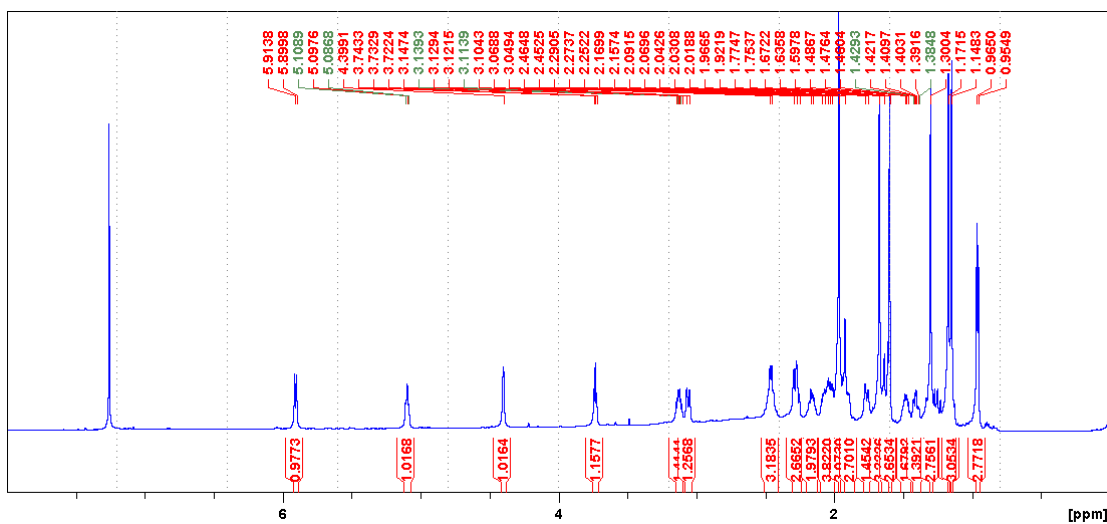

C

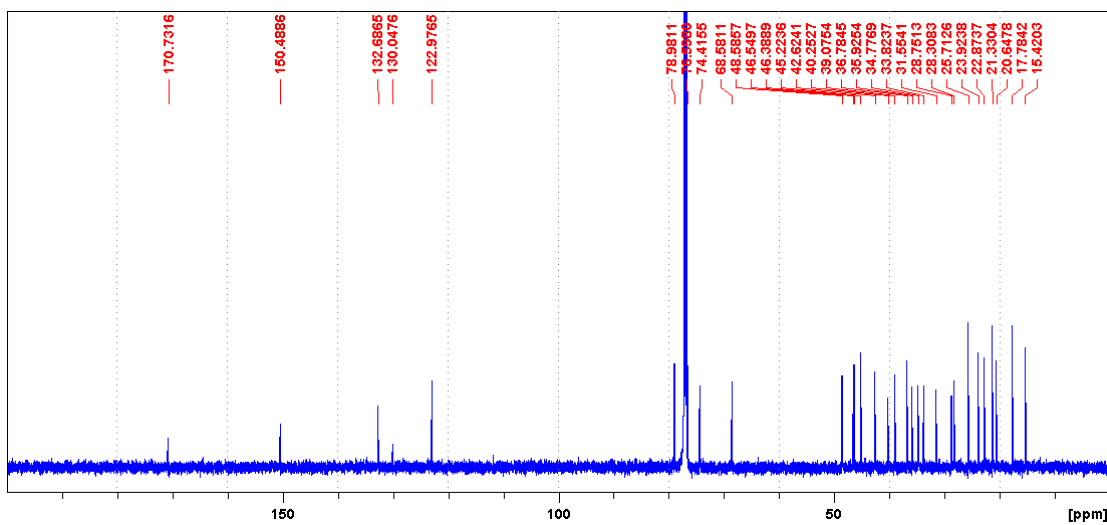

D

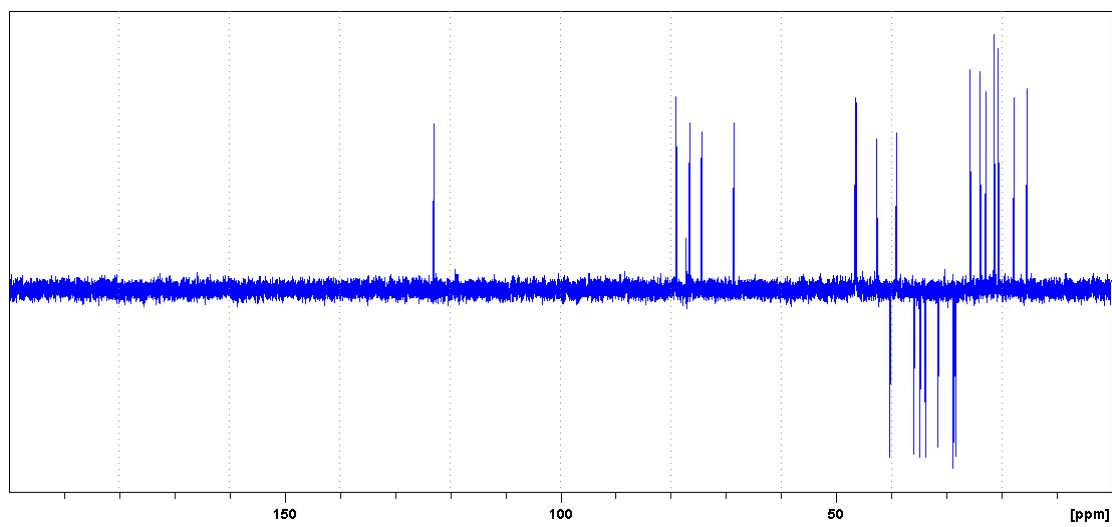

E

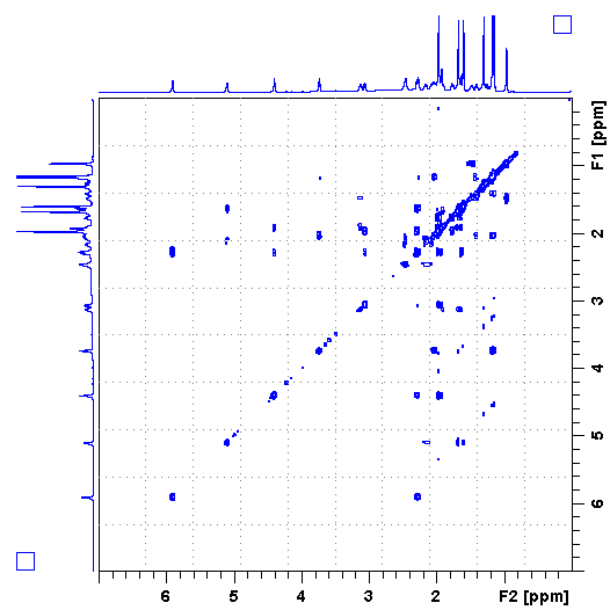

F

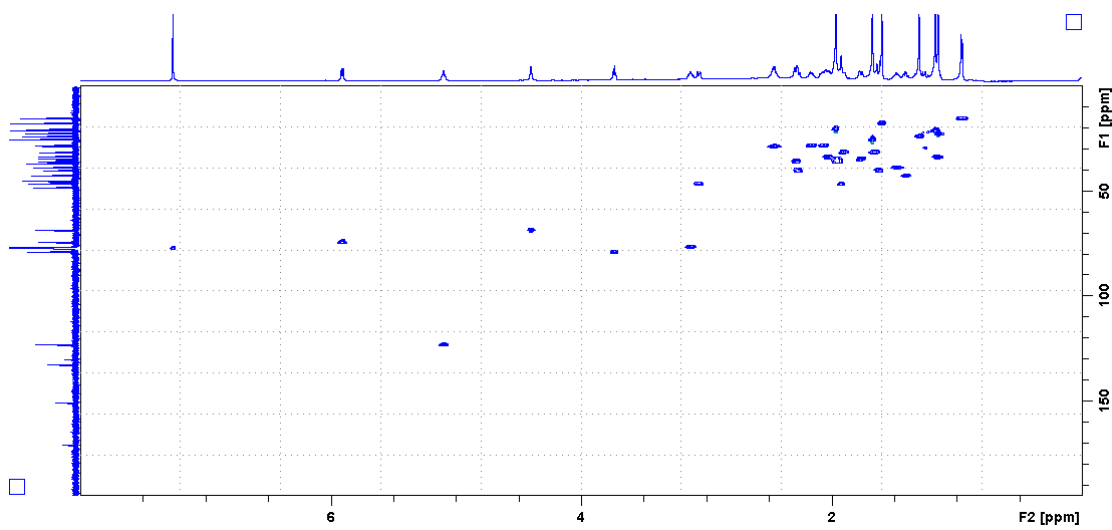

G

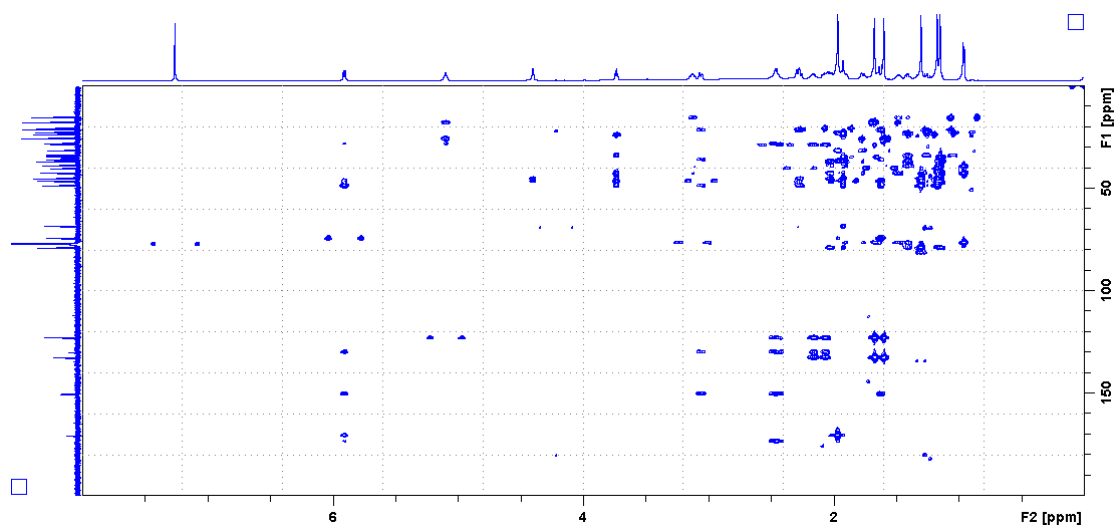

H

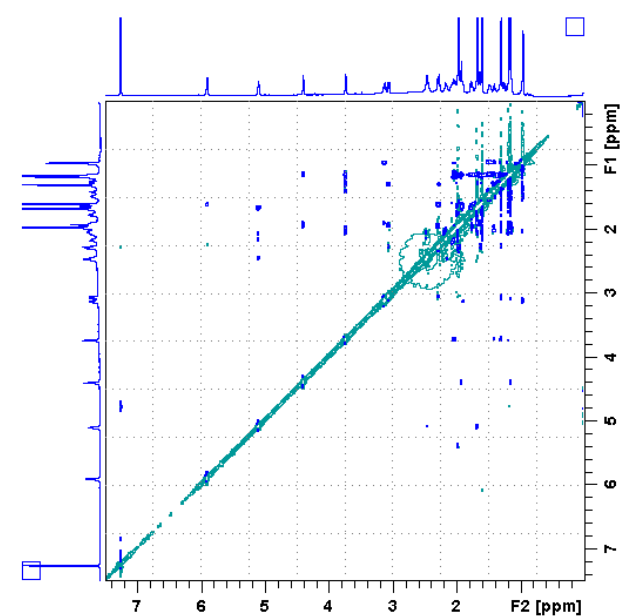

**Figure S9** HRESIMS and NMR spectra of **13**.

(A) HRESIMS spectrum; (B)  $^1\text{H}$  NMR spectrum in  $\text{CDCl}_3$  at 600 MHz; (C)  $^{13}\text{C}$  NMR spectrum in  $\text{CDCl}_3$  at 150 MHz; (D) DEPT 135 spectrum in  $\text{CDCl}_3$  at 150 MHz; (E)  $^1\text{H}$ - $^1\text{H}$  COSY spectrum in  $\text{CDCl}_3$  at 600 MHz; (F) HSQC spectrum in  $\text{CDCl}_3$  at 600 MHz; (G) HMBC spectrum in  $\text{CDCl}_3$  at 600 MHz; (H) NOESY spectrum in  $\text{CDCl}_3$  at 600 MHz.

A

Monoisotopic Mass, Even Electron Ions  
 285 formula(e) evaluated with 1 results within limits (up to 50 closest results for each mass)  
 Elements Used:  
 C: 0-500 H: 0-1000 O: 0-200 Na: 0-1  
 48  
 20190107\_53 188 (1.518)

1: TOF MS ES+  
 7.67e+004

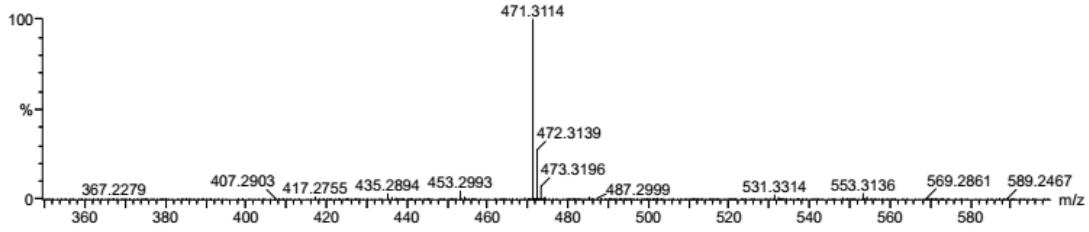

Minimum: -1.5  
 Maximum: 50.0

| Mass     | Calc. Mass | mDa  | PPM  | DBE | i-FIT | Norm | Conf (%) | Formula       |
|----------|------------|------|------|-----|-------|------|----------|---------------|
| 553.3136 | 553.3141   | -0.5 | -0.9 | 8.5 | 57.3  | n/a  | n/a      | C31 H46 O7 Na |

B

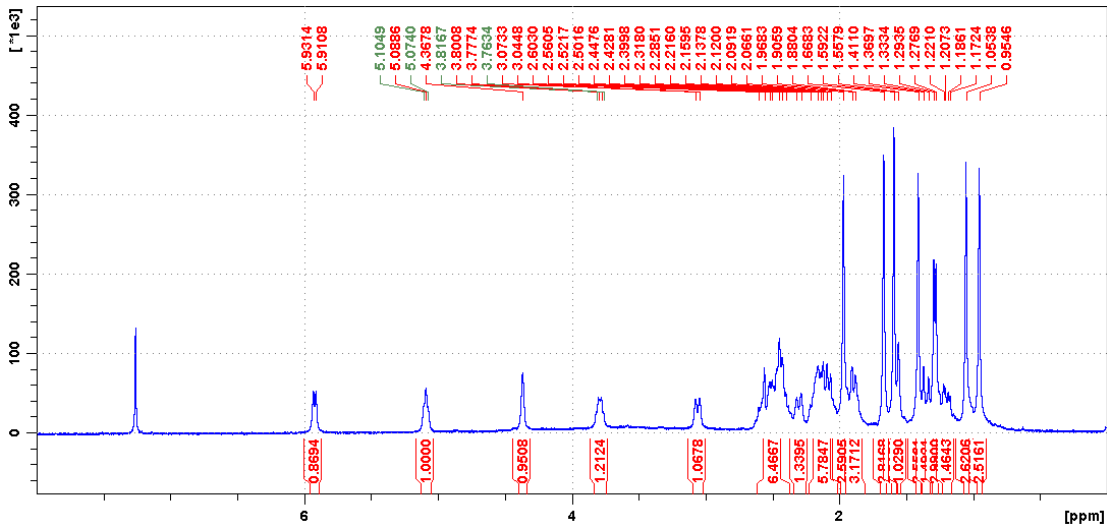

C

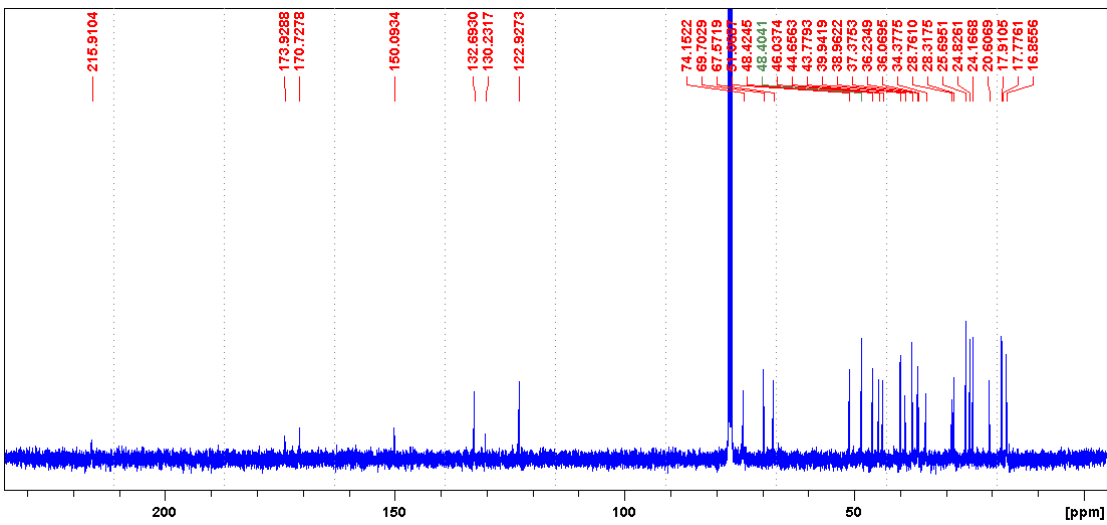

D

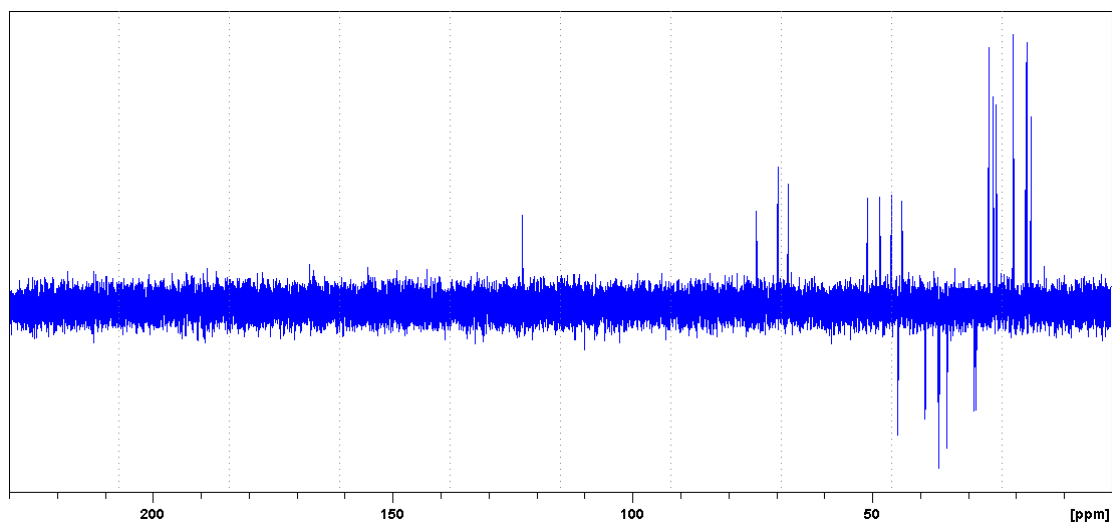

E

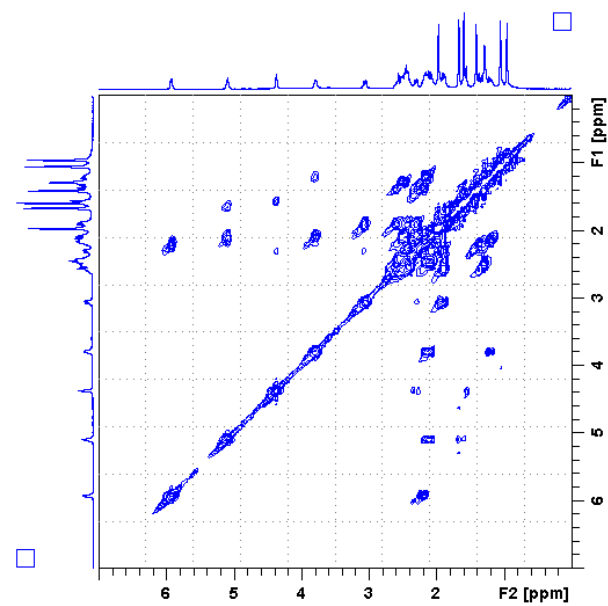

F

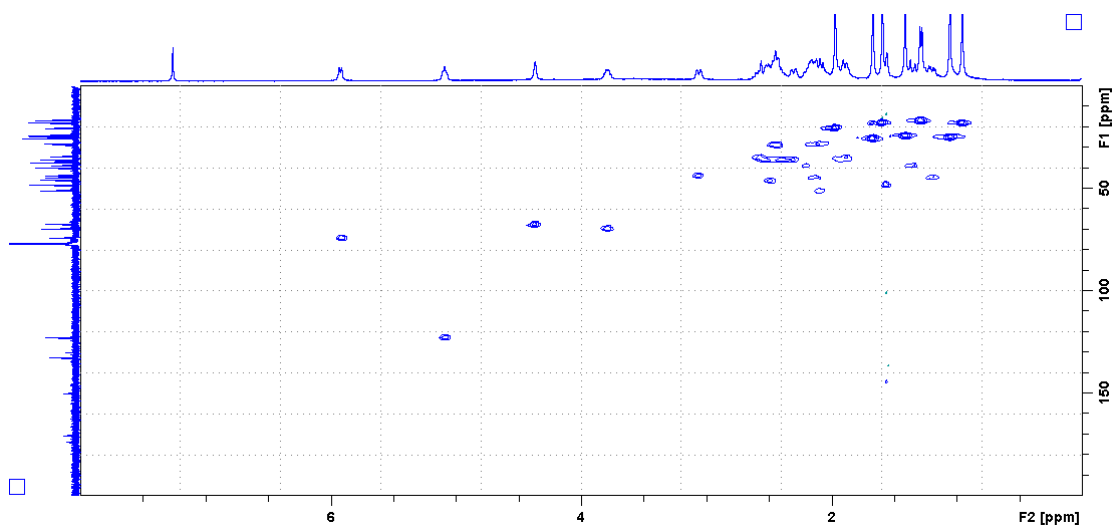



G

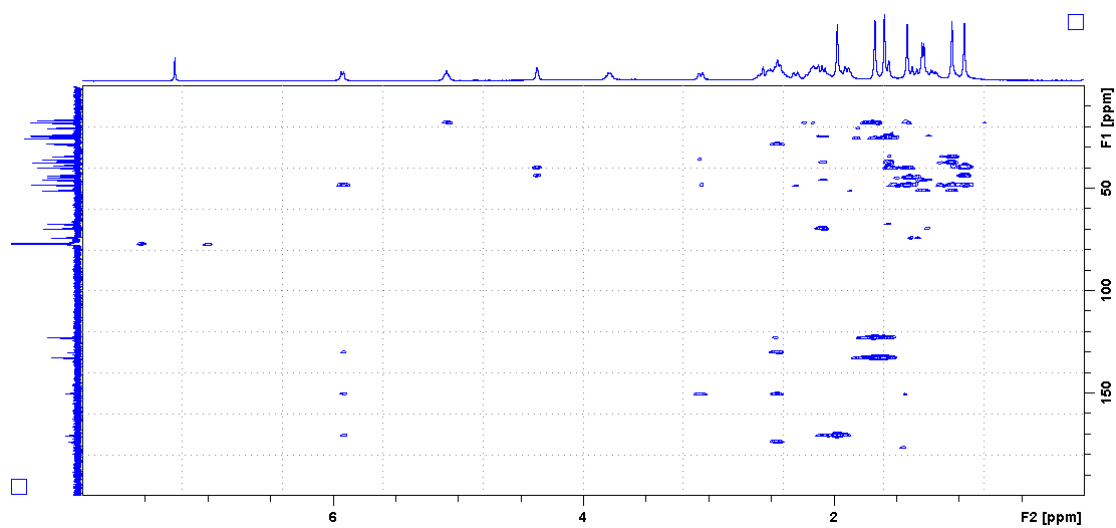

H

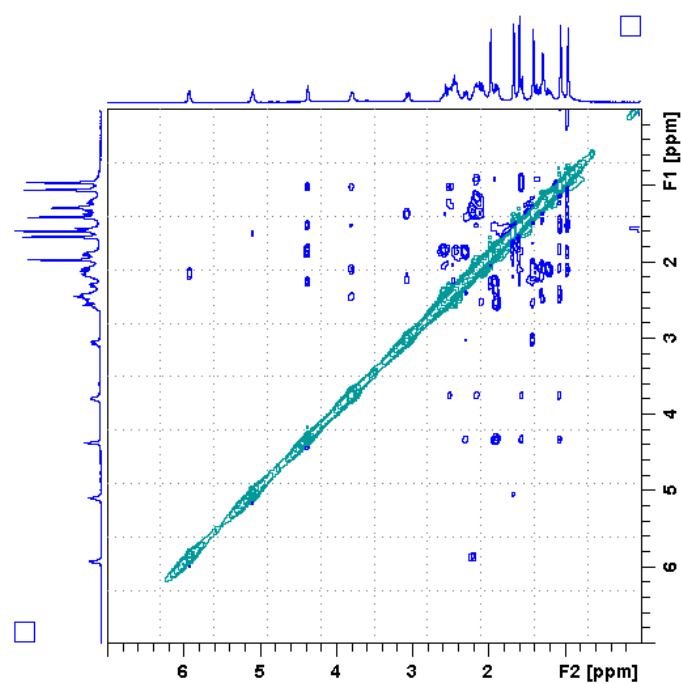

**Figure S10** HRESIMS and NMR spectra of **14**.

(A) HRESIMS spectrum; (B)  $^1\text{H}$  NMR spectrum in  $\text{CDCl}_3$  at 400 MHz; (C)  $^{13}\text{C}$  NMR spectrum in  $\text{CDCl}_3$  at 100 MHz; (D) DEPT 135 spectrum in  $\text{CDCl}_3$  at 100 MHz; (E)  $^1\text{H}$ - $^1\text{H}$  COSY spectrum in  $\text{CDCl}_3$  at 400 MHz; (F) HSQC spectrum in  $\text{CDCl}_3$  at 400 MHz; (G) HMBC spectrum in  $\text{CDCl}_3$  at 400 MHz; (H) ROESY spectrum in  $\text{CDCl}_3$  at 400 MHz.

A

Monoisotopic Mass, Even Electron Ions  
 285 formula(e) evaluated with 2 results within limits (up to 50 closest results for each mass)  
 Elements Used:

C: 0-500 H: 0-1000 O: 0-200 Na: 0-1

49  
 20190107\_54 202 (1.635)

1: TOF MS ES+  
 2.34e+005

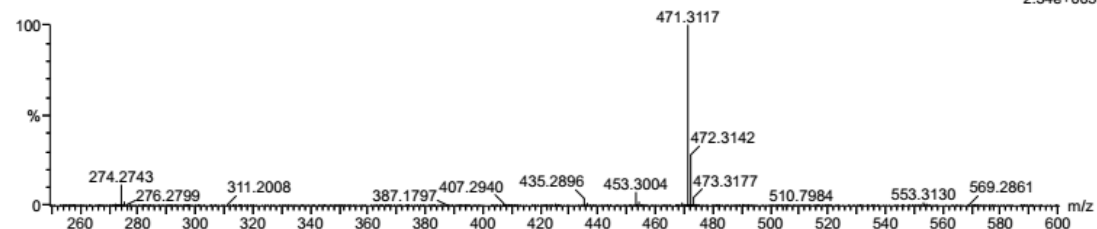

Minimum: -1.5  
 Maximum: 5.0 5.0 50.0

| Mass     | Calc. Mass | mDa  | PPM  | DBE  | i-FIT | Norm  | Conf (%) | Formula       |
|----------|------------|------|------|------|-------|-------|----------|---------------|
| 553.3130 | 553.3141   | -1.1 | -2.0 | 8.5  | 79.8  | 0.135 | 87.41    | C31 H46 O7 Na |
|          | 553.3107   | 2.3  | 4.2  | 20.5 | 81.8  | 2.072 | 12.59    | C40 H41 O2    |

B

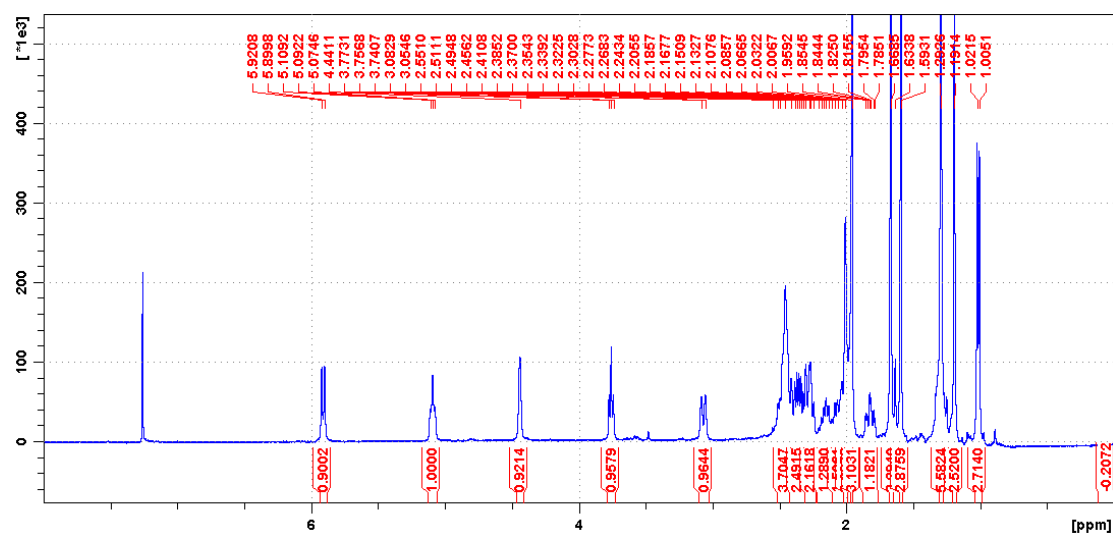

C

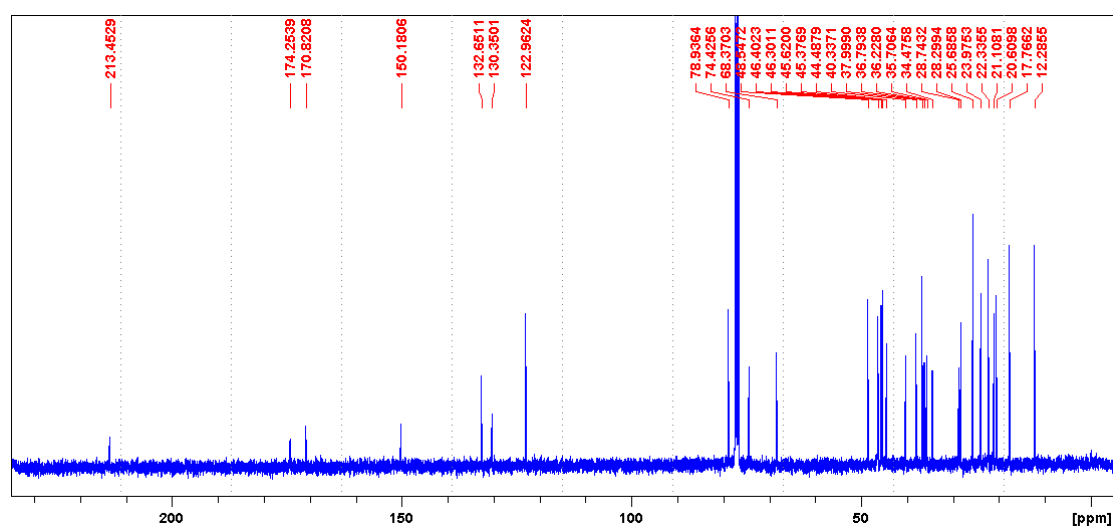

D

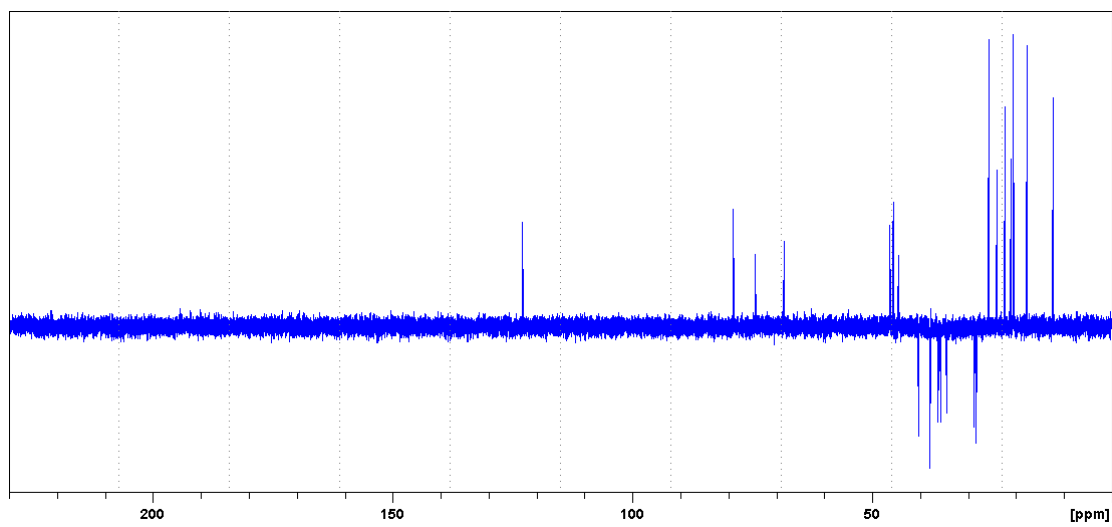

E

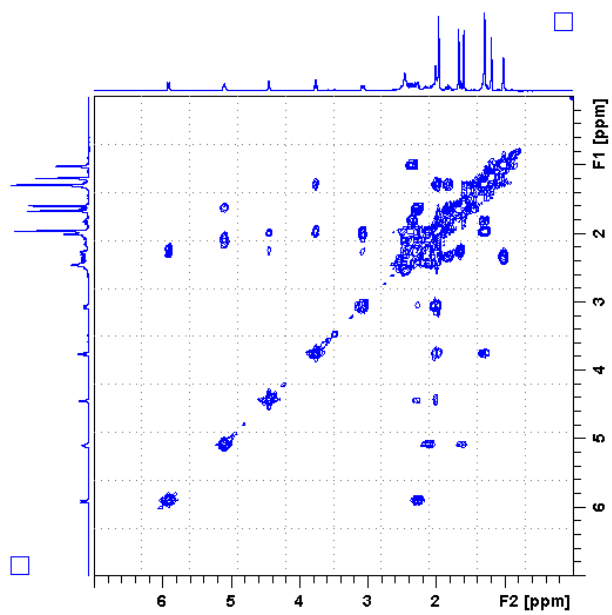

F

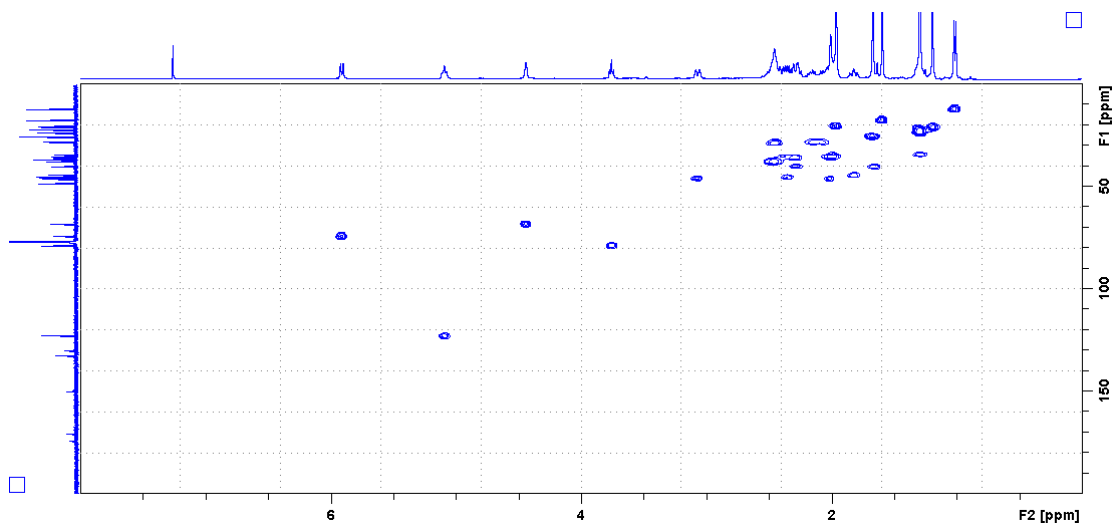

G

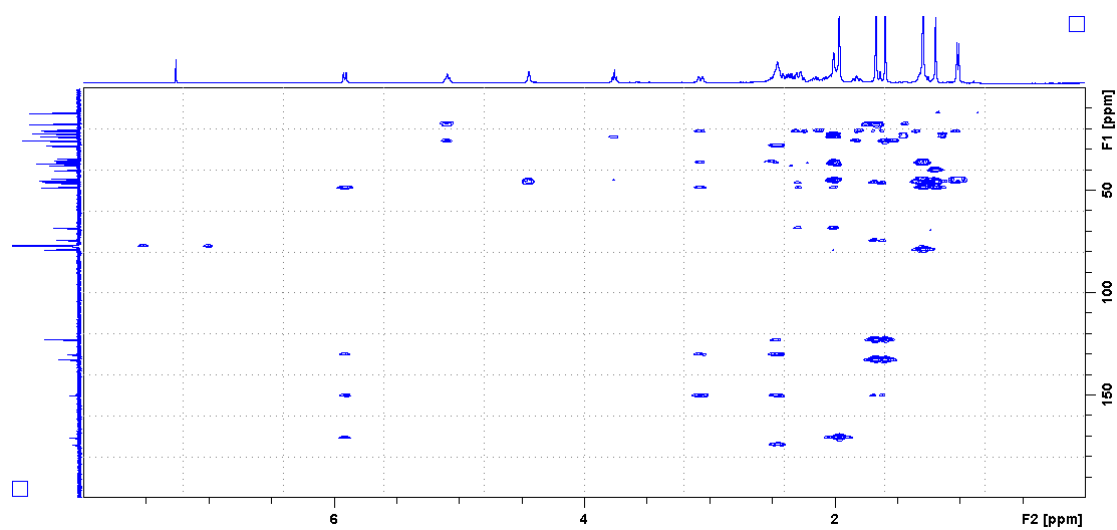

H

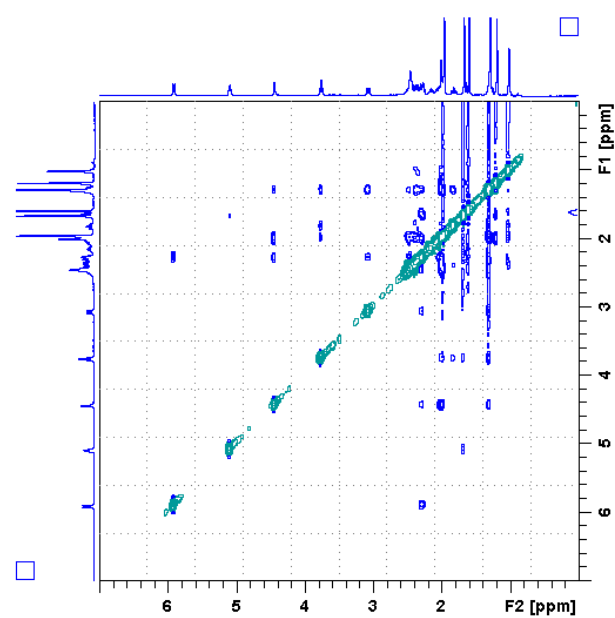

**Figure S11** HRESIMS and NMR spectra of **15**.

(A) HRESIMS spectrum; (B)  $^1\text{H}$  NMR spectrum in  $\text{CDCl}_3$  at 400 MHz; (C)  $^{13}\text{C}$  NMR spectrum in  $\text{CDCl}_3$  at 100 MHz; (D) DEPT 135 spectrum in  $\text{CDCl}_3$  at 100 MHz; (E)  $^1\text{H}$ - $^1\text{H}$  COSY spectrum in  $\text{CDCl}_3$  at 400 MHz; (F) HSQC spectrum in  $\text{CDCl}_3$  at 400 MHz; (G) HMBC spectrum in  $\text{CDCl}_3$  at 400 MHz; (H) ROESY spectrum in  $\text{CDCl}_3$  at 400 MHz.

A

Monoisotopic Mass, Even Electron Ions  
 300 formula(e) evaluated with 1 results within limits (up to 50 closest results for each mass)  
 Elements Used:  
 C: 0-500 H: 0-1000 O: 0-200 Na: 0-1  
 50  
 20190107\_55 173 (1.406)

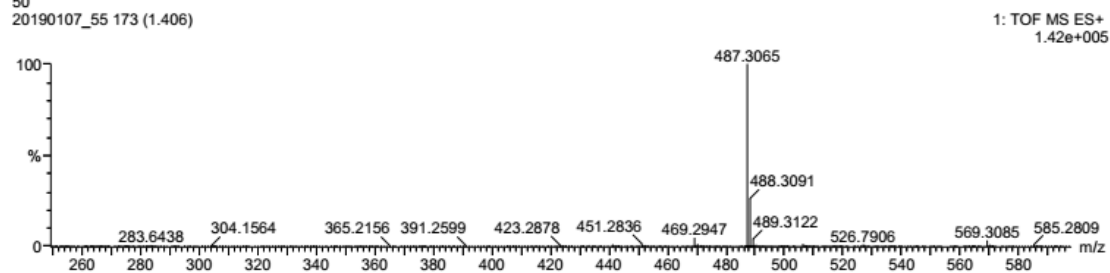

1: TOF MS ES+  
1.42e+005

Minimum: -1.5  
 Maximum: 5.0 5.0 50.0

| Mass     | Calc. Mass | mDa  | PPM  | DBE | i-FIT | Norm | Conf (%) | Formula       |
|----------|------------|------|------|-----|-------|------|----------|---------------|
| 569.3085 | 569.3090   | -0.5 | -0.9 | 8.5 | 75.6  | n/a  | n/a      | C31 H46 O8 Na |

B

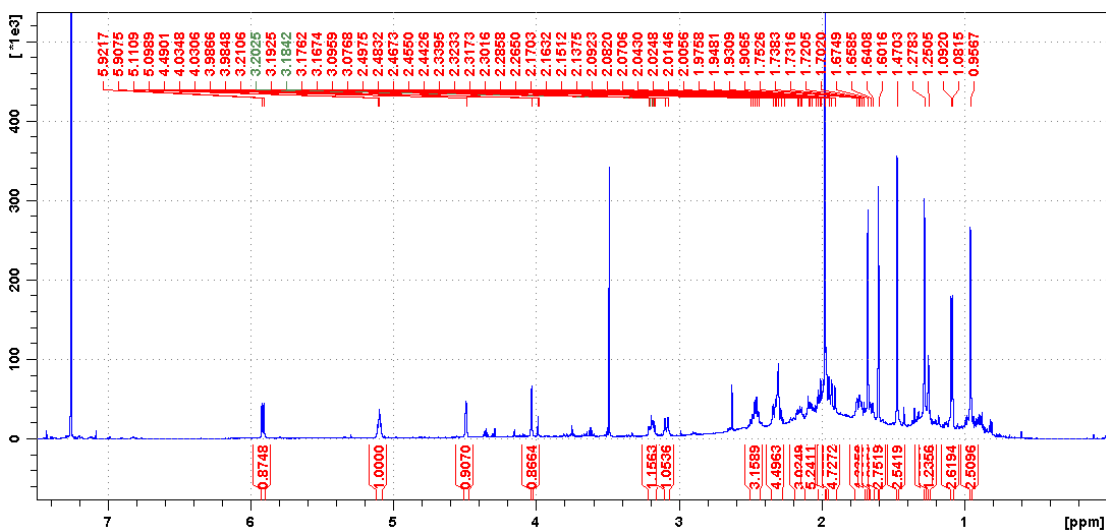

C

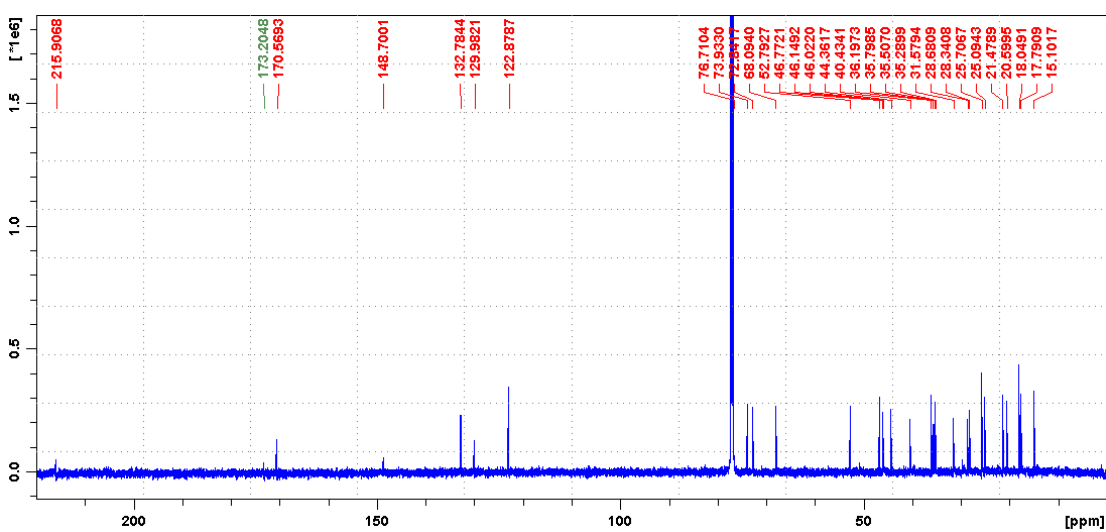

D

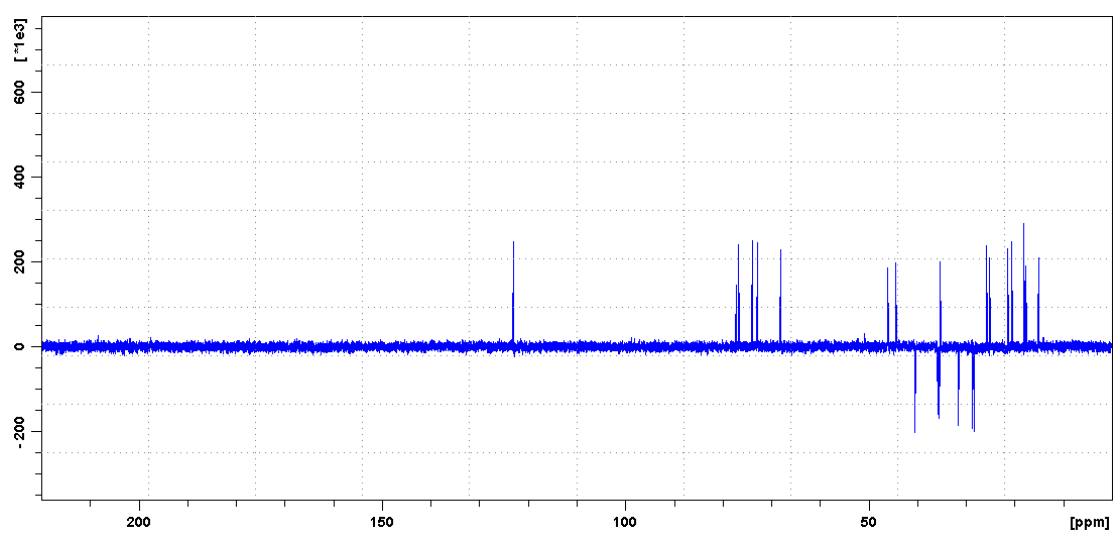

E

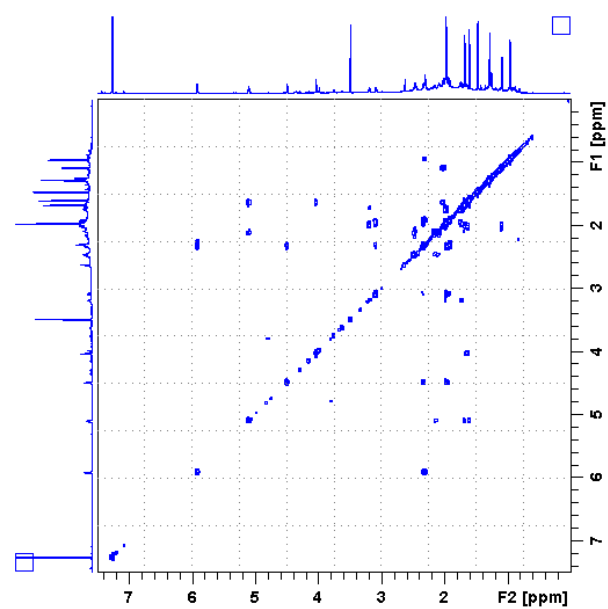

F

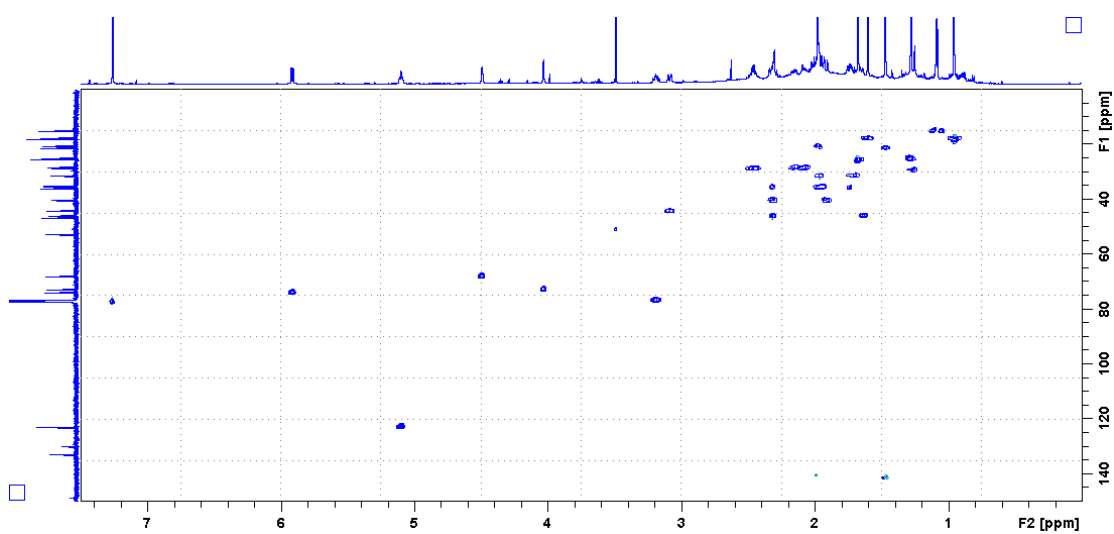

G

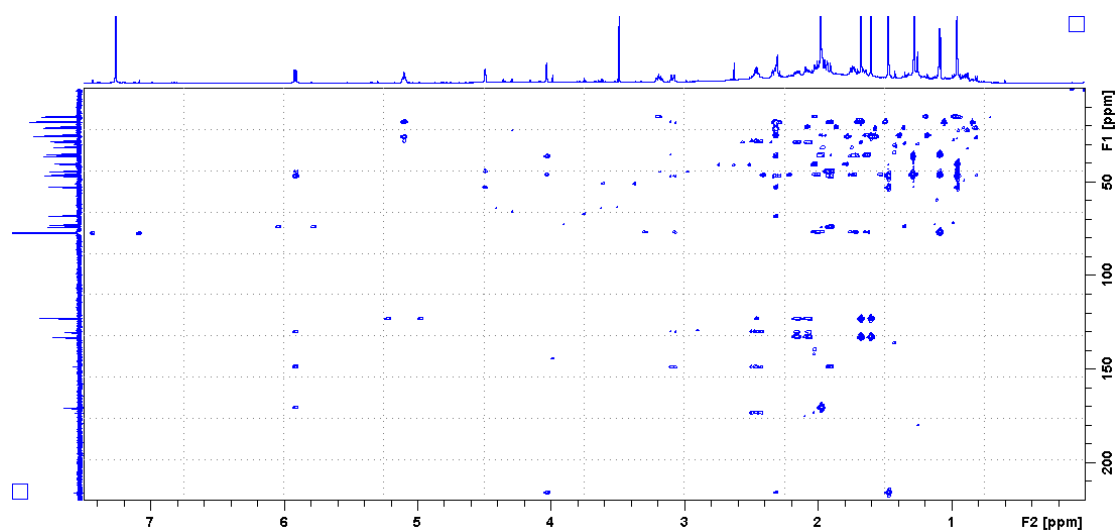

H

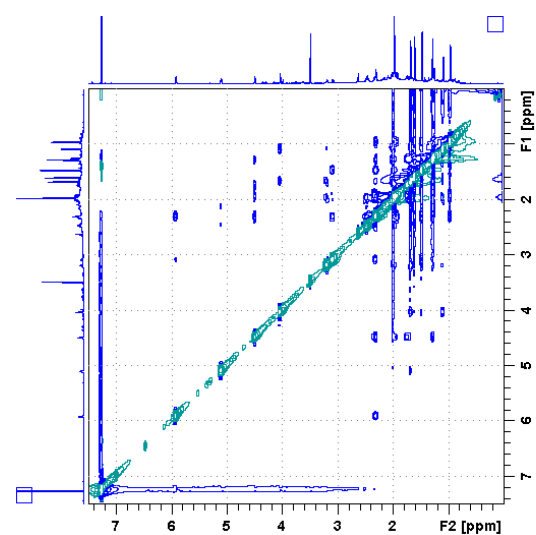

**Figure S12** HRESIMS and NMR spectra of **17**.

(A) HRESIMS spectrum; (B)  $^1\text{H}$  NMR spectrum in  $\text{CDCl}_3$  at 600 MHz; (C)  $^{13}\text{C}$  NMR spectrum in  $\text{CDCl}_3$  at 150 MHz; (D) DEPT 135 spectrum in  $\text{CDCl}_3$  at 150 MHz; (E)  $^1\text{H}$ - $^1\text{H}$  COSY spectrum in  $\text{CDCl}_3$  at 600 MHz; (F) HSQC spectrum in  $\text{CDCl}_3$  at 600 MHz; (G) HMBC spectrum in  $\text{CDCl}_3$  at 600 MHz; (H) ROESY spectrum in  $\text{CDCl}_3$  at 400 MHz.

A

Monoisotopic Mass, Even Electron Ions  
 298 formula(e) evaluated with 2 results within limits (up to 50 closest results for each mass)  
 Elements Used:  
 C: 0-500 H: 0-1000 O: 0-200 Na: 0-1  
 51  
 20190107\_56 178 (1.444)

1: TOF MS ES+  
 2.14e+005

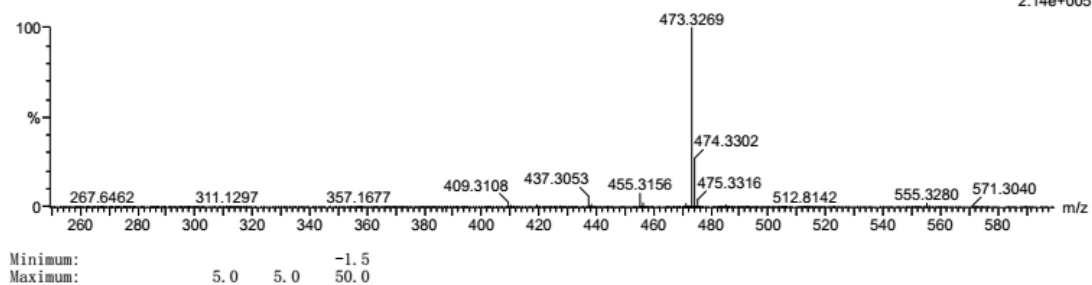

| Mass     | Calc. Mass | mDa  | PPM  | DBE  | i-FIT | Norm  | Conf (%) | Formula       |
|----------|------------|------|------|------|-------|-------|----------|---------------|
| 555.3280 | 555.3298   | -1.8 | -3.2 | 7.5  | 59.8  | 0.006 | 99.36    | C31 H48 O7 Na |
|          | 555.3263   | 1.7  | 3.1  | 19.5 | 64.9  | 5.049 | 0.64     | C40 H43 O2    |

B

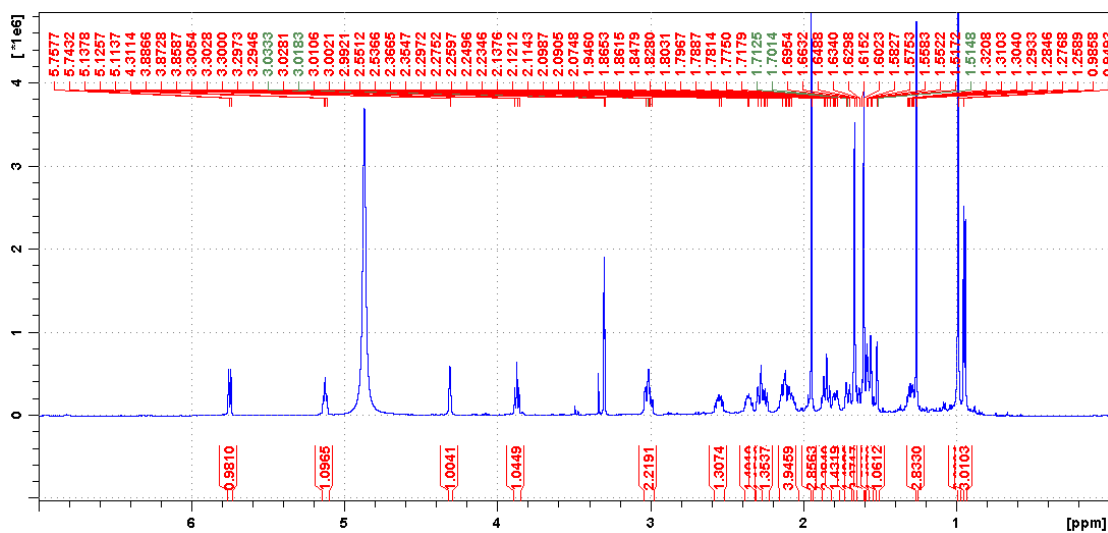

C

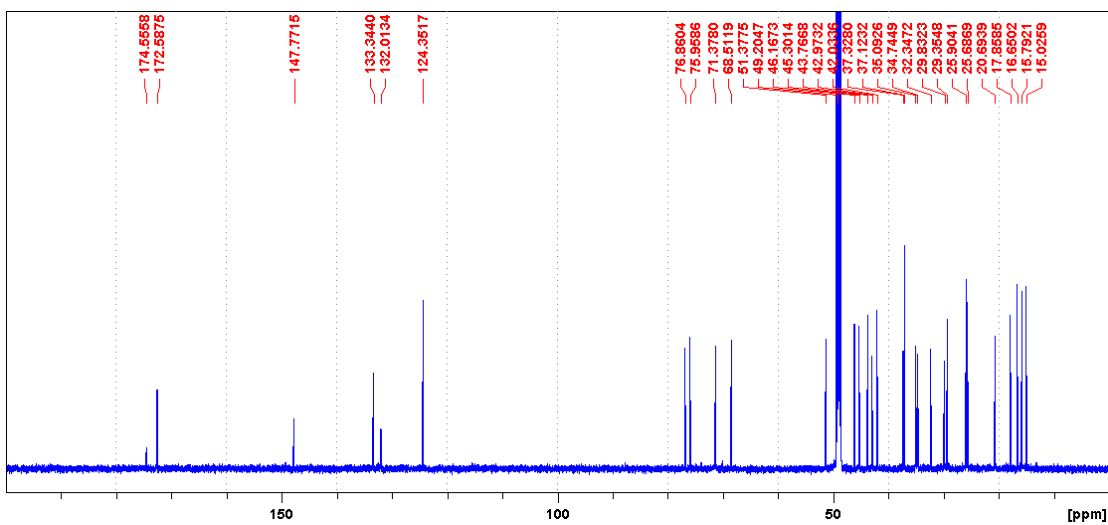



D

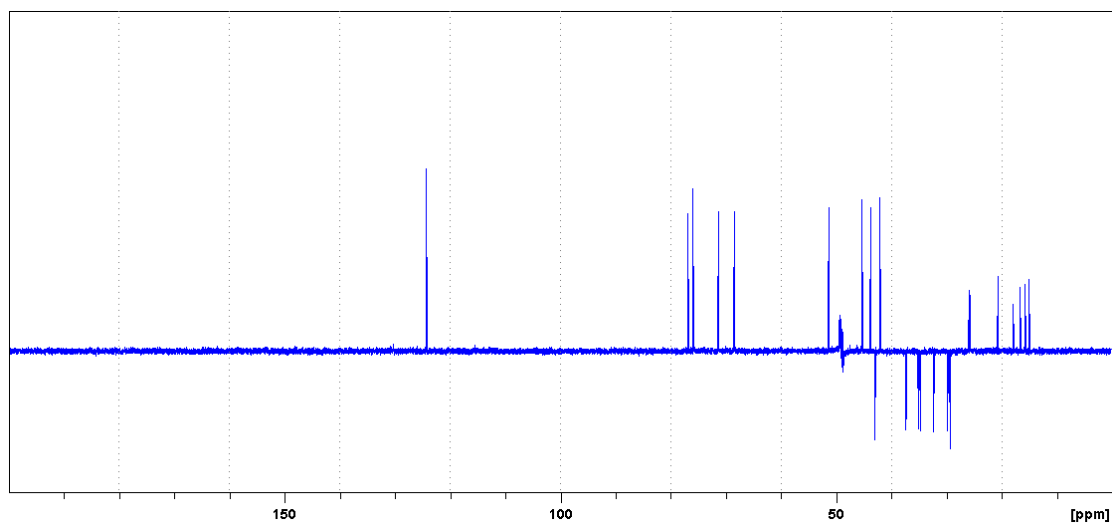

E

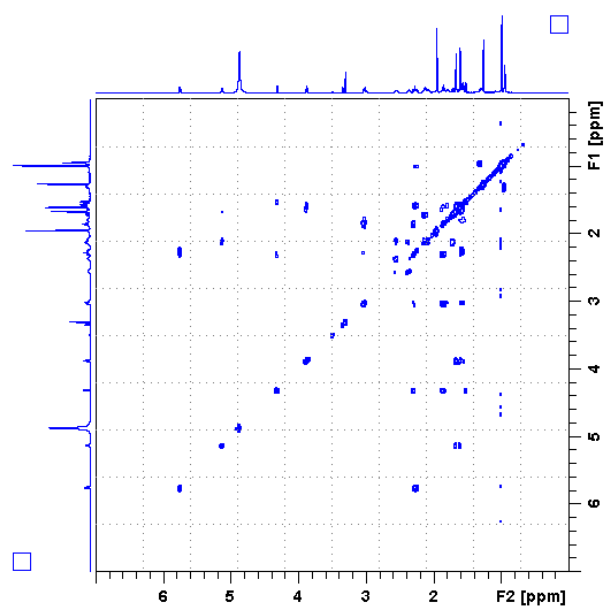

F

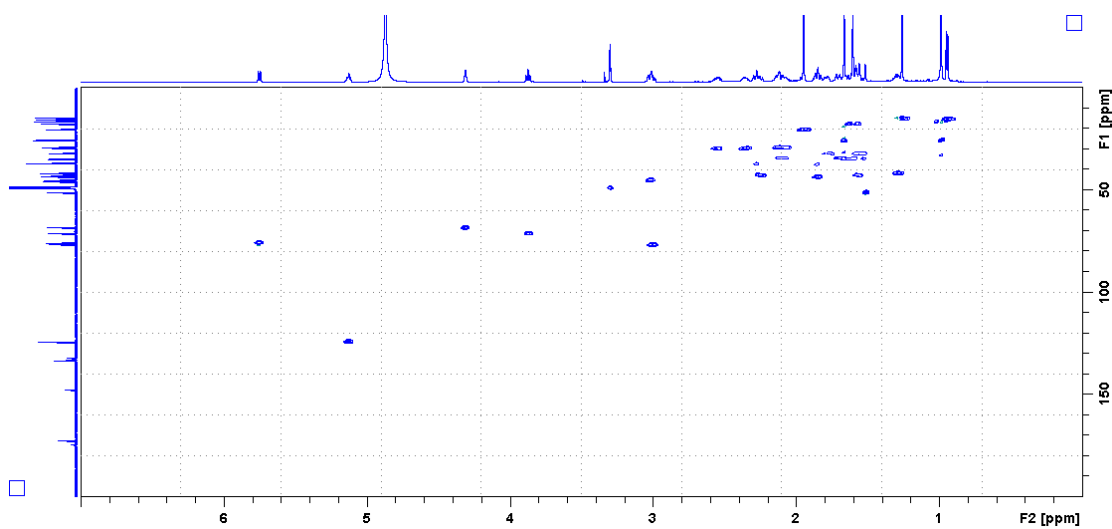

G

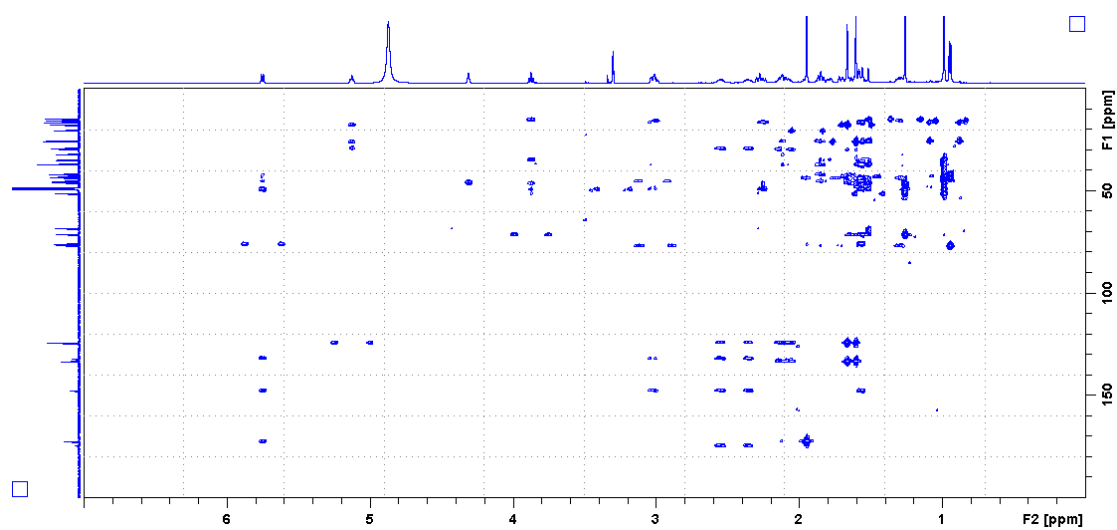

H

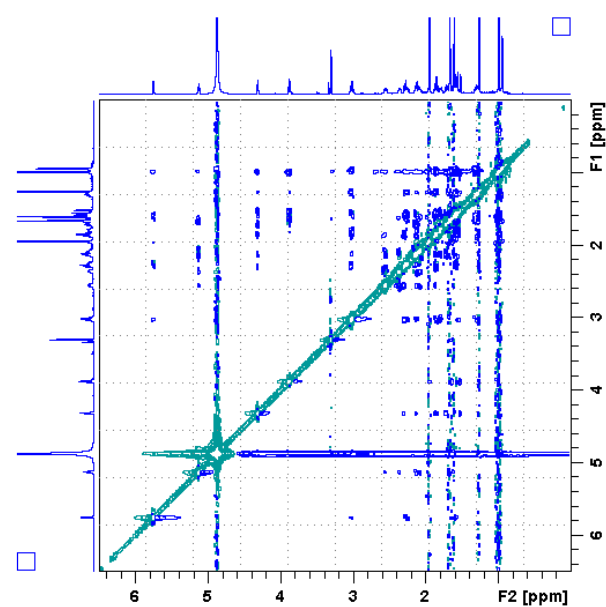

**Figure S13** HRESIMS and NMR spectra of **18**.

(A) HRESIMS spectrum; (B)  $^1\text{H}$  NMR spectrum in  $\text{CD}_3\text{OD}$  at 600 MHz; (C)  $^{13}\text{C}$  NMR spectrum in  $\text{CD}_3\text{OD}$  at 150 MHz; (D) DEPT 135 spectrum in  $\text{CD}_3\text{OD}$  at 150 MHz; (E)  $^1\text{H}$ - $^1\text{H}$  COSY spectrum in  $\text{CD}_3\text{OD}$  at 600 MHz; (F) HSQC spectrum in  $\text{CD}_3\text{OD}$  at 600 MHz; (G) HMBC spectrum in  $\text{CD}_3\text{OD}$  at 600 MHz; (H) NOESY spectrum in  $\text{CD}_3\text{OD}$  at 600 MHz.

A

Monoisotopic Mass, Even Electron Ions  
 285 formula(e) evaluated with 2 results within limits (up to 50 closest results for each mass)  
 Elements Used:  
 C: 0-500 H: 0-1000 O: 0-200 Na: 0-1  
 44  
 20190107\_49 191 (1.541)

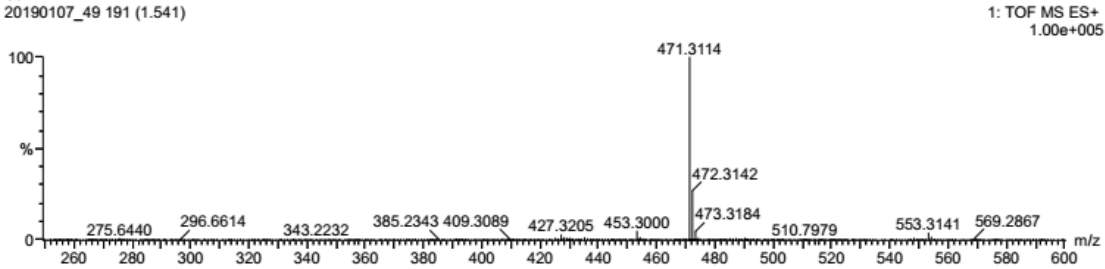

Minimum: -1.5  
 Maximum: 5.0 5.0 50.0

| Mass     | Calc. Mass | mDa  | PPM  | DBE  | i-FIT | Norm  | Conf (%) | Formula       |
|----------|------------|------|------|------|-------|-------|----------|---------------|
| 553.3141 | 553.3141   | 0.0  | 0.0  | 8.5  | 36.3  | 1.883 | 15.21    | C31 H46 O7 Na |
|          | 553.3165   | -2.4 | -4.3 | 11.5 | 34.6  | 0.165 | 84.79    | C33 H45 O7    |

B

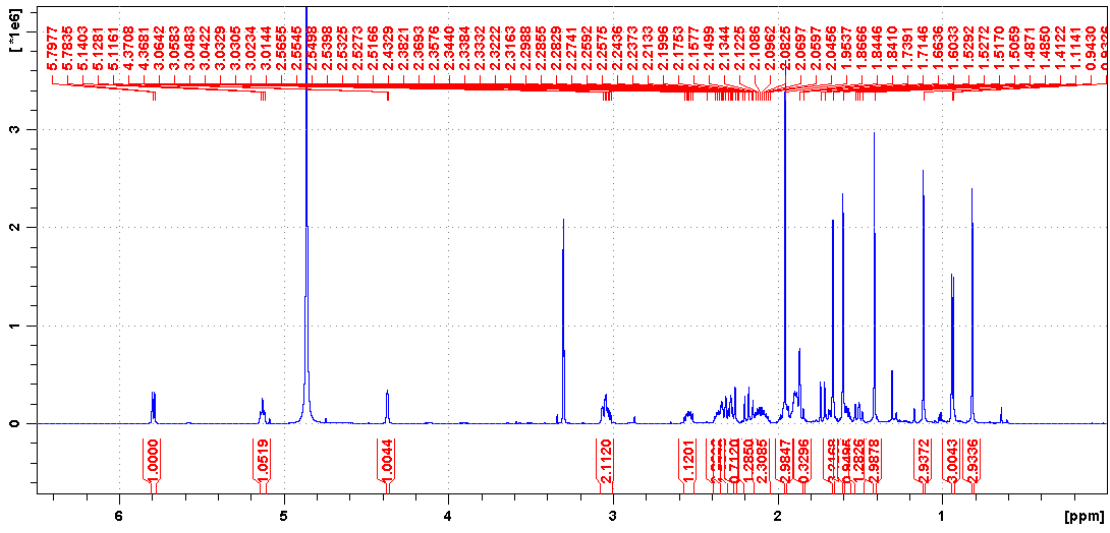

C

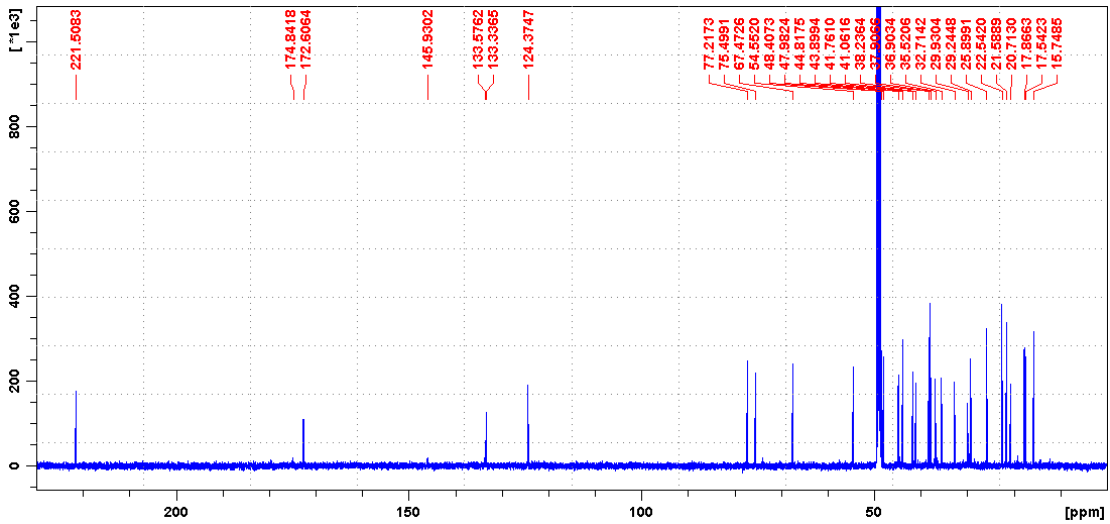

D

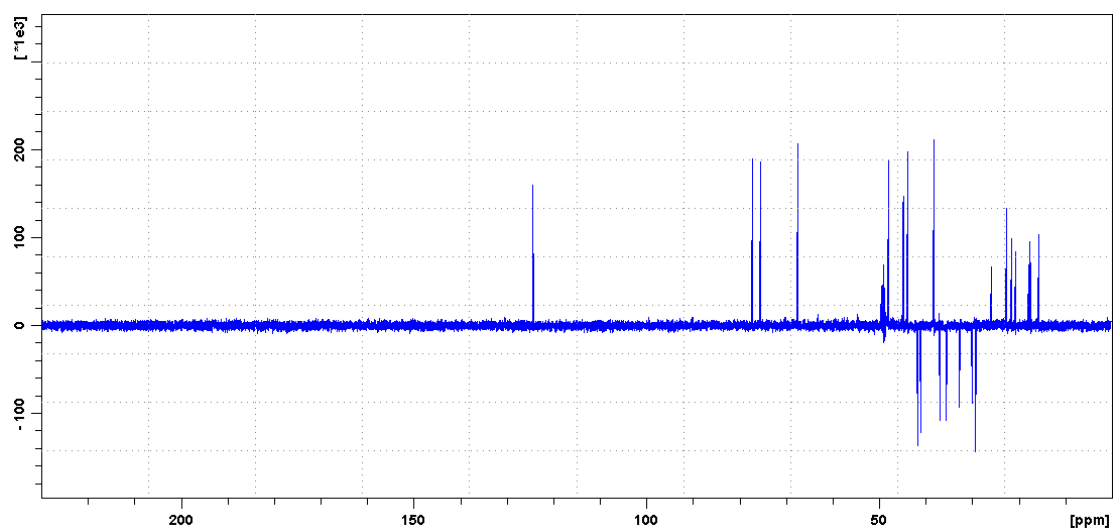

E

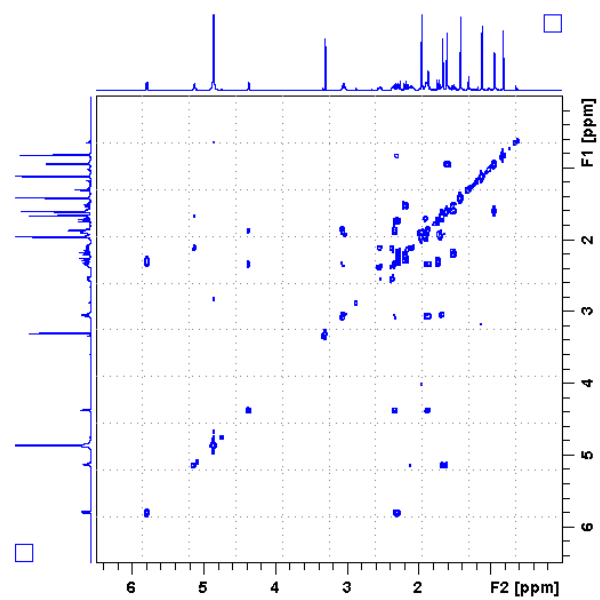

F

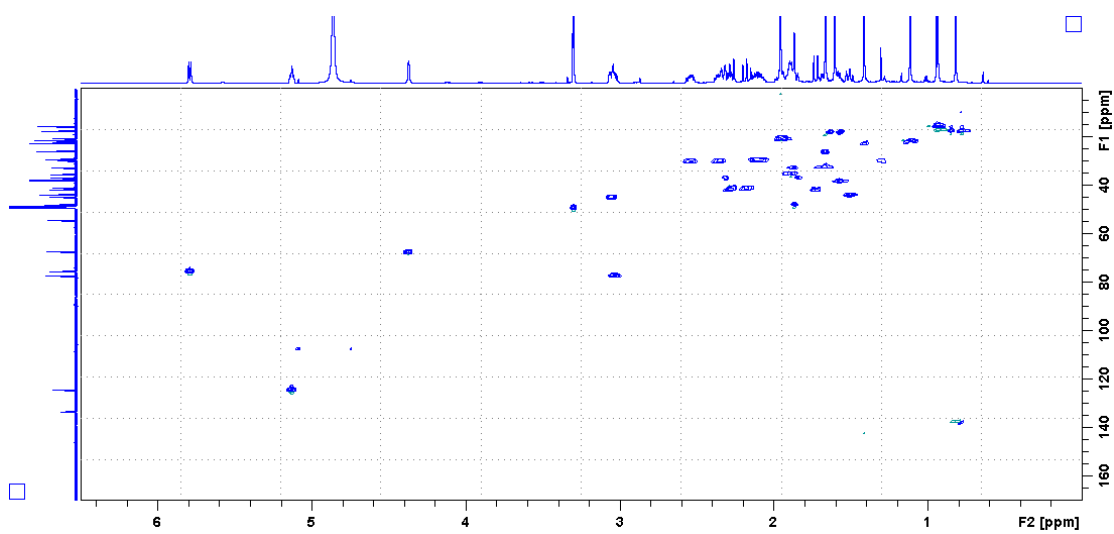

G

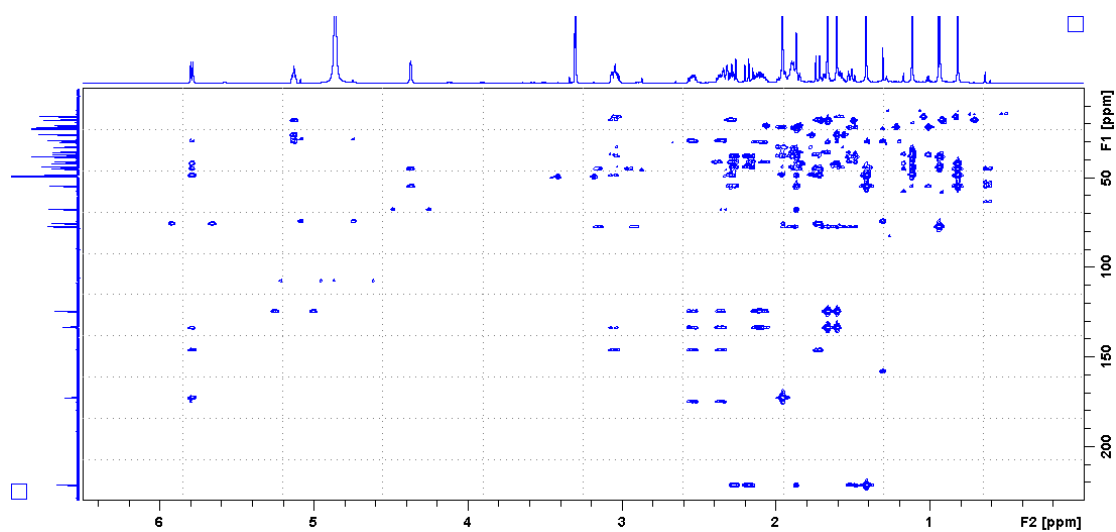

H

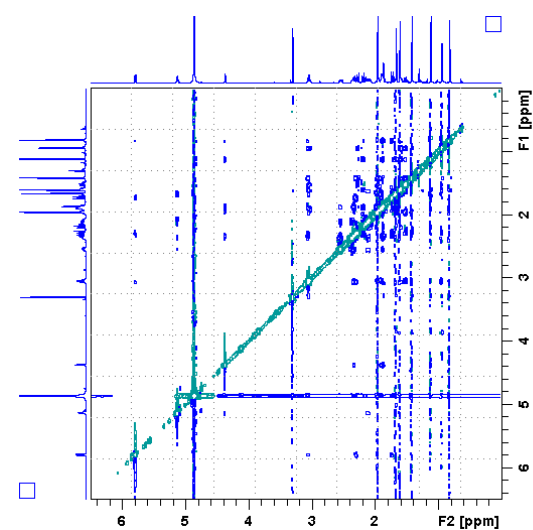

**Figure S14** HRESIMS and NMR spectra of **19**.

(A) HRESIMS spectrum; (B)  $^1\text{H}$  NMR spectrum in  $\text{CD}_3\text{OD}$  at 600 MHz; (C)  $^{13}\text{C}$  NMR spectrum in  $\text{CD}_3\text{OD}$  at 150 MHz; (D) DEPT 135 spectrum in  $\text{CD}_3\text{OD}$  at 150 MHz; (E)  $^1\text{H}$ - $^1\text{H}$  COSY spectrum in  $\text{CD}_3\text{OD}$  at 600 MHz; (F) HSQC spectrum in  $\text{CD}_3\text{OD}$  at 600 MHz; (G) HMBC spectrum in  $\text{CD}_3\text{OD}$  at 600 MHz; (H) NOESY spectrum in  $\text{CD}_3\text{OD}$  at 600 MHz.

A

Monoisotopic Mass, Even Electron Ions  
 310 formula(e) evaluated with 2 results within limits (up to 50 closest results for each mass)

Elements Used:  
 C: 0-500 H: 0-1000 O: 0-200 Na: 0-1

45  
 20190107\_50\_206 (1.664)

1: TOF MS ES+  
 6.99e+04

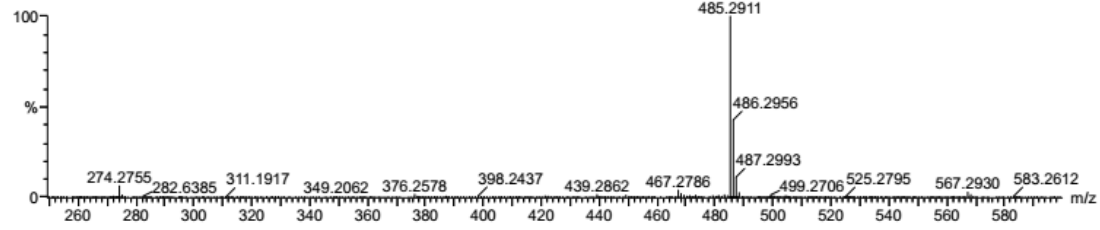

| Mass     | Calc. Mass | mDa  | PPM  | DBE  | i-FIT | Norm  | Conf (%) | Formula       |
|----------|------------|------|------|------|-------|-------|----------|---------------|
| 567.2930 | 567.2934   | -0.4 | -0.7 | 9.5  | 34.3  | 0.833 | 43.47    | C31 H44 O8 Na |
|          | 567.2958   | -2.8 | -4.9 | 12.5 | 34.0  | 0.570 | 56.53    | C33 H43 O8    |

B

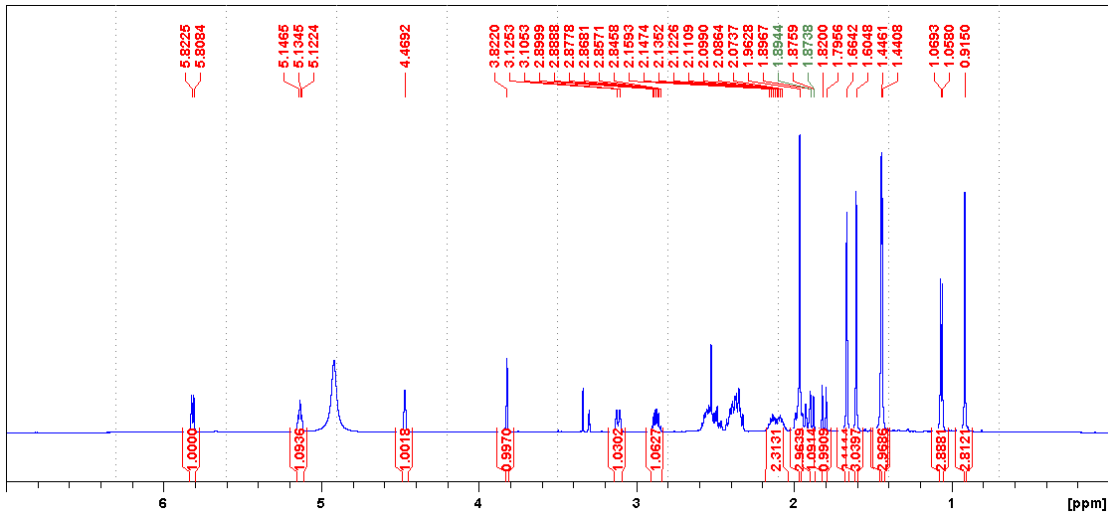

C

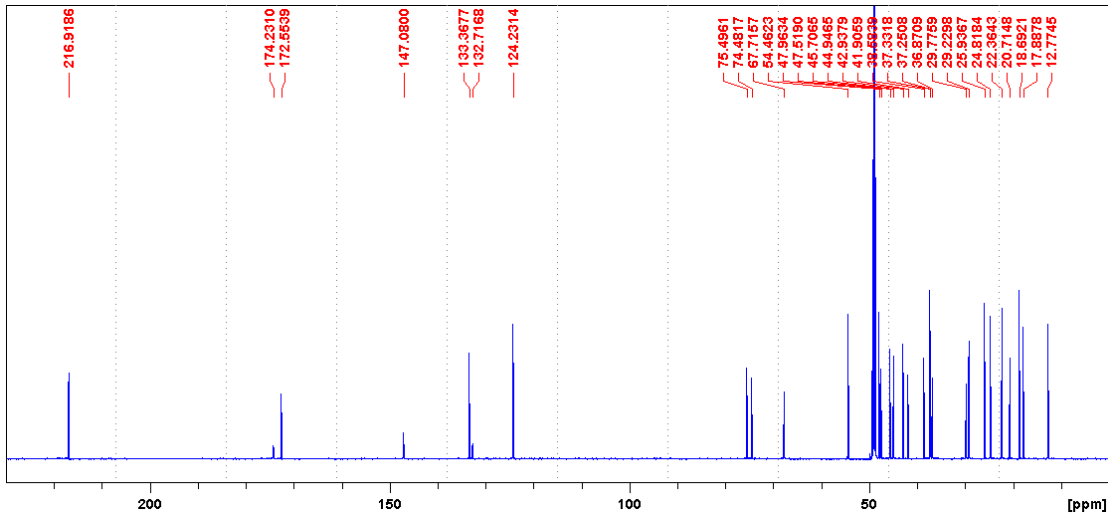

D

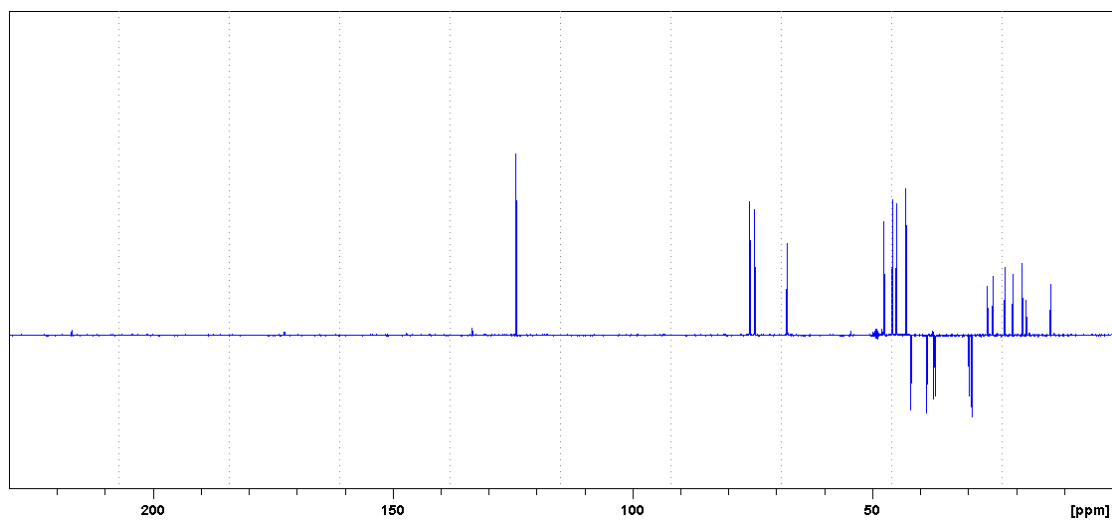

E

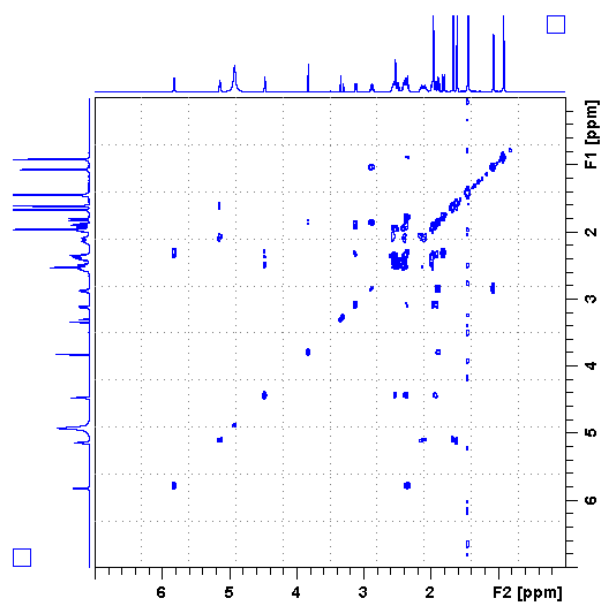

F

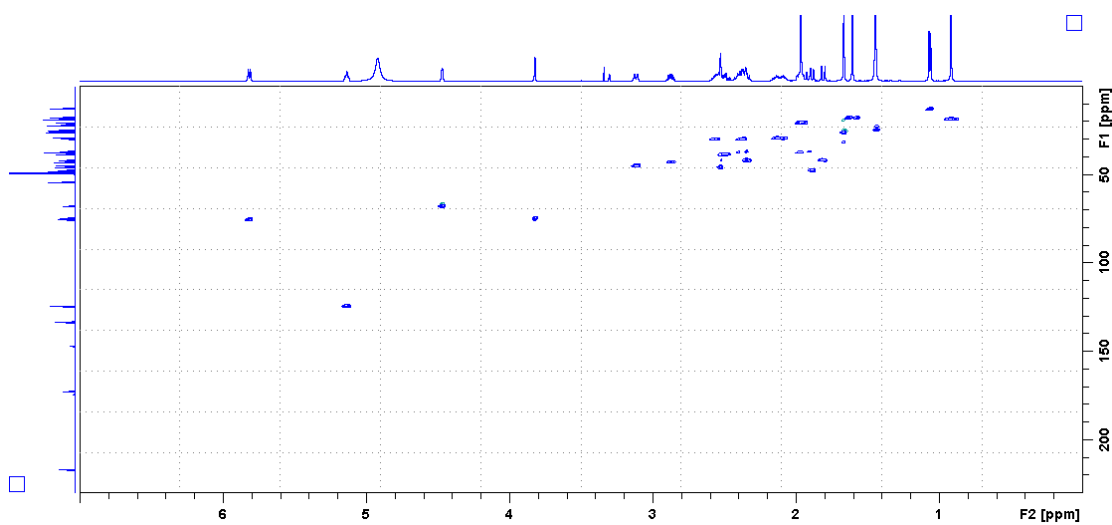

G

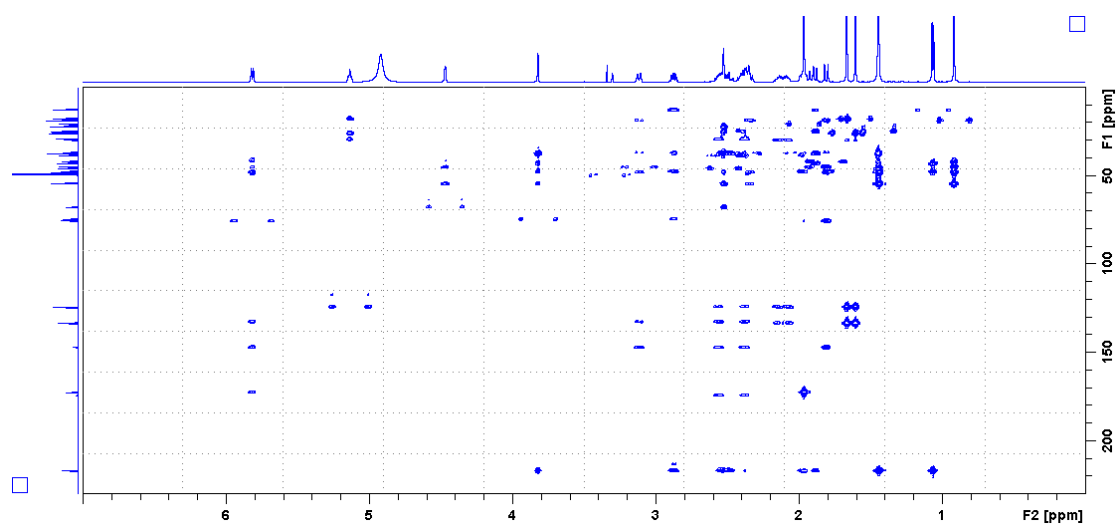

H

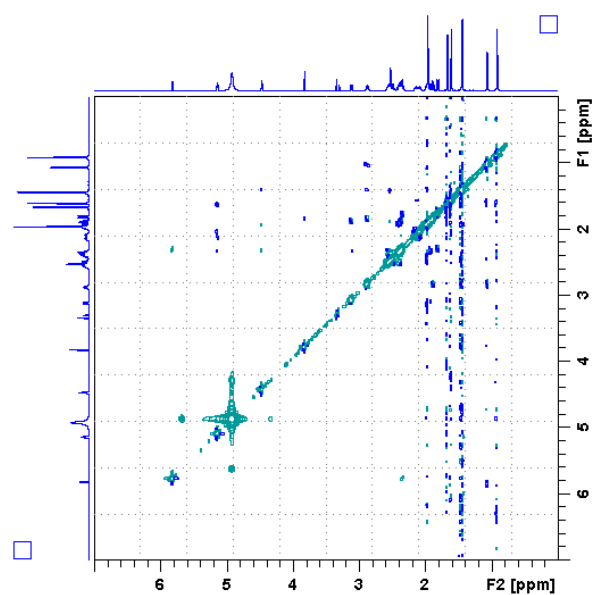

**Figure S15** HRESIMS and NMR spectra of **20**.

(A) HRESIMS spectrum; (B)  $^1\text{H}$  NMR spectrum in  $\text{CD}_3\text{OD}$  at 600 MHz; (C)  $^{13}\text{C}$  NMR spectrum in  $\text{CD}_3\text{OD}$  at 150 MHz; (D) DEPT 135 spectrum in  $\text{CD}_3\text{OD}$  at 150 MHz; (E)  $^1\text{H}$ - $^1\text{H}$  COSY spectrum in  $\text{CD}_3\text{OD}$  at 600 MHz; (F) HSQC spectrum in  $\text{CD}_3\text{OD}$  at 600 MHz; (G) HMBC spectrum in  $\text{CD}_3\text{OD}$  at 600 MHz; (H) NOESY spectrum in  $\text{CD}_3\text{OD}$  at 600 MHz.



A

Monoisotopic Mass, Even Electron Ions  
 285 formula(e) evaluated with 2 results within limits (up to 50 closest results for each mass)  
 Elements Used:  
 C: 0-500 H: 0-1000 O: 0-200 Na: 0-1  
 46  
 20190107\_51 208 (1.679)

1: TOF MS ES+  
 9.05e+04

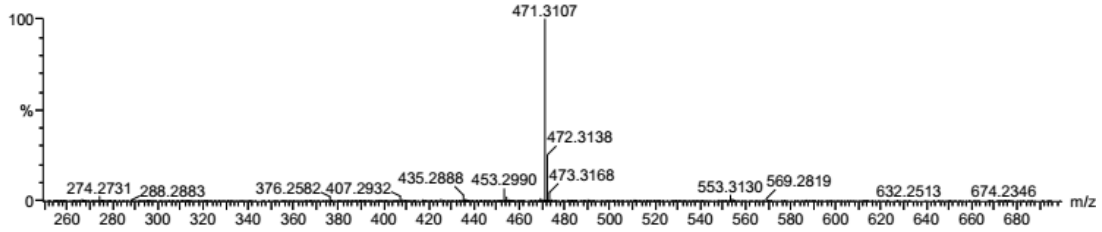

Minimum: -1.5  
 Maximum: 5.0 5.0 50.0

| Mass     | Calc. Mass | mDa  | PPM  | DBE  | i-FIT | Norm  | Conf (%) | Formula       |
|----------|------------|------|------|------|-------|-------|----------|---------------|
| 553.3130 | 553.3141   | -1.1 | -2.0 | 8.5  | 67.8  | 0.048 | 95.34    | C31 H46 O7 Na |
|          | 553.3107   | 2.3  | 4.2  | 20.5 | 70.8  | 3.066 | 4.66     | C40 H41 O2    |

B

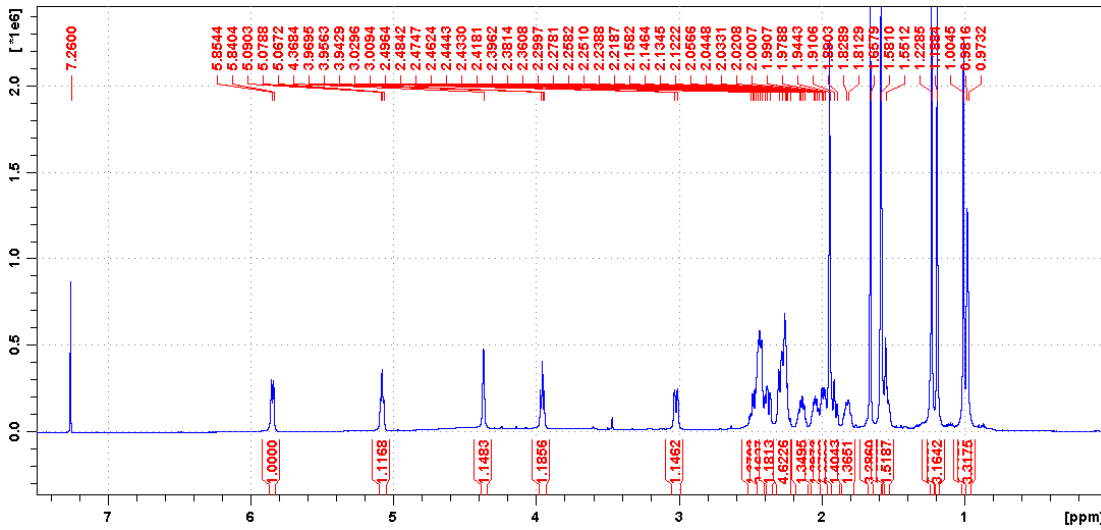

C

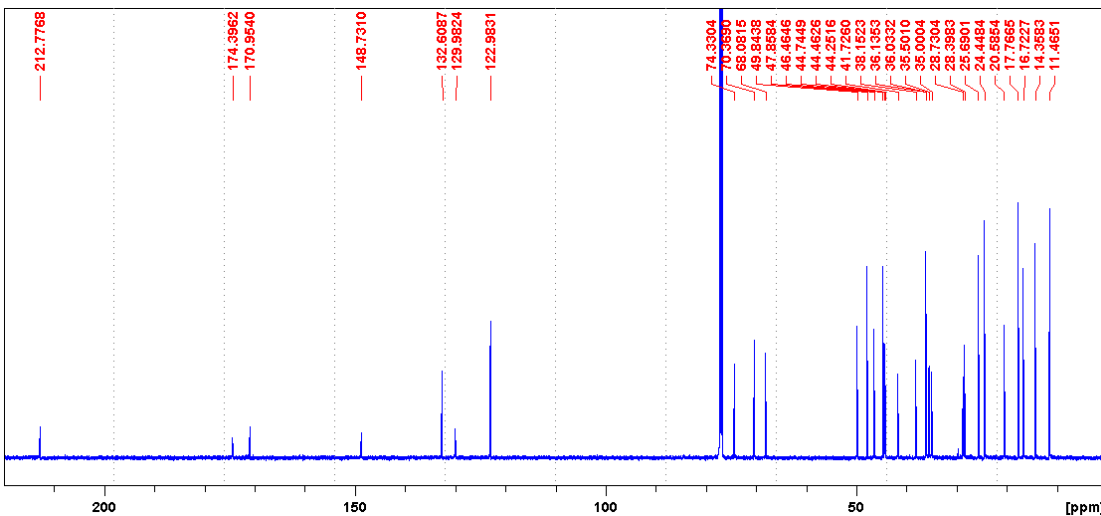

D

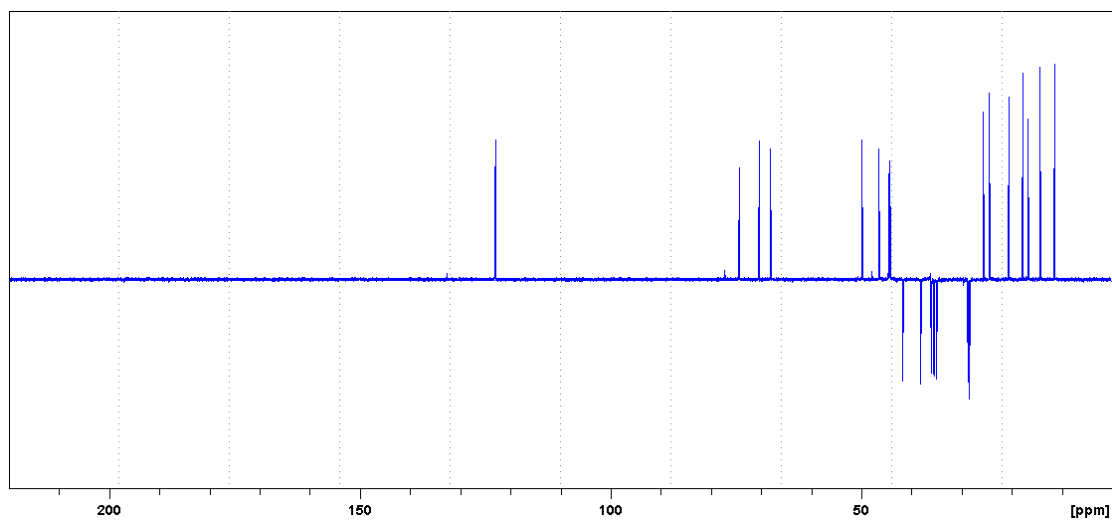

E

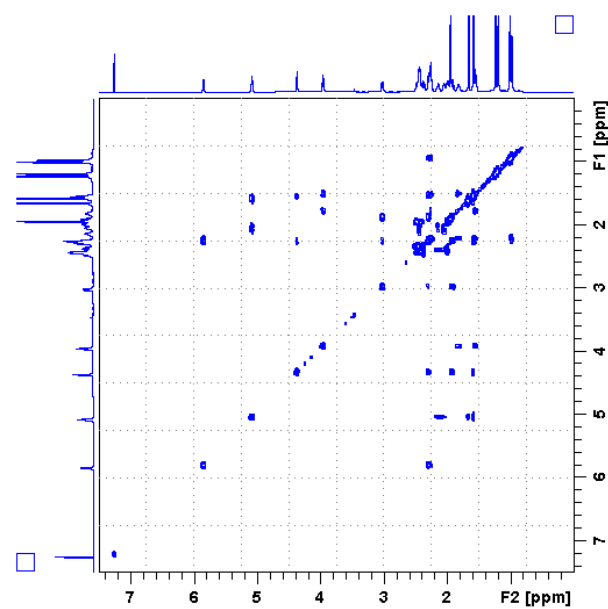

F

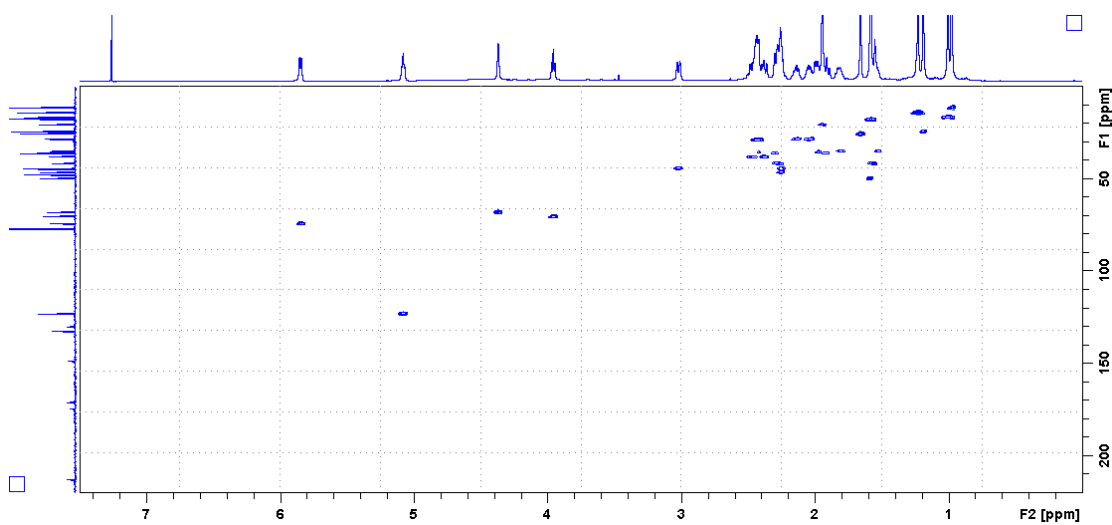

G

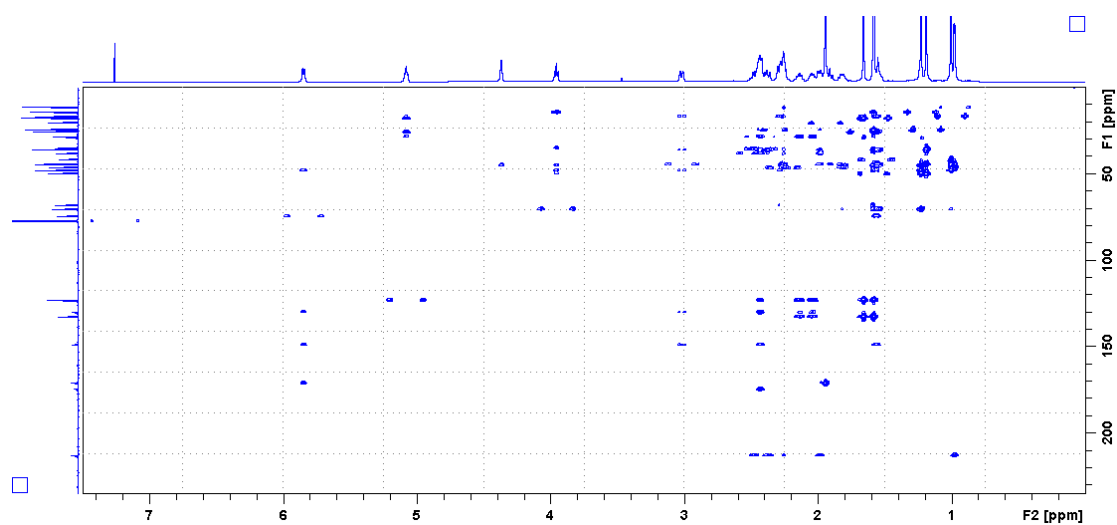

H

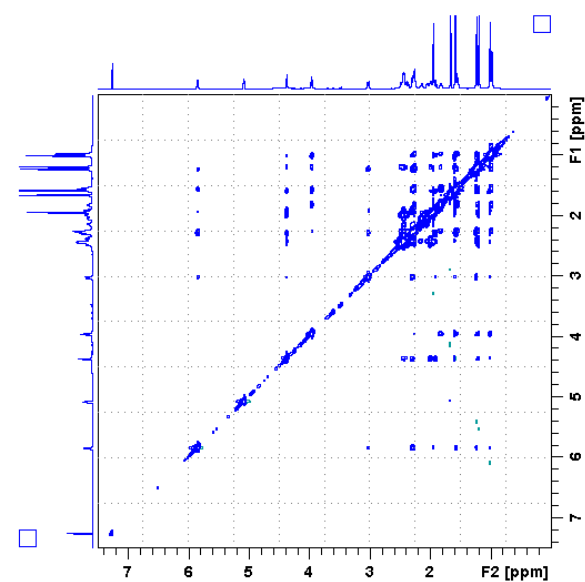

**Figure S16** HRESIMS and NMR spectra of **21**.

(A) HRESIMS spectrum; (B)  $^1\text{H}$  NMR spectrum in  $\text{CDCl}_3$  at 600 MHz; (C)  $^{13}\text{C}$  NMR spectrum in  $\text{CDCl}_3$  at 150 MHz; (D) DEPT 135 spectrum in  $\text{CDCl}_3$  at 150 MHz; (E)  $^1\text{H}$ - $^1\text{H}$  COSY spectrum in  $\text{CDCl}_3$  at 600 MHz; (F) HSQC spectrum in  $\text{CDCl}_3$  at 600 MHz; (G) HMBC spectrum in  $\text{CDCl}_3$  at 600 MHz; (H) NOESY spectrum in  $\text{CDCl}_3$  at 600 MHz.

A

Monoisotopic Mass, Even Electron Ions  
 295 formula(e) evaluated with 2 results within limits (up to 50 closest results for each mass)  
 Elements Used:  
 C: 0-500 H: 0-1000 O: 0-200 Na: 0-1  
 47  
 20190107\_52 220 (1.780)

1: TOF MS ES+  
 2.77e+004

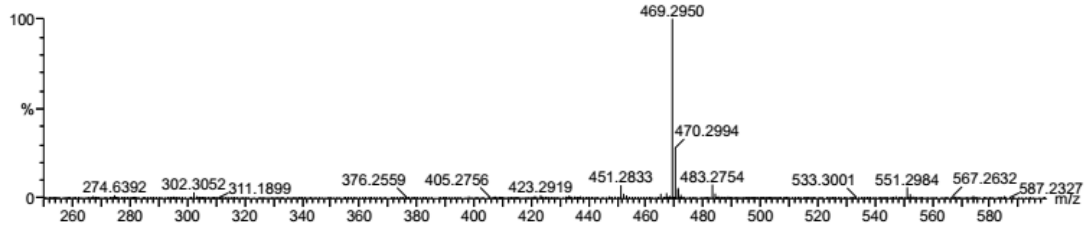

Minimum: -1.5  
 Maximum: 5.0 5.0 50.0

| Mass     | Calc. Mass | mDa  | PPM  | DBE  | i-FIT | Norm  | Conf(%) | Formula       |
|----------|------------|------|------|------|-------|-------|---------|---------------|
| 551.2984 | 551.2985   | -0.1 | -0.2 | 9.5  | 53.1  | 0.273 | 76.13   | C31 H44 O7 Na |
|          | 551.3009   | -2.5 | -4.5 | 12.5 | 54.3  | 1.432 | 23.87   | C33 H43 O7    |

B

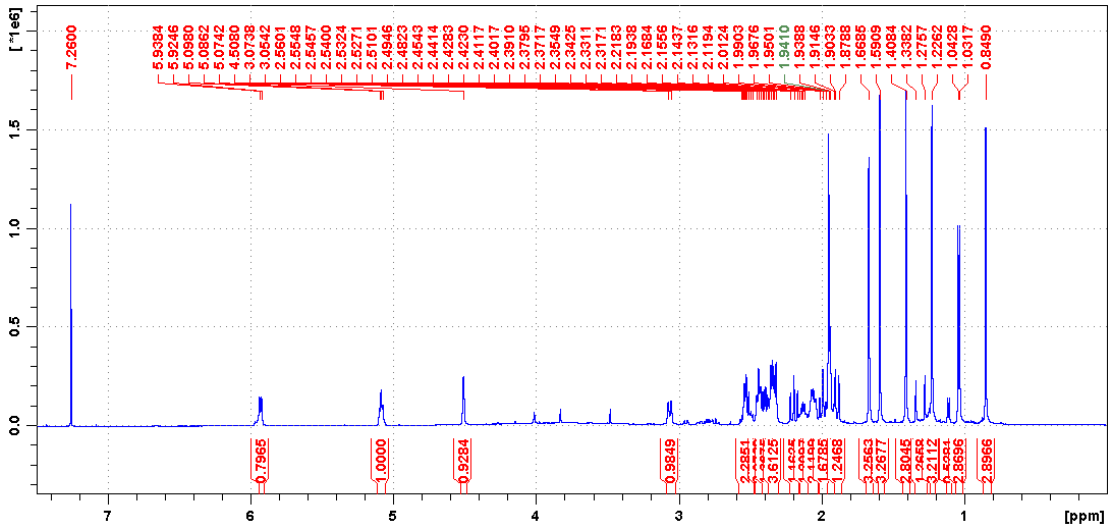

C

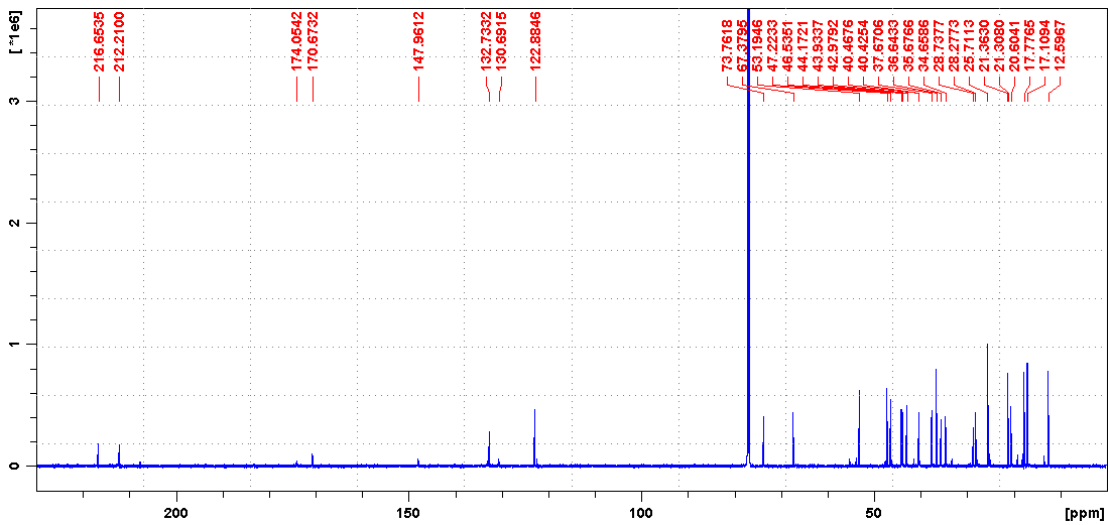

D

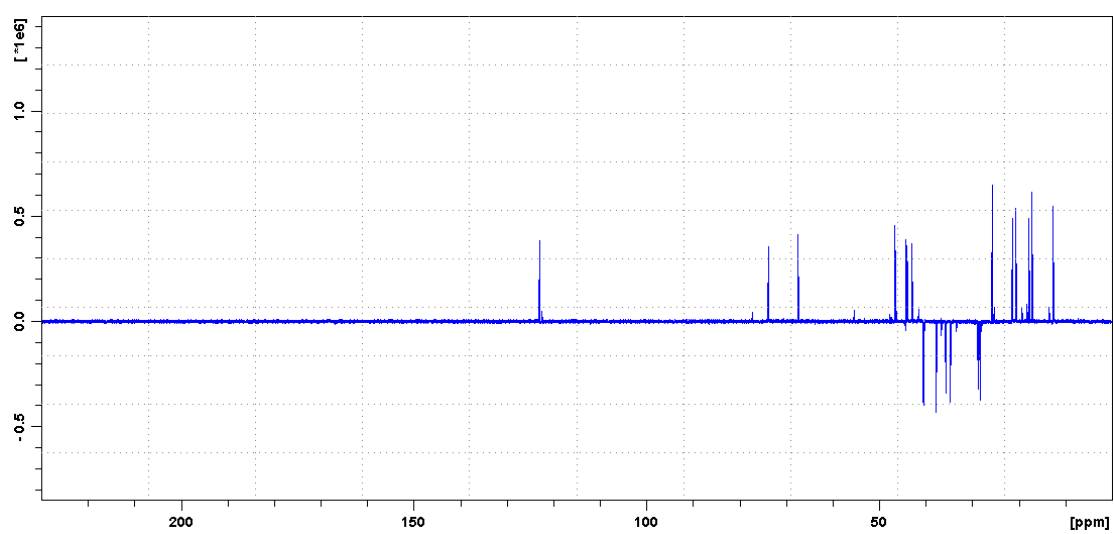

E

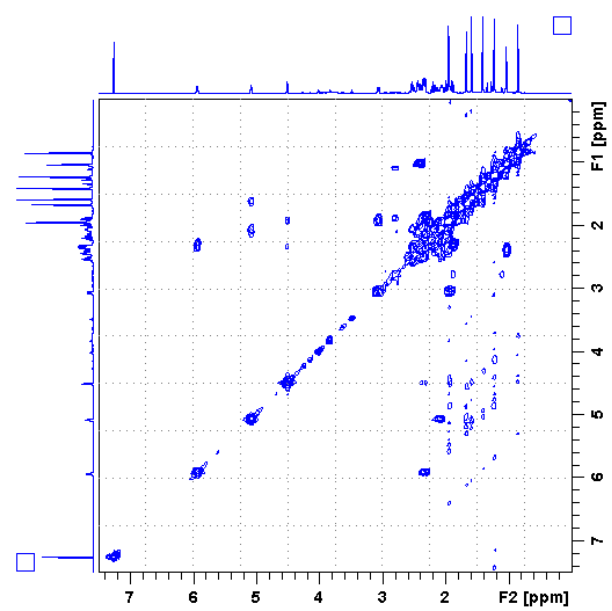

F

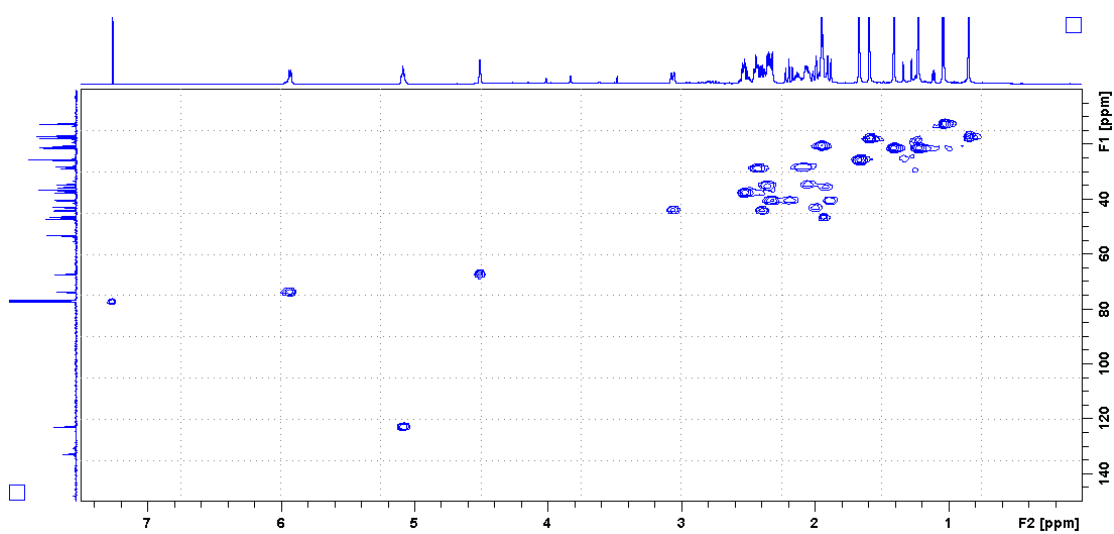

G

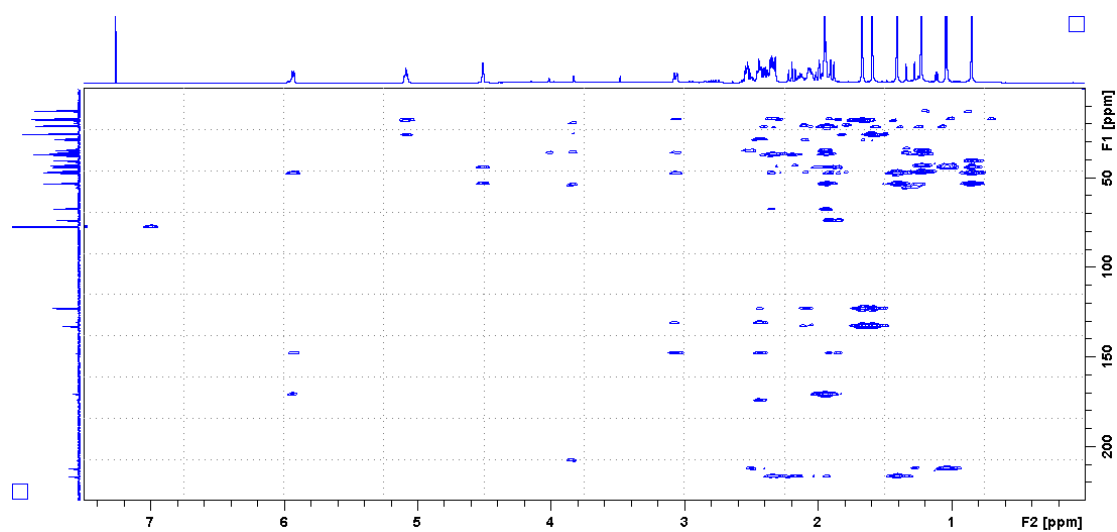

H

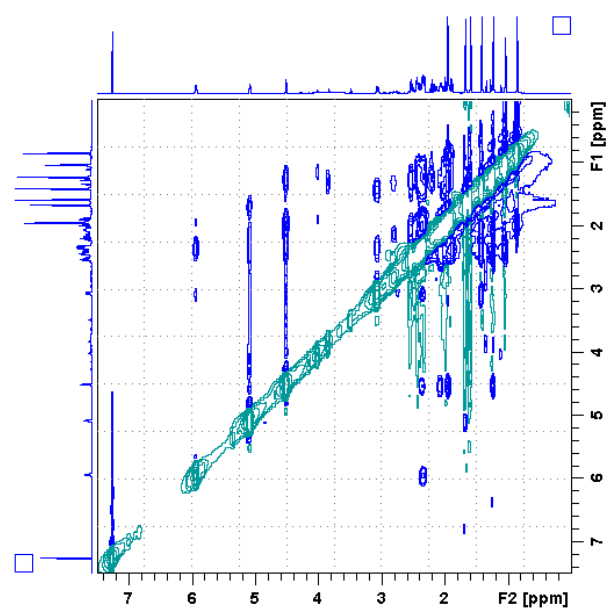

**Figure S17** HRESIMS and NMR spectra of **22**.

(A) HRESIMS spectrum; (B)  $^1\text{H}$  NMR spectrum in  $\text{CDCl}_3$  at 600 MHz; (C)  $^{13}\text{C}$  NMR spectrum in  $\text{CDCl}_3$  at 150 MHz; (D) DEPT 135 spectrum in  $\text{CDCl}_3$  at 150 MHz; (E)  $^1\text{H}$ - $^1\text{H}$  COSY spectrum in  $\text{CDCl}_3$  at 400 MHz; (F) HSQC spectrum in  $\text{CDCl}_3$  at 400 MHz; (G) HMBC spectrum in  $\text{CDCl}_3$  at 400 MHz; (H) ROESY spectrum in  $\text{CDCl}_3$  at 400 MHz.

A

Monoisotopic Mass, Even Electron Ions  
 285 formula(e) evaluated with 2 results within limits (up to 50 closest results for each mass)

Elements Used:

C: 0-500 H: 0-1000 O: 0-200 Na: 0-1

40

20190107\_44 224 (1.810)

1: TOF MS ES+  
 2.24e+005

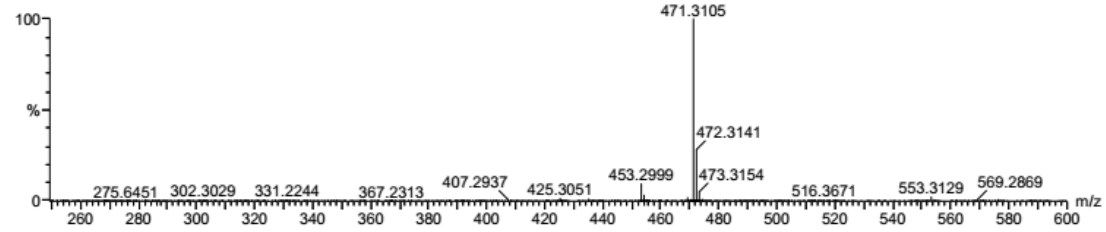

Minimum: -1.5  
 Maximum: 5.0 5.0 50.0

| Mass     | Calc. Mass | mDa  | PPM  | DBE  | i-FIT | Norm  | Conf (%) | Formula       |
|----------|------------|------|------|------|-------|-------|----------|---------------|
| 553.3129 | 553.3141   | -1.2 | -2.2 | 8.5  | 45.7  | 0.085 | 91.90    | C31 H46 O7 Na |
|          | 553.3107   | 2.2  | 4.0  | 20.5 | 48.2  | 2.513 | 8.10     | C40 H41 O2    |

B

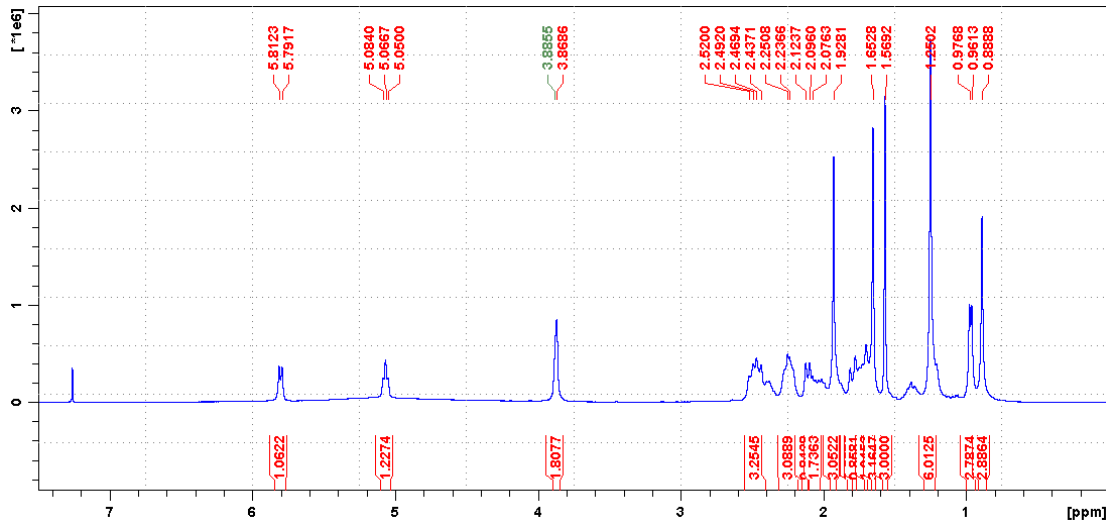

C

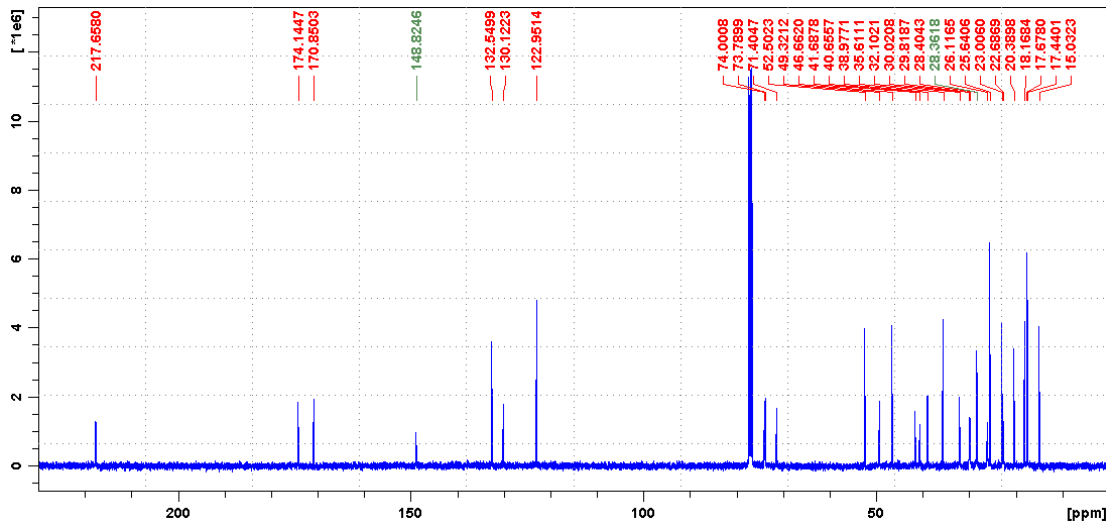

D

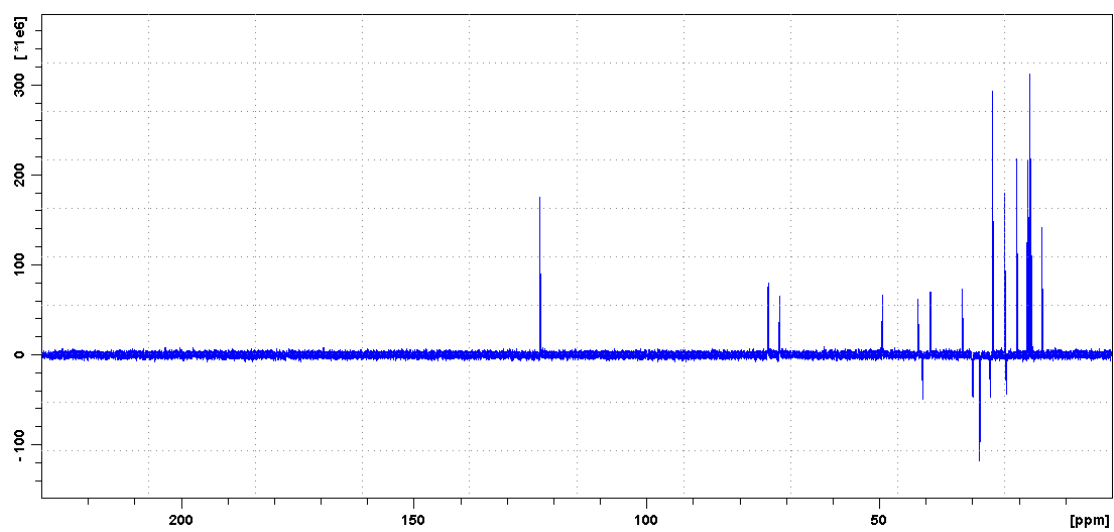

E

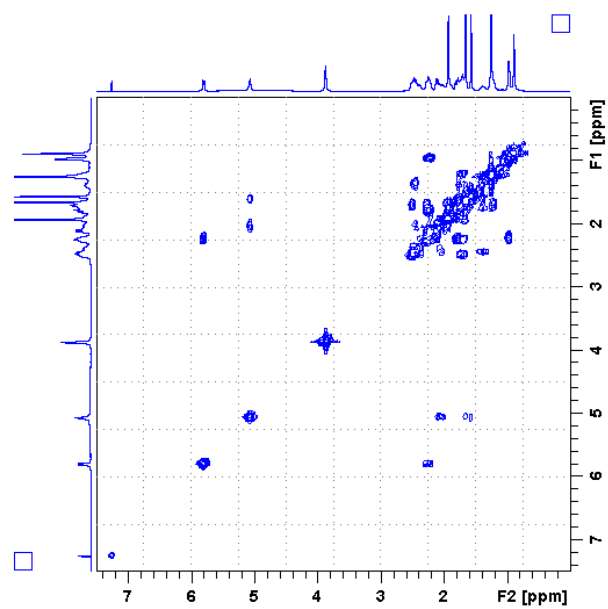

F

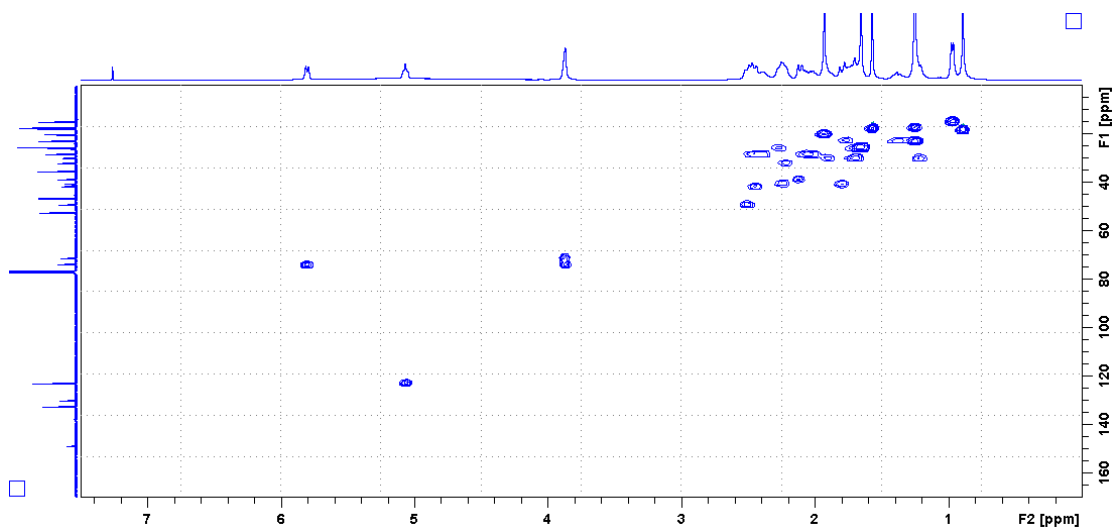



G

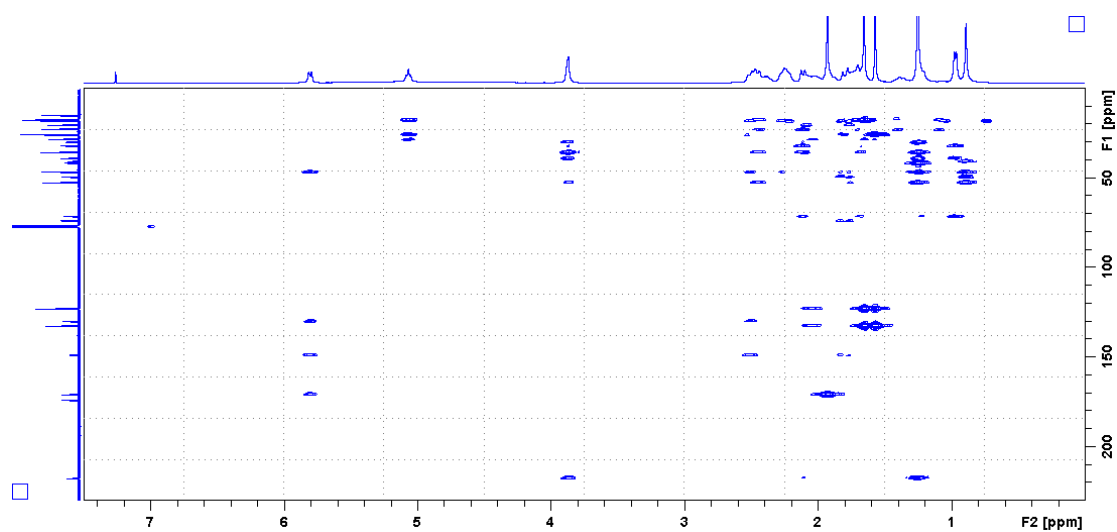

H

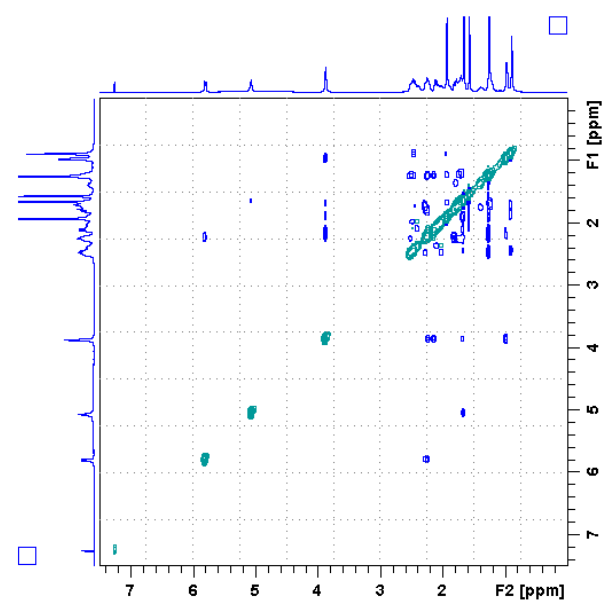

**Figure S18** HRESIMS and NMR spectra of **23**.

(A) HRESIMS spectrum; (B)  $^1\text{H}$  NMR spectrum in  $\text{CDCl}_3$  at 400 MHz; (C)  $^{13}\text{C}$  NMR spectrum in  $\text{CDCl}_3$  at 100 MHz; (D) DEPT 135 spectrum in  $\text{CDCl}_3$  at 100 MHz; (E)  $^1\text{H}$ - $^1\text{H}$  COSY spectrum in  $\text{CDCl}_3$  at 400 MHz; (F) HSQC spectrum in  $\text{CDCl}_3$  at 400 MHz; (G) HMBC spectrum in  $\text{CDCl}_3$  at 400 MHz; (H) ROESY spectrum in  $\text{CDCl}_3$  at 400 MHz.

A

Monoisotopic Mass, Even Electron Ions  
 283 formula(e) evaluated with 2 results within limits (up to 50 closest results for each mass)  
 Elements Used:  
 C: 0-500 H: 0-1000 O: 0-200 Na: 0-1  
 EC1B3-2-7  
 2018061120 242 (1.956)

1: TOF MS ES+  
 2.47e+005

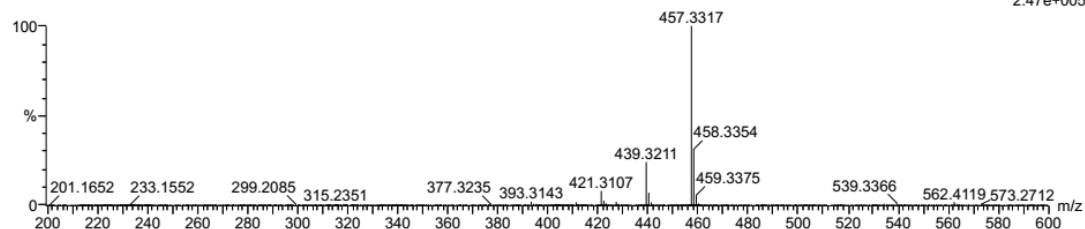

Minimum: -1.5  
 Maximum: 5.0 5.0 50.0

| Mass     | Calc. Mass | mDa  | PPM  | DBE  | i-FIT | Norm  | Conf (%) | Formula       |
|----------|------------|------|------|------|-------|-------|----------|---------------|
| 539.3366 | 539.3349   | 1.7  | 3.2  | 7.5  | 101.6 | 0.110 | 89.57    | C31 H48 O6 Na |
|          | 539.3373   | -0.7 | -1.3 | 10.5 | 103.8 | 2.261 | 10.43    | C33 H47 O6    |

B

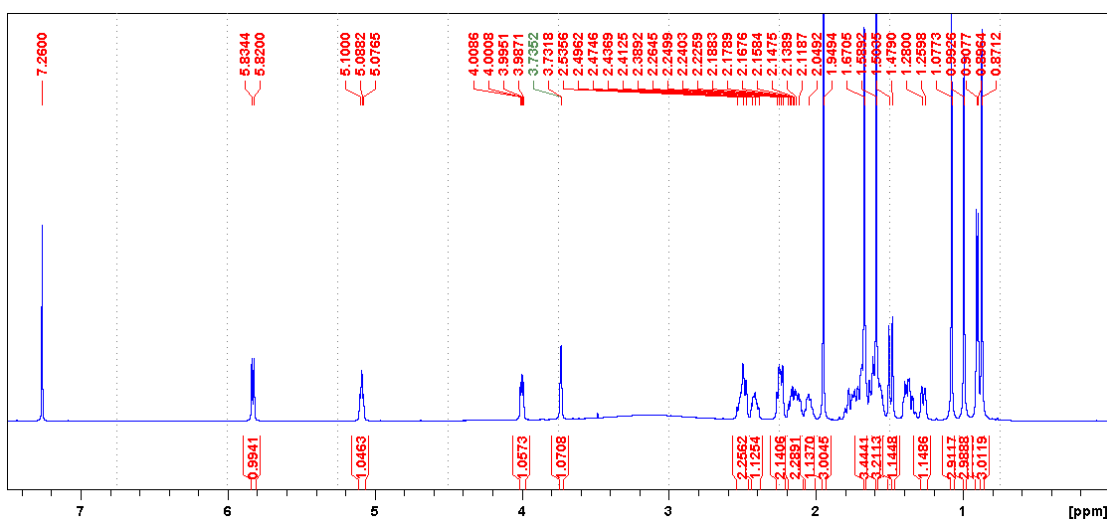

C

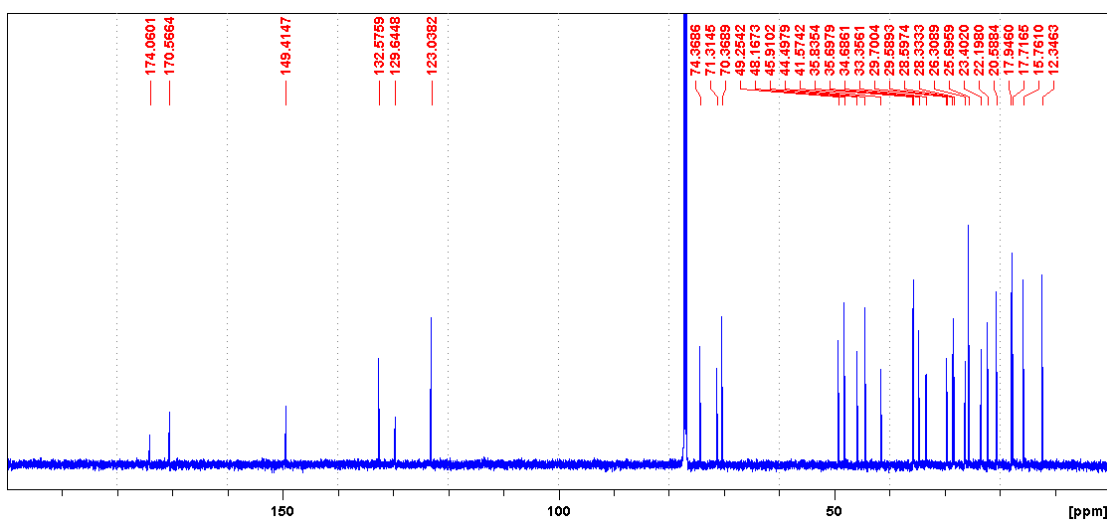

D

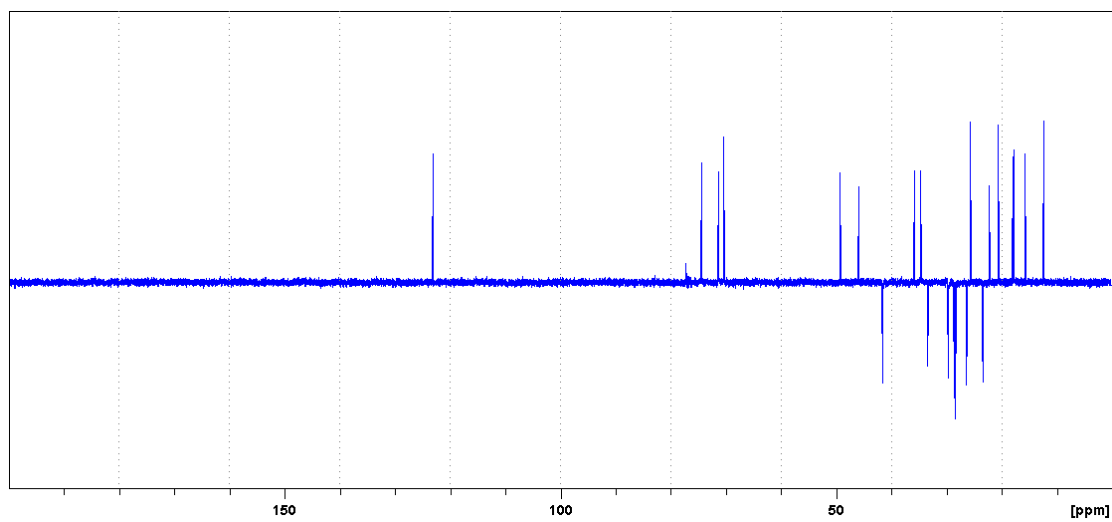

E

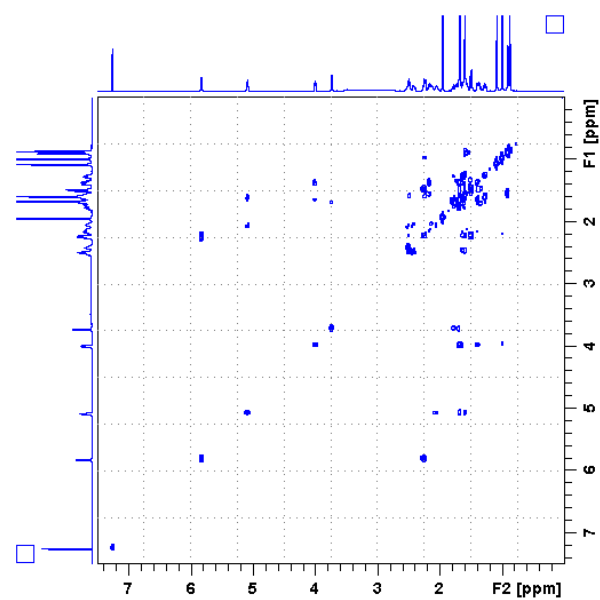

F

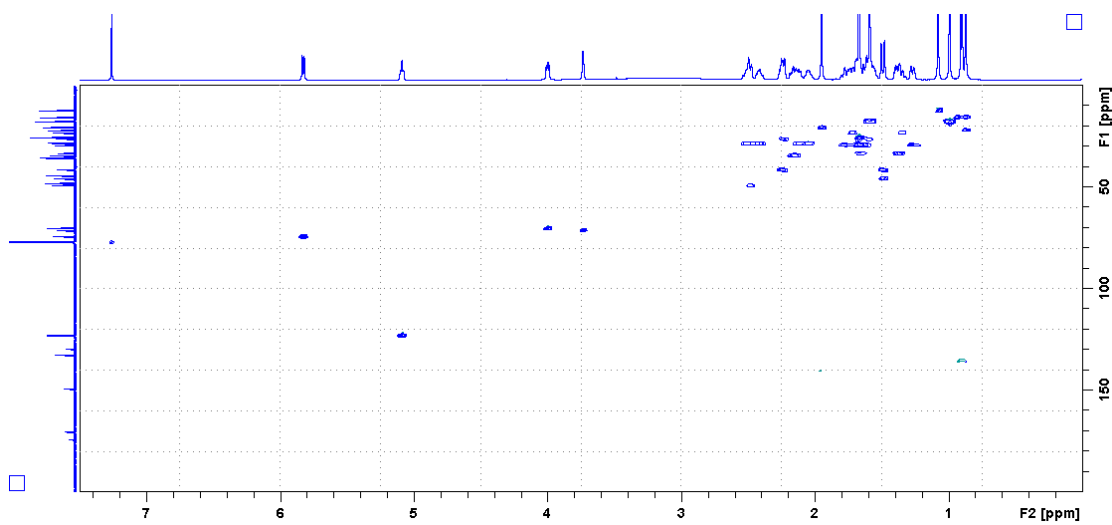

G

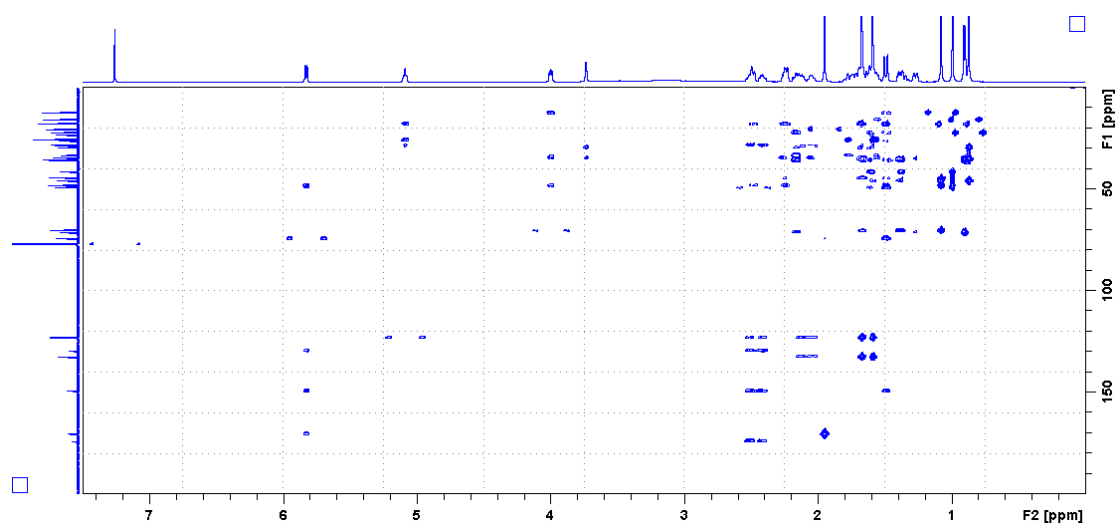

H

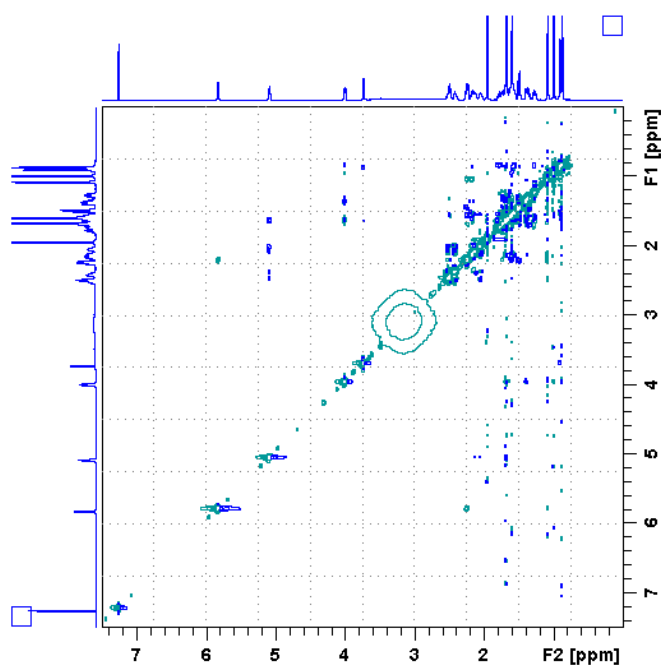

**Figure S19** HRESIMS and NMR spectra of **24**.

(A) HRESIMS spectrum; (B)  $^1\text{H}$  NMR spectrum in  $\text{CDCl}_3$  at 600 MHz; (C)  $^{13}\text{C}$  NMR spectrum in  $\text{CDCl}_3$  at 150 MHz; (D) DEPT 135 spectrum in  $\text{CDCl}_3$  at 150 MHz; (E)  $^1\text{H}$ - $^1\text{H}$  COSY spectrum in  $\text{CDCl}_3$  at 600 MHz; (F) HSQC spectrum in  $\text{CDCl}_3$  at 600 MHz; (G) HMBC spectrum in  $\text{CDCl}_3$  at 600 MHz; (H) ROESY spectrum in  $\text{CDCl}_3$  at 600 MHz.

A

Monoisotopic Mass, Even Electron Ions  
 270 formula(e) evaluated with 2 results within limits (up to 50 closest results for each mass)  
 Elements Used:  
 C: 0-500 H: 0-1000 O: 0-200 Na: 0-1  
 EC1B3-2-6  
 2018061119 249 (2.008)

1: TOF MS ES+  
 3.54e+005

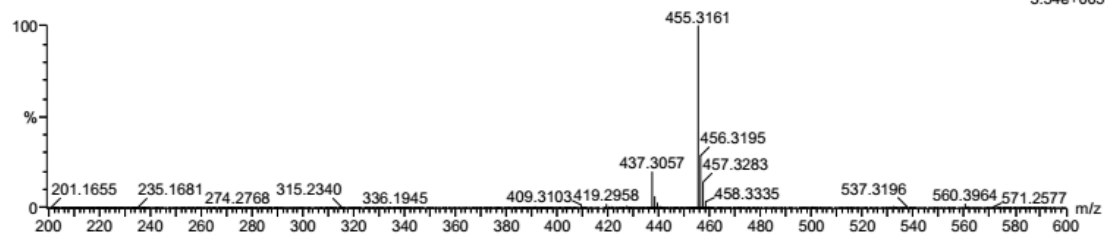

Minimum: -1.5  
 Maximum: 5.0 5.0 50.0

| Mass     | Calc. Mass | mDa  | PPM  | DBE  | i-FIT | Norm  | Conf (%) | Formula       |
|----------|------------|------|------|------|-------|-------|----------|---------------|
| 537.3196 | 537.3192   | 0.4  | 0.7  | 8.5  | 124.0 | 1.106 | 33.07    | C31 H46 O6 Na |
|          | 537.3216   | -2.0 | -3.7 | 11.5 | 123.3 | 0.402 | 66.93    | C33 H45 O6    |

B

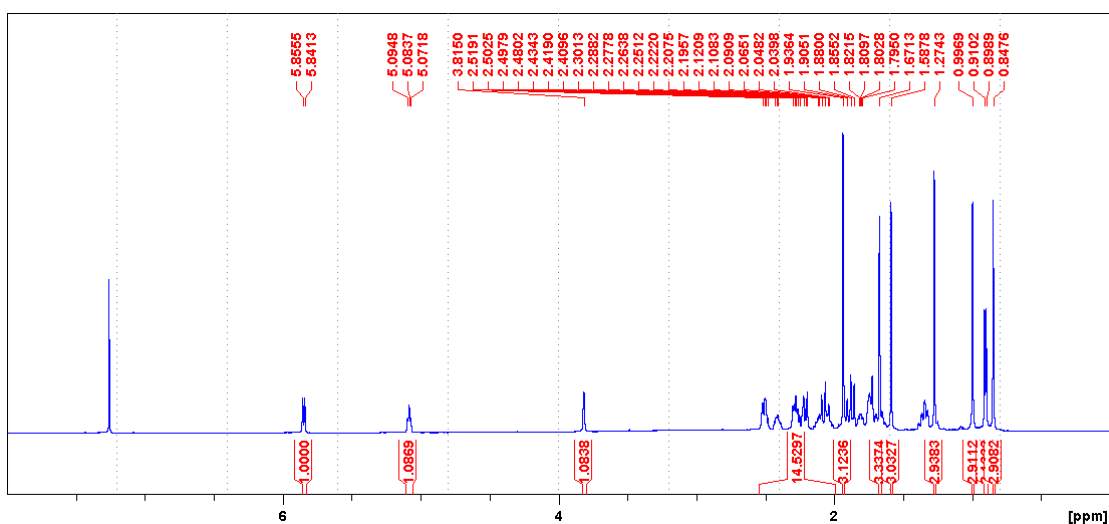

C

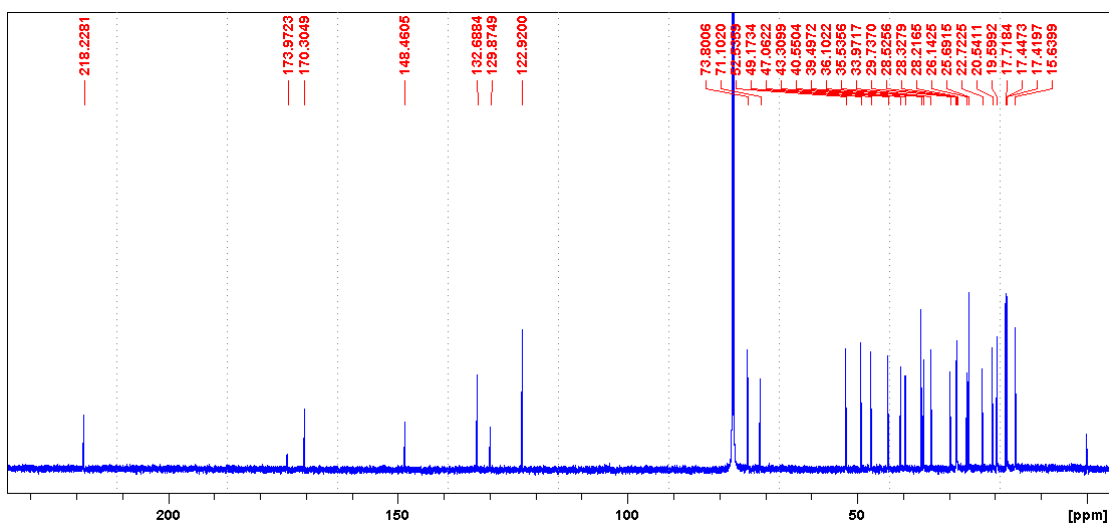

D

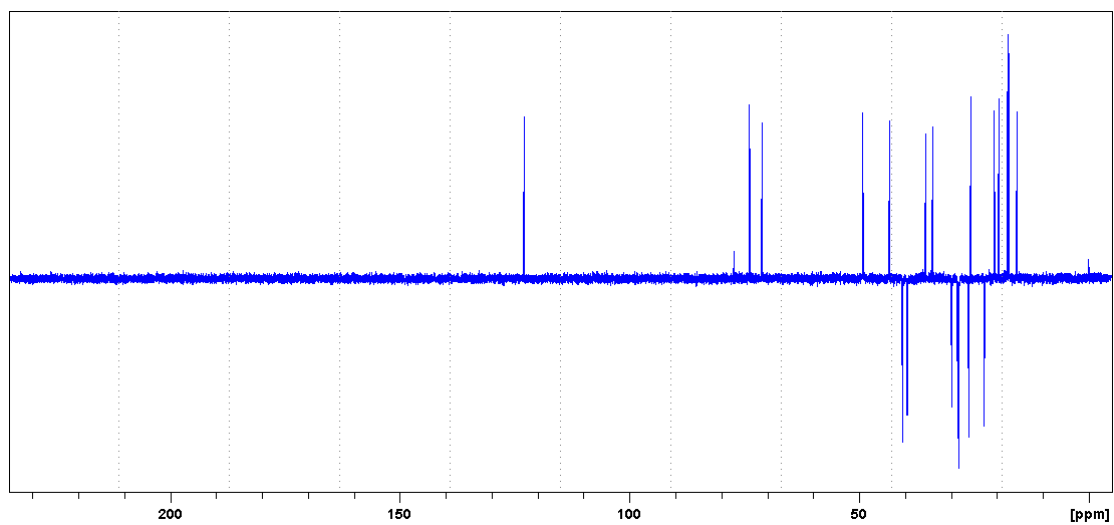

E

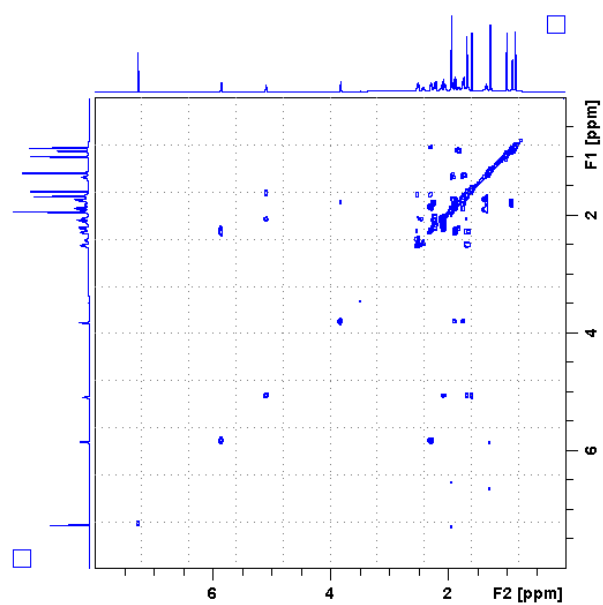

F

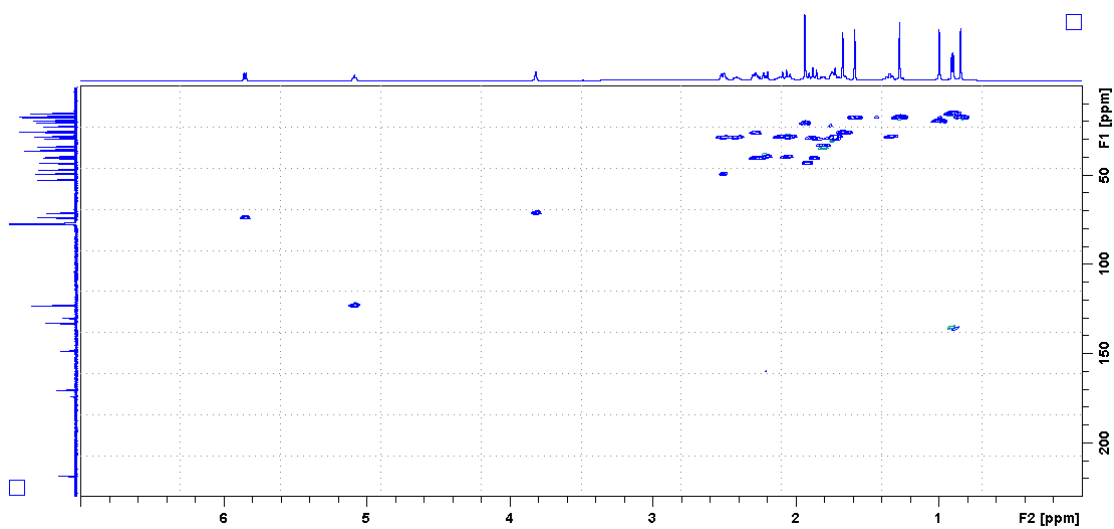

G

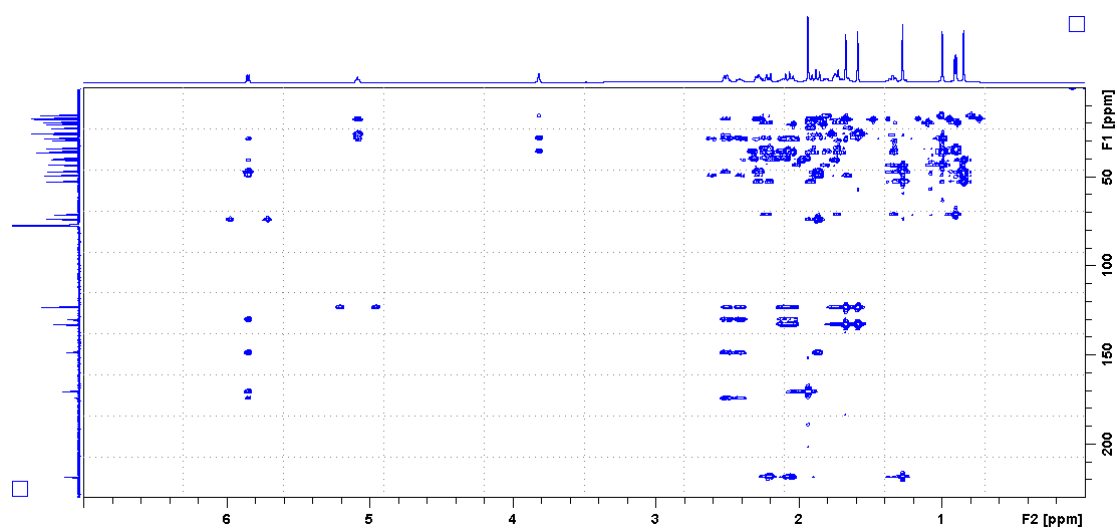

H

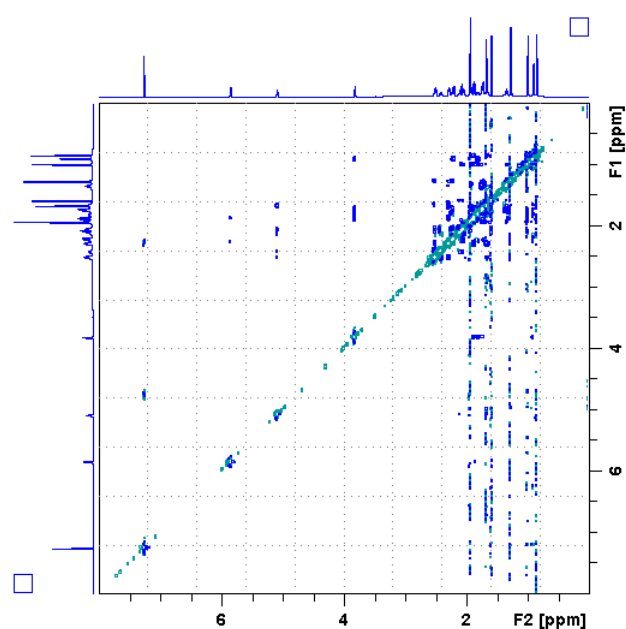

**Figure S20** HRESIMS and NMR spectra of **25**.

(A) HRESIMS spectrum; (B)  $^1\text{H}$  NMR spectrum in  $\text{CDCl}_3$  at 600 MHz; (C)  $^{13}\text{C}$  NMR spectrum in  $\text{CDCl}_3$  at 150 MHz; (D) DEPT 135 spectrum in  $\text{CDCl}_3$  at 150 MHz; (E)  $^1\text{H}$ - $^1\text{H}$  COSY spectrum in  $\text{CDCl}_3$  at 600 MHz; (F) HSQC spectrum in  $\text{CDCl}_3$  at 600 MHz; (G) HMBC spectrum in  $\text{CDCl}_3$  at 600 MHz; (H) NOESY spectrum in  $\text{CDCl}_3$  at 600 MHz.

A

Monoisotopic Mass, Even Electron Ions  
 286 formula(e) evaluated with 2 results within limits (up to 50 closest results for each mass)  
 Elements Used:  
 C: 0-500 H: 0-1000 O: 0-200 Na: 0-1  
 EB1-B3-2  
 20180423-39 195 (1.582)

1: TOF MS ES+  
 6.34e+004

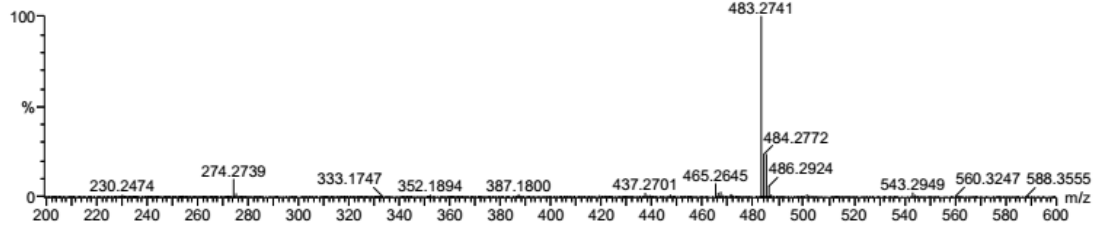

| Mass     | Calc. Mass | mDa  | PPM  | DBE  | i-FIT | Norm  | Conf (%) | Formula       |
|----------|------------|------|------|------|-------|-------|----------|---------------|
| 543.2949 | 543.2958   | -0.9 | -1.7 | 10.5 | 27.4  | 0.244 | 78.35    | C31 H43 O8    |
|          | 543.2934   | 1.5  | 2.8  | 7.5  | 28.7  | 1.530 | 21.65    | C29 H44 O8 Na |

B

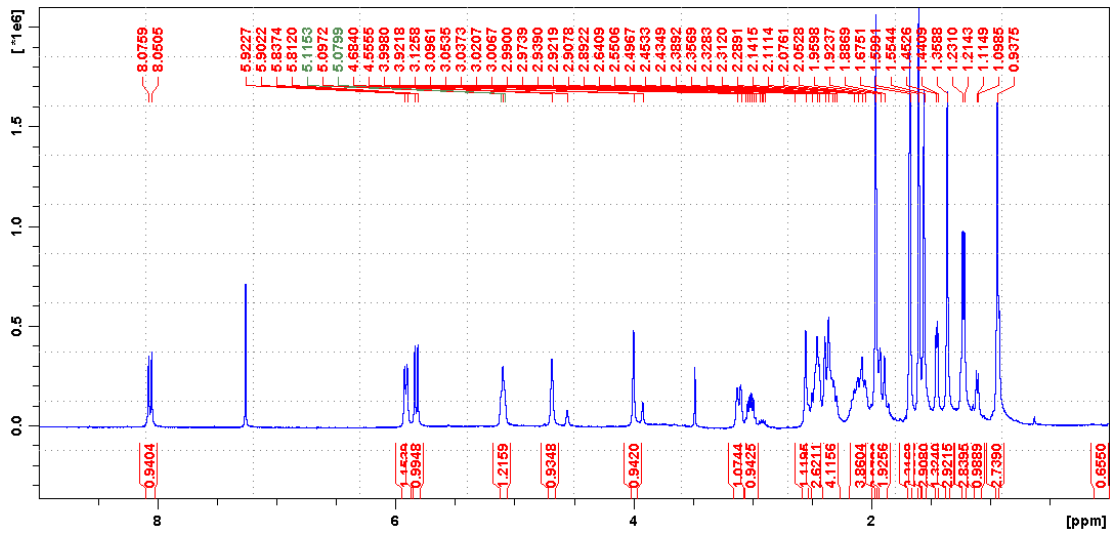

C

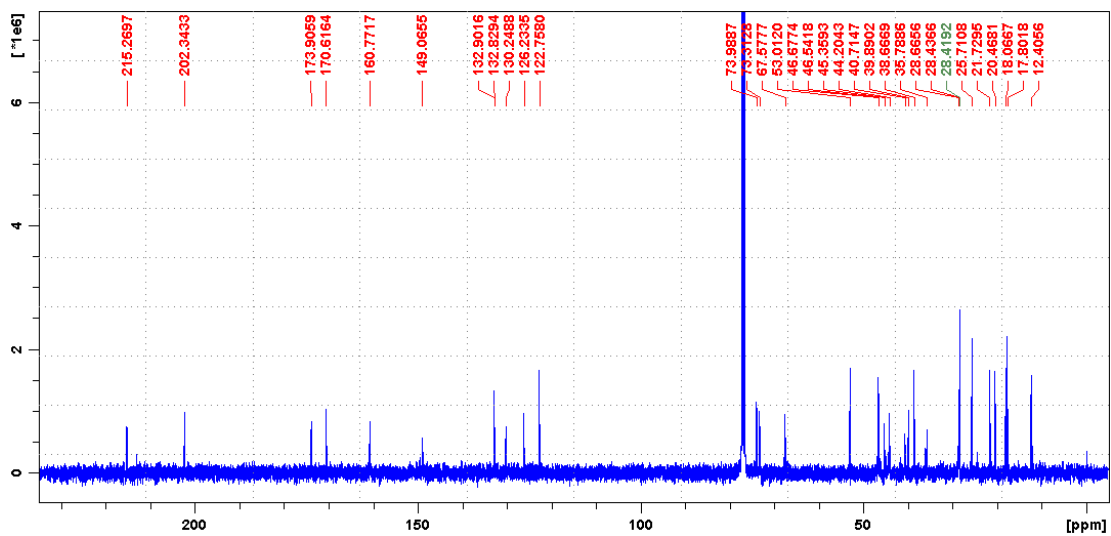



D

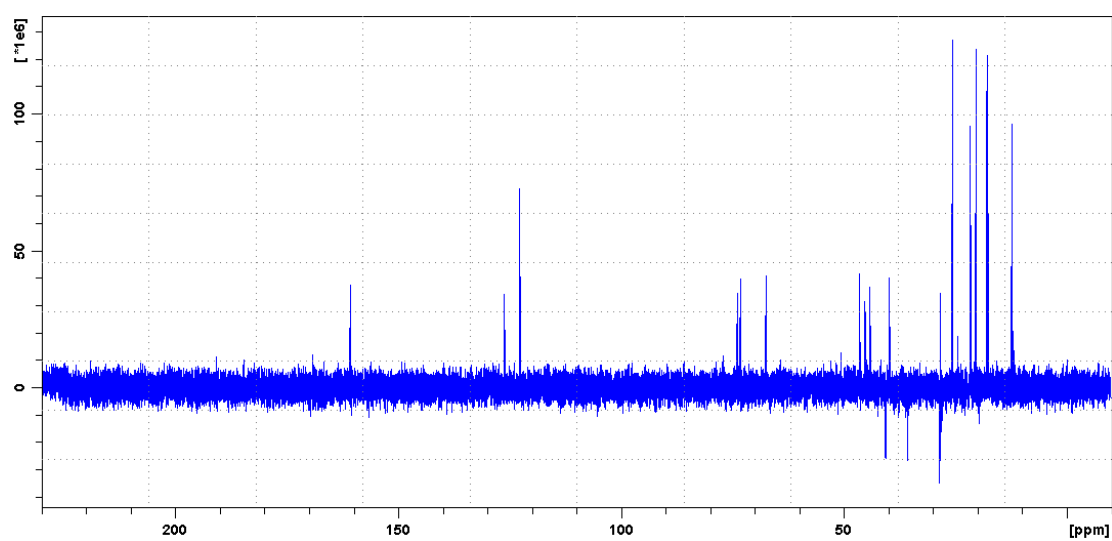

E

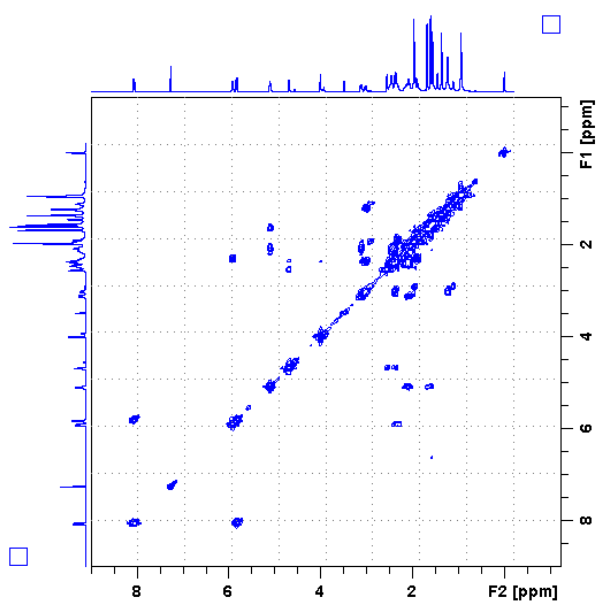

F

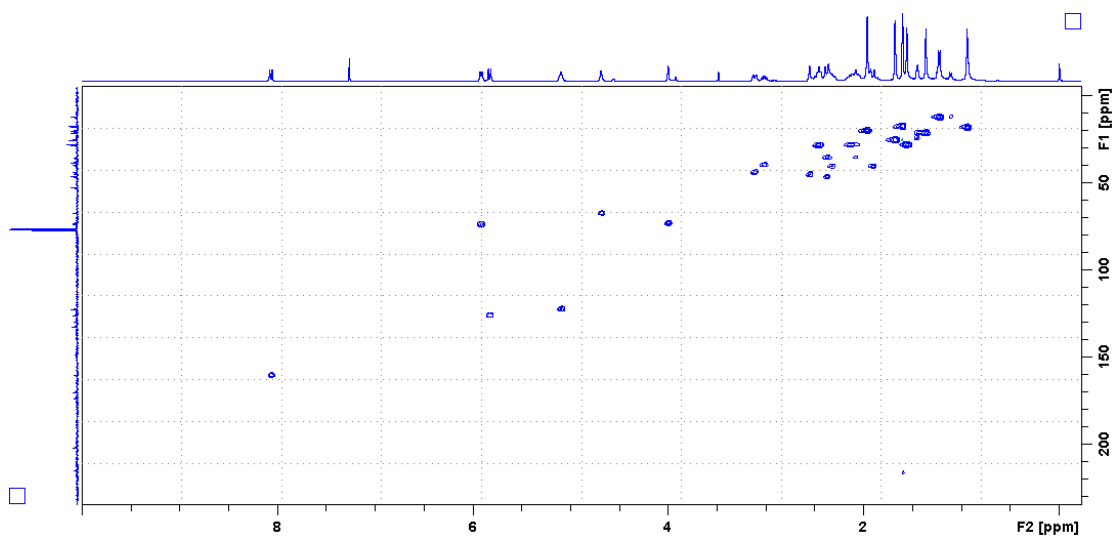

G

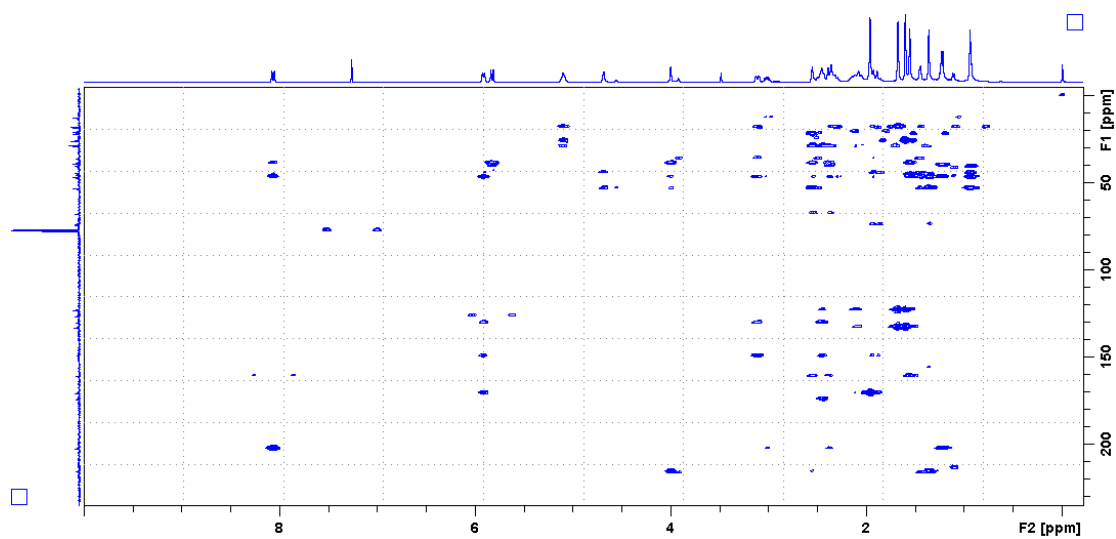

H

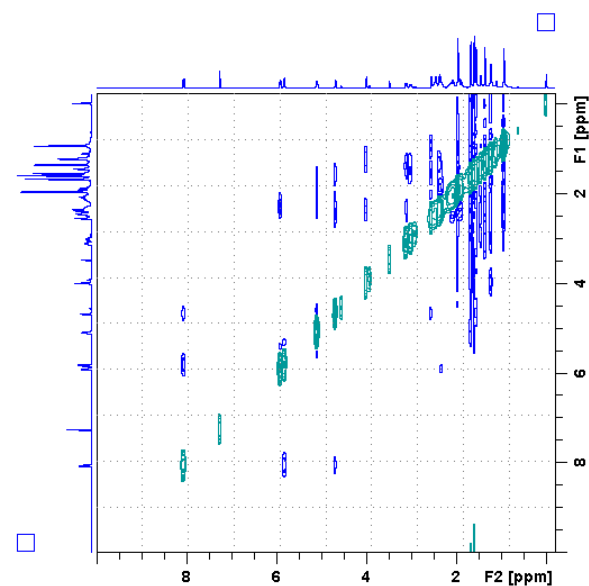

**Figure S21** HRESIMS and NMR spectra of **26**.

(A) HRESIMS spectrum; (B)  $^1\text{H}$  NMR spectrum in  $\text{CDCl}_3$  at 400 MHz; (C)  $^{13}\text{C}$  NMR spectrum in  $\text{CDCl}_3$  at 100 MHz; (D) DEPT 135 spectrum in  $\text{CDCl}_3$  at 100 MHz; (E)  $^1\text{H}$ - $^1\text{H}$  COSY spectrum in  $\text{CDCl}_3$  at 400 MHz; (F) HSQC spectrum in  $\text{CDCl}_3$  at 400 MHz; (G) **HMBC spectrum in  $\text{CDCl}_3$  at 400 MHz;** (H) **ROESY spectrum in  $\text{CDCl}_3$  at 400 MHz.**

A

Monoisotopic Mass, Even Electron Ions  
 235 formula(e) evaluated with 1 results within limits (up to 50 closest results for each mass)  
 Elements Used:  
 C: 0-500 H: 0-1000 O: 0-200 Na: 0-1  
 EB1-C1-9-3  
 2018091049 236 (1.900)

1: TOF MS ES+  
 2.27e+005

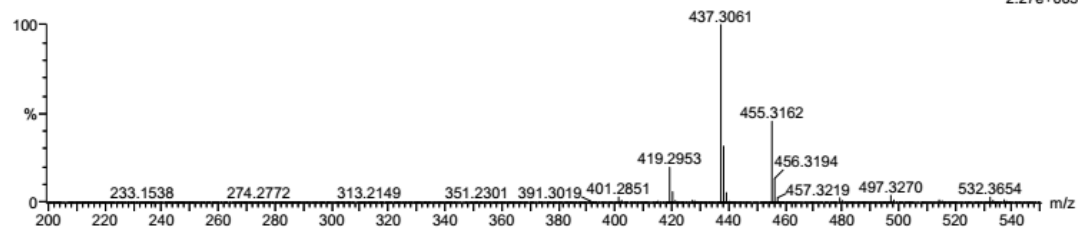

Minimum: -1.5  
 Maximum: 5.0 5.0 50.0

| Mass     | Calc. Mass | mDa | PPM | DBE | i-FIT | Norm | Conf (%) | Formula    |
|----------|------------|-----|-----|-----|-------|------|----------|------------|
| 497.3270 | 497.3267   | 0.3 | 0.6 | 9.5 | 140.8 | n/a  | n/a      | C31 H45 O5 |

B

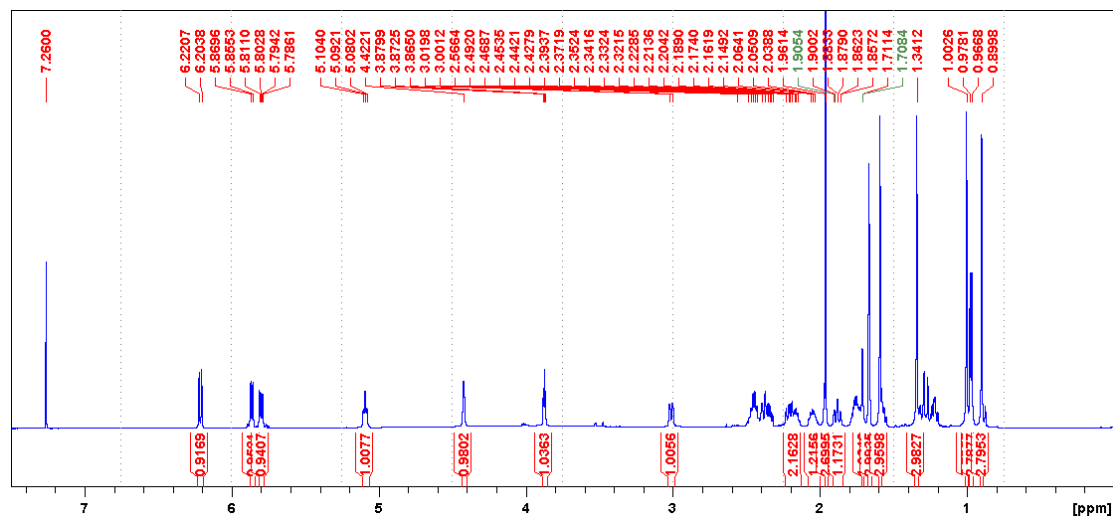

C

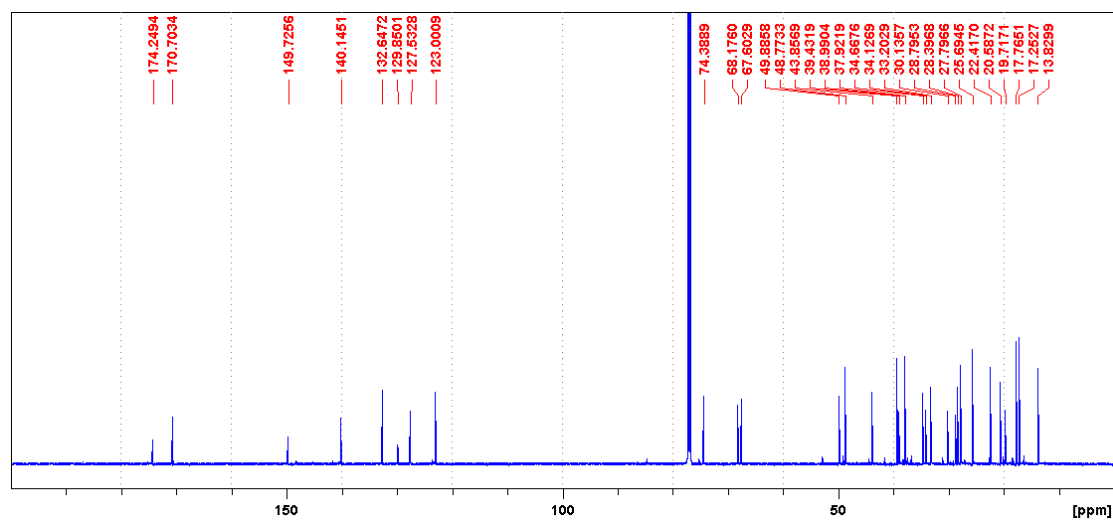

**D**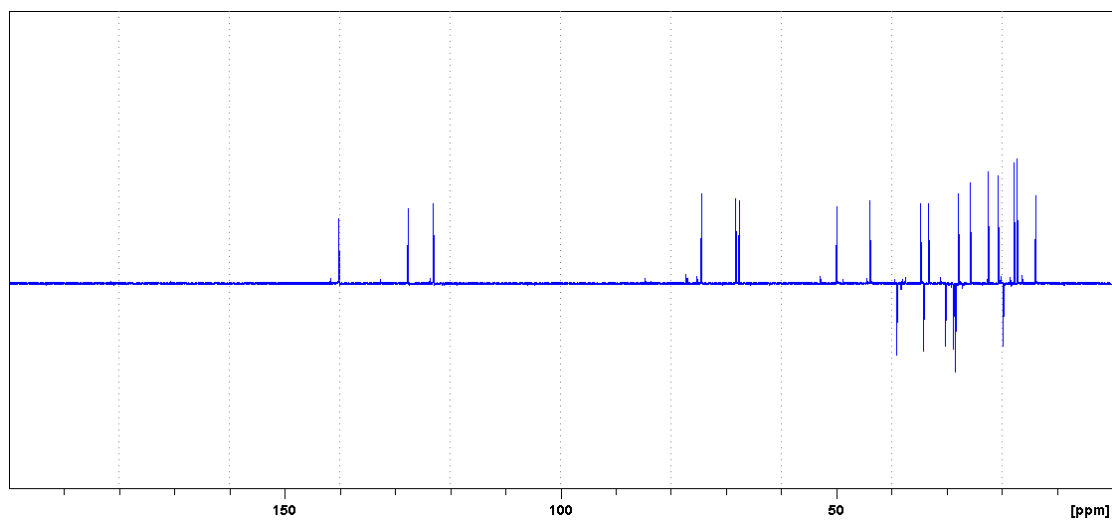**E**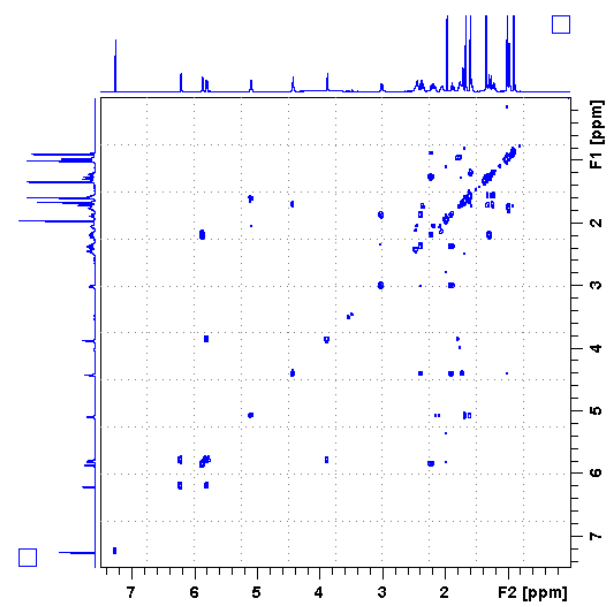**F**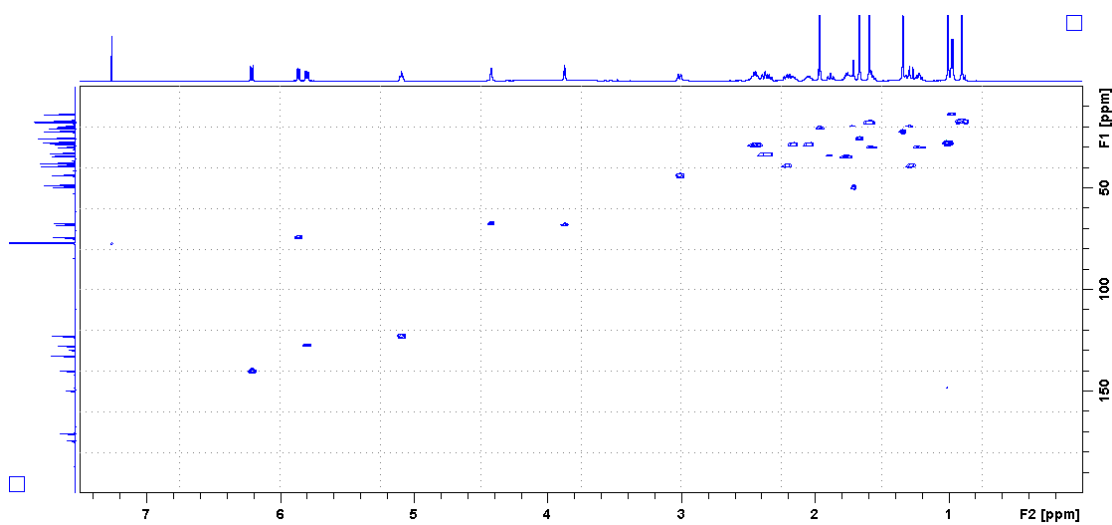

**G**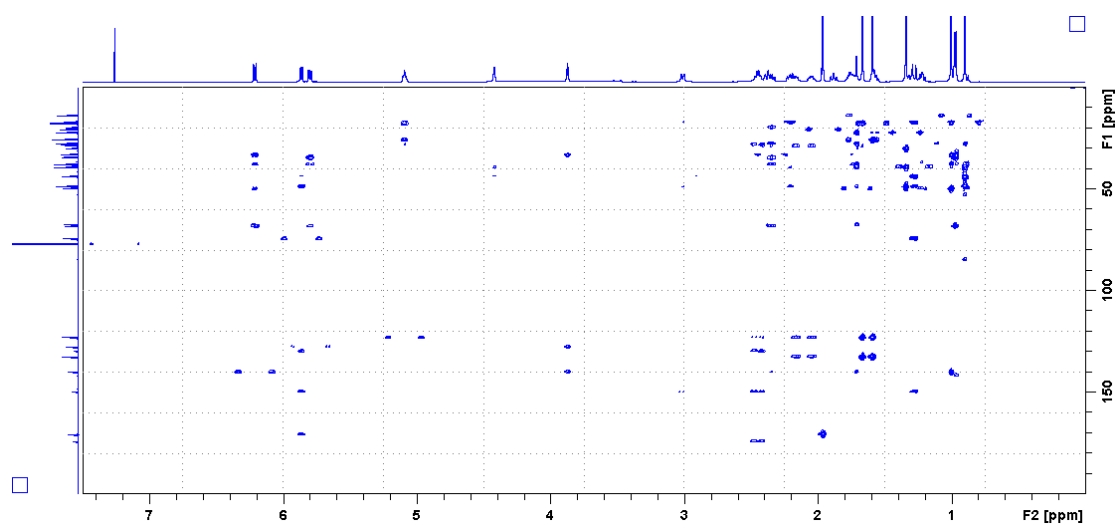**H**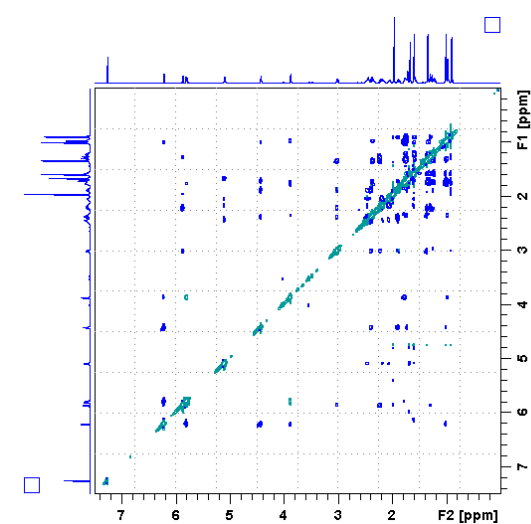

**Figure S22** HRESIMS and NMR spectra of **29**.

(A) HRESIMS spectrum; (B)  $^1\text{H}$  NMR spectrum in  $\text{CDCl}_3$  at 600 MHz; (C)  $^{13}\text{C}$  NMR spectrum in  $\text{CDCl}_3$  at 150 MHz; (D) DEPT 135 spectrum in  $\text{CDCl}_3$  at 150 MHz; (E)  $^1\text{H}$ - $^1\text{H}$  COSY spectrum in  $\text{CDCl}_3$  at 600 MHz; (F) HSQC spectrum in  $\text{CDCl}_3$  at 600 MHz; (G) HMBC spectrum in  $\text{CDCl}_3$  at 600 MHz; (H) ROESY spectrum in  $\text{CDCl}_3$  at 600 MHz.

A

Monoisotopic Mass, Even Electron Ions  
 295 formula(e) evaluated with 1 results within limits (up to 50 closest results for each mass)  
 Elements Used:  
 C: 0-500 H: 0-200 Na: 0-1  
 28  
 20190107\_32 218 (1.765)

1: TOF MS ES+  
 7.28e+04

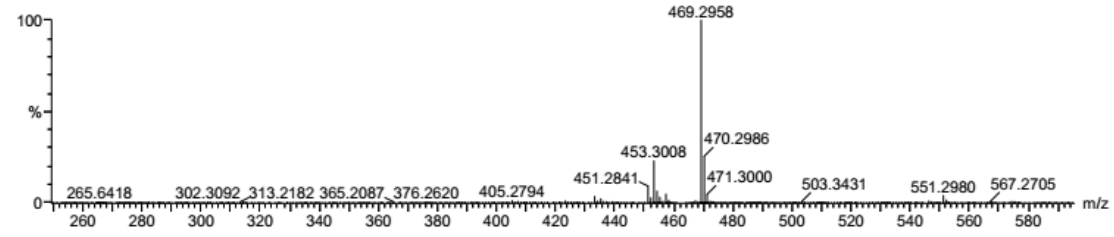

Minimum: -1.5  
 Maximum: 5.0 5.0 50.0

| Mass     | Calc. Mass | mDa  | PPM  | DBE | i-FIT | Norm | Conf (%) | Formula       |
|----------|------------|------|------|-----|-------|------|----------|---------------|
| 551.2980 | 551.2985   | -0.5 | -0.9 | 9.5 | 60.6  | n/a  | n/a      | C31 H44 O7 Na |

B

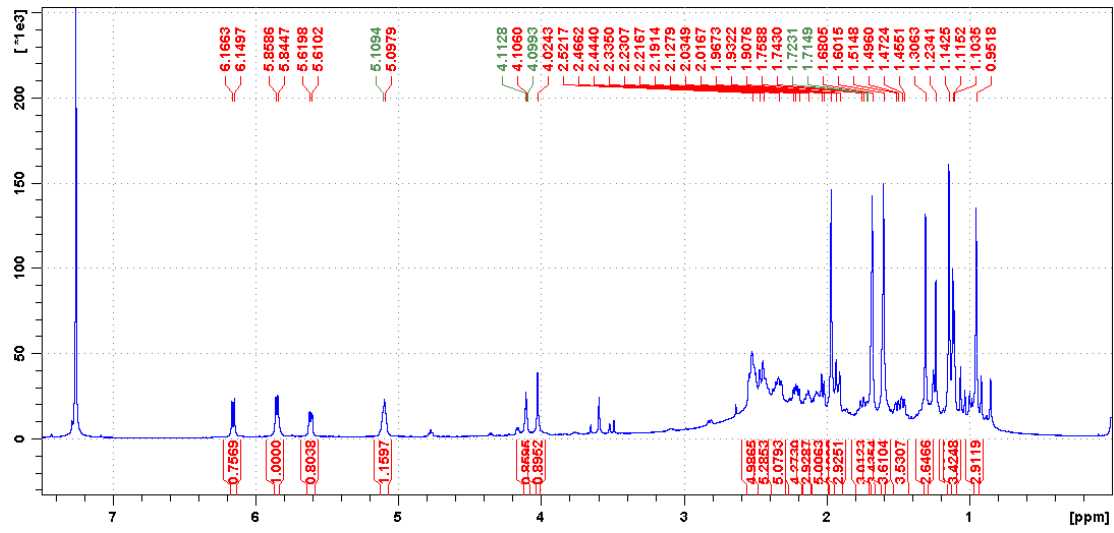

C

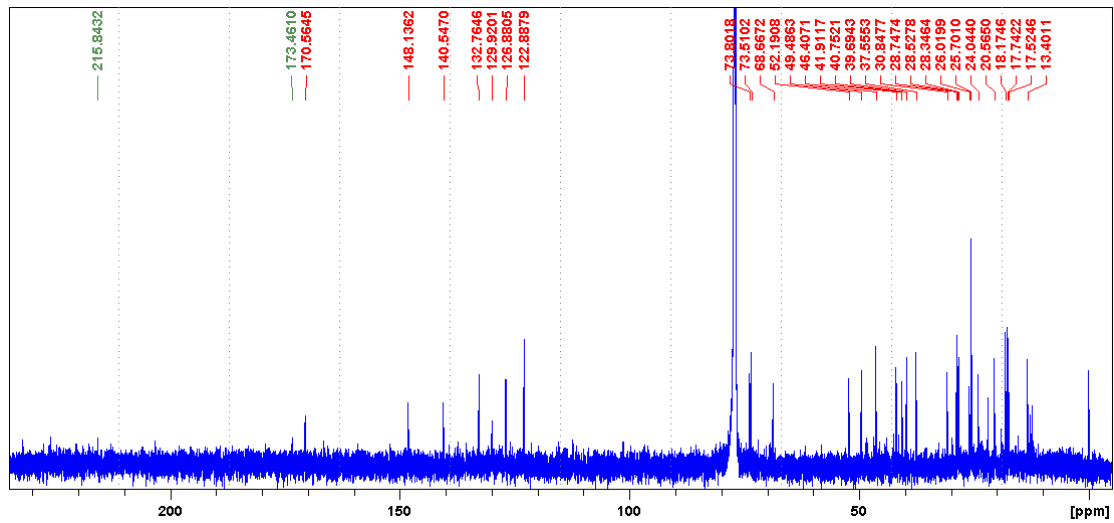

D

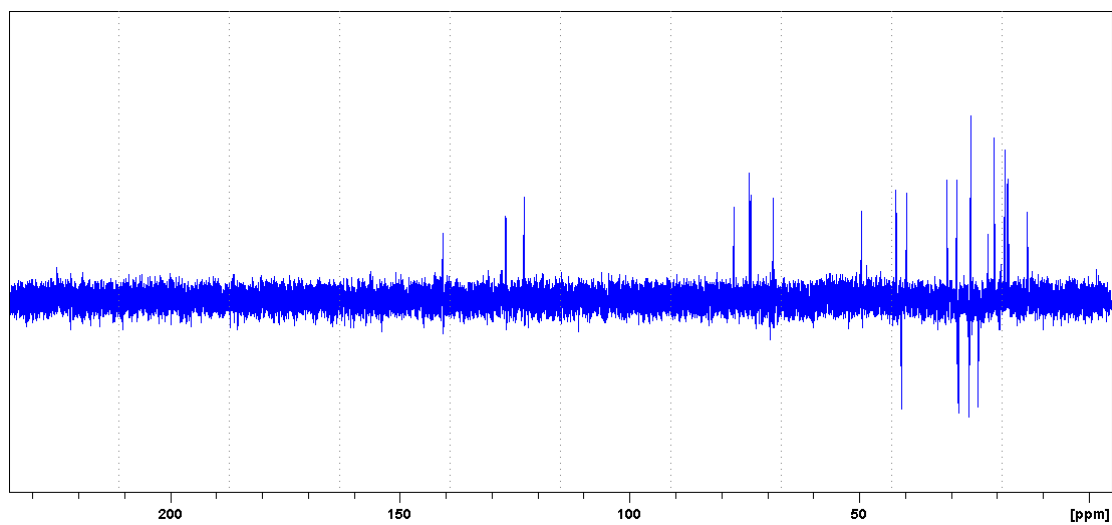

E

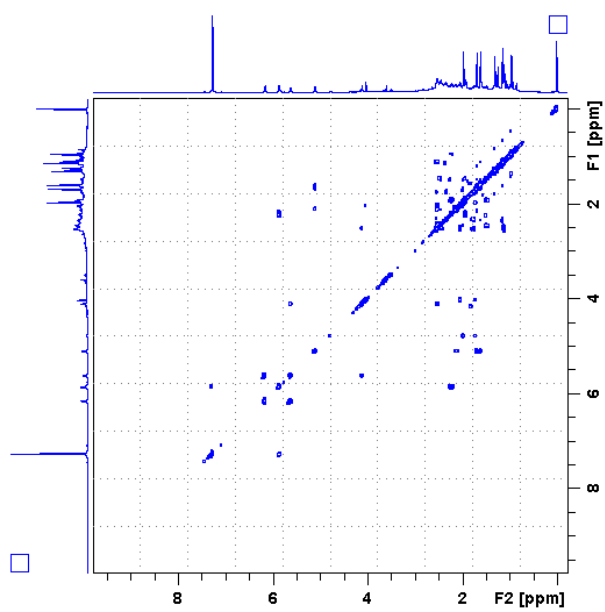

F

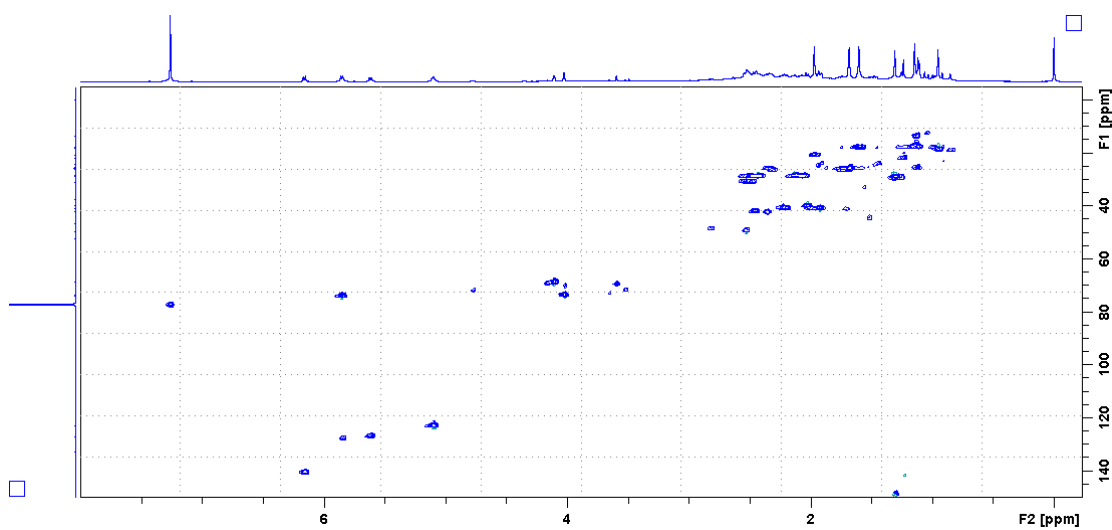

G

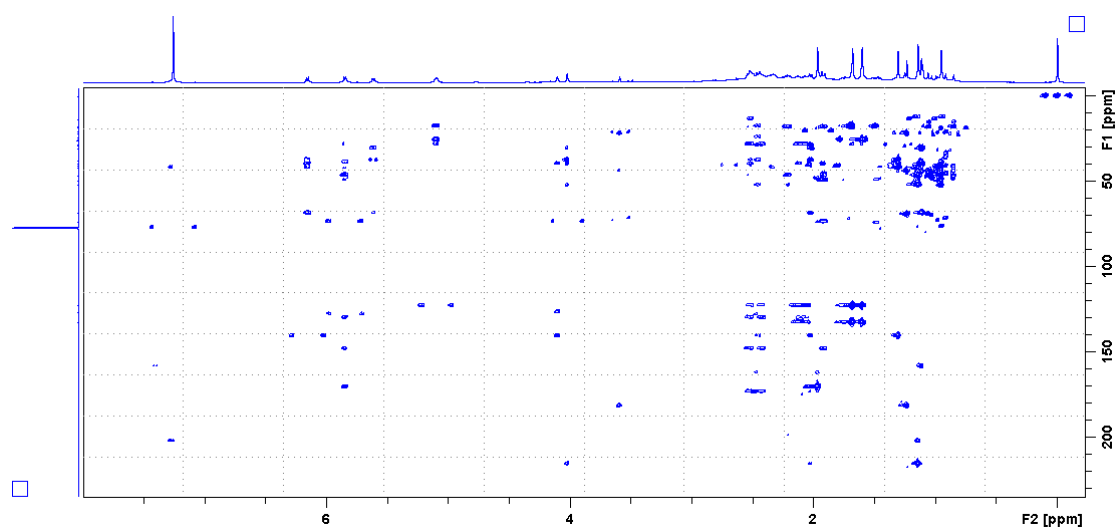

H

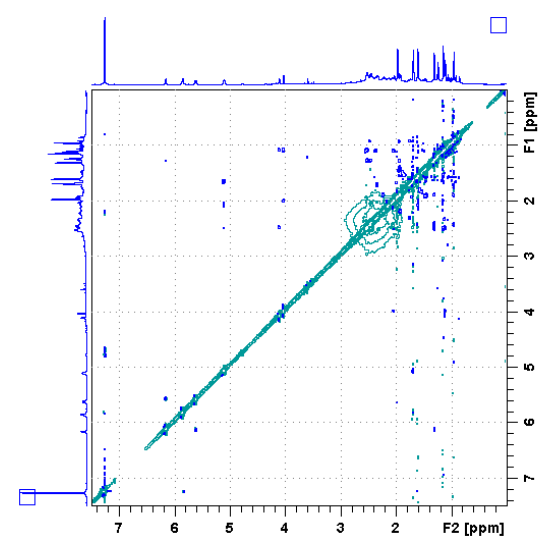

**Figure S23** HRESIMS and NMR spectra of **30**.

(A) HRESIMS spectrum; (B)  $^1\text{H}$  NMR spectrum in  $\text{CDCl}_3$  at 600 MHz; (C)  $^{13}\text{C}$  NMR spectrum in  $\text{CDCl}_3$  at 150 MHz; (D) DEPT 135 spectrum in  $\text{CDCl}_3$  at 150 MHz; (E)  $^1\text{H}$ - $^1\text{H}$  COSY spectrum in  $\text{CDCl}_3$  at 600 MHz; (F) HSQC spectrum in  $\text{CDCl}_3$  at 600 MHz; (G) HMBC spectrum in  $\text{CDCl}_3$  at 600 MHz; (H) NOESY spectrum in  $\text{CDCl}_3$  at 600 MHz.



A

Monoisotopic Mass, Even Electron Ions  
 248 formula(e) evaluated with 2 results within limits (up to 50 closest results for each mass)  
 Elements Used:  
 C: 0-500 H: 0-1000 O: 0-200 Na: 0-1  
 29  
 20190107\_33 237 (1.907)

1: TOF MS ES+  
 5.17e+004

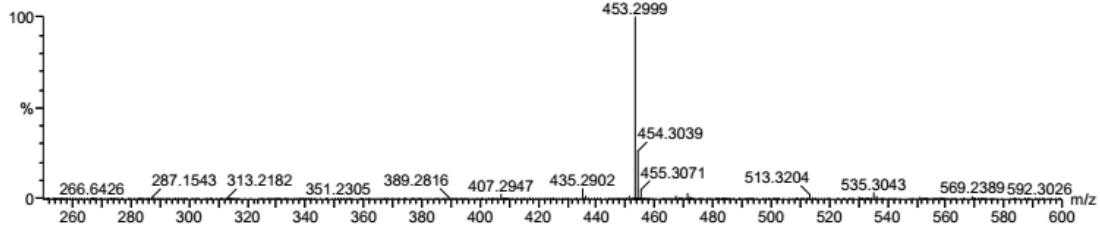

Minimum: -1.5  
 Maximum: 5.0 5.0 50.0

| Mass     | Calc. Mass | mDa  | PPM  | DBE | i-FIT | Norm  | Conf (%) | Formula       |
|----------|------------|------|------|-----|-------|-------|----------|---------------|
| 513.3204 | 513.3216   | -1.2 | -2.3 | 9.5 | 32.5  | 0.749 | 47.26    | C31 H45 O6    |
|          | 513.3192   | 1.2  | 2.3  | 6.5 | 32.4  | 0.640 | 52.74    | C29 H46 O6 Na |

B

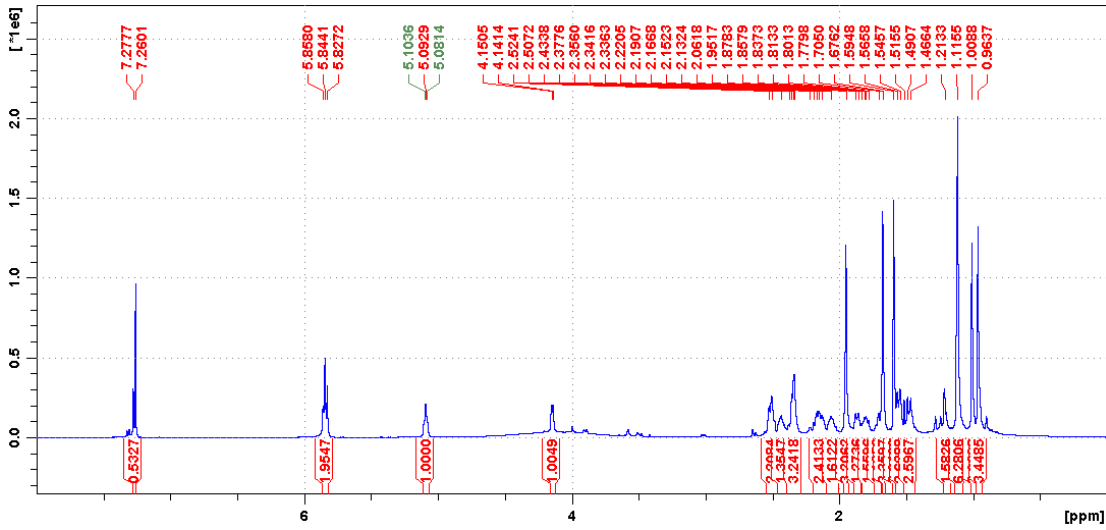

C

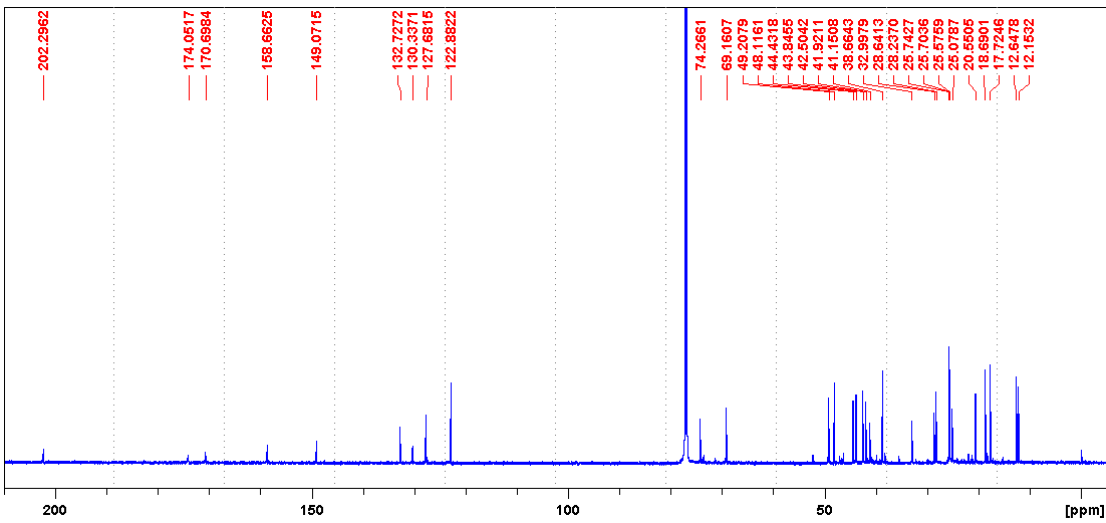

D

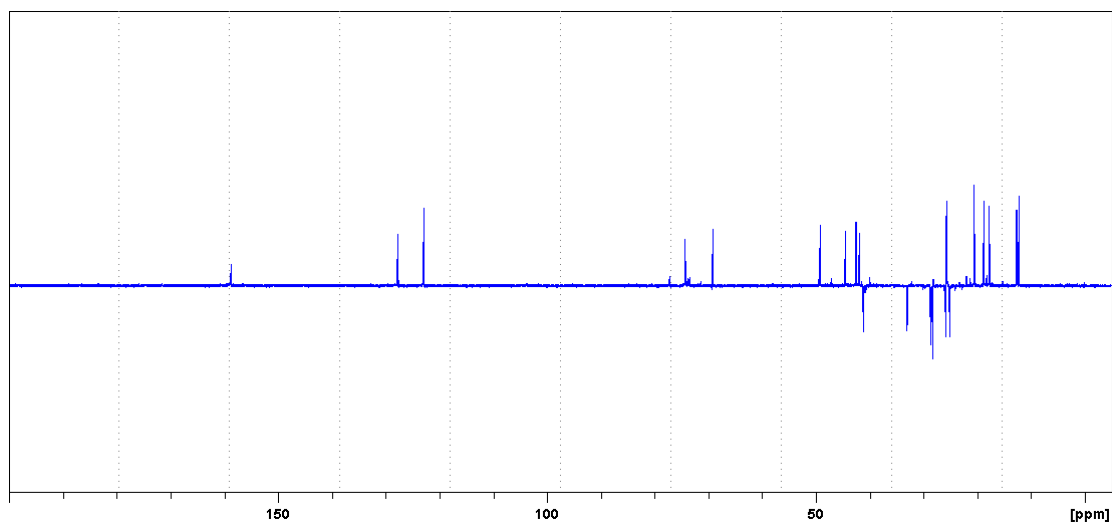

E

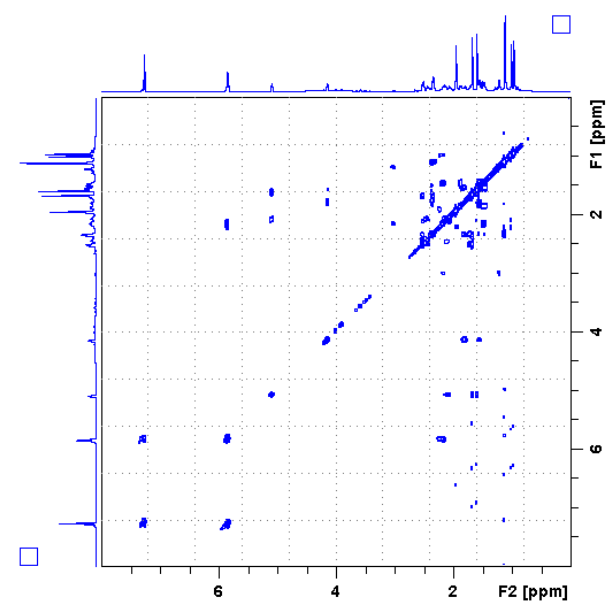

F

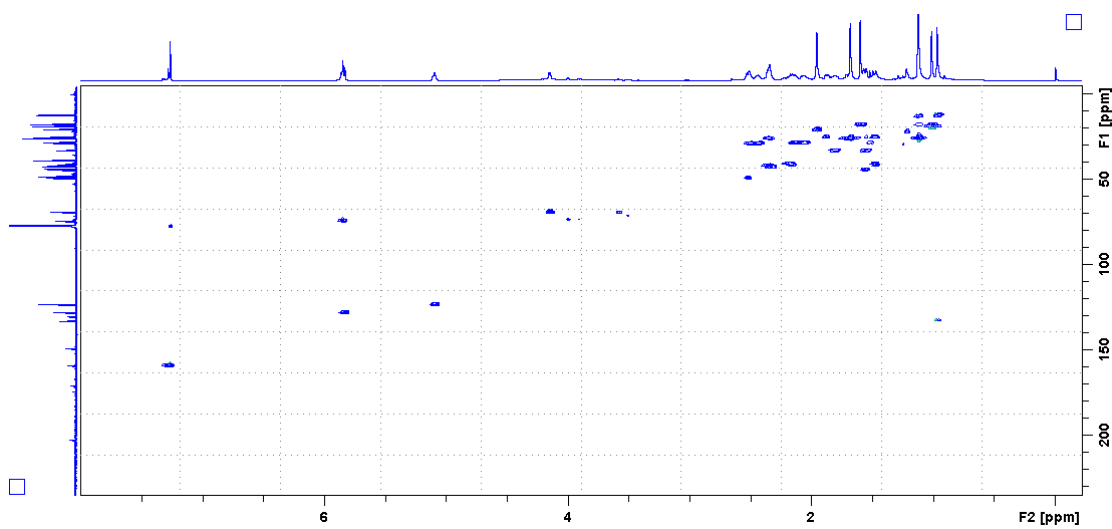

G

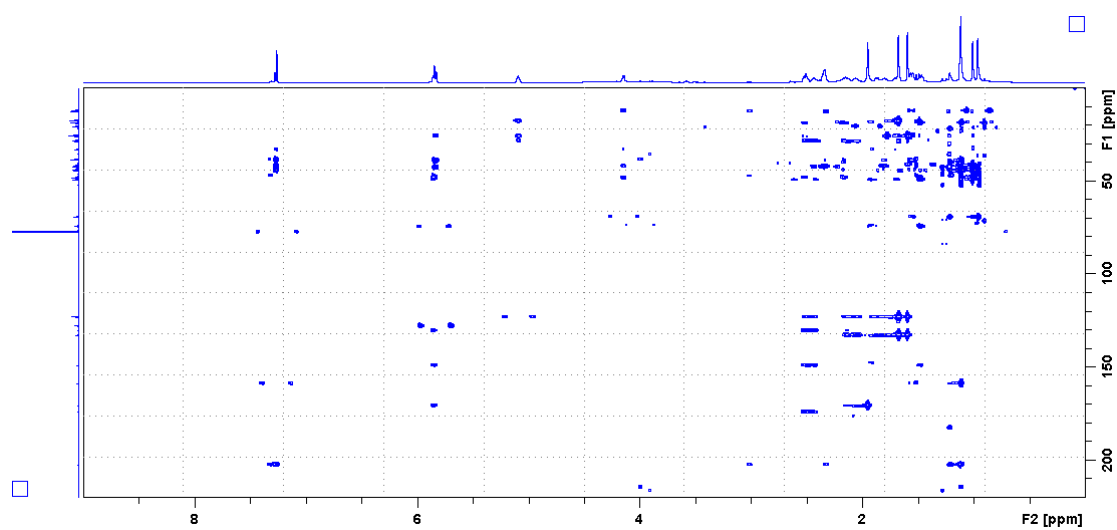

H

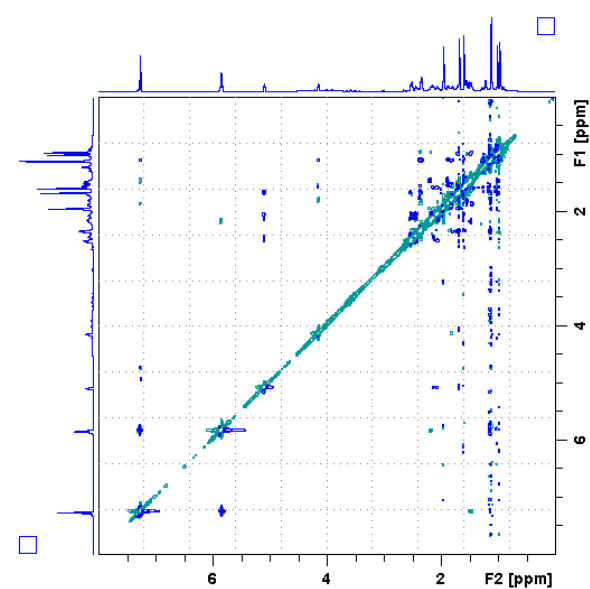

**Figure S24** HRESIMS and NMR spectra of **31**.

(A) HRESIMS spectrum; (B)  $^1\text{H}$  NMR spectrum in  $\text{CDCl}_3$  at 600 MHz; (C)  $^{13}\text{C}$  NMR spectrum in  $\text{CDCl}_3$  at 150 MHz; (D) DEPT 135 spectrum in  $\text{CDCl}_3$  at 150 MHz; (E)  $^1\text{H}$ - $^1\text{H}$  COSY spectrum in  $\text{CDCl}_3$  at 600 MHz; (F) HSQC spectrum in  $\text{CDCl}_3$  at 600 MHz; (G) HMBC spectrum in  $\text{CDCl}_3$  at 600 MHz; (H) NOESY spectrum in  $\text{CDCl}_3$  at 600 MHz.

A

Monoisotopic Mass, Even Electron Ions  
 270 formula(e) evaluated with 2 results within limits (up to 50 closest results for each mass)  
 Elements Used:  
 C: 0-500 H: 0-1000 O: 0-200 Na: 0-1  
 EC1B3-2-6  
 2018061119 234 (1.885)

1: TOF MS ES+  
 7.57e+004

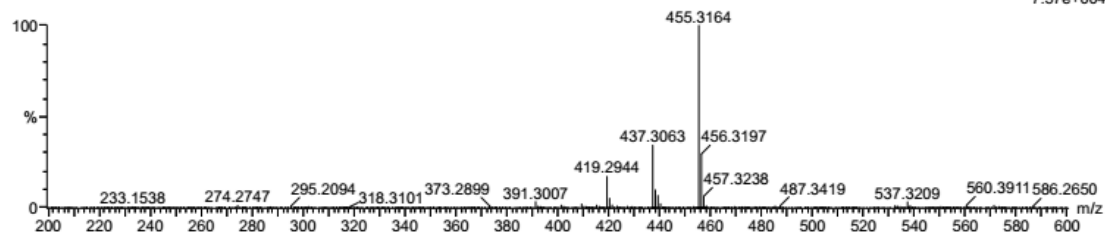

Minimum: -1.5  
 Maximum: 5.0 5.0 50.0

| Mass     | Calc. Mass | mDa  | PPM  | DBE  | i-FIT | Norm  | Conf (%) | Formula       |
|----------|------------|------|------|------|-------|-------|----------|---------------|
| 537.3209 | 537.3192   | 1.7  | 3.2  | 8.5  | 82.3  | 1.403 | 24.59    | C31 H46 O6 Na |
|          | 537.3216   | -0.7 | -1.3 | 11.5 | 81.1  | 0.282 | 75.41    | C33 H45 O6    |

B

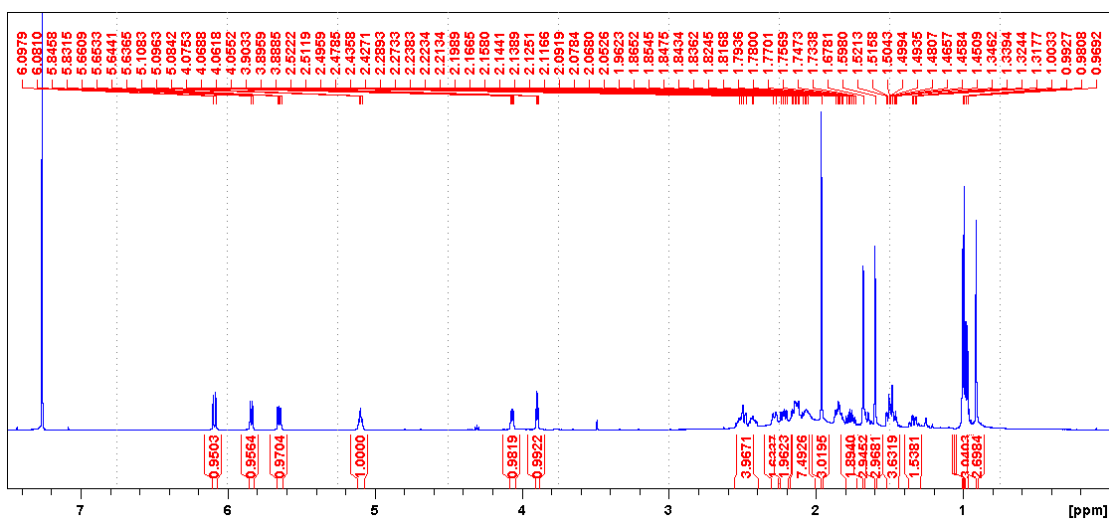

C

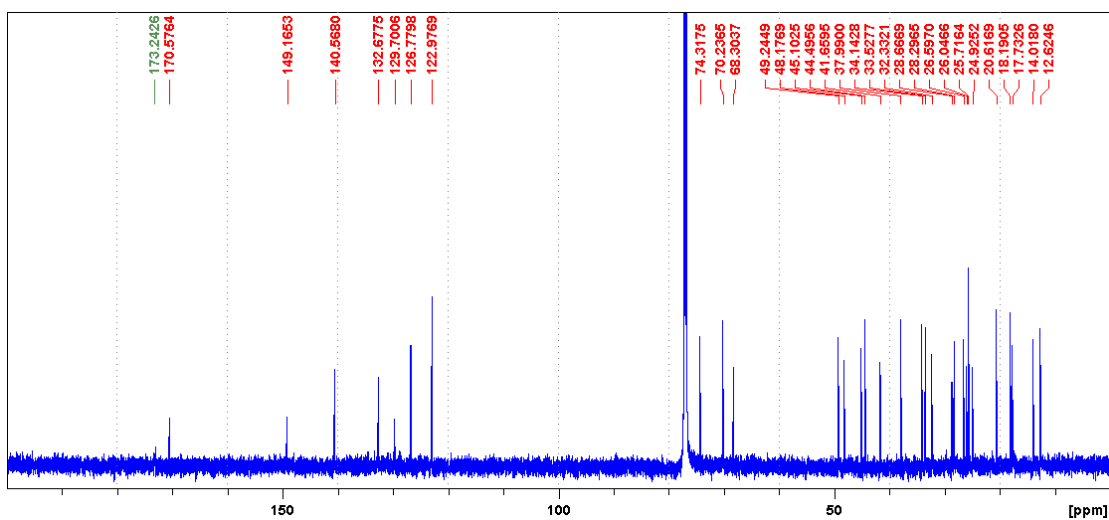

D

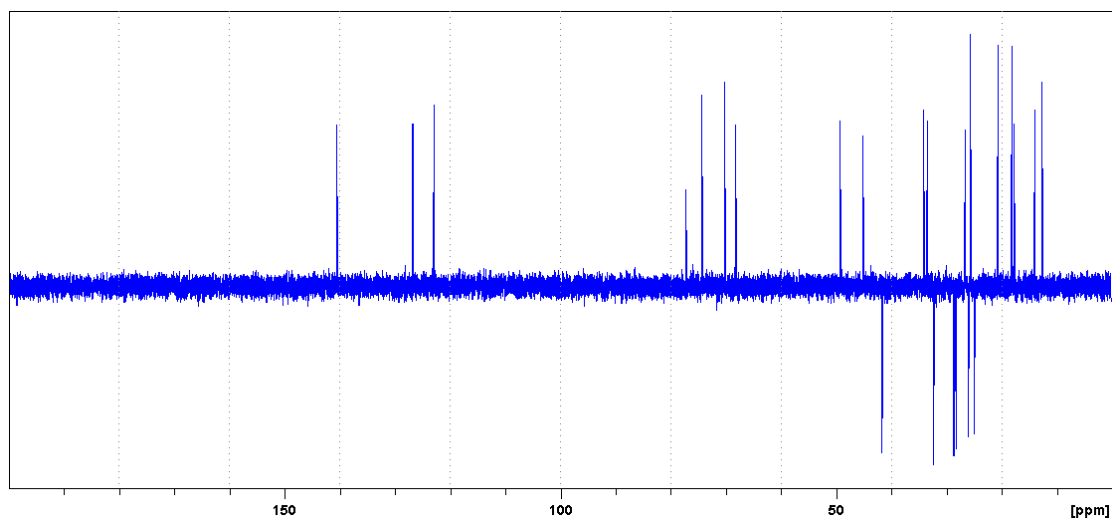

E

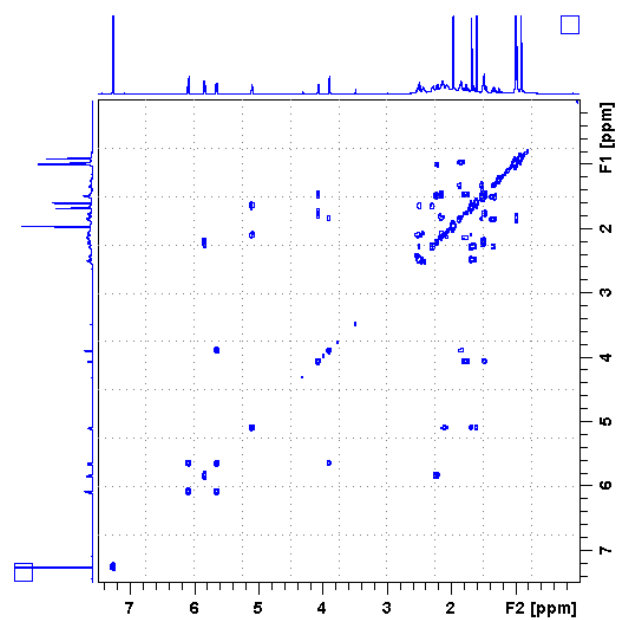

F

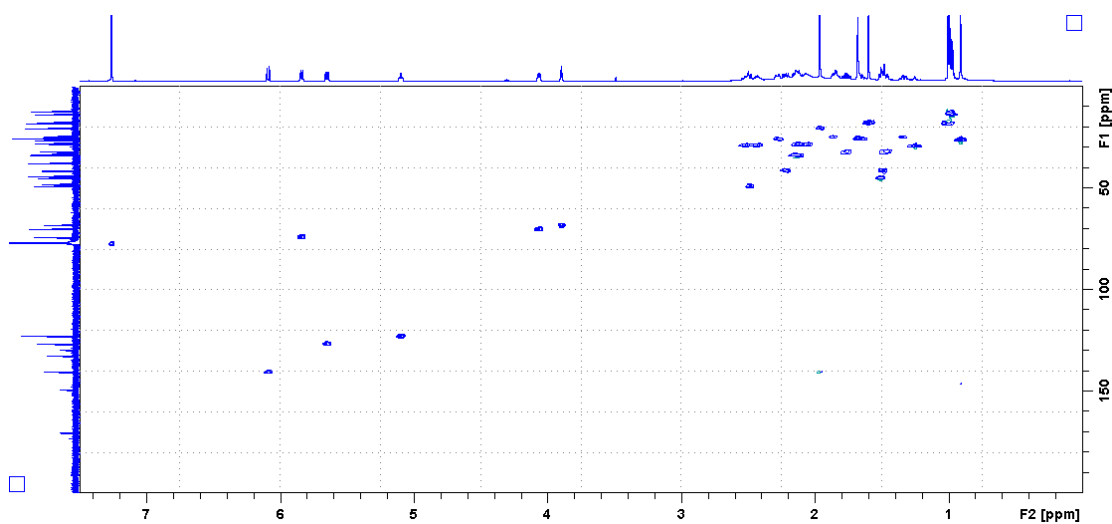

G

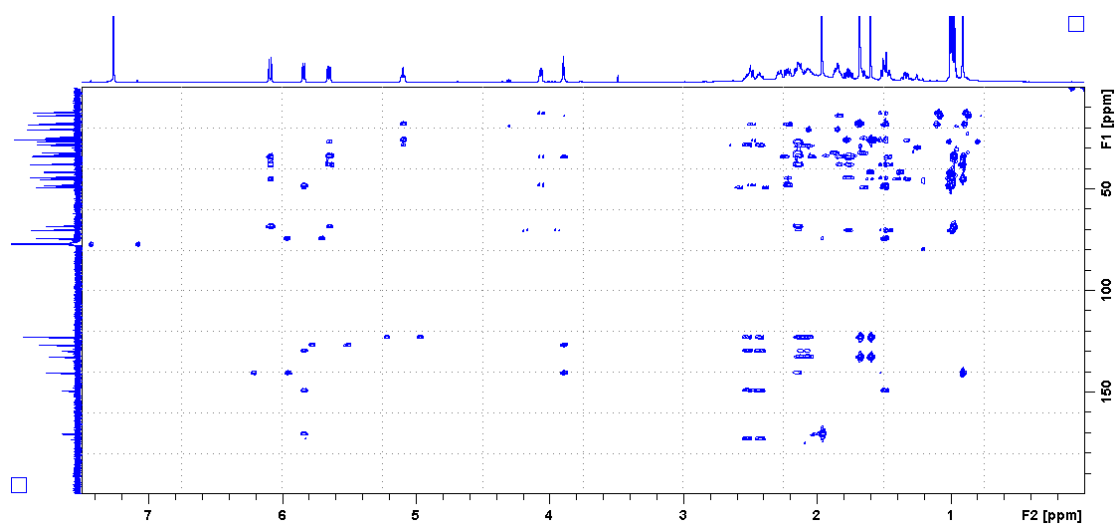

H

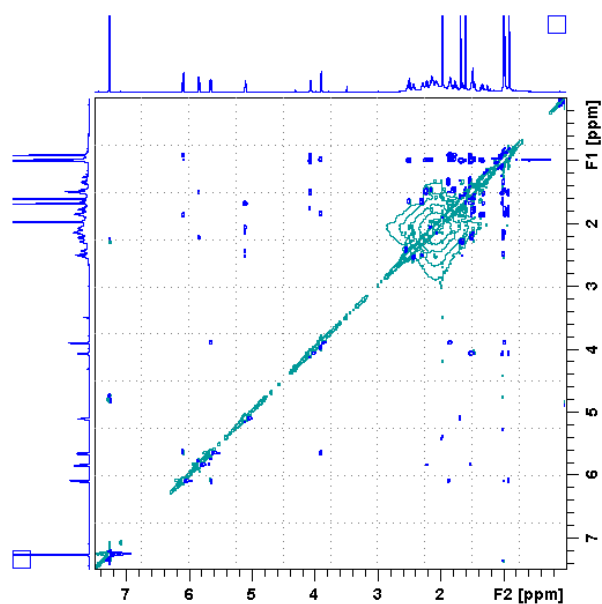

**Figure S25** HRESIMS and NMR spectra of **32**.

(A) HRESIMS spectrum; (B)  $^1\text{H}$  NMR spectrum in  $\text{CDCl}_3$  at 600 MHz; (C)  $^{13}\text{C}$  NMR spectrum in  $\text{CDCl}_3$  at 150 MHz; (D) DEPT 135 spectrum in  $\text{CDCl}_3$  at 150 MHz; (E)  $^1\text{H}$ - $^1\text{H}$  COSY spectrum in  $\text{CDCl}_3$  at 600 MHz; (F) HSQC spectrum in  $\text{CDCl}_3$  at 600 MHz; (G) HMBC spectrum in  $\text{CDCl}_3$  at 600 MHz; (H) NOESY spectrum in  $\text{CDCl}_3$  at 600 MHz.

A

Monoisotopic Mass, Even Electron Ions  
 266 formula(e) evaluated with 2 results within limits (up to 50 closest results for each mass)  
 Elements Used:

C: 0-500 H: 0-1000 O: 0-200 Na: 0-1

30

20190107\_34 234 (1.885)

1: TOF MS ES+  
 1.46e+005

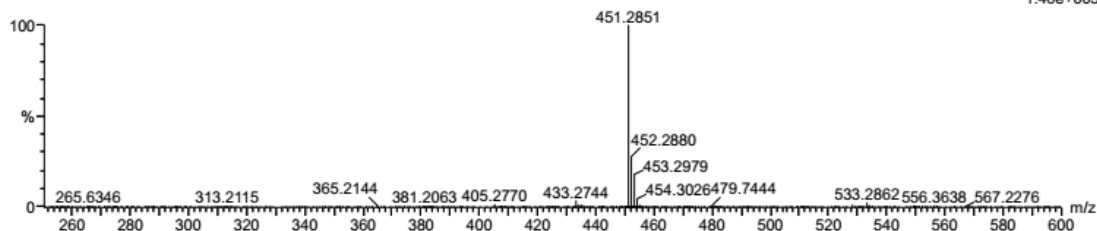

Minimum:

Maximum: 5.0 5.0 -1.5

| Mass     | Calc. Mass | mDa  | PPM  | DBE  | i-FIT | Norm  | Conf(%) | Formula       |
|----------|------------|------|------|------|-------|-------|---------|---------------|
| 533.2862 | 533.2879   | -1.7 | -3.2 | 10.5 | 65.8  | 0.227 | 79.72   | C31 H42 O6 Na |
|          | 533.2844   | 1.8  | 3.4  | 22.5 | 67.1  | 1.595 | 20.28   | C40 H37 O     |

B

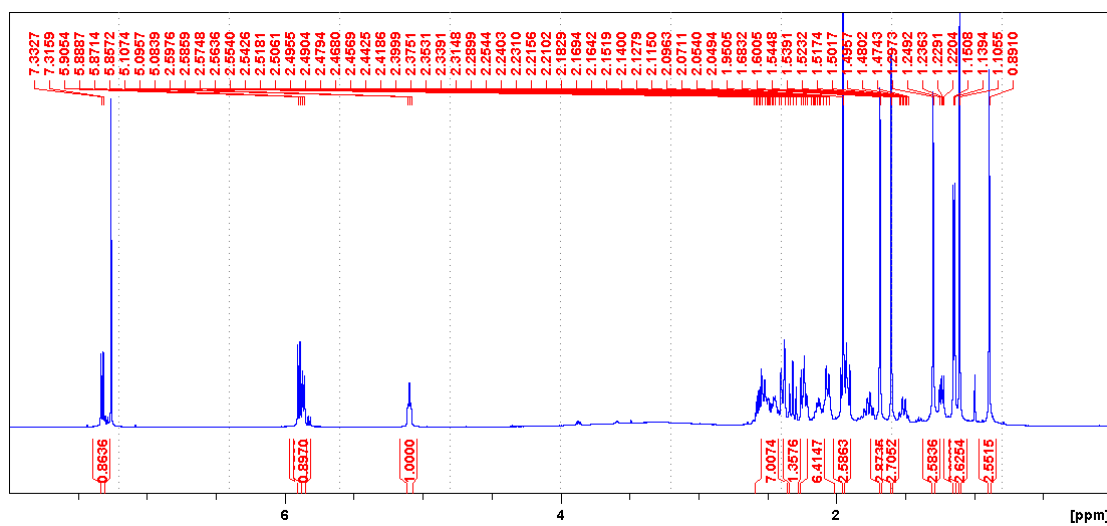

C

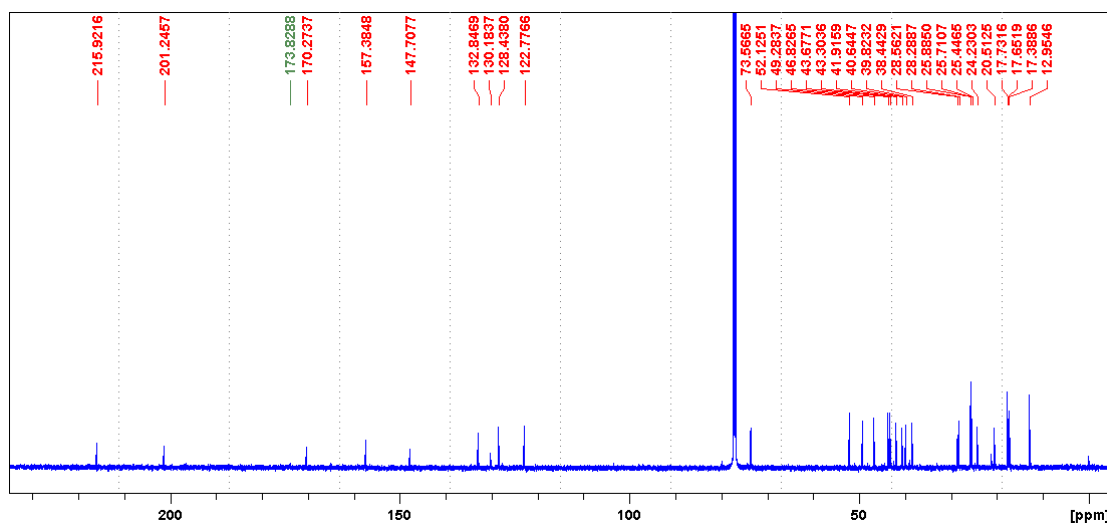

D

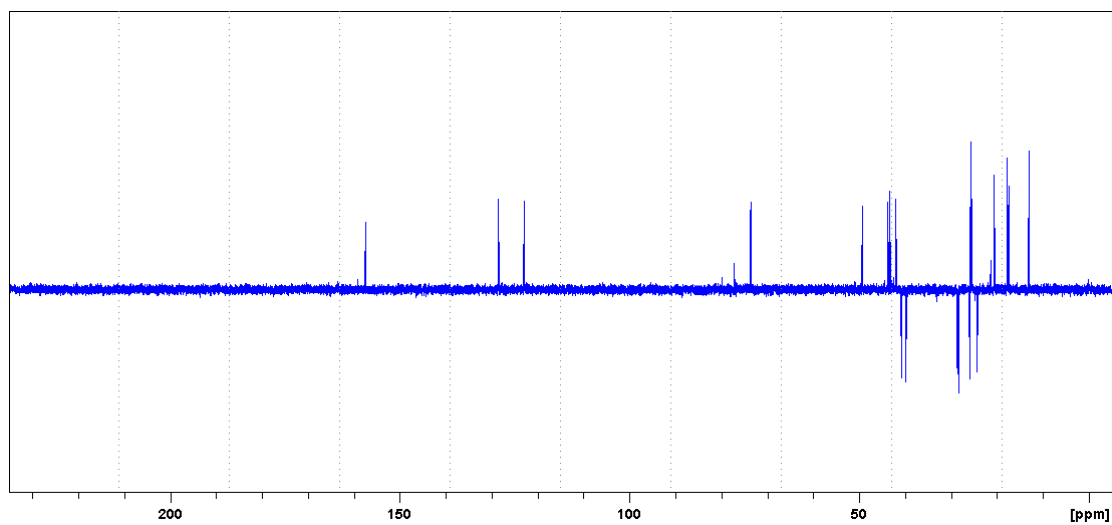

E

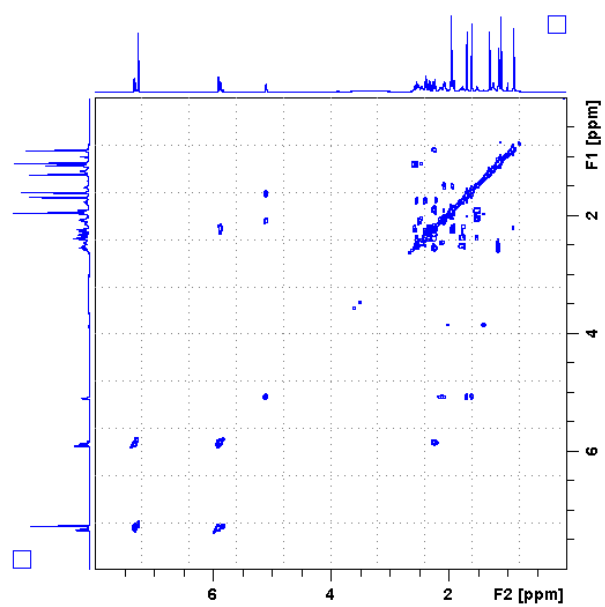

F

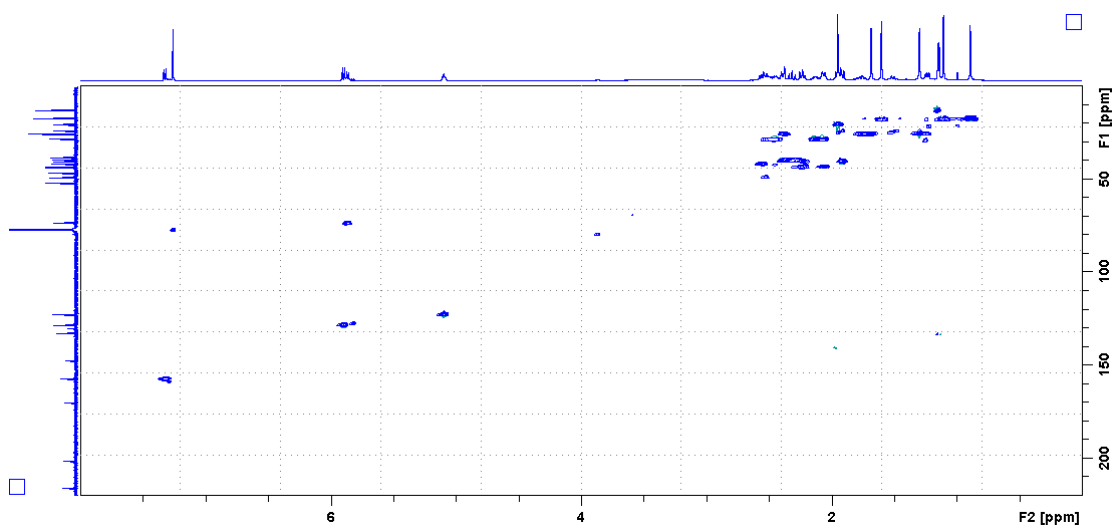



G

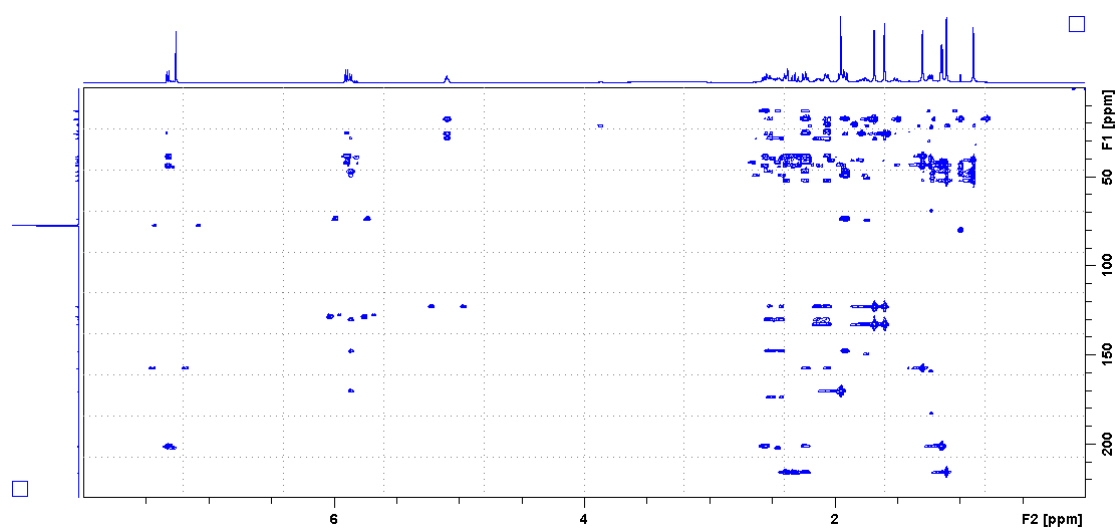

H

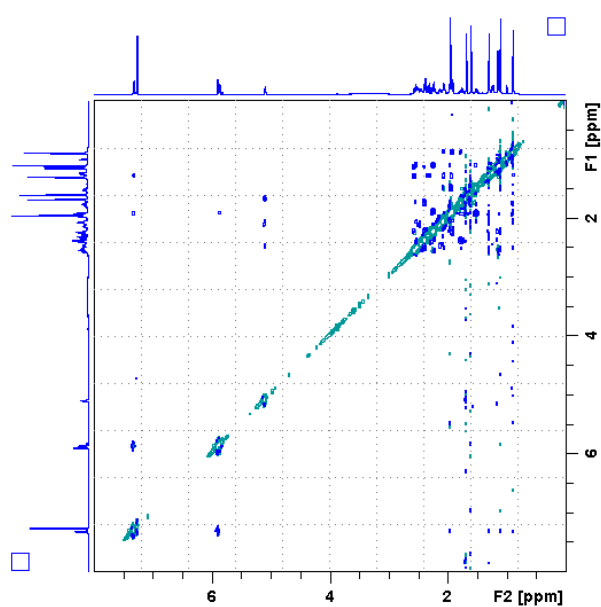

**Figure S26** HRESIMS and NMR spectra of **33**.

(A) HRESIMS spectrum; (B)  $^1\text{H}$  NMR spectrum in  $\text{CDCl}_3$  at 600 MHz; (C)  $^{13}\text{C}$  NMR spectrum in  $\text{CDCl}_3$  at 150 MHz; (D) DEPT 135 spectrum in  $\text{CDCl}_3$  at 150 MHz; (E)  $^1\text{H}$ - $^1\text{H}$  COSY spectrum in  $\text{CDCl}_3$  at 600 MHz; (F) HSQC spectrum in  $\text{CDCl}_3$  at 600 MHz; (G) HMBC spectrum in  $\text{CDCl}_3$  at 600 MHz; (H) NOESY spectrum in  $\text{CDCl}_3$  at 600 MHz.

A

Monoisotopic Mass, Even Electron Ions  
 279 formula(e) evaluated with 2 results within limits (up to 50 closest results for each mass)  
 Elements Used:  
 C: 0-500 H: 0-1000 O: 0-200 Na: 0-1  
 EC1B3-2-4  
 2018061117 236 (1.900)

1: TOF MS ES+  
 5.39e+004

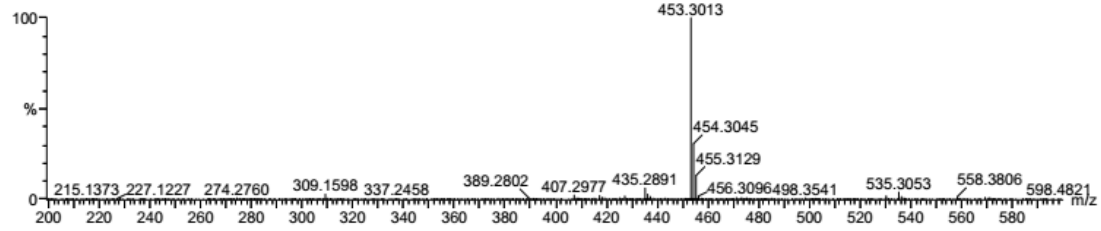

Minimum: -1.5  
 Maximum: 5.0 5.0 50.0

| Mass     | Calc. Mass | mDa  | PPM  | DBE  | i-FIT | Norm  | Conf(%) | Formula       |
|----------|------------|------|------|------|-------|-------|---------|---------------|
| 535.3053 | 535.3036   | 1.7  | 3.2  | 9.5  | 76.4  | 0.923 | 39.73   | C31 H44 O6 Na |
|          | 535.3060   | -0.7 | -1.3 | 12.5 | 75.9  | 0.506 | 60.27   | C33 H43 O6    |

B

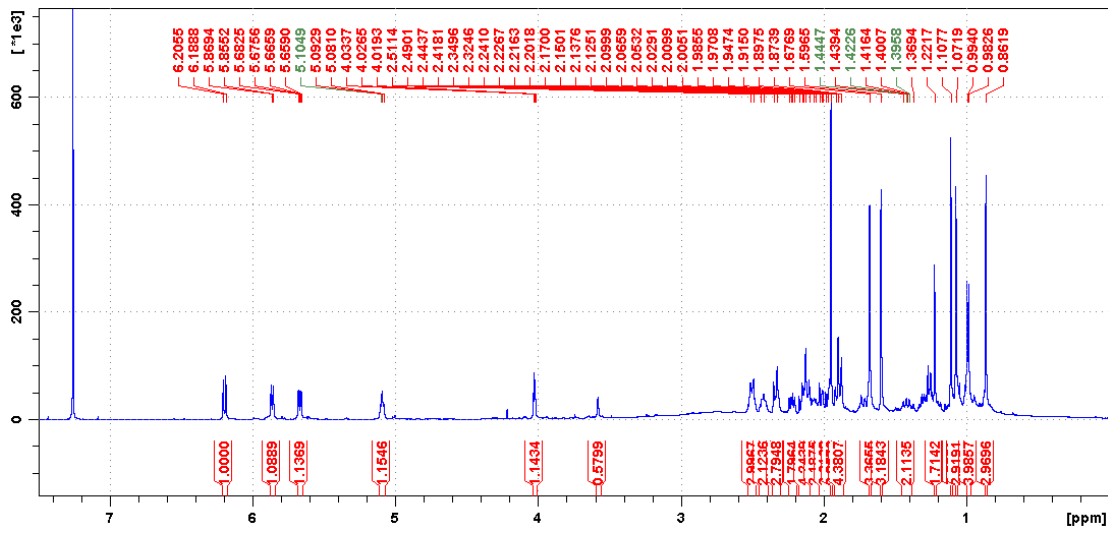

C

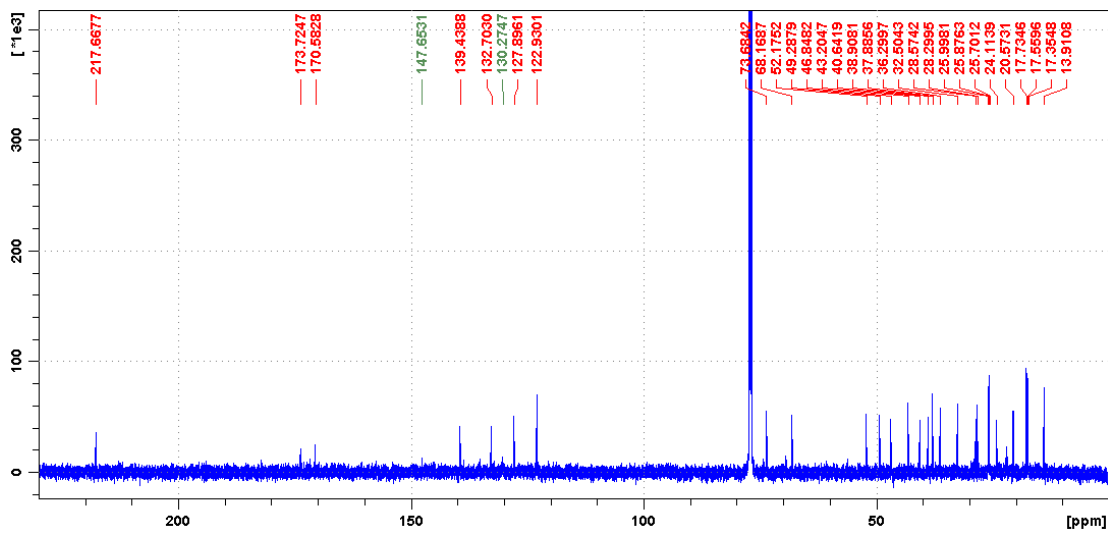

D

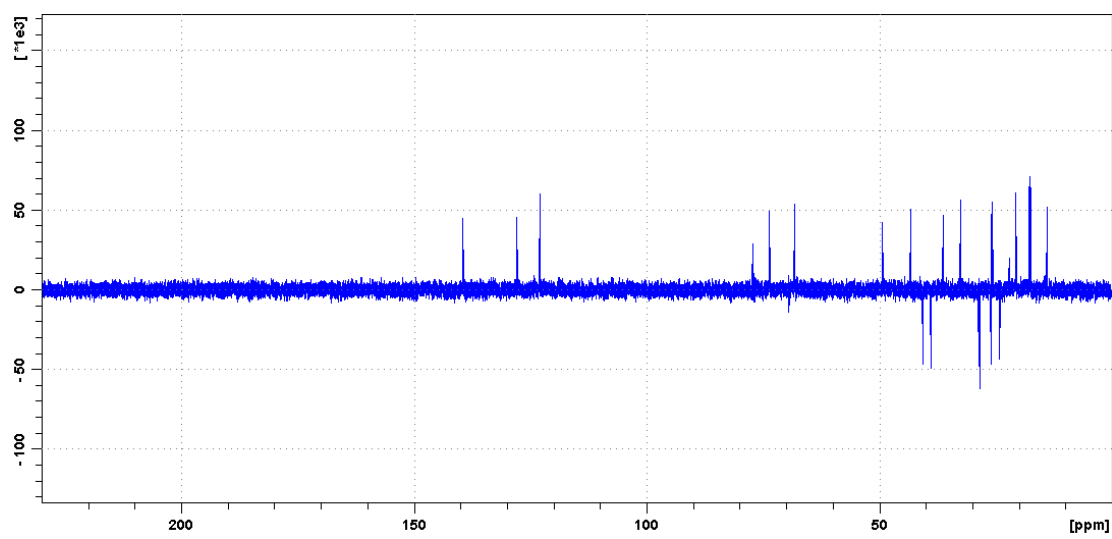

E

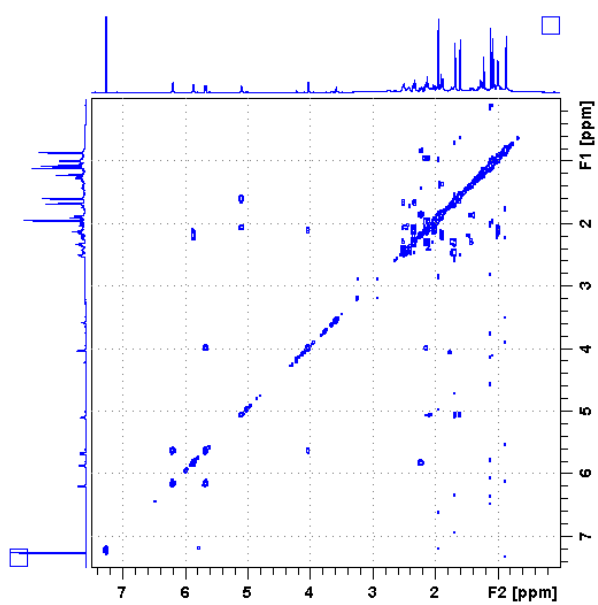

F

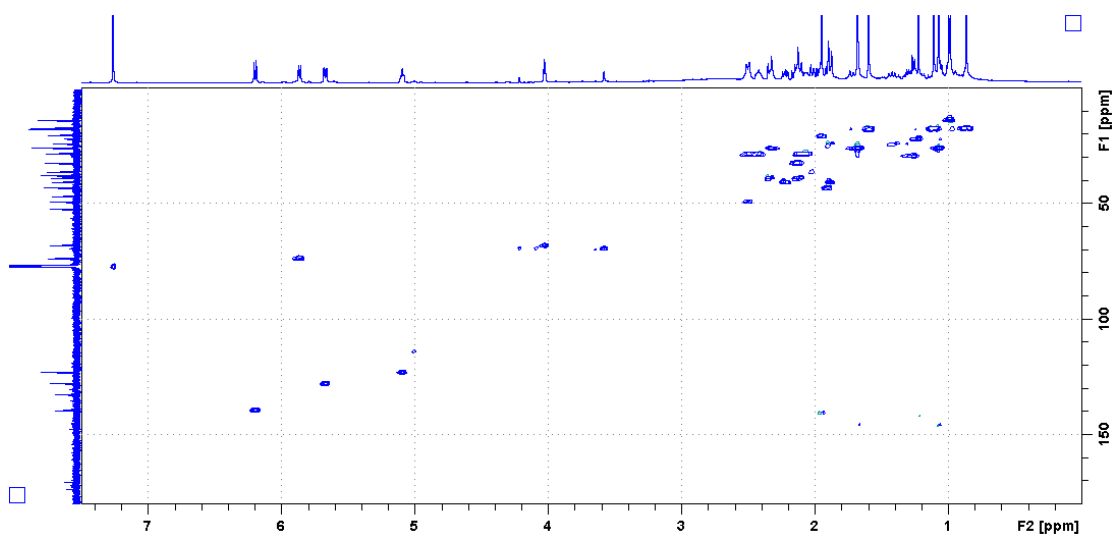

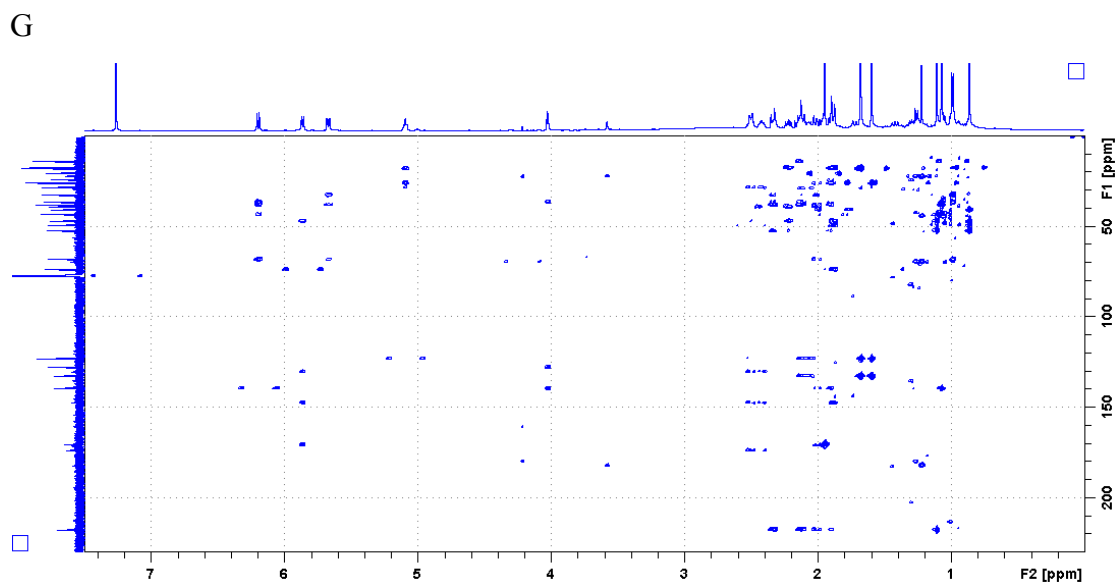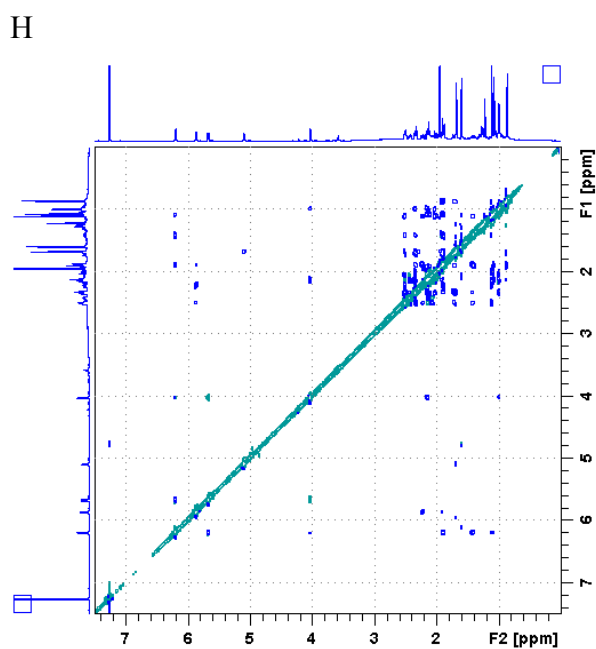

**Figure S27** HRESIMS and NMR spectra of **34**.

(A) HRESIMS spectrum; (B)  $^1\text{H}$  NMR spectrum in  $\text{CDCl}_3$  at 600 MHz; (C)  $^{13}\text{C}$  NMR spectrum in  $\text{CDCl}_3$  at 150 MHz; (D) DEPT 135 spectrum in  $\text{CDCl}_3$  at 150 MHz; (E)  $^1\text{H}$ - $^1\text{H}$  COSY spectrum in  $\text{CDCl}_3$  at 600 MHz; (F) HSQC spectrum in  $\text{CDCl}_3$  at 600 MHz; (G) HMBC spectrum in  $\text{CDCl}_3$  at 600 MHz; (H) ROESY spectrum in  $\text{CDCl}_3$  at 600 MHz.

A

Monoisotopic Mass, Even Electron Ions  
 277 formula(e) evaluated with 2 results within limits (up to 50 closest results for each mass)  
 Elements Used:  
 C: 0-500 H: 0-1000 O: 0-200 Na: 0-1  
 EB1-B4-70-1  
 20190527\_12 193 (1.556)

1: TOF MS ES+  
 3.01e+005

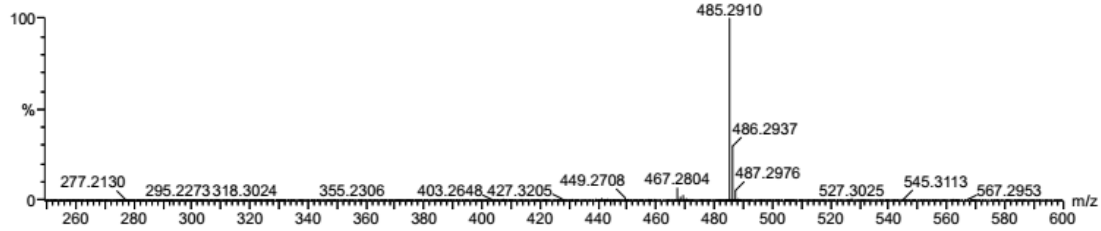

| Mass     | Calc. Mass | mDa  | PPM  | DBE | i-FIT | Norm  | Conf (%) | Formula       |
|----------|------------|------|------|-----|-------|-------|----------|---------------|
| 545.3113 | 545.3114   | -0.1 | -0.2 | 9.5 | 115.2 | 0.240 | 78.63    | C31 H45 O8    |
|          | 545.3090   | 2.3  | 4.2  | 6.5 | 116.5 | 1.543 | 21.37    | C29 H46 O8 Na |

B

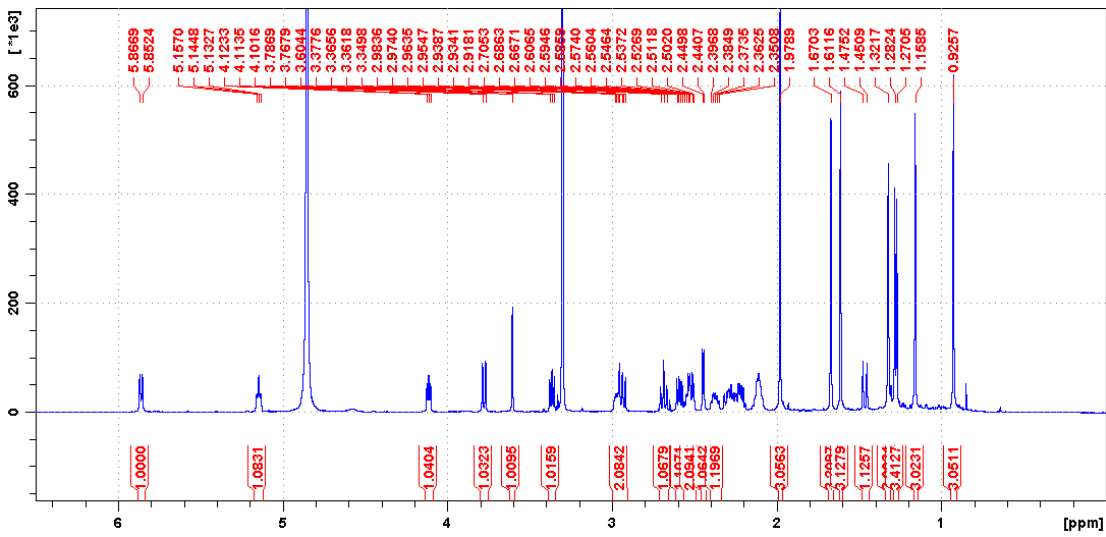

C

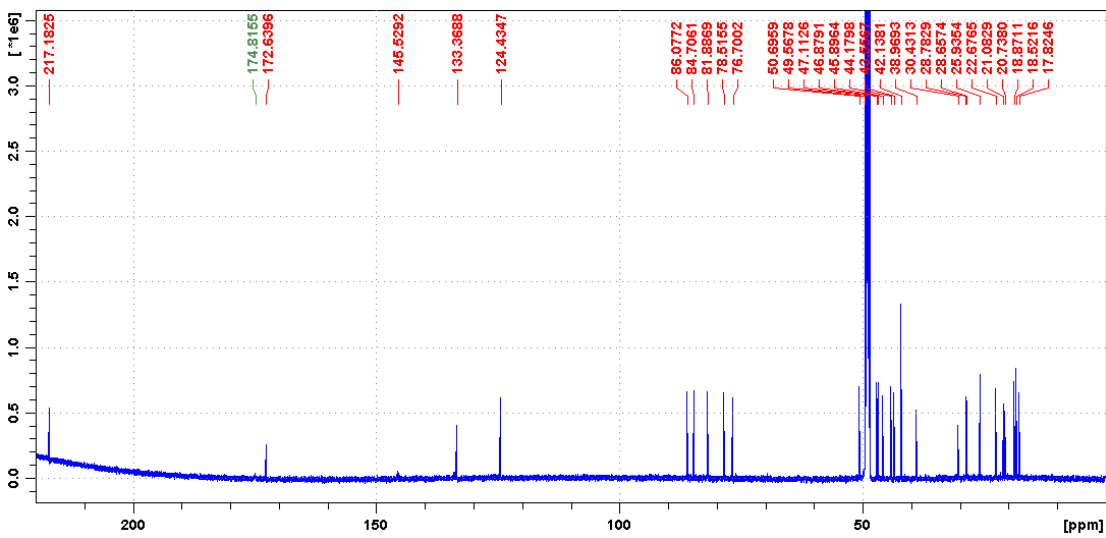

D

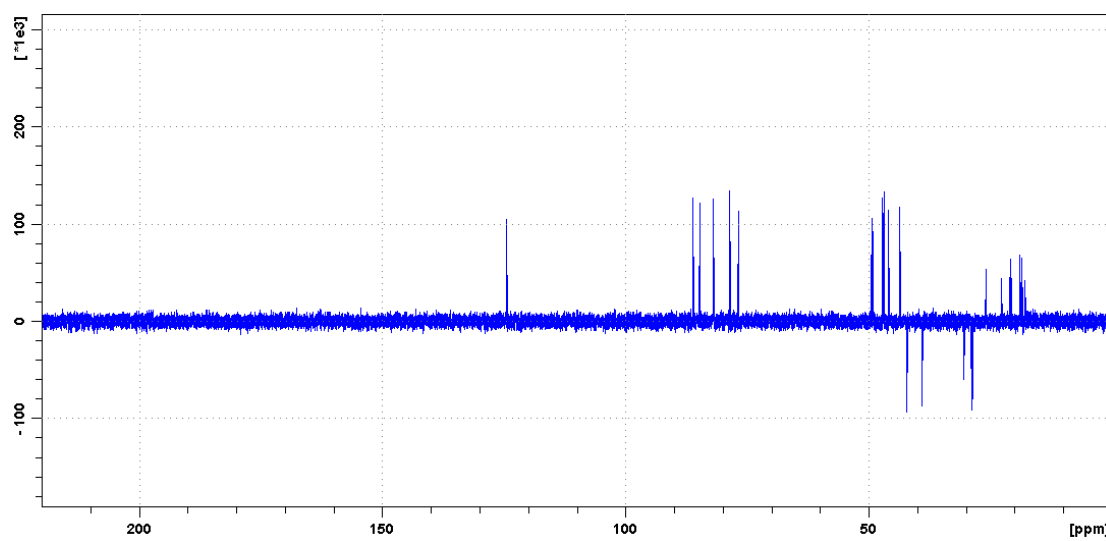

E

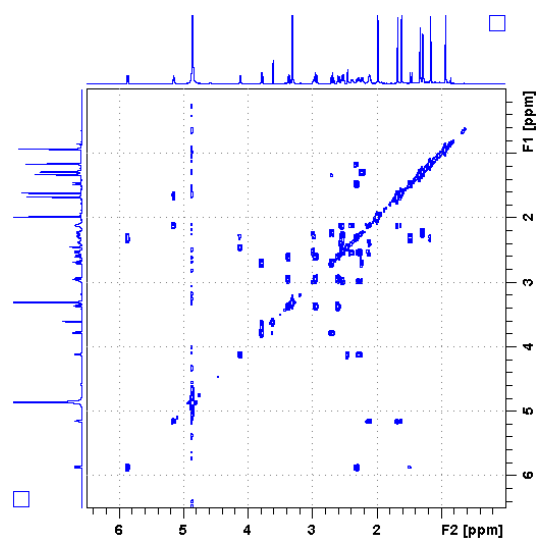

F

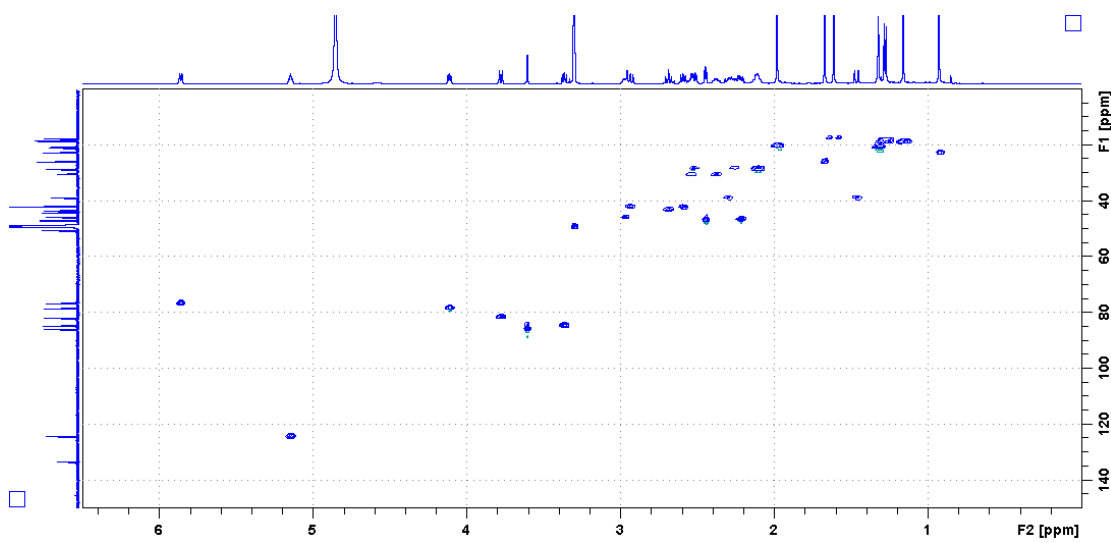

G

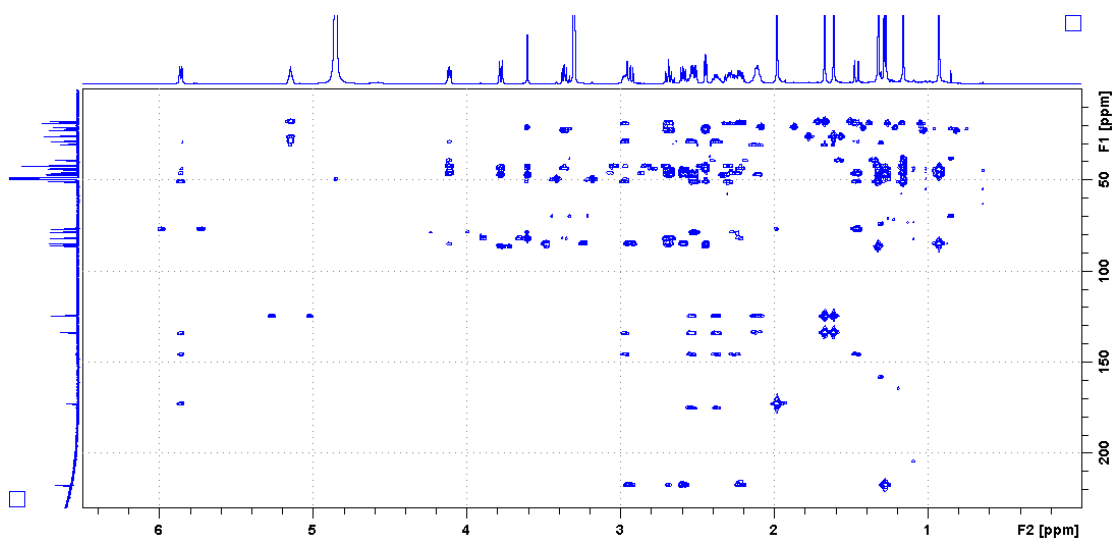

H

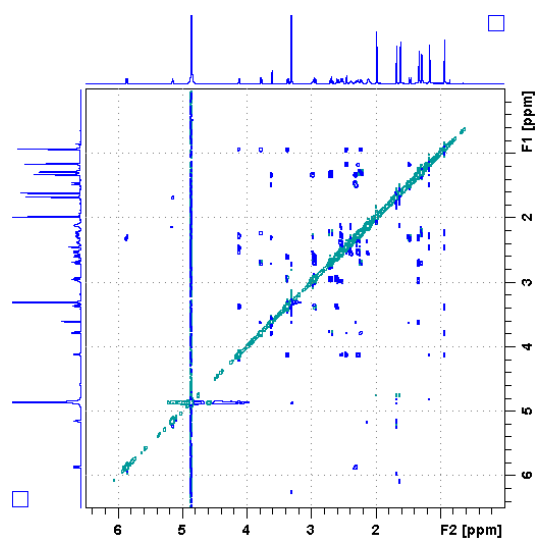

**Figure S28** HRESIMS and NMR spectra of **35**.

(A) HRESIMS spectrum; (B)  $^1\text{H}$  NMR spectrum in  $\text{CD}_3\text{OD}$  at 600 MHz; (C)  $^{13}\text{C}$  NMR spectrum in  $\text{CD}_3\text{OD}$  at 150 MHz; (D) DEPT 135 spectrum in  $\text{CD}_3\text{OD}$  at 150 MHz; (E)  $^1\text{H}$ - $^1\text{H}$  COSY spectrum in  $\text{CD}_3\text{OD}$  at 600 MHz; (F) HSQC spectrum in  $\text{CD}_3\text{OD}$  at 600 MHz; (G) HMBC spectrum in  $\text{CD}_3\text{OD}$  at 600 MHz; (H) ROESY spectrum in  $\text{CD}_3\text{OD}$  at 600 MHz.

A

Monoisotopic Mass, Even Electron Ions  
 140 formula(e) evaluated with 1 result within limits (up to 50 closest results for each mass)  
 Elements Used:  
 C: 0-500 H: 0-1000 O: 0-200  
 EB1-B4-60-5  
 20190527\_11 193 (1.556)

1: TOF MS ES+  
 1.53e+005

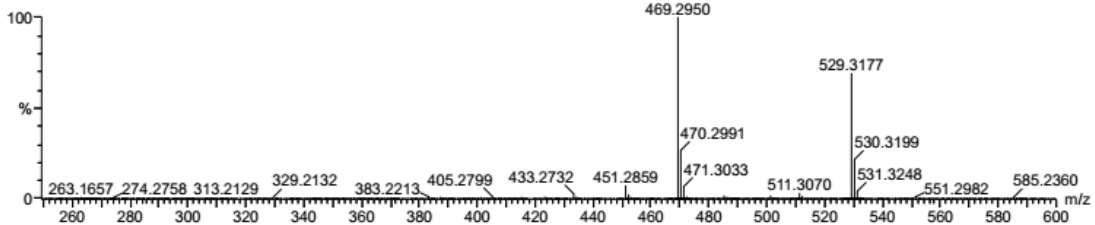

Minimum: -1.5  
 Maximum: 5.0 5.0 50.0

| Mass     | Calc. Mass | mDa | PPM | DBE | i-FIT | Norm | Conf (%) | Formula    |
|----------|------------|-----|-----|-----|-------|------|----------|------------|
| 529.3177 | 529.3165   | 1.2 | 2.3 | 9.5 | 327.2 | n/a  | n/a      | C31 H45 O7 |

B

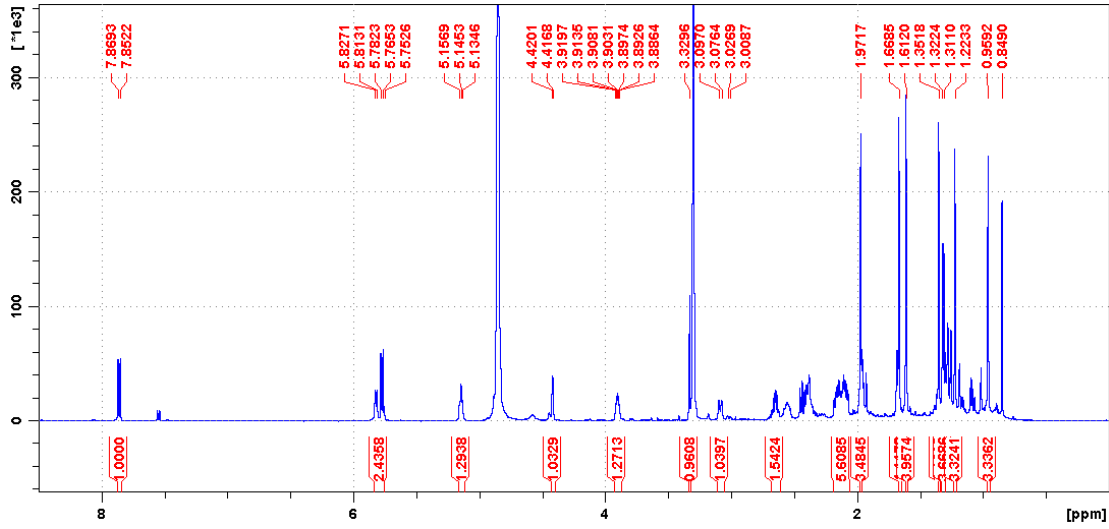

C

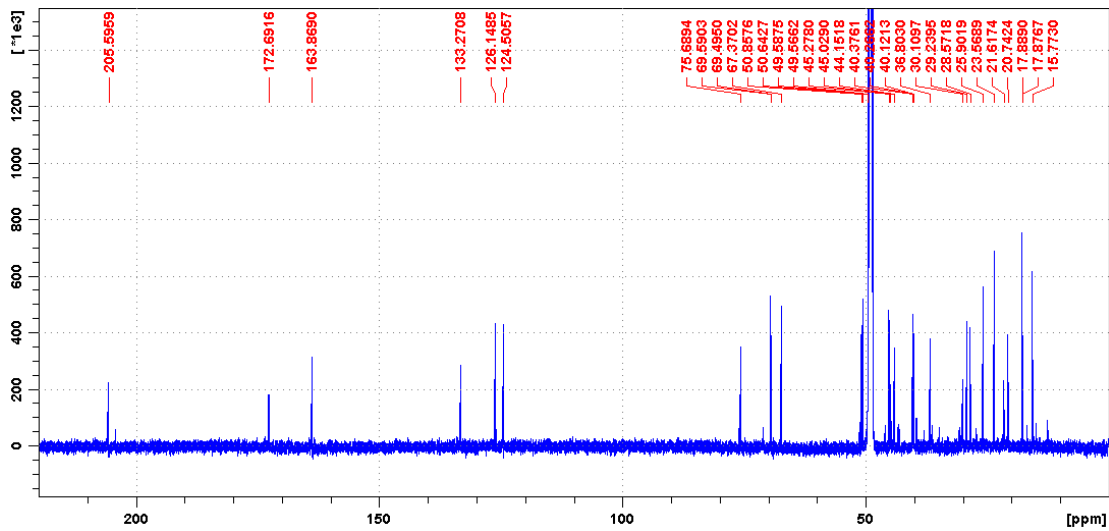



D

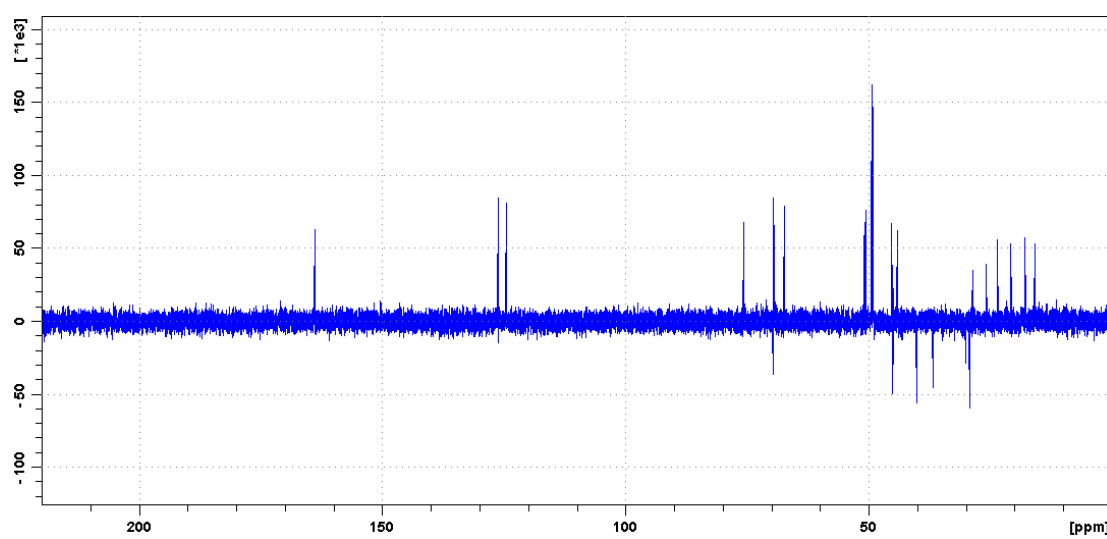

E

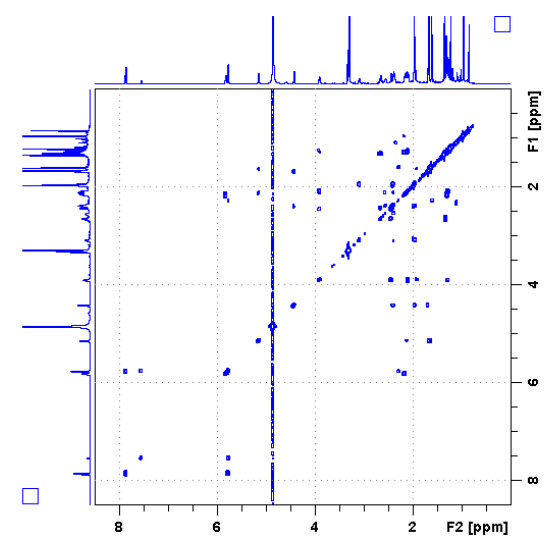

F

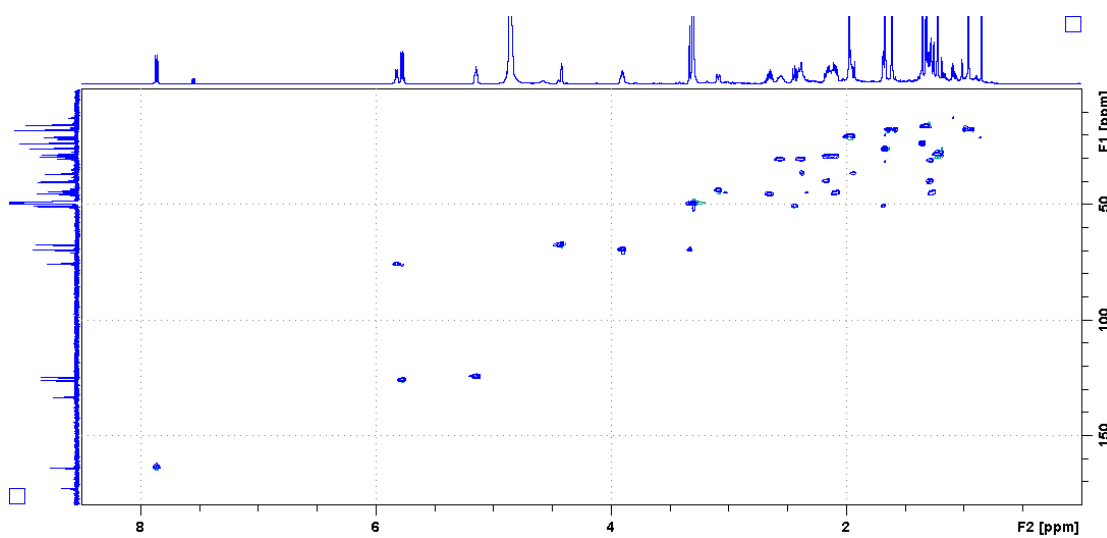

G

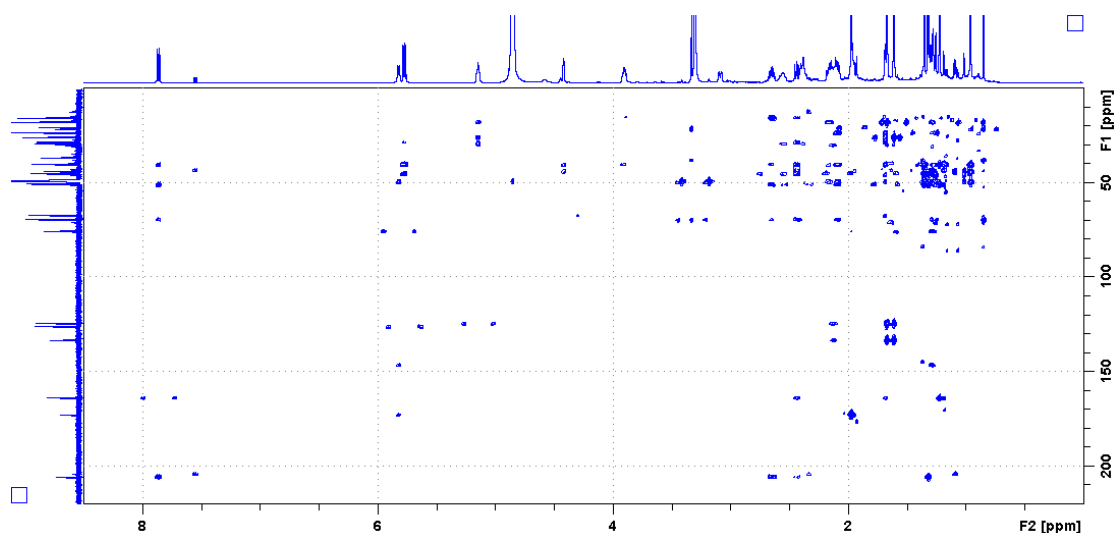

H

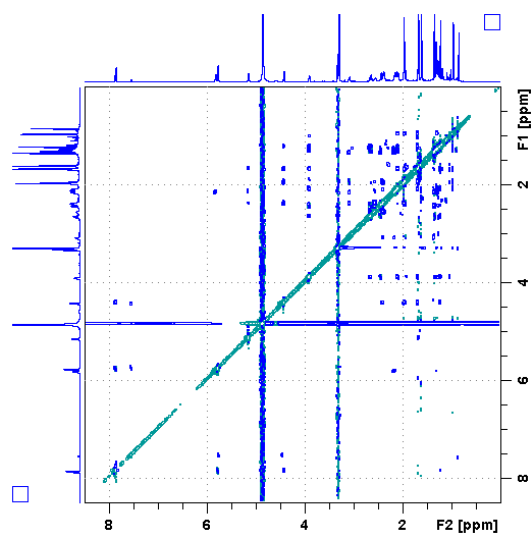

**Figure S29** HRESIMS and NMR spectra of **36**.

(A) HRESIMS spectrum; (B)  $^1\text{H}$  NMR spectrum in  $\text{CD}_3\text{OD}$  at 600 MHz; (C)  $^{13}\text{C}$  NMR spectrum in  $\text{CD}_3\text{OD}$  at 150 MHz; (D) DEPT 135 spectrum in  $\text{CD}_3\text{OD}$  at 150 MHz; (E)  $^1\text{H}$ - $^1\text{H}$  COSY spectrum in  $\text{CD}_3\text{OD}$  at 600 MHz; (F) HSQC spectrum in  $\text{CD}_3\text{OD}$  at 600 MHz; (G) HMBC spectrum in  $\text{CD}_3\text{OD}$  at 600 MHz; (H) ROESY spectrum in  $\text{CD}_3\text{OD}$  at 600 MHz.

A

Monoisotopic Mass, Even Electron Ions  
 263 formula(e) evaluated with 2 results within limits (up to 50 closest results for each mass)  
 Elements Used:  
 C: 0-500 H: 0-1000 O: 0-200 Na: 0-1  
 EB1C1-B3-80-4  
 20190923024 193 (1.556)

1: TOF MS ES+  
 3.55e+005

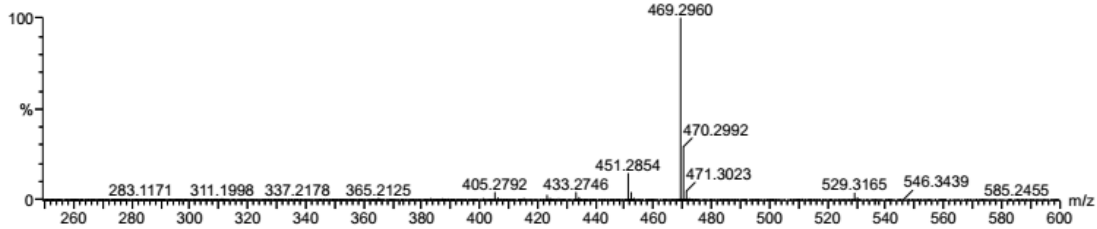

Minimum: -1.5  
 Maximum: 5.0 5.0 50.0

| Mass     | Calc. Mass | mDa | PPM | DBE | i-FIT | Norm  | Conf (%) | Formula       |
|----------|------------|-----|-----|-----|-------|-------|----------|---------------|
| 529.3165 | 529.3165   | 0.0 | 0.0 | 9.5 | 121.5 | 0.544 | 58.04    | C31 H45 O7    |
| 529.3141 | 529.3141   | 2.4 | 4.5 | 6.5 | 121.8 | 0.868 | 41.96    | C29 H46 O7 Na |

B

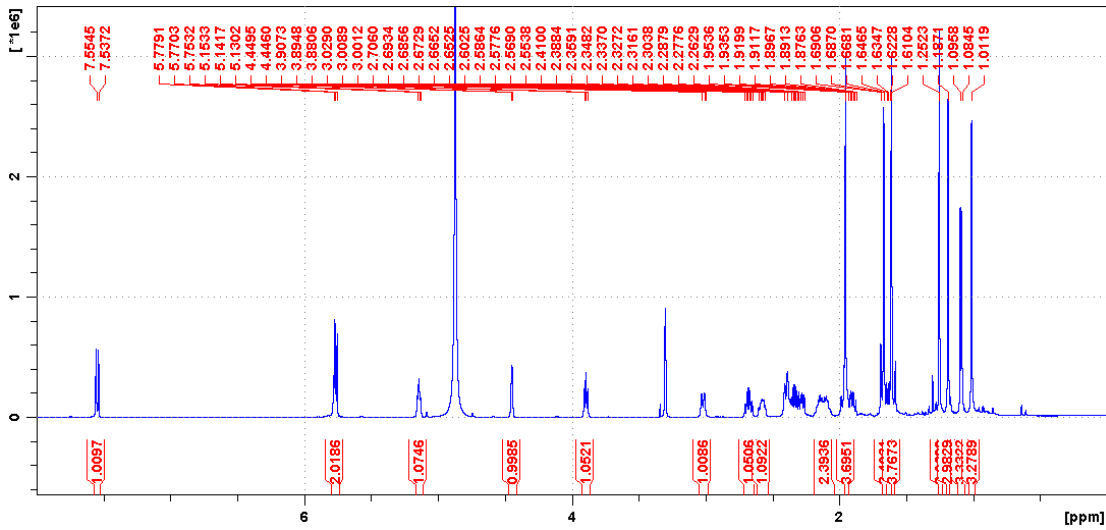

C

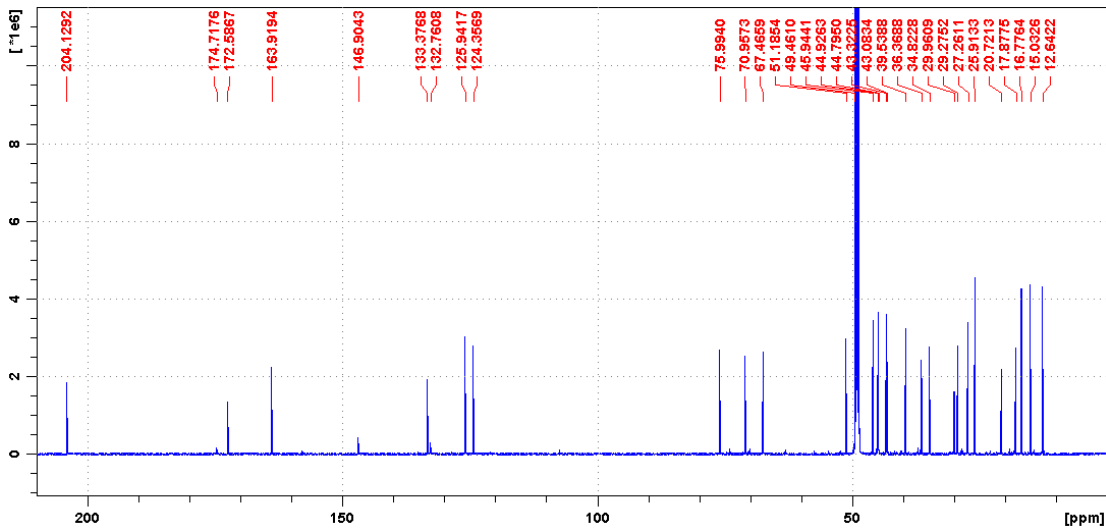

D

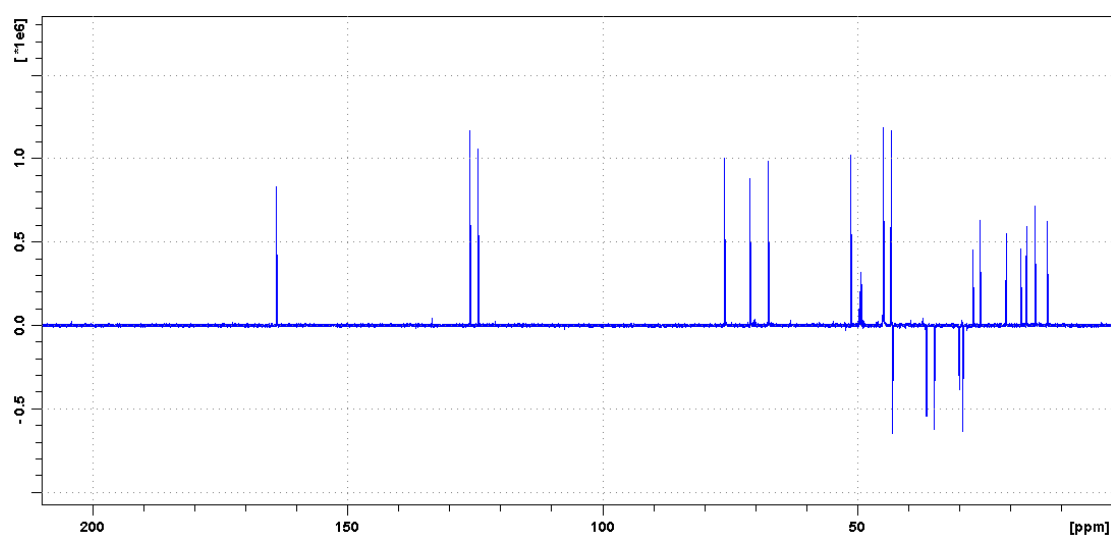

E

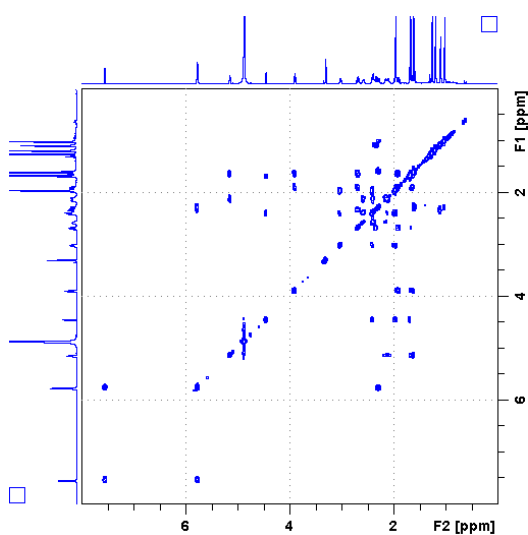

F

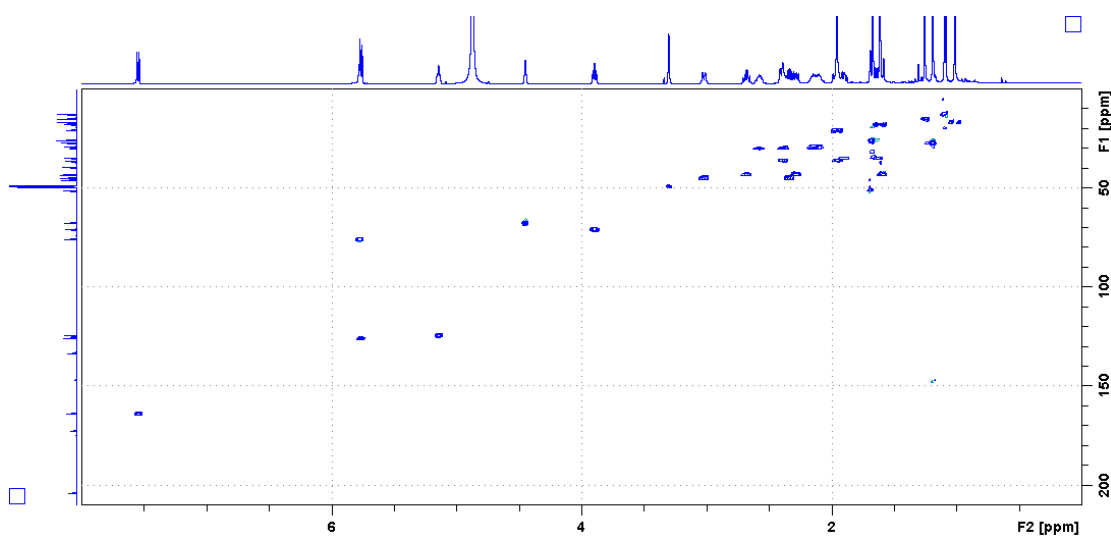

G

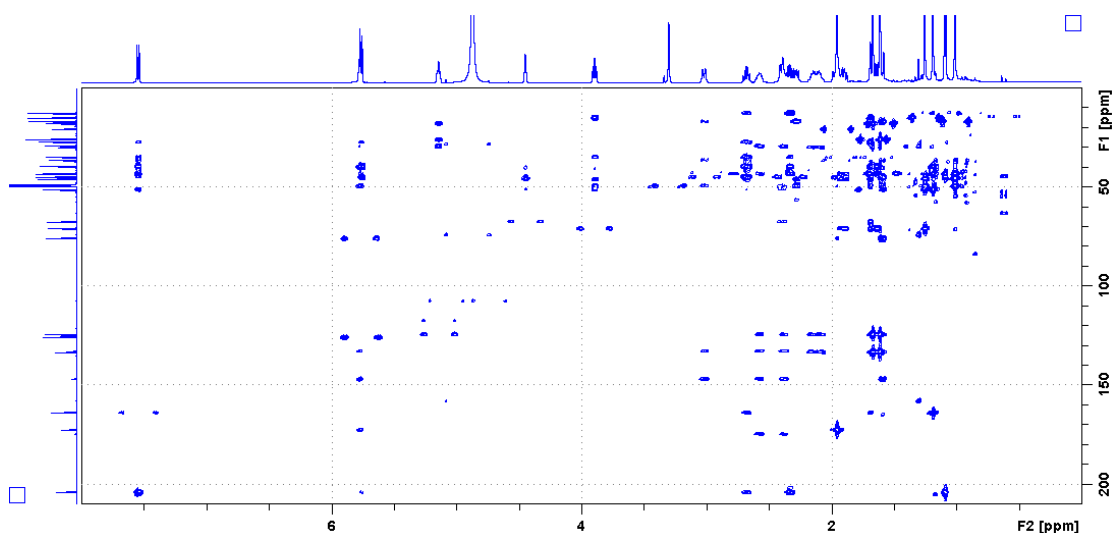

H

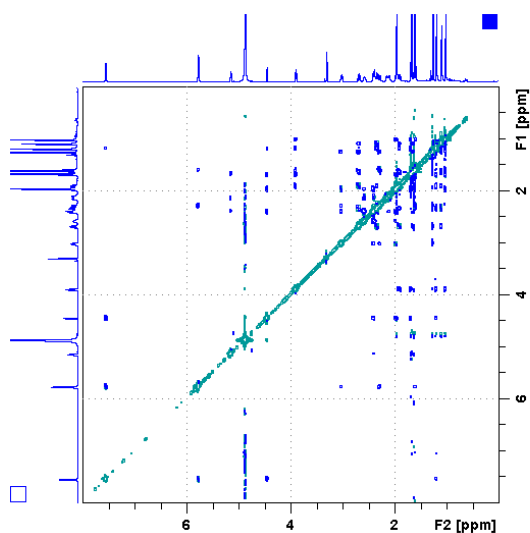

**Figure S30** HRESIMS and NMR spectra of **37**.

(A) HRESIMS spectrum; (B)  $^1\text{H}$  NMR spectrum in  $\text{CD}_3\text{OD}$  at 600 MHz; (C)  $^{13}\text{C}$  NMR spectrum in  $\text{CD}_3\text{OD}$  at 150 MHz; (D) DEPT 135 spectrum in  $\text{CD}_3\text{OD}$  at 150 MHz; (E)  $^1\text{H}$ - $^1\text{H}$  COSY spectrum in  $\text{CD}_3\text{OD}$  at 600 MHz; (F) HSQC spectrum in  $\text{CD}_3\text{OD}$  at 600 MHz; (G) HMBC spectrum in  $\text{CD}_3\text{OD}$  at 600 MHz; (H) ROESY spectrum in  $\text{CD}_3\text{OD}$  at 600 MHz.



D

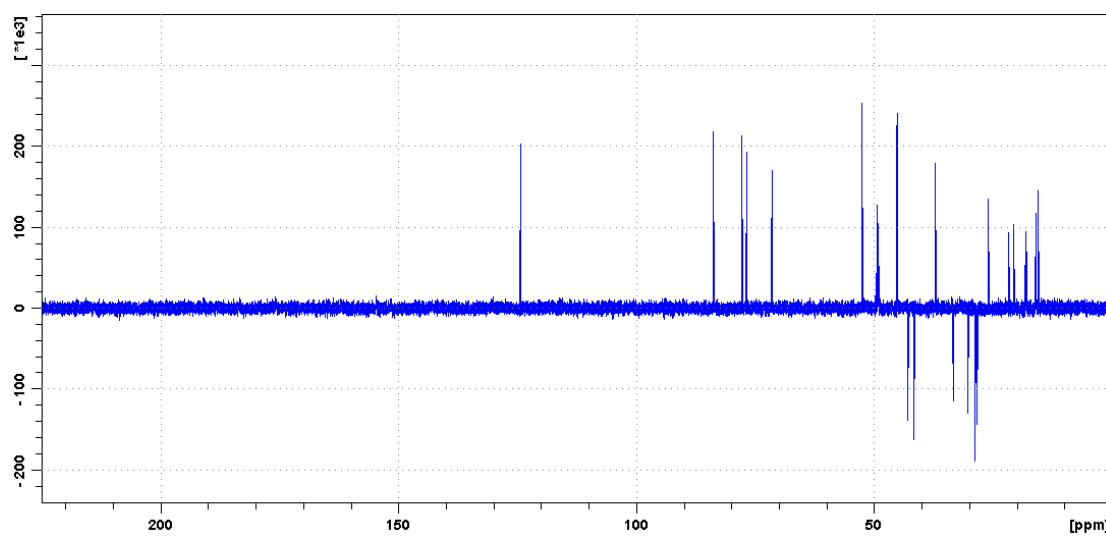

E

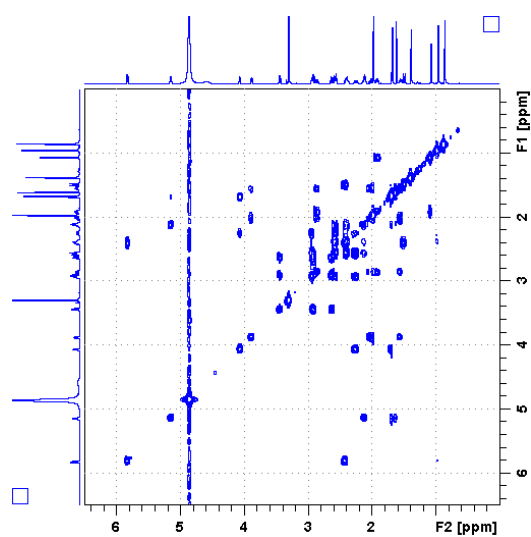

F

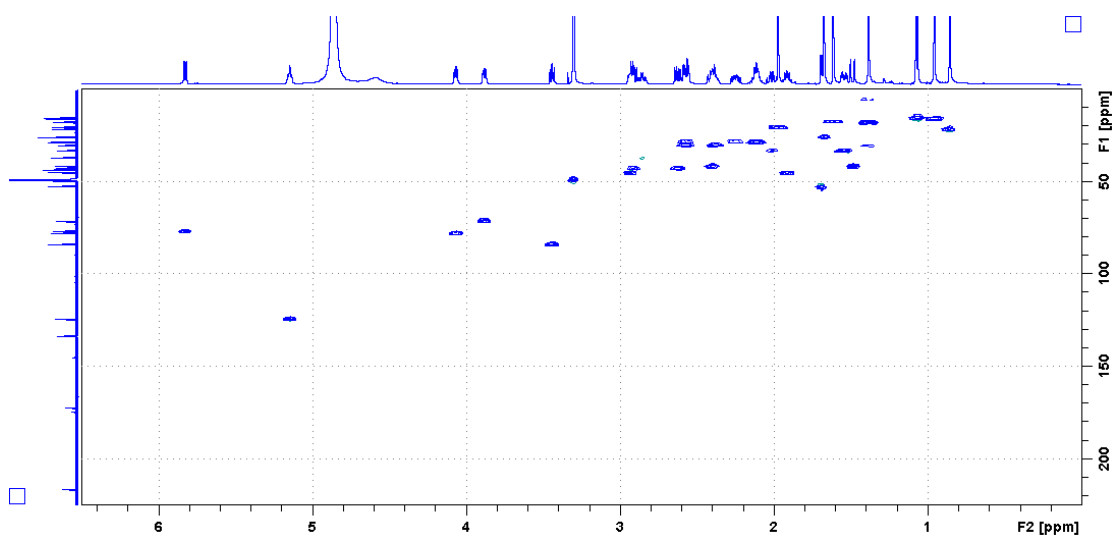

G

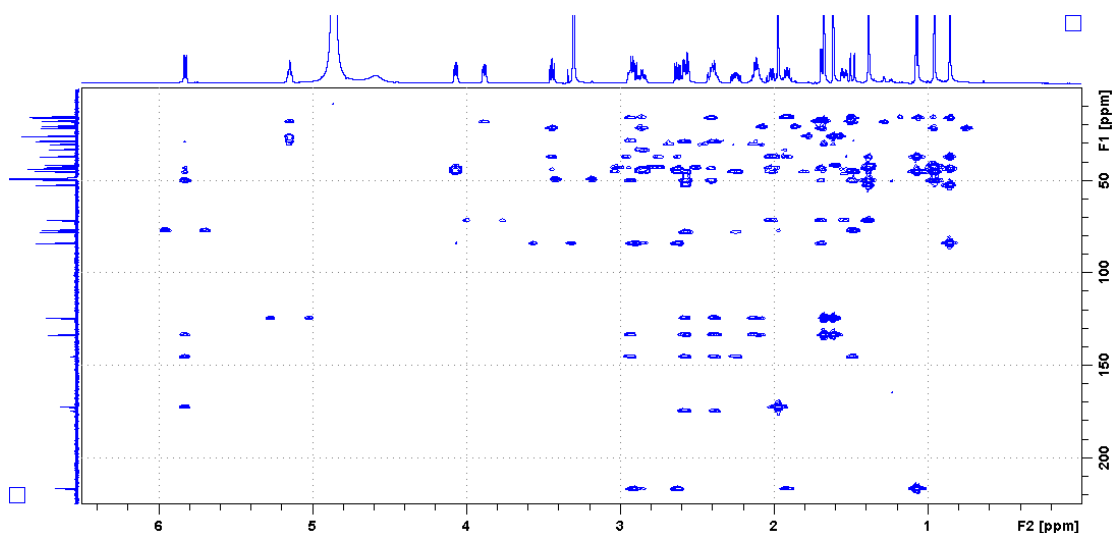

H

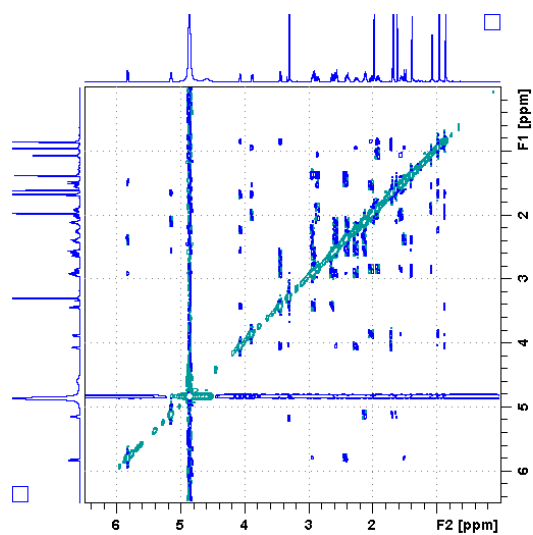

**Figure S31** HRESIMS and NMR spectra of **38**.

(A) HRESIMS spectrum; (B)  $^1\text{H}$  NMR spectrum in  $\text{CD}_3\text{OD}$  at 400 MHz; (C)  $^{13}\text{C}$  NMR spectrum in  $\text{CD}_3\text{OD}$  at 100 MHz; (D) DEPT 135 spectrum in  $\text{CD}_3\text{OD}$  at 100 MHz; (E)  $^1\text{H}$ - $^1\text{H}$  COSY spectrum in  $\text{CD}_3\text{OD}$  at 400 MHz; (F) HSQC spectrum in  $\text{CD}_3\text{OD}$  at 400 MHz; (G) HMBC spectrum in  $\text{CD}_3\text{OD}$  at 400 MHz; (H) ROESY spectrum in  $\text{CD}_3\text{OD}$  at 400 MHz.



A

Monoisotopic Mass, Even Electron Ions  
 117 formula(e) evaluated with 1 results within limits (up to 50 closest results for each mass)  
 Elements Used:  
 C: 0-500 H: 0-1000 O: 0-200  
 EB1-B4-70-6-1  
 20190527\_14 208 (1.683)

2: TOF MS ES+  
 2.14e+005

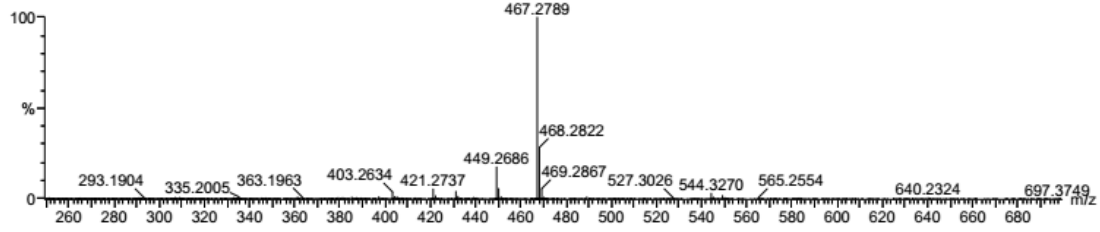

|          |          |          |     |      |      |      |     |      |            |
|----------|----------|----------|-----|------|------|------|-----|------|------------|
| Minimum: |          |          |     |      |      |      |     |      |            |
| Maximum: | 5.0      | 5.0      |     |      | -1.5 |      |     |      |            |
| Mass     | 467.2789 | 467.2797 | mDa | -0.8 | PPM  | -1.7 | DBE | 10.5 | i-FIT      |
|          |          |          |     |      |      |      |     |      | 384.5      |
|          |          |          |     |      |      |      |     |      | Norm       |
|          |          |          |     |      |      |      |     |      | n/a        |
|          |          |          |     |      |      |      |     |      | Conf (%)   |
|          |          |          |     |      |      |      |     |      | n/a        |
|          |          |          |     |      |      |      |     |      | Formula    |
|          |          |          |     |      |      |      |     |      | C29 H39 O5 |

B

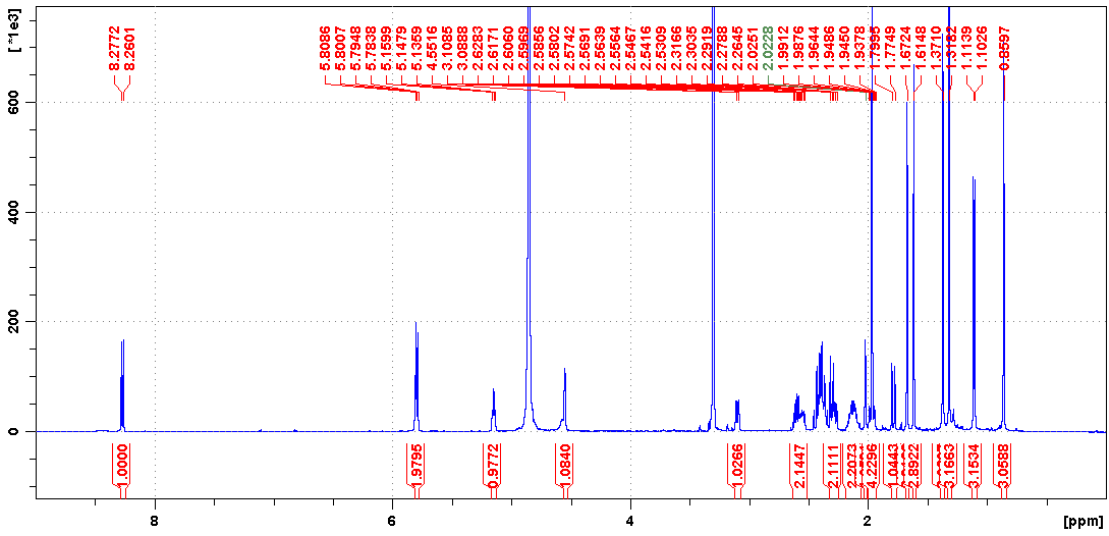

C

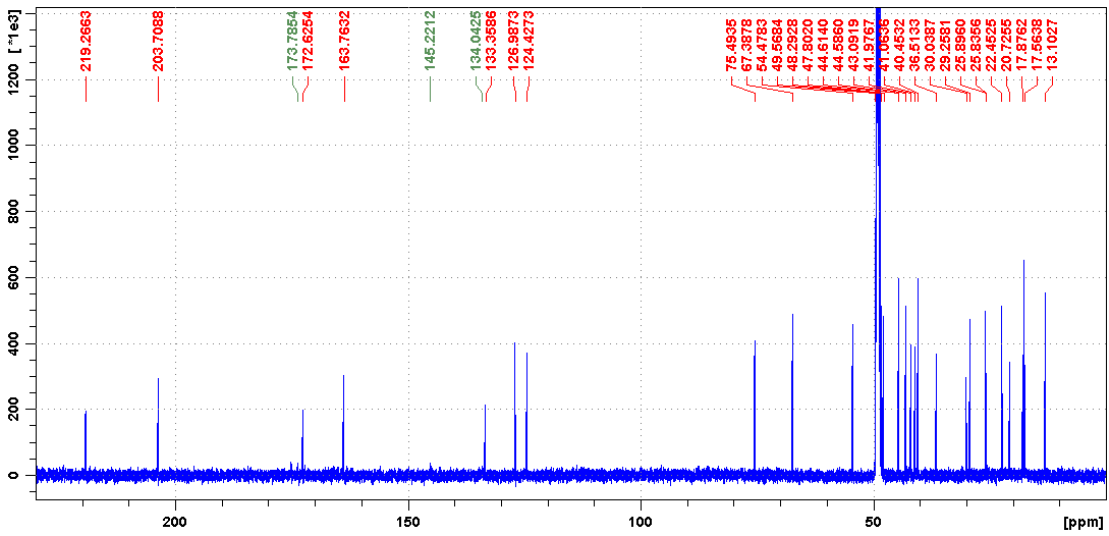

D

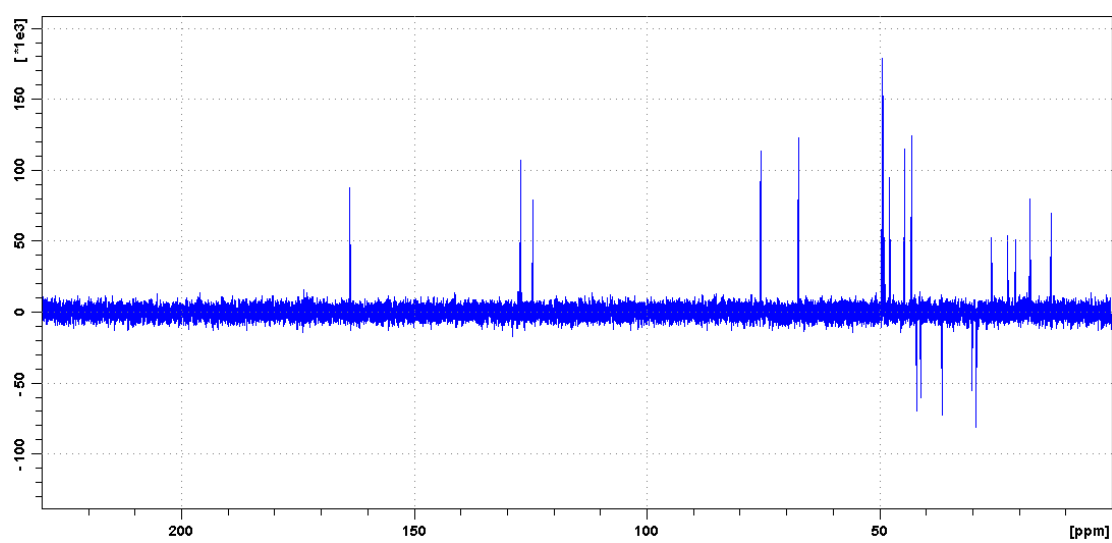

E

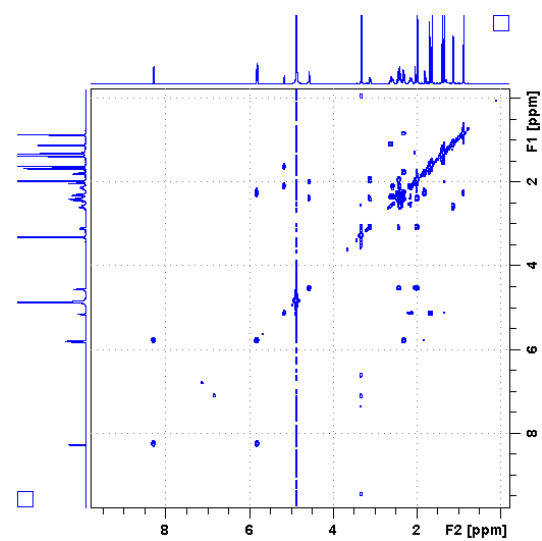

F

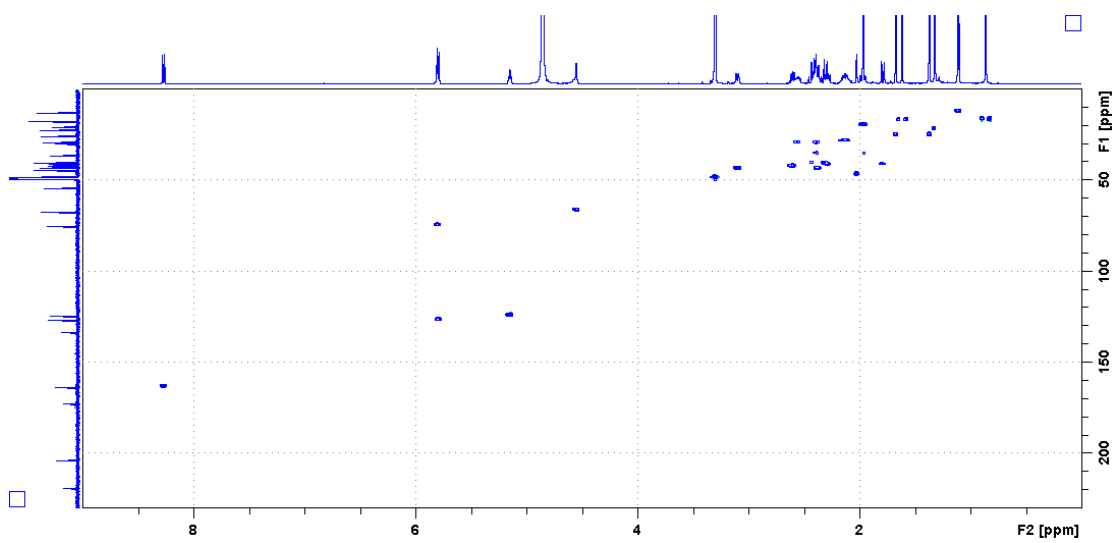

G

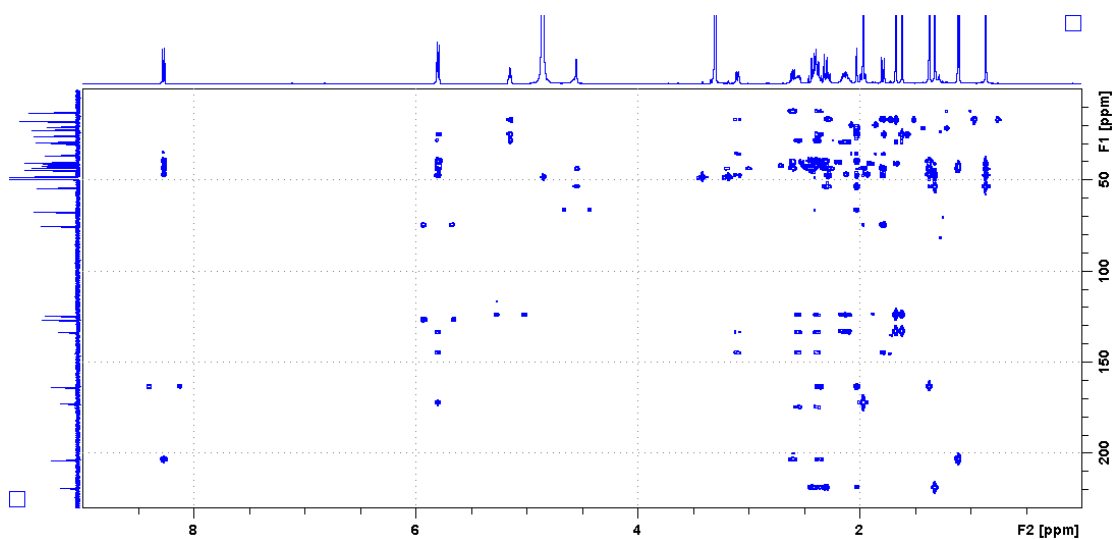

H

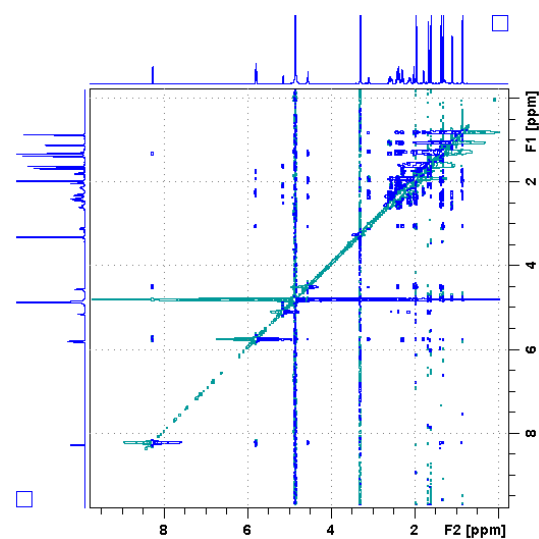

**Figure S32** HRESIMS and NMR spectra of **39**.

(A) HRESIMS spectrum; (B)  $^1\text{H}$  NMR spectrum in  $\text{CD}_3\text{OD}$  at 600 MHz; (C)  $^{13}\text{C}$  NMR spectrum in  $\text{CD}_3\text{OD}$  at 150 MHz; (D) DEPT 135 spectrum in  $\text{CD}_3\text{OD}$  at 150 MHz; (E)  $^1\text{H}$ - $^1\text{H}$  COSY spectrum in  $\text{CD}_3\text{OD}$  at 600 MHz; (F) HSQC spectrum in  $\text{CD}_3\text{OD}$  at 600 MHz; (G) HMBC spectrum in  $\text{CD}_3\text{OD}$  at 600 MHz; (H) ROESY spectrum in  $\text{CD}_3\text{OD}$  at 600 MHz.

A

Monoisotopic Mass, Even Electron Ions  
 212 formula(e) evaluated with 1 results within limits (up to 50 closest results for each mass)  
 Elements Used:  
 C: 0-500 H: 0-1000 O: 0-200 Na: 0-1  
 59  
 20190107\_62 209 (1.687)

1: TOF MS ES+  
 1.20e+005

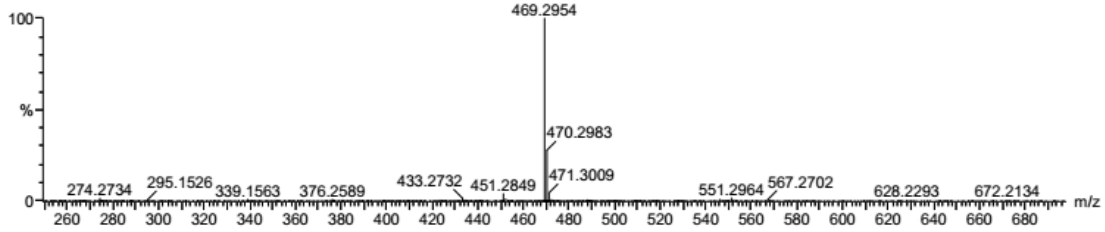

Minimum: -1.5  
 Maximum: 5.0 5.0 50.0

| Mass     | Calc. Mass | mDa | PPM | DBE | i-FIT | Norm | Conf (%) | Formula    |
|----------|------------|-----|-----|-----|-------|------|----------|------------|
| 469.2954 | 469.2954   | 0.0 | 0.0 | 9.5 | 295.2 | n/a  | n/a      | C29 H41 O5 |

B

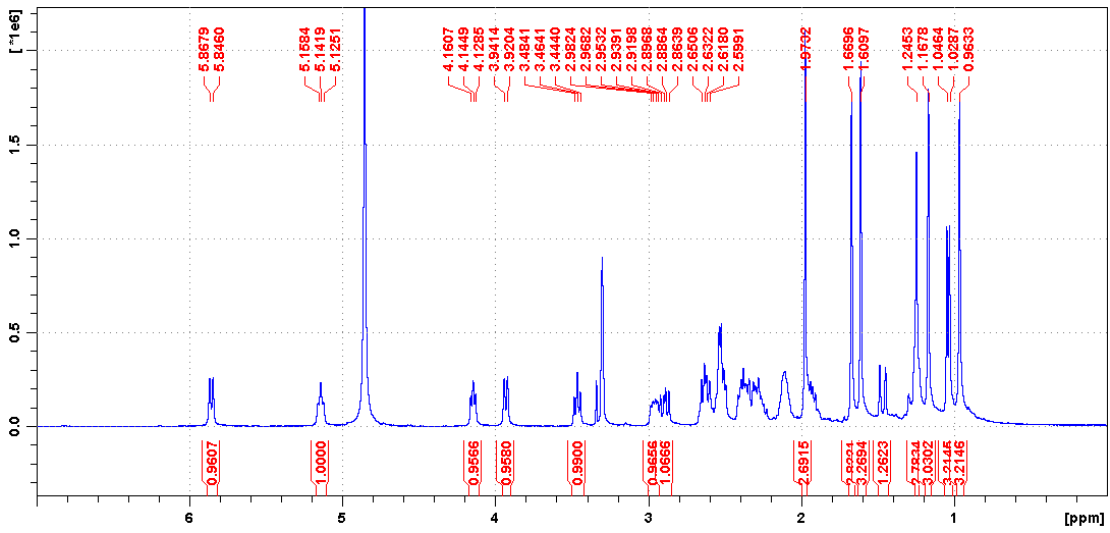

C

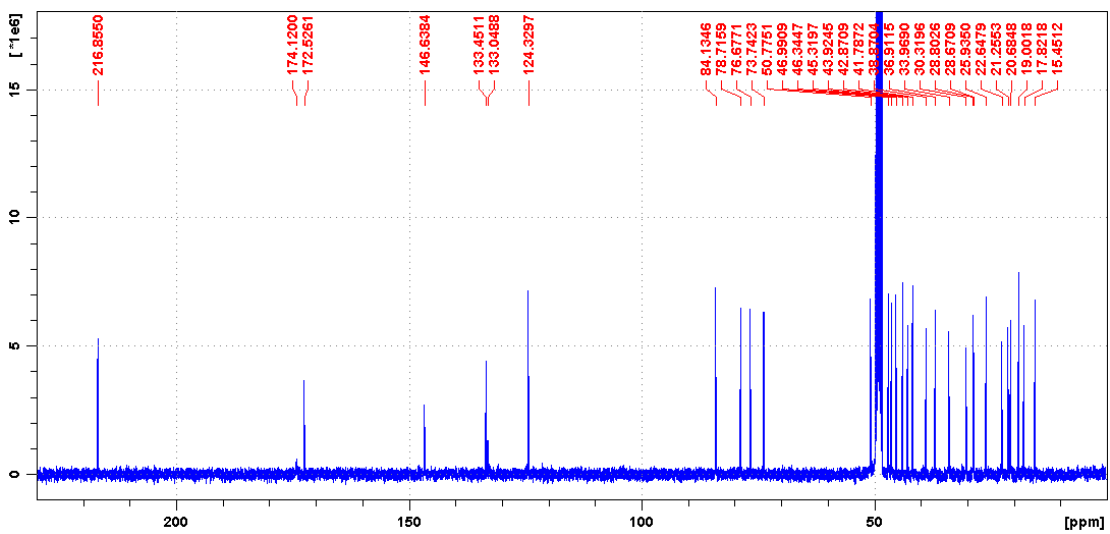

D

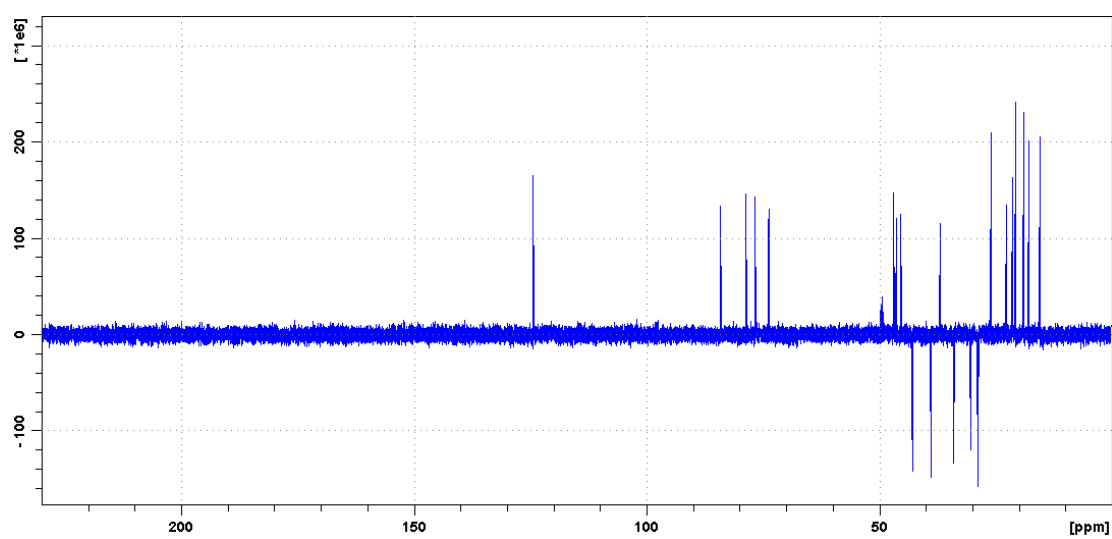

E

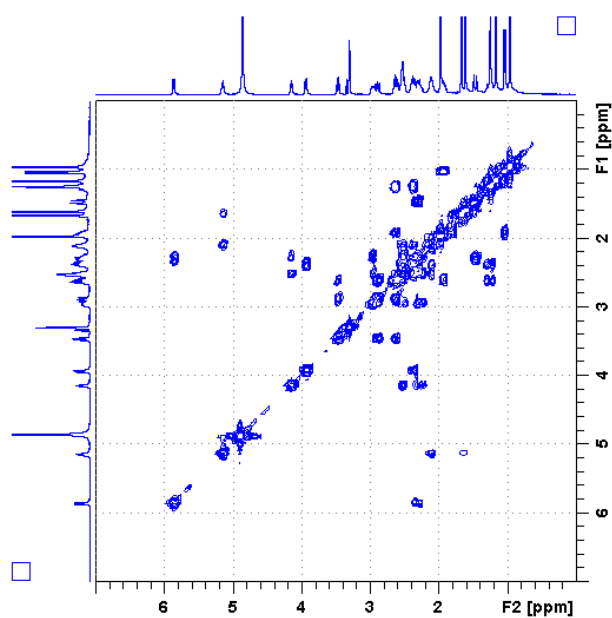

F

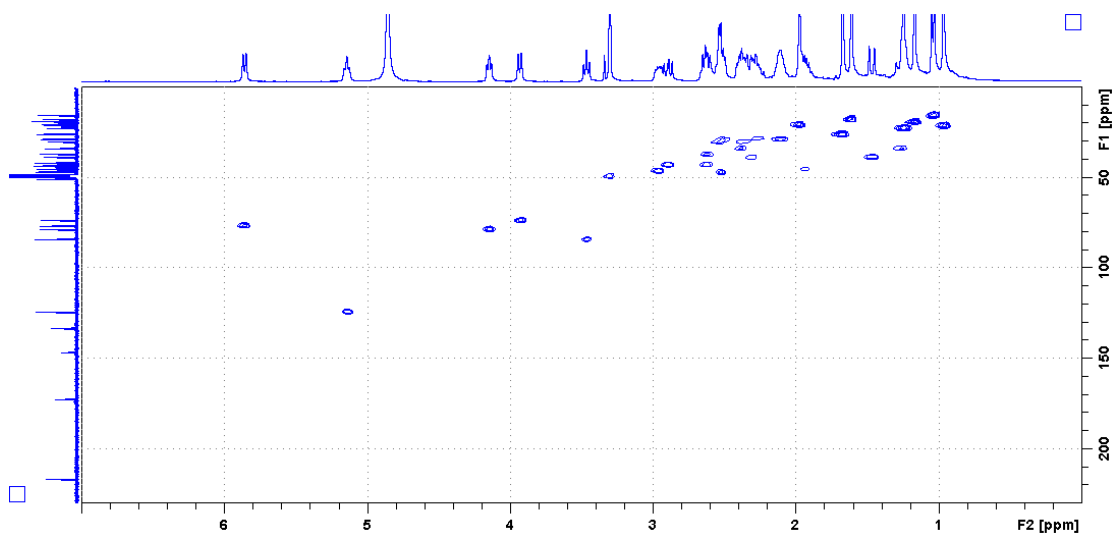

G

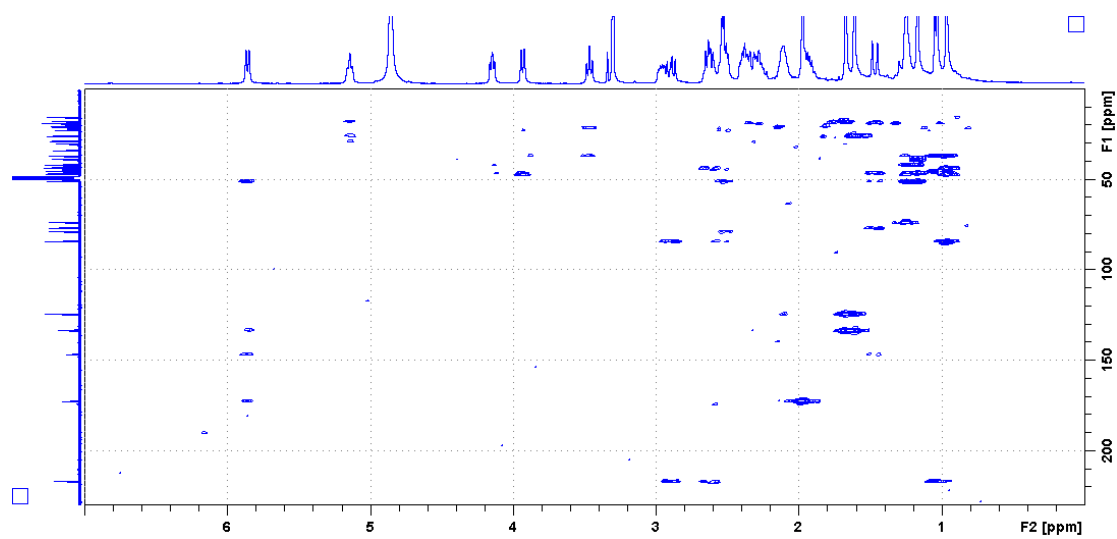

H

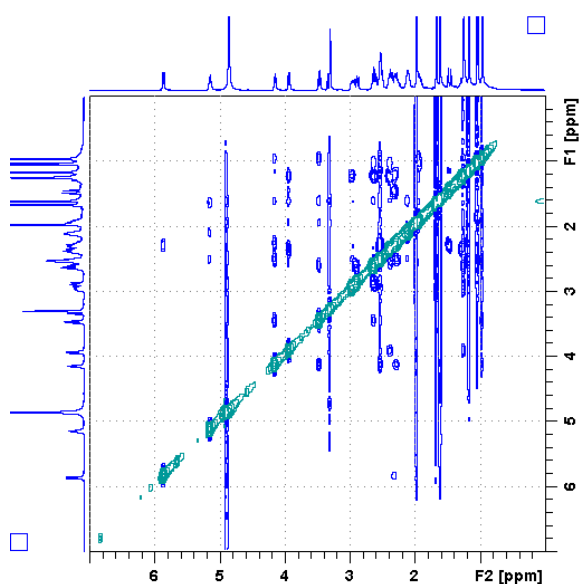

**Figure S33** HRESIMS and NMR spectra of **40**.

(A) HRESIMS spectrum; (B)  $^1\text{H}$  NMR spectrum in  $\text{CD}_3\text{OD}$  at 400 MHz; (C)  $^{13}\text{C}$  NMR spectrum in  $\text{CD}_3\text{OD}$  at 100 MHz; (D) DEPT 135 spectrum in  $\text{CD}_3\text{OD}$  at 100 MHz; (E)  $^1\text{H}$ - $^1\text{H}$  COSY spectrum in  $\text{CD}_3\text{OD}$  at 400 MHz; (F) HSQC spectrum in  $\text{CD}_3\text{OD}$  at 400 MHz; (G) HMBC spectrum in  $\text{CD}_3\text{OD}$  at 400 MHz; (H) ROESY spectrum in  $\text{CD}_3\text{OD}$  at 400 MHz.

A

Monoisotopic Mass, Even Electron Ions  
 285 formula(e) evaluated with 2 results within limits (up to 50 closest results for each mass)  
 Elements Used:  
 C: 0-500 H: 0-1000 O: 0-200 Na: 0-1  
 EB4C1-80-1-4  
 20190923048 219 (1.773)

1: TOF MS ES+  
 2.87e+004

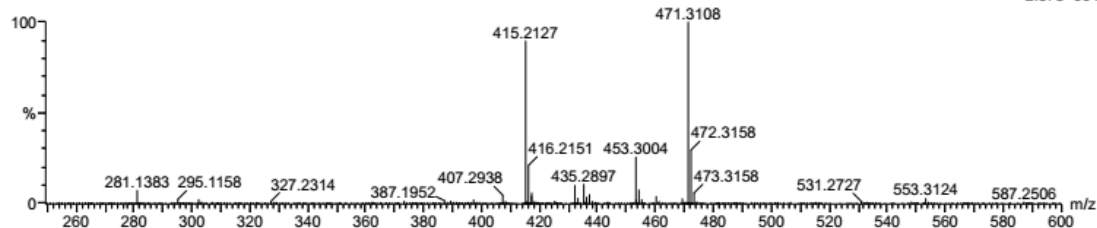

Minimum: -1.5  
 Maximum: 5.0 5.0 50.0

| Mass     | Calc. Mass | mDa  | PPM  | DBE  | i-FIT | Norm  | Conf (%) | Formula       |
|----------|------------|------|------|------|-------|-------|----------|---------------|
| 553.3124 | 553.3141   | -1.7 | -3.1 | 8.5  | 49.8  | 0.158 | 85.38    | C31 H46 O7 Na |
|          | 553.3107   | 1.7  | 3.1  | 20.5 | 51.6  | 1.923 | 14.62    | C40 H41 O2    |

B

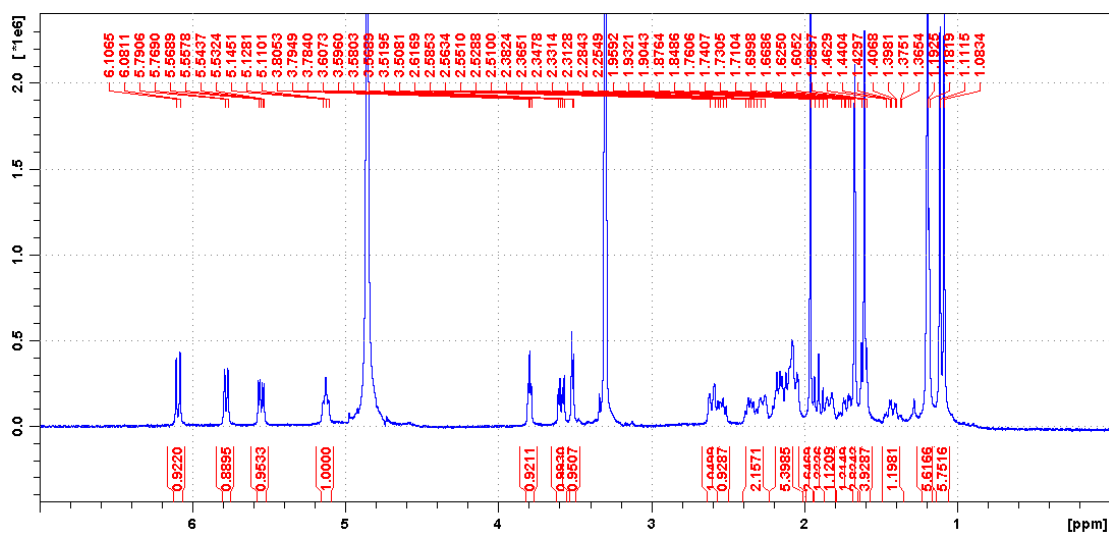

C

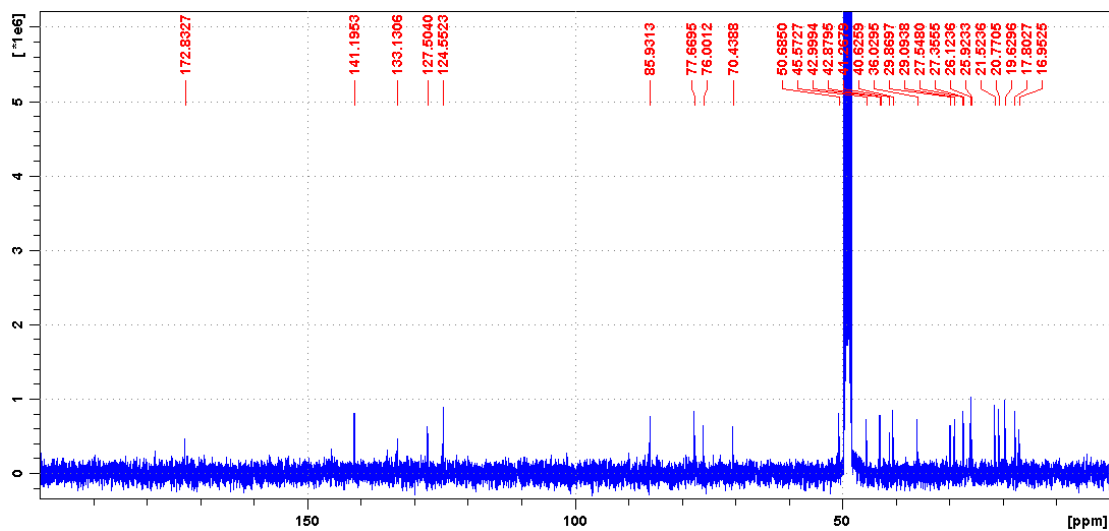

D

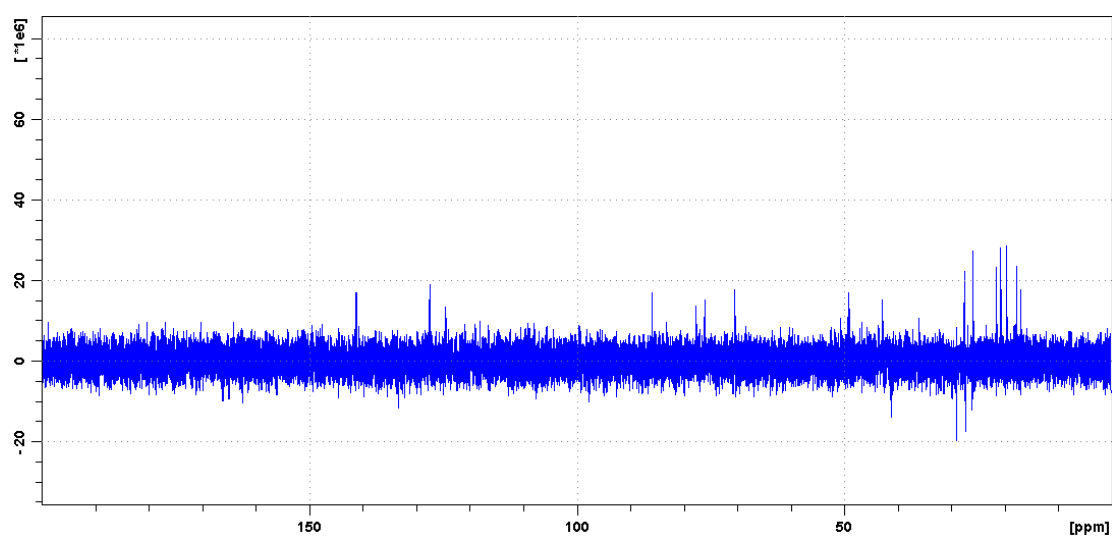

E

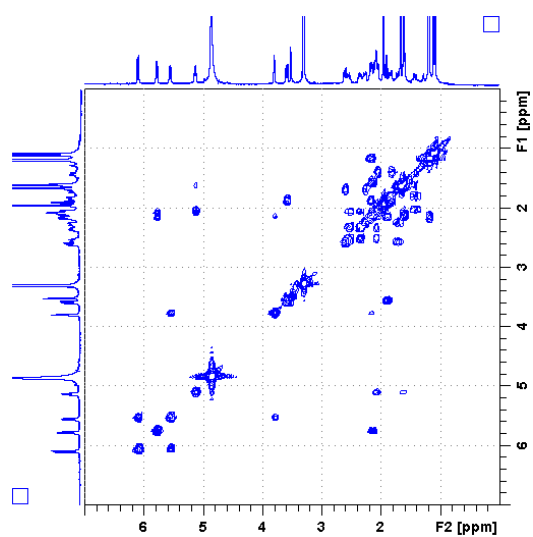

F

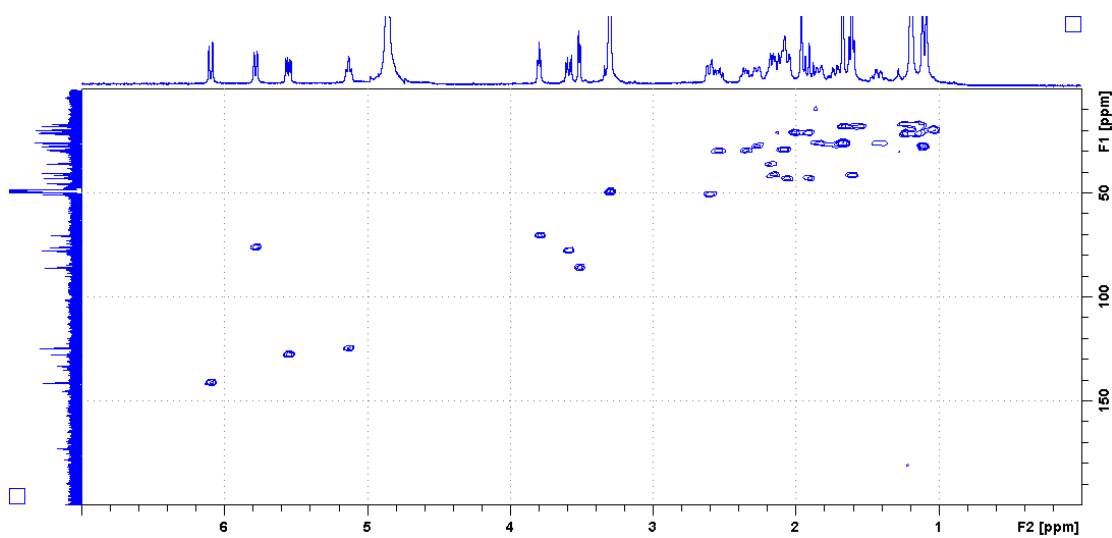

G



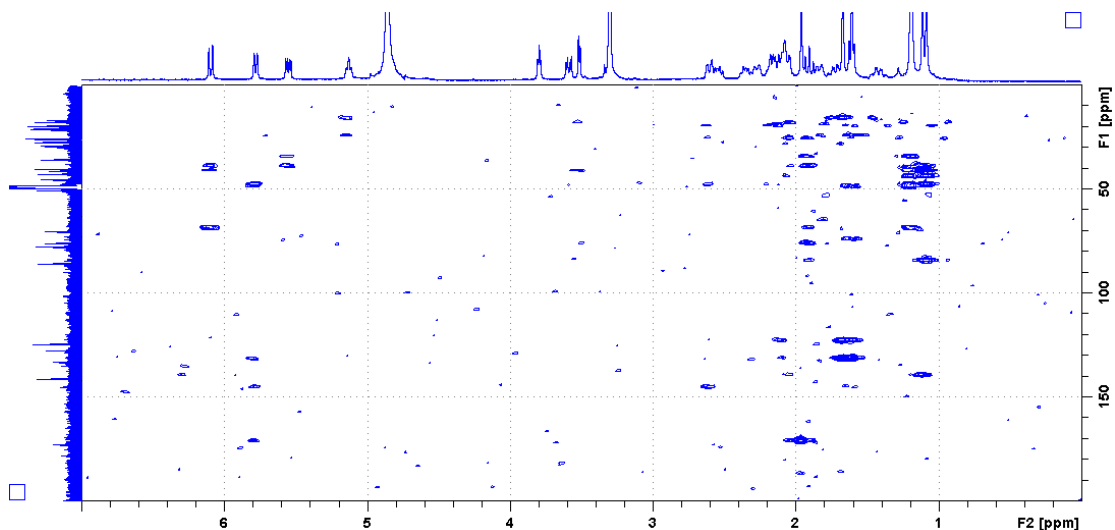

H

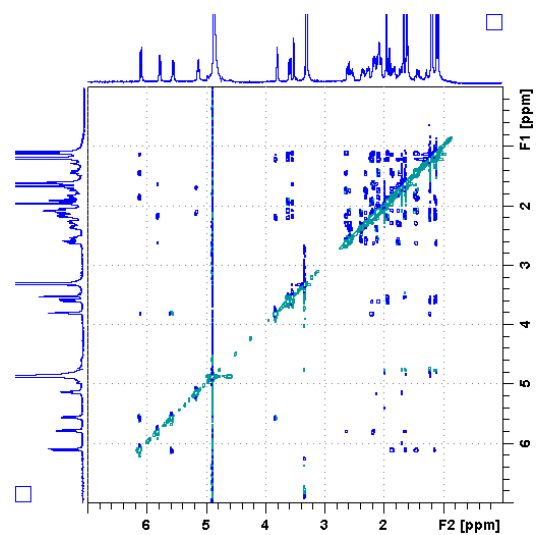

**Figure S34** HRESIMS and NMR spectra of **41**.

(A) HRESIMS spectrum; (B)  $^1\text{H}$  NMR spectrum in  $\text{CD}_3\text{OD}$  at 400 MHz; (C)  $^{13}\text{C}$  NMR spectrum in  $\text{CD}_3\text{OD}$  at 100 MHz; (D) DEPT 135 spectrum in  $\text{CD}_3\text{OD}$  at 100 MHz; (E)  $^1\text{H}$ - $^1\text{H}$  COSY spectrum in  $\text{CD}_3\text{OD}$  at 400 MHz; (F) HSQC spectrum in  $\text{CD}_3\text{OD}$  at 400 MHz; (G) HMBC spectrum in  $\text{CD}_3\text{OD}$  at 400 MHz; (H) ROESY spectrum in  $\text{CD}_3\text{OD}$  at 400 MHz.

A

Monoisotopic Mass, Even Electron Ions  
 243 formula(e) evaluated with 2 results within limits (up to 50 closest results for each mass)  
 Elements Used:  
 C: 0-200 H: 0-1000 O: 0-200 Na: 0-1  
 EB4C1-80-3  
 20190923036 229 (1.848)

1: TOF MS ES+  
 5.83e+004

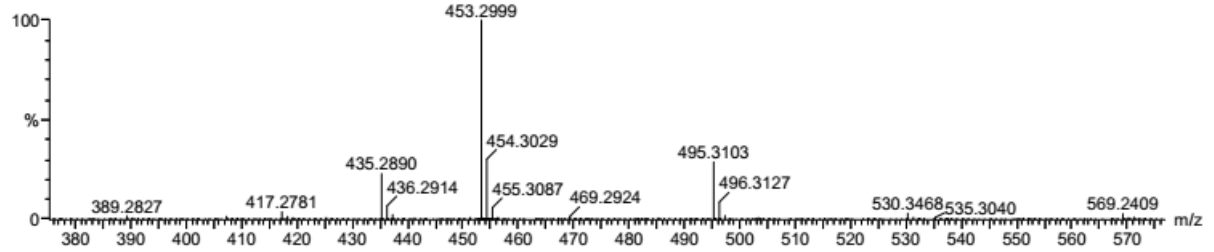

Minimum: -1.5  
 Maximum: 5.0 5.0 50.0

| Mass     | Calc. Mass | mDa  | PPM  | DBE  | i-FIT | Norm  | Conf (%) | Formula       |
|----------|------------|------|------|------|-------|-------|----------|---------------|
| 495.3103 | 495.3110   | -0.7 | -1.4 | 10.5 | 107.8 | 1.953 | 14.18    | C31 H43 O5    |
|          | 495.3086   | 1.7  | 3.4  | 7.5  | 106.0 | 0.153 | 85.82    | C29 H44 O5 Na |

B

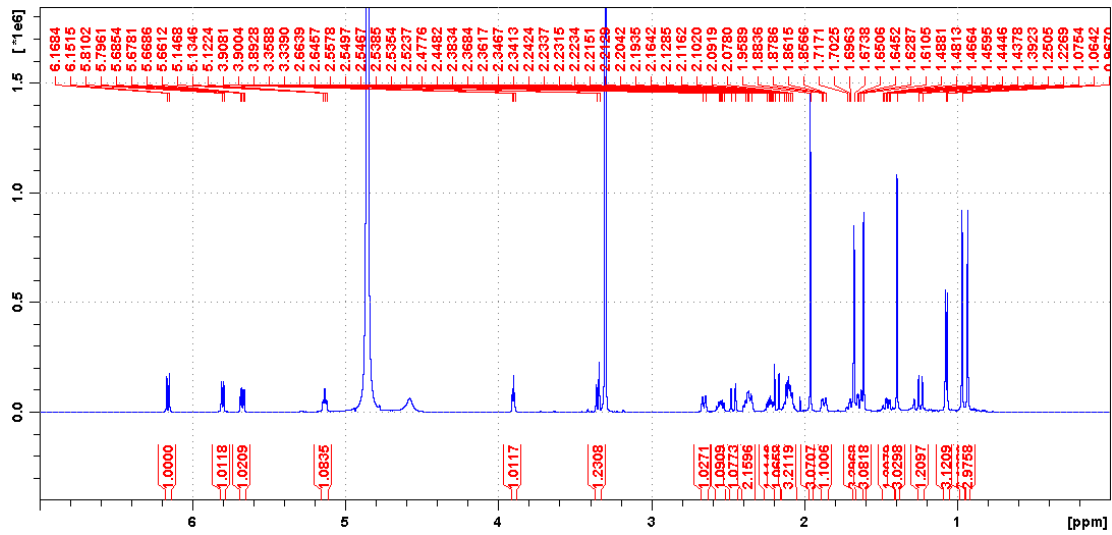

C

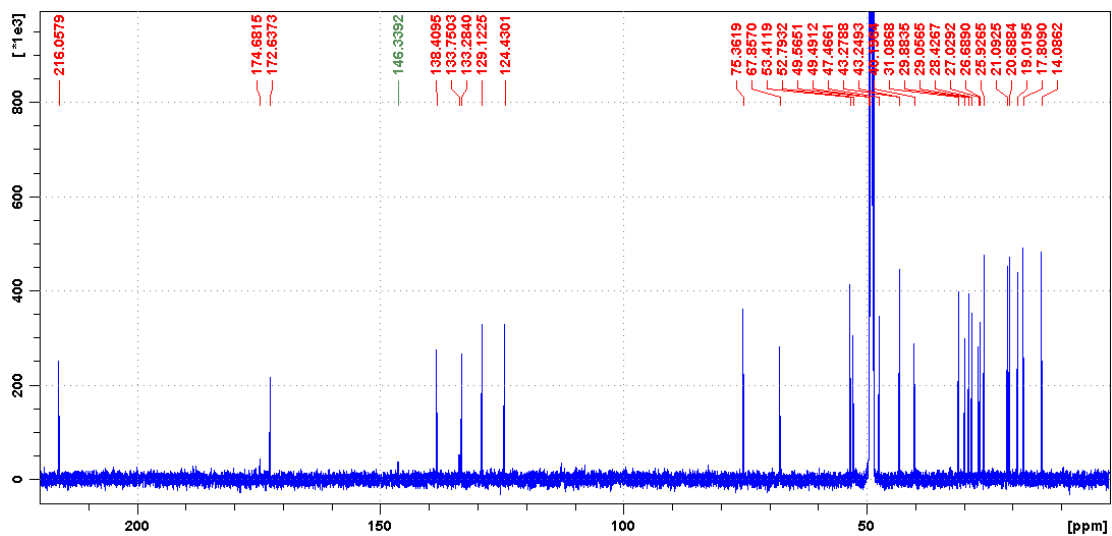

D

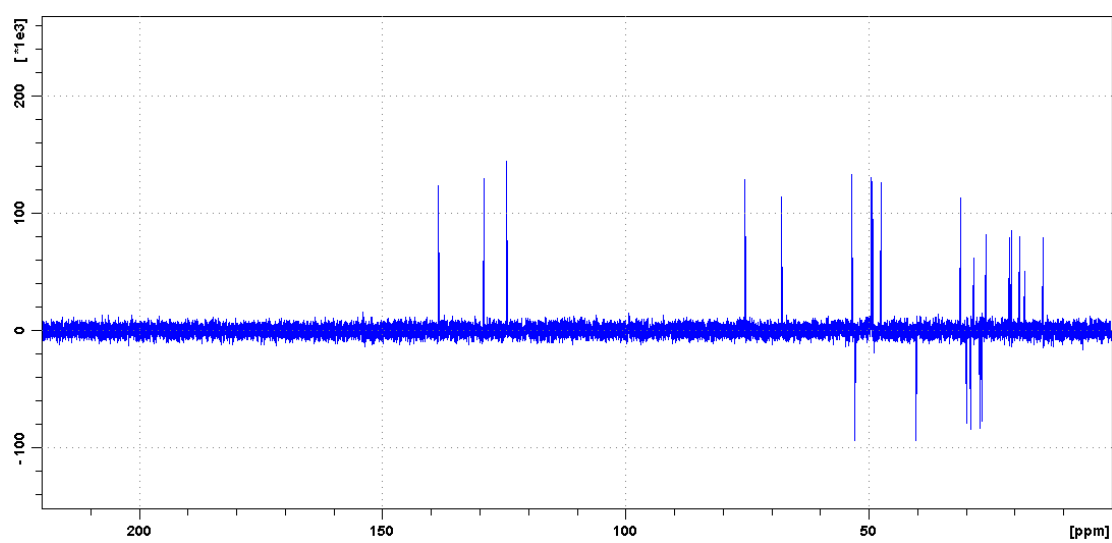

E

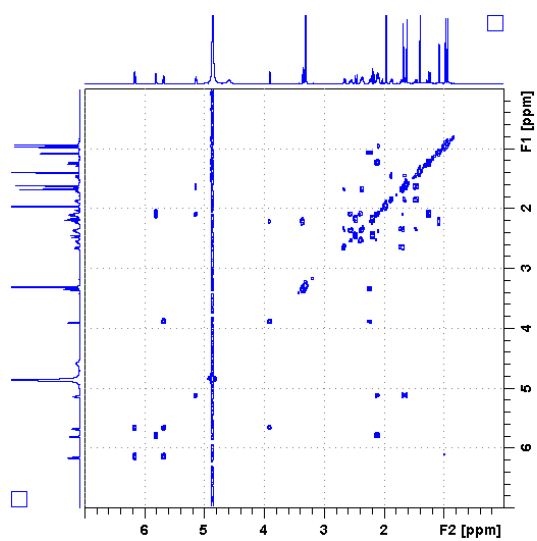

F

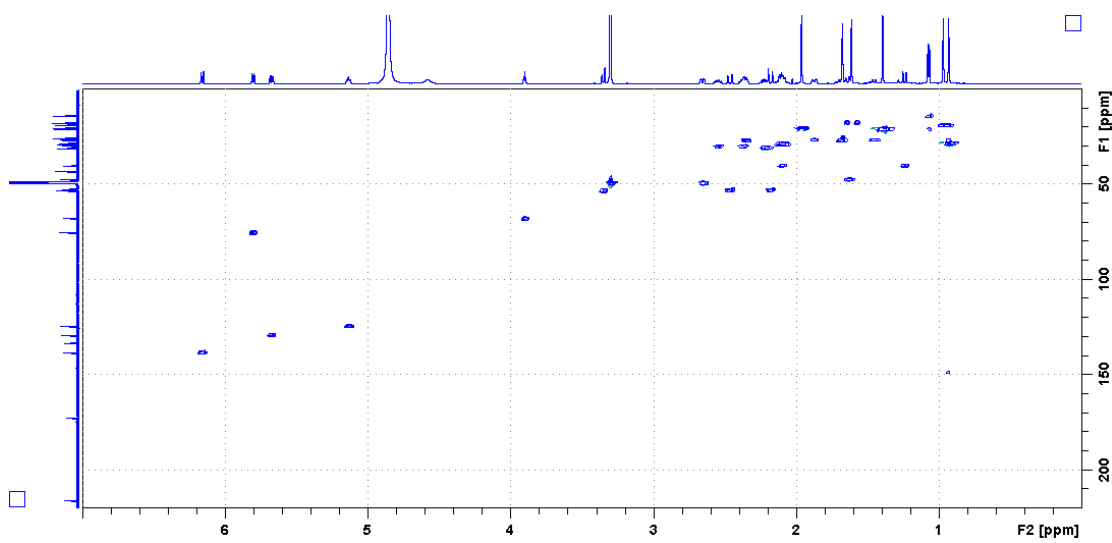

G

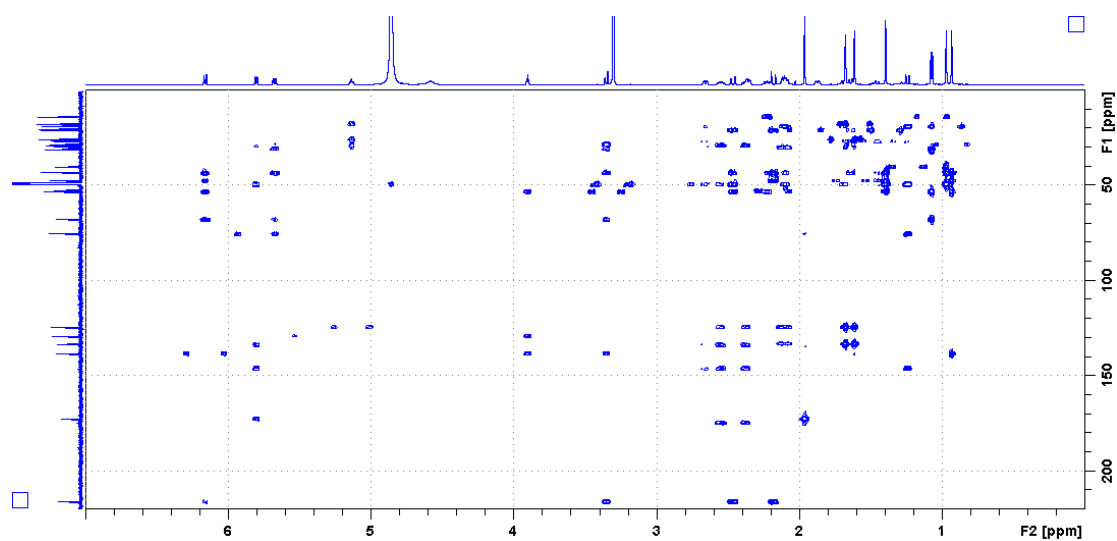

H

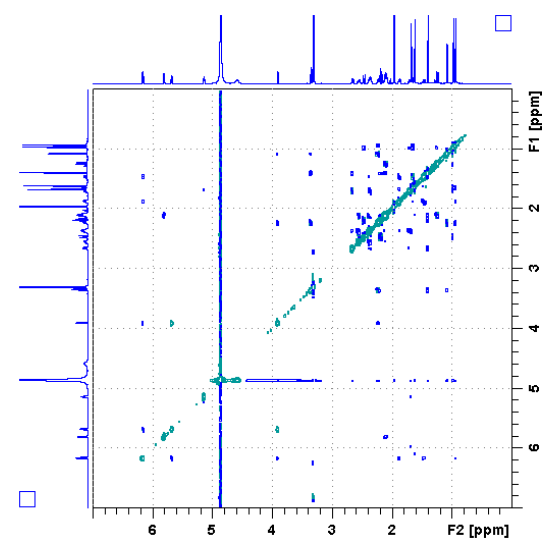

**Figure S35** HRESIMS and NMR spectra of **42**.

(A) HRESIMS spectrum; (B)  $^1\text{H}$  NMR spectrum in  $\text{CD}_3\text{OD}$  at 600 MHz; (C)  $^{13}\text{C}$  NMR spectrum in  $\text{CD}_3\text{OD}$  at 150 MHz; (D) DEPT 135 spectrum in  $\text{CD}_3\text{OD}$  at 150 MHz; (E)  $^1\text{H}$ - $^1\text{H}$  COSY spectrum in  $\text{CD}_3\text{OD}$  at 600 MHz; (F) HSQC spectrum in  $\text{CD}_3\text{OD}$  at 600 MHz; (G) HMBC spectrum in  $\text{CD}_3\text{OD}$  at 600 MHz; (H) ROESY spectrum in  $\text{CD}_3\text{OD}$  at 600 MHz.

A

Monoisotopic Mass, Even Electron Ions  
 270 formula(e) evaluated with 2 results within limits (up to 50 closest results for each mass)  
 Elements Used:  
 C: 0-500 H: 0-1000 O: 0-200 Na: 0-1  
 EB4C1-6-3-2  
 20190902-27 241 (1.948)

1: TOF MS ES+  
 1.52e+004

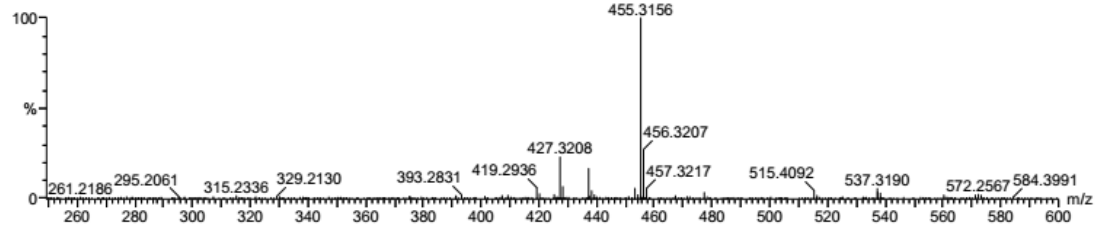

Minimum: -1.5  
 Maximum: 5.0 5.0 50.0

| Mass     | Calc. Mass | mDa  | PPM  | DBE  | i-FIT | Norm  | Conf (%) | Formula       |
|----------|------------|------|------|------|-------|-------|----------|---------------|
| 537.3190 | 537.3192   | -0.2 | -0.4 | 8.5  | 82.0  | 0.130 | 87.79    | C31 H46 O6 Na |
|          | 537.3216   | -2.6 | -4.8 | 11.5 | 84.0  | 2.103 | 12.21    | C33 H45 O6    |

B

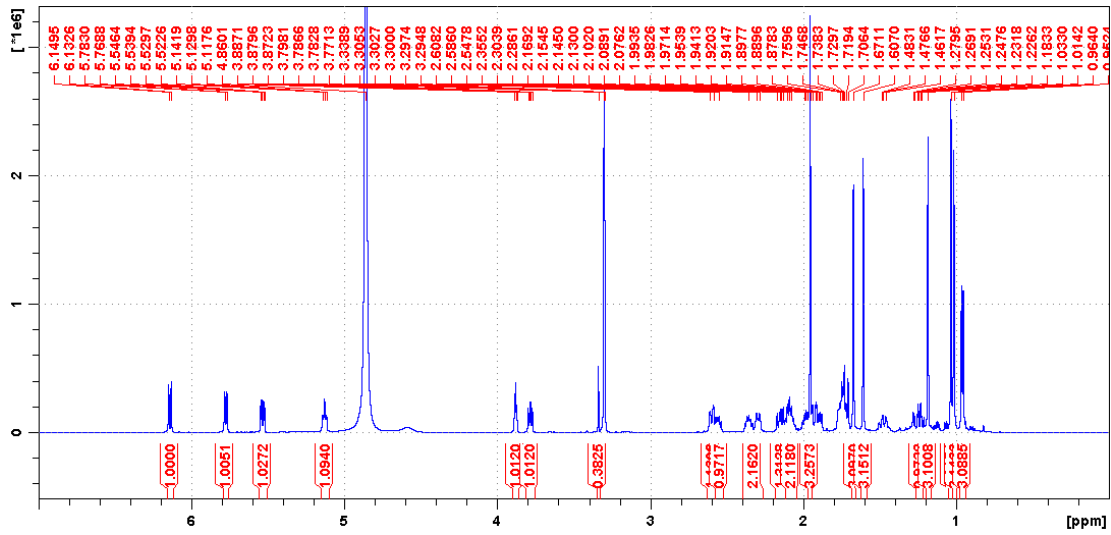

C

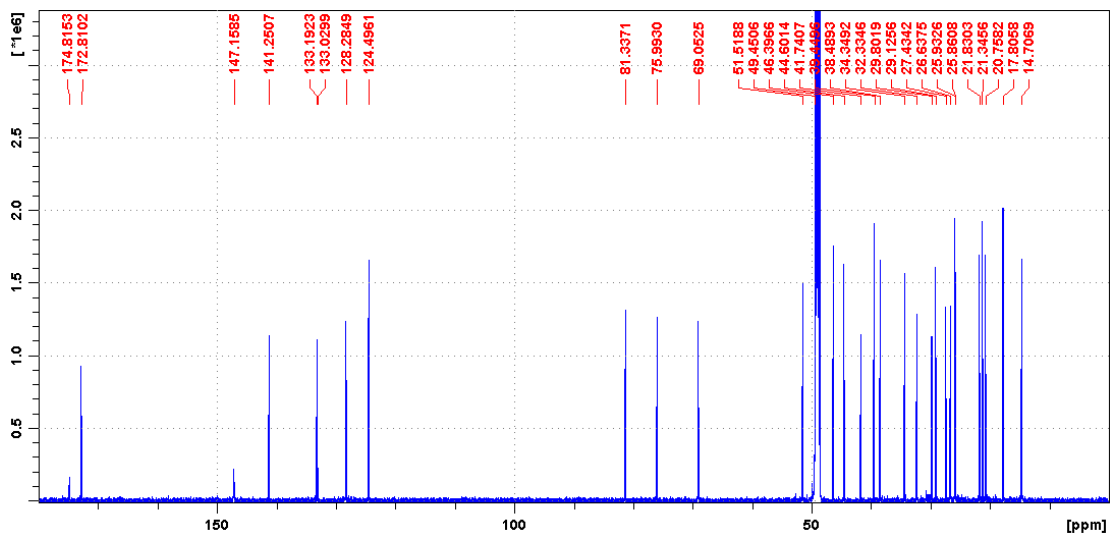

D

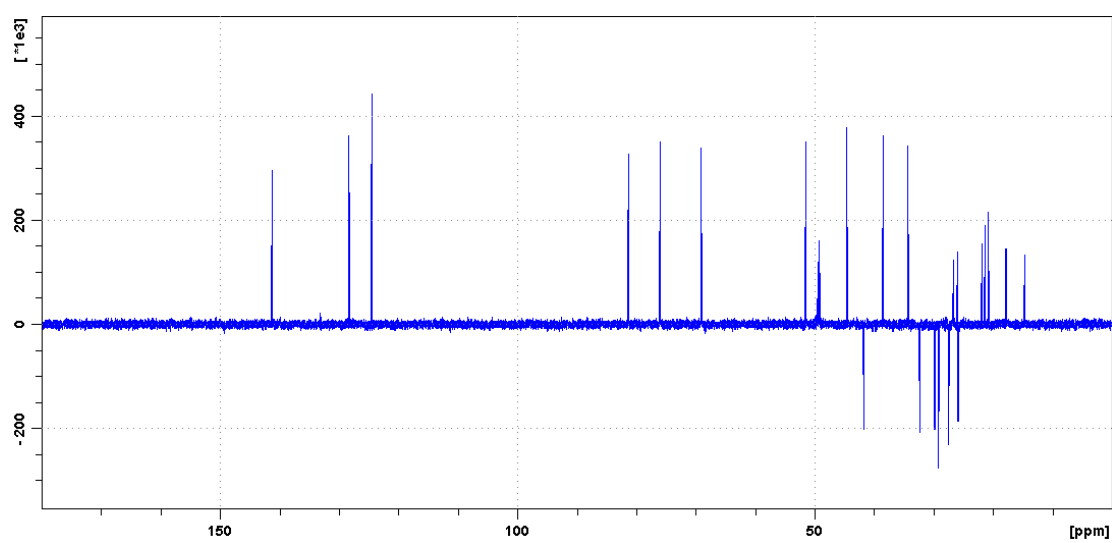

E

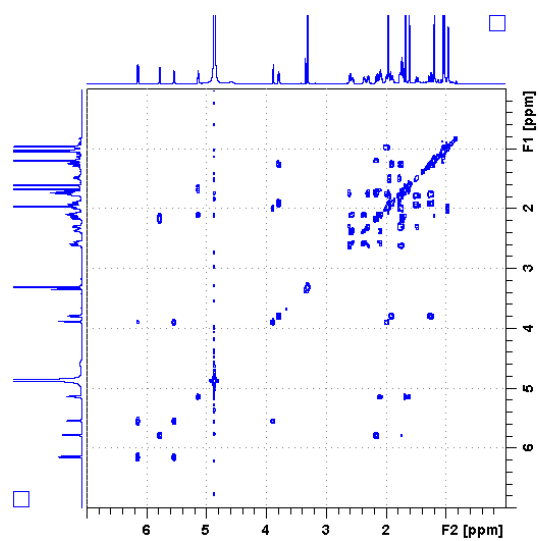

F

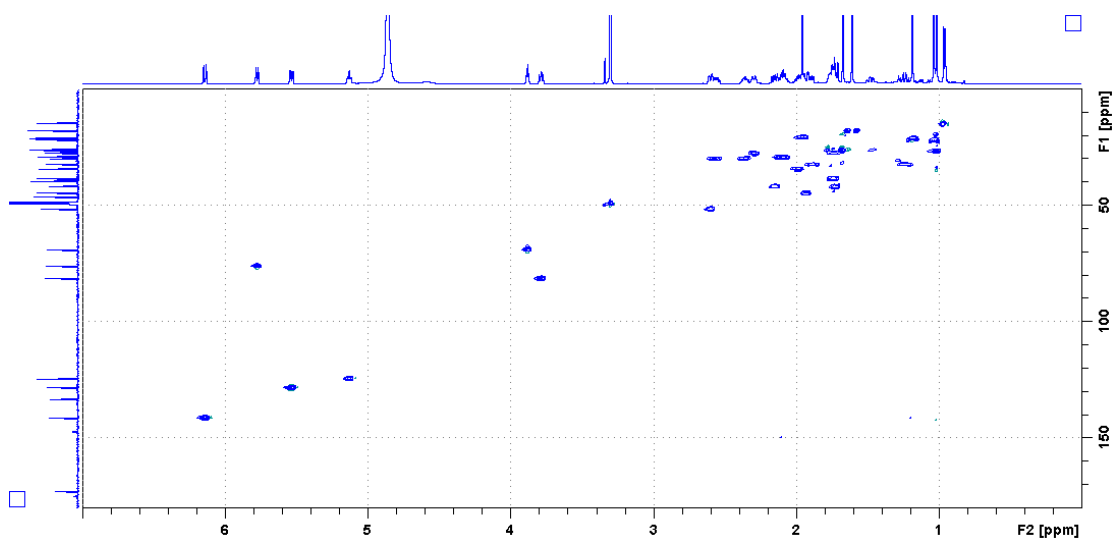

G

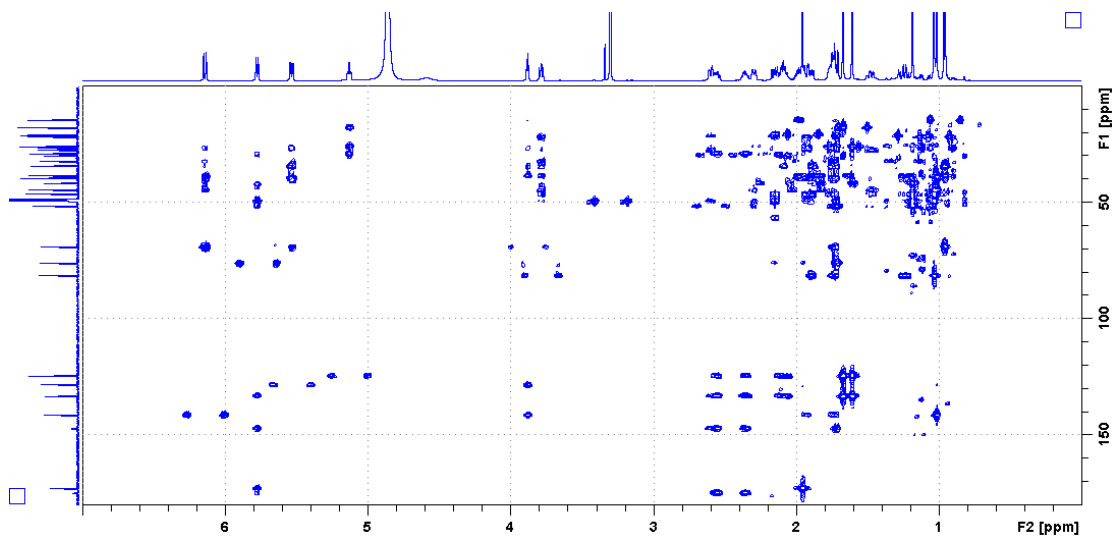

H

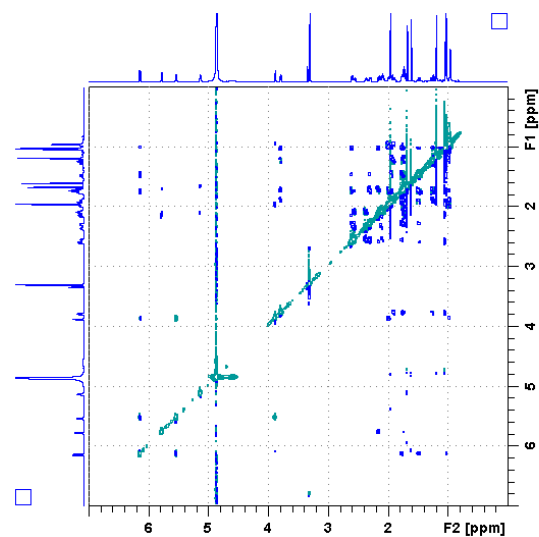

**Figure S36** HRESIMS and NMR spectra of **43**.

(A) HRESIMS spectrum; (B)  $^1\text{H}$  NMR spectrum in  $\text{CD}_3\text{OD}$  at 600 MHz; (C)  $^{13}\text{C}$  NMR spectrum in  $\text{CD}_3\text{OD}$  at 150 MHz; (D) DEPT 135 spectrum in  $\text{CD}_3\text{OD}$  at 150 MHz; (E)  $^1\text{H}$ - $^1\text{H}$  COSY spectrum in  $\text{CD}_3\text{OD}$  at 600 MHz; (F) HSQC spectrum in  $\text{CD}_3\text{OD}$  at 600 MHz; (G) HMBC spectrum in  $\text{CD}_3\text{OD}$  at 600 MHz; (H) ROESY spectrum in  $\text{CD}_3\text{OD}$  at 600 MHz.

A

Monoisotopic Mass, Even Electron Ions  
 324 formula(e) evaluated with 2 results within limits (up to 50 closest results for each mass)  
 Elements Used:  
 C: 0-500 H: 0-1000 O: 0-200 Na: 0-1  
 34  
 20190107\_38 230 (1.855)

1: TOF MS ES+  
 5.01e+04

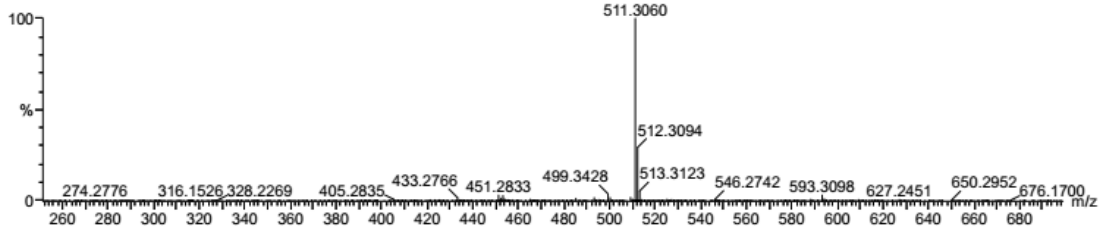

Minimum: -1.5  
 Maximum: 5.0 5.0 50.0

| Mass     | Calc. Mass | mDa  | PPM  | DBE  | i-FIT | Norm  | Conf (%) | Formula       |
|----------|------------|------|------|------|-------|-------|----------|---------------|
| 593.3098 | 593.3090   | 0.8  | 1.3  | 10.5 | 55.3  | 0.295 | 74.44    | C33 H46 O8 Na |
|          | 593.3114   | -1.6 | -2.7 | 13.5 | 56.4  | 1.364 | 25.56    | C35 H45 O8    |

B

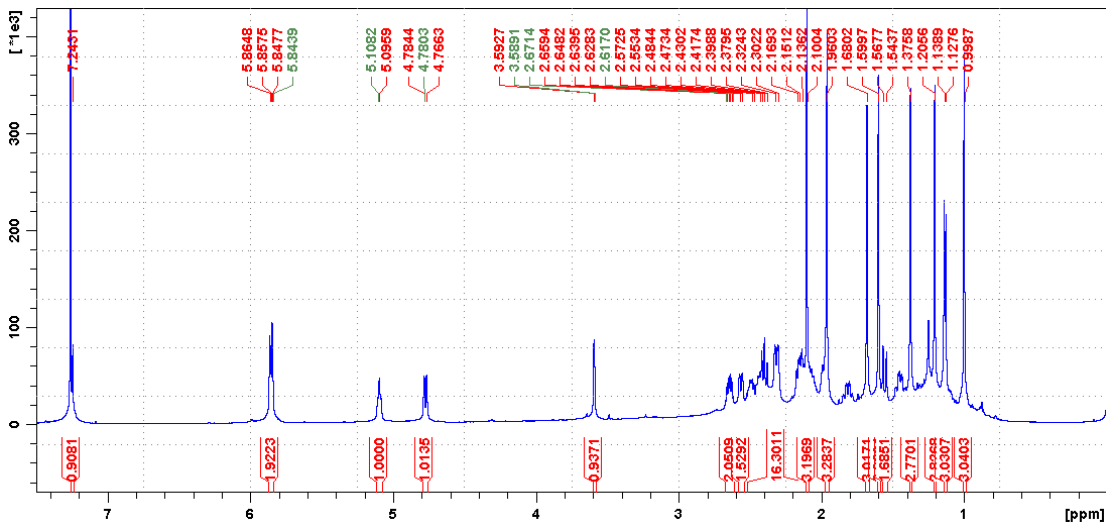

C

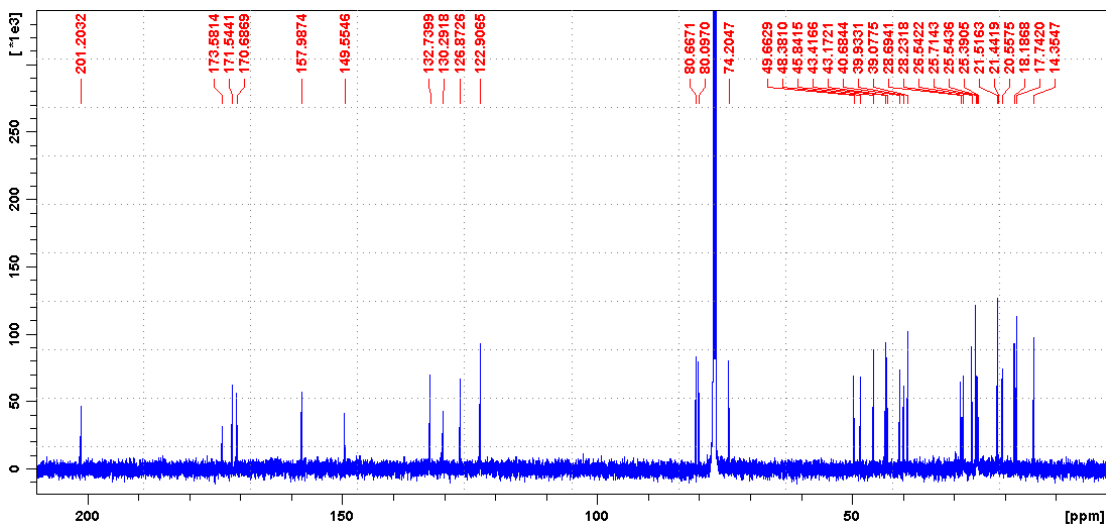



D

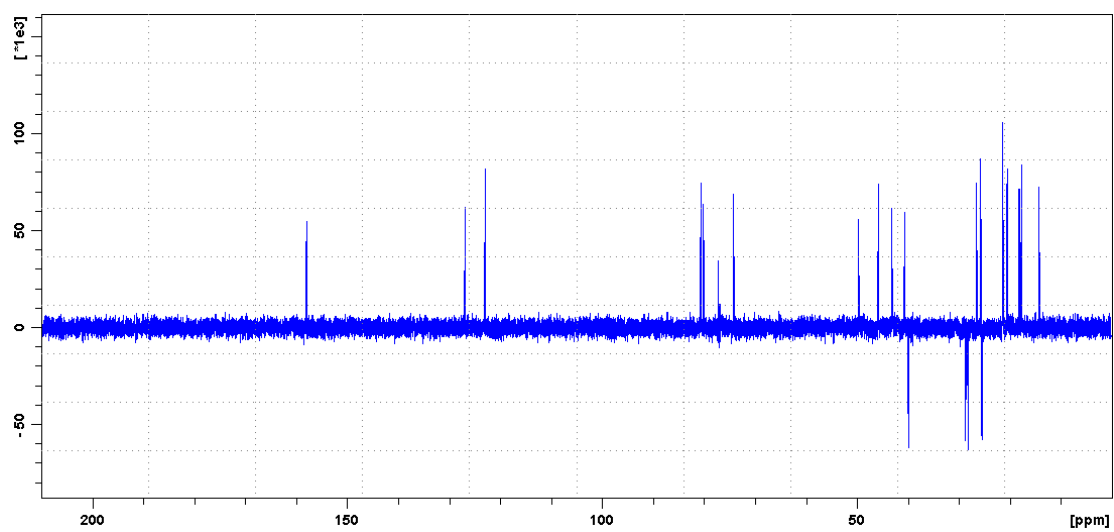

E

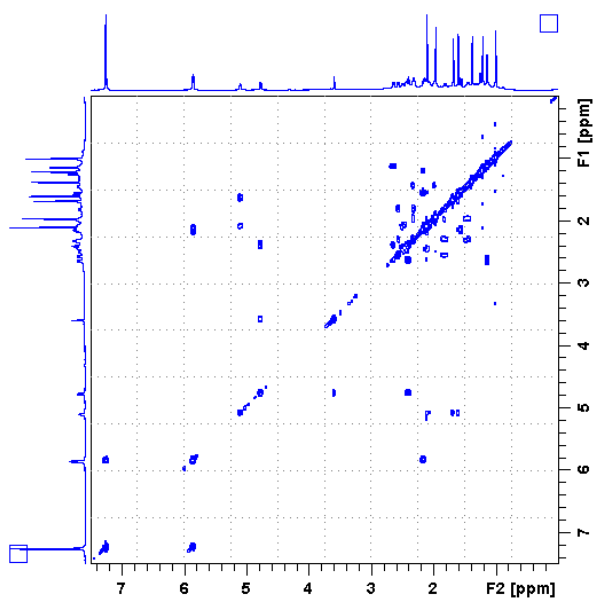

F

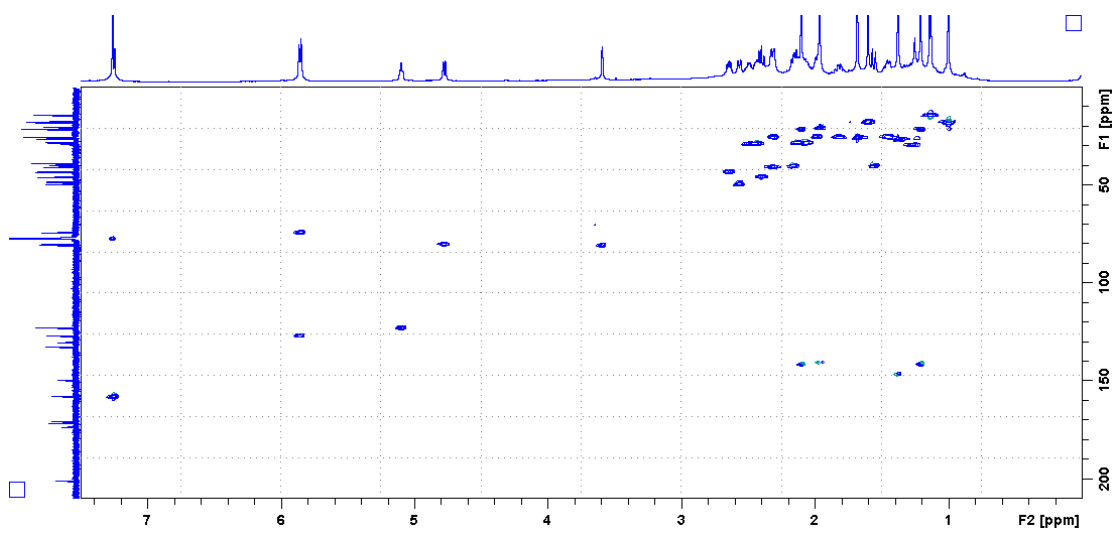

G

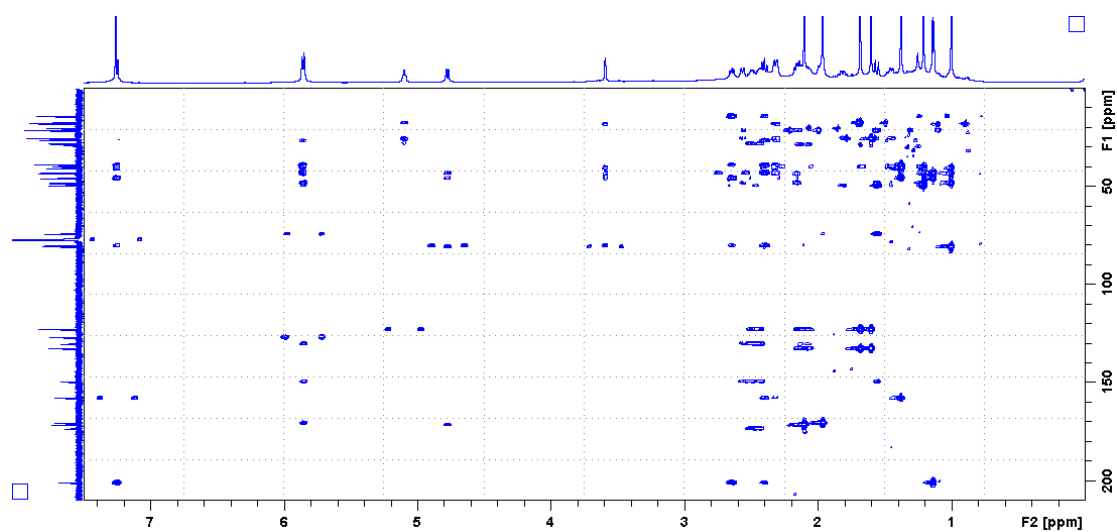

H

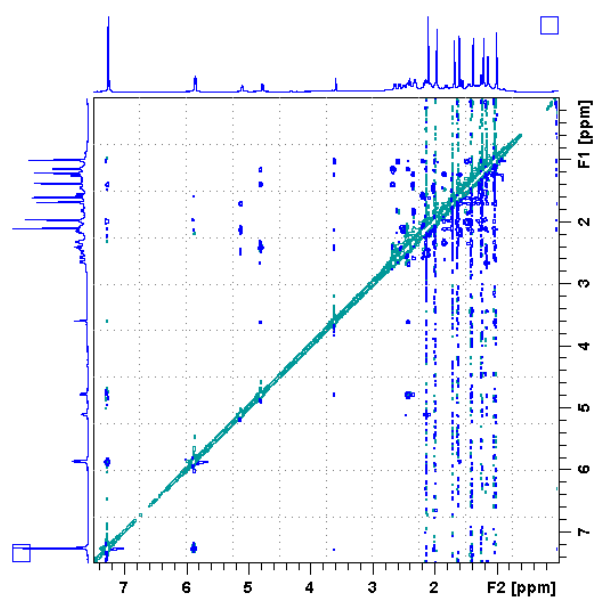

**Figure S37** HRESIMS and NMR spectra of **44**.

(A) HRESIMS spectrum; (B)  $^1\text{H}$  NMR spectrum in  $\text{CDCl}_3$  at 600 MHz; (C)  $^{13}\text{C}$  NMR spectrum in  $\text{CDCl}_3$  at 150 MHz; (D) DEPT 135 spectrum in  $\text{CDCl}_3$  at 150 MHz; (E)  $^1\text{H}$ - $^1\text{H}$  COSY spectrum in  $\text{CDCl}_3$  at 600 MHz; (F) HSQC spectrum in  $\text{CDCl}_3$  at 600 MHz; (G) HMBC spectrum in  $\text{CDCl}_3$  at 600 MHz; (H) NOESY spectrum in  $\text{CDCl}_3$  at 600 MHz.

A

Monoisotopic Mass, Even Electron Ions  
 324 formula(e) evaluated with 2 results within limits (up to 50 closest results for each mass)  
 Elements Used:  
 C: 0-500 H: 0-1000 O: 0-200 Na: 0-1  
 33  
 20190107\_37 231 (1.862)

1: TOF MS ES+  
 3.63e+004

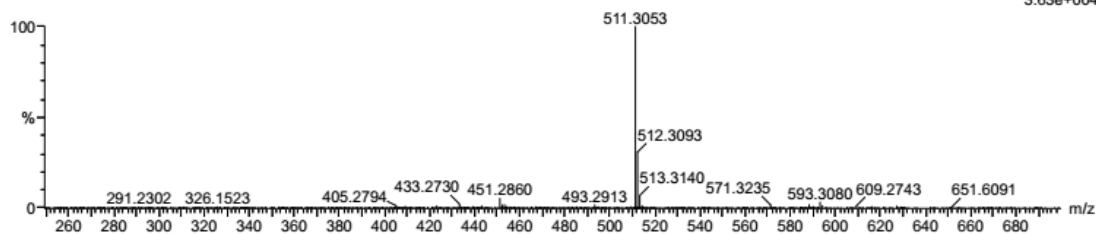

| Mass     | Calc. Mass | mDa  | PPM  | DBE  | i-FIT | Norm  | Conf (%) | Formula       |
|----------|------------|------|------|------|-------|-------|----------|---------------|
| 593.3080 | 593.3090   | -1.0 | -1.7 | 10.5 | 17.5  | 0.219 | 80.35    | C33 H46 O8 Na |
|          | 593.3056   | 2.4  | 4.0  | 22.5 | 18.9  | 1.627 | 19.65    | C42 H41 O3    |

B

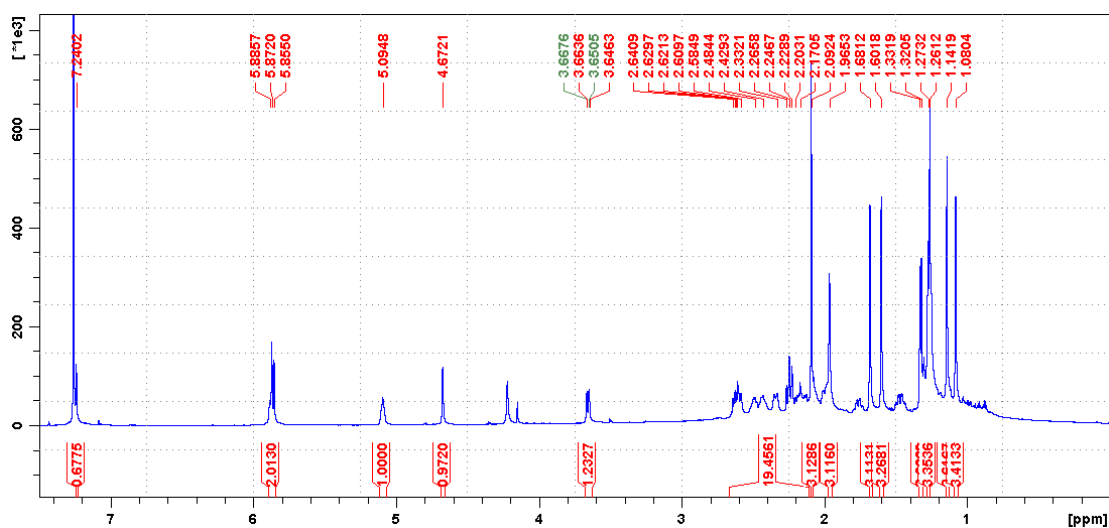

C

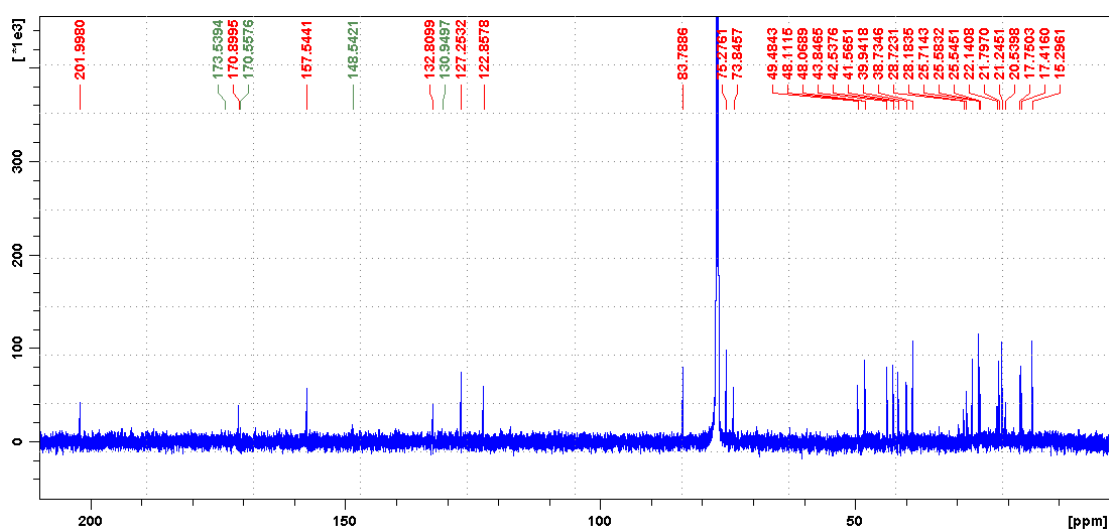

D

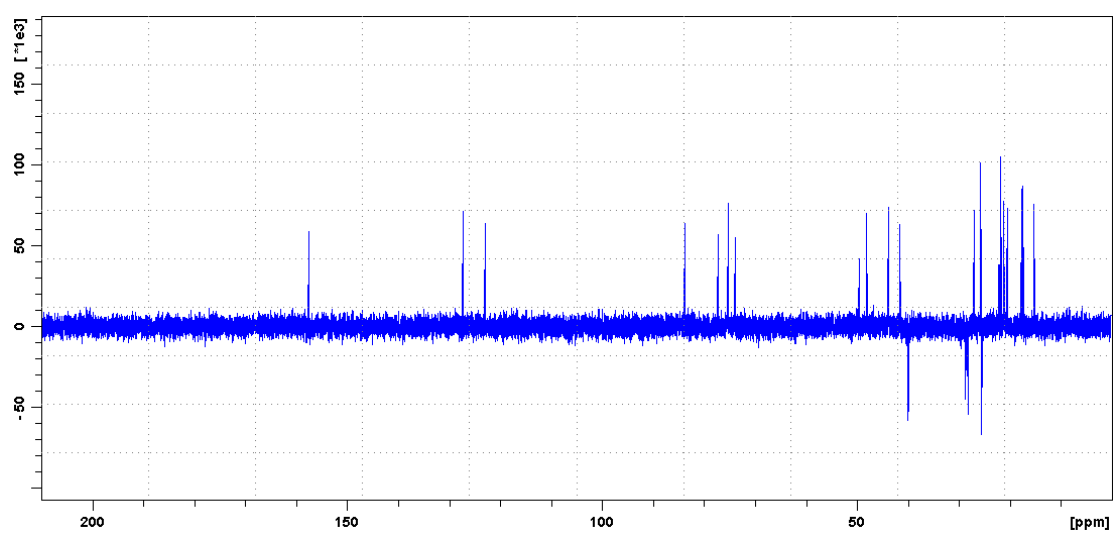

E

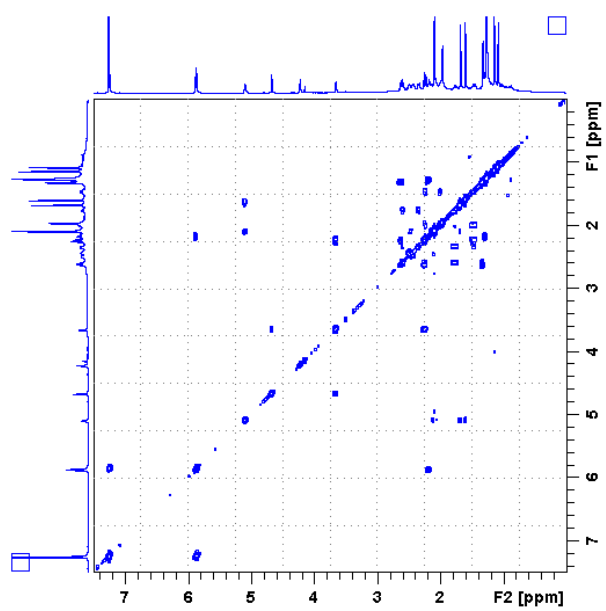

F

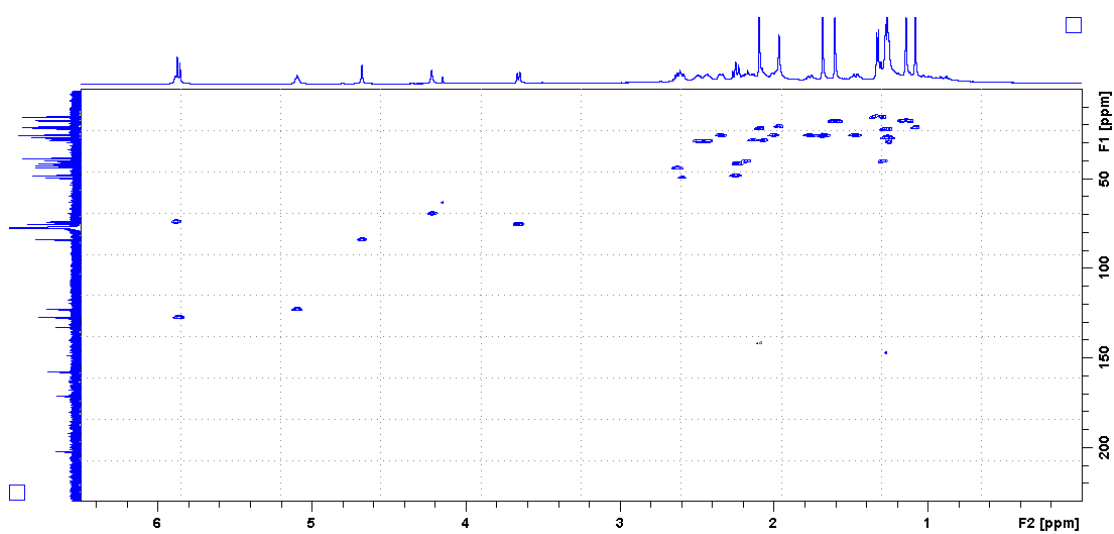

G

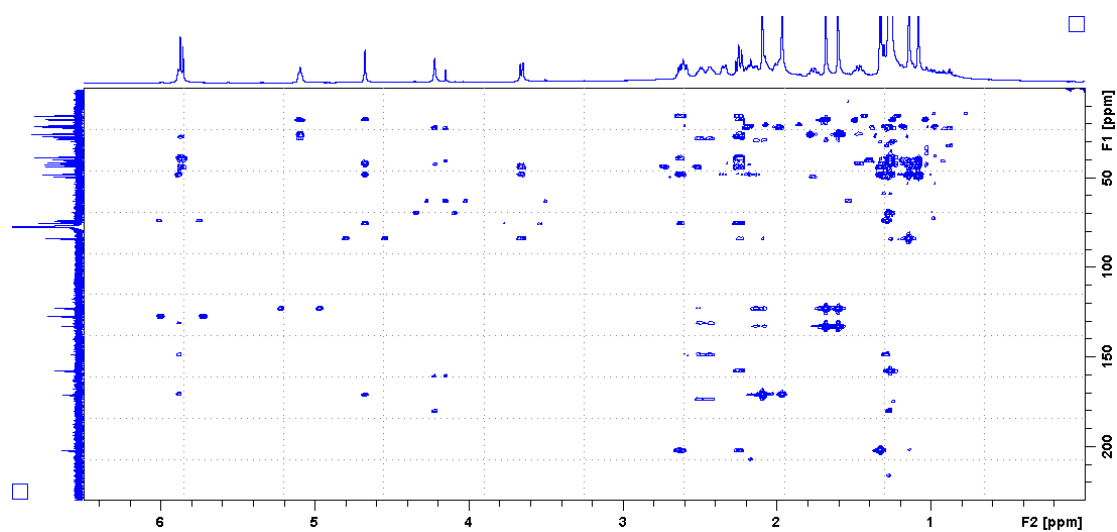

H

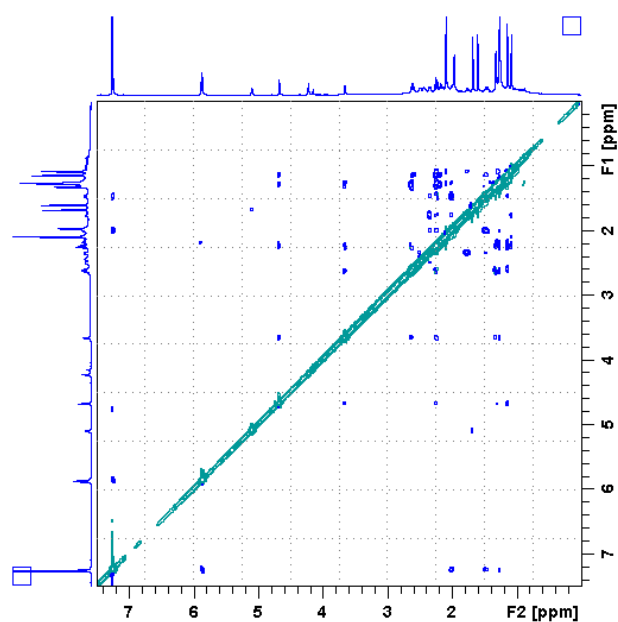

**Figure S38** HRESIMS and NMR spectra of **45**.

(A) HRESIMS spectrum; (B)  $^1\text{H}$  NMR spectrum in  $\text{CDCl}_3$  at 600 MHz; (C)  $^{13}\text{C}$  NMR spectrum in  $\text{CDCl}_3$  at 150 MHz; (D) DEPT 135 spectrum in  $\text{CDCl}_3$  at 150 MHz; (E)  $^1\text{H}$ - $^1\text{H}$  COSY spectrum in  $\text{CDCl}_3$  at 600 MHz; (F) HSQC spectrum in  $\text{CDCl}_3$  at 600 MHz; (G) HMBC spectrum in  $\text{CDCl}_3$  at 600 MHz; (H) ROESY spectrum in  $\text{CDCl}_3$  at 600 MHz.

A

Monoisotopic Mass, Even Electron Ions  
 308 formula(e) evaluated with 2 results within limits (up to 50 closest results for each mass)  
 Elements Used:  
 C: 0-500 H: 0-1000 O: 0-200 Na: 0-1  
 35  
 20190107\_39 243 (1.964)

1: TOF MS ES+  
 6.09e+003

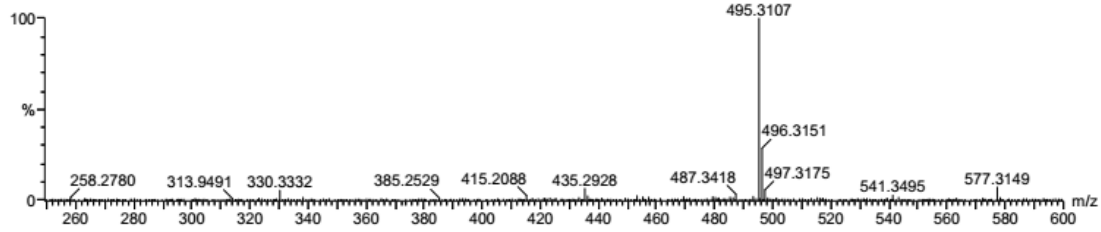

|          |            |      |      |      |       |       |          |               |      |
|----------|------------|------|------|------|-------|-------|----------|---------------|------|
| Minimum: |            |      |      |      |       |       |          |               | -1.5 |
| Maximum: | 5.0        | 5.0  |      |      |       |       |          |               | 50.0 |
| Mass     | Calc. Mass | mDa  | PPM  | DBE  | i-FIT | Norm  | Conf (%) | Formula       |      |
| 577.3149 | 577.3141   | 0.8  | 1.4  | 10.5 | 41.6  | 0.236 | 78.98    | C33 H46 O7 Na |      |
|          | 577.3165   | -1.6 | -2.8 | 13.5 | 42.9  | 1.560 | 21.02    | C35 H45 O7    |      |

B

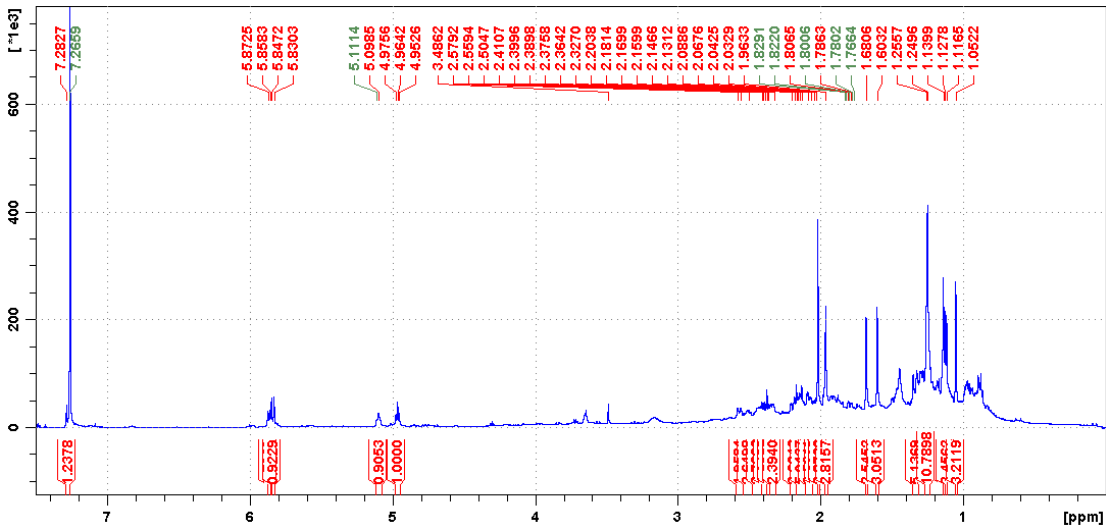

C

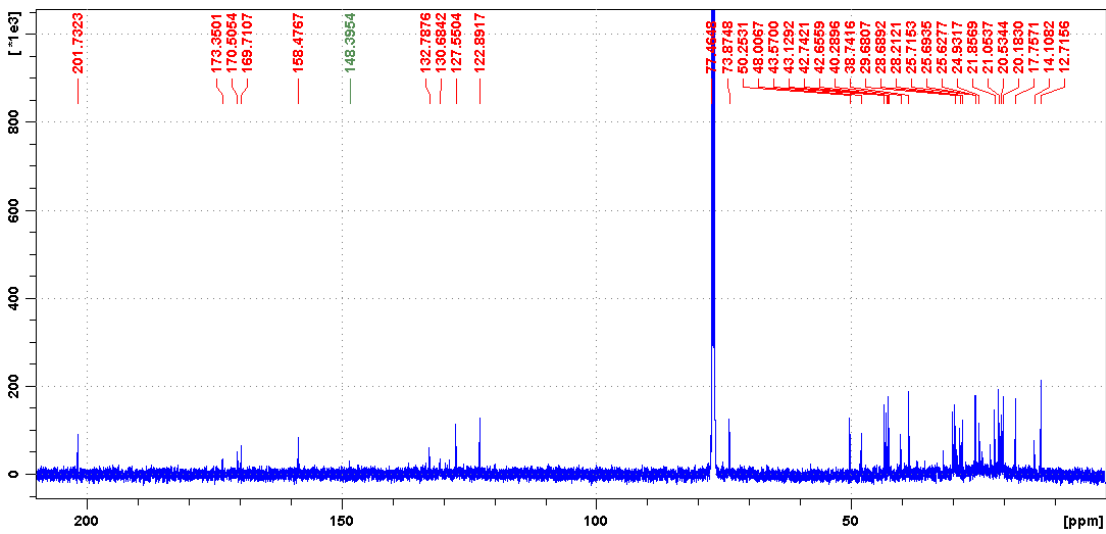

D

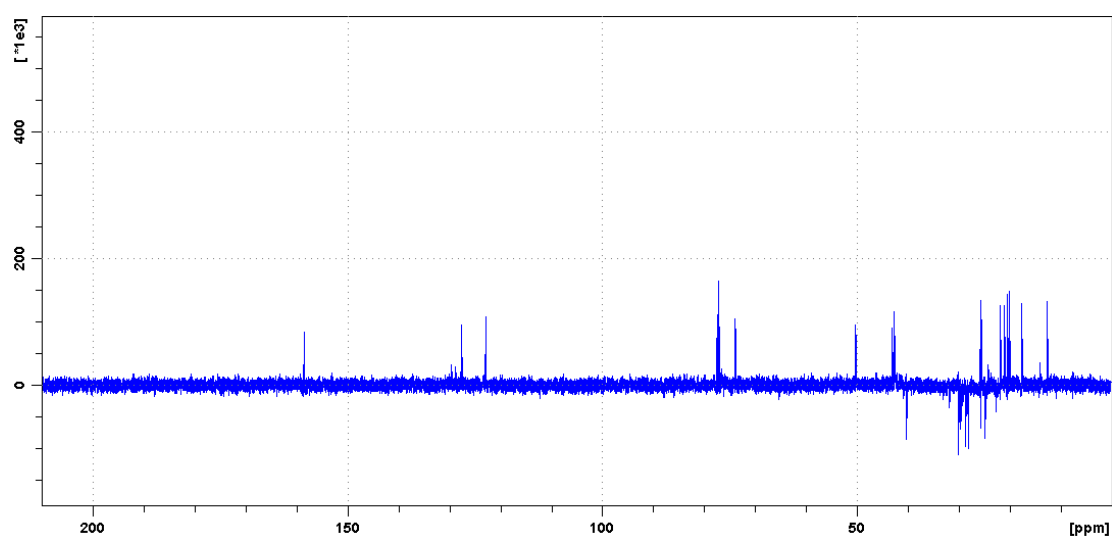

E

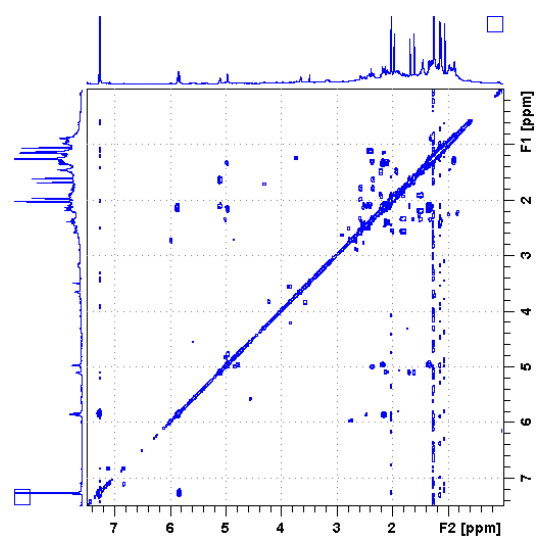

F

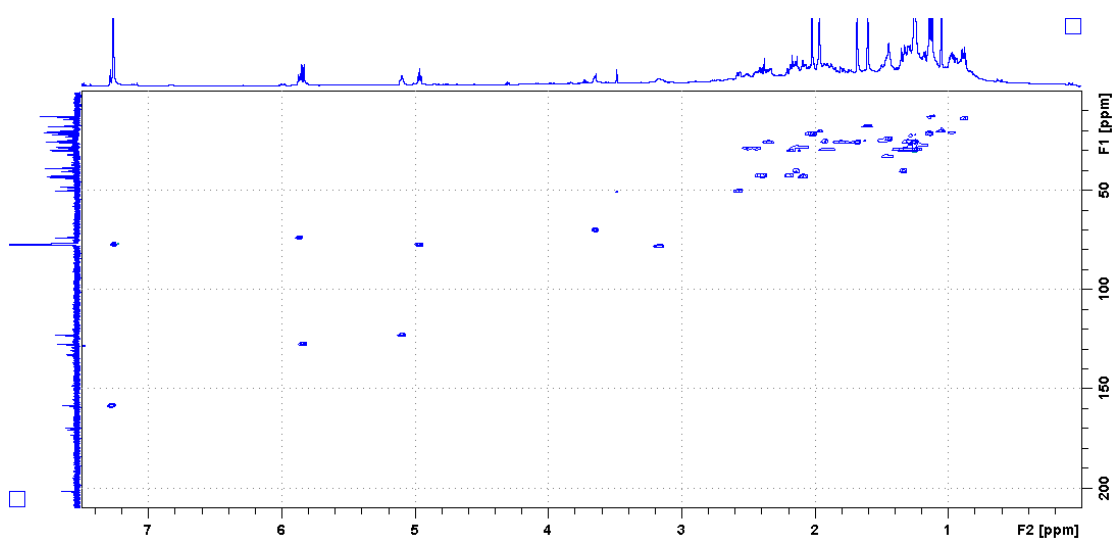

G

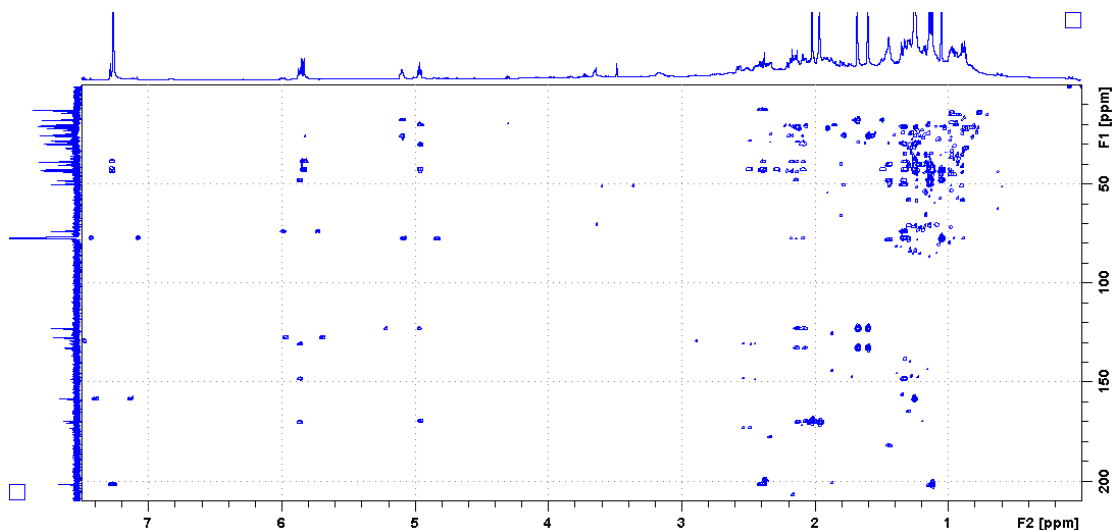

H

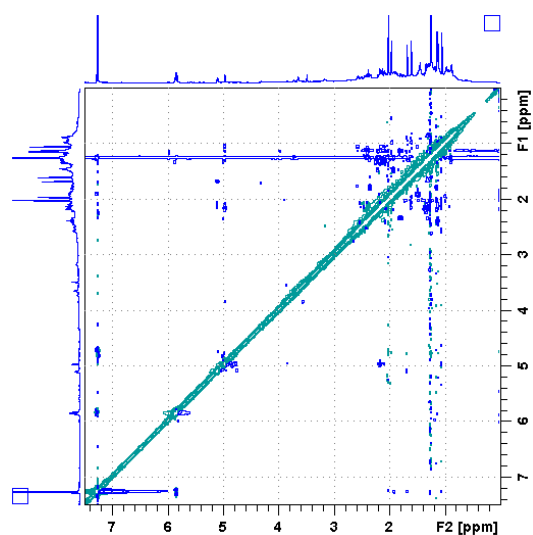

**Figure S39** HRESIMS and NMR spectra of **46**.

(A) HRESIMS spectrum; (B)  $^1\text{H}$  NMR spectrum in  $\text{CDCl}_3$  at 600 MHz; (C)  $^{13}\text{C}$  NMR spectrum in  $\text{CDCl}_3$  at 150 MHz; (D) DEPT 135 spectrum in  $\text{CDCl}_3$  at 150 MHz; (E)  $^1\text{H}$ - $^1\text{H}$  COSY spectrum in  $\text{CDCl}_3$  at 600 MHz; (F) HSQC spectrum in  $\text{CDCl}_3$  at 600 MHz; (G) HMBC spectrum in  $\text{CDCl}_3$  at 600 MHz; (H) NOESY spectrum in  $\text{CDCl}_3$  at 600 MHz.



A

Monoisotopic Mass, Even Electron Ions  
 313 formula(e) evaluated with 2 results within limits (up to 50 closest results for each mass)

Elements Used:

C: 0-500 H: 0-1000 O: 0-200 Na: 0-1

41

20190107\_45 191 (1.541)

1: TOF MS ES+  
 8.15e+004

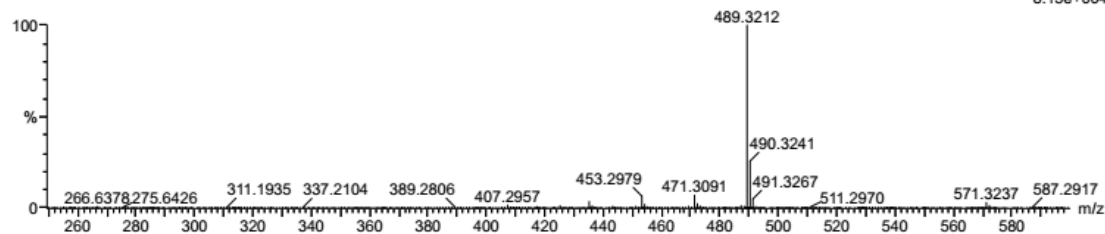

Minimum: -1.5  
 Maximum: 5.0 5.0 50.0

| Mass     | Calc. Mass | mDa  | PPM  | DBE  | i-FIT | Norm  | Conf (%) | Formula       |
|----------|------------|------|------|------|-------|-------|----------|---------------|
| 571.3237 | 571.3247   | -1.0 | -1.8 | 7.5  | 62.0  | 0.164 | 84.87    | C31 H48 O8 Na |
|          | 571.3212   | 2.5  | 4.4  | 19.5 | 63.8  | 1.888 | 15.13    | C40 H43 O3    |

B

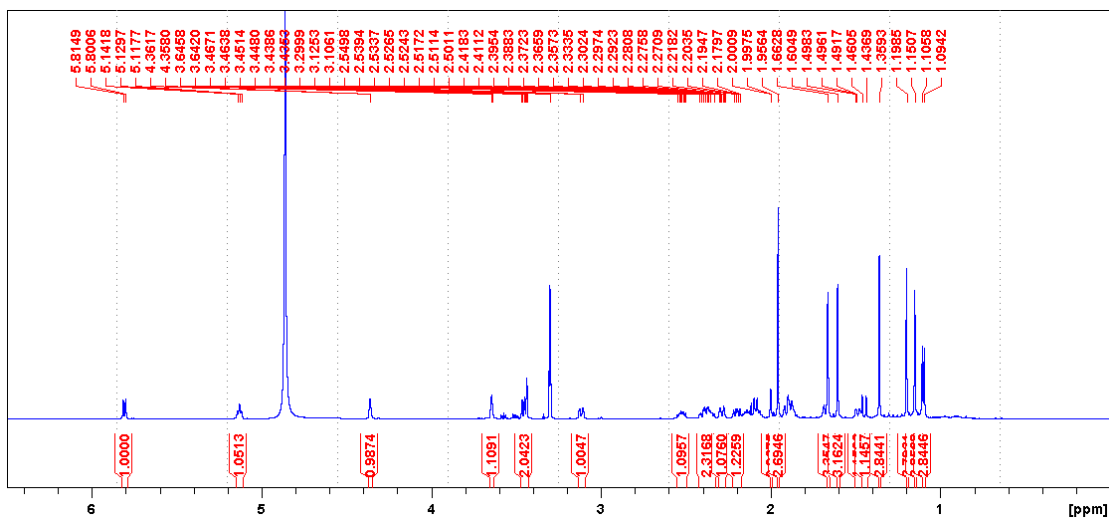

C

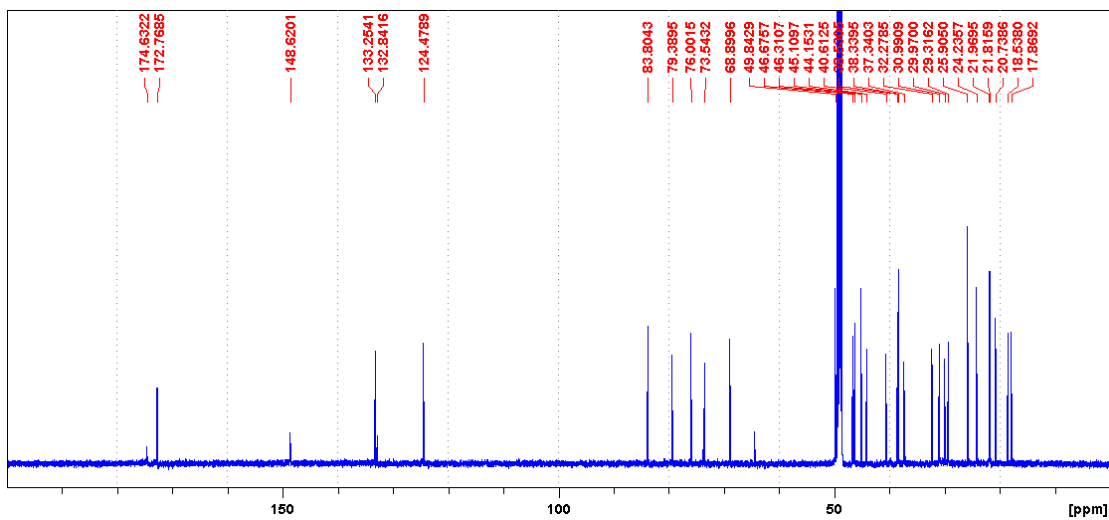

D

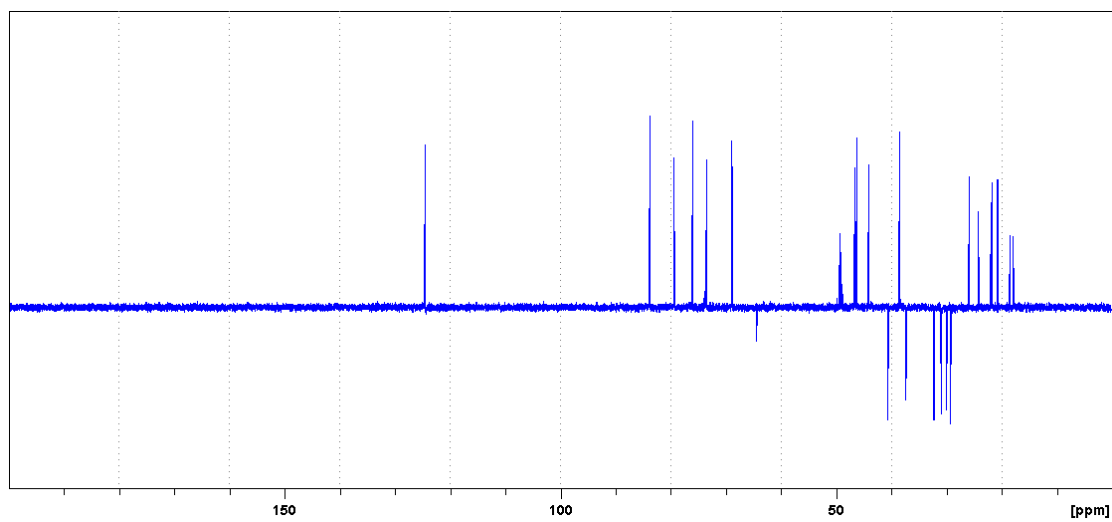

E

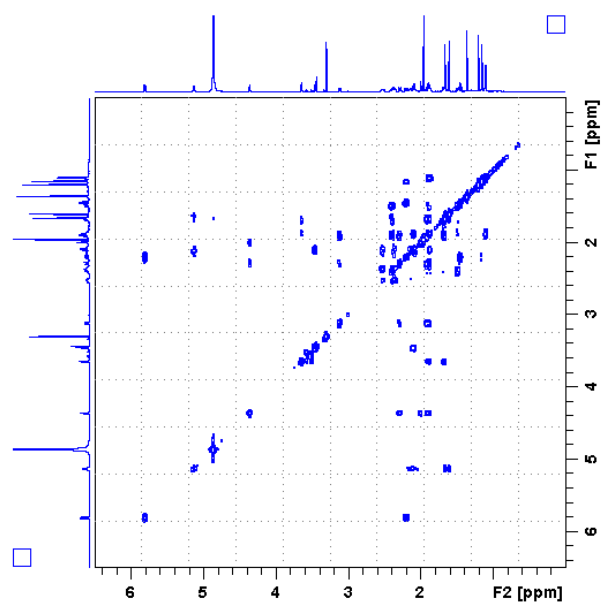

F

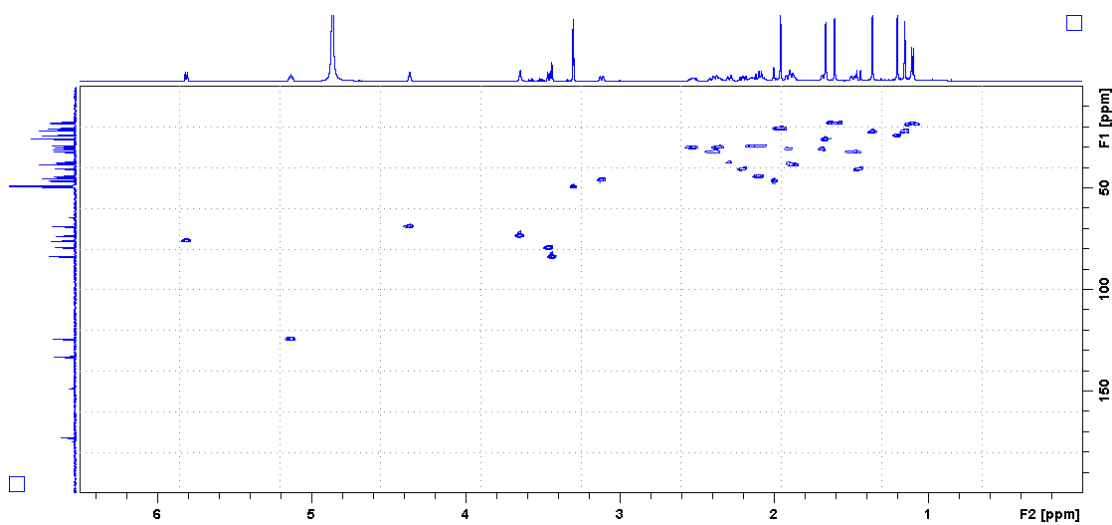

G

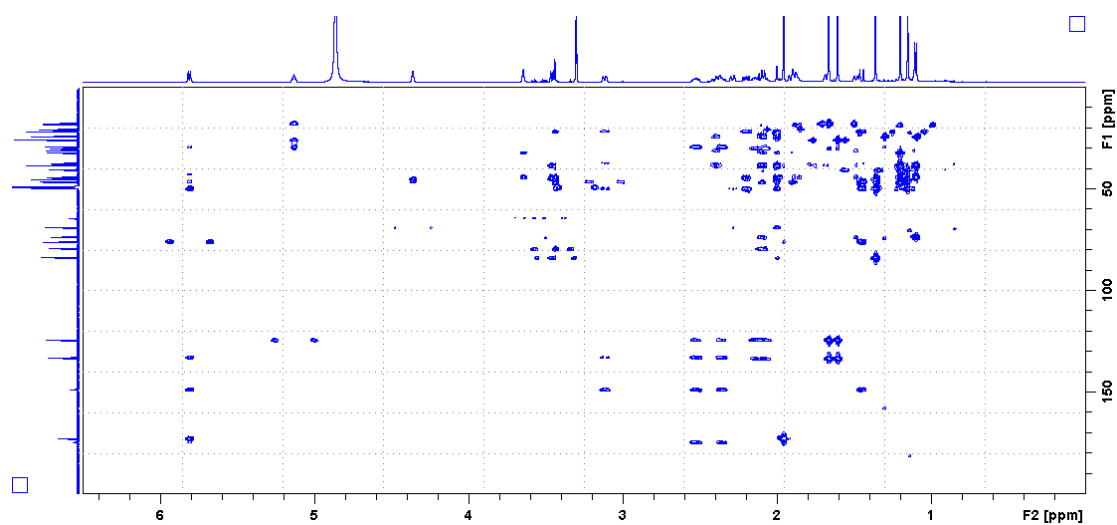

H

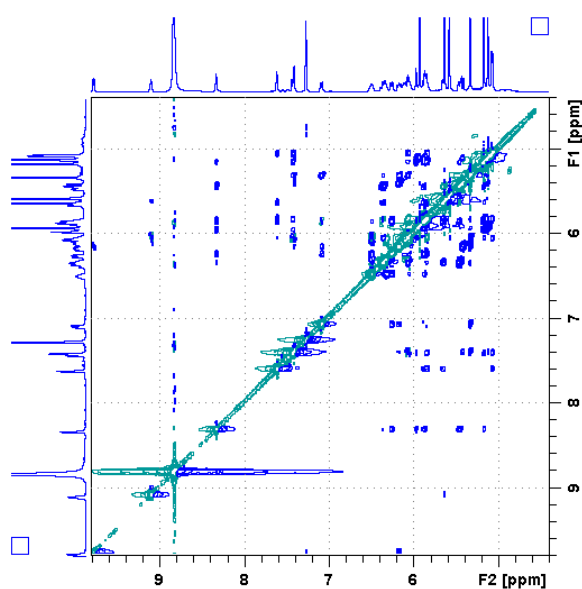

**Figure S40** HRESIMS and NMR spectra of **47**.

(A) HRESIMS spectrum; (B)  $^1\text{H}$  NMR spectrum in  $\text{CD}_3\text{OD}$  at 600 MHz; (C)  $^{13}\text{C}$  NMR spectrum in  $\text{CD}_3\text{OD}$  at 150 MHz; (D) DEPT 135 spectrum in  $\text{CD}_3\text{OD}$  at 150 MHz; (E)  $^1\text{H}$ - $^1\text{H}$  COSY spectrum in  $\text{CD}_3\text{OD}$  at 600 MHz; (F) HSQC spectrum in  $\text{CD}_3\text{OD}$  at 600 MHz; (G) HMBC spectrum in  $\text{CD}_3\text{OD}$  at 600 MHz; (H) ROESY spectrum in  $\text{CD}_3\text{OD}$  at 600 MHz.

A

Monoisotopic Mass, Even Electron Ions  
 267 formula(e) evaluated with 1 results within limits (up to 50 closest results for each mass)  
 Elements Used:  
 C: 0-500 H: 0-1000 O: 0-200 Na: 0-1  
 B1B4-C1-6-6  
 2018091036 204 (1.649)

1: TOF MS ES+  
 5.67e+005

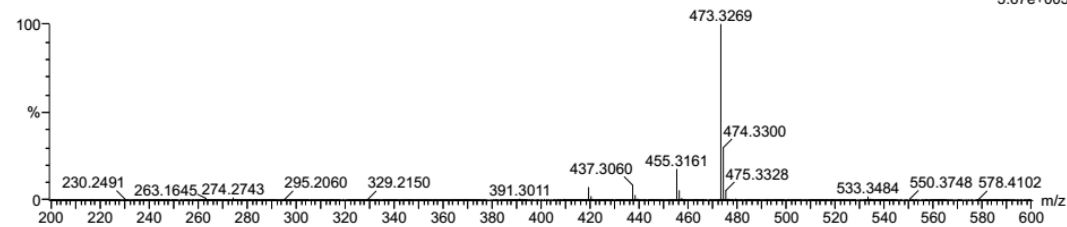

Minimum: -1.5  
 Maximum: 50.0

| Mass     | Calc. Mass | mDa | PPM | DBE | i-FIT | Norm | Conf (%) | Formula    |
|----------|------------|-----|-----|-----|-------|------|----------|------------|
| 533.3484 | 533.3478   | 0.6 | 1.1 | 7.5 | 334.5 | n/a  | n/a      | C31 H49 O7 |

B

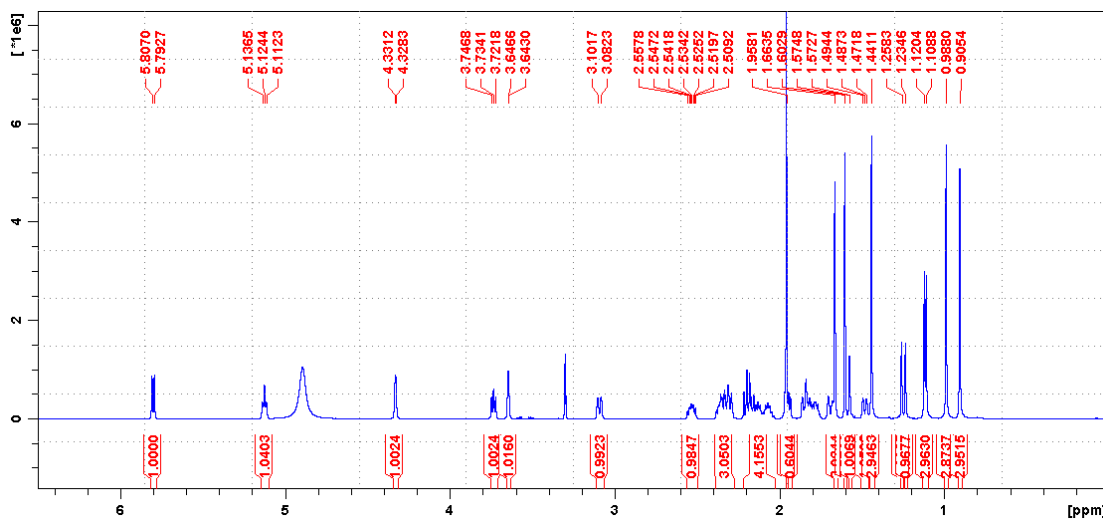

C

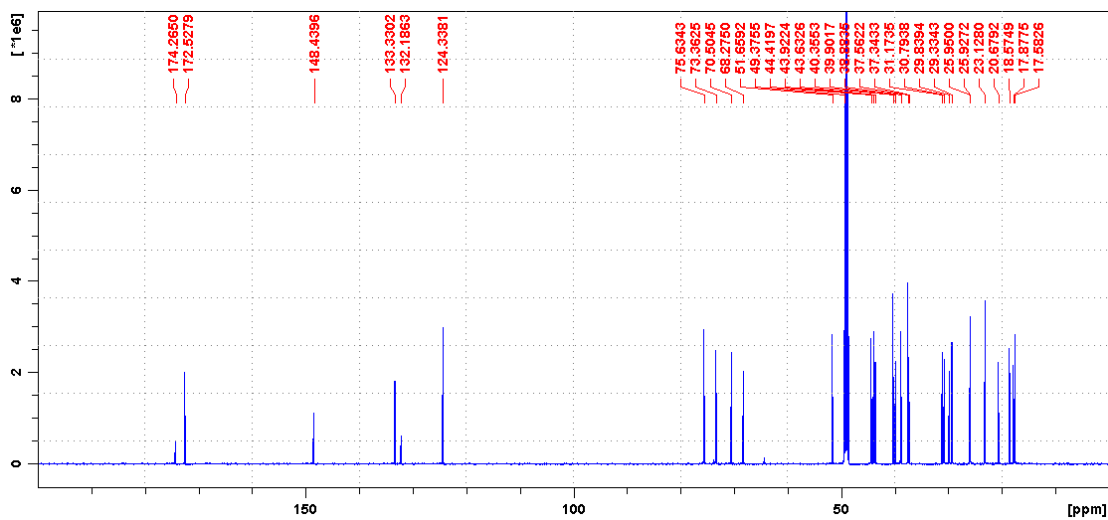

D

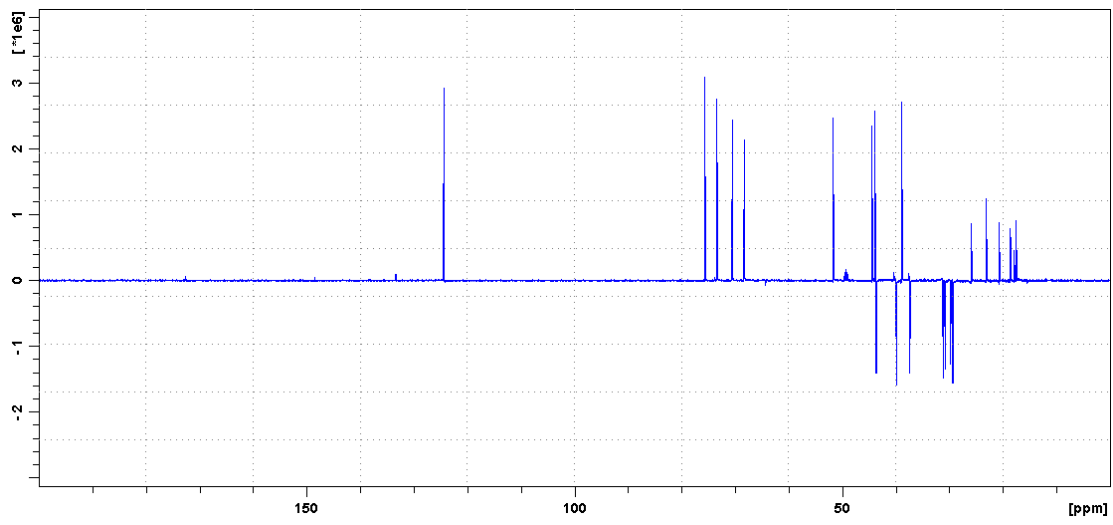

E

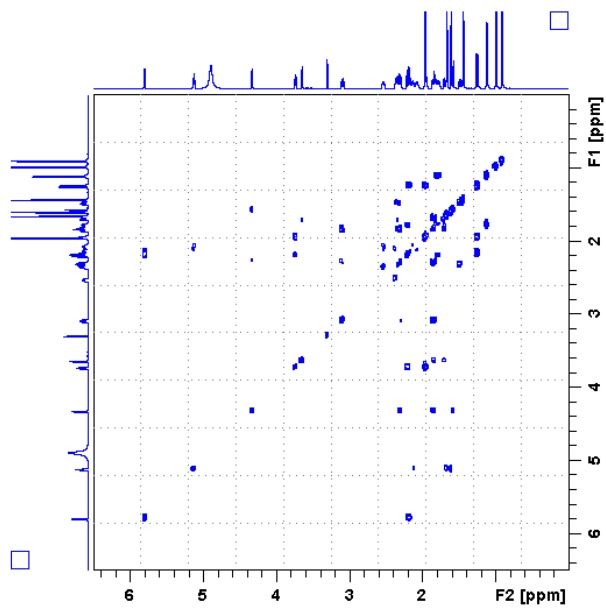

F

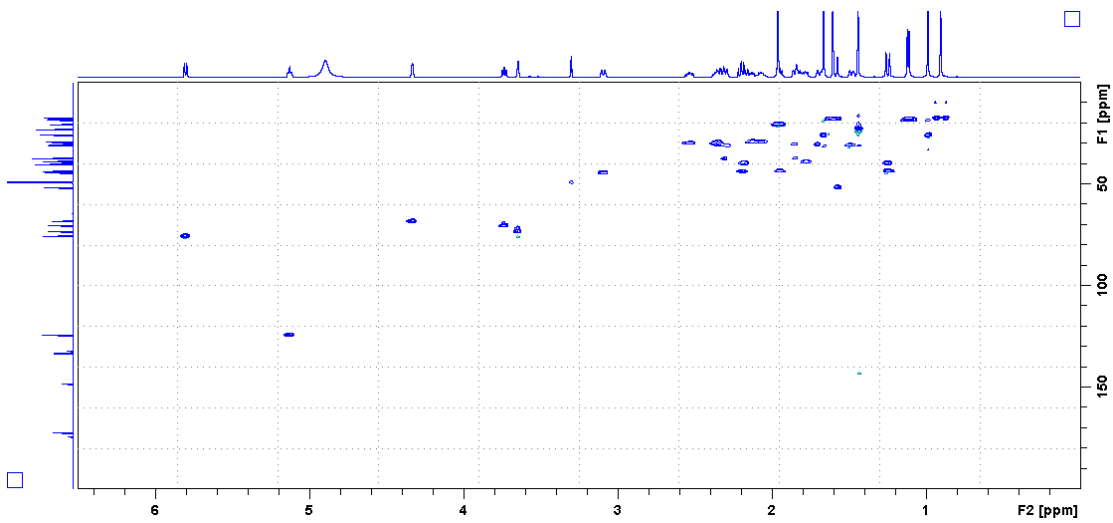

G

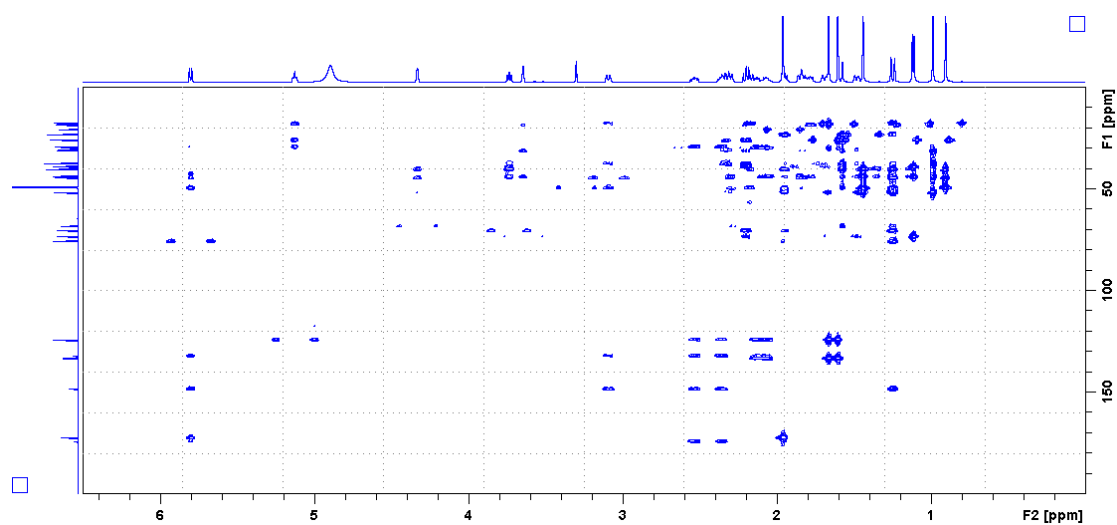

H

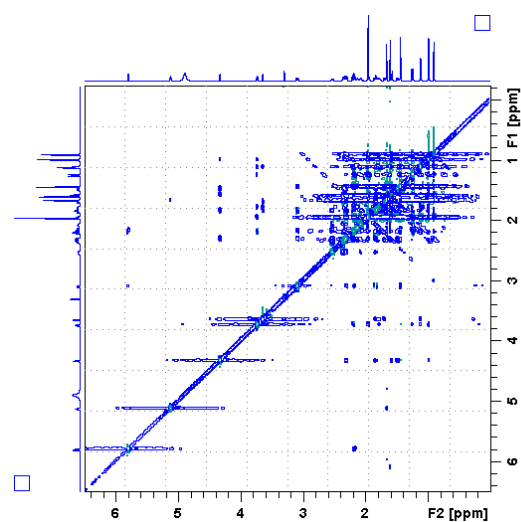

**Figure S41** HRESIMS and NMR spectra of **48**.

(A) HRESIMS spectrum; (B) <sup>1</sup>H NMR spectrum in CDCl<sub>3</sub> at 600 MHz; (C) <sup>13</sup>C NMR spectrum in CDCl<sub>3</sub> at 150 MHz; (D) DEPT 135 spectrum in CDCl<sub>3</sub> at 150 MHz; (E) <sup>1</sup>H–<sup>1</sup>H COSY spectrum in CDCl<sub>3</sub> at 600 MHz; (F) HSQC spectrum in CDCl<sub>3</sub> at 600 MHz; (G) HMBC spectrum in CDCl<sub>3</sub> at 600 MHz; (H) ROESY spectrum in CDCl<sub>3</sub> at 600 MHz.

**A**

Monoisotopic Mass, Even Electron Ions  
 267 formula(e) evaluated with 1 results within limits (up to 50 closest results for each mass)  
 Elements Used:  
 C: 0-500 H: 0-1000 O: 0-200 Na: 0-1  
 B1B4-C1-6-5  
 2018091043 206 (1.664)

1: TOF MS ES+  
 6.41e+005

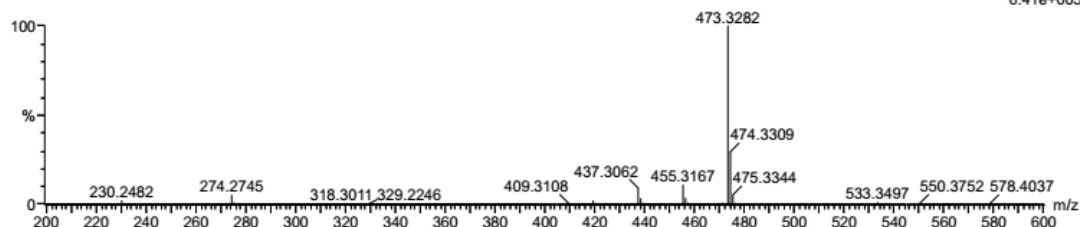

Minimum: -1.5  
 Maximum: 5.0 5.0 50.0

| Mass     | Calc. Mass | mDa | PPM | DBE | i-FIT | Norm | Conf (%) | Formula    |
|----------|------------|-----|-----|-----|-------|------|----------|------------|
| 533.3497 | 533.3478   | 1.9 | 3.6 | 7.5 | 195.9 | n/a  | n/a      | C31 H49 O7 |

**B**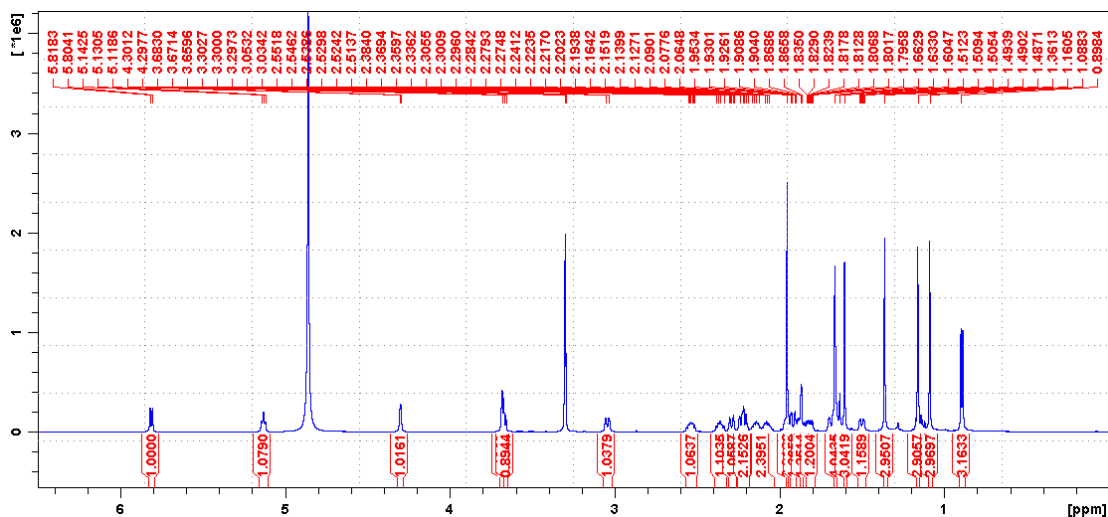**C**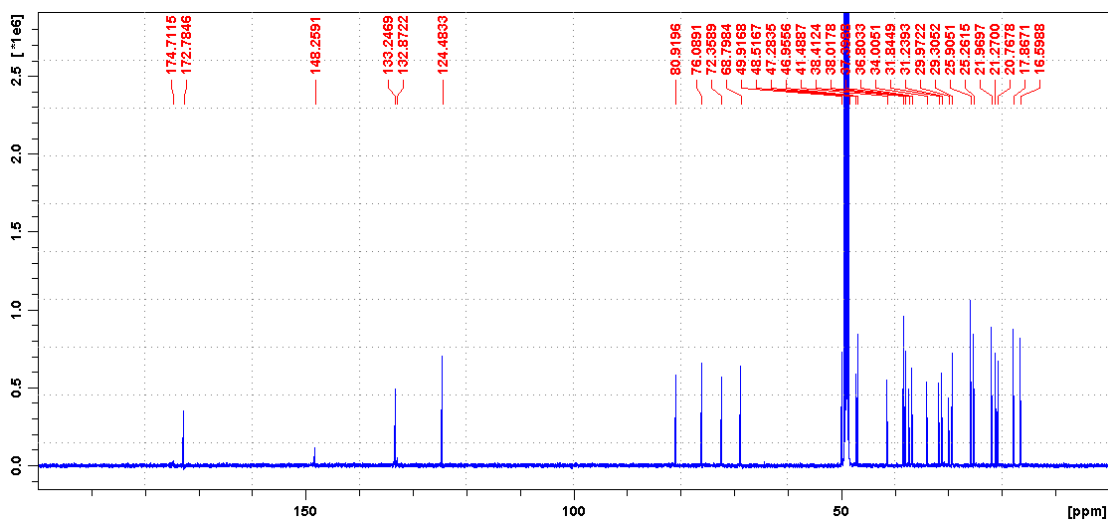

**D**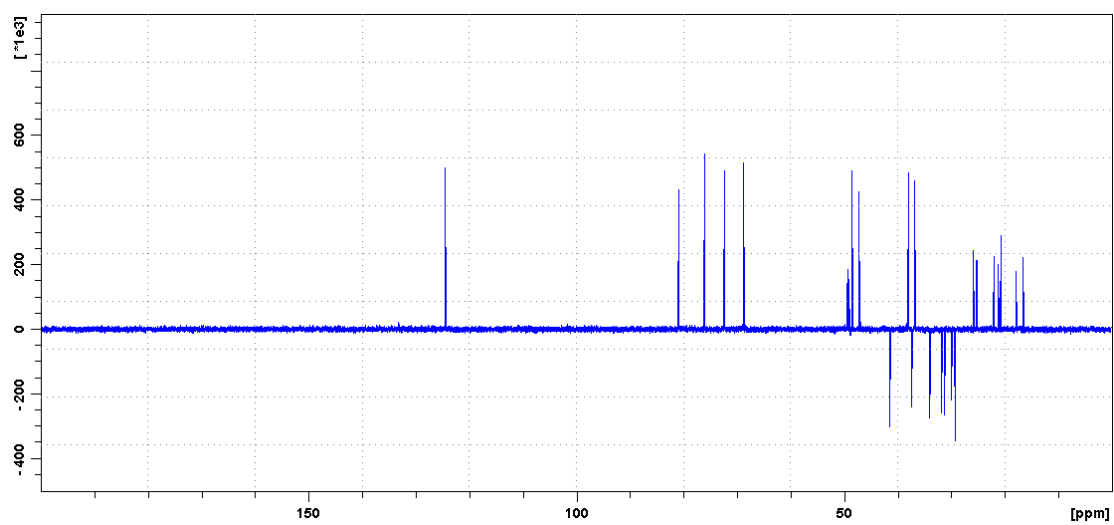**E**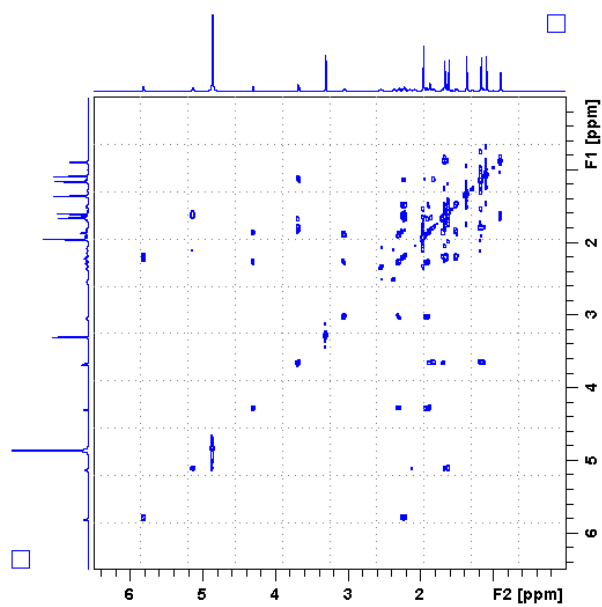**F**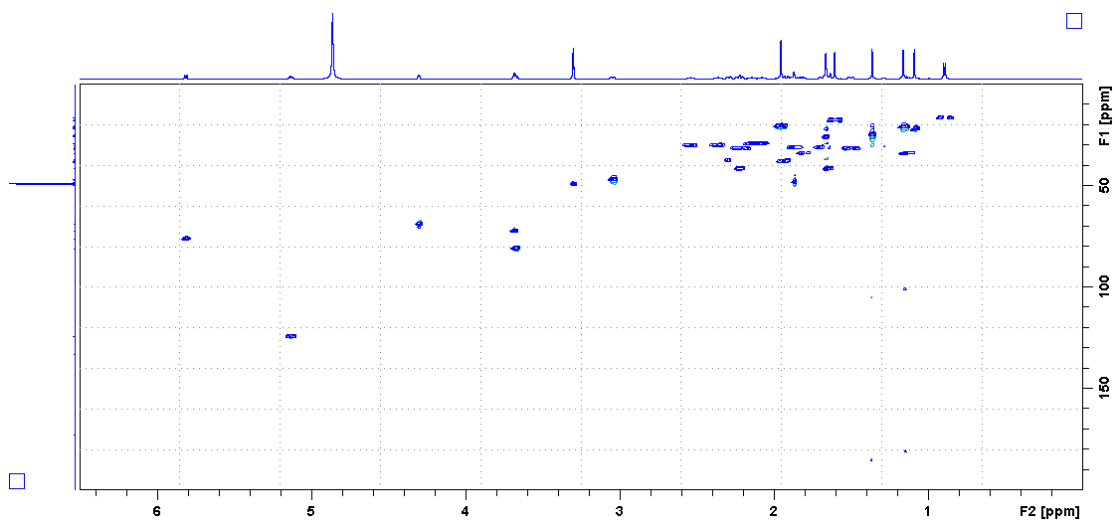



**G**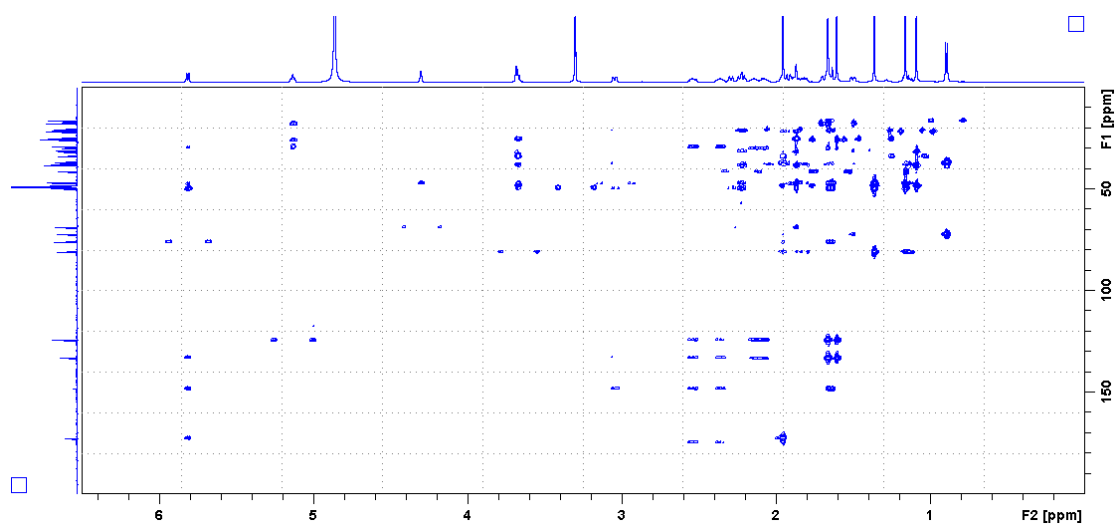**H**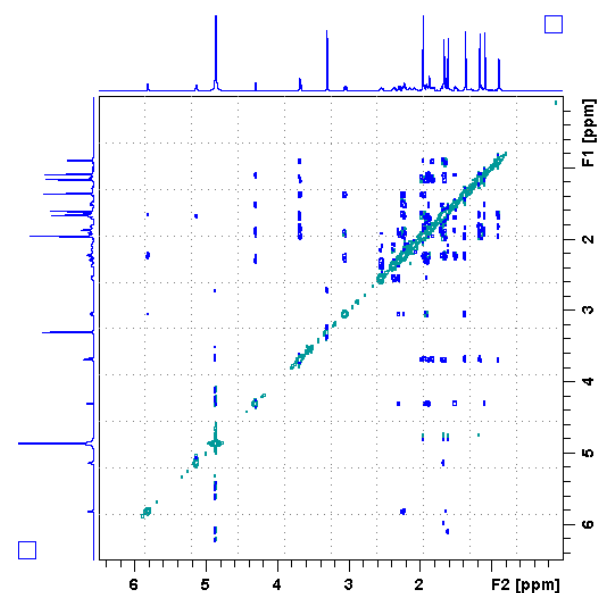

**Figure S42** HRESIMS and NMR spectra of **49**.

(A) HRESIMS spectrum; (B)  $^1\text{H}$  NMR spectrum in  $\text{CD}_3\text{OD}$  at 600 MHz; (C)  $^{13}\text{C}$  NMR spectrum in  $\text{CD}_3\text{OD}$  at 150 MHz; (D) DEPT 135 spectrum in  $\text{CD}_3\text{OD}$  at 150 MHz; (E)  $^1\text{H}$ - $^1\text{H}$  COSY spectrum in  $\text{CD}_3\text{OD}$  at 600 MHz; (F) HSQC spectrum in  $\text{CD}_3\text{OD}$  at 600 MHz; (G) HMBC spectrum in  $\text{CD}_3\text{OD}$  at 600 MHz; (H) ROESY spectrum in  $\text{CD}_3\text{OD}$  at 600 MHz.

A

Monoisotopic Mass, Even Electron Ions  
 353 formula(e) evaluated with 2 results within limits (up to 50 closest results for each mass)  
 Elements Used:

C: 0-500 H: 0-1000 O: 0-200 Na: 0-1

42  
 20190107\_47 209 (1.687)

1: TOF MS ES+  
 3.34e+04

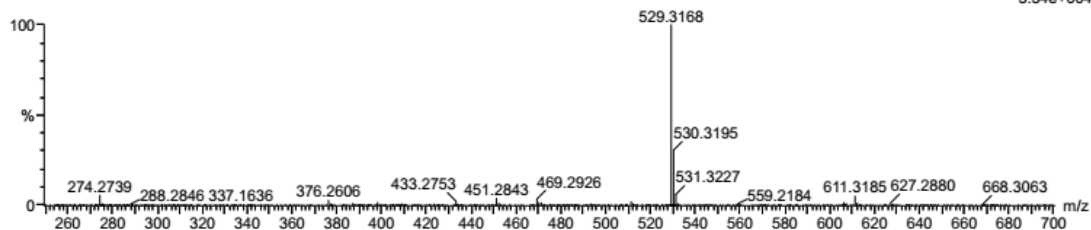

Minimum: -1.5  
 Maximum: 5.0 5.0 50.0

| Mass     | Calc. Mass | mDa  | PPM  | DBE  | i-FIT | Norm  | Conf (%) | Formula       |
|----------|------------|------|------|------|-------|-------|----------|---------------|
| 611.3185 | 611.3196   | -1.1 | -1.8 | 9.5  | 37.8  | 0.172 | 84.19    | C33 H48 O9 Na |
|          | 611.3161   | 2.4  | 3.9  | 21.5 | 39.4  | 1.845 | 15.81    | C42 H43 O4    |

B

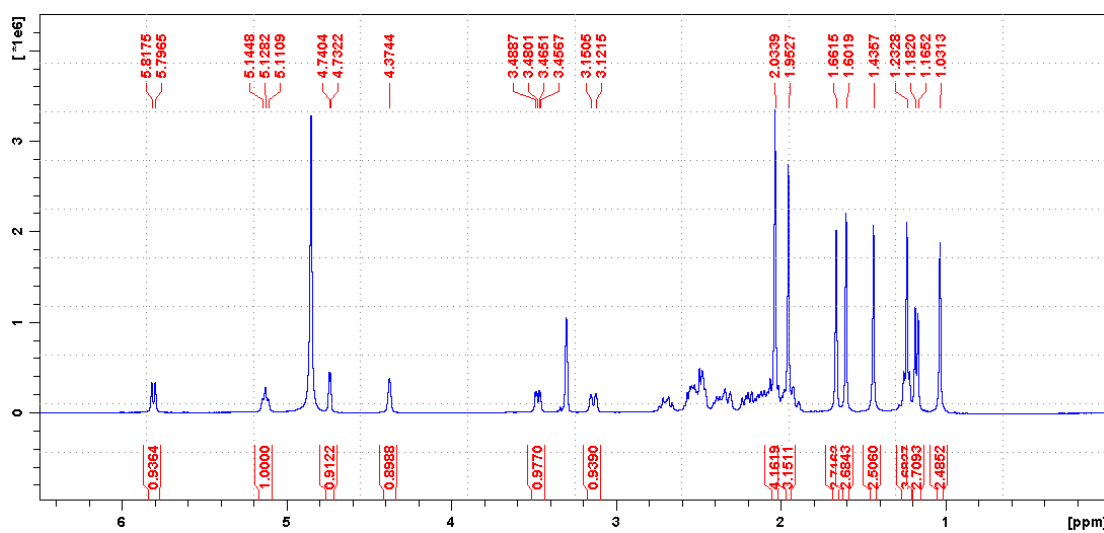

C

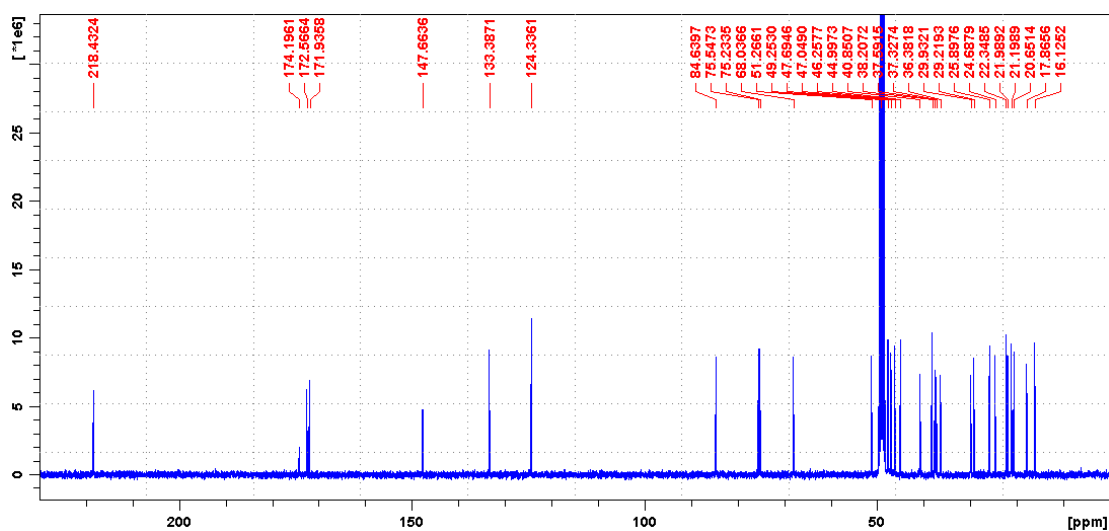

D

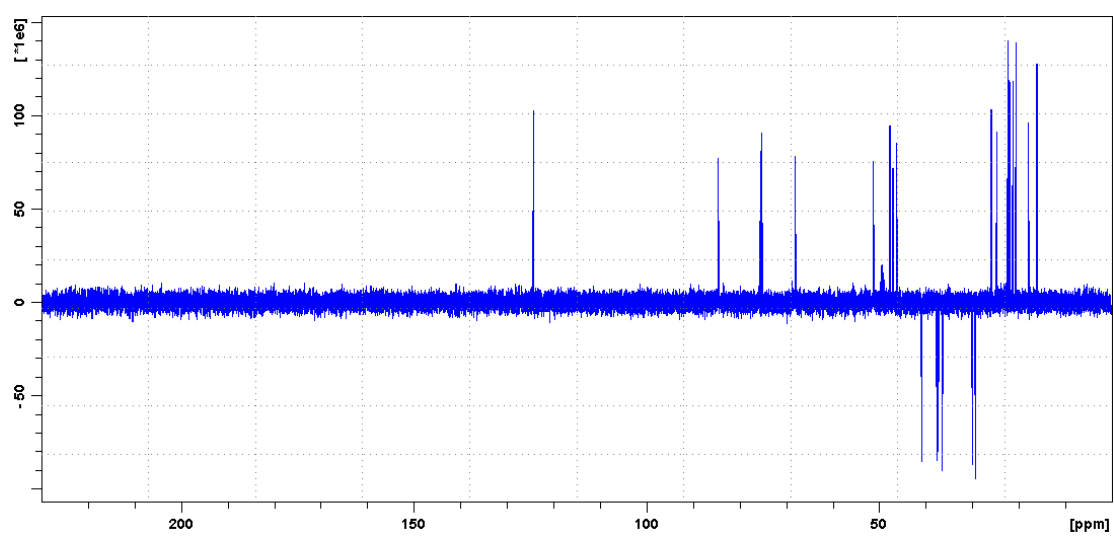

E

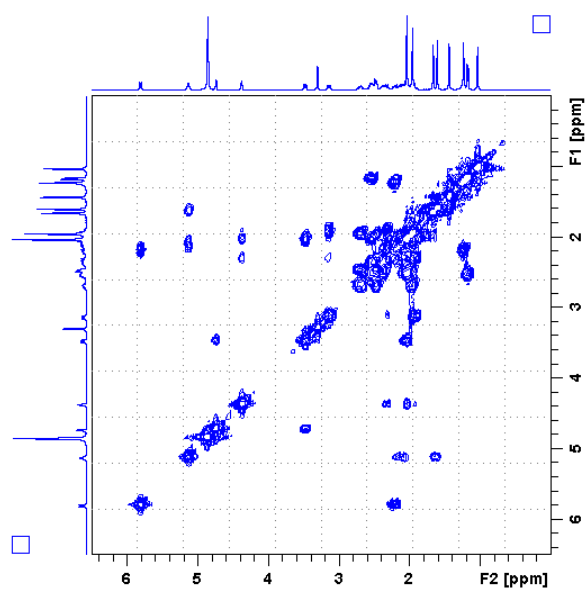

F

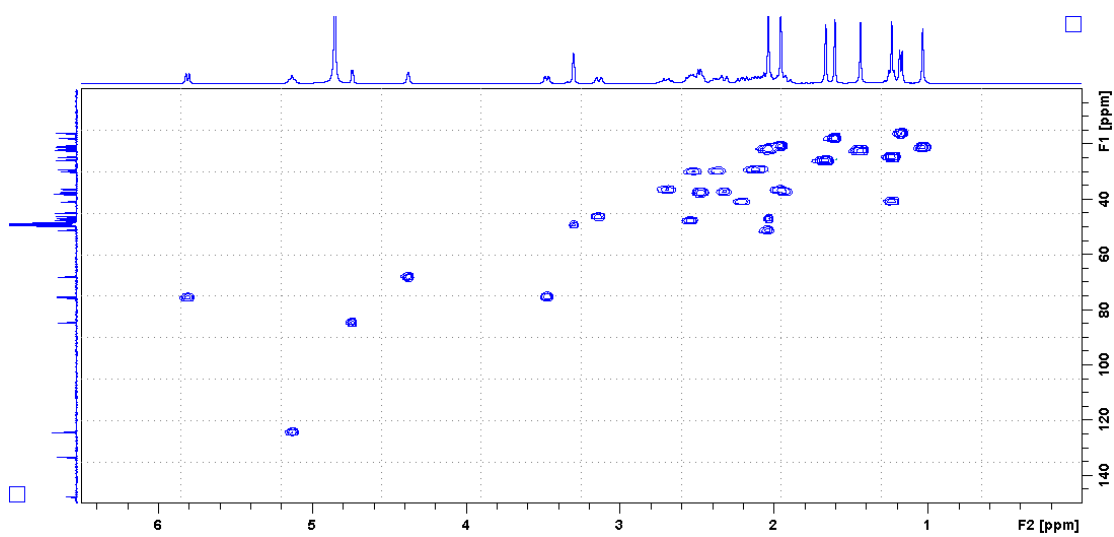

G

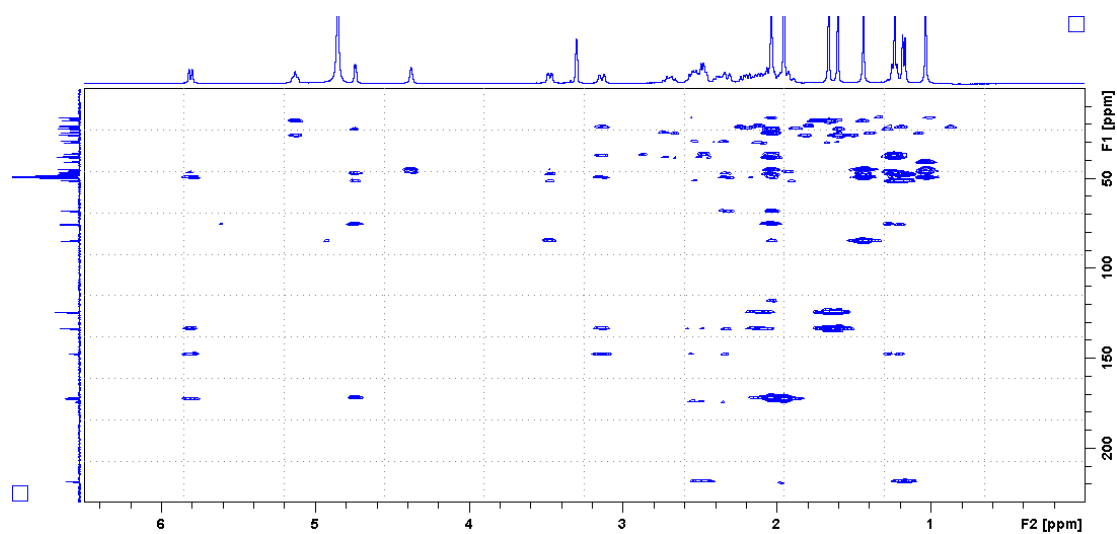

H

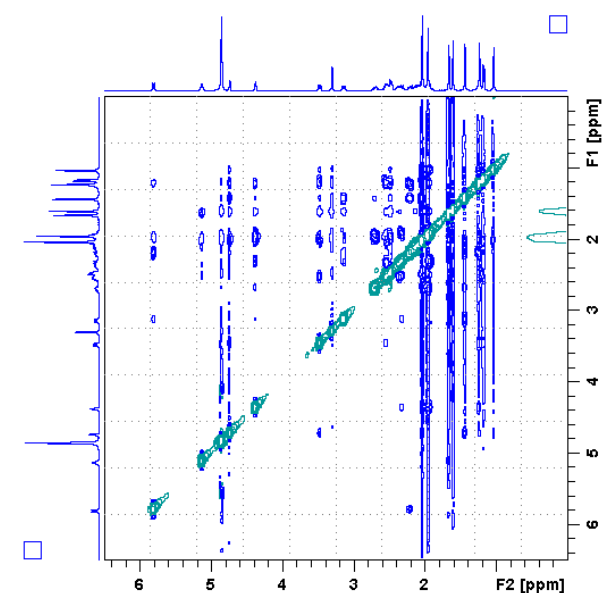

**Figure S43** HRESIMS and NMR spectra of **50**.

(A) HRESIMS spectrum; (B)  $^1\text{H}$  NMR spectrum in  $\text{CD}_3\text{OD}$  at 400 MHz; (C)  $^{13}\text{C}$  NMR spectrum in  $\text{CD}_3\text{OD}$  at 100 MHz; (D) DEPT 135 spectrum in  $\text{CD}_3\text{OD}$  at 100 MHz; (E)  $^1\text{H}$ - $^1\text{H}$  COSY spectrum in  $\text{CD}_3\text{OD}$  at 400 MHz; (F) HSQC spectrum in  $\text{CD}_3\text{OD}$  at 400 MHz; (G) HMBC spectrum in  $\text{CD}_3\text{OD}$  at 400 MHz; (H) ROESY spectrum in  $\text{CD}_3\text{OD}$  at 400 MHz.

A

Monoisotopic Mass, Even Electron Ions  
 353 formula(e) evaluated with 2 results within limits (up to 50 closest results for each mass)  
 Elements Used:  
 C: 0-500 H: 0-1000 O: 0-200 Na: 0-1  
 43  
 20190107\_48 202 (1.634)

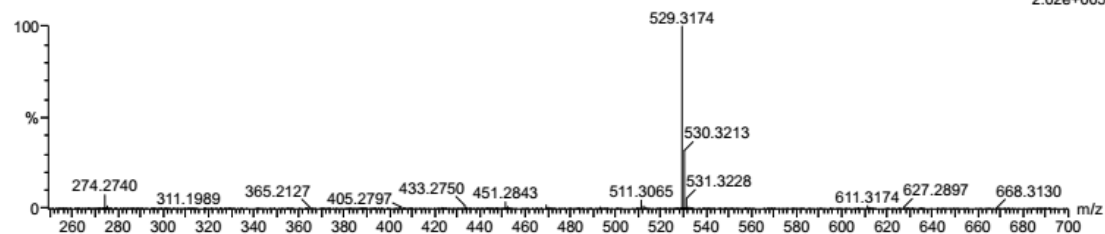

1: TOF MS ES+  
2.02e+005

Minimum: -1.5  
 Maximum: 5.0 5.0 50.0

| Mass     | Calc. Mass | mDa  | PPM  | DBE  | i-FIT | Norm  | Conf (%) | Formula       |
|----------|------------|------|------|------|-------|-------|----------|---------------|
| 611.3174 | 611.3196   | -2.2 | -3.6 | 9.5  | 80.1  | 0.020 | 98.06    | C33 H48 O9 Na |
|          | 611.3161   | 1.3  | 2.1  | 21.5 | 84.0  | 3.942 | 1.94     | C42 H43 O4    |

B

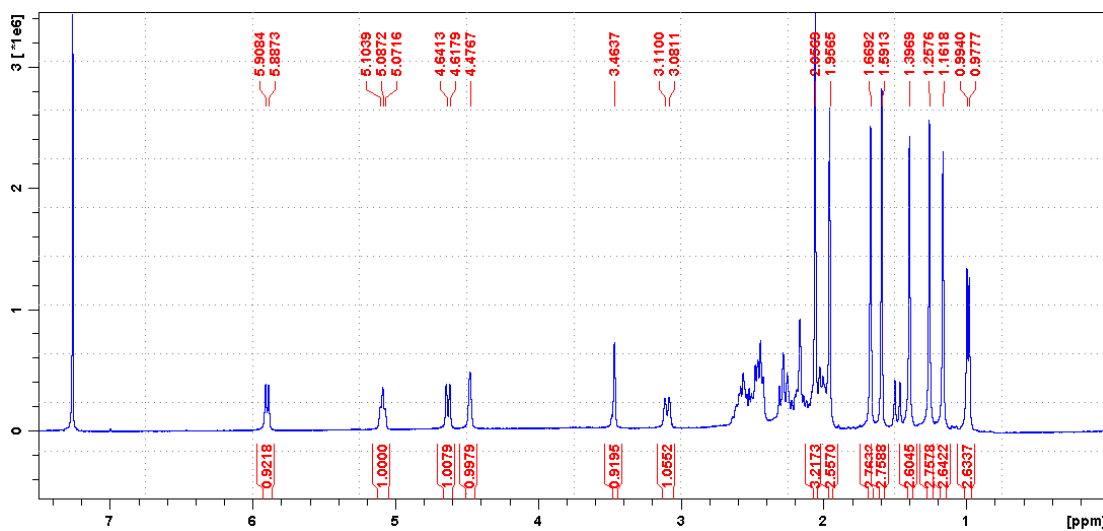

C

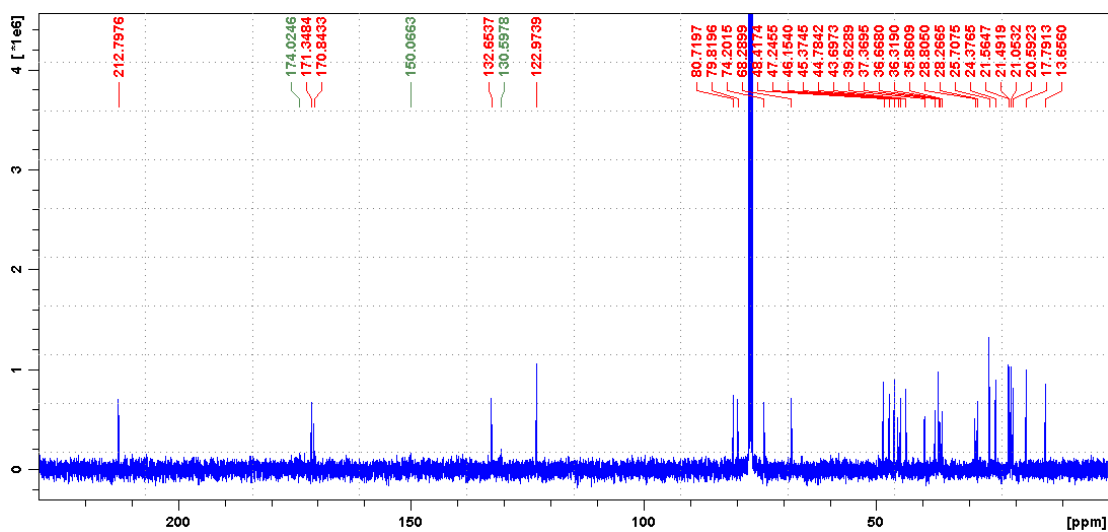

D

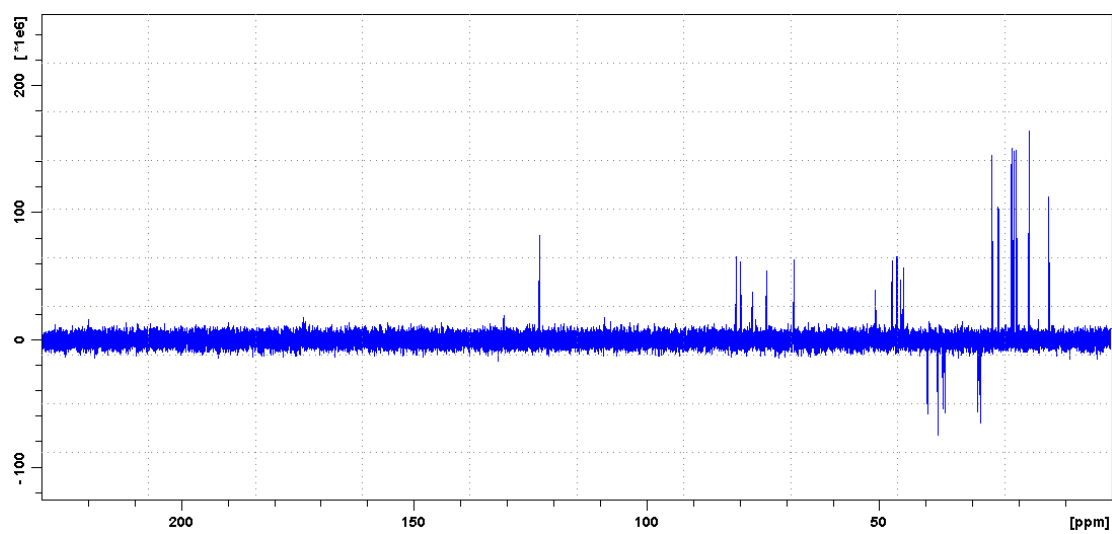

E

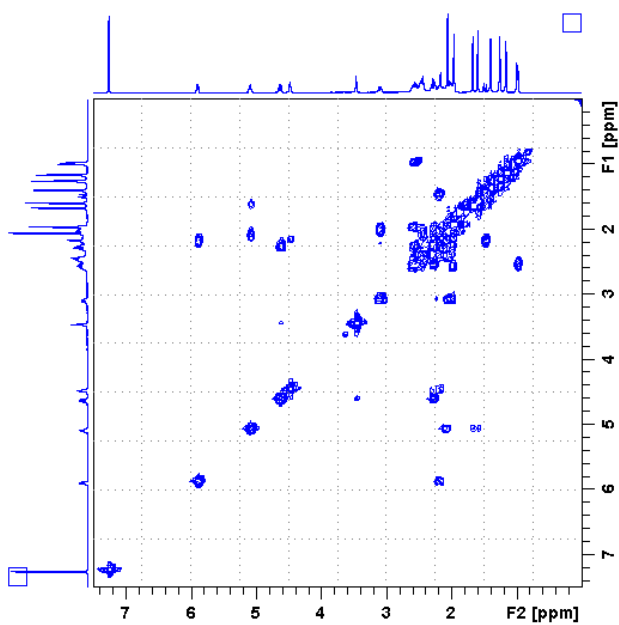

F

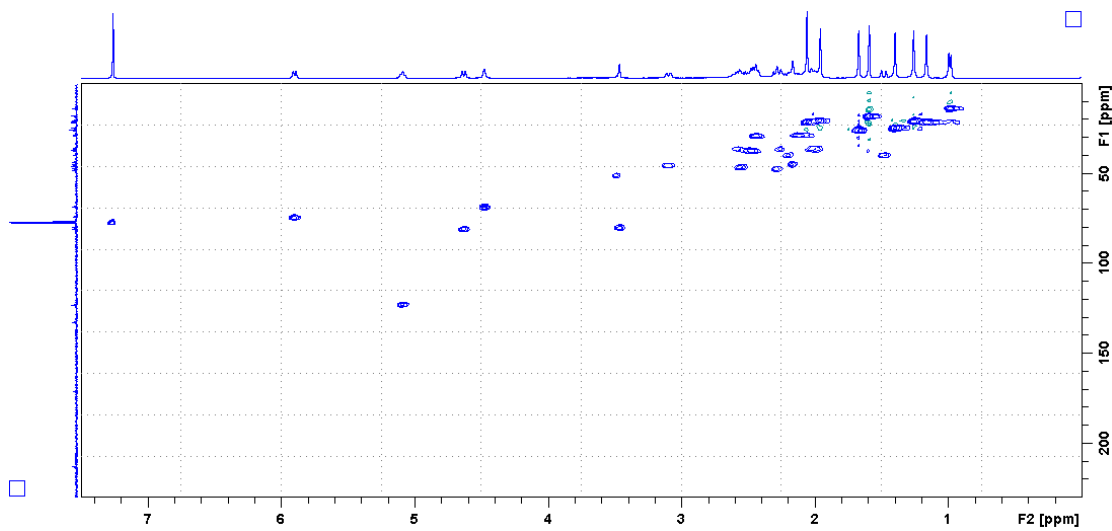

G

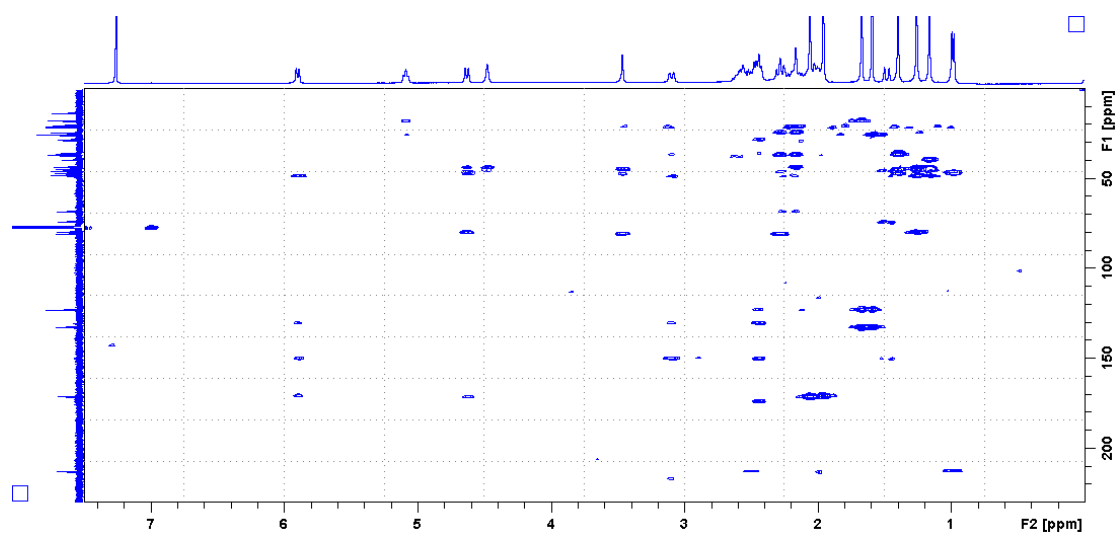

H

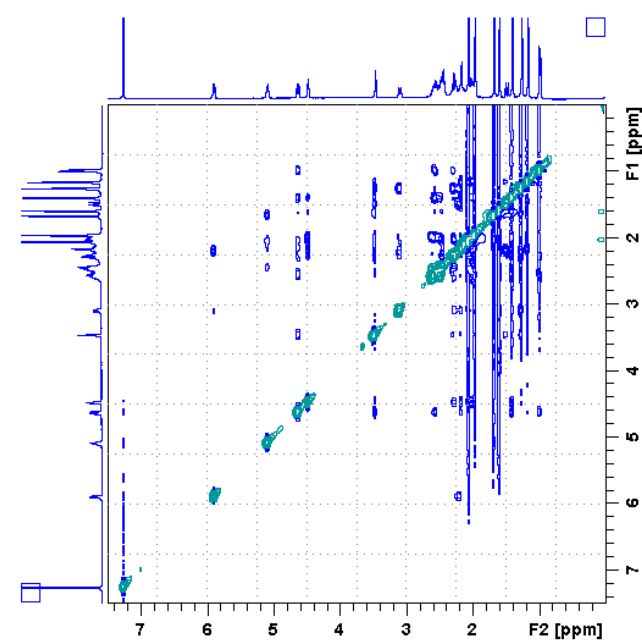

**Figure S44** HRESIMS and NMR spectra of **51**.

(A) HRESIMS spectrum; (B)  $^1\text{H}$  NMR spectrum in  $\text{CDCl}_3$  at 400 MHz; (C)  $^{13}\text{C}$  NMR spectrum in  $\text{CDCl}_3$  at 100 MHz; (D) DEPT 135 spectrum in  $\text{CDCl}_3$  at 100 MHz; (E)  $^1\text{H}$ - $^1\text{H}$  COSY spectrum in  $\text{CDCl}_3$  at 400 MHz; (F) HSQC spectrum in  $\text{CDCl}_3$  at 400 MHz; (G) HMBC spectrum in  $\text{CDCl}_3$  at 400 MHz; (H) ROESY spectrum in  $\text{CDCl}_3$  at 400 MHz.

A

Monoisotopic Mass, Even Electron Ions  
 336 formula(e) evaluated with 2 results within limits (up to 50 closest results for each mass)  
 Elements Used:  
 C: 0-500 H: 0-1000 O: 0-200 Na: 0-1  
 36  
 20190107\_40 223 (1.803)

1: TOF MS ES+  
 2.09e+004

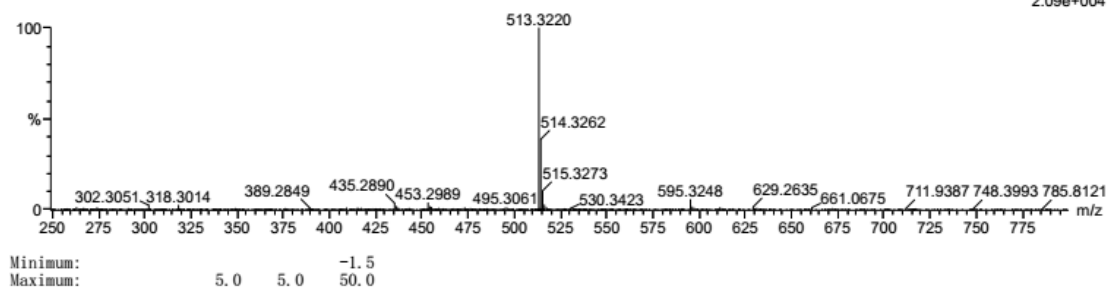

| Mass     | Calc. Mass | mDa  | PPM  | DBE  | i-FIT | Norm  | Conf (%) | Formula       |
|----------|------------|------|------|------|-------|-------|----------|---------------|
| 595.3248 | 595.3247   | 0.1  | 0.2  | 9.5  | 25.7  | 0.218 | 80.44    | C33 H48 O8 Na |
|          | 595.3271   | -2.3 | -3.9 | 12.5 | 27.1  | 1.632 | 19.56    | C35 H47 O8    |

B

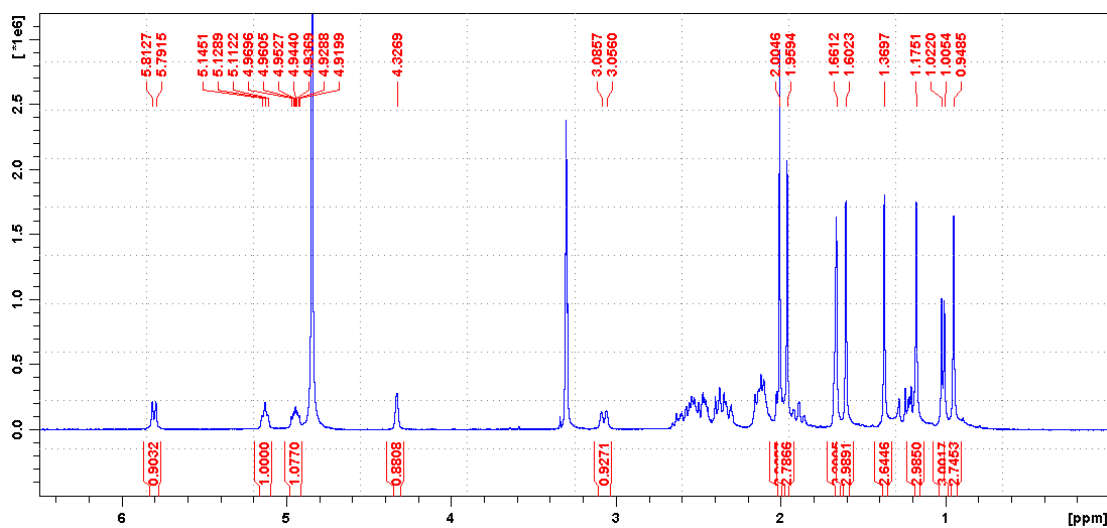

C

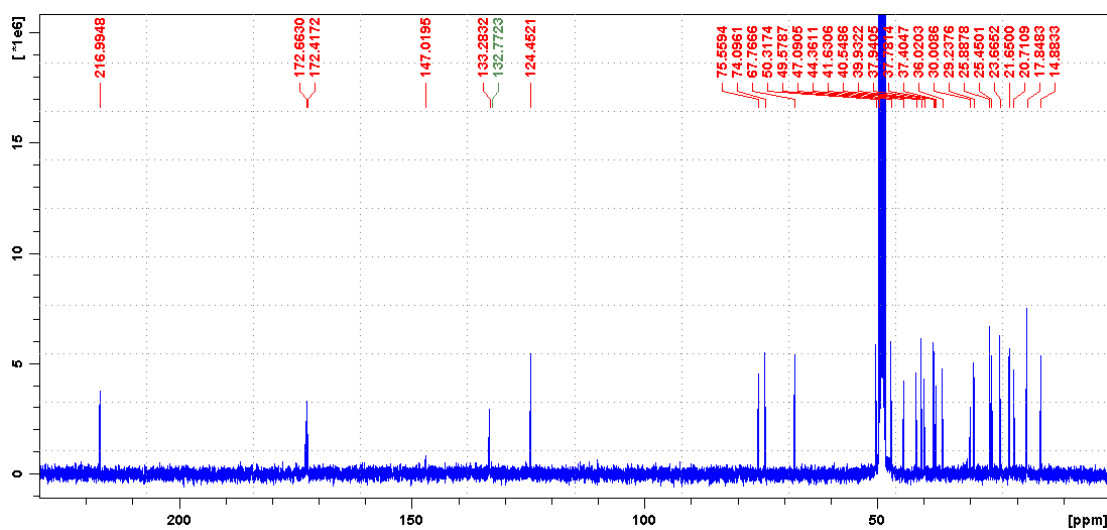



D

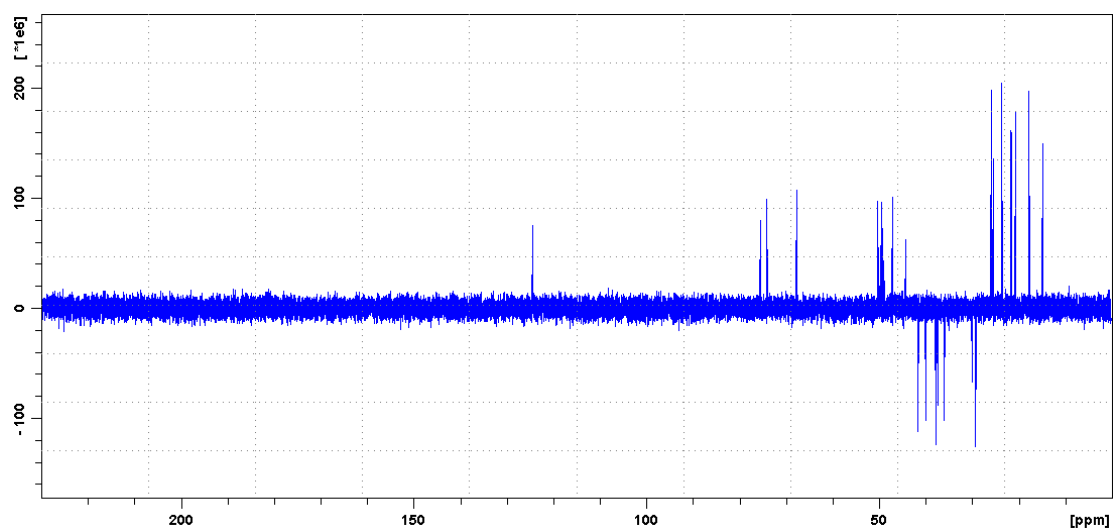

E

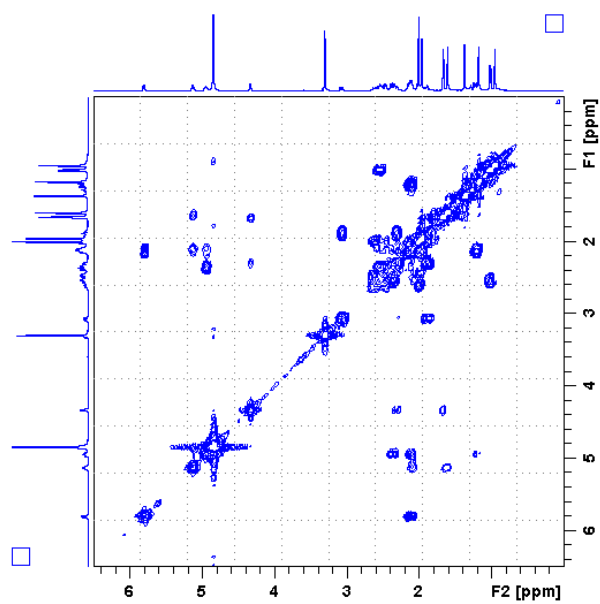

F

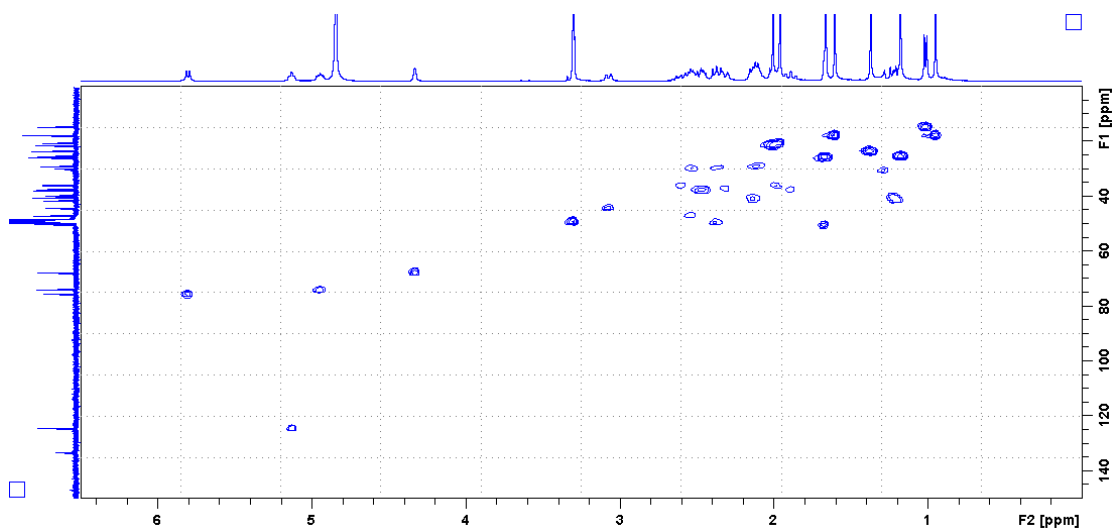

G

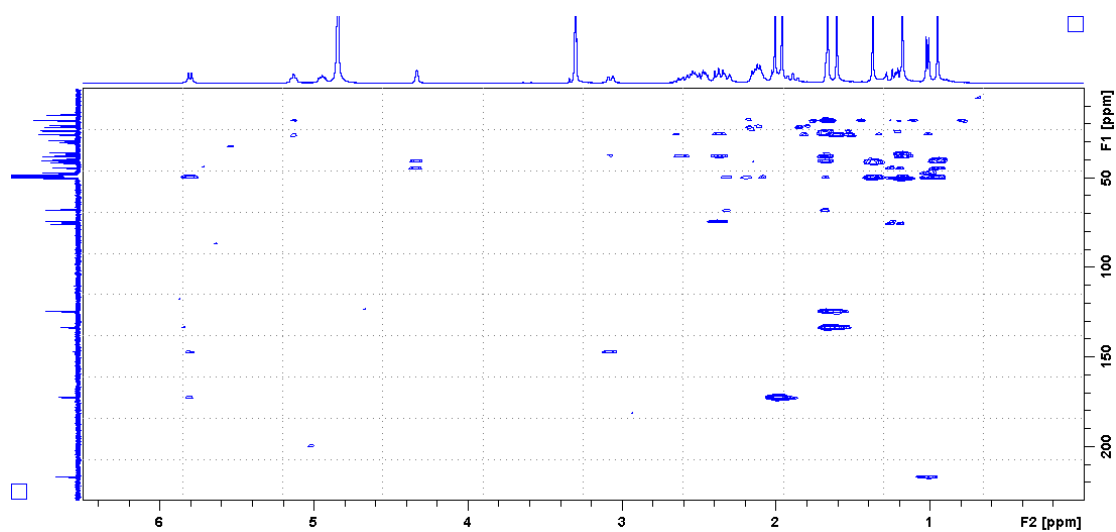

H

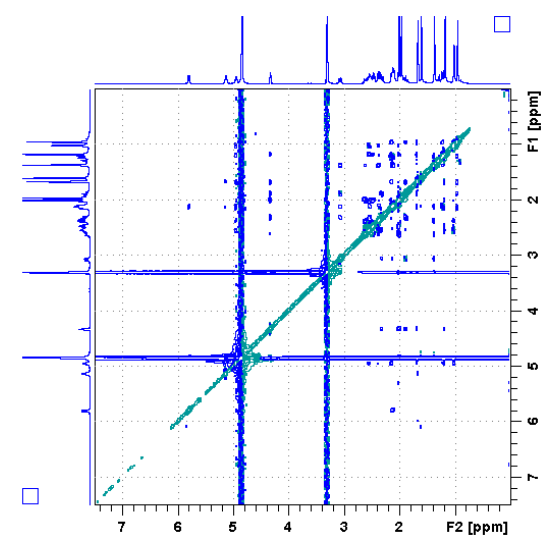

**Figure S45** HRESIMS and NMR spectra of **52**.

(A) HRESIMS spectrum; (B)  $^1\text{H}$  NMR spectrum in  $\text{CD}_3\text{OD}$  at 400 MHz; (C)  $^{13}\text{C}$  NMR spectrum in  $\text{CD}_3\text{OD}$  at 100 MHz; (D) DEPT 135 spectrum in  $\text{CD}_3\text{OD}$  at 100 MHz; (E)  $^1\text{H}$ - $^1\text{H}$  COSY spectrum in  $\text{CD}_3\text{OD}$  at 400 MHz; (F) HSQC spectrum in  $\text{CD}_3\text{OD}$  at 400 MHz; (G) HMBC spectrum in  $\text{CD}_3\text{OD}$  at 400 MHz; (H) ROESY spectrum in  $\text{CD}_3\text{OD}$  at 600 MHz.

A

Monoisotopic Mass, Even Electron Ions  
 300 formula(e) evaluated with 2 results within limits (up to 50 closest results for each mass)  
 Elements Used:  
 C: 0-500 H: 0-1000 O: 0-200 Na: 0-1  
 37  
 20190107\_41 188 (1.518)

1: TOF MS ES+  
 1.25e+005

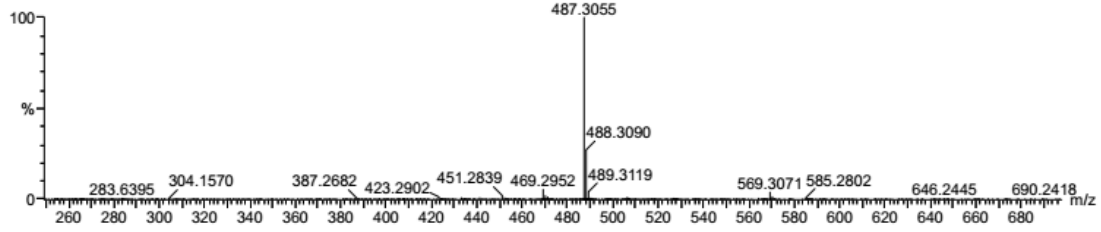

Minimum: -1.5  
 Maximum: 5.0 5.0 50.0

| Mass     | Calc. Mass | mDa  | PPM  | DBE  | i-FIT | Norm  | Conf (%) | Formula       |
|----------|------------|------|------|------|-------|-------|----------|---------------|
| 569.3071 | 569.3056   | 1.5  | 2.6  | 20.5 | 76.8  | 3.337 | 3.55     | C40 H41 O3    |
|          | 569.3090   | -1.9 | -3.3 | 8.5  | 73.5  | 0.036 | 96.45    | C31 H46 O8 Na |

B

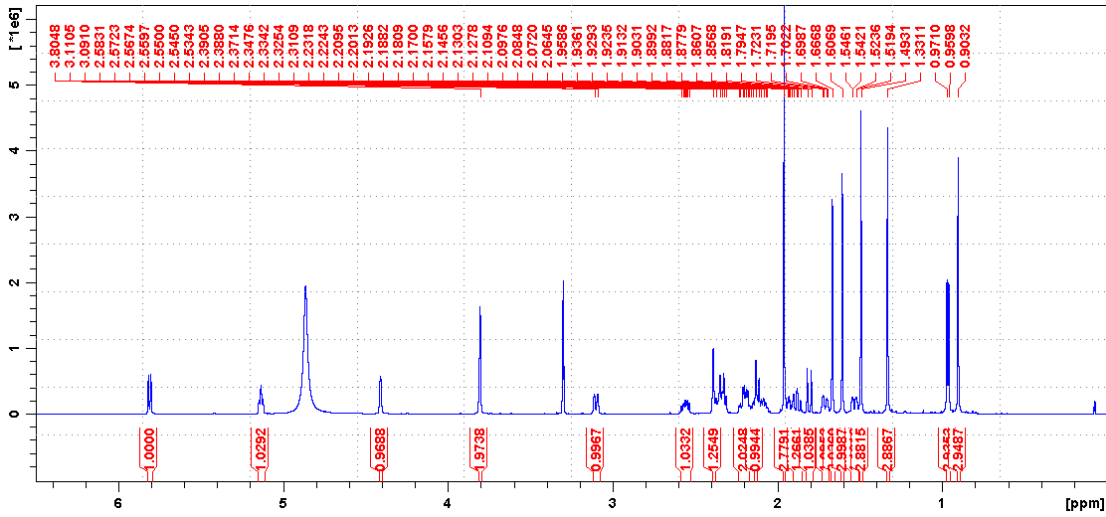

C

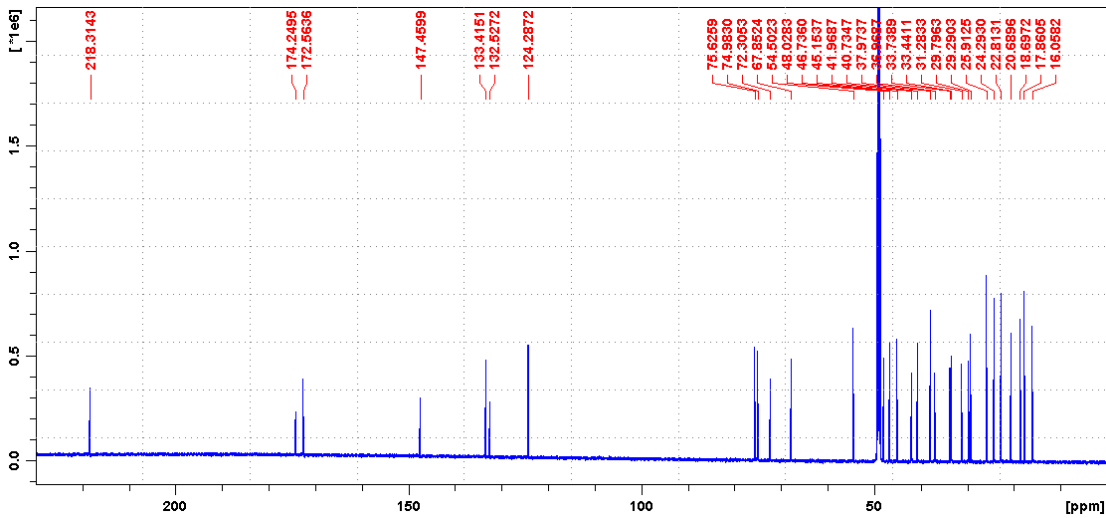

D

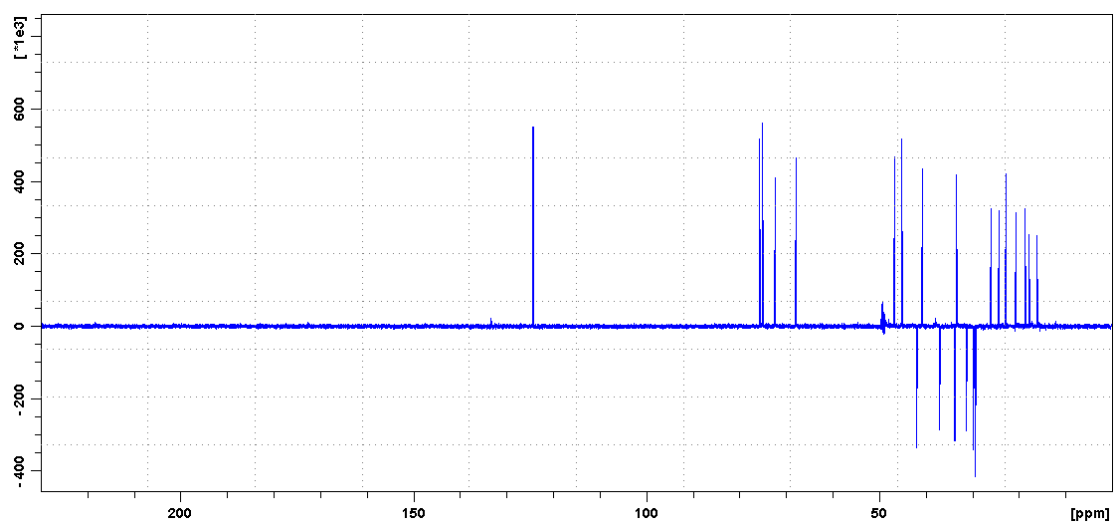

E

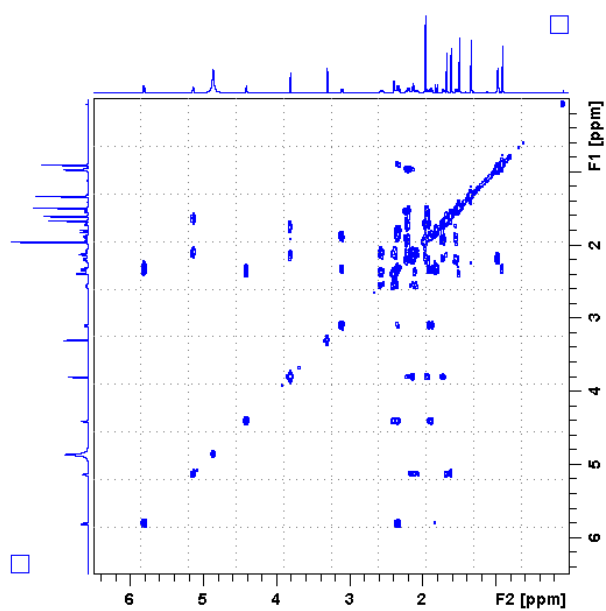

F

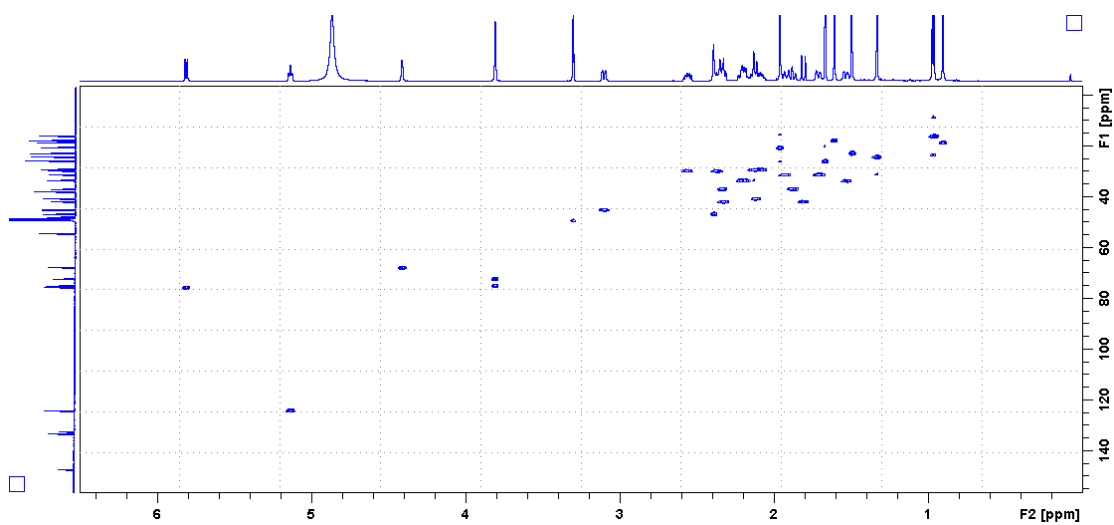

G

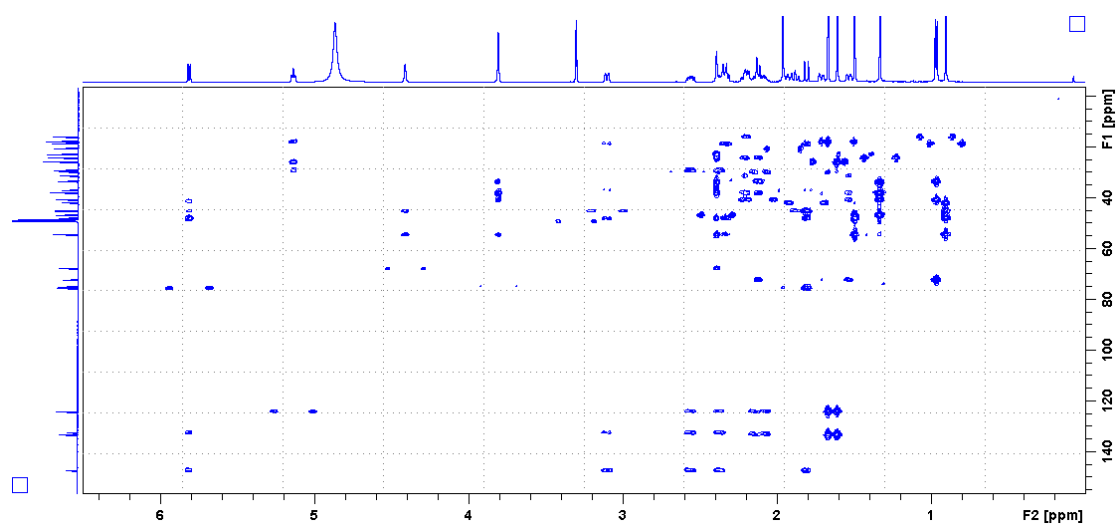

H

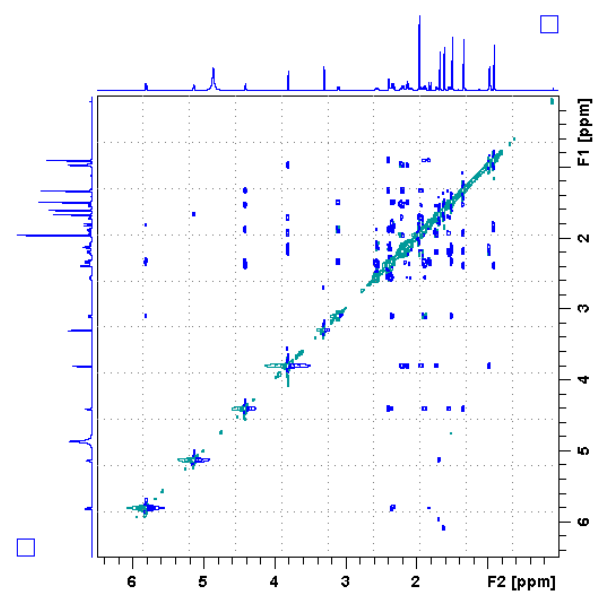

**Figure S46** HRESIMS and NMR spectra of **55**.

(A) HRESIMS spectrum; (B)  $^1\text{H}$  NMR spectrum in  $\text{CD}_3\text{OD}$  at 600 MHz; (C)  $^{13}\text{C}$  NMR spectrum in  $\text{CD}_3\text{OD}$  at 150 MHz; (D) DEPT 135 spectrum in  $\text{CD}_3\text{OD}$  at 150 MHz; (E)  $^1\text{H}$ - $^1\text{H}$  COSY spectrum in  $\text{CD}_3\text{OD}$  at 600 MHz; (F) HSQC spectrum in  $\text{CD}_3\text{OD}$  at 600 MHz; (G) HMBC spectrum in  $\text{CD}_3\text{OD}$  at 600 MHz; (H) ROESY spectrum in  $\text{CD}_3\text{OD}$  at 600 MHz.

A

Monoisotopic Mass, Even Electron Ions  
 267 formula(e) evaluated with 1 results within limits (up to 50 closest results for each mass)  
 Elements Used:  
 C: 0-500 H: 0-200 O: 0-200 Na: 0-1  
 B3B1-C1-2-4  
 2018091047 200 (1.619)

1: TOF MS ES+  
 7.02e+005

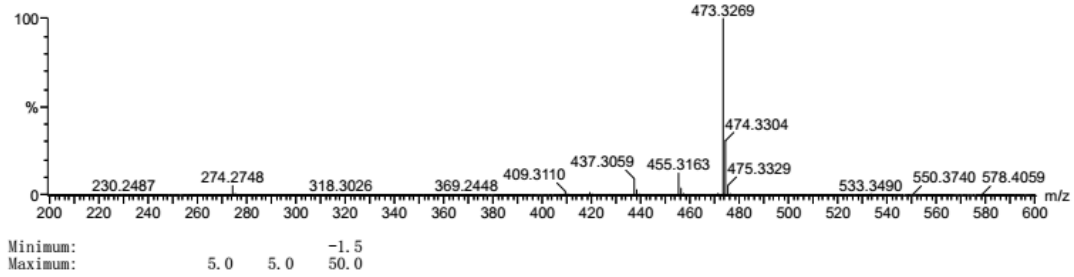

Minimum: -1.5  
 Maximum: 50.0

| Mass     | Calc. Mass | mDa | PPM | DBE | i-FIT | Norm | Conf (%) | Formula    |
|----------|------------|-----|-----|-----|-------|------|----------|------------|
| 533.3490 | 533.3478   | 1.2 | 2.2 | 7.5 | 312.1 | n/a  | n/a      | C31 H49 O7 |

B

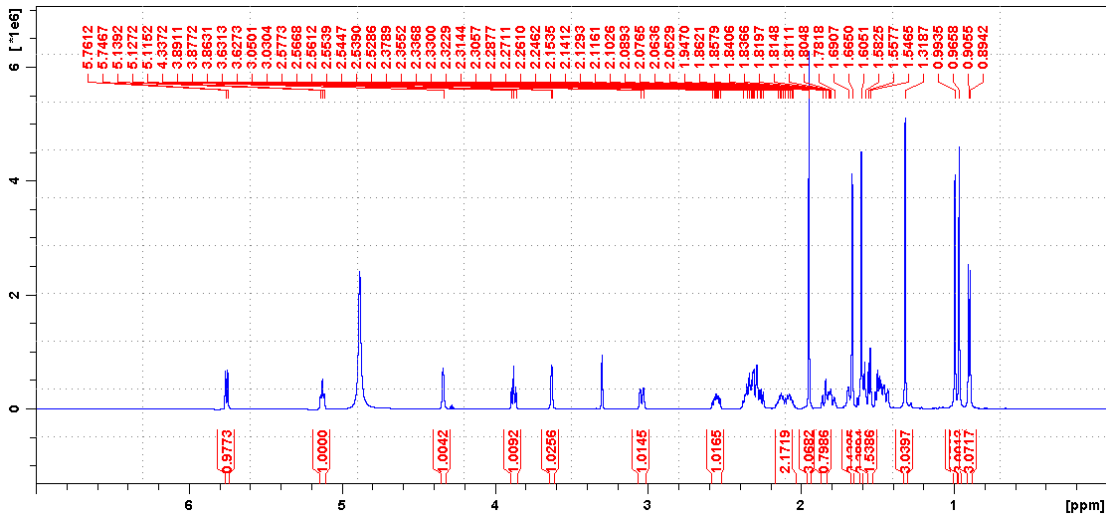

C

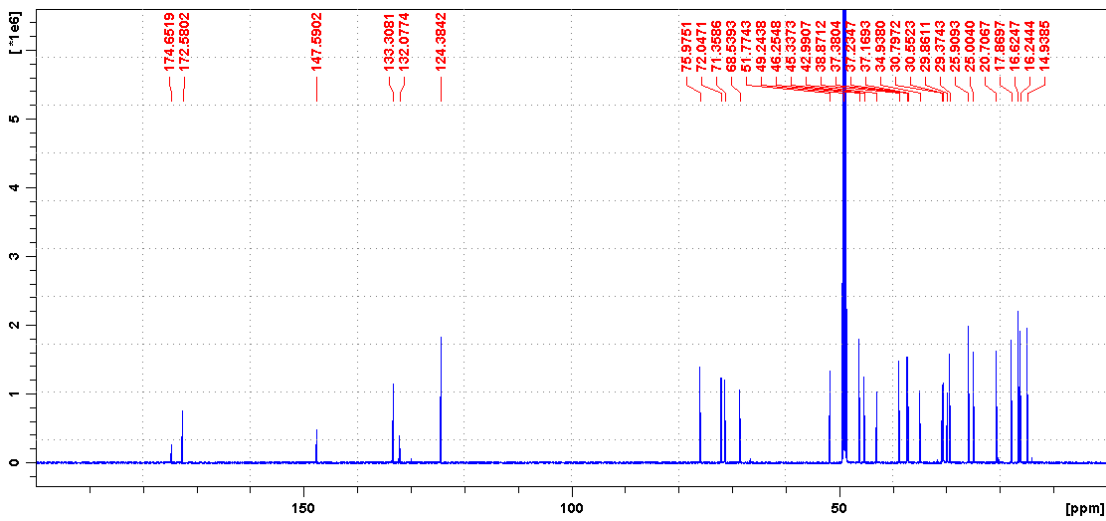

D

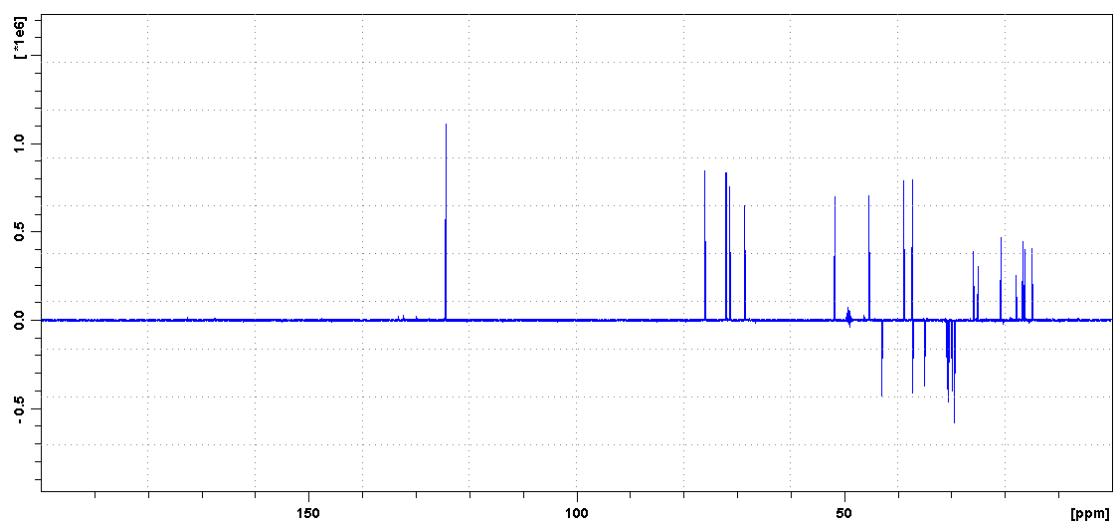

E

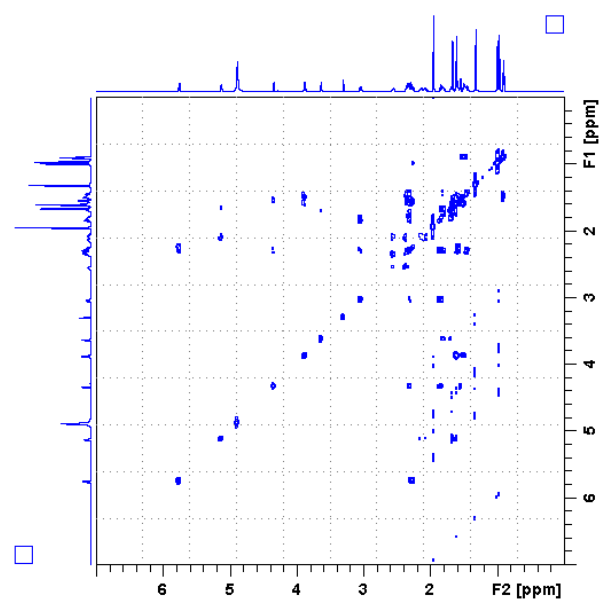

F

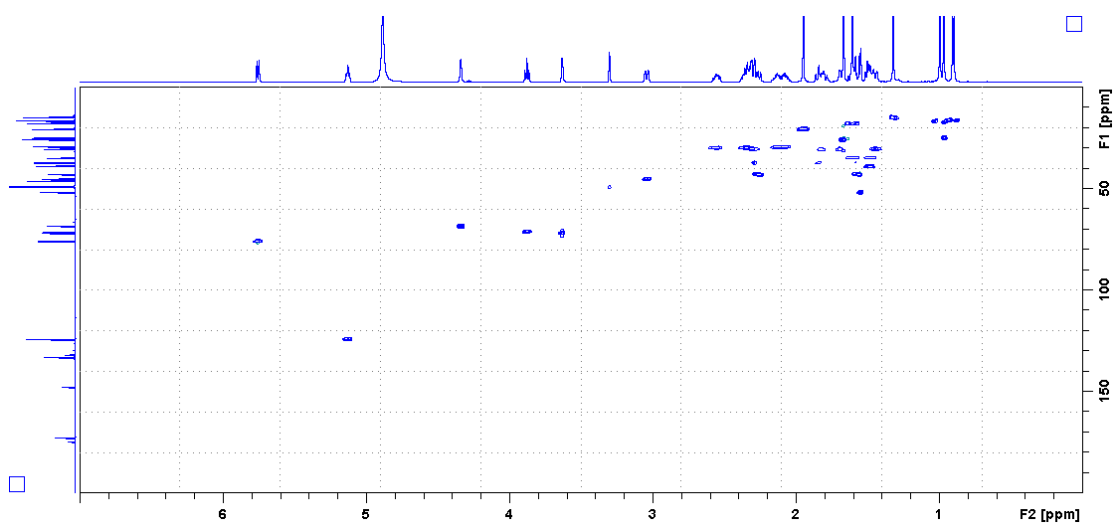

G

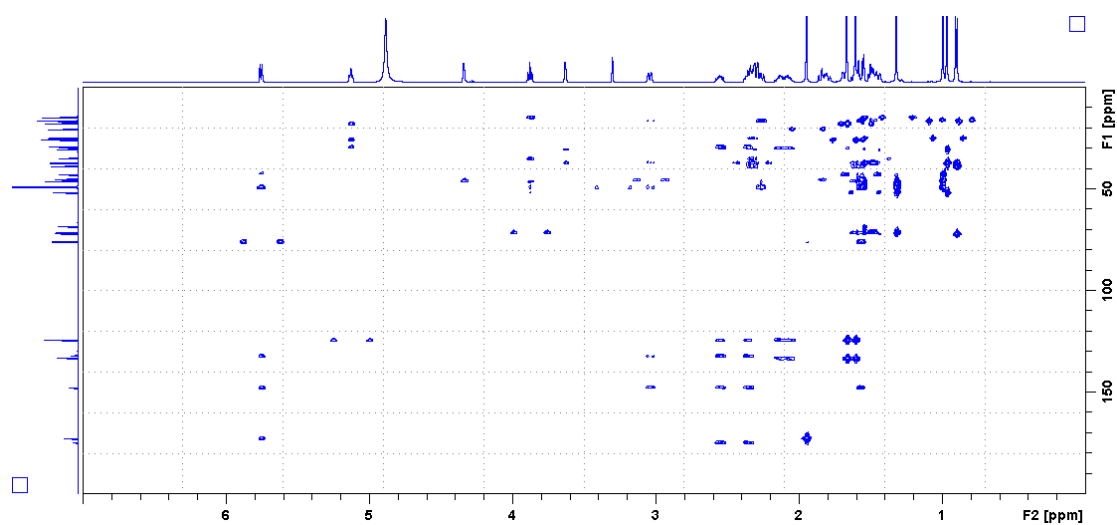

H

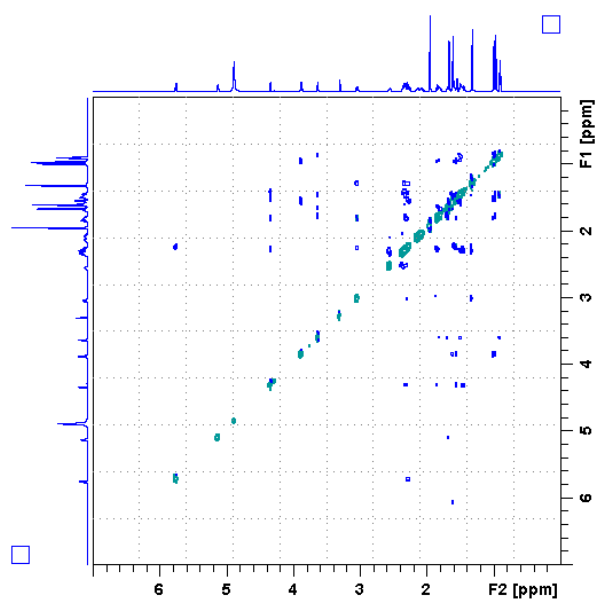

**Figure S47** HRESIMS and NMR spectra of **56**.

(A) HRESIMS spectrum; (B)  $^1\text{H}$  NMR spectrum in  $\text{CD}_3\text{OD}$  at 600 MHz; (C)  $^{13}\text{C}$  NMR spectrum in  $\text{CD}_3\text{OD}$  at 150 MHz; (D) DEPT 135 spectrum in  $\text{CD}_3\text{OD}$  at 150 MHz; (E)  $^1\text{H}$ - $^1\text{H}$  COSY spectrum in  $\text{CD}_3\text{OD}$  at 600 MHz; (F) HSQC spectrum in  $\text{CD}_3\text{OD}$  at 600 MHz; (G) HMBC spectrum in  $\text{CD}_3\text{OD}$  at 600 MHz; (H) ROESY spectrum in  $\text{CD}_3\text{OD}$  at 600 MHz.



A

Monoisotopic Mass, Even Electron Ions  
 275 formula(e) evaluated with 1 results within limits (up to 50 closest results for each mass)  
 Elements Used:  
 C: 0-500 H: 0-1000 O: 0-200 Na: 0-1  
 B3B1-C1-2-8  
 2018091040 215 (1.732)

1: TOF MS ES+  
 6.88e+005

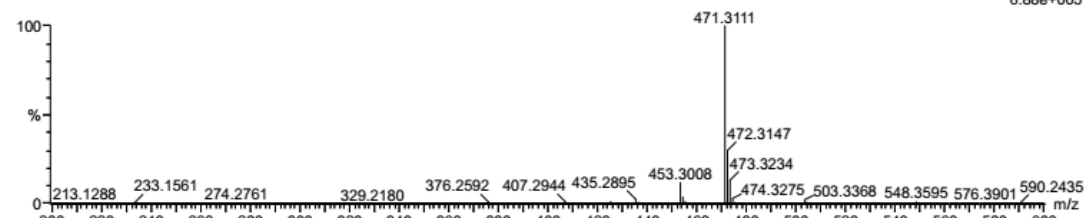

Minimum: -1.5  
 Maximum: 5.0 5.0 50.0

| Mass     | Calc. Mass | mDa | PPM | DBE | i-FIT | Norm | Conf (%) | Formula    |
|----------|------------|-----|-----|-----|-------|------|----------|------------|
| 531.3325 | 531.3322   | 0.3 | 0.6 | 8.5 | 225.5 | n/a  | n/a      | C31 H47 O7 |

B

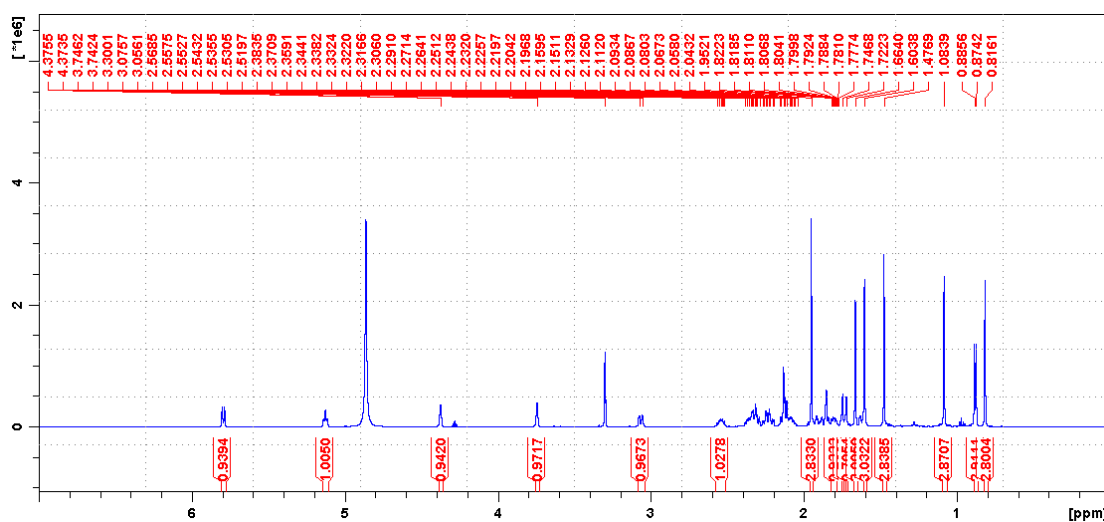

C

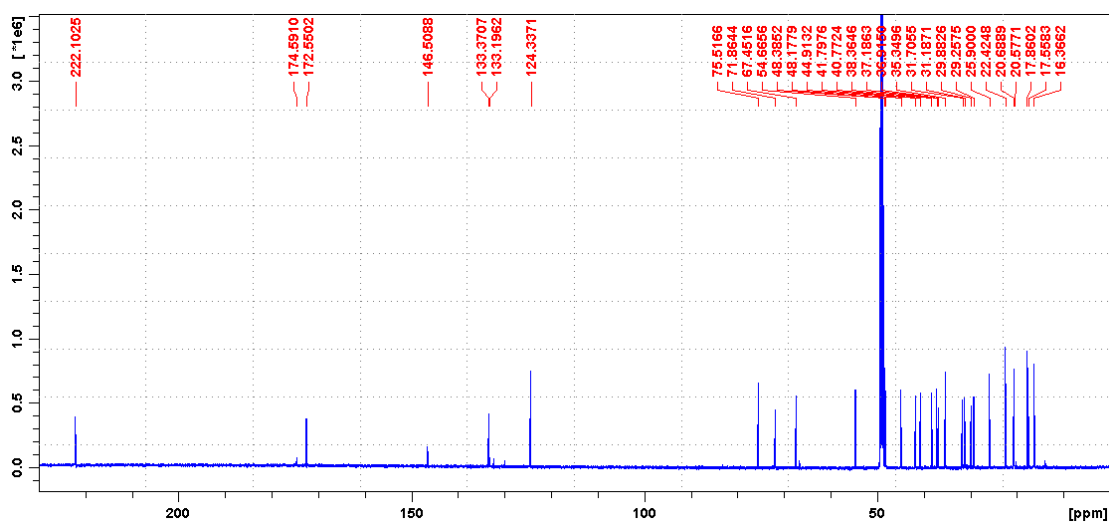

D

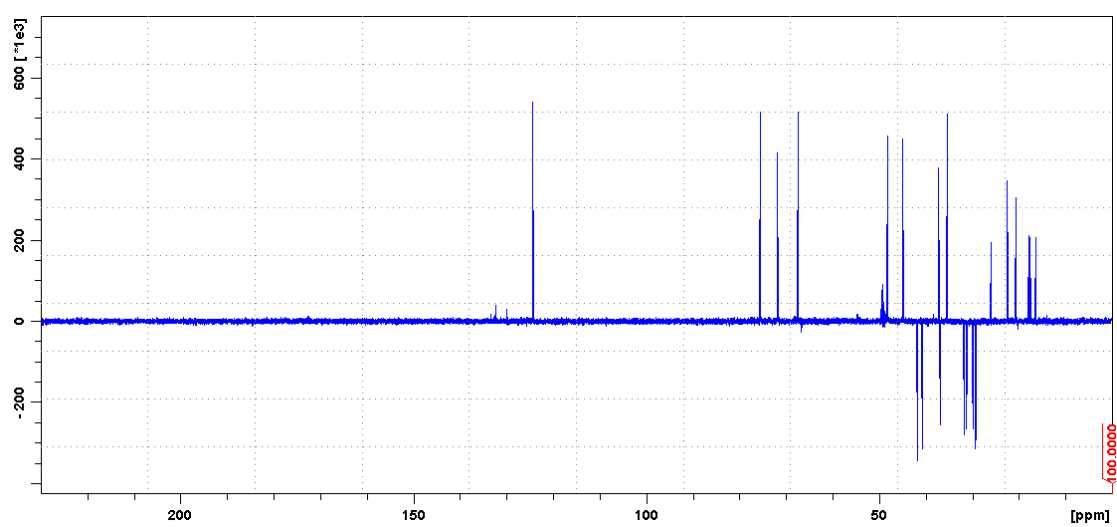

E

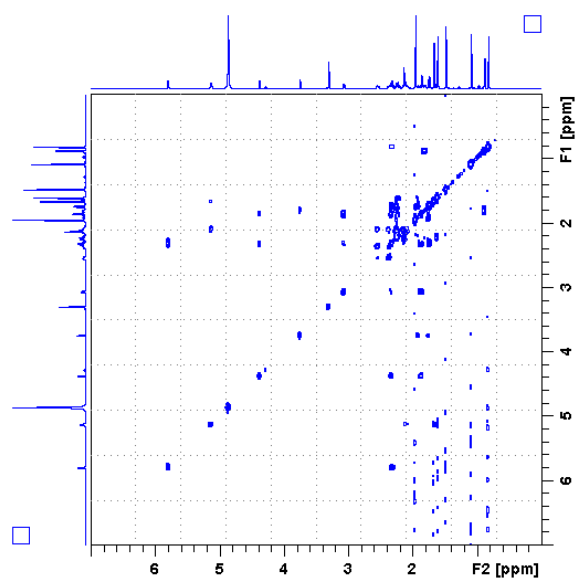

F

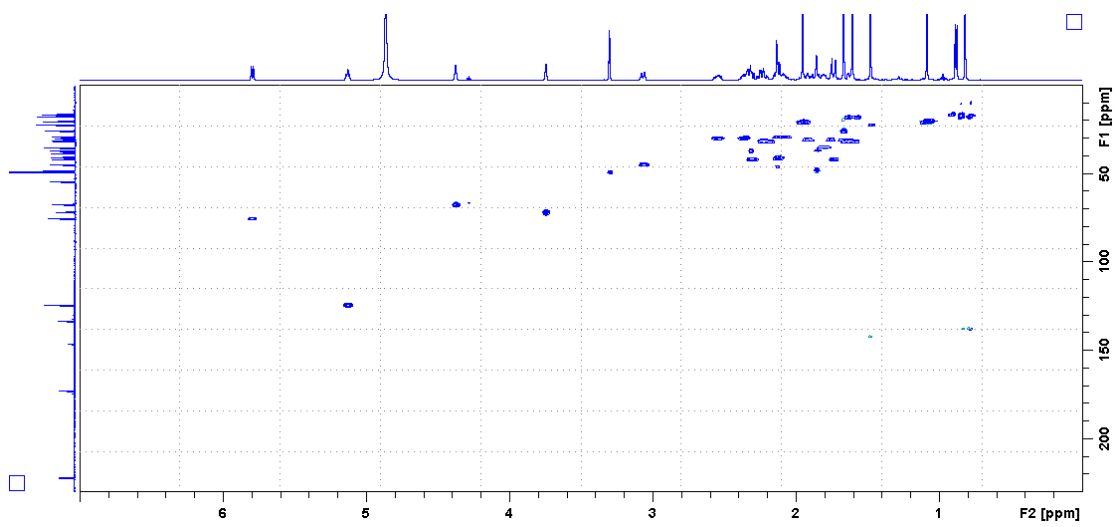

G

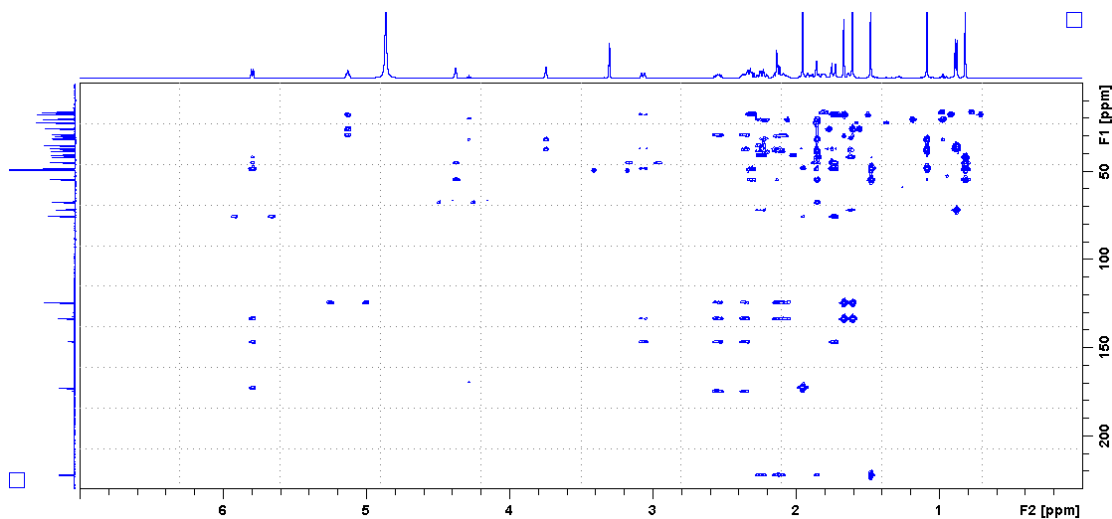

H

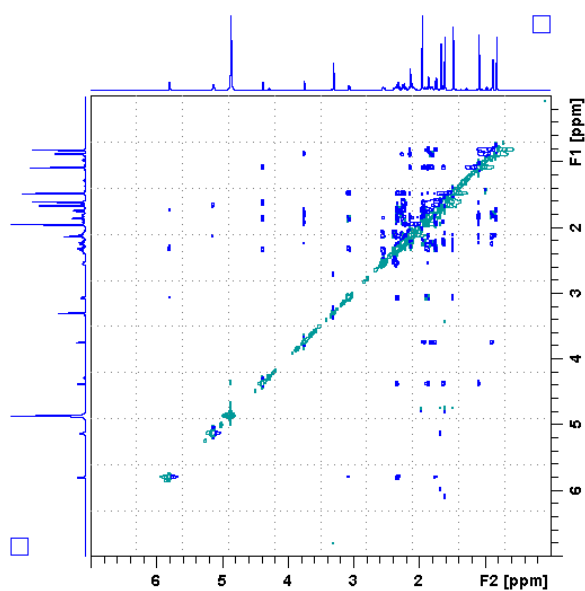

**Figure S48** HRESIMS and NMR spectra of **57**.

(A) HRESIMS spectrum; (B)  $^1\text{H}$  NMR spectrum in  $\text{CD}_3\text{OD}$  at 600 MHz; (C)  $^{13}\text{C}$  NMR spectrum in  $\text{CD}_3\text{OD}$  at 150 MHz; (D) DEPT 135 spectrum in  $\text{CD}_3\text{OD}$  at 150 MHz; (E)  $^1\text{H}$ - $^1\text{H}$  COSY spectrum in  $\text{CD}_3\text{OD}$  at 600 MHz; (F) HSQC spectrum in  $\text{CD}_3\text{OD}$  at 600 MHz; (G) HMBC spectrum in  $\text{CD}_3\text{OD}$  at 600 MHz; (H) ROESY spectrum in  $\text{CD}_3\text{OD}$  at 600 MHz.

A

Monoisotopic Mass, Even Electron Ions  
 339 formula(e) evaluated with 2 results within limits (up to 50 closest results for each mass)  
 Elements Used:  
 C: 0-500 H: 0-1000 O: 0-200 Na: 0-1  
 38  
 20190107\_42 210 (1.694)

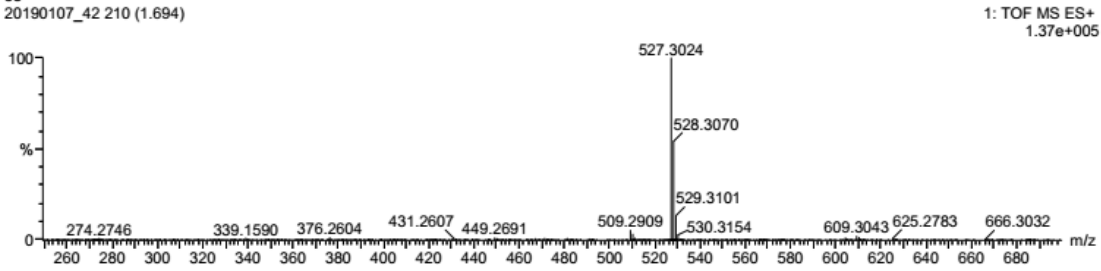

1: TOF MS ES+  
 1.37e+005

Minimum: -1.5  
 Maximum: 5.0 5.0 50.0

| Mass     | Calc. Mass | mDa  | PPM  | DBE  | i-FIT | Norm  | Conf (%) | Formula       |
|----------|------------|------|------|------|-------|-------|----------|---------------|
| 609.3043 | 609.3040   | 0.3  | 0.5  | 10.5 | 52.0  | 0.629 | 53.33    | C33 H46 O9 Na |
|          | 609.3064   | -2.1 | -3.4 | 13.5 | 52.1  | 0.762 | 46.67    | C35 H45 O9    |

B

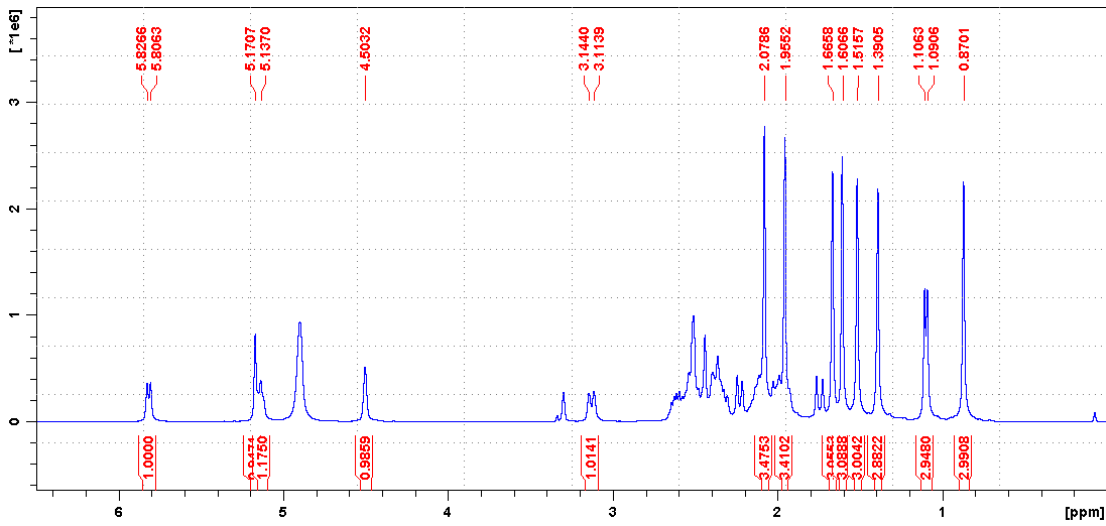

C

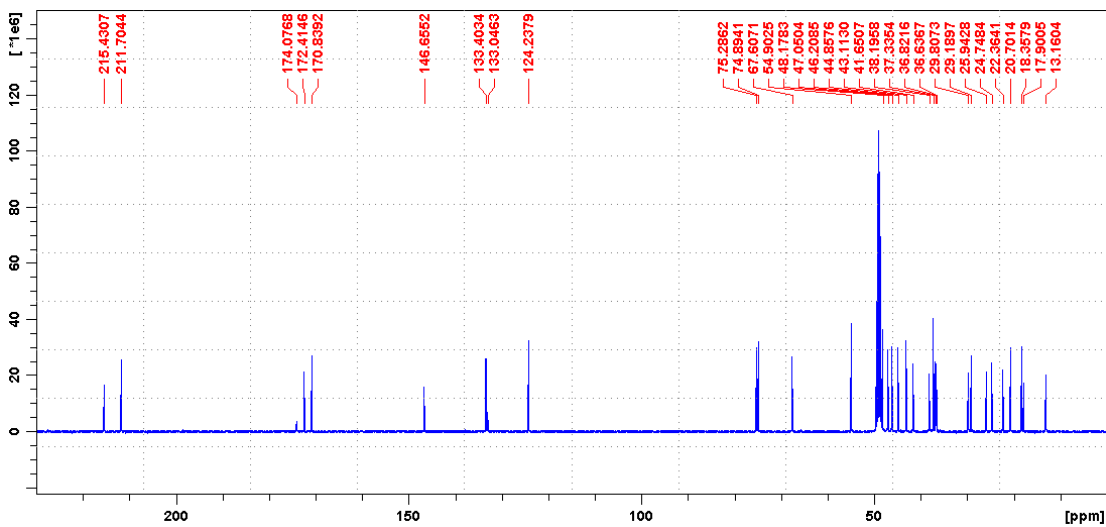

D

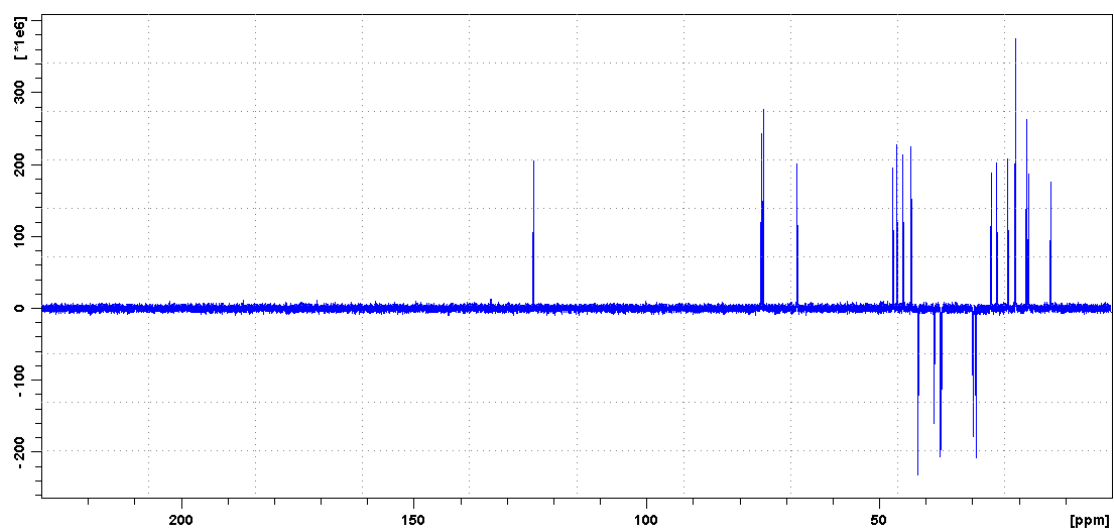

E

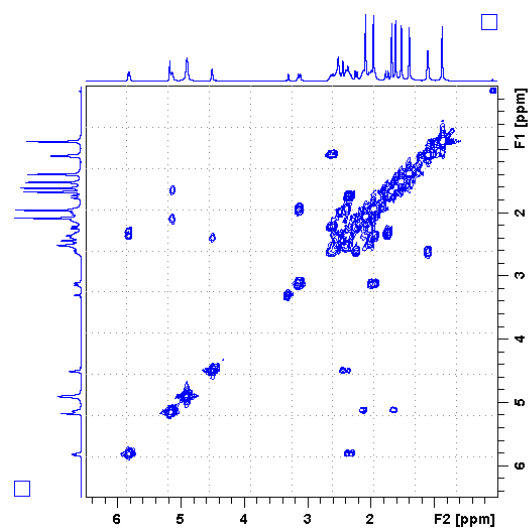

F

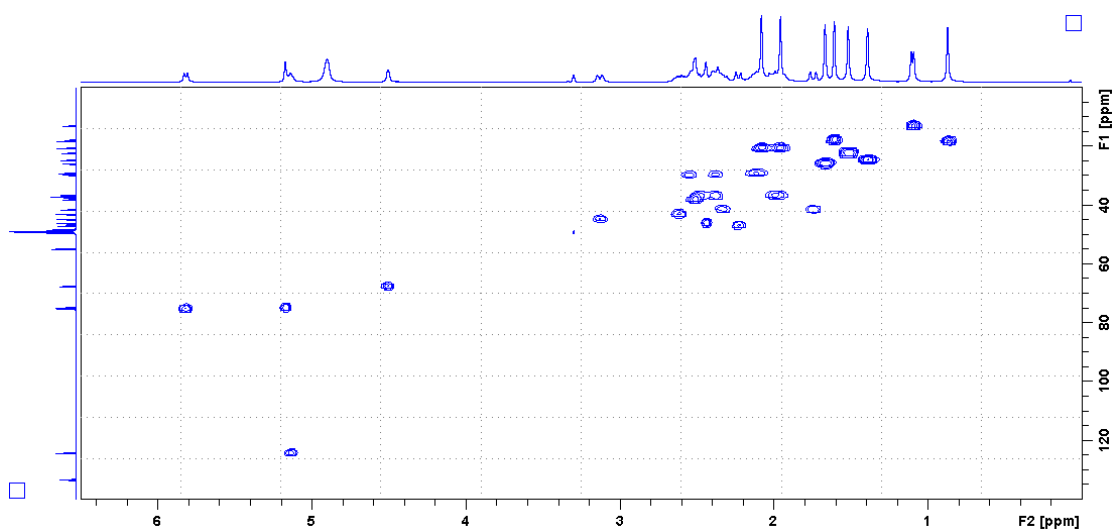

G

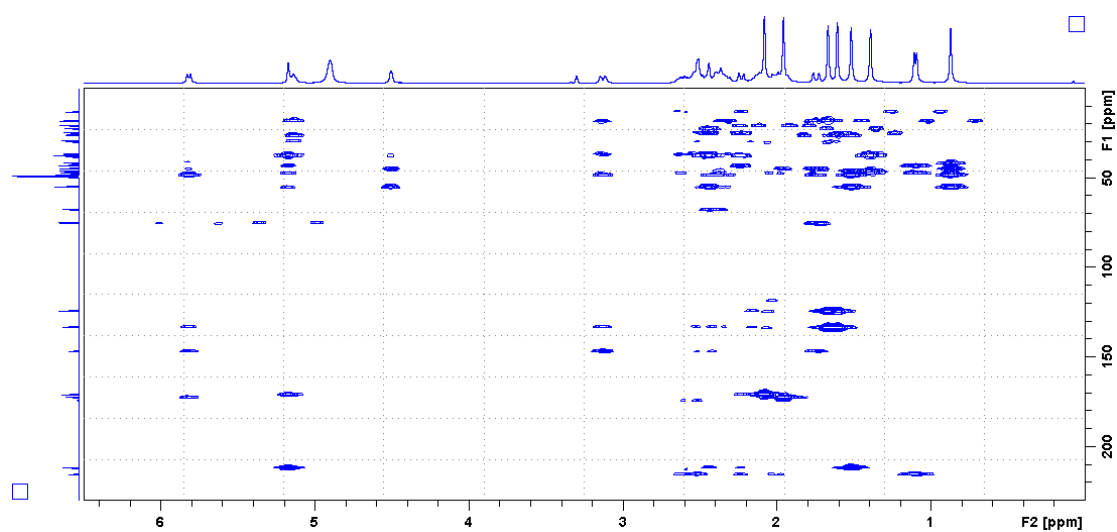

H

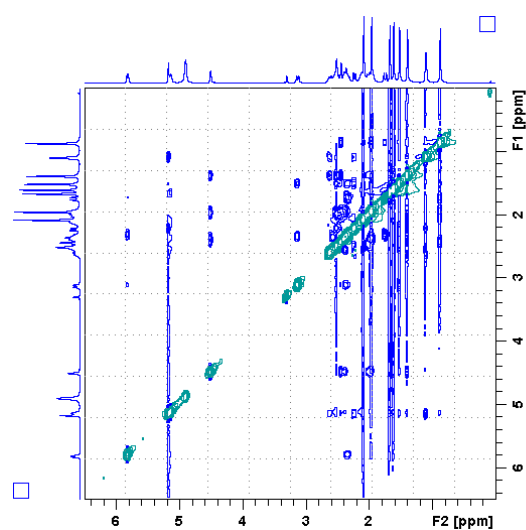

**Figure S49** HRESIMS and NMR spectra of **58**.

(A) HRESIMS spectrum; (B)  $^1\text{H}$  NMR spectrum in  $\text{CD}_3\text{OD}$  at 400 MHz; (C)  $^{13}\text{C}$  NMR spectrum in  $\text{CD}_3\text{OD}$  at 100 MHz; (D) DEPT 135 spectrum in  $\text{CD}_3\text{OD}$  at 100 MHz; (E)  $^1\text{H}$ - $^1\text{H}$  COSY spectrum in  $\text{CD}_3\text{OD}$  at 400 MHz; (F) HSQC spectrum in  $\text{CD}_3\text{OD}$  at 400 MHz; (G) HMBC spectrum in  $\text{CD}_3\text{OD}$  at 400 MHz; (H) ROESY spectrum in  $\text{CD}_3\text{OD}$  at 400 MHz.

A

Monoisotopic Mass, Even Electron Ions  
 353 formula(e) evaluated with 2 results within limits (up to 50 closest results for each mass)  
 Elements Used:  
 C: 0-500 H: 0-1000 O: 0-200 Na: 0-1

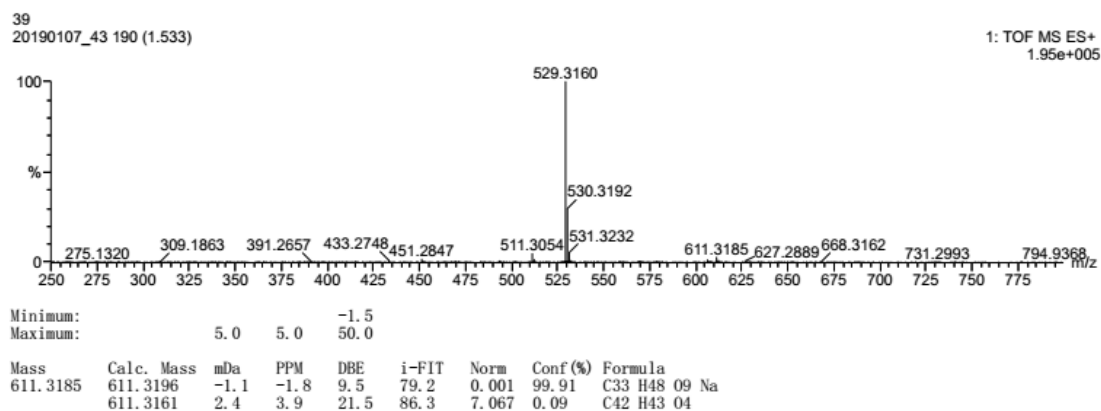

B

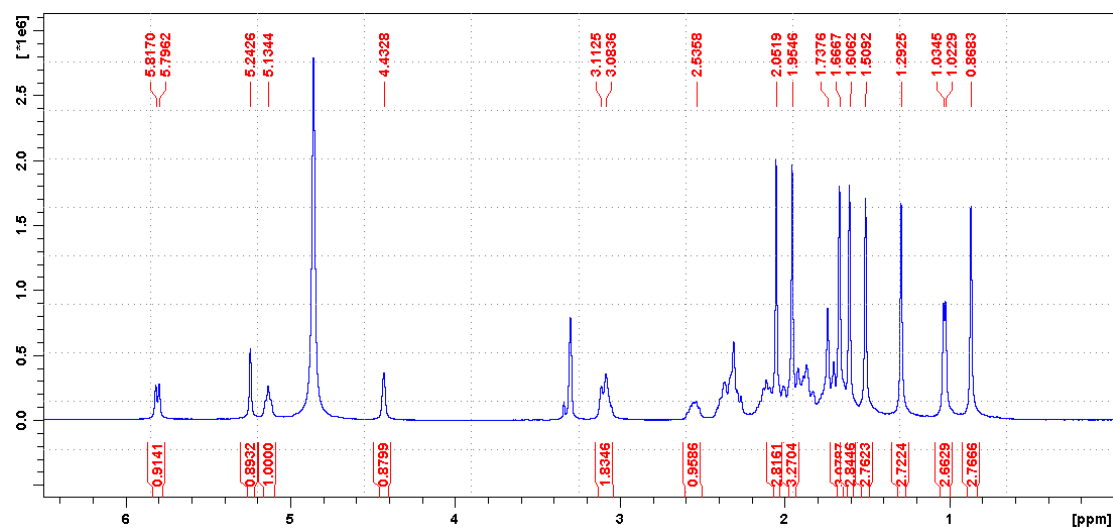

C

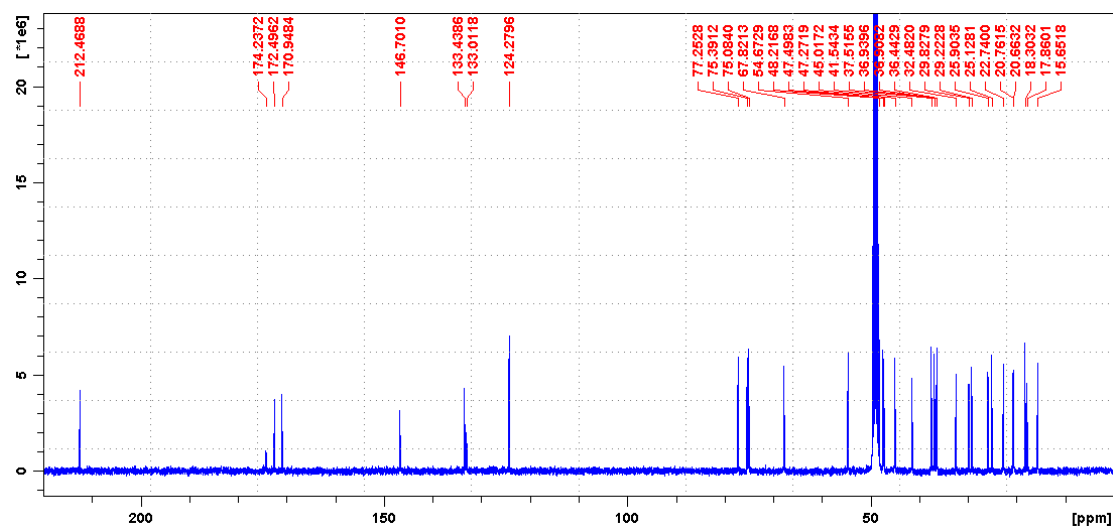

D

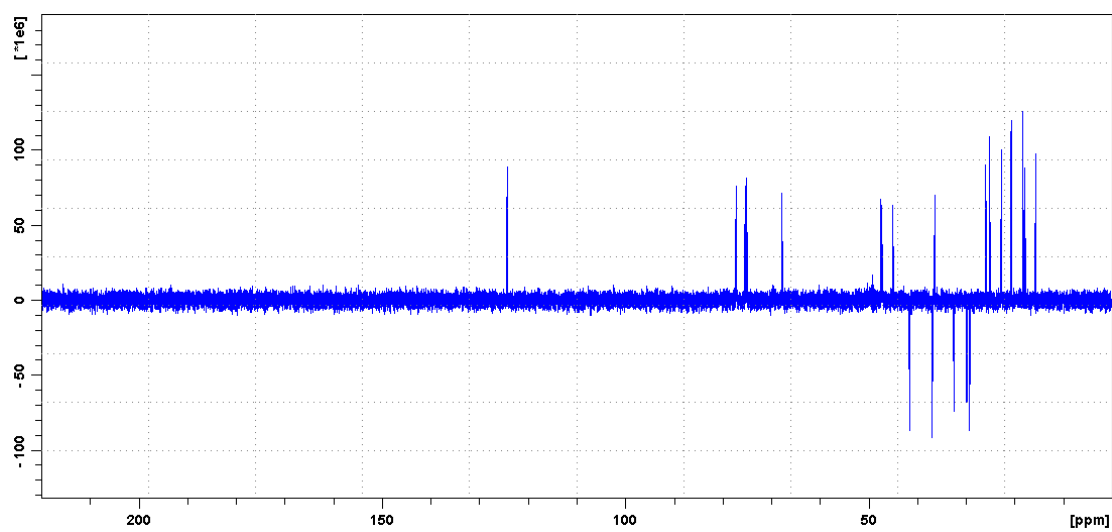

E

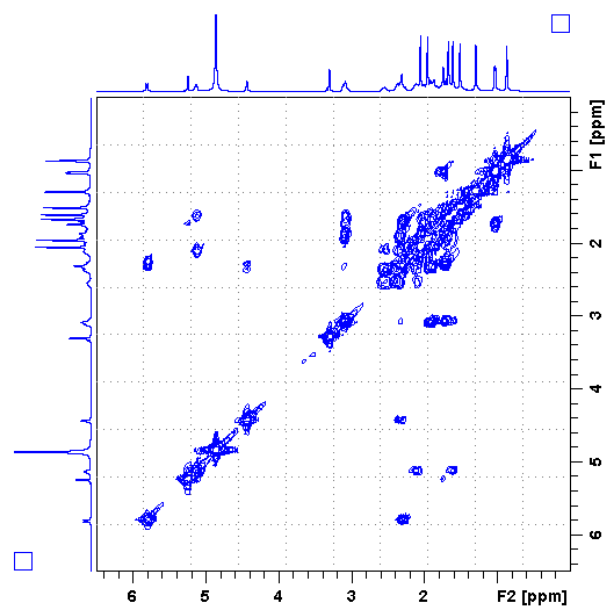

F

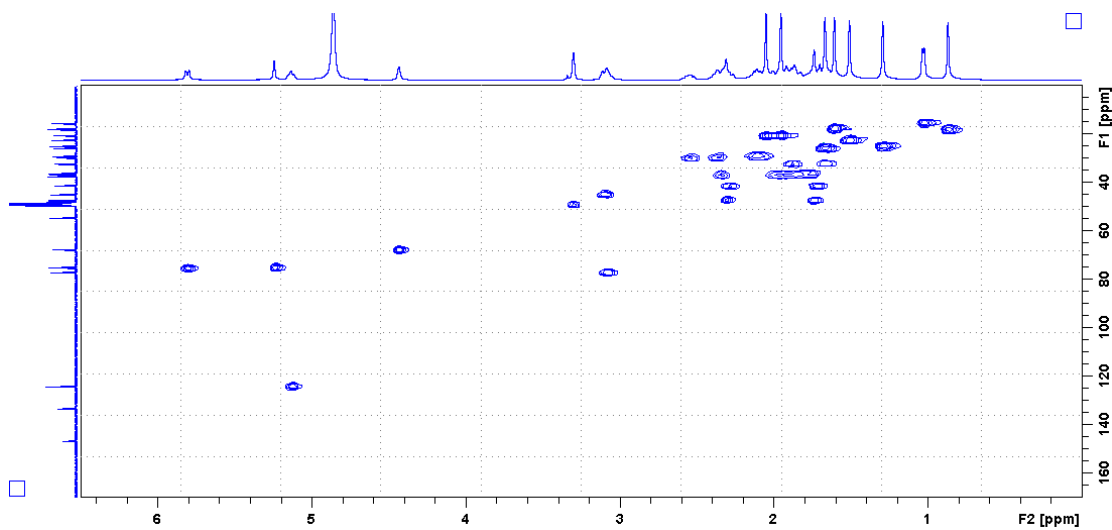



G

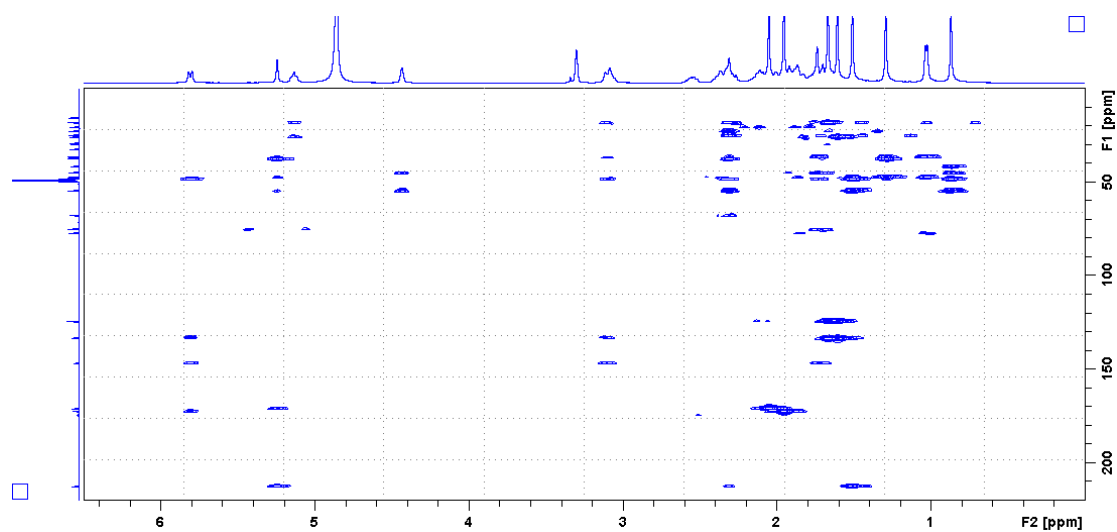

H

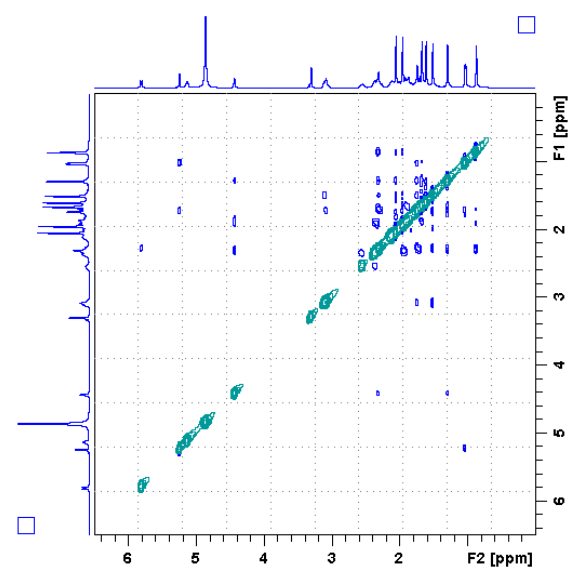

**Figure S50** HRESIMS and NMR spectra of **59**.

(A) HRESIMS spectrum; (B)  $^1\text{H}$  NMR spectrum in  $\text{CD}_3\text{OD}$  at 400 MHz; (C)  $^{13}\text{C}$  NMR spectrum in  $\text{CD}_3\text{OD}$  at 100 MHz; (D) DEPT 135 spectrum in  $\text{CD}_3\text{OD}$  at 100 MHz; (E)  $^1\text{H}$ - $^1\text{H}$  COSY spectrum in  $\text{CD}_3\text{OD}$  at 400 MHz; (F) HSQC spectrum in  $\text{CD}_3\text{OD}$  at 400 MHz; (G) HMBC spectrum in  $\text{CD}_3\text{OD}$  at 400 MHz; (H) ROESY spectrum in  $\text{CD}_3\text{OD}$  at 400 MHz.

A

Monoisotopic Mass, Even Electron Ions  
 336 formula(e) evaluated with 2 results within limits (up to 50 closest results for each mass)  
 Elements Used:  
 C: 0-500 H: 0-1000 O: 0-200 Na: 0-1  
 32  
 20190107\_36 243 (1.964)

1: TOF MS ES+  
 7.26e+004

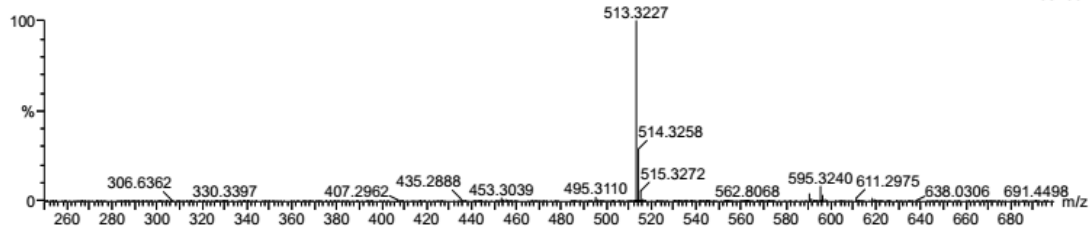

| Mass     | Calc. Mass | mDa  | PPM  | DBE  | i-FIT | Norm  | Conf (%) | Formula       |
|----------|------------|------|------|------|-------|-------|----------|---------------|
| 595.3240 | 595.3247   | -0.7 | -1.2 | 9.5  | 82.4  | 0.050 | 95.17    | C33 H48 O8 Na |
|          | 595.3212   | 2.8  | 4.7  | 21.5 | 85.4  | 3.030 | 4.83     | C42 H43 O3    |

B

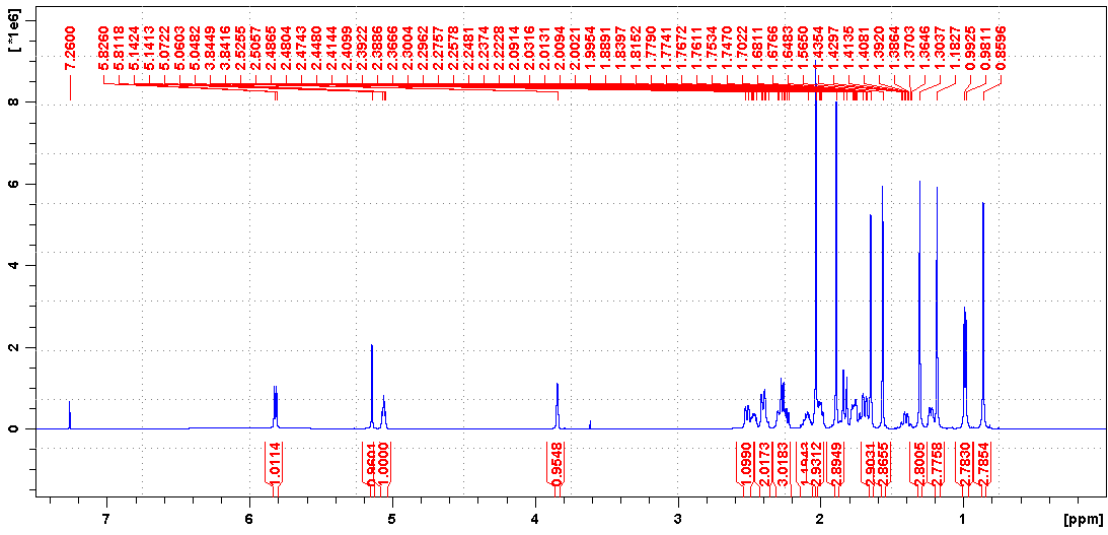

C

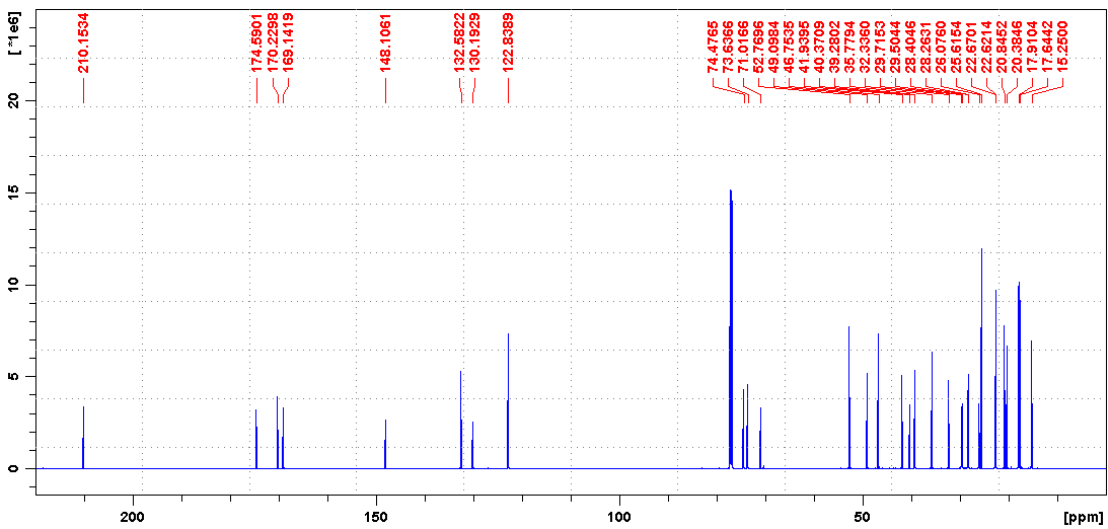

D

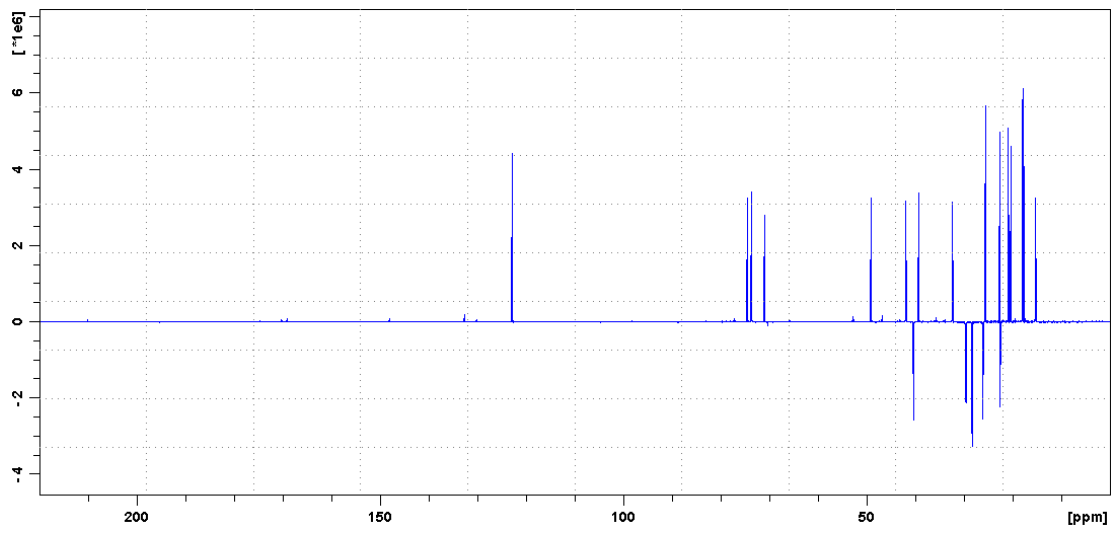

E

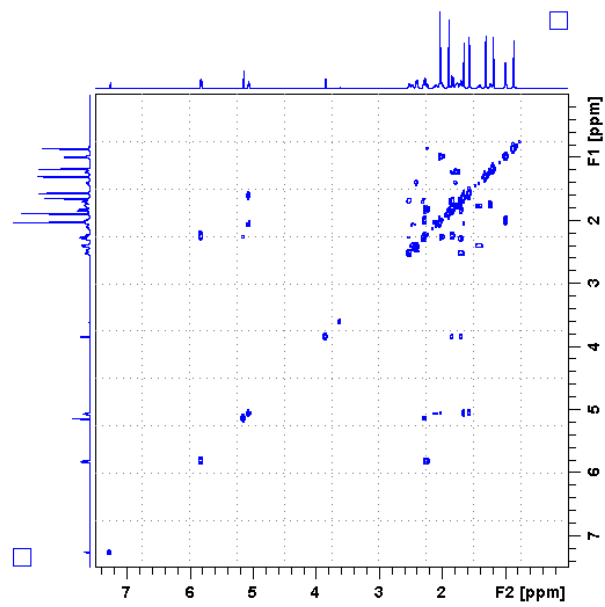

F

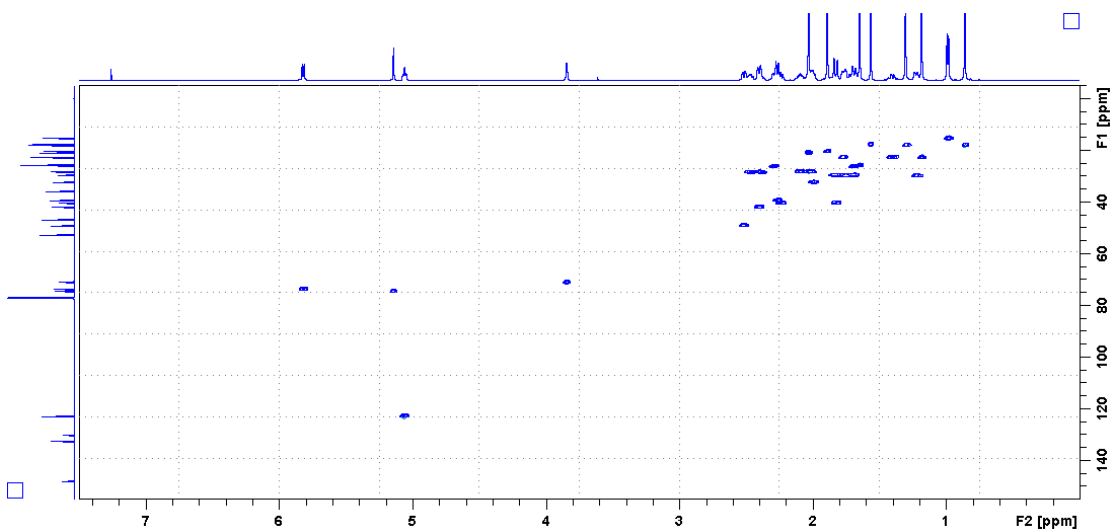

G

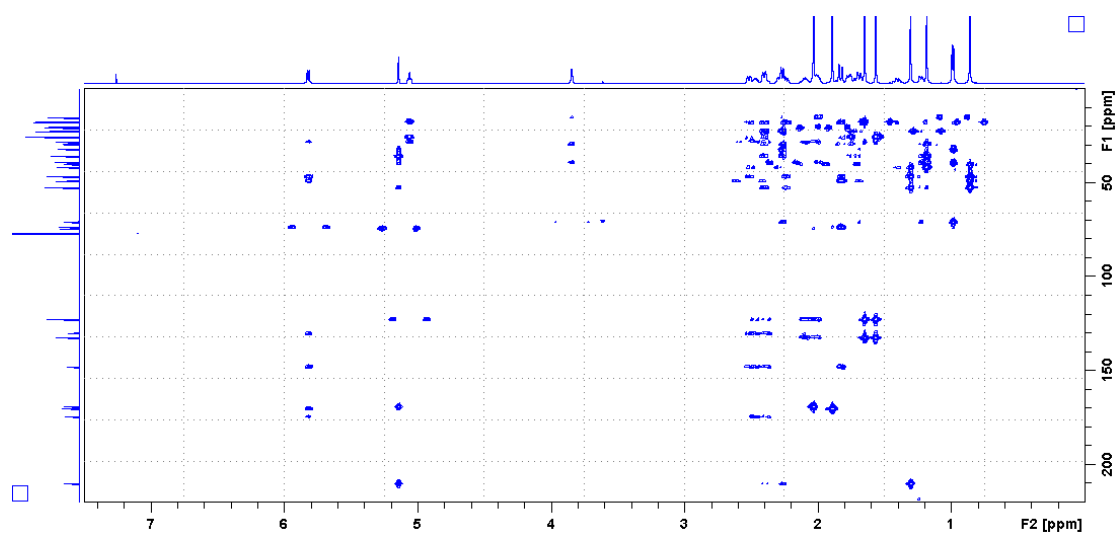

H

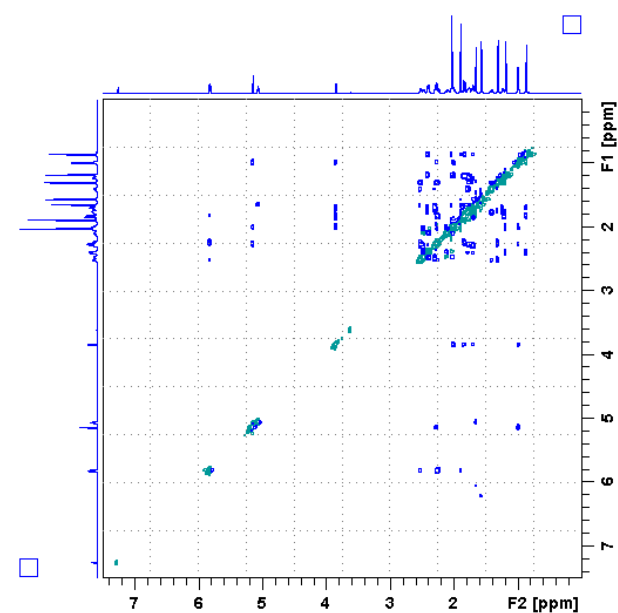

**Figure S51** HRESIMS and NMR spectra of **60**.

(A) HRESIMS spectrum; (B)  $^1\text{H}$  NMR spectrum in  $\text{CDCl}_3$  at 600 MHz; (C)  $^{13}\text{C}$  NMR spectrum in  $\text{CDCl}_3$  at 150 MHz; (D) DEPT 135 spectrum in  $\text{CDCl}_3$  at 150 MHz; (E)  $^1\text{H}$ - $^1\text{H}$  COSY spectrum in  $\text{CDCl}_3$  at 600 MHz; (F) HSQC spectrum in  $\text{CDCl}_3$  at 600 MHz; (G) HMBC spectrum in  $\text{CDCl}_3$  at 600 MHz; (H) ROESY spectrum in  $\text{CDCl}_3$  at 600 MHz.

A

Monoisotopic Mass, Even Electron Ions  
 315 formula(e) evaluated with 2 results within limits (up to 50 closest results for each mass)  
 Elements Used:  
 C: 0-500 H: 0-1000 O: 0-200 Na: 0-1  
 EB1-B3D1-5  
 20180423-45 207 (1.672)

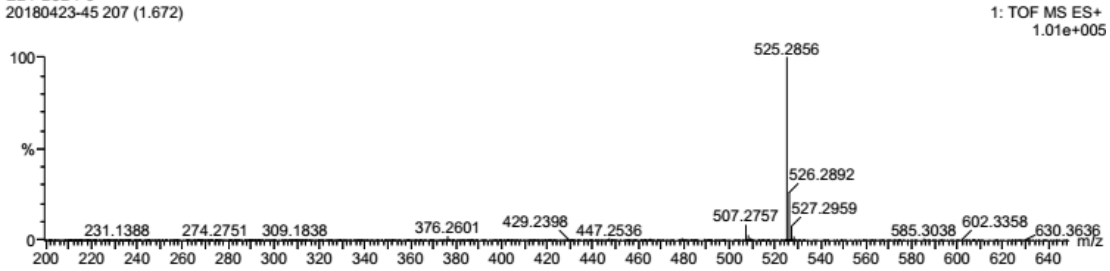

1: TOF MS ES+  
1.01e+005

| Mass     | Calc. Mass | mDa  | PPM  | DBE  | i-FIT | Norm  | Conf (%) | Formula       |
|----------|------------|------|------|------|-------|-------|----------|---------------|
| 585.3038 | 585.3064   | -2.6 | -4.4 | 11.5 | 24.7  | 0.903 | 40.54    | C33 H45 O9    |
|          | 585.3040   | -0.2 | -0.3 | 8.5  | 24.4  | 0.520 | 59.46    | C31 H46 O9 Na |

B

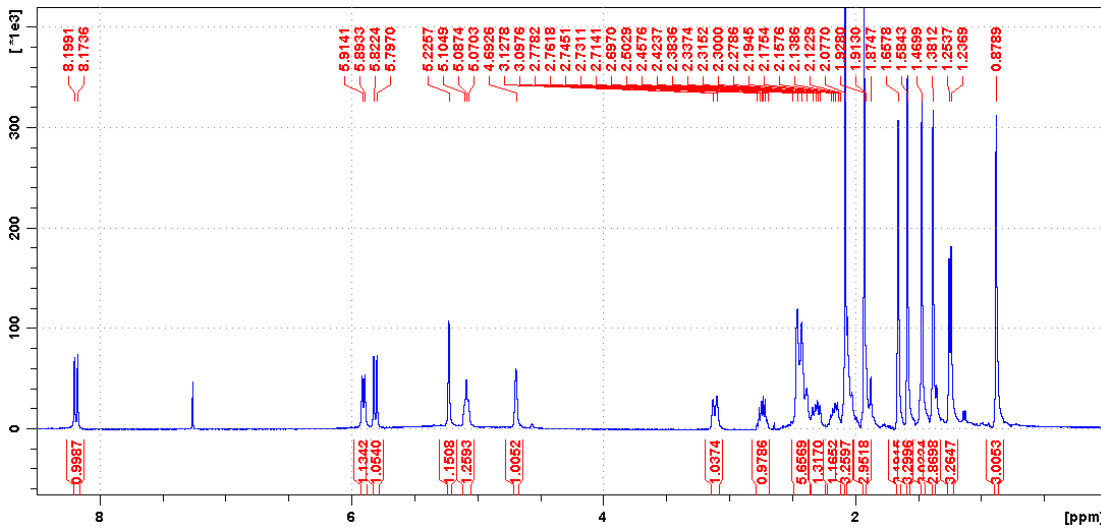

C

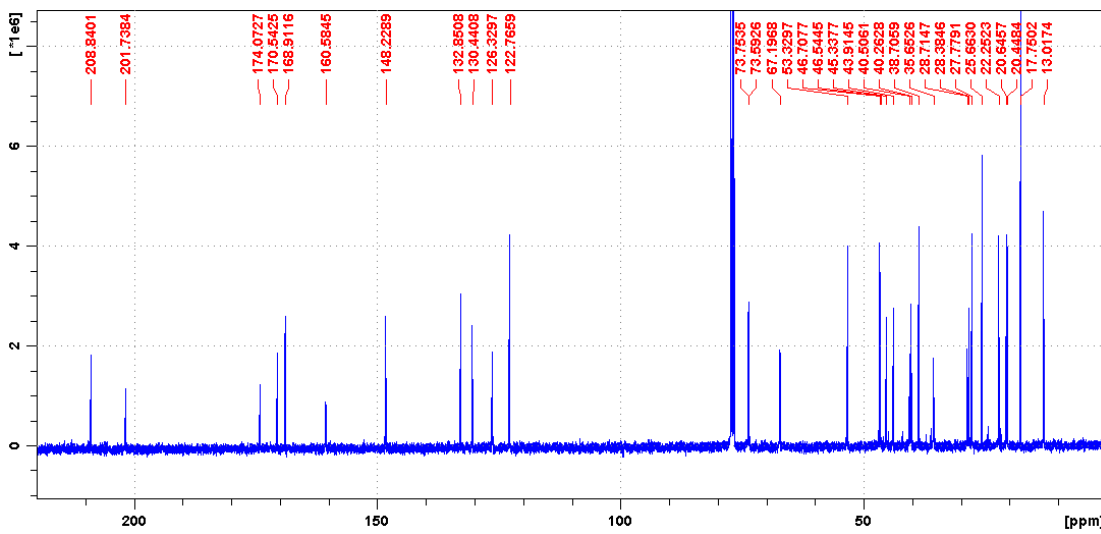

D

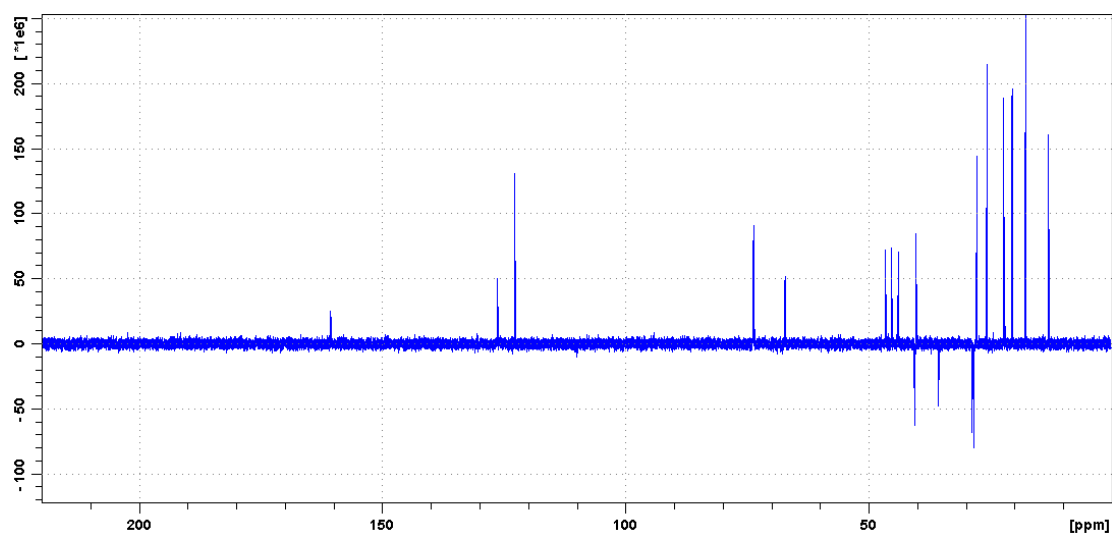

E

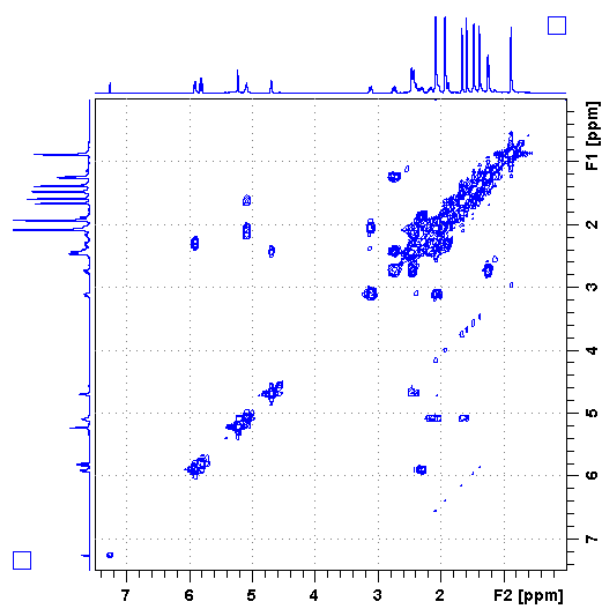

F

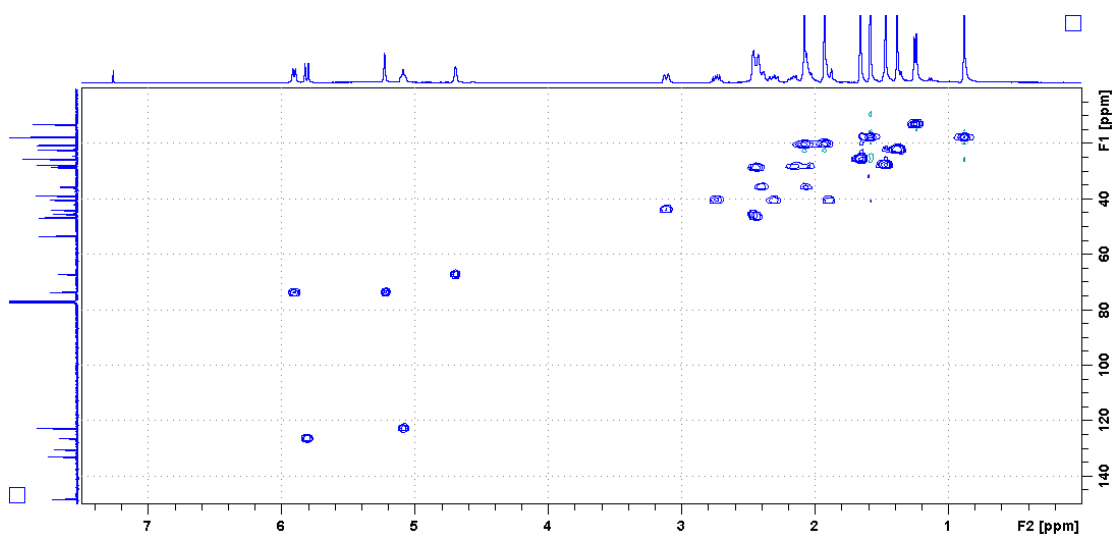

G

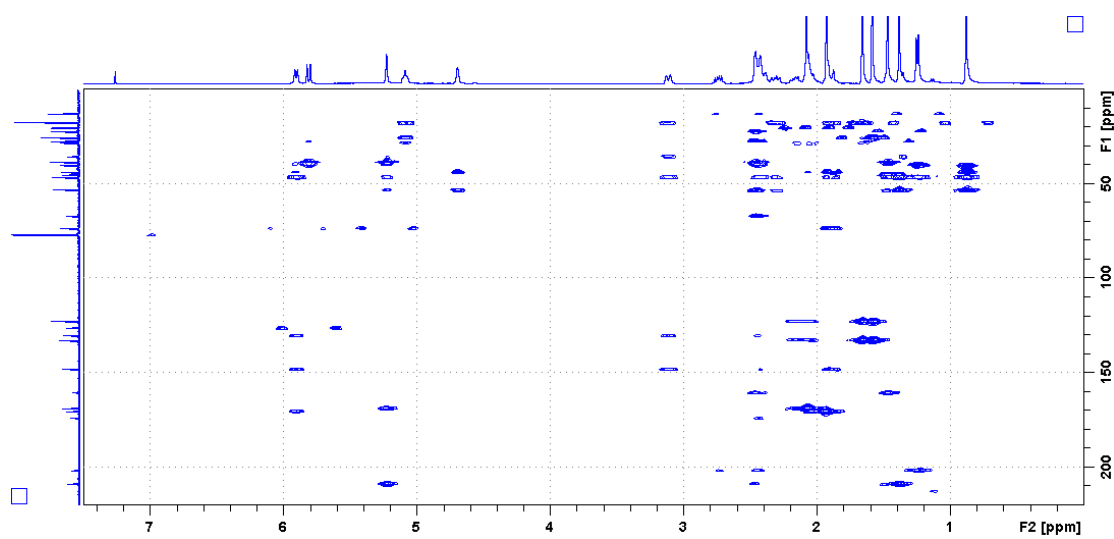

H

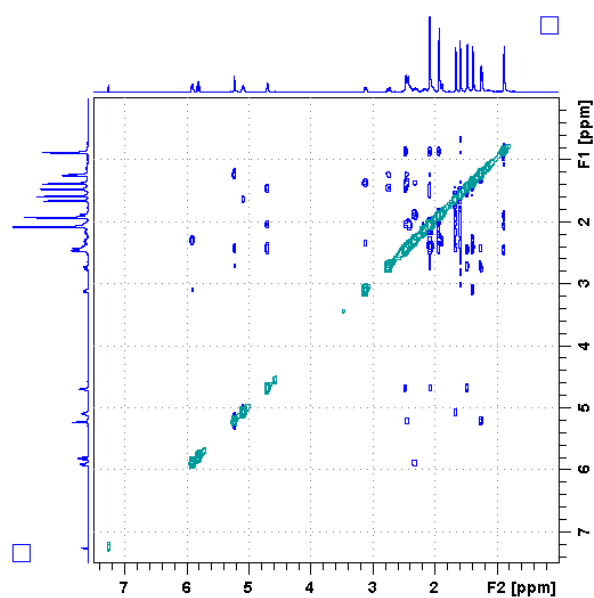

**Figure S52** HRESIMS and NMR spectra of **61**.

(A) HRESIMS spectrum; (B)  $^1\text{H}$  NMR spectrum in  $\text{CDCl}_3$  at 400 MHz; (C)  $^{13}\text{C}$  NMR spectrum in  $\text{CDCl}_3$  at 100 MHz; (D) DEPT 135 spectrum in  $\text{CDCl}_3$  at 100 MHz; (E)  $^1\text{H}$ - $^1\text{H}$  COSY spectrum in  $\text{CDCl}_3$  at 400 MHz; (F) HSQC spectrum in  $\text{CDCl}_3$  at 400 MHz; (G) HMBC spectrum in  $\text{CDCl}_3$  at 400 MHz; (H) ROESY spectrum in  $\text{CDCl}_3$  at 400 MHz.

A

Monoisotopic Mass, Even Electron Ions  
310 formula(e) evaluated with 2 results within limits (up to 50 closest results for each mass)  
Elements Used:  
C: 0-500 H: 0-1000 O: 0-200 Na: 0-1  
EB1C1-B3-80-3  
20190923026 185 (1.496)

1: TOF MS ES+  
3.42e+004

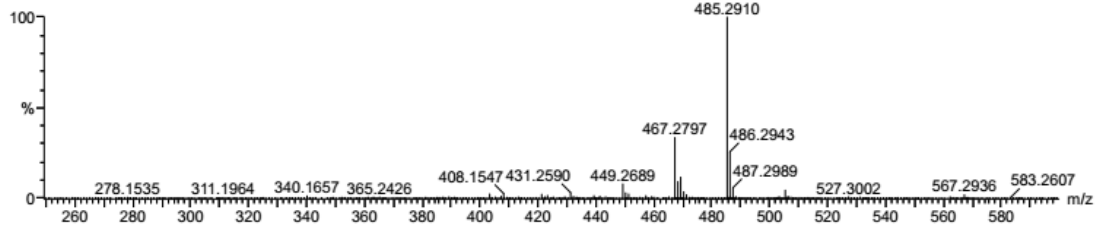

Minimum: -1.5  
Maximum: 5.0 5.0 50.0

| Mass     | Calc. Mass | mDa  | PPM  | DBE  | i-FIT | Norm  | Conf (%) | Formula       |
|----------|------------|------|------|------|-------|-------|----------|---------------|
| 567.2936 | 567.2934   | 0.2  | 0.4  | 9.5  | 84.2  | 0.173 | 84.08    | C31 H44 O8 Na |
| 567.2958 | 567.2958   | -2.2 | -3.9 | 12.5 | 85.9  | 1.838 | 15.92    | C33 H43 O8    |

B

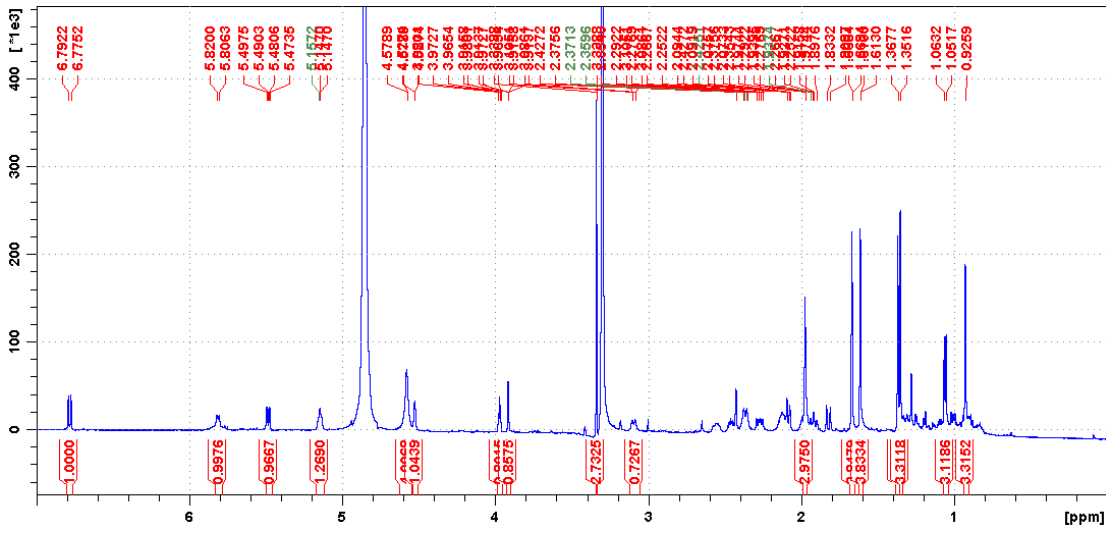

C

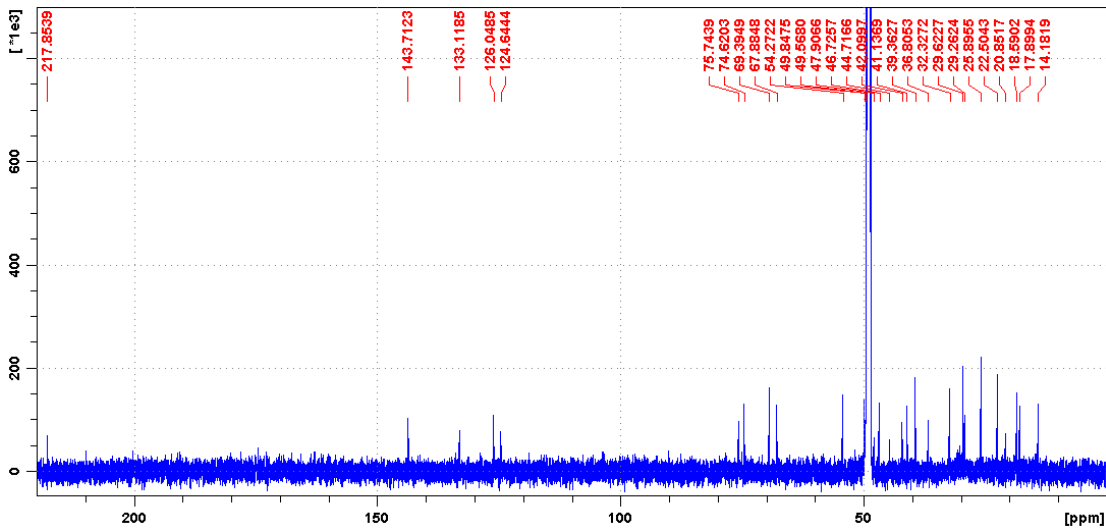



D

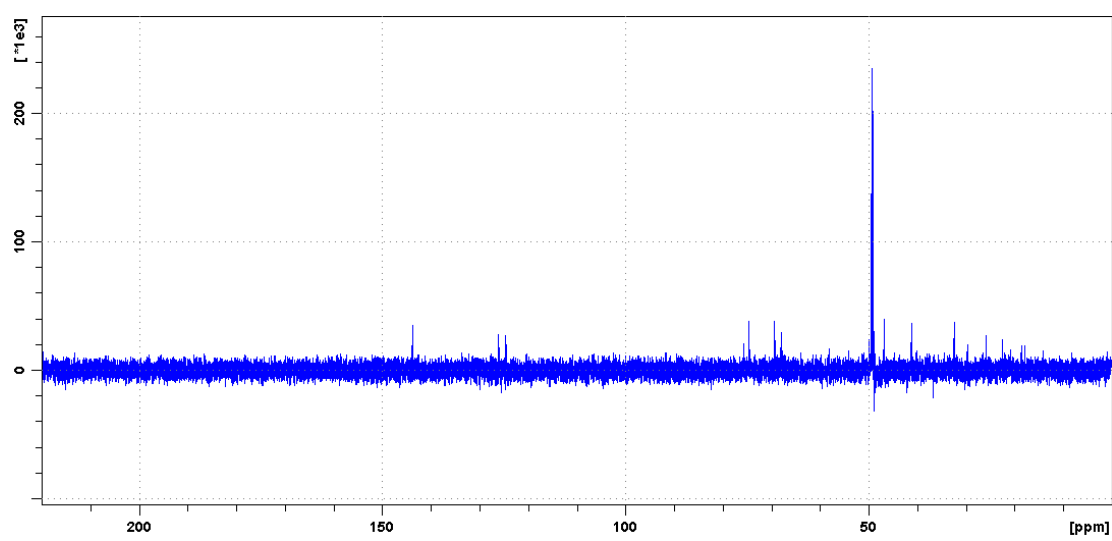

E

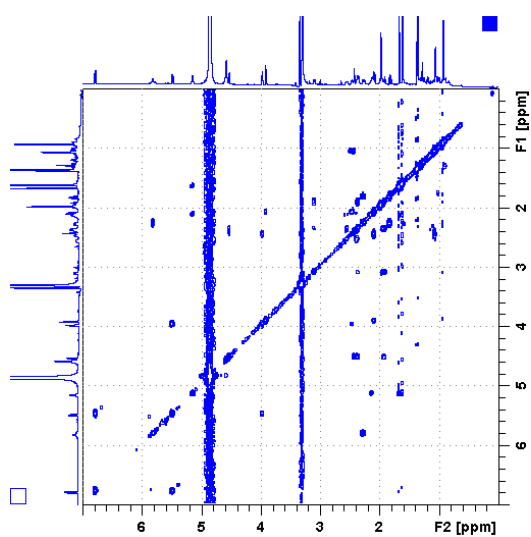

F

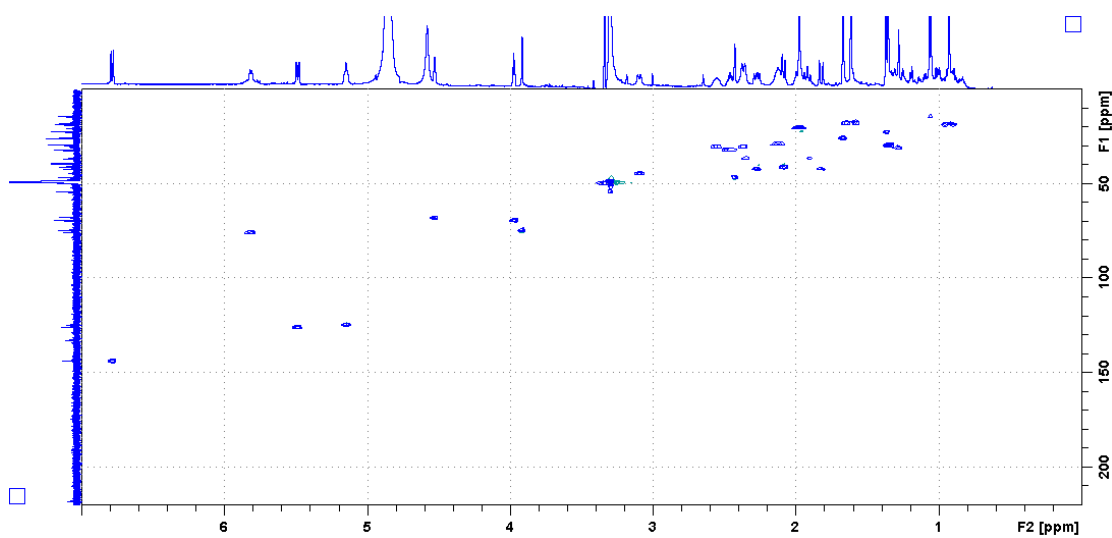

G

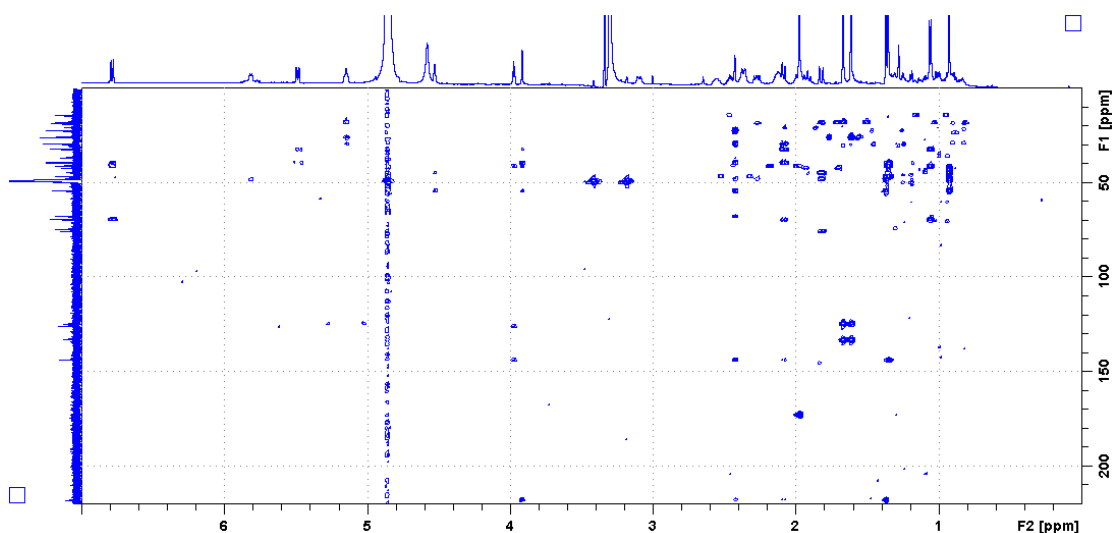

H

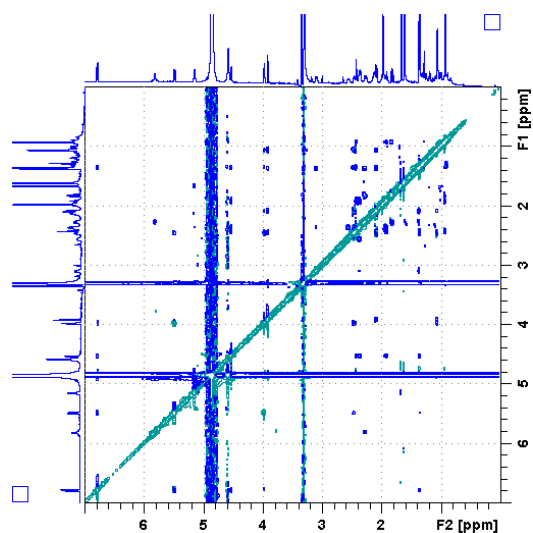

**Figure S53** HRESIMS and NMR spectra of **62**.

(A) HRESIMS spectrum; (B)  $^1\text{H}$  NMR spectrum in  $\text{CD}_3\text{OD}$  at 600 MHz; (C)  $^{13}\text{C}$  NMR spectrum in  $\text{CD}_3\text{OD}$  at 150 MHz; (D) DEPT 135 spectrum in  $\text{CD}_3\text{OD}$  at 150 MHz; (E)  $^1\text{H}$ – $^1\text{H}$  COSY spectrum in  $\text{CD}_3\text{OD}$  at 600 MHz; (F) HSQC spectrum in  $\text{CD}_3\text{OD}$  at 600 MHz; (G) HMBC spectrum in  $\text{CD}_3\text{OD}$  at 600 MHz; (H) ROESY spectrum in  $\text{CD}_3\text{OD}$  at 600 MHz.

A

Monoisotopic Mass, Even Electron Ions  
 313 formula(e) evaluated with 2 results within limits (up to 50 closest results for each mass)  
 Elements Used:  
 C: 0-200 H: 0-1000 O: 0-200 Na: 0-1  
 EB4C1D2-80-1  
 20191118042 224 (1.810)

1: TOF MS ES+  
 2.28e+005

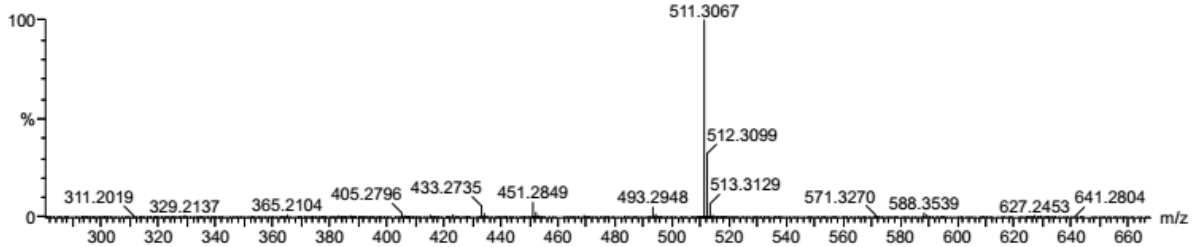

Minimum: -1.5  
 Maximum: 5.0 5.0 50.0

| Mass     | Calc. Mass | mDa  | PPM  | DBE  | i-FIT | Norm  | Conf (%) | Formula       |
|----------|------------|------|------|------|-------|-------|----------|---------------|
| 571.3270 | 571.3271   | -0.1 | -0.2 | 10.5 | 73.4  | 1.369 | 25.45    | C33 H47 O8    |
|          | 571.3247   | 2.3  | 4.0  | 7.5  | 72.3  | 0.294 | 74.55    | C31 H48 O8 Na |

B

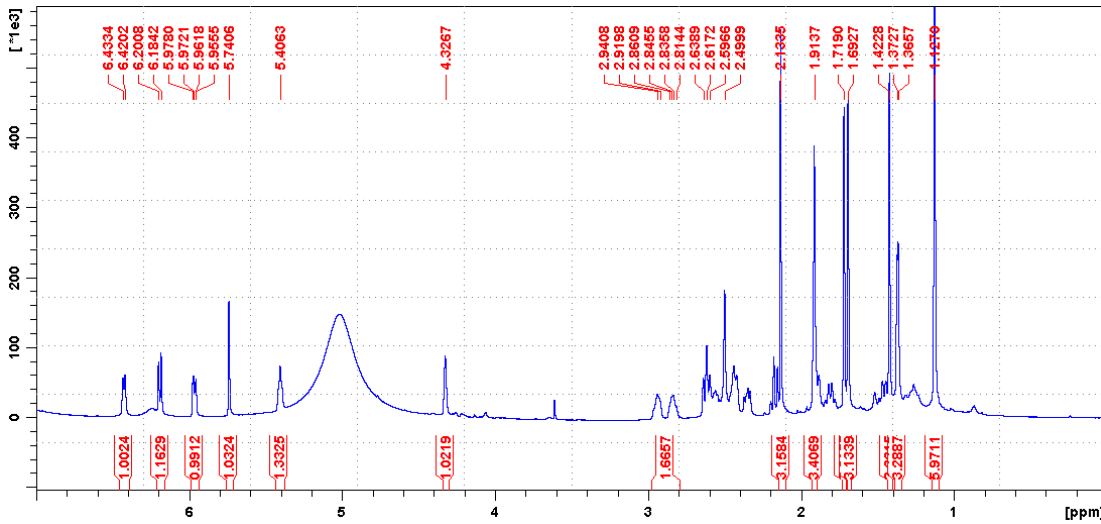

C

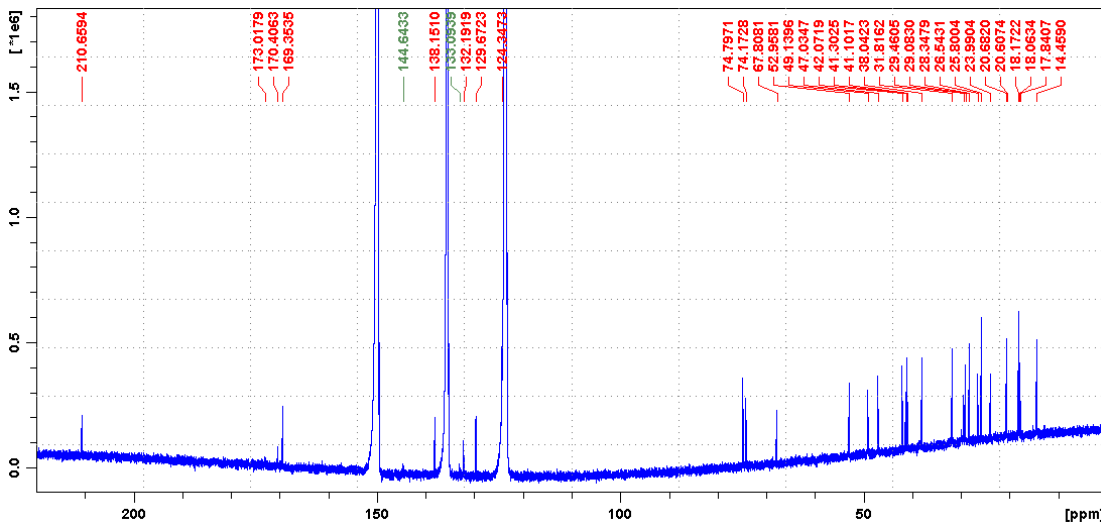

D

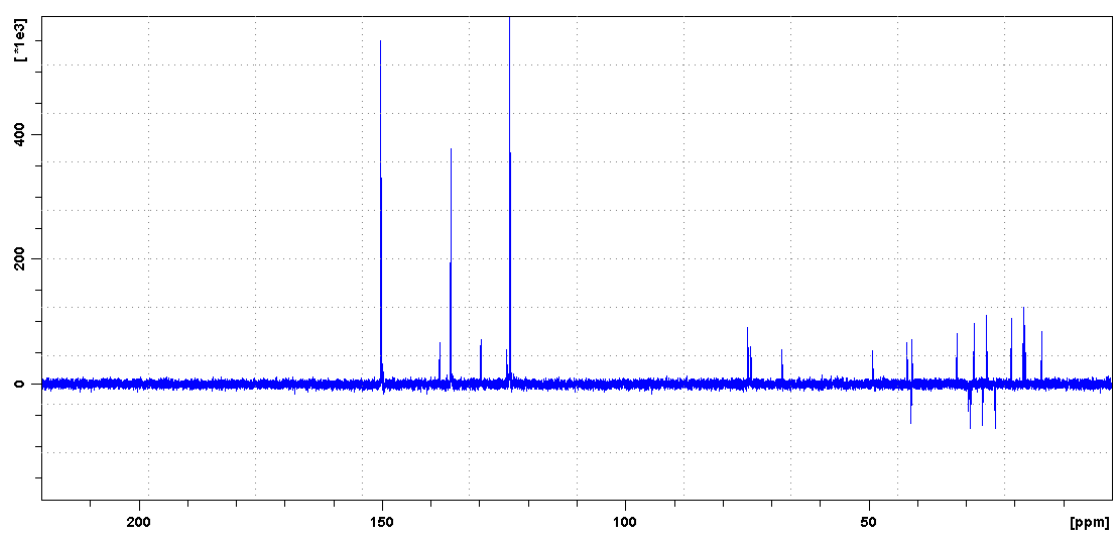

E

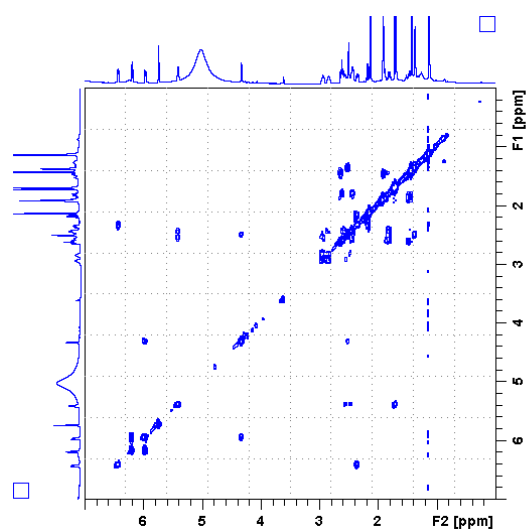

F

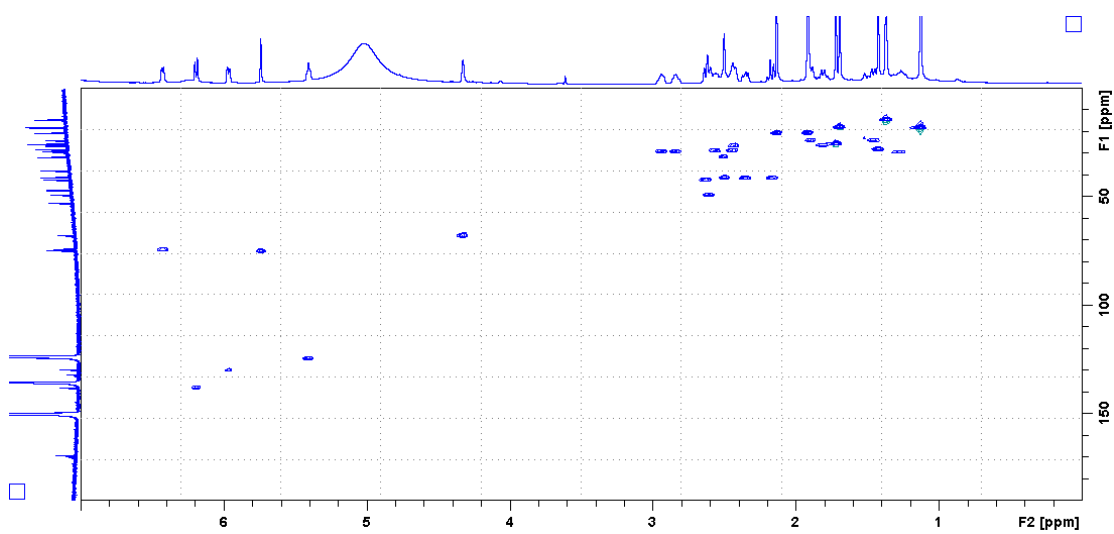

G

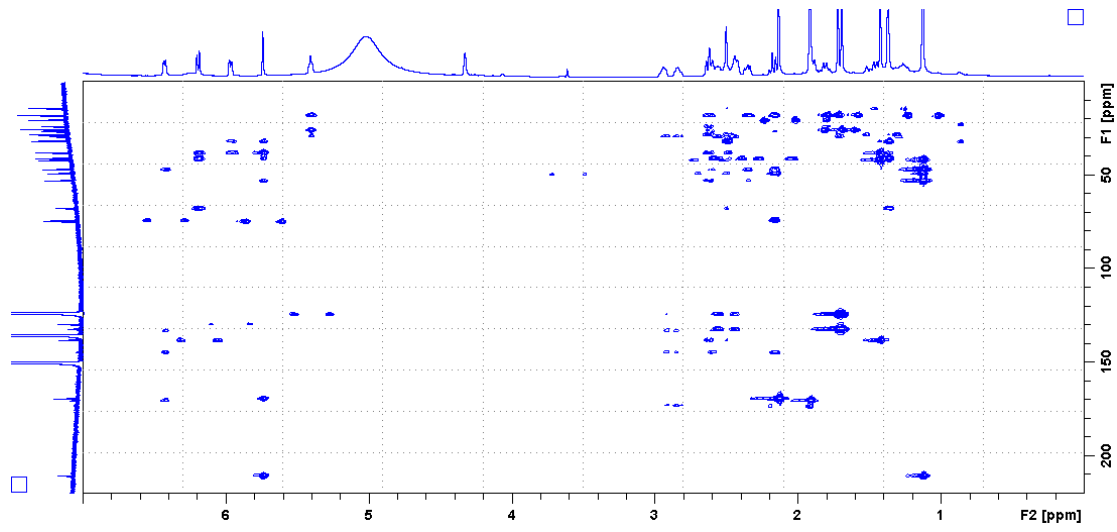

H

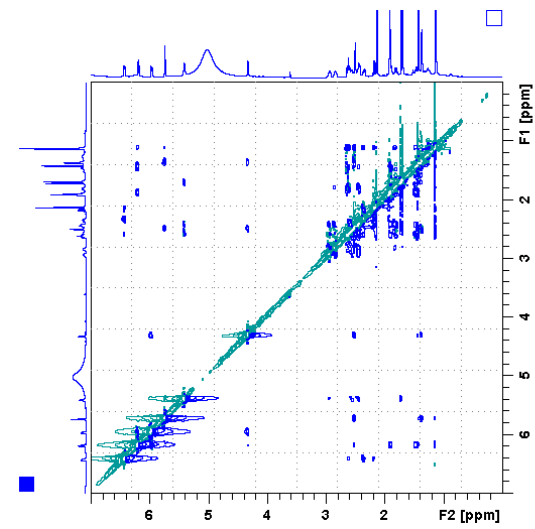

I

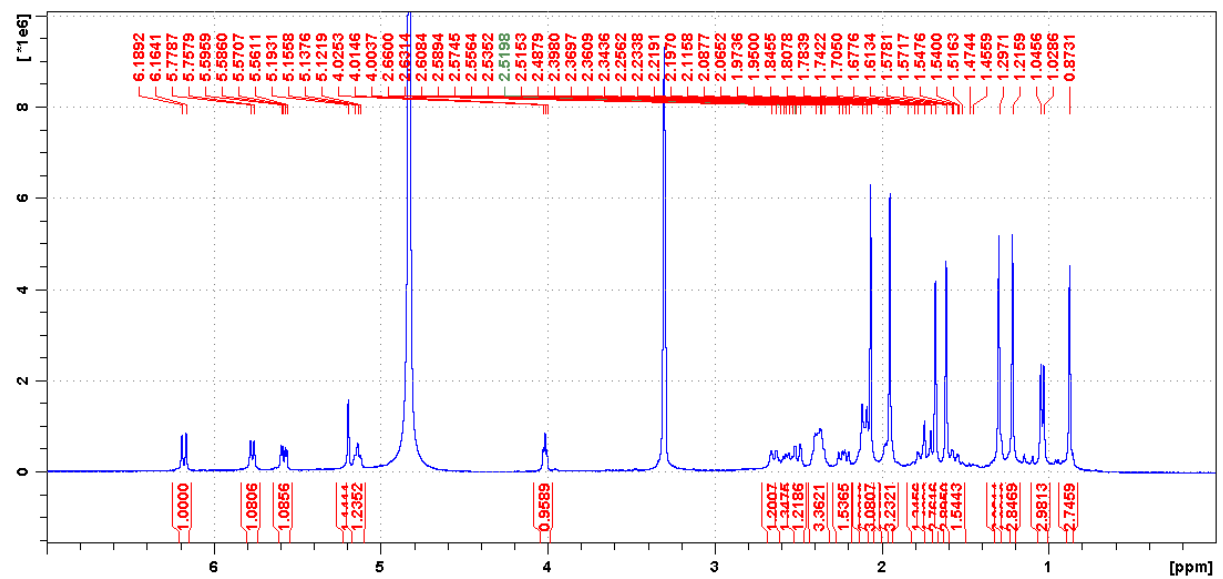

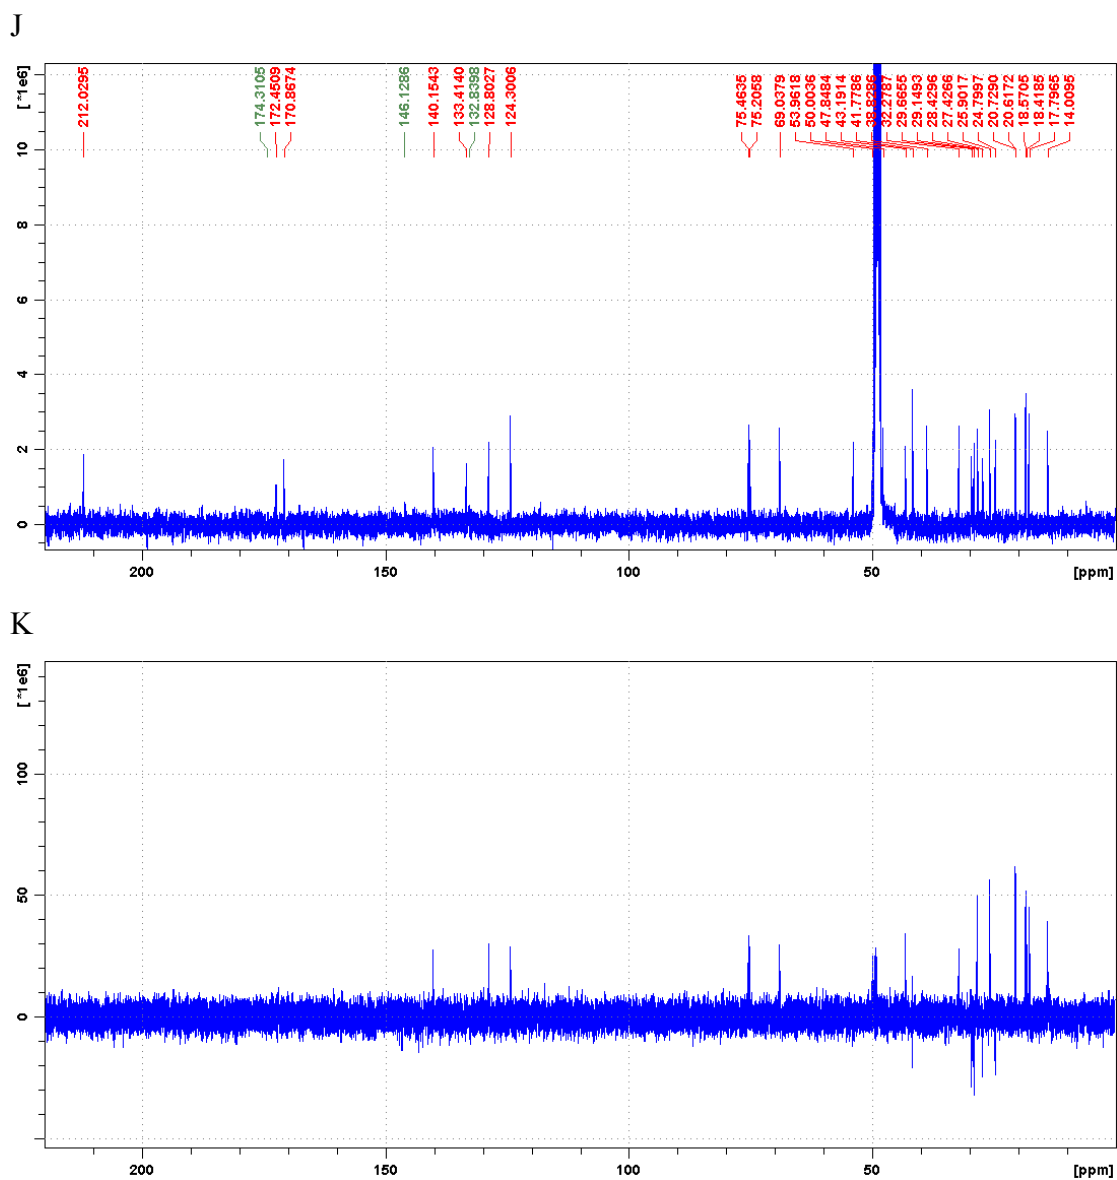

**Figure S54** HRESIMS and NMR spectra of **63**.

(A) HRESIMS spectrum; (B)  $^1\text{H}$  NMR spectrum in pyridine- $d_5$  at 600 MHz; (C)  $^{13}\text{C}$  NMR spectrum in pyridine- $d_5$  at 150 MHz; (D) DEPT 135 spectrum in pyridine- $d_5$  at 150 MHz; (E)  $^1\text{H}$ - $^1\text{H}$  COSY spectrum in pyridine- $d_5$  at 600 MHz; (F) HSQC spectrum in pyridine- $d_5$  at 600 MHz; (G) HMBC spectrum in pyridine- $d_5$  at 600 MHz; (H) ROESY spectrum in pyridine- $d_5$  at 600 MHz; (I)  $^1\text{H}$  NMR spectrum in  $\text{CD}_3\text{OD}$  at 400 MHz; (J)  $^{13}\text{C}$  NMR spectrum in  $\text{CD}_3\text{OD}$  at 100 MHz; (K) DEPT 135 spectrum in  $\text{CD}_3\text{OD}$  at 100 MHz.

A

Monoisotopic Mass, Even Electron Ions  
 248 formula(e) evaluated with 2 results within limits (up to 50 closest results for each mass)  
 Elements Used:  
 C: 0-500 H: 0-1000 O: 0-200 Na: 0-1  
 EB4D2C1-80-7  
 20191118045 228 (1.840)

1: TOF MS ES+  
 1.02e+005

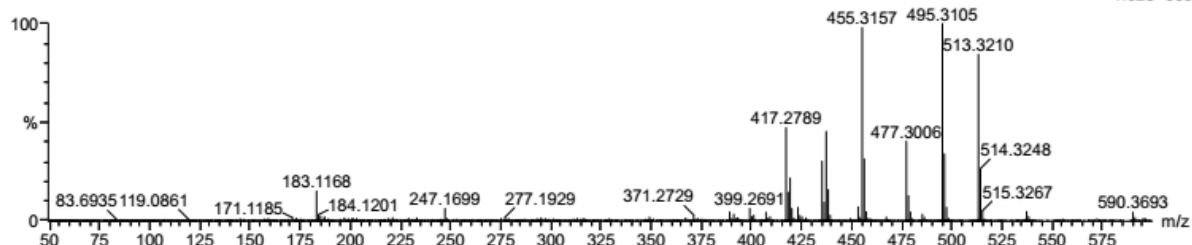

Minimum: -1.5  
 Maximum: 5.0 5.0 50.0

| Mass     | Calc. Mass | mDa  | PPM  | DBE | i-FIT | Norm  | Conf (%) | Formula       |
|----------|------------|------|------|-----|-------|-------|----------|---------------|
| 513.3210 | 513.3216   | -0.6 | -1.2 | 9.5 | 264.4 | 2.362 | 9.42     | C31 H45 O6    |
|          | 513.3192   | 1.8  | 3.5  | 6.5 | 262.2 | 0.099 | 90.58    | C29 H46 O6 Na |

B

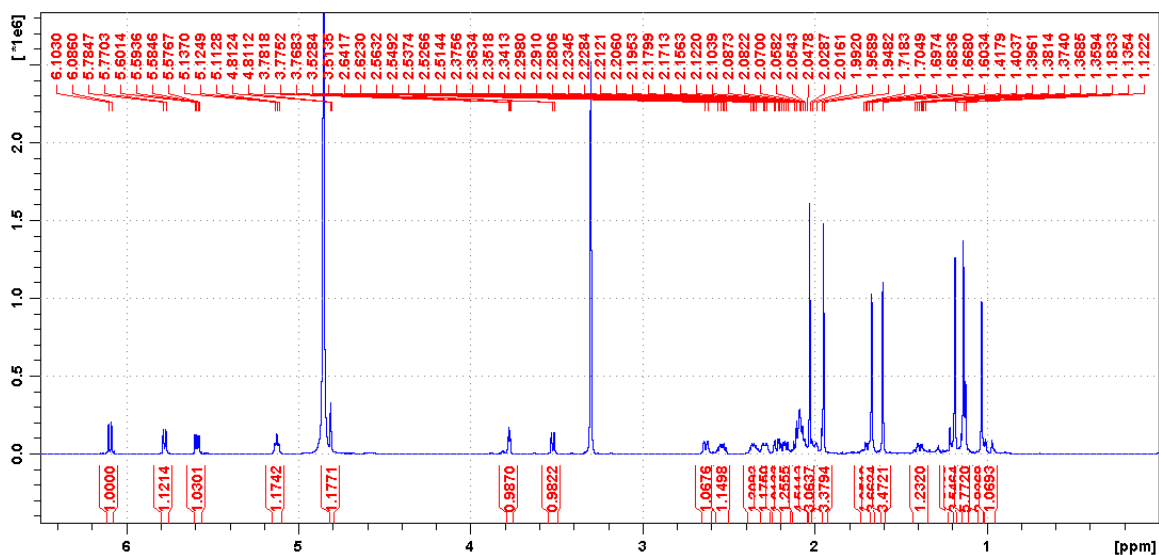

C

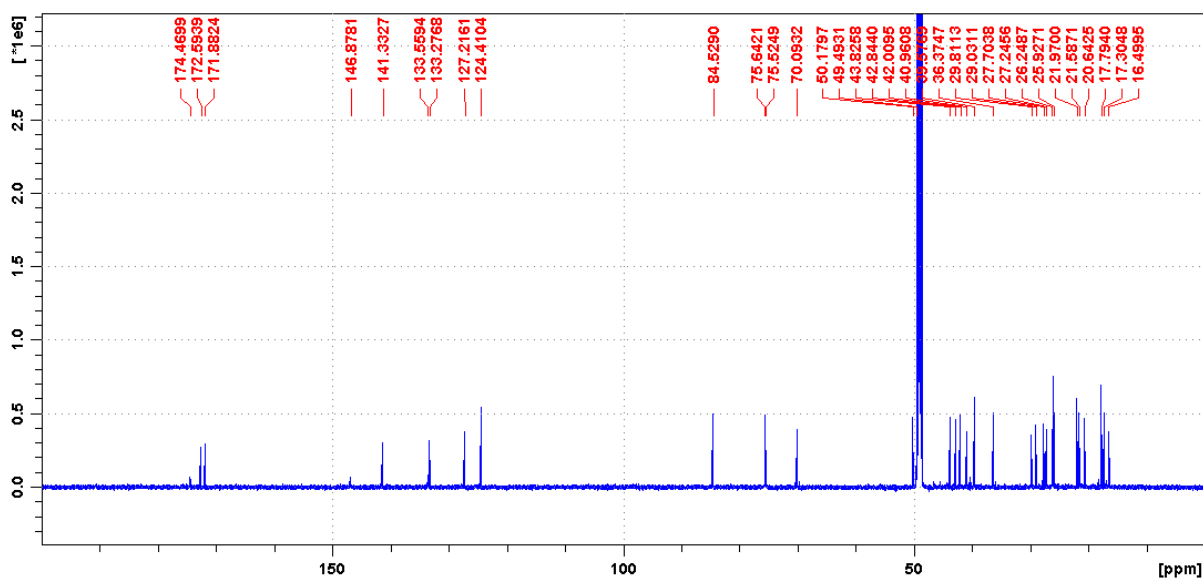

D

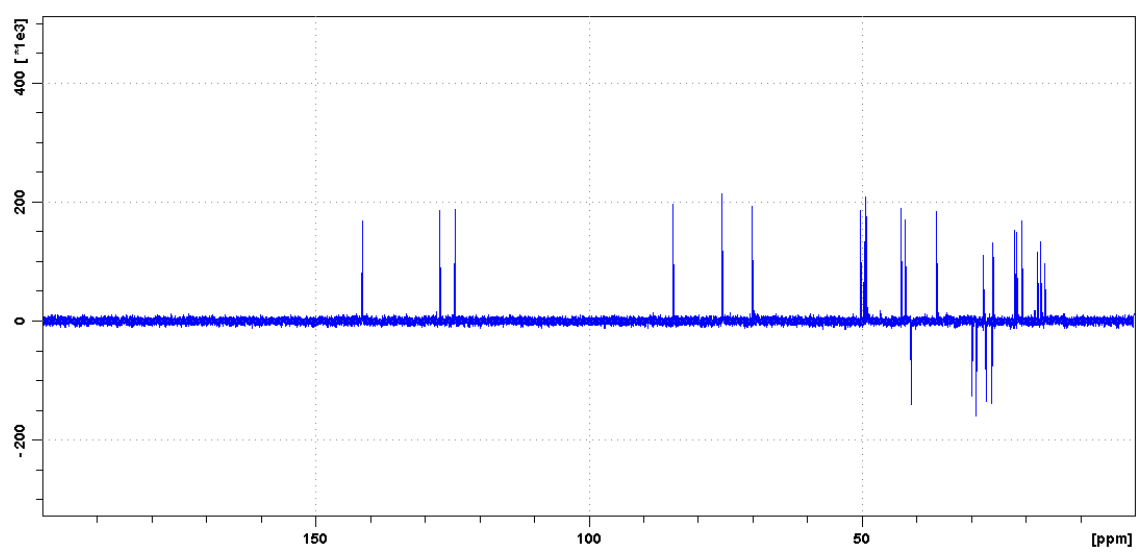

E

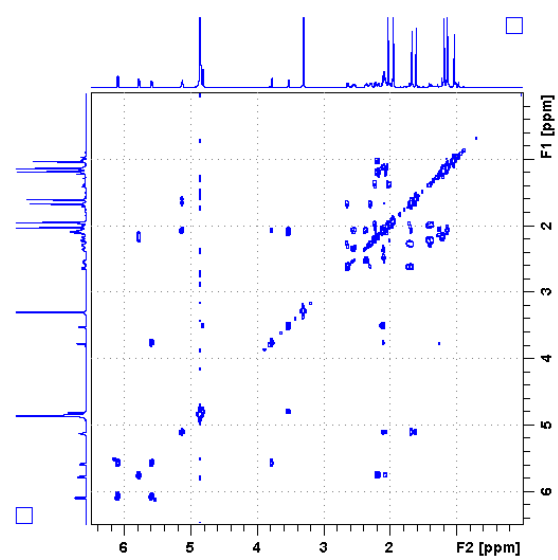

F

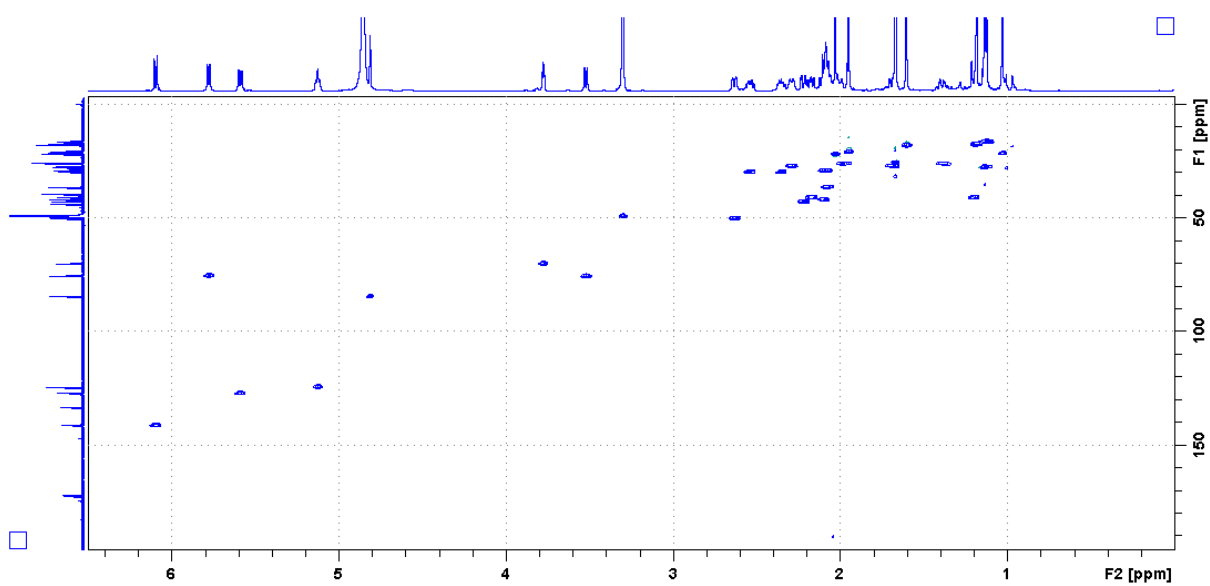



G

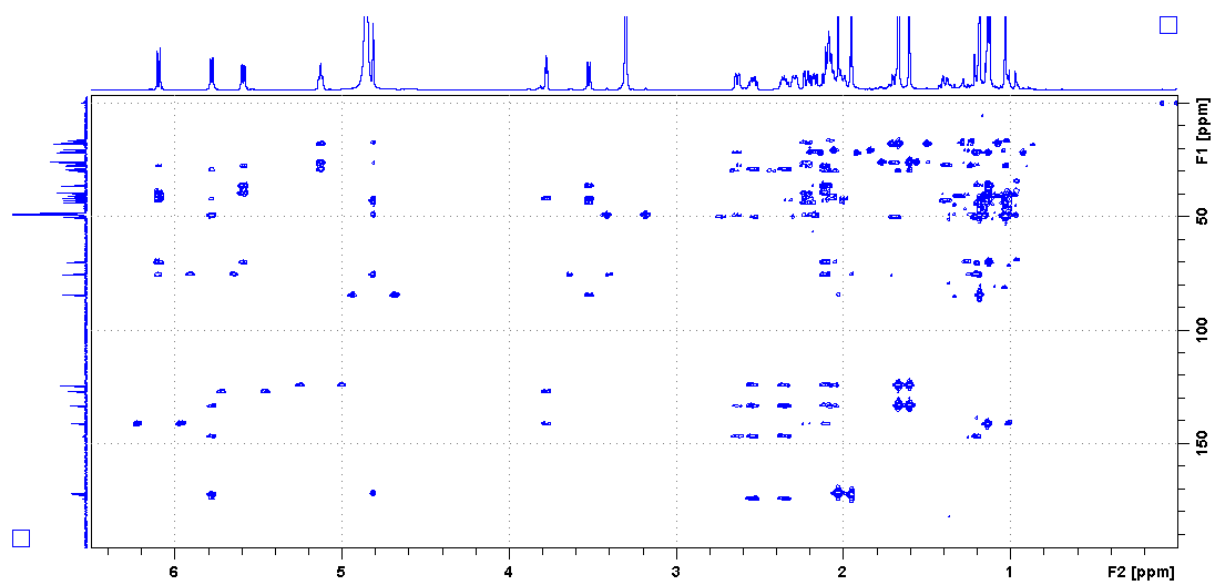

H

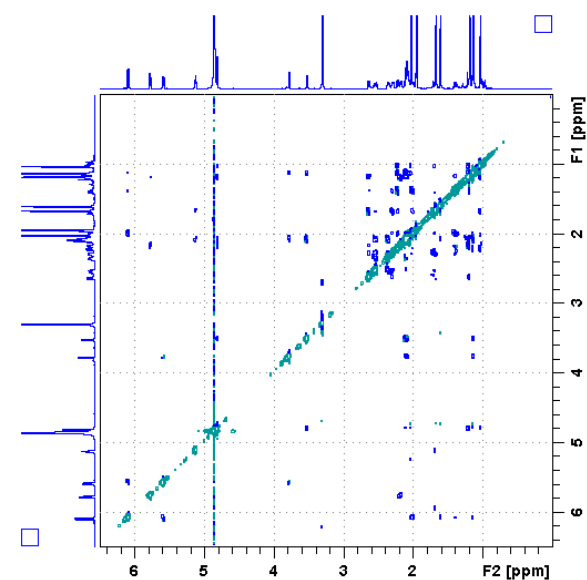

**Figure S55** HRESIMS and NMR spectra of **64**.

(A) HRESIMS spectrum; (B)  $^1\text{H}$  NMR spectrum in  $\text{CD}_3\text{OD}$  at 600 MHz; (C)  $^{13}\text{C}$  NMR spectrum in  $\text{CD}_3\text{OD}$  at 150 MHz; (D) DEPT 135 spectrum in  $\text{CD}_3\text{OD}$  at 150 MHz; (E)  $^1\text{H}$ - $^1\text{H}$  COSY spectrum in  $\text{CD}_3\text{OD}$  at 600 MHz; (F) HSQC spectrum in  $\text{CD}_3\text{OD}$  at 600 MHz; (G) HMBC spectrum in  $\text{CD}_3\text{OD}$  at 600 MHz; (H) ROESY spectrum in  $\text{CD}_3\text{OD}$  at 600 MHz.

A

Monoisotopic Mass, Even Electron Ions  
 321 formula(e) evaluated with 2 results within limits (up to 50 closest results for each mass)  
 Elements Used:  
 C: 0-500 H: 0-1000 O: 0-200 Na: 0-1  
 EB4C1D2-80-8  
 20191118043 242 (1.960)

2: TOF MS ES+  
 7.42e+004

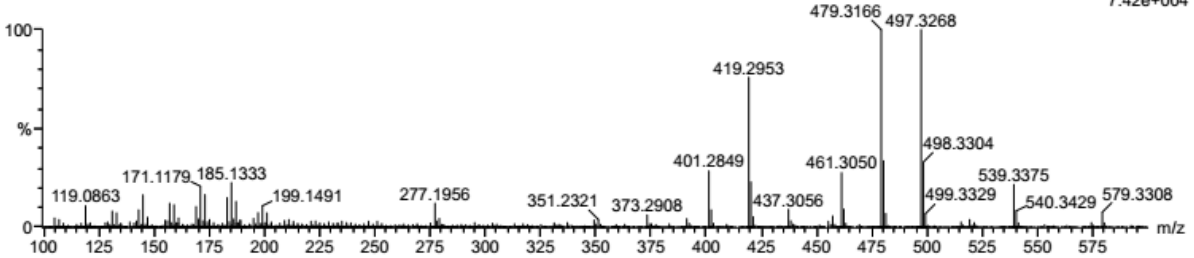

Minimum: -1.5  
 Maximum: 5.0 5.0 50.0

| Mass     | Calc. Mass | mDa  | PPM  | DBE  | i-FIT | Norm  | Conf(%) | Formula       |
|----------|------------|------|------|------|-------|-------|---------|---------------|
| 579.3308 | 579.3298   | 1.0  | 1.7  | 9.5  | 78.9  | 0.592 | 55.33   | C33 H48 O7 Na |
|          | 579.3322   | -1.4 | -2.4 | 12.5 | 79.1  | 0.806 | 44.67   | C35 H47 O7    |

B

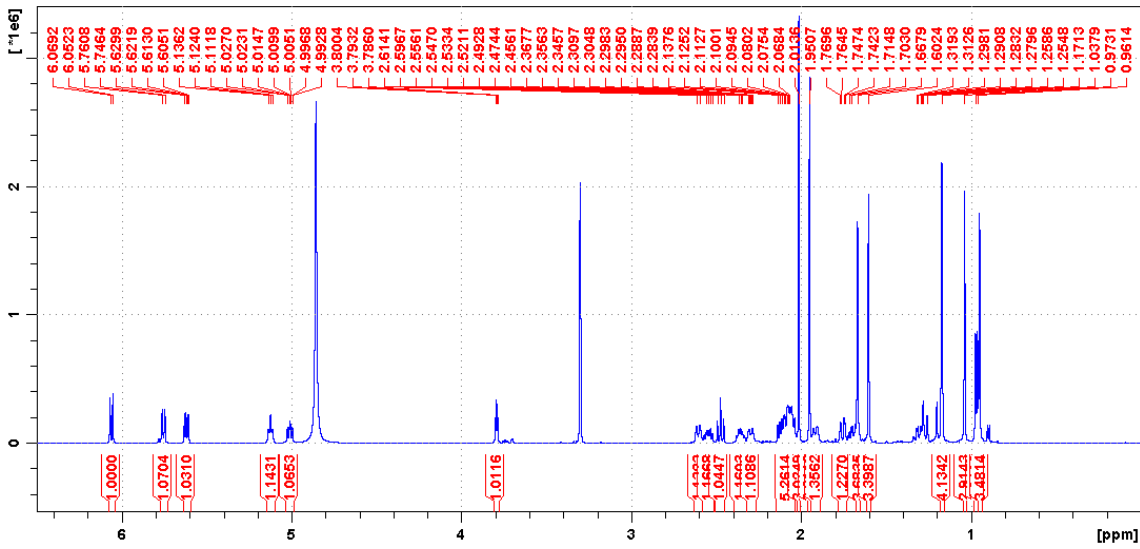

C

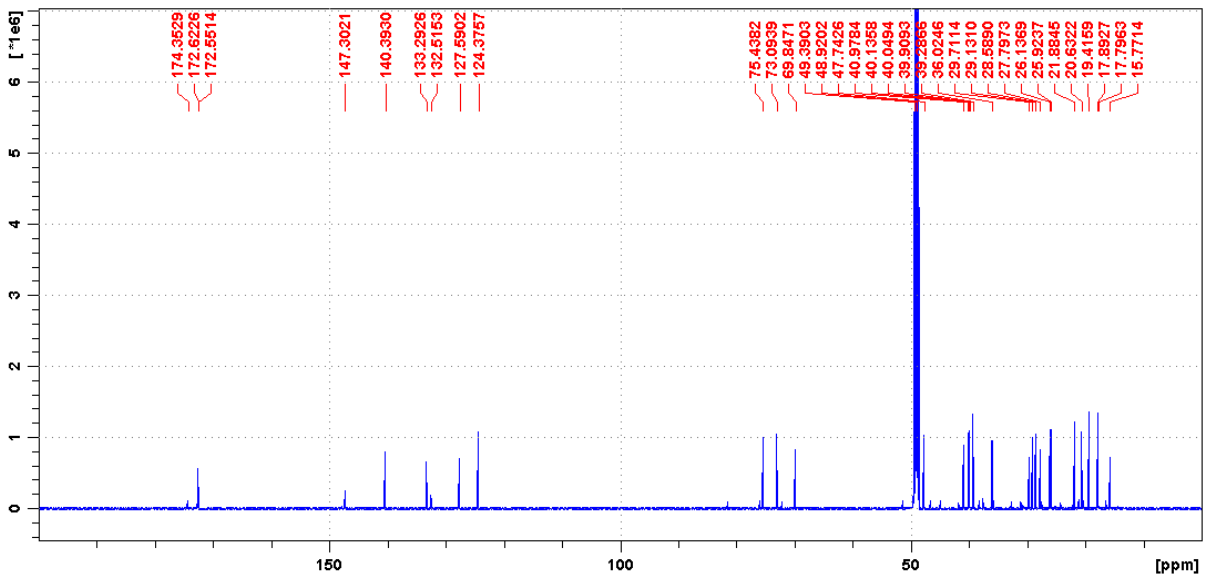

D

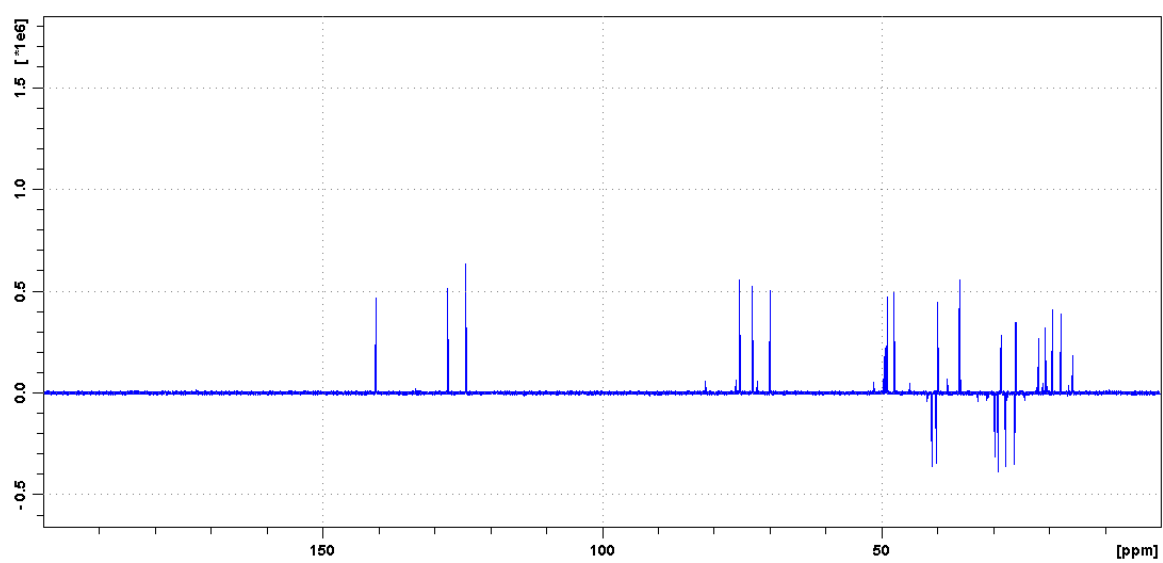

E

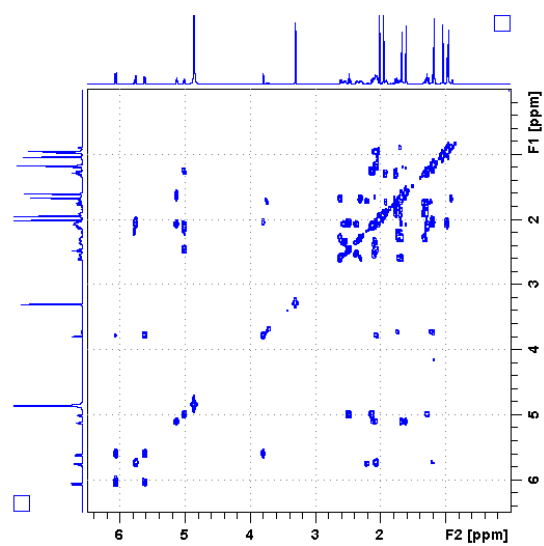

F

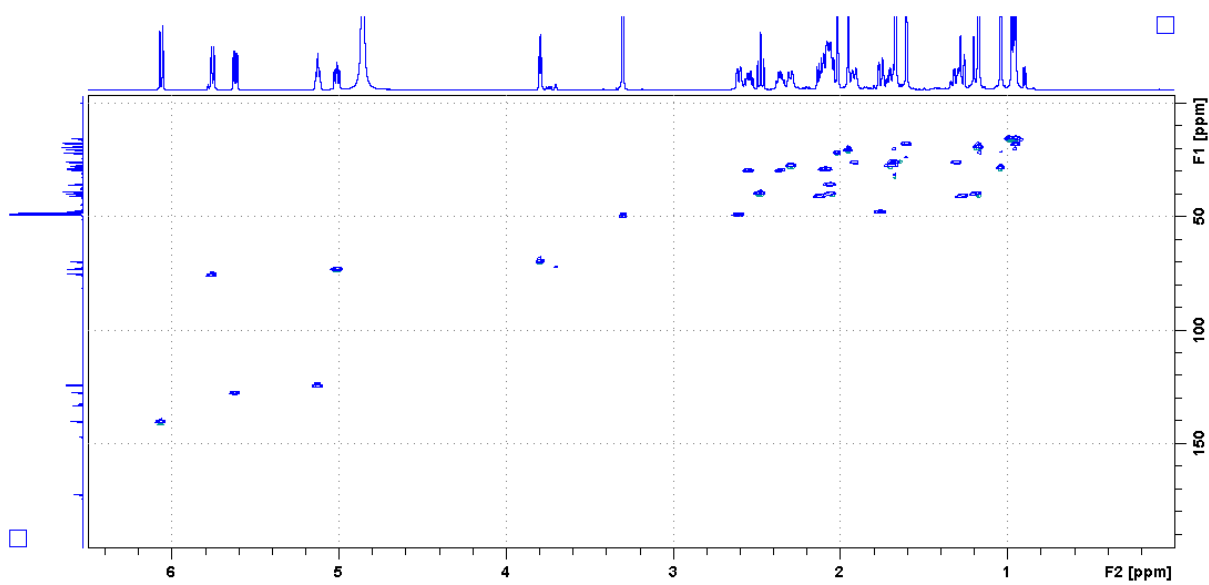

G

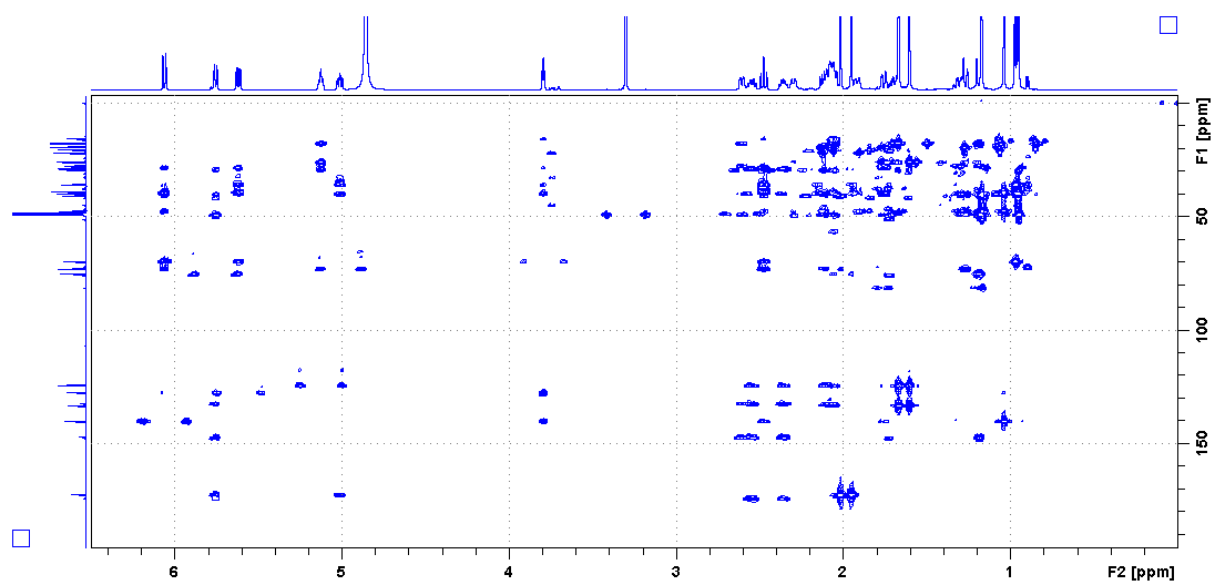

H

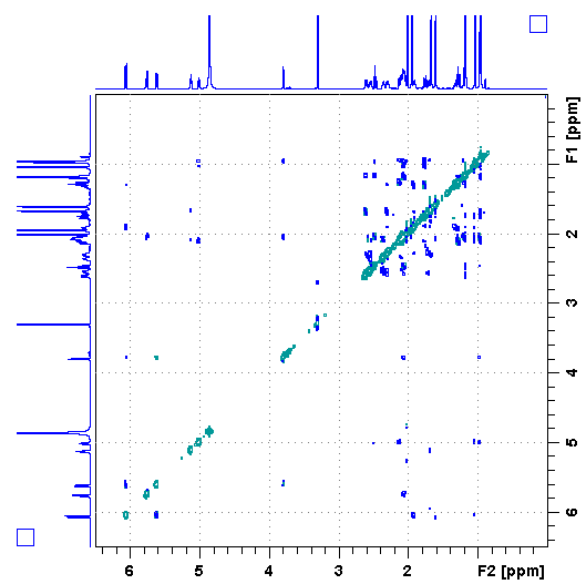

**Figure S56** HRESIMS and NMR spectra of **65**.

(A) HRESIMS spectrum; (B)  $^1\text{H}$  NMR spectrum in  $\text{CD}_3\text{OD}$  at 600 MHz; (C)  $^{13}\text{C}$  NMR spectrum in  $\text{CD}_3\text{OD}$  at 150 MHz; (D) DEPT 135 spectrum in  $\text{CD}_3\text{OD}$  at 150 MHz; (E)  $^1\text{H}$ - $^1\text{H}$  COSY spectrum in  $\text{CD}_3\text{OD}$  at 600 MHz; (F) HSQC spectrum in  $\text{CD}_3\text{OD}$  at 600 MHz; (G) HMBC spectrum in  $\text{CD}_3\text{OD}$  at 600 MHz; (H) ROESY spectrum in  $\text{CD}_3\text{OD}$  at 600 MHz.

A

Monoisotopic Mass, Even Electron Ions  
 298 formula(e) evaluated with 2 results within limits (up to 50 closest results for each mass)  
 Elements Used:  
 C: 0-200 H: 0-1000 O: 0-200 Na: 0-1  
 EB4C1D2-80-6  
 20191118044 248 (2.001)

1: TOF MS ES+  
 4.42e+005

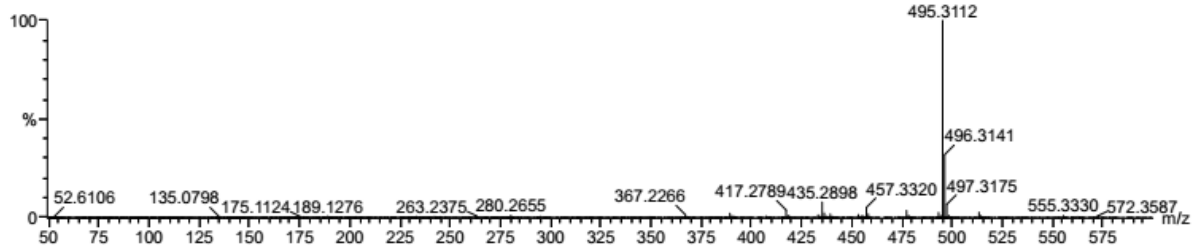

Minimum: -1.5  
 Maximum: 5.0 5.0 50.0

| Mass     | Calc. Mass | mDa  | PPM  | DBE  | i-FIT | Norm  | Conf (%) | Formula        |
|----------|------------|------|------|------|-------|-------|----------|----------------|
| 555.3330 | 555.3322   | 0.8  | 1.4  | 10.5 | 88.0  | 0.161 | 85.09    | C33 H47 O7     |
|          | 555.3356   | -2.6 | -4.7 | -1.5 | 89.8  | 1.903 | 14.91    | C24 H52 O12 Na |

B

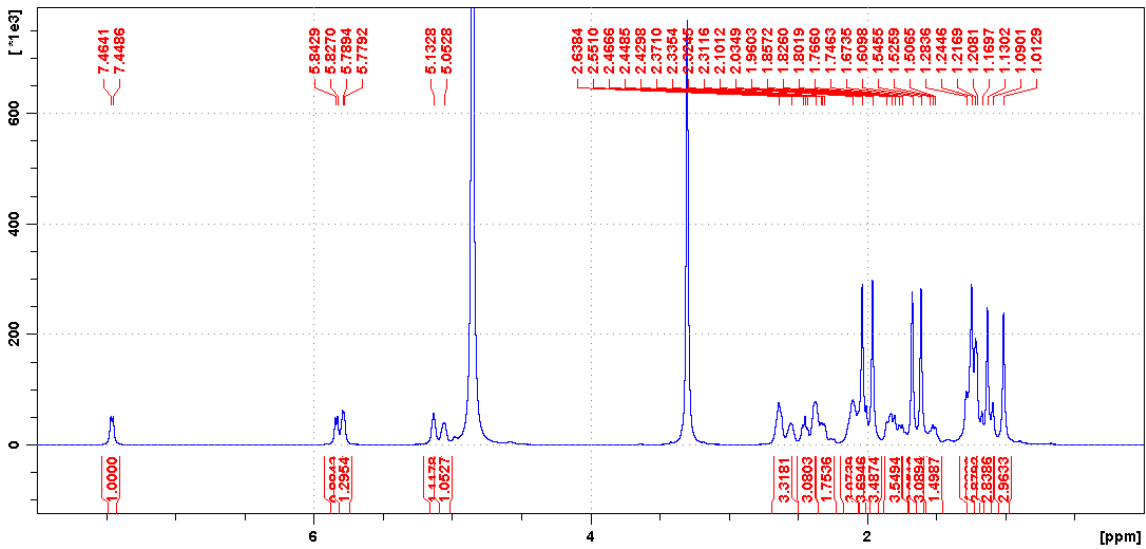

C

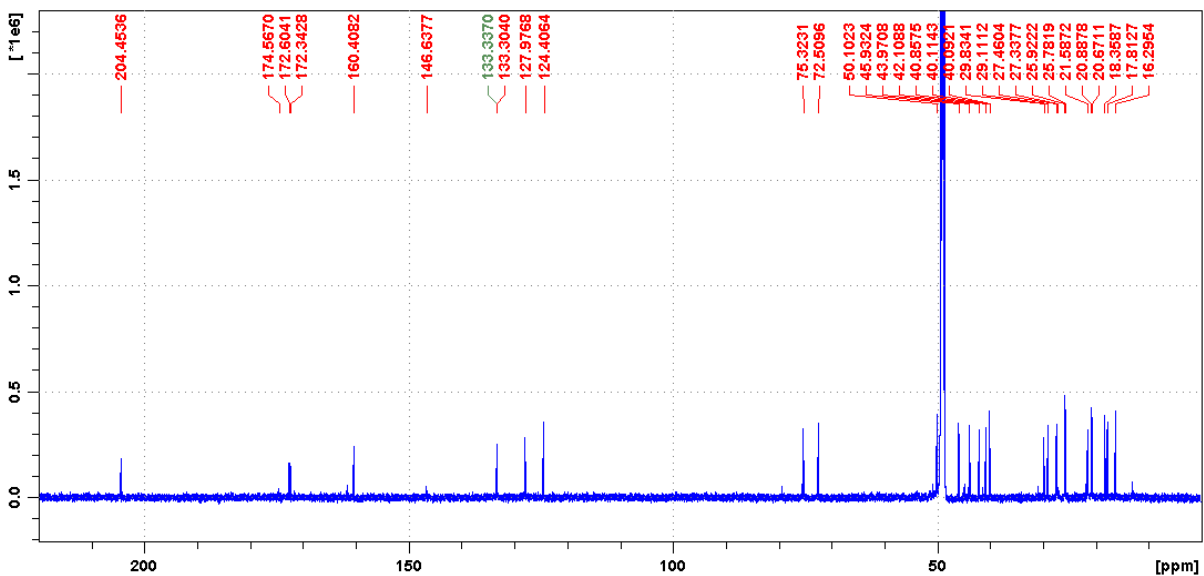

D

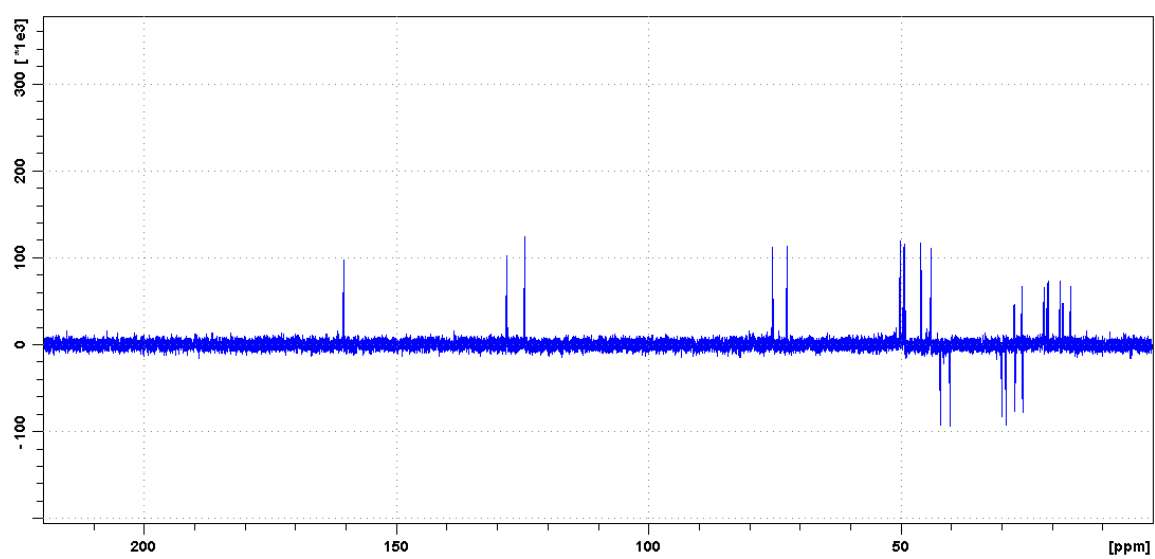

E

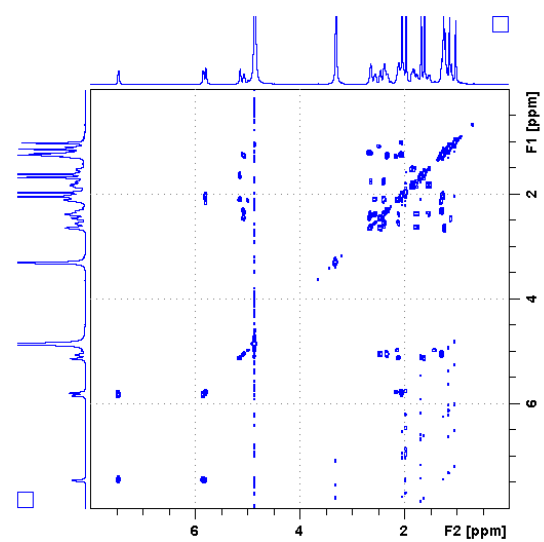

F

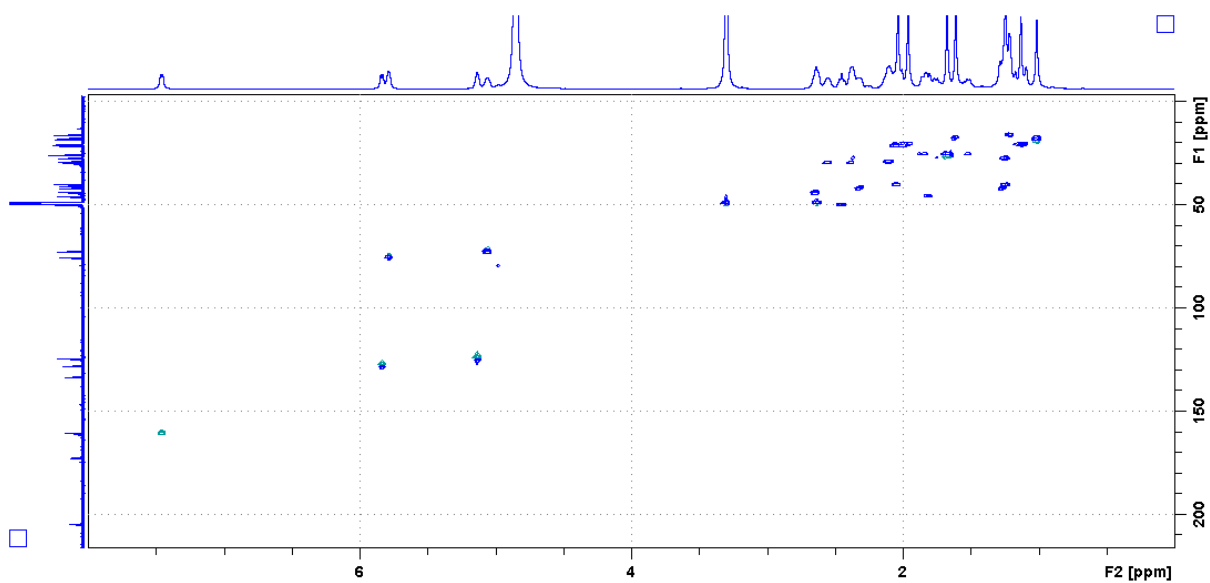

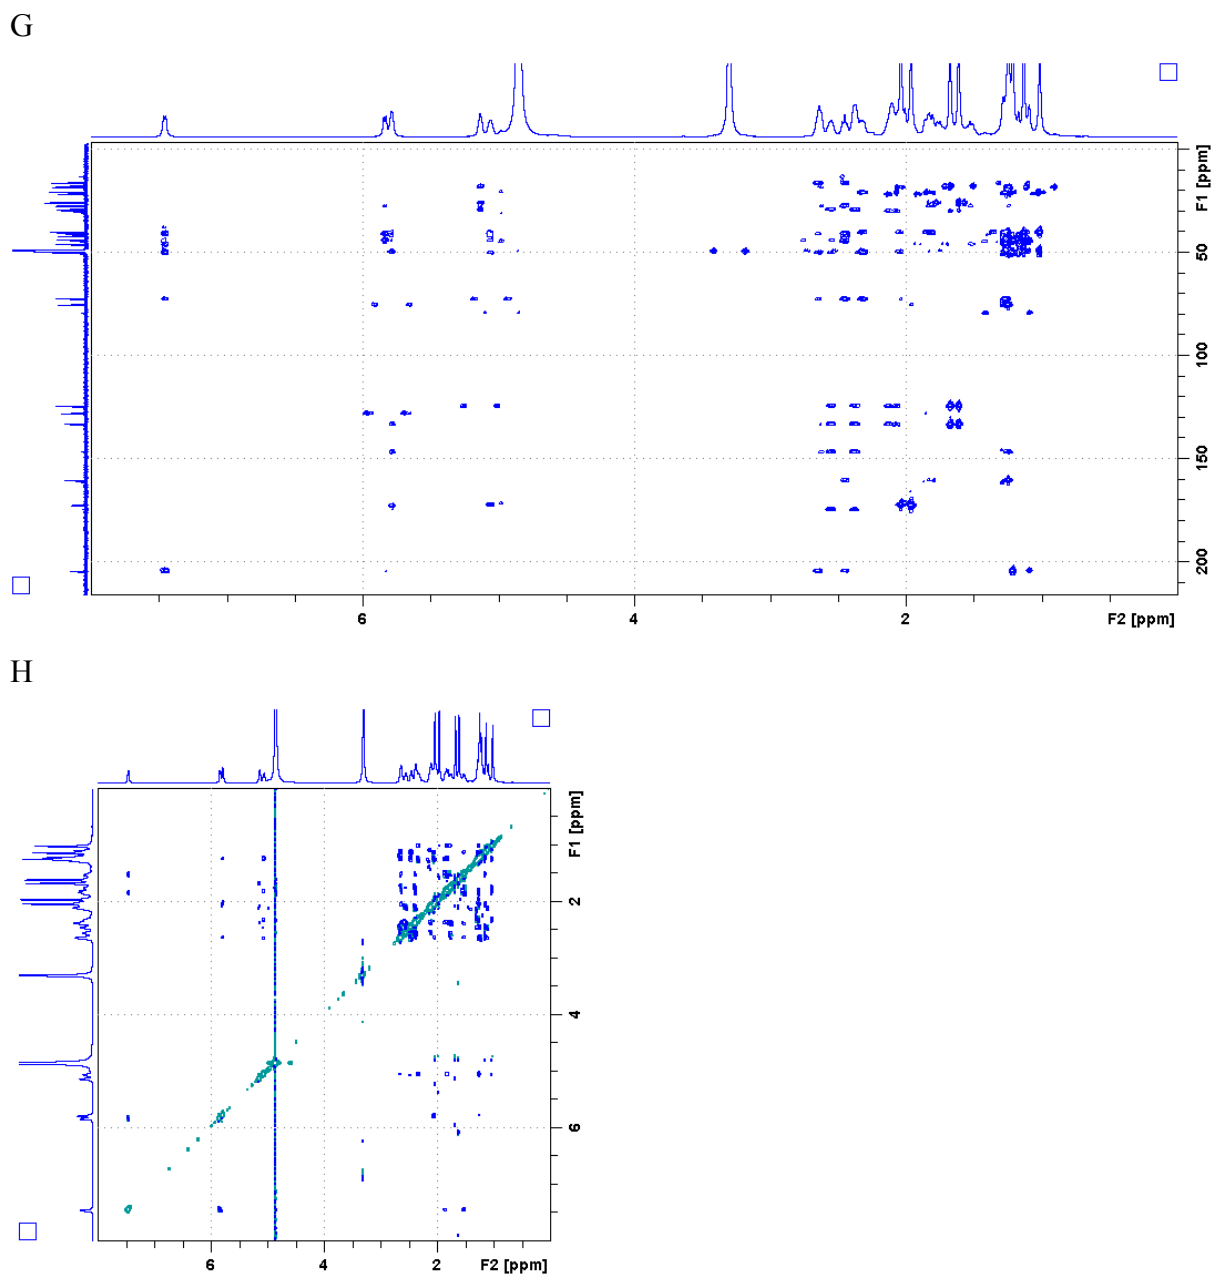

**Figure S57** HRESIMS and NMR spectra of **66**.

(A) HRESIMS spectrum; (B)  $^1\text{H}$  NMR spectrum in  $\text{CD}_3\text{OD}$  at 600 MHz; (C)  $^{13}\text{C}$  NMR spectrum in  $\text{CD}_3\text{OD}$  at 150 MHz; (D) DEPT 135 spectrum in  $\text{CD}_3\text{OD}$  at 150 MHz; (E)  $^1\text{H}$ - $^1\text{H}$  COSY spectrum in  $\text{CD}_3\text{OD}$  at 600 MHz; (F) HSQC spectrum in  $\text{CD}_3\text{OD}$  at 600 MHz; (G) HMBC spectrum in  $\text{CD}_3\text{OD}$  at 600 MHz; (H) ROESY spectrum in  $\text{CD}_3\text{OD}$  at 600 MHz.

A

Monoisotopic Mass, Even Electron Ions  
 328 formula(e) evaluated with 2 results within limits (up to 50 closest results for each mass)  
 Elements Used:  
 C: 0-500 H: 0-1000 O: 0-200 Na: 0-1  
 B1B4-C1D2-80-2  
 20190923031 225 (1.817)

1: TOF MS ES+  
 1.37e+004

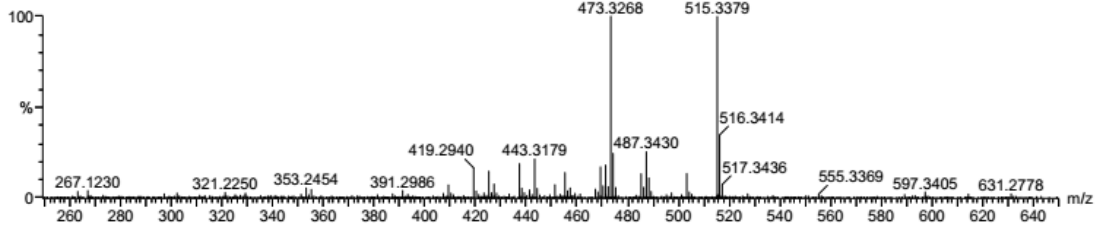

Minimum: -1.5  
 Maximum: 5.0 5.0 50.0

| Mass     | Calc. Mass | mDa  | PPM  | DBE  | i-FIT | Norm  | Conf(%) | Formula       |
|----------|------------|------|------|------|-------|-------|---------|---------------|
| 597.3405 | 597.3403   | 0.2  | 0.3  | 8.5  | 52.6  | 0.737 | 47.84   | C33 H50 O8 Na |
|          | 597.3427   | -2.2 | -3.7 | 11.5 | 52.5  | 0.651 | 52.16   | C35 H49 O8    |

B

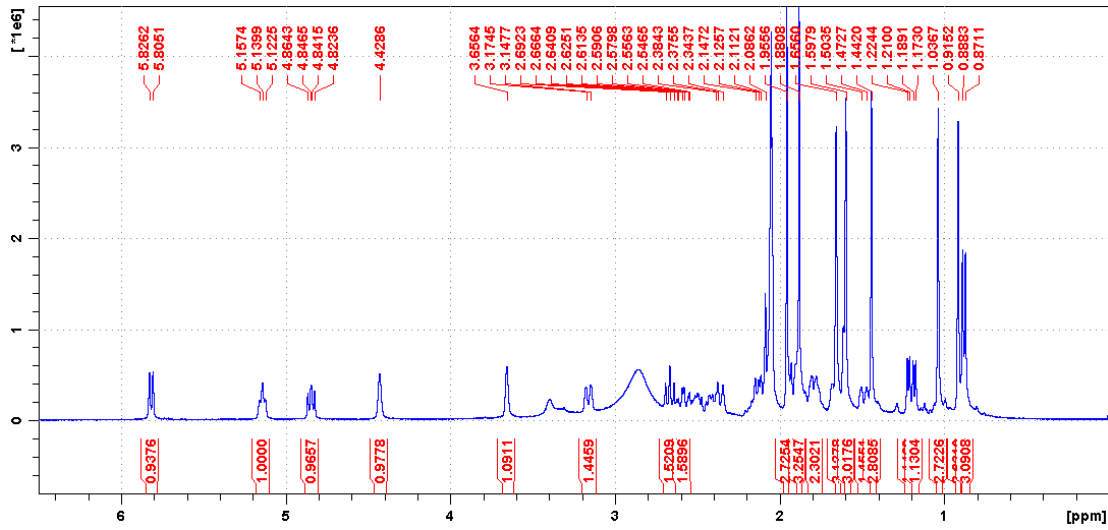

C

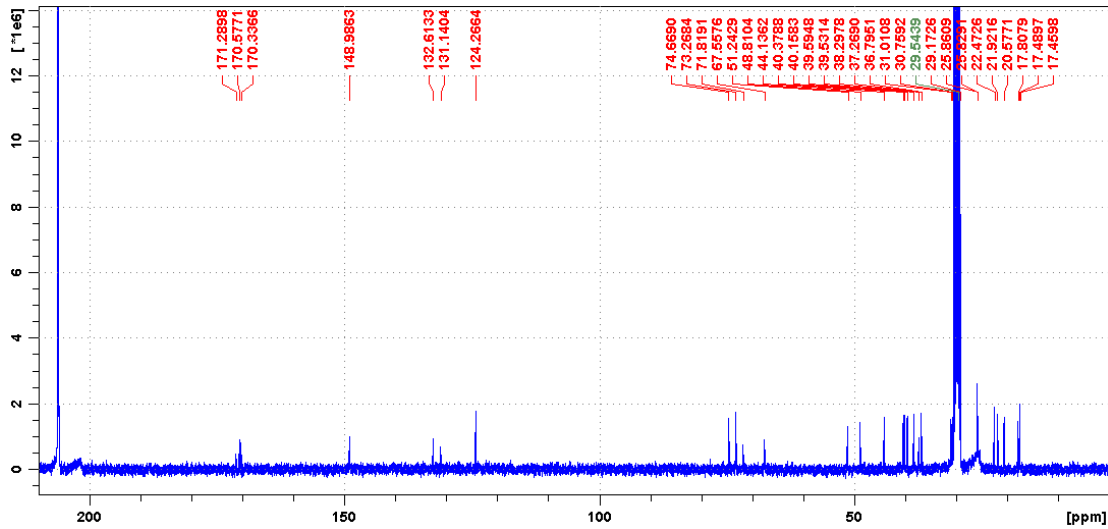



D

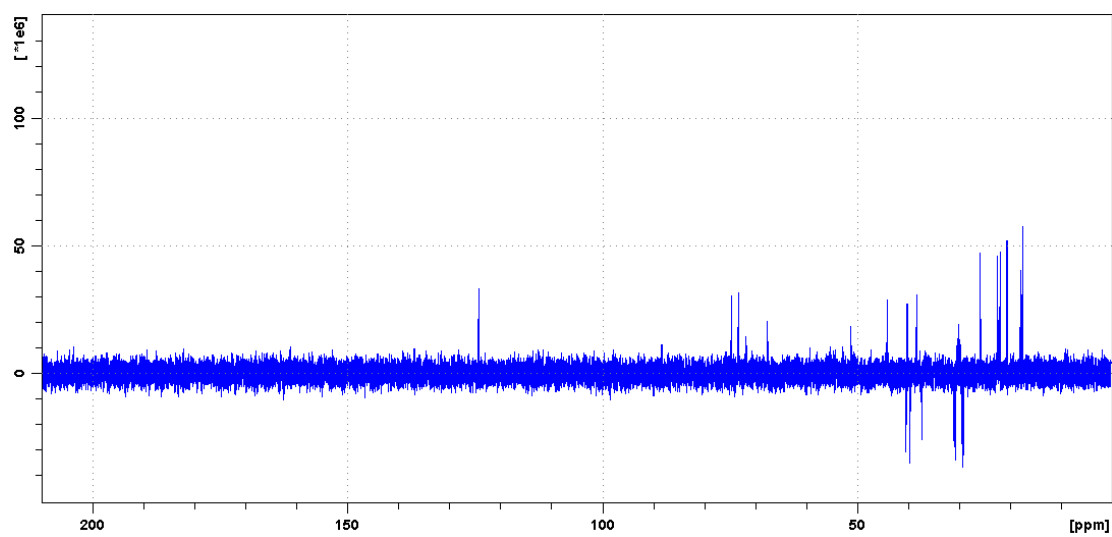

E

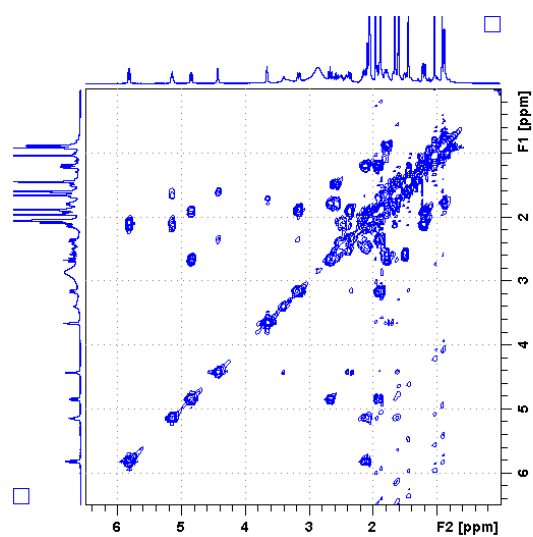

F

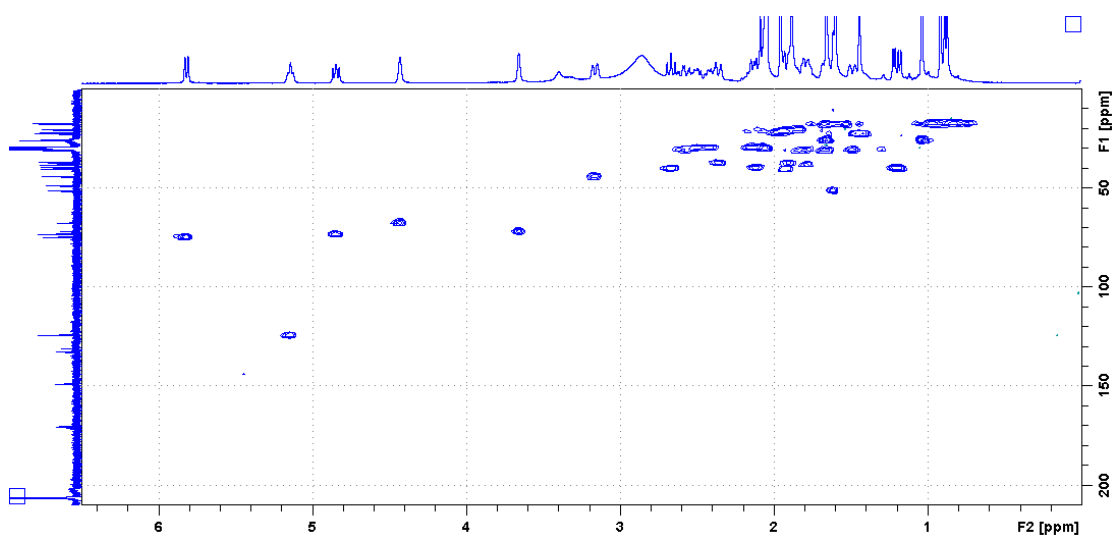

G

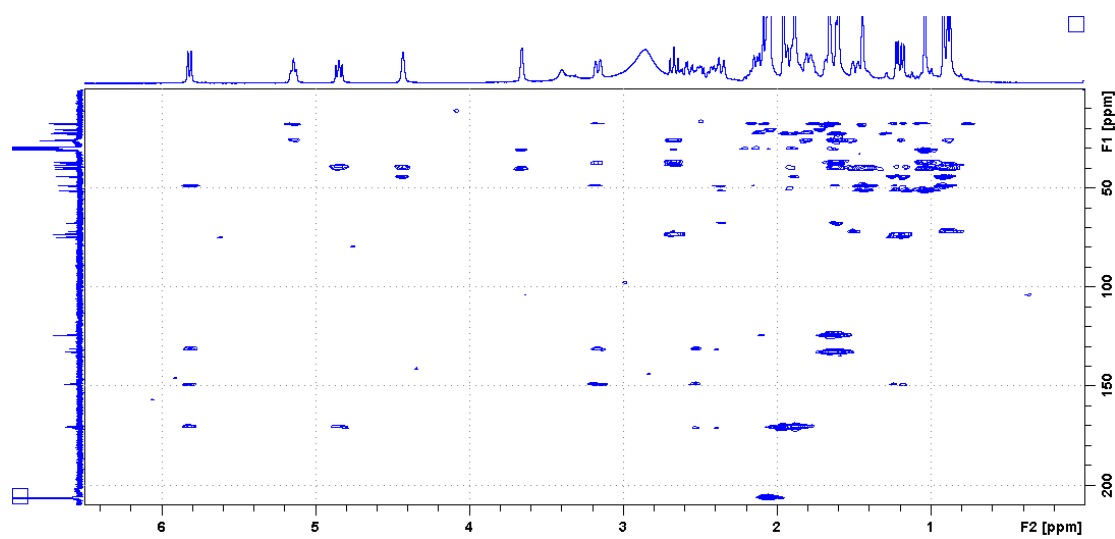

H

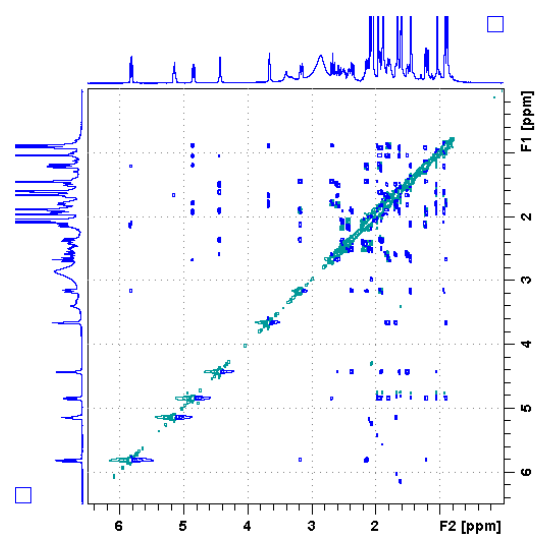

**Figure S58** HRESIMS and NMR spectra of **67**.

(A) HRESIMS spectrum; (B)  $^1\text{H}$  NMR spectrum in acetone- $d_6$  at 400 MHz; (C)  $^{13}\text{C}$  NMR spectrum in acetone- $d_6$  at 100 MHz; (D) DEPT 135 spectrum in acetone- $d_6$  at 100 MHz; (E)  $^1\text{H}$ - $^1\text{H}$  COSY spectrum in acetone- $d_6$  at 400 MHz; (F) HSQC spectrum in acetone- $d_6$  at 400 MHz; (G) HMBC spectrum in acetone- $d_6$  at 400 MHz; (H) ROESY spectrum in acetone- $d_6$  at 400 MHz.

A

Monoisotopic Mass, Even Electron Ions  
 353 formula(e) evaluated with 2 results within limits (up to 50 closest results for each mass)  
 Elements Used:  
 C: 0-500 H: 0-1000 O: 0-200 Na: 0-1  
 56  
 20190107\_60 218 (1.765)

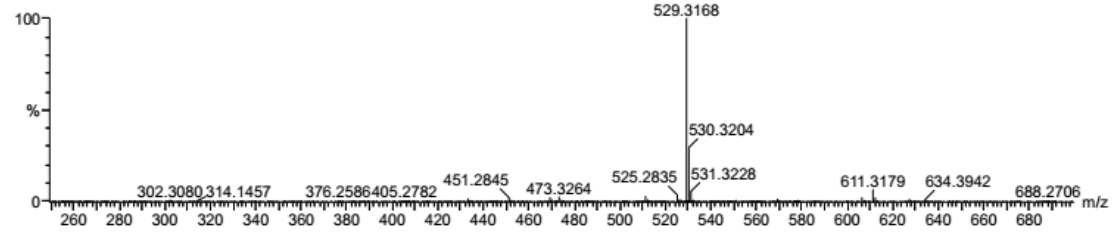

1: TOF MS ES+  
6.63e+004

Minimum: -1.5  
 Maximum: 5.0 5.0 50.0

| Mass     | Calc. Mass | mDa  | PPM  | DBE  | i-FIT | Norm  | Conf (%) | Formula       |
|----------|------------|------|------|------|-------|-------|----------|---------------|
| 611.3179 | 611.3196   | -1.7 | -2.8 | 9.5  | 50.9  | 0.023 | 97.77    | C33 H48 O9 Na |
|          | 611.3161   | 1.8  | 2.9  | 21.5 | 54.6  | 3.804 | 2.23     | C42 H43 O4    |

B

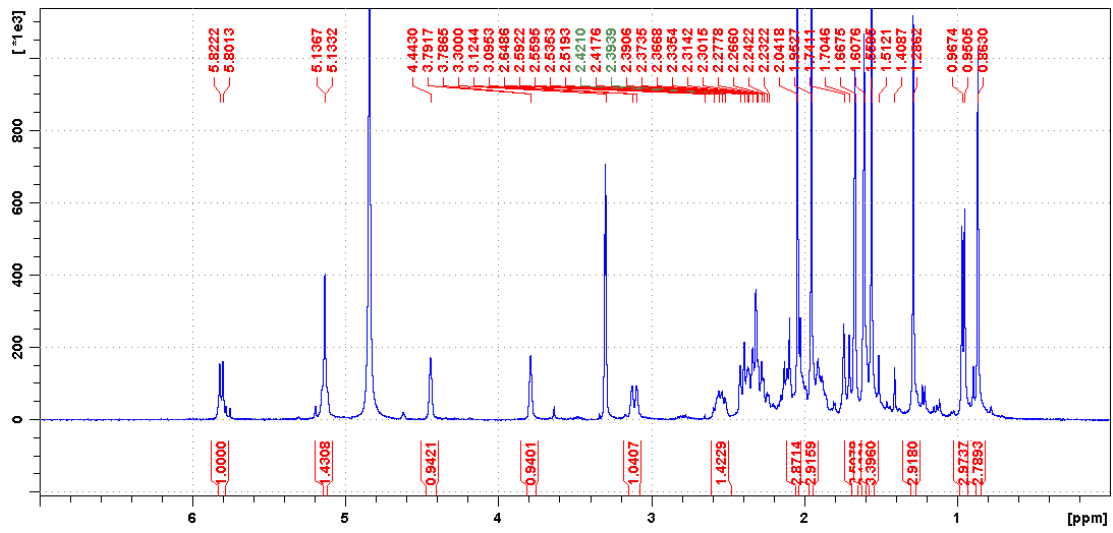

C

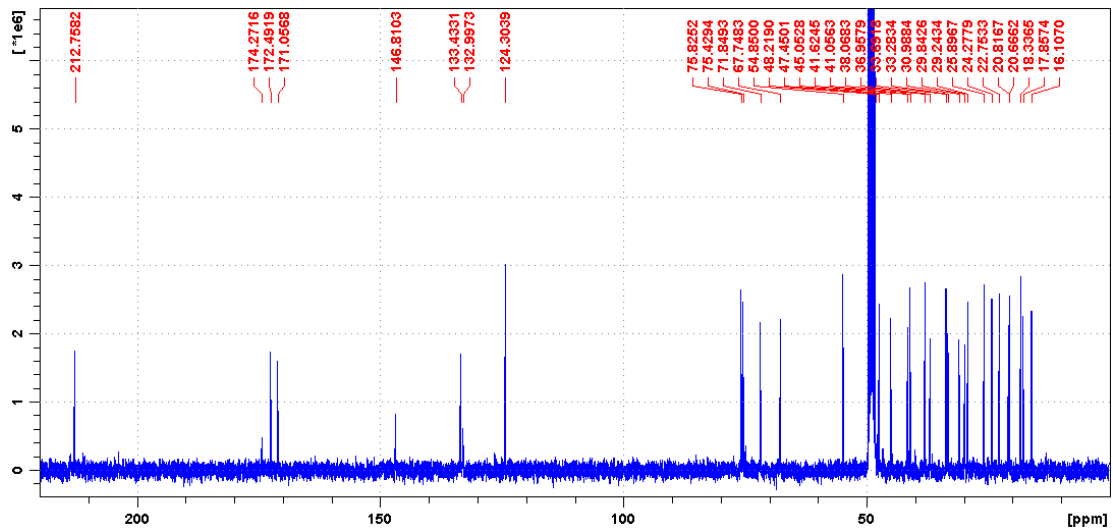

D

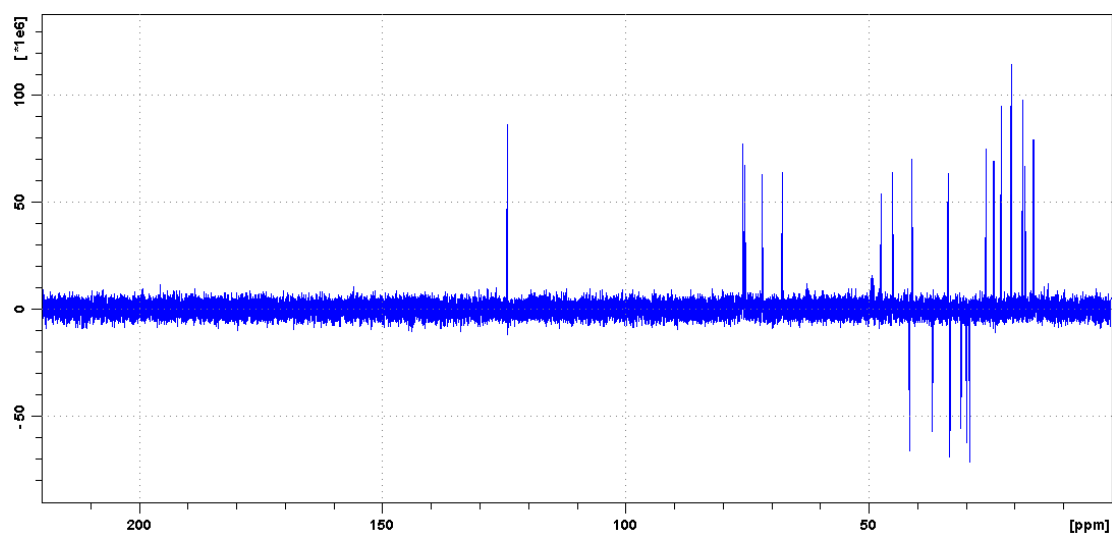

E

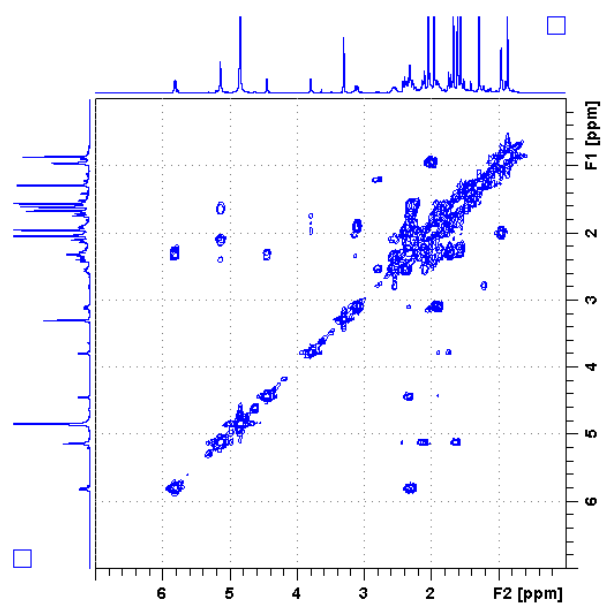

F

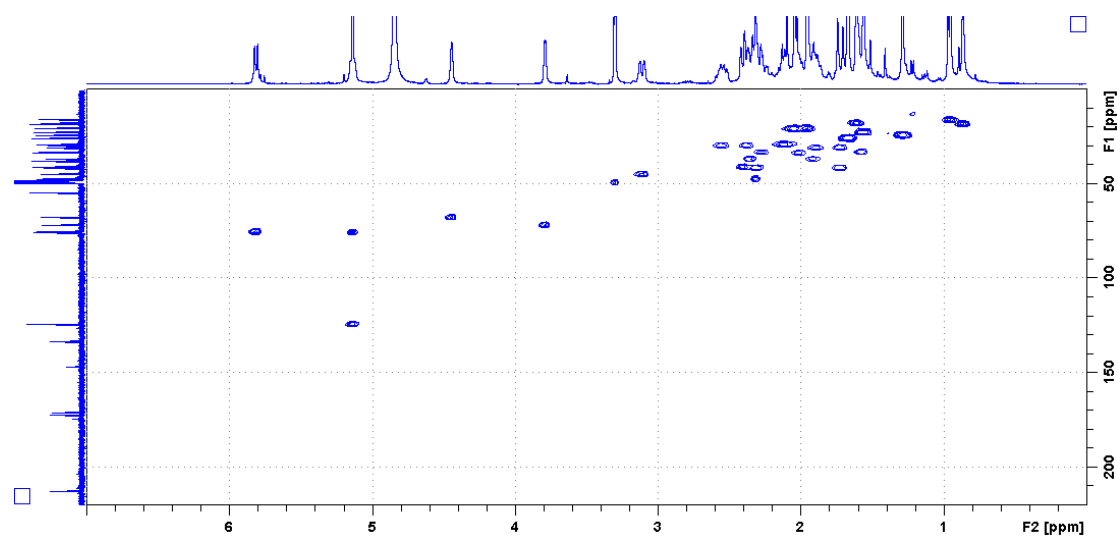

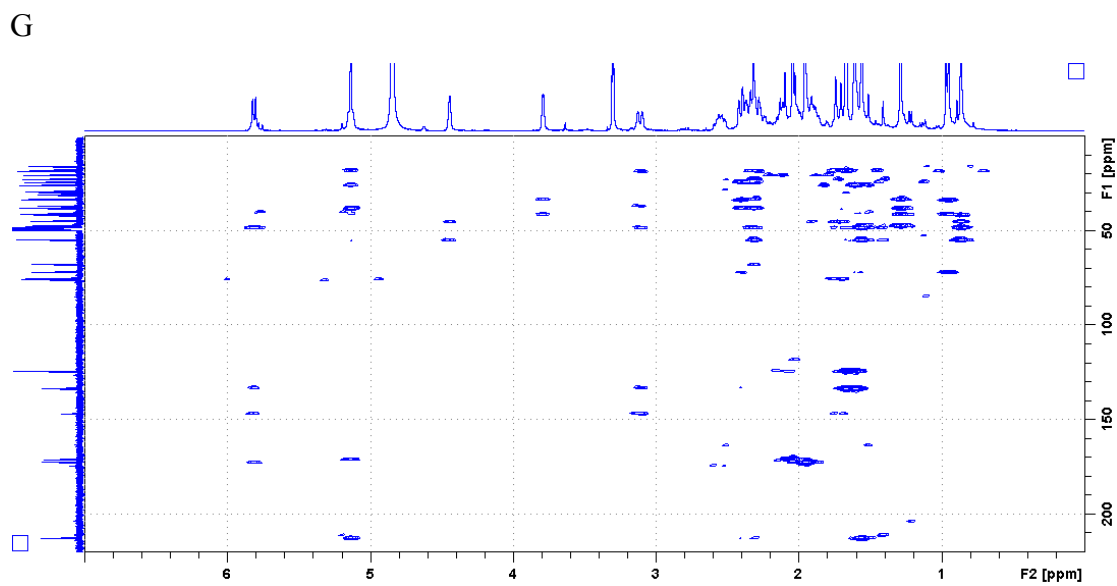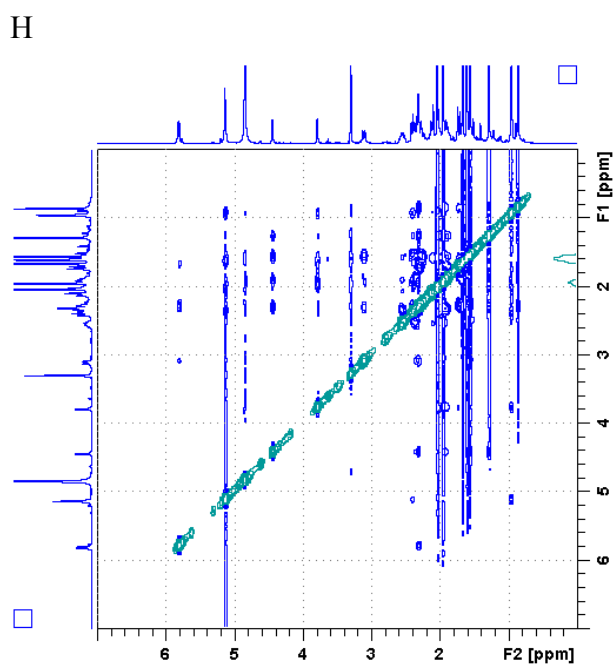

**Figure S59** HRESIMS and NMR spectra of **68**.

(A) HRESIMS spectrum; (B)  $^1\text{H}$  NMR spectrum in  $\text{CD}_3\text{OD}$  at 400 MHz; (C)  $^{13}\text{C}$  NMR spectrum in  $\text{CD}_3\text{OD}$  at 100 MHz; (D) DEPT 135 spectrum in  $\text{CD}_3\text{OD}$  at 100 MHz; (E)  $^1\text{H}$ - $^1\text{H}$  COSY spectrum in  $\text{CD}_3\text{OD}$  at 400 MHz; (F) HSQC spectrum in  $\text{CD}_3\text{OD}$  at 400 MHz; (G) HMBC spectrum in  $\text{CD}_3\text{OD}$  at 400 MHz; (H) ROESY spectrum in  $\text{CD}_3\text{OD}$  at 400 MHz.

A

Monoisotopic Mass, Even Electron Ions  
 339 formula(e) evaluated with 2 results within limits (up to 50 closest results for each mass)  
 Elements Used:  
 C: 0-500 H: 0-1000 O: 0-200 Na: 0-1  
 57  
 20190107\_61 205 (1.657)

1: TOF MS ES+  
 1.22e+005

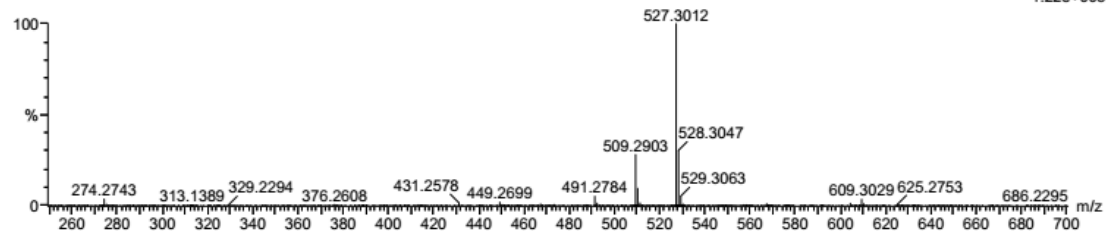

Minimum: -1.5  
 Maximum: 5.0 5.0 50.0

| Mass     | Calc. Mass | mDa  | PPM  | DBE  | i-FIT | Norm  | Conf (%) | Formula       |
|----------|------------|------|------|------|-------|-------|----------|---------------|
| 609.3029 | 609.3040   | -1.1 | -1.8 | 10.5 | 58.5  | 0.018 | 98.25    | C33 H46 O9 Na |
|          | 609.3005   | 2.4  | 3.9  | 22.5 | 62.5  | 4.046 | 1.75     | C42 H41 O4    |

B

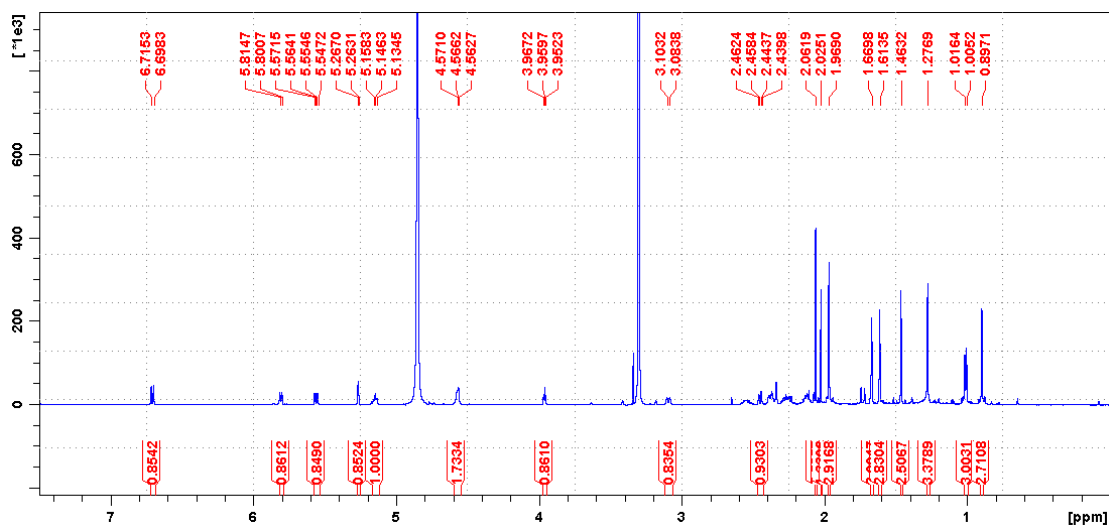

C

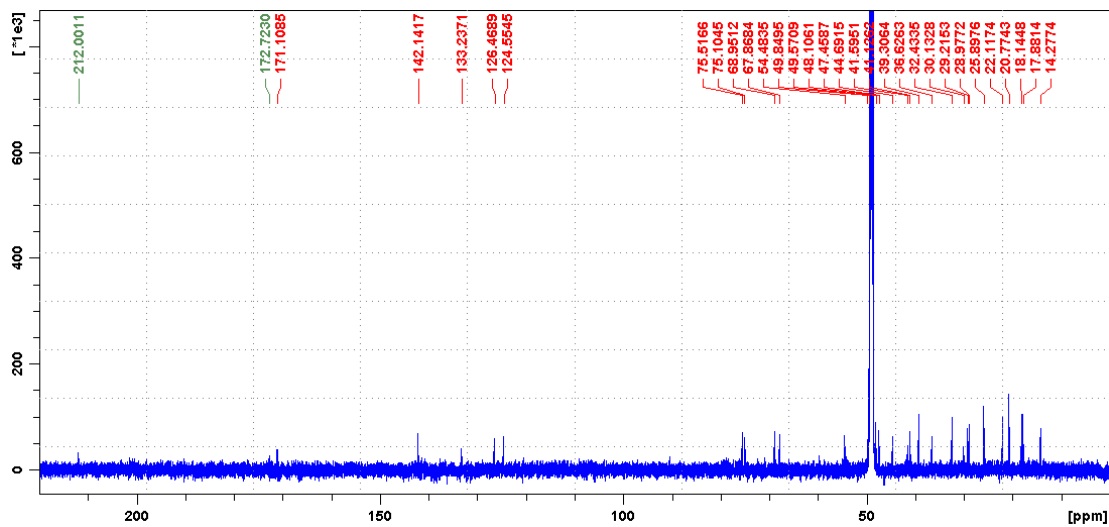

D

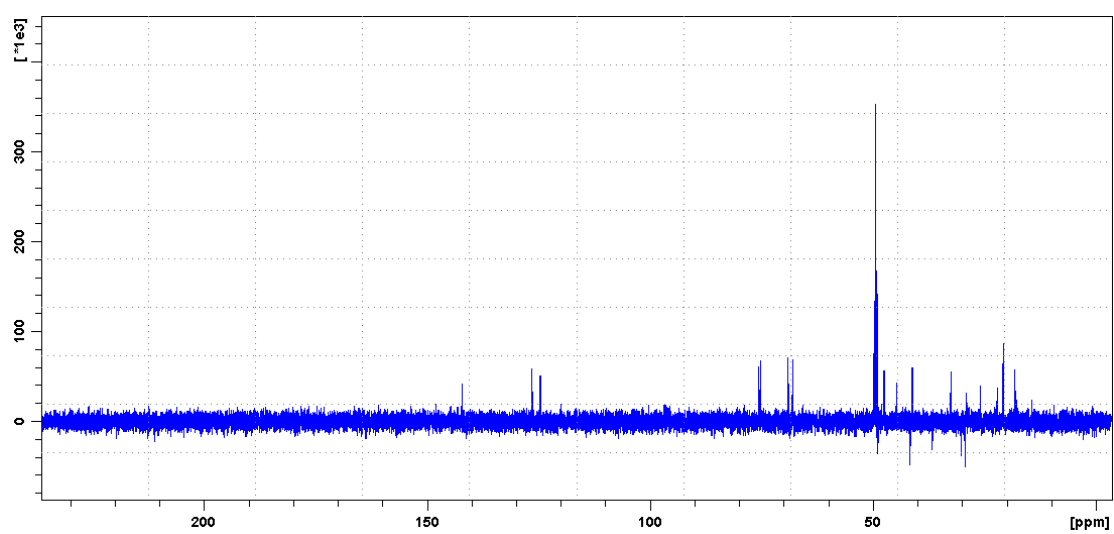

E

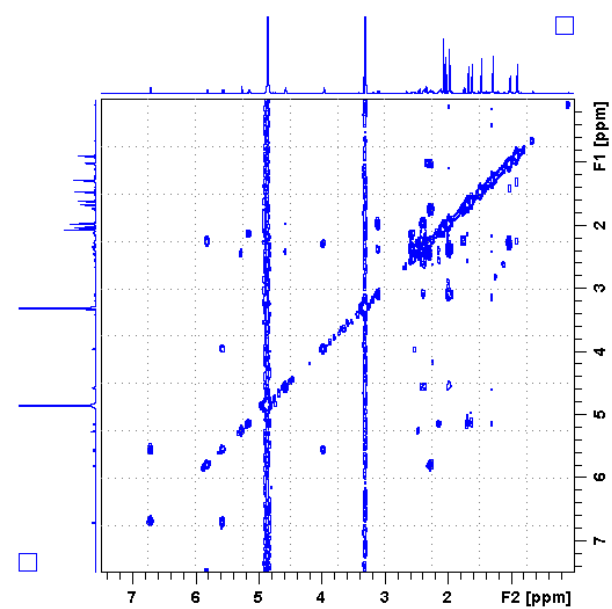

F

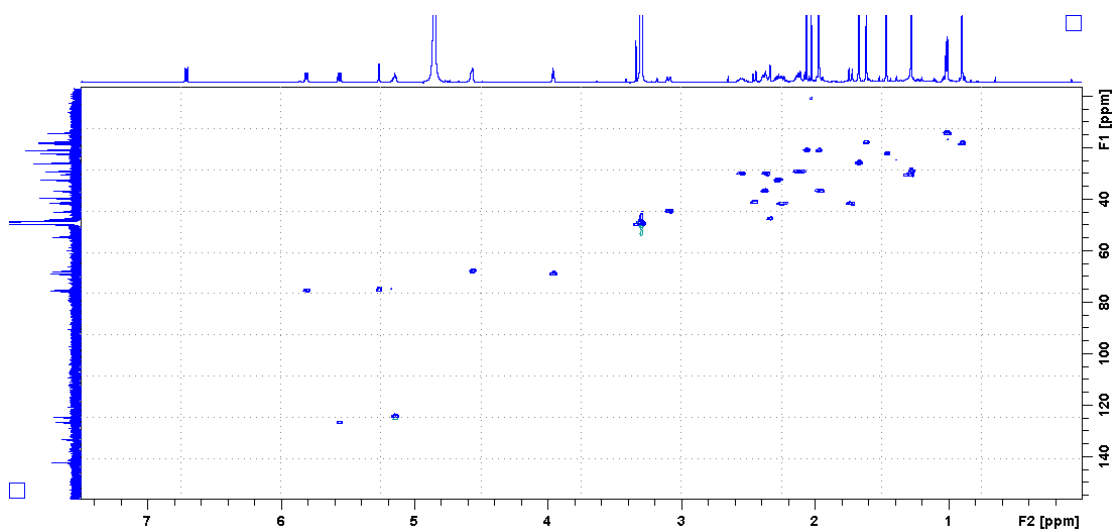

G

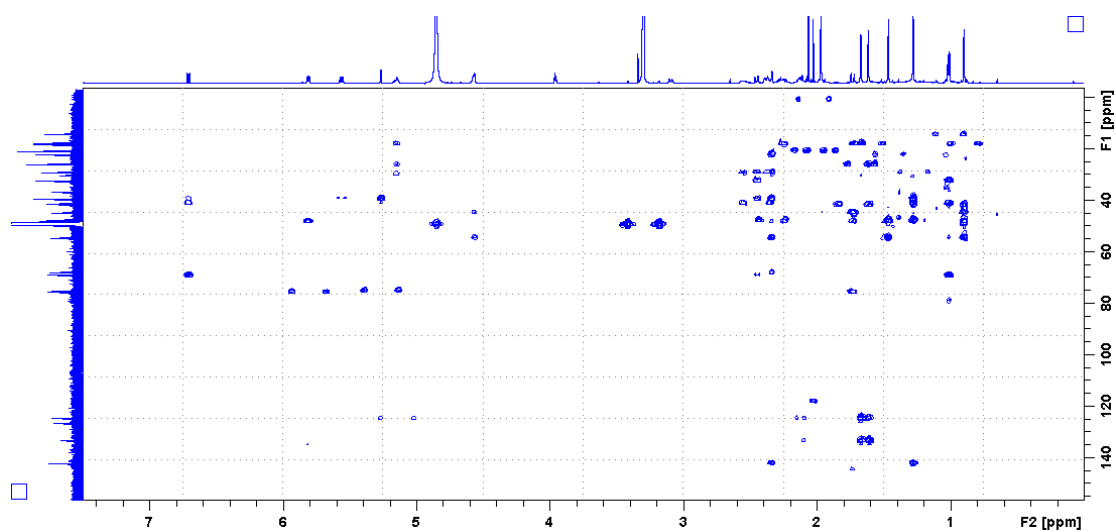

H

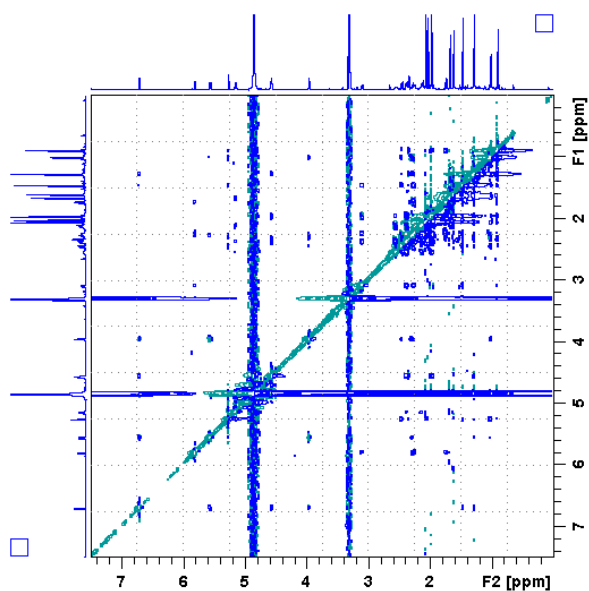

**Figure S60** HRESIMS and NMR spectra of **69**.

(A) HRESIMS spectrum; (B)  $^1\text{H}$  NMR spectrum in  $\text{CD}_3\text{OD}$  at 600 MHz; (C)  $^{13}\text{C}$  NMR spectrum in  $\text{CD}_3\text{OD}$  at 150 MHz; (D) DEPT 135 spectrum in  $\text{CD}_3\text{OD}$  at 150 MHz; (E)  $^1\text{H}$ - $^1\text{H}$  COSY spectrum in  $\text{CD}_3\text{OD}$  at 600 MHz; (F) HSQC spectrum in  $\text{CD}_3\text{OD}$  at 600 MHz; (G) HMBC spectrum in  $\text{CD}_3\text{OD}$  at 600 MHz; (H) ROESY spectrum in  $\text{CD}_3\text{OD}$  at 600 MHz.



A

Monoisotopic Mass, Even Electron Ions  
 256 formula(e) evaluated with 2 results within limits (up to 50 closest results for each mass)  
 Elements Used:  
 C: 0-200 H: 0-1000 O: 0-200 Na: 0-1  
 AFU-20-3  
 2020081731 226 (1.825)

1: TOF MS ES+  
 1.26e+005

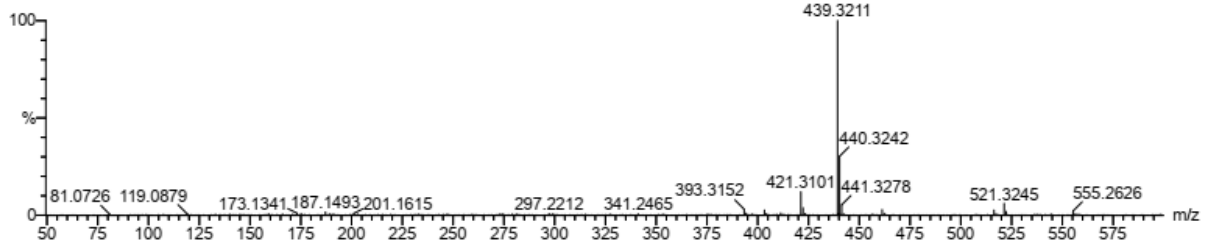

Minimum: -1.5  
 Maximum: 5.0 5.0 50.0

| Mass     | Calc. Mass | mDa  | PPM  | DBE  | i-FIT | Norm  | Conf (%) | Formula       |
|----------|------------|------|------|------|-------|-------|----------|---------------|
| 521.3245 | 521.3243   | 0.2  | 0.4  | 8.5  | 89.0  | 0.075 | 92.82    | C31 H46 O5 Na |
|          | 521.3267   | -2.2 | -4.2 | 11.5 | 91.6  | 2.634 | 7.18     | C33 H45 O5    |

B

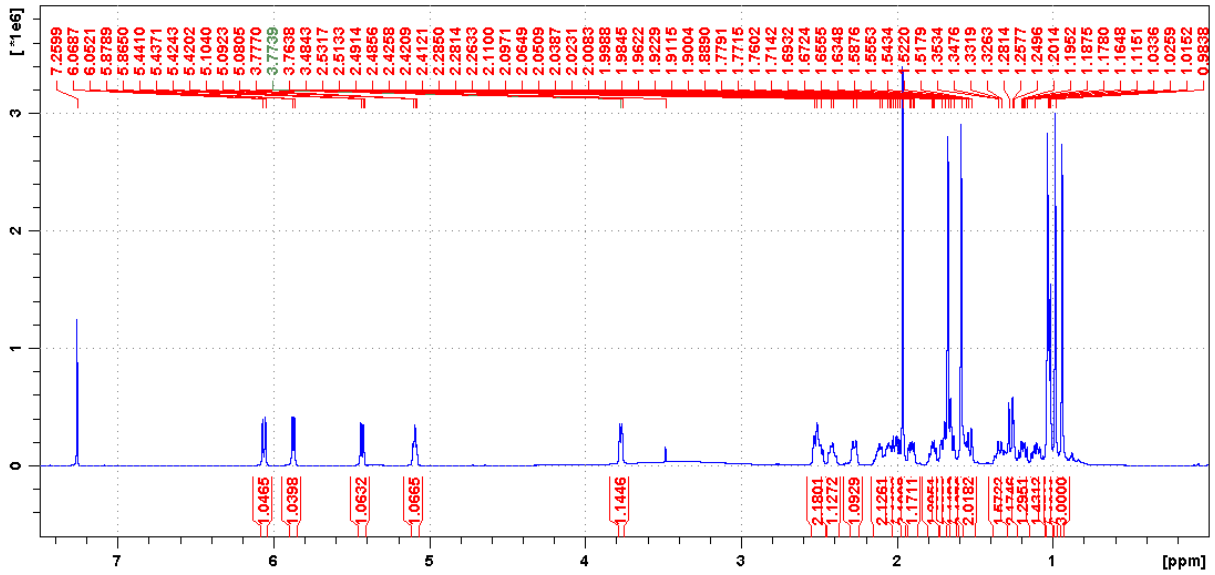

C

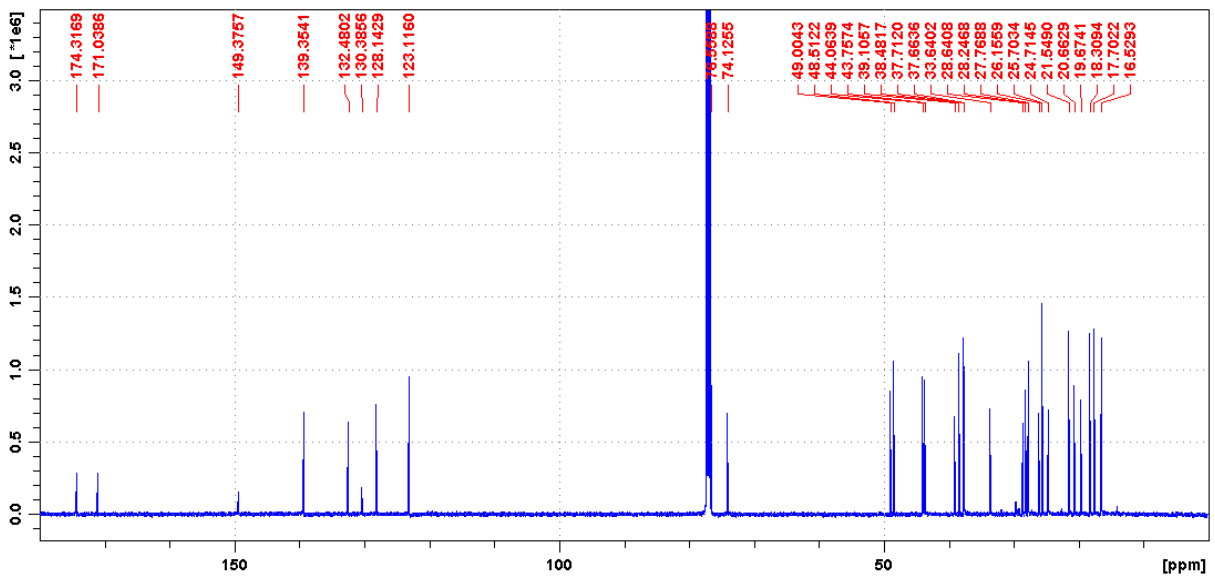

D

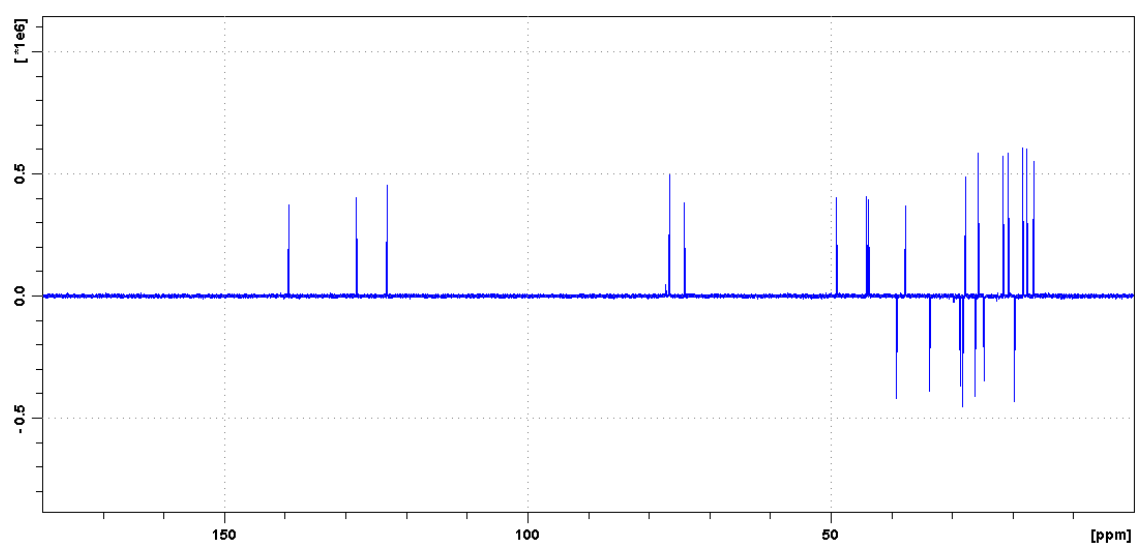

E

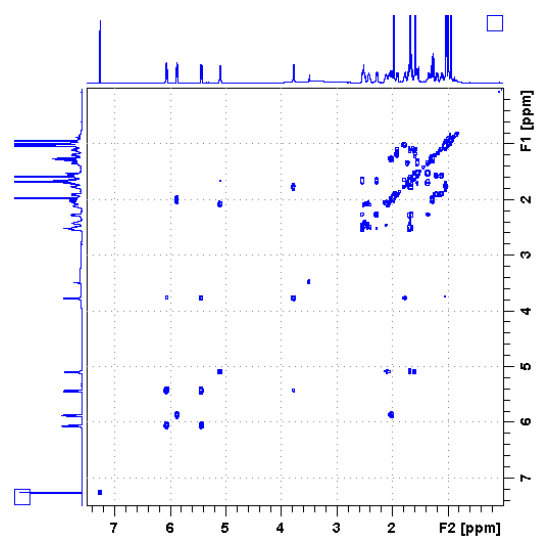

F

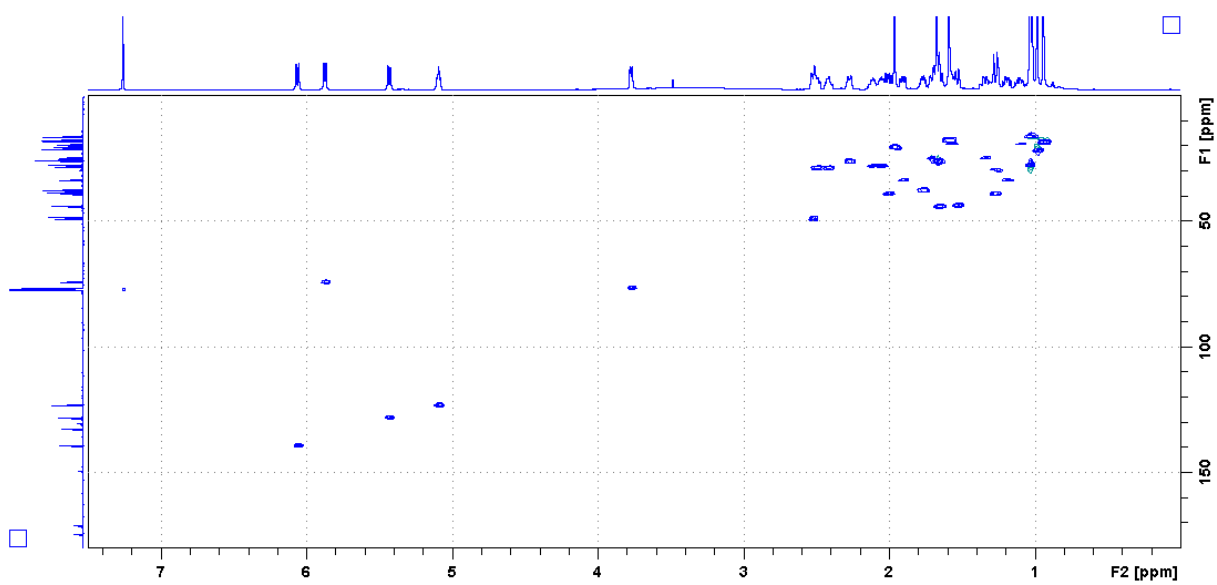

G

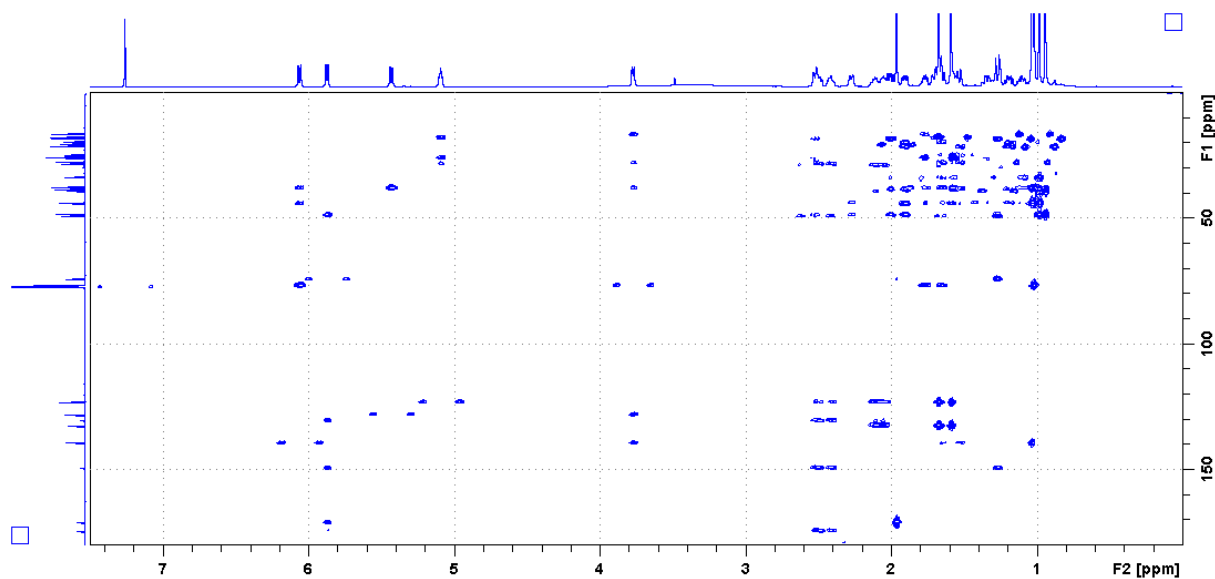

H

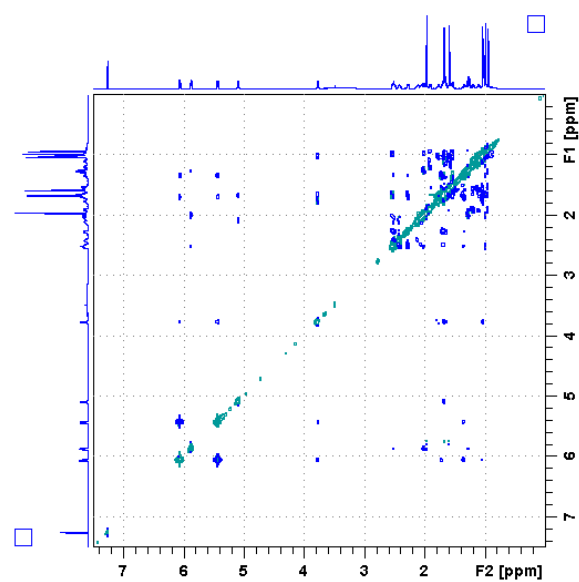

**Figure S61** HRESIMS and NMR spectra of **81**.

(A) HRESIMS spectrum; (B)  $^1\text{H}$  NMR spectrum in  $\text{CDCl}_3$  at 600 MHz; (C)  $^{13}\text{C}$  NMR spectrum in  $\text{CDCl}_3$  at 150 MHz; (D) DEPT 135 spectrum in  $\text{CDCl}_3$  at 150 MHz; (E)  $^1\text{H}$ - $^1\text{H}$  COSY spectrum in  $\text{CDCl}_3$  at 600 MHz; (F) HSQC spectrum in  $\text{CDCl}_3$  at 600 MHz; (G) HMBC spectrum in  $\text{CDCl}_3$  at 600 MHz; (H) ROESY spectrum in  $\text{CDCl}_3$  at 600 MHz.

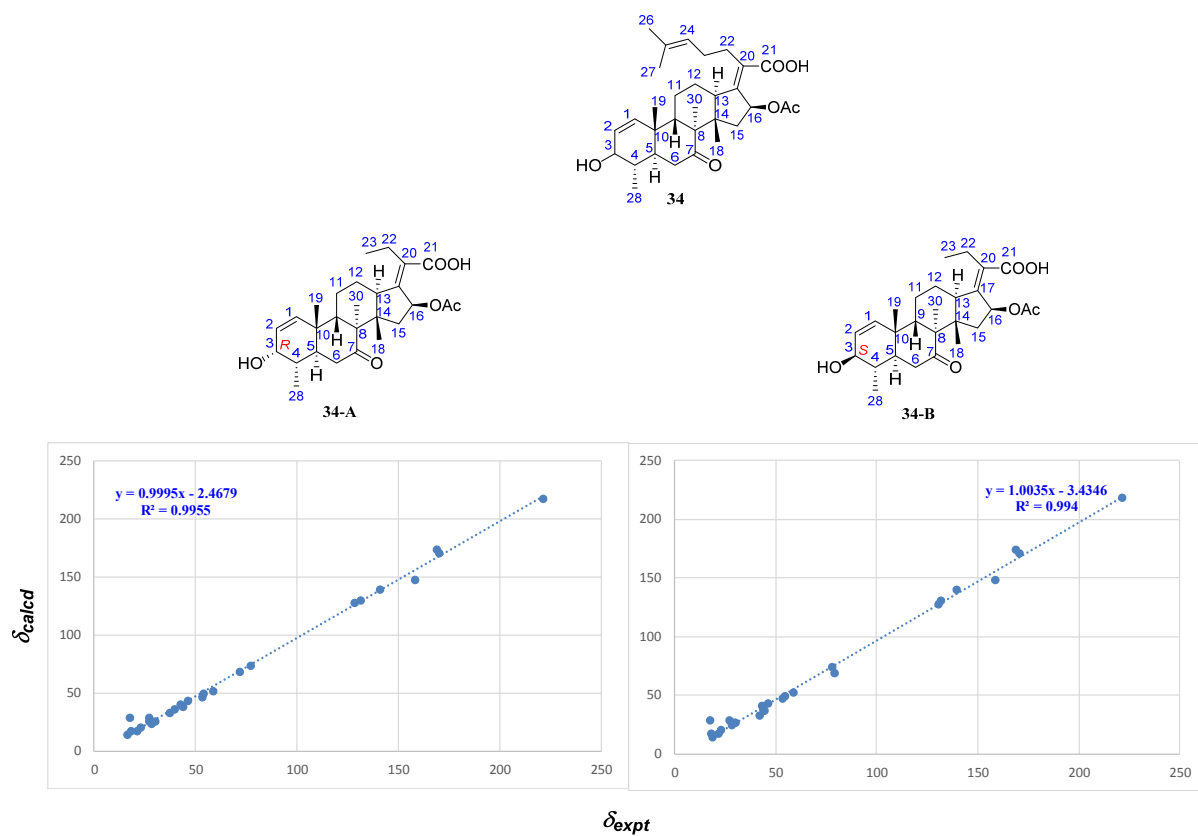

**Figure S62** Linear correlation between calculated  $^{13}\text{C}$  NMR chemical shift values of **34-A/34-B** and experimental values of **34**.

Based on the  $R^2$  values, the relative configuration of **34** is assigned as  $3R^*, 4S^*, 5S^*, 8S^*, S^*, 10S^*, 13R^*, 14S^*, 16S^*$ .

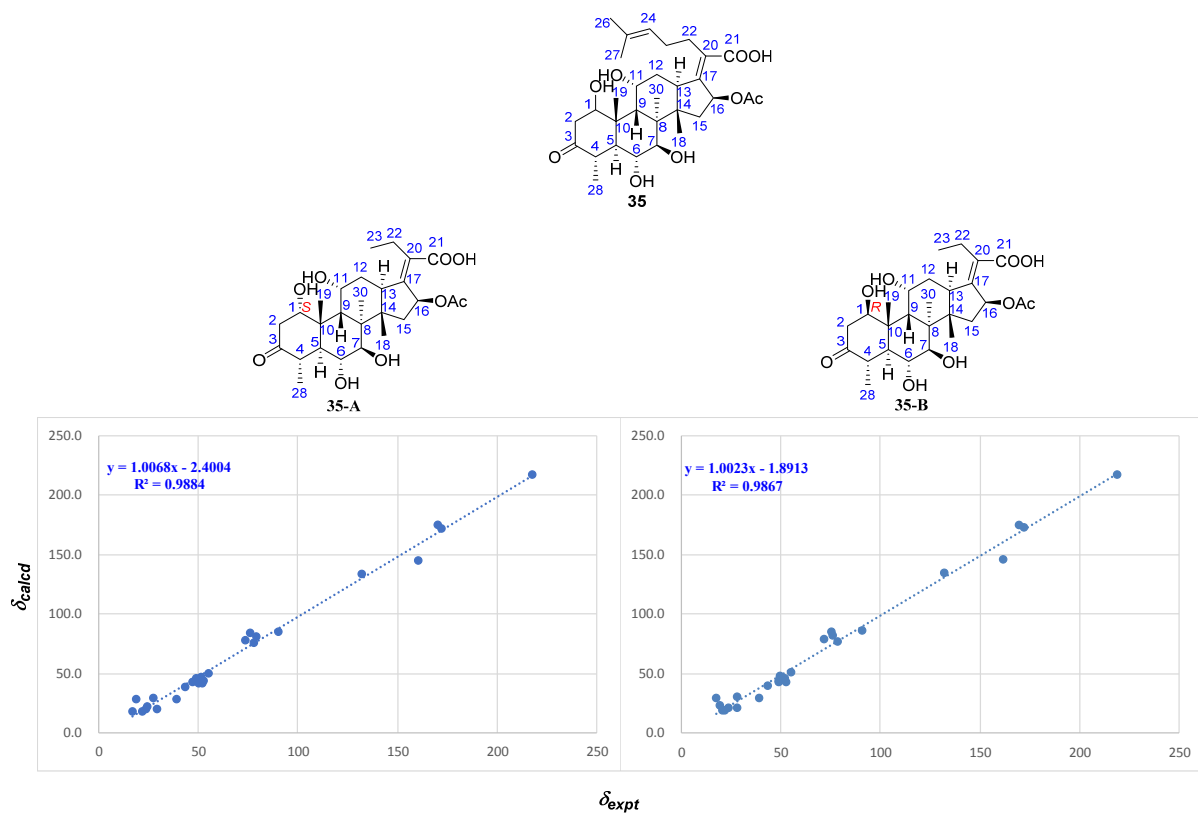

**Figure S63** Linear correlation between calculated  $^{13}\text{C}$  NMR chemical shift values of **35-A/35-B** and experimental values of **35**.

Based on the  $R^2$  values, the relative configuration of **35** is assigned as  $1S^*, 4S^*, 5S^*, 6R^*, 7R^*, 8S^*, 9S^*, 10S^*, 11R^*, 13R^*, 14S^*, 16S^*$ .

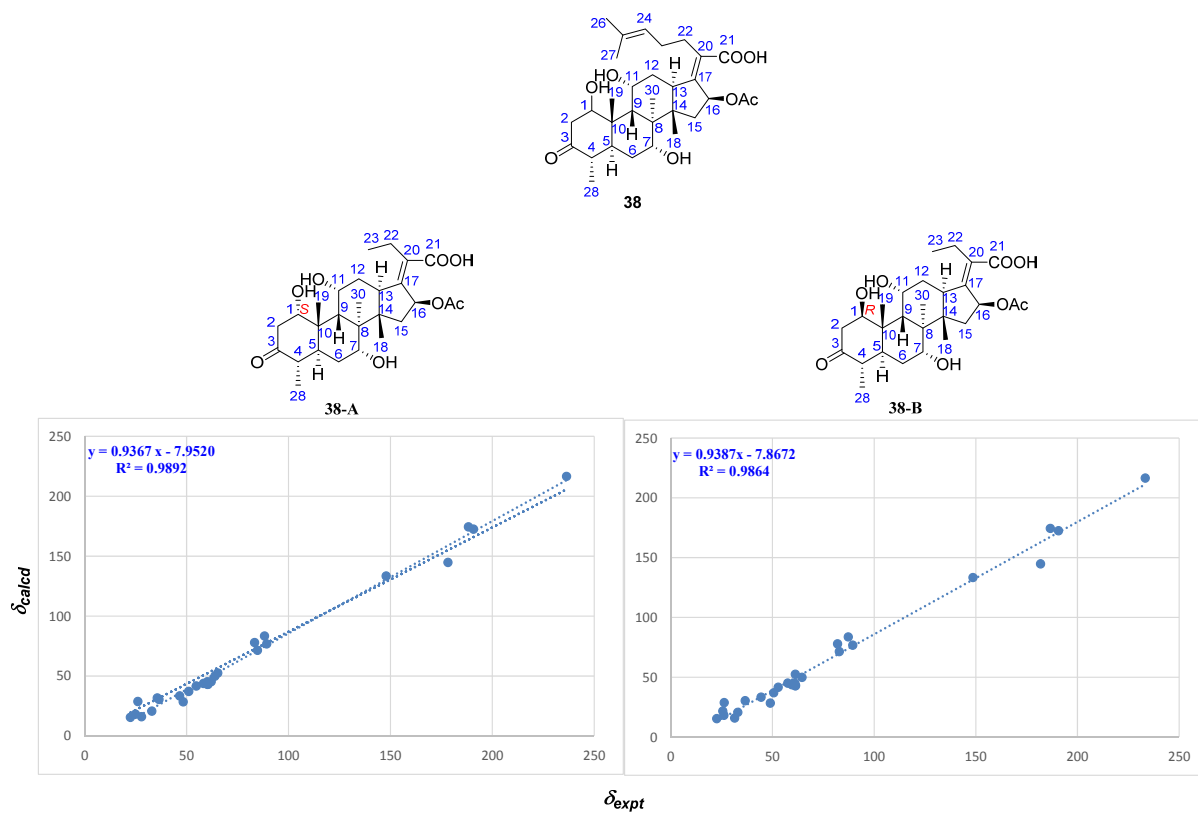

**Figure S64** Linear correlation between calculated  $^{13}\text{C}$  NMR chemical shift values of **38-A/38-B** and experimental values of **38**.

Based on the  $R^2$  values, the relative configuration of **38** is assigned as  $1S^*, 4S^*, 5S^*, 7R^*, 8S^*, 9S^*, 10S^*, 11R^*, 13R^*, 14S^*, 16S^*$ .

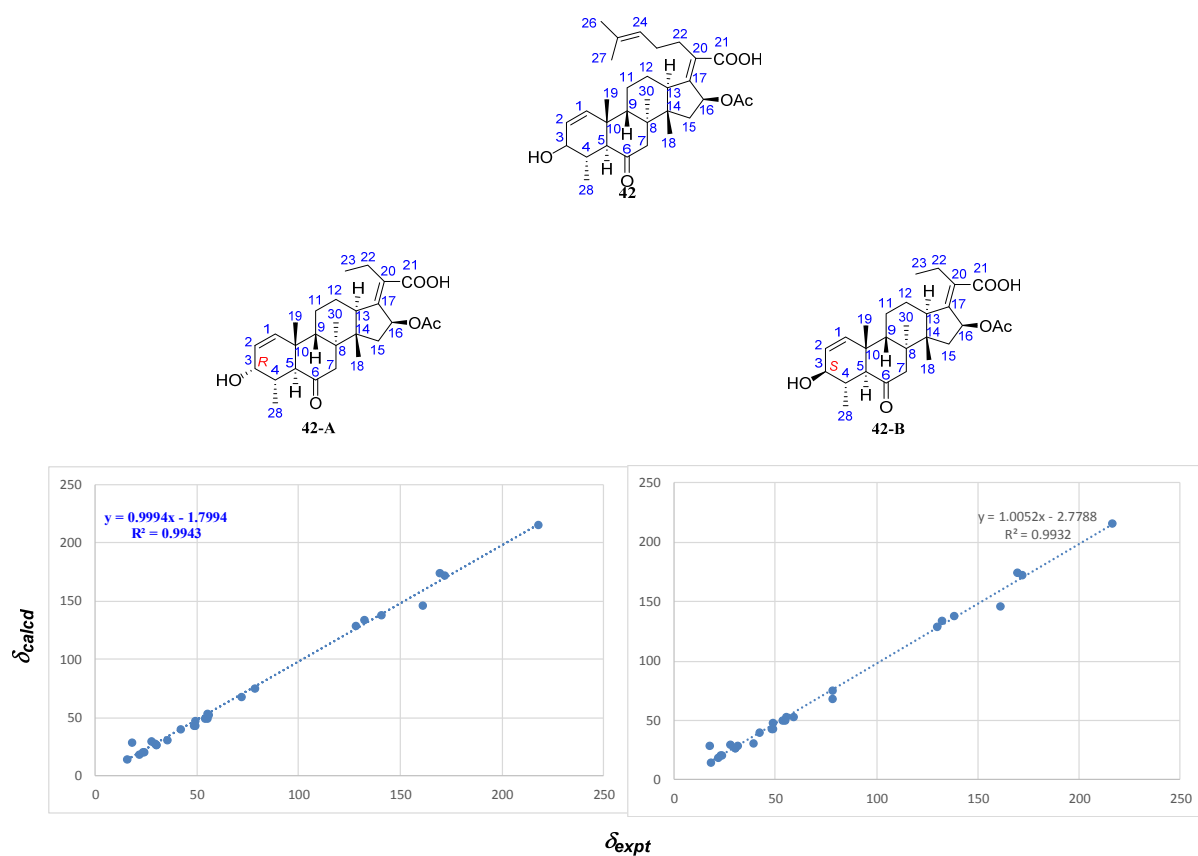

**Figure S65** Linear correlation between calculated  $^{13}\text{C}$  NMR chemical shift values of **42-A/42-B** and experimental values of **42**.

Based on the  $R^2$  values, the relative configuration of **42** is assigned as  $3R^*,4S^*,5S^*,8S^*,9S^*,10R^*,13R^*,14S^*,16S^*$ .

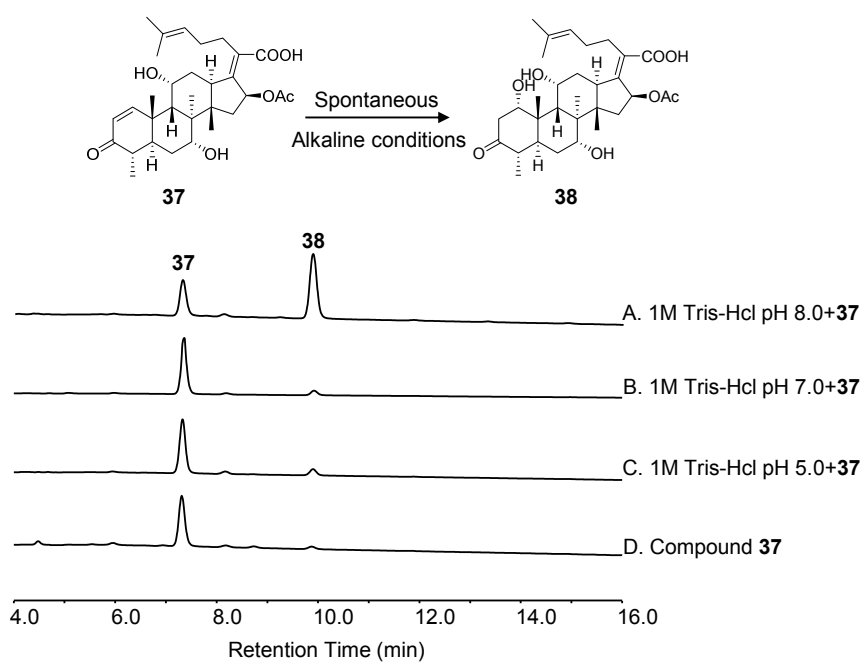

**Figure S66** HPLC analysis for spontaneous 1,4-addition of **37** in Tri-HCl buffer.

(A) **37** incubated in 1 mol/L Tris-HCl buffer (pH 8.0); (B) **37** incubated in 1 mol/L Tris-HCl buffer (pH 7.0); (C) **37** incubated in 1 mol/L Tris-HCl buffer (pH 5.0); (D) Compound **37**.



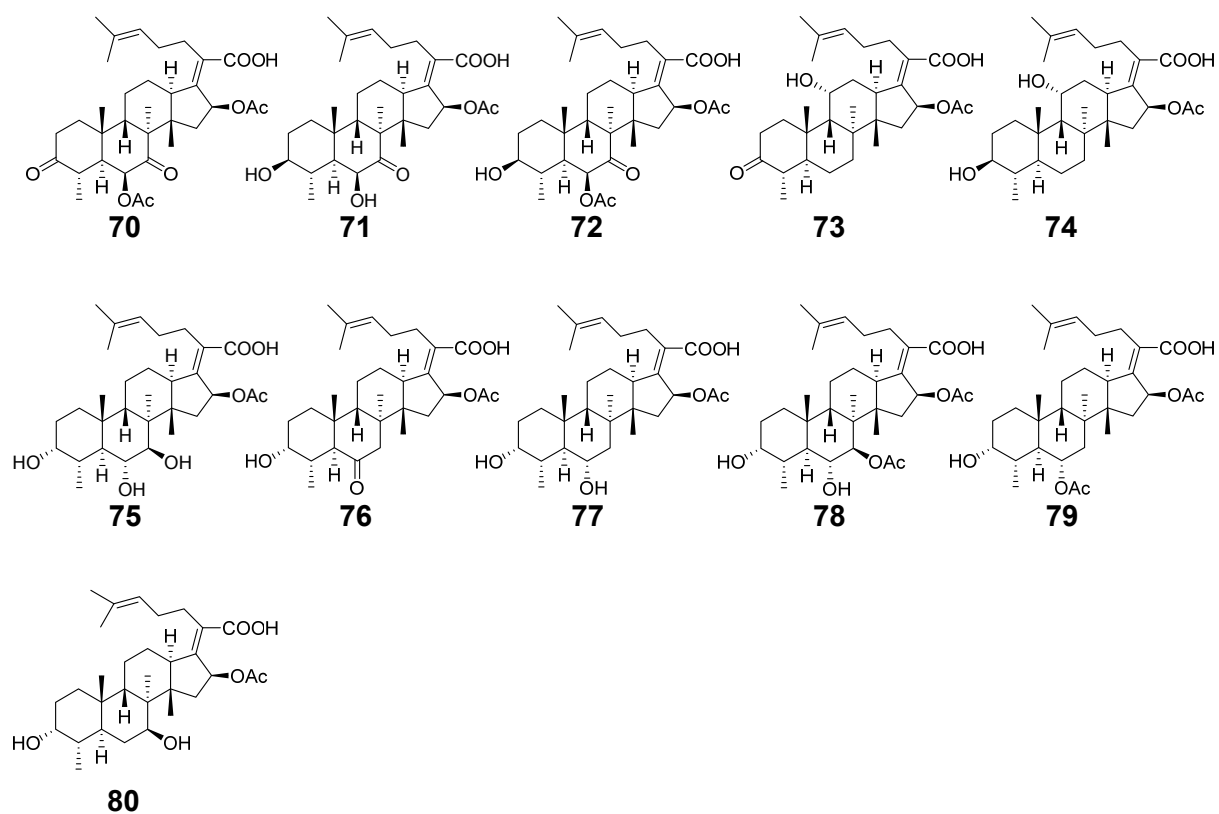

**Figure S67** Previously isolated fusidane-type antibiotics during the biosynthetic study of helvolic acid, fusidic acid and cephalosporin P<sub>1</sub>.

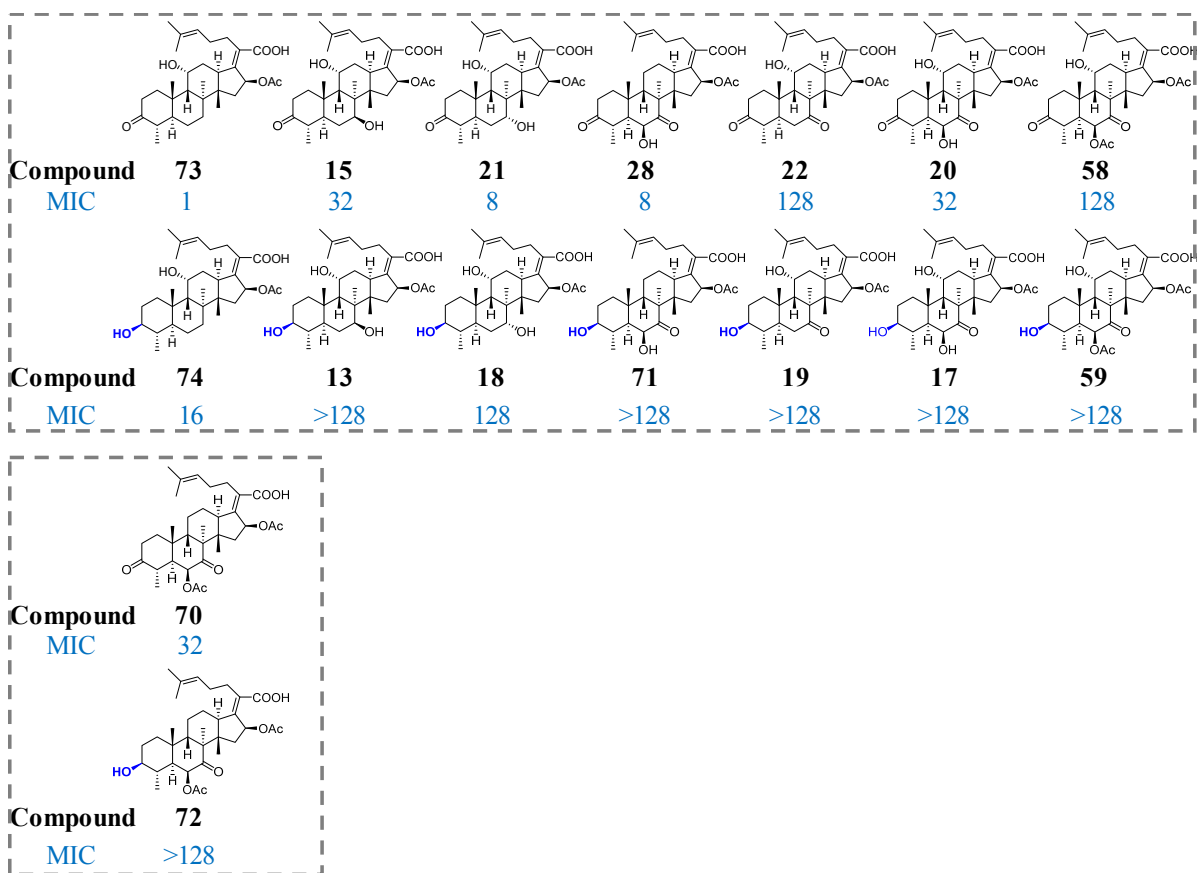

**Figure S68** Comparison of anti-*S. aureus* 209P activity of fusidane-type antibiotics featured with 3-keto and 3 $\beta$ -OH.

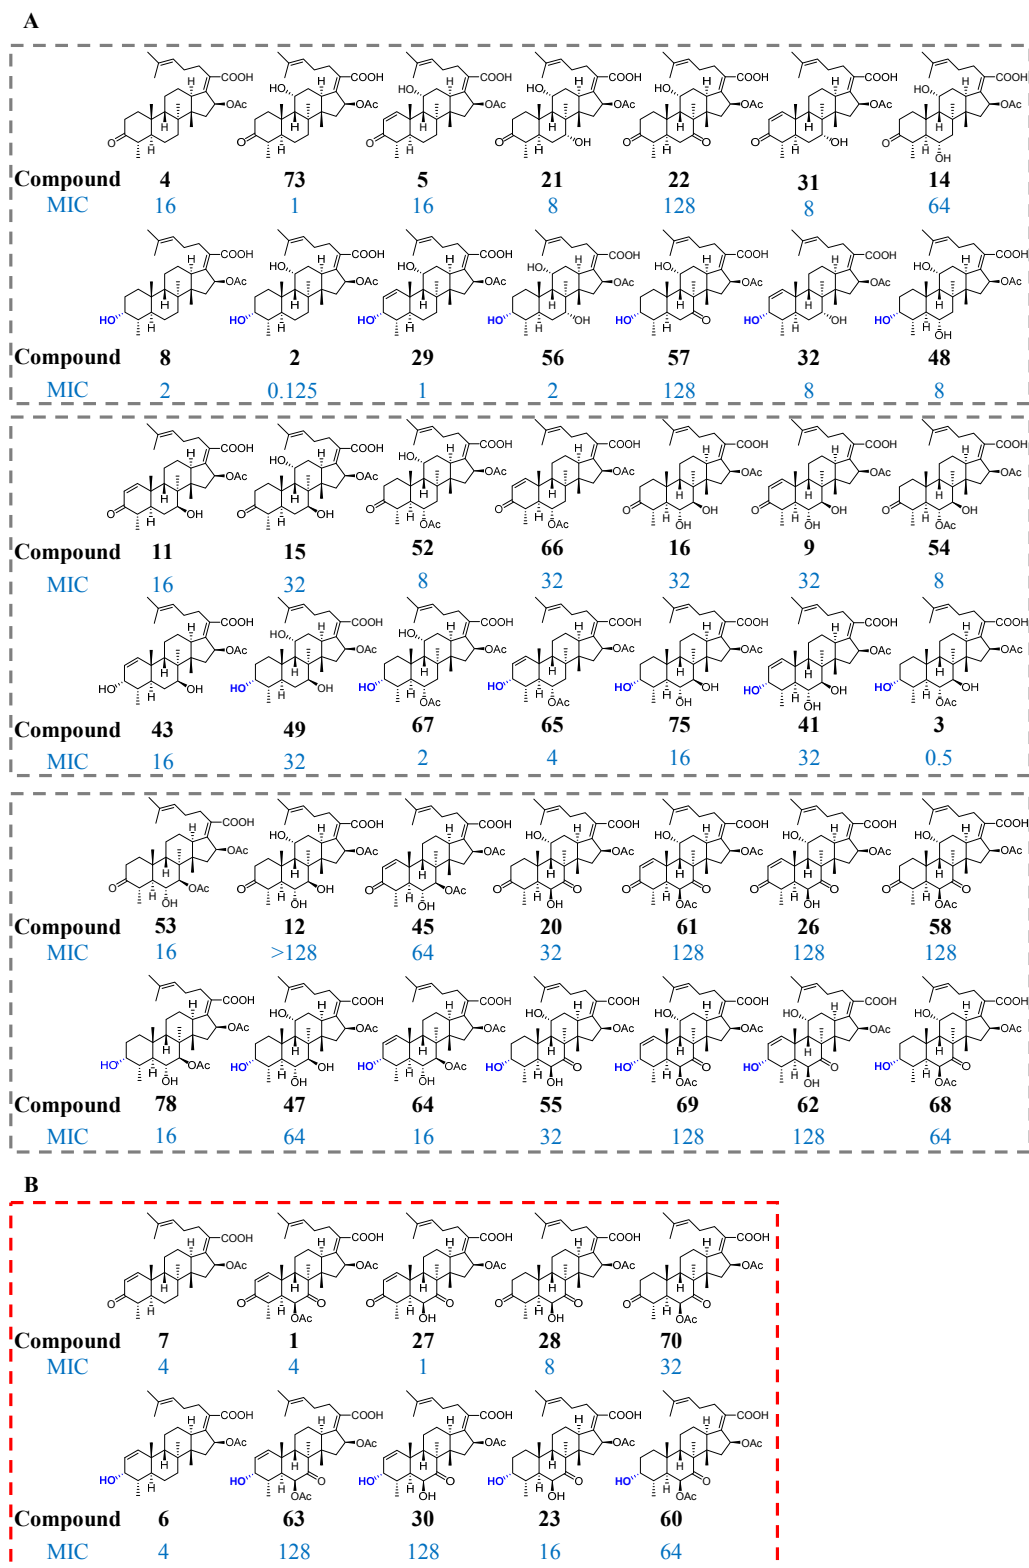

**Figure S69** Comparison of anti-*S. aureus* 209P activity of fusidane-type antibiotics featured with 3-keto and 3 $\alpha$ -OH.

(A) For most fusidane-type antibiotics, 3 $\alpha$ -OH has the positive effect on the activity; (B) For a few fusidane-type antibiotics, 3 $\alpha$ -OH has the negative effect on the activity.

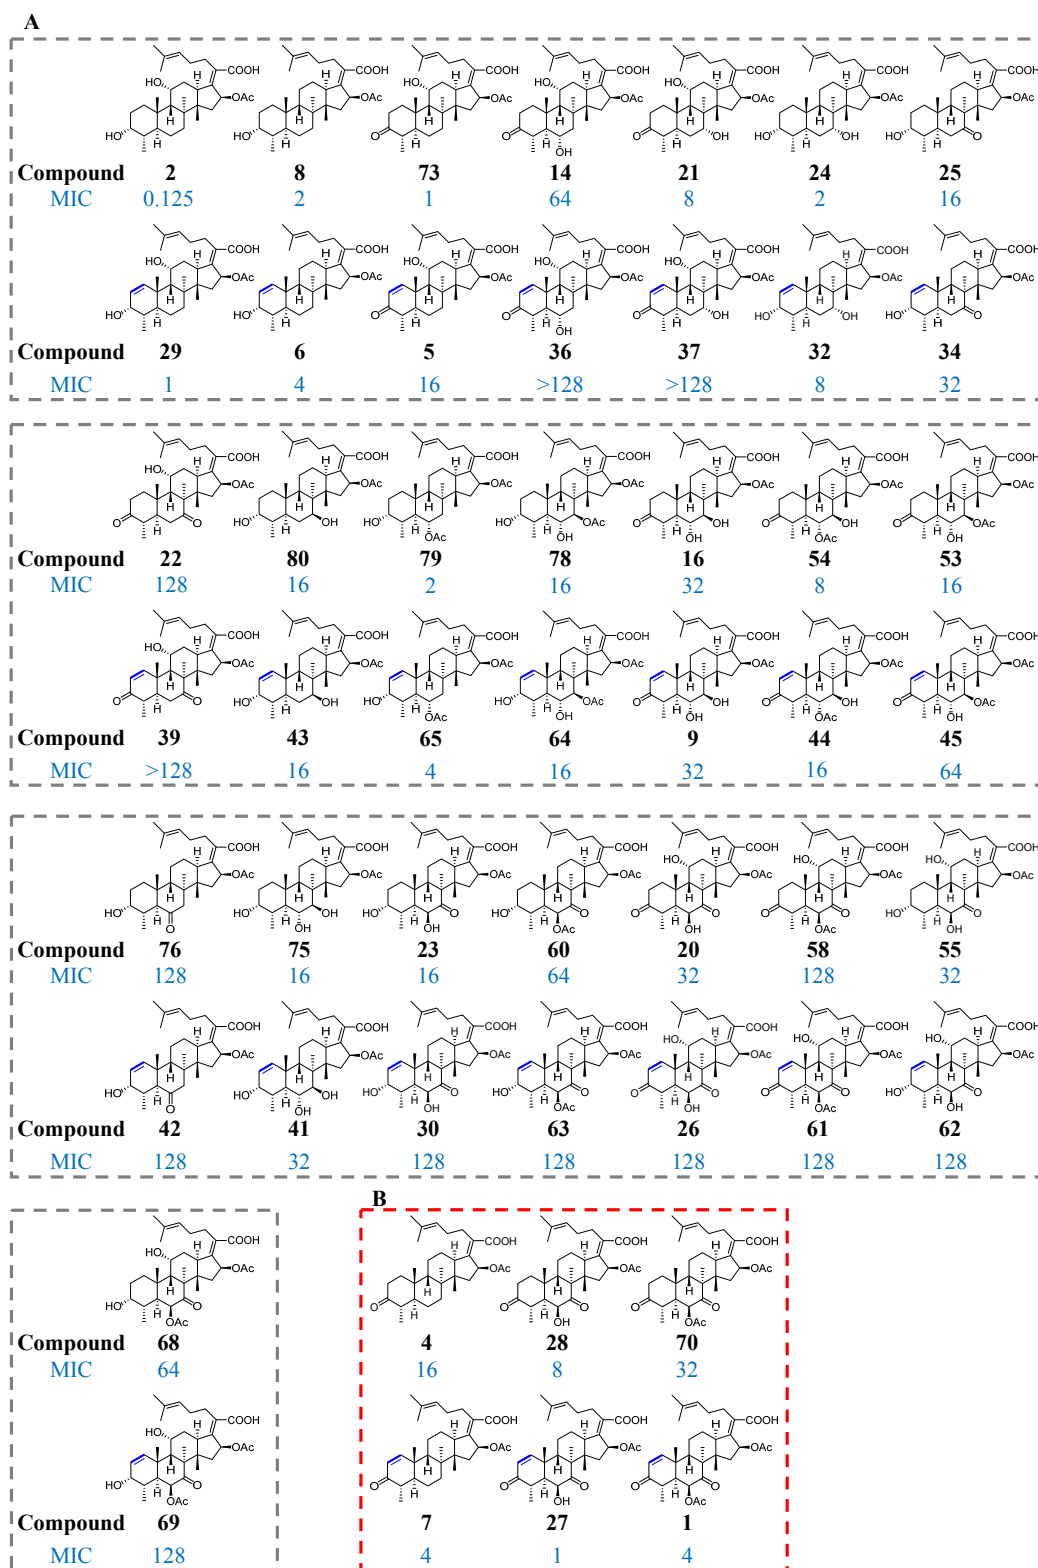

**Figure S70** The effect of the C1/C2 double bond on anti-*S. aureus* 209P activity.

(A) For most fusidane-type antibiotics, the C1/C2 double bond has the negative effect; (B) For a few fusidane-type antibiotics, the C1/C2 double bond has the positive effect.

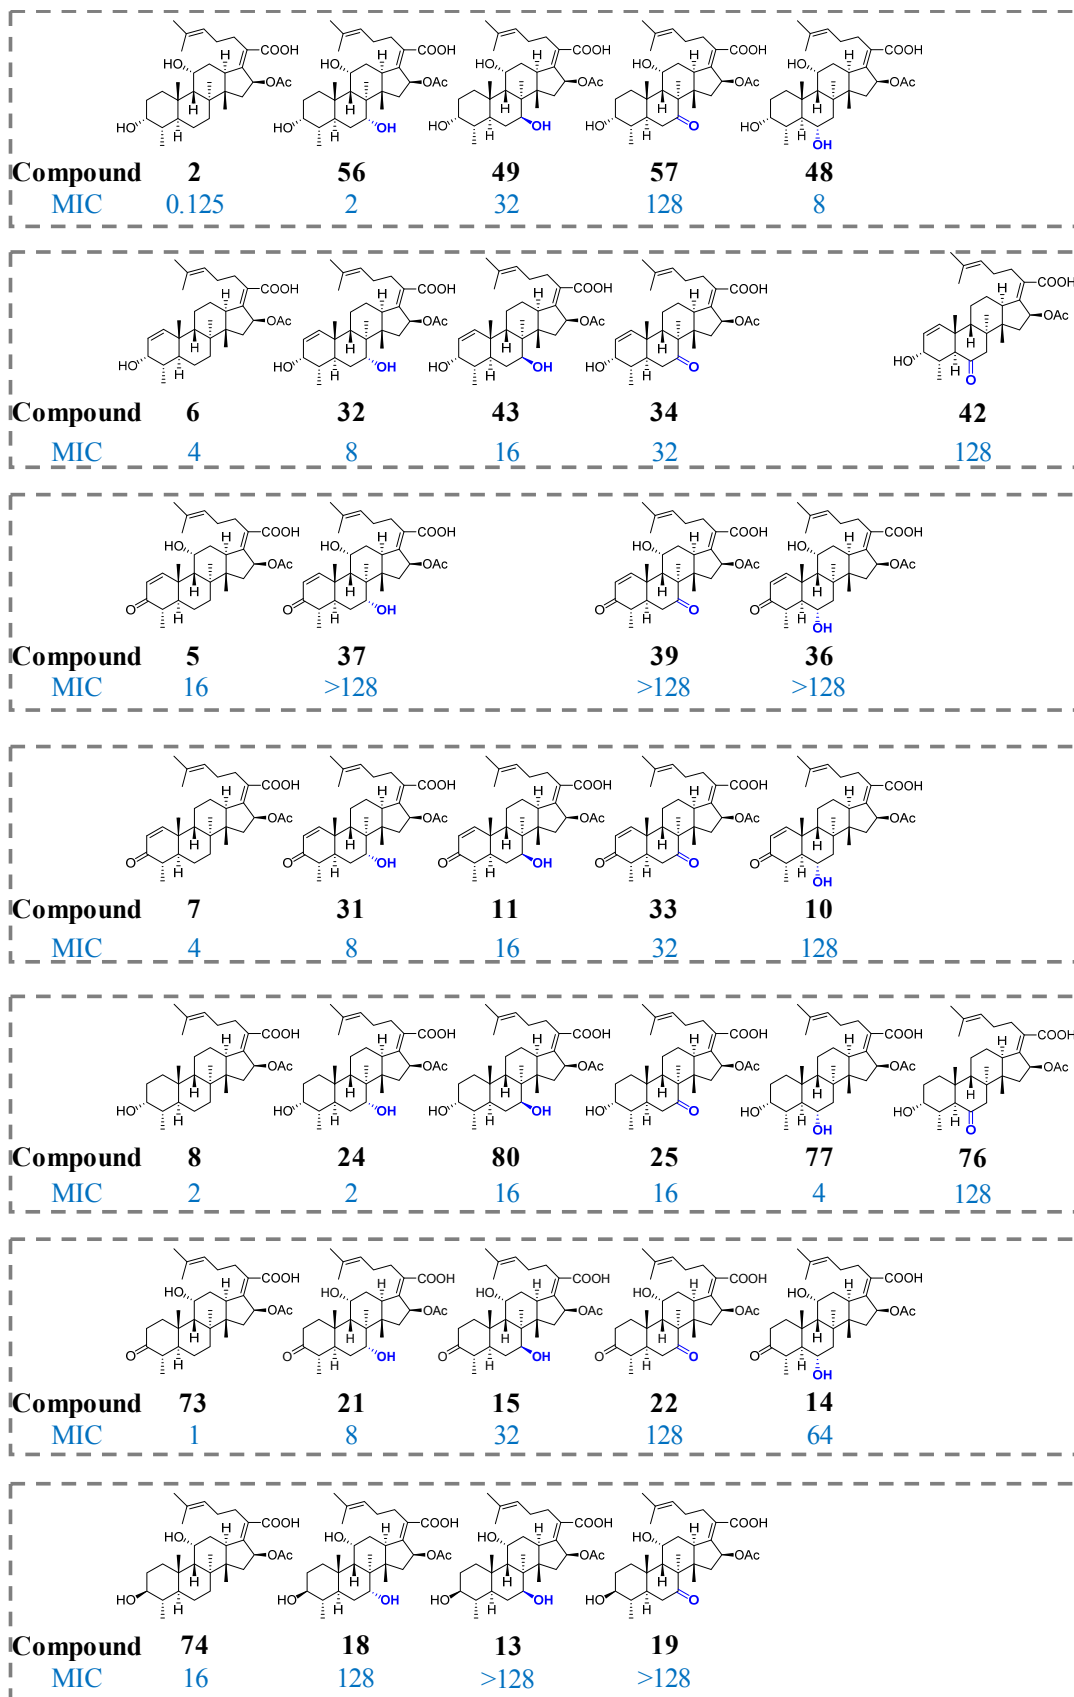

**Figure S71** The detrimental effect of mono-oxidation at C6 or C7 on anti-*S. aureus* 209P activity.

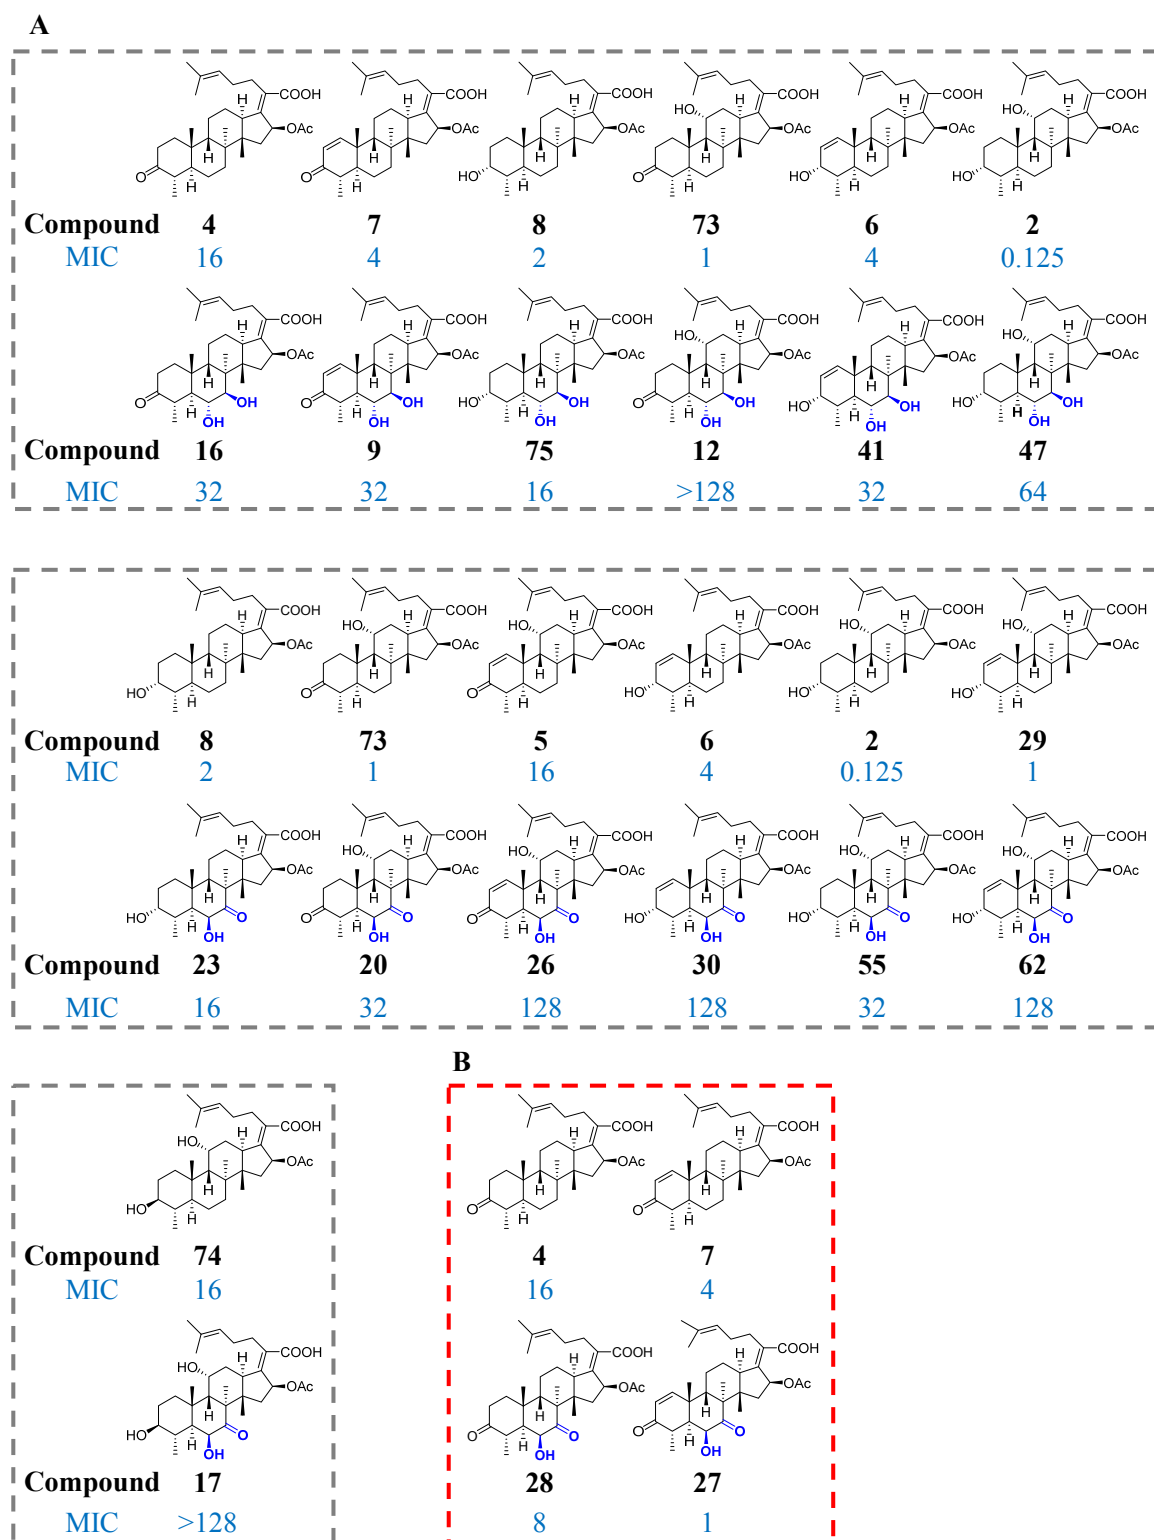

**Figure S72** The effect of dual-oxidation at C6 and C7 on anti-*S. aureus* 209P activity. (A) For most fusidane-type antibiotics, the dual-oxidation at C6 and C7 has the negative effect; (B) For a few fusidane-type antibiotics, the dual-oxidation at C6 and C7 has the positive effect.

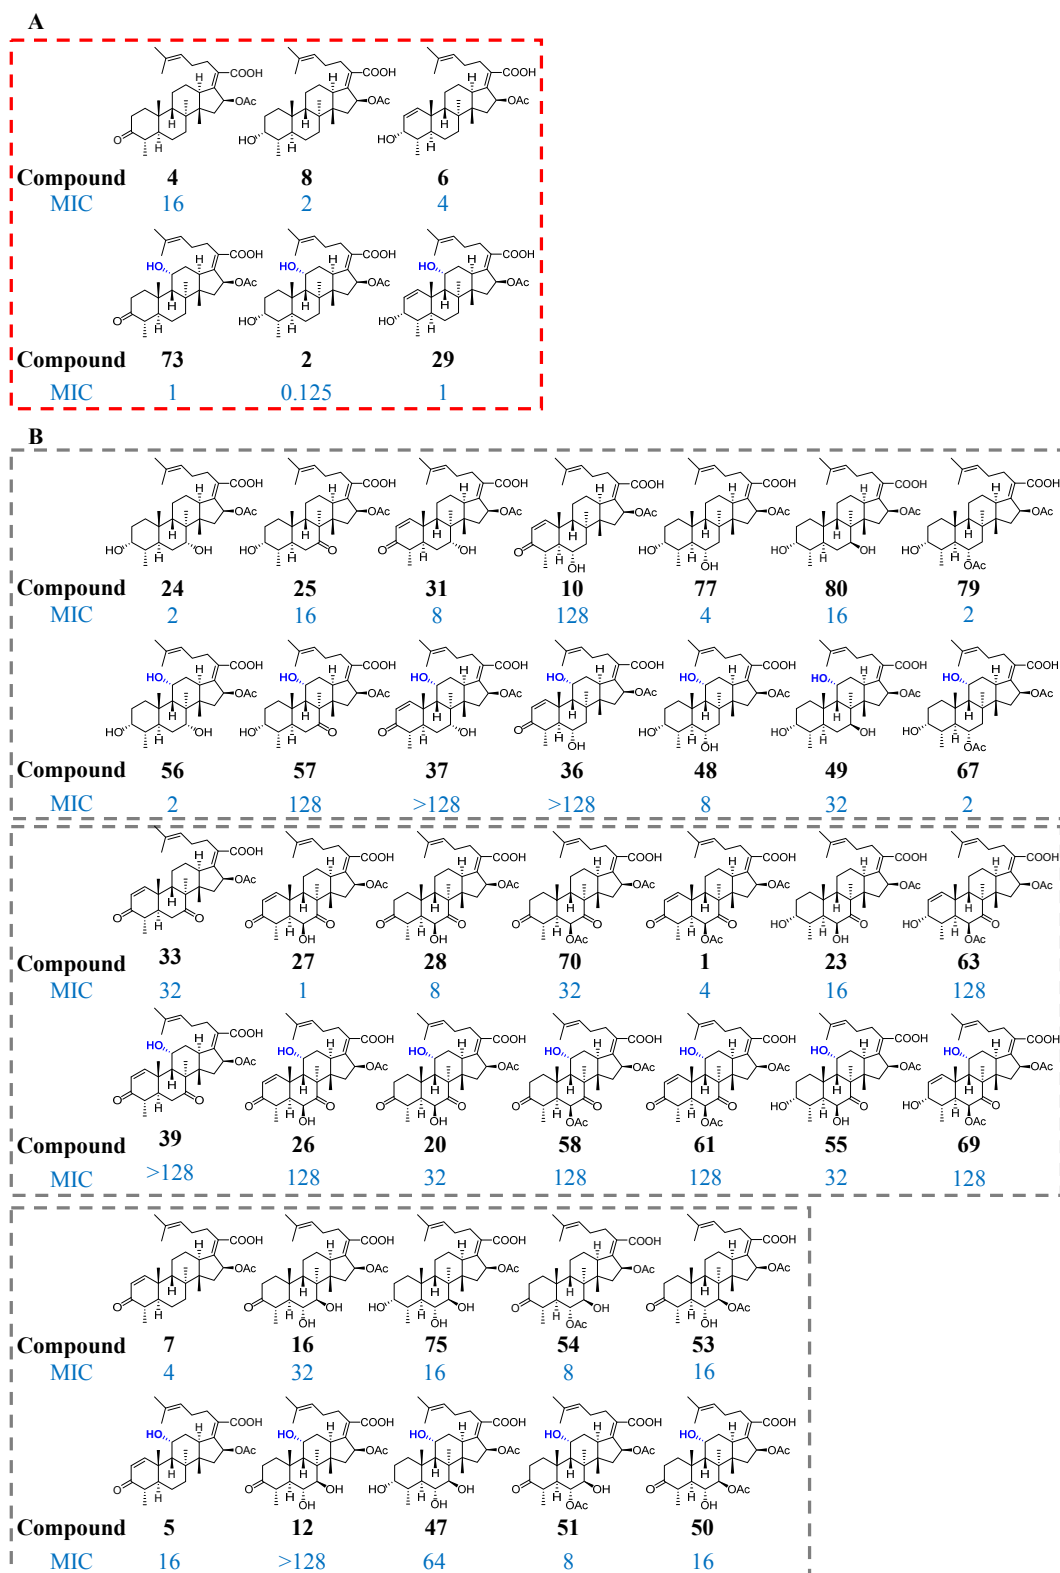

**Figure S73** The effect of C11 $\alpha$ -hydroxylation on anti-*S. aureus* 209P activity.

(A) For a few fusidane-type antibiotics, C11 $\alpha$ -hydroxylation has the positive effect; (B) For most fusidane-type antibiotics, C11 $\alpha$ -hydroxylation has the negative effect.

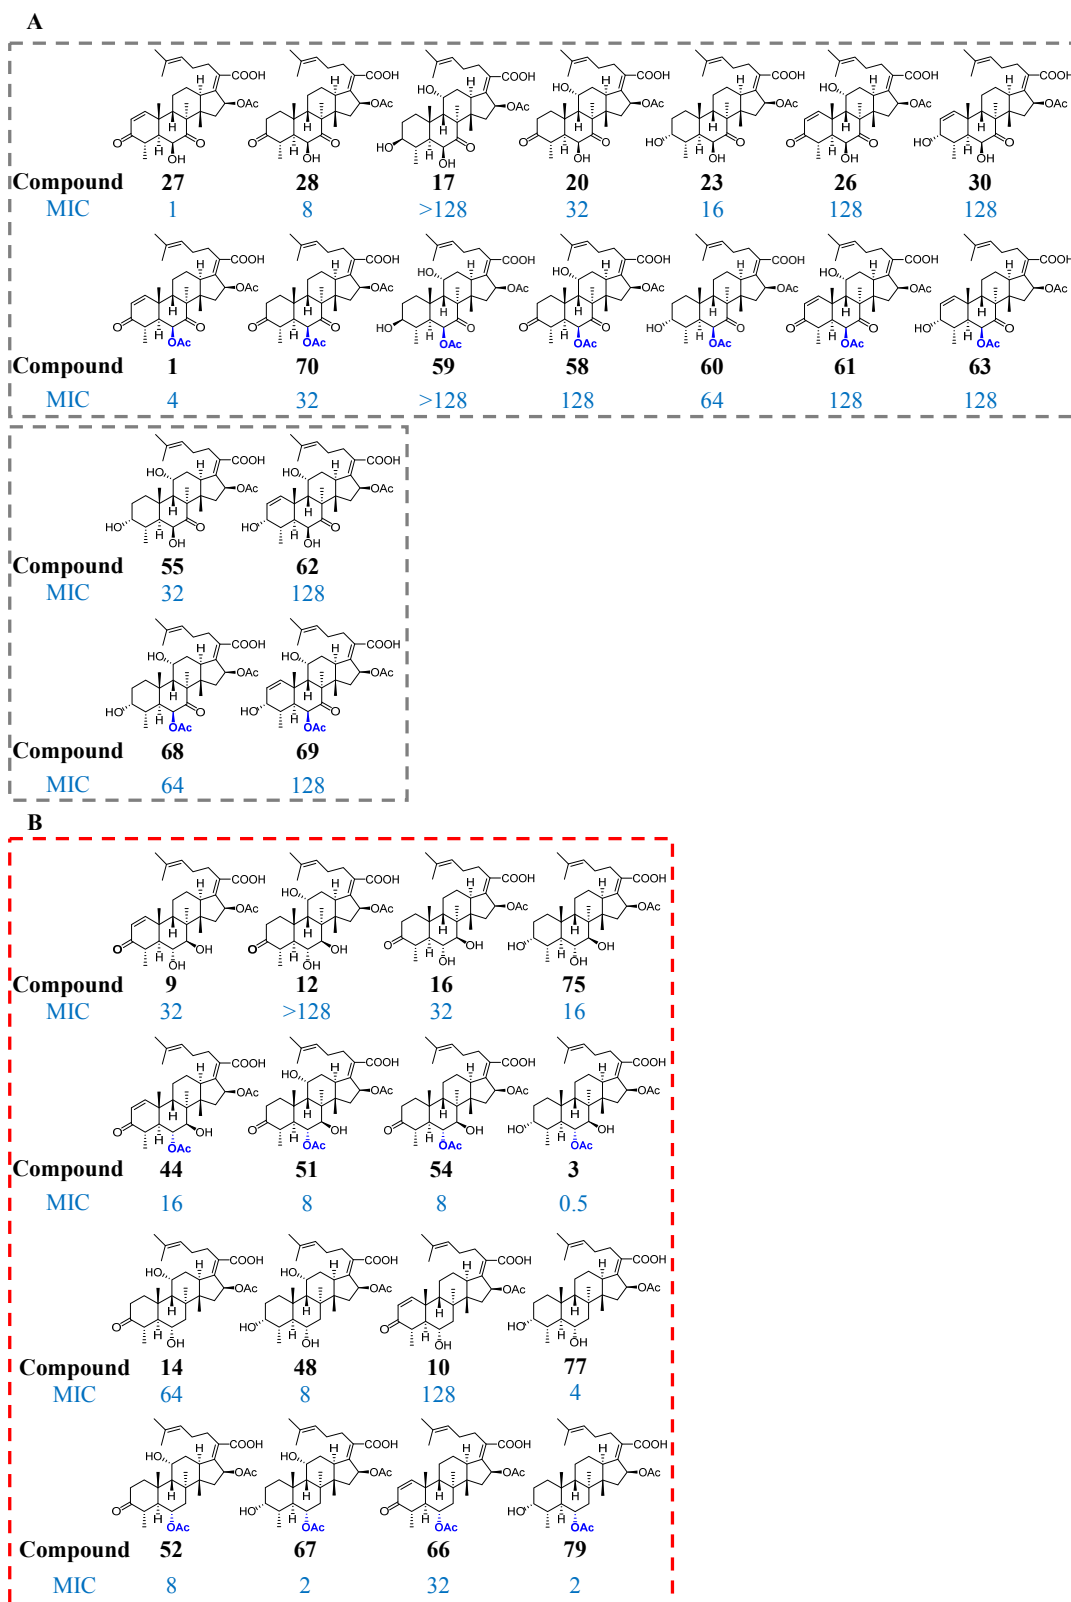

**Figure S74** The effect of acetylation of 6-OH on anti-*S. aureus* 209P activity.

(A) Acetylation of 6 $\beta$ -OH has the negative effect; (B) Acetylation of 6 $\alpha$ -OH has the positive effect.



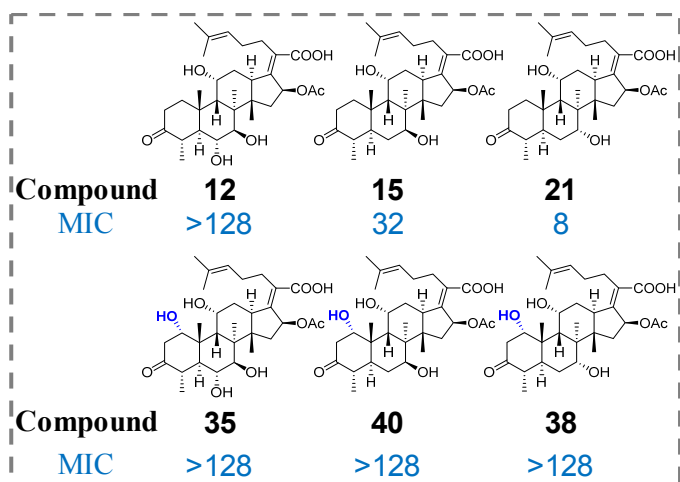

**Figure S75** C1 $\alpha$ -hydroxylation has the negative effect on anti-*S. aureus* 209P activity.

A

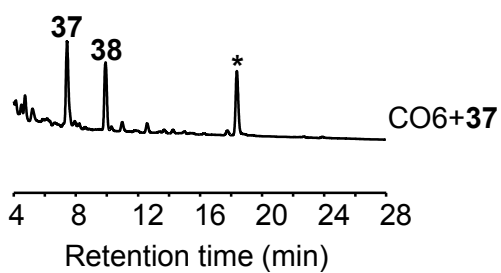

B

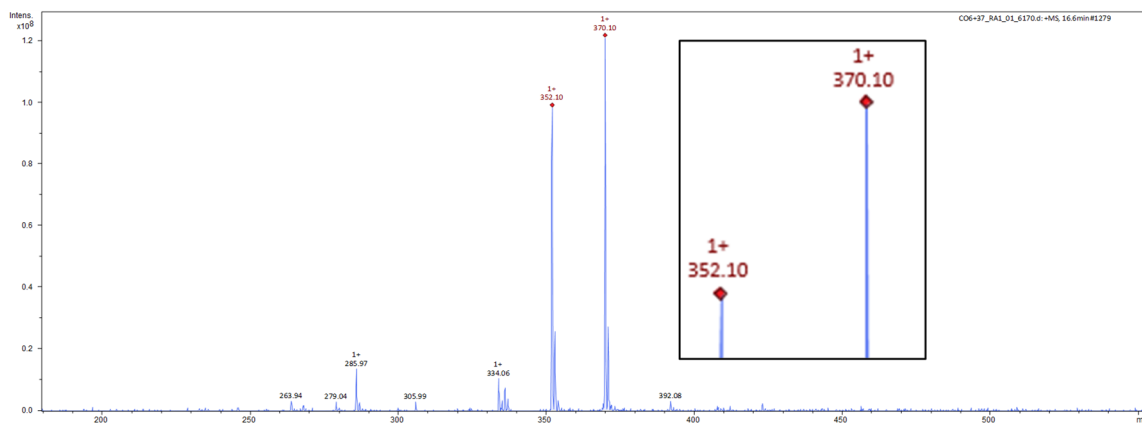

C

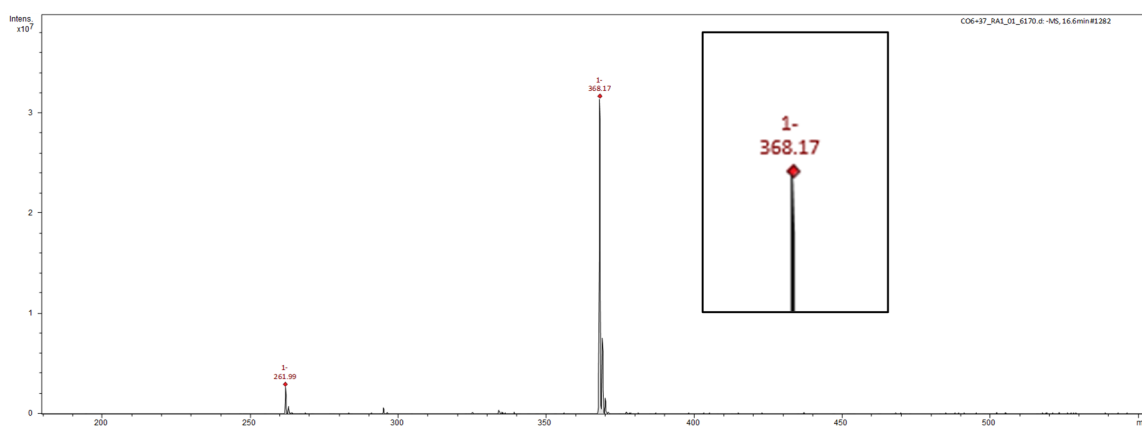

**Figure S76** Analysis of the impurity peak in the feeding experiment using CO6 as the host. (A) The HPLC profile of CO6 incubated with **37**; (B) The positive mass spectrum of the impurity peak labelled with asterisk; (C) The negative mass spectrum of the impurity peak labelled with asterisk.

## Supporting Tables

**Table S1** Eight post-tailoring genes from *hel*, *fus* and *cep* clusters.

| Tailoring gene | Annotated enzyme function                |
|----------------|------------------------------------------|
| <i>helE</i>    | 3-Ketosteroid- $\Delta^1$ -dehydrogenase |
| <i>helB3</i>   | Cytochrome P450 monooxygenase            |
| <i>helD1</i>   | Acetyl transferase                       |
| <i>fusB1</i>   | Cytochrome P450 monooxygenase            |
| <i>fusC1</i>   | Short chain dehydrogenase/reductase      |
| <i>cepB4</i>   | Cytochrome P450 monooxygenase            |
| <i>cepC2</i>   | Short chain dehydrogenase/reductase      |
| <i>cepD2</i>   | Acetyl transferase                       |

**Table S2** All gene combinations and the obtained products.

| Gene combination                                                        | Transformant | Product                               |
|-------------------------------------------------------------------------|--------------|---------------------------------------|
| <b>Two-gene combination</b>                                             |              |                                       |
| <i>helE</i> + <i>fusB1</i>                                              | AOS1         | <b>5</b>                              |
| <i>helE</i> + <i>fusC1</i>                                              | AOS2         | <b>6, 7, 8</b>                        |
| <i>helE</i> + <i>cepB4</i>                                              | AOS3         | <b>7, 9, 10, 11</b>                   |
| <i>fusB1</i> + <i>cepB4</i>                                             | AOS4         | <b>12, 13, 14, 15, 16</b>             |
| <i>fusB1</i> + <i>helB3</i>                                             | AOS5         | <b>17, 18, 19, 20, 21, 22</b>         |
| <i>fusC1</i> + <i>helB3</i>                                             | AOS6         | <b>23, 24, 25</b>                     |
| <b>Three-gene combination</b>                                           |              |                                       |
| <i>helE</i> + <i>fusB1</i> + <i>helB3</i>                               | AOS7         | <b>26, 27, 28</b>                     |
| <i>helE</i> + <i>fusB1</i> + <i>fusC1</i>                               | AOS8         | <b>2, 5, 29</b>                       |
| <i>helE</i> + <i>fusC1</i> + <i>helB3</i>                               | AOS9         | <b>24, 25, 27, 30, 31, 32, 33, 34</b> |
| <i>helE</i> + <i>fusB1</i> + <i>cepB4</i>                               | AOS10        | <b>9, 11, 35, 36, 37, 38, 39, 40</b>  |
| <i>helE</i> + <i>fusC1</i> + <i>cepB4</i>                               | AOS11        | <b>9, 11, 41, 42, 43</b>              |
| <i>helE</i> + <i>cepB4</i> + <i>cepD2</i>                               | AOS12        | <b>7, 11, 44, 45, 46</b>              |
| <i>fusB1</i> + <i>cepB4</i> + <i>fusC1</i>                              | AOS13        | <b>15, 47, 48, 49</b>                 |
| <i>fusB1</i> + <i>cepB4</i> + <i>cepD2</i>                              | AOS14        | <b>50, 51, 52, 53, 54</b>             |
| <i>fusB1</i> + <i>helB3</i> + <i>fusC1</i>                              | AOS15        | <b>17, 23, 55, 56, 57</b>             |
| <i>fusB1</i> + <i>helB3</i> + <i>helD1</i>                              | AOS16        | <b>18, 19, 21, 58, 59</b>             |
| <i>fusC1</i> + <i>helB3</i> + <i>helD1</i>                              | AOS17        | <b>23, 25, 60</b>                     |
| <b>Four-gene combination</b>                                            |              |                                       |
| <i>helE</i> + <i>fusB1</i> + <i>helB3</i> + <i>helD1</i>                | AOS18        | <b>1, 26, 27, 61</b>                  |
| <i>helE</i> + <i>fusB1</i> + <i>helB3</i> + <i>fusC1</i>                | AOS19        | <b>5, 26, 27, 37, 38, 62</b>          |
| <i>helE</i> + <i>fusC1</i> + <i>helB3</i> + <i>helD1</i>                | AOS20        | <b>24, 25, 27, 30, 31, 33, 63</b>     |
| <i>helE</i> + <i>cepC1</i> + <i>fusB1</i> + <i>cepB4</i>                | AOS21        | <b>16, 75</b>                         |
| <i>helE</i> + <i>fusB1</i> + <i>cepB4</i> + <i>cepD2</i>                | AOS22        | <b>5, 44, 53</b>                      |
| <i>helE</i> + <i>fusC1</i> + <i>cepB4</i> + <i>cepD2</i>                | AOS23        | <b>64, 65, 66</b>                     |
| <i>fusB1</i> + <i>fusC1</i> + <i>cepB4</i> + <i>cepD2</i>               | AOS24        | <b>3, 15, 46, 67</b>                  |
| <i>fusB1</i> + <i>fusC1</i> + <i>helB3</i> + <i>helD1</i>               | AOS25        | <b>56, 68</b>                         |
| <b>Five-gene combination</b>                                            |              |                                       |
| <i>helE</i> + <i>fusB1</i> + <i>fusC1</i> + <i>helB3</i> + <i>helD1</i> | AOS26        | <b>23, 60, 68, 69</b>                 |
| <i>helE</i> + <i>fusB1</i> + <i>fusC1</i> + <i>cepB4</i> + <i>cepD2</i> | AOS27        | <b>5, 9, 29</b>                       |

**Table S3** NMR data for **5** ( $^1\text{H}$  for 400 MHz and  $^{13}\text{C}$  for 100 MHz in  $\text{CDCl}_3$ ).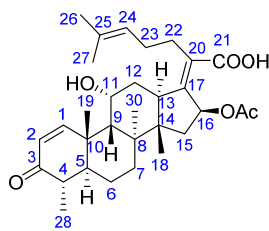**5**

| Position                     | $\delta_{\text{C}}$ , type | $\delta_{\text{H}}$ ( $J$ in Hz) <sup>a</sup> | $^1\text{H}$ – $^1\text{H}$ COSY | HMBC                                     | ROESY       |
|------------------------------|----------------------------|-----------------------------------------------|----------------------------------|------------------------------------------|-------------|
| 1                            | 160.4, CH                  | 7.66, d (10.3)                                | 2                                | 3, 5, 9, 10                              | 11          |
| 2                            | 126.6, CH                  | 5.85, d (10.3)                                | 1                                | 4, 10                                    |             |
| 3                            | 202.2, C                   |                                               |                                  |                                          |             |
| 4                            | 43.4, CH                   | 2.35                                          | 5, 28                            |                                          | 19          |
| 5                            | 42.8, CH                   | 2.41                                          | 4, 6a, 6b                        | 4                                        | 28, 30      |
| 6                            | 21.0, CH <sub>2</sub>      | a: 1.76<br>b: 1.33                            | 5, 6b, 7a, 7b<br>5, 6a, 7a, 7b   |                                          |             |
| 7                            | 31.8, CH <sub>2</sub>      | a: 1.77<br>b: 1.24                            | 6a, 6b, 7b<br>6a, 6b, 7a         |                                          |             |
| 8                            | 38.8, C                    |                                               |                                  |                                          |             |
| 9                            | 49.2, CH                   | 1.70, br s                                    | 11                               | 1, 10, 11, 19, 30                        | 18, 19      |
| 10                           | 39.1, C                    |                                               |                                  |                                          |             |
| 11                           | 67.5, CH                   | 4.50, br s                                    | 9, 12a, 12b                      | 9, 10, 13                                | 1, 19       |
| 12                           | 35.5, CH <sub>2</sub>      | a: 2.37<br>b: 2.00                            | 11, 12b, 13<br>11, 12a, 13       | 11, 14<br>13                             |             |
| 13                           | 44.0, CH                   | 3.04, br d (11.5)                             | 12a, 12b                         | 12, 14, 17, 18, 20                       | 15a, 16, 30 |
| 14                           | 48.7, C                    |                                               |                                  |                                          |             |
| 15                           | 39.1, CH <sub>2</sub>      | a: 2.17<br>b: 1.33                            | 15b, 16<br>15a, 16               | 14, 18<br>13, 14, 16, 17                 | 13          |
| 16                           | 74.3, CH                   | 5.89, br d (8.5)                              | 15a, 15b                         | 14, 17, 20, 16- <u>COCH</u> <sub>3</sub> | 13          |
| 17                           | 150.3, C                   |                                               |                                  |                                          |             |
| 18                           | 17.8, CH <sub>3</sub>      | 0.94, s                                       |                                  | 8, 13, 14, 15                            | 9           |
| 19                           | 26.7, CH <sub>3</sub>      | 1.21, s                                       |                                  | 1, 5, 9, 10                              | 4, 9, 11    |
| 20                           | 130.0, C                   |                                               |                                  |                                          |             |
| 21                           | 174.5, C                   |                                               |                                  |                                          |             |
| 22                           | 28.8, CH <sub>2</sub>      | 2.45                                          | 23a, 23b                         | 17, 20, 21, 23, 24                       | 24          |
| 23                           | 28.3, CH <sub>2</sub>      | a: 2.17<br>b: 2.08                            | 22, 23b, 24<br>22, 23a, 24       | 24, 25<br>24, 25                         |             |
| 24                           | 122.8, CH                  | 5.09, br t (7.0)                              | 23a, 23b, 26, 27                 | 22, 23, 26, 27                           | 22, 26      |
| 25                           | 132.8, C                   |                                               |                                  |                                          |             |
| 26                           | 25.7, CH <sub>3</sub>      | 1.67, br s                                    | 24                               | 24, 25, 27                               | 24          |
| 27                           | 17.8, CH <sub>3</sub>      | 1.59, br s                                    | 24                               | 24, 25, 26                               |             |
| 28                           | 12.5, CH <sub>3</sub>      | 1.12, d (6.6)                                 | 4                                | 3, 4, 5                                  | 5           |
| 30                           | 23.5, CH <sub>3</sub>      | 1.28, s                                       |                                  | 7, 8, 9, 14                              | 5, 13       |
| 16- <u>COCH</u> <sub>3</sub> | 170.5, C                   |                                               |                                  |                                          |             |
| 16-CO <u>CH</u> <sub>3</sub> | 20.5, CH <sub>3</sub>      | 1.96, s                                       |                                  | 16- <u>COCH</u> <sub>3</sub>             |             |

<sup>a</sup>The indiscernible signals from overlap or the complex multiplicity are reported without designating multiplicity.

**Table S4** NMR data for **6** ( $^1\text{H}$  for 600 MHz and  $^{13}\text{C}$  for 150 MHz in  $\text{CDCl}_3$ ).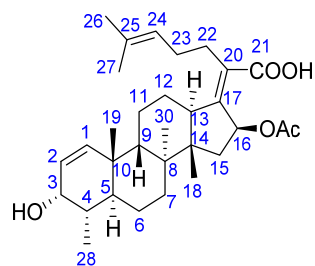**6**

| Position             | $\delta_{\text{C}}$ , type | $\delta_{\text{H}}$ (J in Hz) <sup>a</sup> | $^1\text{H}$ - $^1\text{H}$ COSY       | HMBC                                     | NOESY        | $\delta_{\text{H}}$ (J in Hz) <sup>b</sup> |
|----------------------|----------------------------|--------------------------------------------|----------------------------------------|------------------------------------------|--------------|--------------------------------------------|
| 1                    | 141.1, CH                  | 6.15, d (9.8)                              | 2                                      | 3, 5, 9, 10                              | 11a, 19      | 6.15, d (10.0)                             |
| 2                    | 126.9, CH                  | 5.61, br d (9.8)                           | 1, 3                                   | 3, 4, 10                                 |              | 5.62, dd (10.0, 4.3)                       |
| 3                    | 68.8, CH                   | 3.94, br s                                 | 2, 4                                   | 1, 2, 5                                  | 28           | 3.94, t (4.4)                              |
| 4                    | 33.1, CH                   | 1.95                                       | 3, 5, 28                               | 5, 10, 28                                | 19           | 1.97                                       |
| 5                    | 38.3, CH                   | 1.83, br t (11.9)                          | 4, 6a, 6b                              | 1, 3, 4, 10, 19                          | 28, 30       | 1.83, td (11.6, 1.9)                       |
| 6                    | 19.1, $\text{CH}_2$        | a: 1.60<br>b: 1.11                         | 5, 6b, 7a, 7b<br>5, 6a, 7a, 7b         | 5, 10<br>4, 5, 7, 10                     | 28           | a: 1.61<br>b: 1.12                         |
| 7                    | 33.5, $\text{CH}_2$        | a: 1.91<br>b: 1.24                         | 6a, 6b, 7b<br>6a, 6b, 7a               | 5, 6, 14, 30<br>6, 8, 9, 30              |              | a: 1.92<br>b: 1.25                         |
| 8                    | 38.6, C                    |                                            |                                        |                                          |              |                                            |
| 9                    | 44.2, CH                   | 1.55, br d (13.3)                          | 11a, 11b                               | 1, 10, 11, 19, 30                        | 18, 19       | 1.56, dd (12.9, 3.1)                       |
| 10                   | 38.3, C                    |                                            |                                        |                                          |              |                                            |
| 11                   | 24.8, $\text{CH}_2$        | a: 1.72<br>b: 1.35                         | 9, 11b, 12a, 12b<br>9, 11a, 12a, 12b   | 10<br>9                                  | 1, 19<br>30  | a: 1.73<br>b: 1.36                         |
| 12                   | 26.2, $\text{CH}_2$        | a: 2.28, br d (11.1)<br>b: 1.68            | 11a, 11b, 12b, 13<br>11a, 11b, 12a, 13 | 9, 14<br>11, 13                          |              | a: 2.29<br>b: 1.69                         |
| 13                   | 49.0, CH                   | 2.54                                       | 12a, 12b                               | 12, 14, 17, 18                           | 30           | 2.55                                       |
| 14                   | 48.5, C                    |                                            |                                        |                                          |              |                                            |
| 15                   | 39.2, $\text{CH}_2$        | a: 2.04<br>b: 1.30                         | 15b, 16<br>15a, 16                     | 8, 14, 18<br>13, 14, 16, 17, 18          |              | a: 2.05<br>b: 1.30                         |
| 16                   | 74.2, CH                   | 5.84, br d (7.6)                           | 15a, 15b                               | 14, 17, 20, 16-COCH <sub>3</sub>         |              | 5.84, br d (8.3)                           |
| 17                   | 150.4, C                   |                                            |                                        |                                          |              |                                            |
| 18                   | 18.3, $\text{CH}_3$        | 0.94, s                                    |                                        | 8, 13, 14, 15                            | 9            | 0.95, s                                    |
| 19                   | 26.2, $\text{CH}_3$        | 0.94, s                                    |                                        | 1, 5, 9, 10                              | 1, 4, 9, 11a | 0.95, s                                    |
| 20                   | 129.6, C                   |                                            |                                        |                                          |              |                                            |
| 21                   | 173.8, C                   |                                            |                                        |                                          |              |                                            |
| 22                   | 28.6, $\text{CH}_2$        | a: 2.51<br>b: 2.43                         | 22b, 23a, 23b<br>22a, 23a, 23b         | 17, 20, 21, 23, 24<br>17, 20, 21, 23, 24 | 24<br>24     | a: 2.53<br>b: 2.44                         |
| 23                   | 28.3, $\text{CH}_2$        | a: 2.12<br>b: 2.06                         | 22a, 22b, 23b, 24<br>22a, 22b, 23a, 24 | 20, 22, 24, 25<br>20, 22, 24, 25         |              | a: 2.13<br>b: 2.07                         |
| 24                   | 123.0, CH                  | 5.09, br s                                 | 23a, 23b, 26, 27                       | 23, 26, 27                               | 22a, 22b, 26 | 5.11, t (7.1)                              |
| 25                   | 132.6, C                   |                                            |                                        |                                          |              |                                            |
| 26                   | 25.7, $\text{CH}_3$        | 1.68, br s                                 | 24                                     | 24, 25, 27                               | 24           | 1.68, br s                                 |
| 27                   | 17.7, $\text{CH}_3$        | 1.59, br s                                 | 24                                     | 24, 25, 26                               |              | 1.61, br s                                 |
| 28                   | 14.2, $\text{CH}_3$        | 0.98, d (6.0)                              | 4                                      | 3, 4, 5                                  | 3, 5, 6a     | 0.98, d (6.8)                              |
| 30                   | 21.7, $\text{CH}_3$        | 1.01, s                                    |                                        | 7, 8, 9, 14                              | 5, 13, 11b   | 1.02, s                                    |
| 16-COCH <sub>3</sub> | 170.6, C                   |                                            |                                        |                                          |              |                                            |
| 16-COCH <sub>3</sub> | 20.6, $\text{CH}_3$        | 1.96, s                                    |                                        | 16-COCH <sub>3</sub>                     |              | 1.98, s                                    |

<sup>a</sup>The indiscernible signals from overlap or the complex multiplicity are reported without designating multiplicity.

The  $^1\text{H}$  NMR data of **6** obtained *via* chemical derivatization were measured at low concentrations of the compound in  $\text{CDCl}_3$ .

**Table S5** NMR data for **9** ( $^1\text{H}$  for 600 MHz and  $^{13}\text{C}$  for 150 MHz in  $\text{CDCl}_3$ ).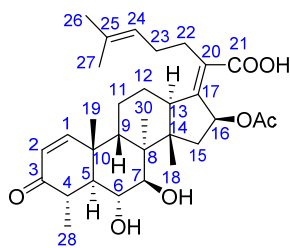**9**

| Position                     | $\delta_{\text{C}}$ , type | $\delta_{\text{H}}$ (J in Hz) <sup>a</sup> | $^1\text{H}$ - $^1\text{H}$ COSY       | HMBC                                     | NOESY          |
|------------------------------|----------------------------|--------------------------------------------|----------------------------------------|------------------------------------------|----------------|
| 1                            | 157.4, CH                  | 7.28, d (10.1)                             | 2                                      | 3, 5, 9, 10, 19                          | 11a, 11b       |
| 2                            | 127.9, CH                  | 5.85, d (10.1)                             | 1                                      | 4, 10                                    |                |
| 3                            | 203.2, C                   |                                            |                                        |                                          |                |
| 4                            | 42.5, CH                   | 2.73, dq (12.0, 6.7)                       | 5, 28                                  | 3, 5, 6, 10, 28                          | 6, 19          |
| 5                            | 49.2, CH                   | 1.96                                       | 4, 6                                   | 1, 4, 6, 7, 10, 19, 28                   | 7, 28, 30      |
| 6                            | 74.2, CH                   | 3.71, dd (11.1, 8.2)                       | 5, 7                                   | 5, 7, 10                                 | 4, 19          |
| 7                            | 87.1, CH                   | 3.51, d (8.2)                              | 6                                      | 5, 6, 8, 9, 30                           | 5              |
| 8                            | 45.1, C                    |                                            |                                        |                                          |                |
| 9                            | 42.7, CH                   | 1.95                                       | 11a, 11b                               | 8, 10, 11, 30                            | 18             |
| 10                           | 40.3, C                    |                                            |                                        |                                          |                |
| 11                           | 24.5, CH <sub>2</sub>      | a: 1.71<br>b: 1.54 qd (13.3, 4.1)          | 9, 11b, 12a, 12b<br>9, 11a, 12a, 12b   |                                          | 1<br>1, 13     |
| 12                           | 25.8, CH <sub>2</sub>      | a: 2.34<br>b: 1.80                         | 11a, 11b, 12b, 13<br>11a, 11b, 12a, 13 | 11<br>13, 14, 17                         |                |
| 13                           | 50.7, CH                   | 2.60, br d (10.9)                          | 12a, 12b                               | 14, 17, 18, 20                           | 11b, 16, 30    |
| 14                           | 47.7, C                    |                                            |                                        |                                          |                |
| 15                           | 40.9, CH <sub>2</sub>      | a: 2.20, dd (14.2, 8.5)<br>b: 1.81         | 15b, 16<br>15a, 16                     | 8, 14, 18<br>13, 14, 16, 17, 18          | 30             |
| 16                           | 74.2, CH                   | 5.89, br d (8.5)                           | 15a, 15b                               | 14, 17, 20, 16- <u>COCH</u> <sub>3</sub> | 13, 30         |
| 17                           | 148.8, C                   |                                            |                                        |                                          |                |
| 18                           | 20.8, CH <sub>3</sub>      | 1.22, s                                    |                                        | 8, 13, 14, 15                            | 9              |
| 19                           | 27.5, CH <sub>3</sub>      | 1.23, s                                    |                                        | 1, 5, 9, 10                              | 4, 6           |
| 20                           | 130.4, C                   |                                            |                                        |                                          |                |
| 21                           | 173.8, C                   |                                            |                                        |                                          |                |
| 22                           | 28.6, CH <sub>2</sub>      | a: 2.51<br>b: 2.44                         | 22b, 23a, 23b<br>22a, 23a, 23b         | 17, 20, 21, 23, 24<br>17, 20, 21, 23, 24 | 24<br>24       |
| 23                           | 28.3, CH <sub>2</sub>      | a: 2.13<br>b: 2.07                         | 22a, 22b, 23b, 24<br>22a, 22b, 23a, 24 | 20, 22, 24, 25<br>20, 22, 24, 25         |                |
| 24                           | 122.9, CH                  | 5.10, br t (7.4)                           | 23a, 23b, 26, 27                       | 23, 26, 27                               | 22a, 22b, 26   |
| 25                           | 132.7, C                   |                                            |                                        |                                          |                |
| 26                           | 25.7, CH <sub>3</sub>      | 1.68, br s                                 | 24                                     | 24, 25, 27                               | 24             |
| 27                           | 17.7, CH <sub>3</sub>      | 1.60, br s                                 | 24                                     | 24, 25, 26                               |                |
| 28                           | 17.3, CH <sub>3</sub>      | 1.42, d (6.9)                              | 4                                      | 3, 4, 5                                  | 5              |
| 30                           | 21.4, CH <sub>3</sub>      | 1.10, s                                    |                                        | 7, 8, 9, 14                              | 5, 13, 15a, 16 |
| 16- <u>COCH</u> <sub>3</sub> | 171.0, C                   |                                            |                                        |                                          |                |
| 16-CO <u>CH</u> <sub>3</sub> | 20.7, CH <sub>3</sub>      | 1.98, s                                    |                                        | 16- <u>COCH</u> <sub>3</sub>             |                |

<sup>a</sup>The indiscernible signals from overlap or the complex multiplicity are reported without designating multiplicity.

**Table S6** NMR data for **10** ( $^1\text{H}$  for 600 MHz and  $^{13}\text{C}$  for 150 MHz in  $\text{CDCl}_3$ ).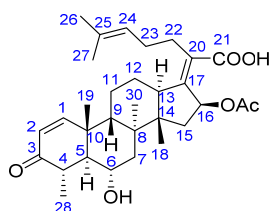**10**

| Position                     | $\delta_c$ , type     | $\delta_H$ ( $J$ in Hz) <sup>a</sup> | $^1\text{H}$ - $^1\text{H}$ COSY       | HMBC                                     | NOESY           |
|------------------------------|-----------------------|--------------------------------------|----------------------------------------|------------------------------------------|-----------------|
| 1                            | 157.6, CH             | 7.27, d (10.3)                       | 2                                      | 3, 5, 9, 10                              |                 |
| 2                            | 127.7, CH             | 5.86, d (10.3)                       | 1                                      | 4, 10                                    |                 |
| 3                            | 203.1, C              |                                      |                                        |                                          |                 |
| 4                            | 43.0, CH              | 2.70, dq (11.9, 6.9)                 | 5, 28                                  | 3, 5, 6, 10, 28                          | 19              |
| 5                            | 51.7, CH              | 2.16, t (11.6)                       | 4, 6                                   | 1, 3, 4, 6, 7, 10, 19, 28                | 30              |
| 6                            | 69.1, CH              | 3.91, ddd (10.7, 8.2, 6.7)           | 5, 7a, 7b                              | 5, 7, 10                                 | 9, 19           |
| 7                            | 45.6, CH <sub>2</sub> | a: 2.32, dd (13.8, 6.7)<br>b: 1.17   | 6, 7b<br>6, 7a                         | 5, 6, 8, 9, 14, 30<br>6, 30              | 18              |
| 8                            | 39.2, C               |                                      |                                        |                                          |                 |
| 9                            | 44.0, CH              | 1.65, dd (12.7, 2.8)                 | 11a, 11b                               | 1, 8, 10, 11, 19, 30                     | 6, 18           |
| 10                           | 39.8, C               |                                      |                                        |                                          |                 |
| 11                           | 24.6, CH <sub>2</sub> | a: 1.74<br>b: 1.46                   | 9, 11b, 12a, 12b<br>9, 11a, 12a, 12b   | 8, 9<br>8, 9, 12, 13                     |                 |
| 12                           | 26.0, CH <sub>2</sub> | a: 2.36<br>b: 1.72                   | 11a, 11b, 12b, 13<br>11a, 11b, 12a, 13 | 11, 13                                   | 18              |
| 13                           | 48.7, CH              | 2.57, br d (11.6)                    | 12a, 12b                               | 12, 14, 17, 18, 20                       | 16, 30          |
| 14                           | 48.2, C               |                                      |                                        |                                          |                 |
| 15                           | 39.1, CH <sub>2</sub> | a: 2.06<br>b: 1.35, br d (14.2)      | 15b, 16<br>15a, 16                     | 8, 14, 18<br>13, 16, 17, 18              | 30<br>18        |
| 16                           | 73.9, CH              | 5.87, br d (8.2)                     | 15a, 15b                               | 14, 17, 20, 16- <u>COCH</u> <sub>3</sub> | 13              |
| 17                           | 149.7, C              |                                      |                                        |                                          |                 |
| 18                           | 18.3, CH <sub>3</sub> | 1.01, s                              |                                        | 8, 13, 14, 15                            | 7a, 9, 12b, 15b |
| 19                           | 27.3, CH <sub>3</sub> | 1.18, s                              |                                        | 1, 5, 9, 10                              | 4, 6            |
| 20                           | 129.9, C              |                                      |                                        |                                          |                 |
| 21                           | 172.9, C              |                                      |                                        |                                          |                 |
| 22                           | 28.6, CH <sub>2</sub> | a: 2.51<br>b: 2.45                   | 22b, 23a, 23b<br>22a, 23a, 23b         | 17, 20, 21, 23, 24<br>17, 20, 21, 23, 24 | 24<br>24        |
| 23                           | 28.3, CH <sub>2</sub> | a: 2.14<br>b: 2.08                   | 22a, 22b, 23b, 24<br>22a, 22b, 23a, 24 | 20, 22, 24, 25<br>20, 22, 24, 25         |                 |
| 24                           | 122.8, CH             | 5.10, br t (6.9)                     | 23a, 23b, 26, 27                       | 23, 26, 27                               | 22a, 22b, 26    |
| 25                           | 132.8, C              |                                      |                                        |                                          |                 |
| 26                           | 25.7, CH <sub>3</sub> | 1.68, br s                           | 24                                     | 24, 25, 27                               | 24              |
| 27                           | 17.7, CH <sub>3</sub> | 1.60, br s                           | 24                                     | 24, 25, 26                               |                 |
| 28                           | 17.0, CH <sub>3</sub> | 1.43, d (6.9)                        | 4                                      | 3, 4, 5                                  |                 |
| 30                           | 21.0, CH <sub>3</sub> | 1.10, s                              |                                        | 7, 8, 9, 14                              | 5, 13, 15a      |
| 16- <u>COCH</u> <sub>3</sub> | 170.5, C              |                                      |                                        |                                          |                 |
| 16- <u>COCH</u> <sub>3</sub> | 20.6, CH <sub>3</sub> | 1.98, s                              |                                        | 16- <u>COCH</u> <sub>3</sub>             |                 |

<sup>a</sup>The indiscernible signals from overlap or the complex multiplicity are reported without designating multiplicity.



**Table S7** NMR data for **11** ( $^1\text{H}$  for 400 MHz and  $^{13}\text{C}$  for 100 MHz in  $\text{CDCl}_3$ ).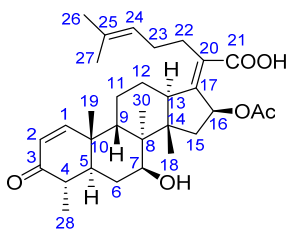**11**

| Position                     | $\delta_{\text{C}}$ , type | $\delta_{\text{H}}$ ( $J$ in Hz) <sup>a</sup>   | $^1\text{H}$ - $^1\text{H}$ COSY       | HMBC                                     | ROESY         |
|------------------------------|----------------------------|-------------------------------------------------|----------------------------------------|------------------------------------------|---------------|
| 1                            | 159.2, CH                  | 7.29, d (10.2)                                  | 2                                      | 3, 5, 10                                 | 11a, 11b      |
| 2                            | 127.6, CH                  | 5.81, d (10.2)                                  | 1                                      | 4, 10                                    |               |
| 3                            | 202.4, C                   |                                                 |                                        |                                          |               |
| 4                            | 42.4, CH                   | 2.44                                            | 5, 28                                  |                                          | 19            |
| 5                            | 44.5, CH                   | 1.93                                            | 4, 6a, 6b                              | 1, 4, 6, 7, 10, 19                       | 28, 30        |
| 6                            | 32.9, CH <sub>2</sub>      | a: 1.98<br>b: 1.39                              | 5, 6b, 7<br>5, 6a, 7                   | 7                                        |               |
| 7                            | 79.7, CH                   | 3.86, dd (8.7, 6.9)                             | 6a, 6b                                 | 6, 9, 30                                 | 30            |
| 8                            | 45.0, C                    |                                                 |                                        |                                          |               |
| 9                            | 43.0, CH                   | 2.03                                            | 11a, 11b                               | 8, 10, 19, 30                            | 18, 19        |
| 10                           | 39.0, C                    |                                                 |                                        |                                          |               |
| 11                           | 24.8, CH <sub>2</sub>      | a: 1.82<br>b: 1.51, qd (14.4, 4.0)              | 9, 11b, 12a, 12b<br>9, 11a, 12a, 12b   | 8, 13                                    | 1<br>1        |
| 12                           | 25.8, CH <sub>2</sub>      | a: 2.33<br>b: 1.80                              | 11a, 11b, 12b, 13<br>11a, 11b, 12a, 13 | 14<br>13                                 |               |
| 13                           | 50.8, CH                   | 2.58, br d (10.4)                               | 12a, 12b                               | 12, 14, 17, 18, 20                       | 16, 30        |
| 14                           | 48.0, C                    |                                                 |                                        |                                          |               |
| 15                           | 40.7, CH <sub>2</sub>      | a: 2.18, dd (14.4, 8.8)<br>b: 1.73, br d (14.4) | 15b, 16<br>15a, 16                     | 14, 18<br>13, 14, 16, 17, 18             | 30            |
| 16                           | 74.3, CH                   | 5.86, br d (8.4)                                | 15a, 15b                               | 14, 17, 20, 16- <u>COCH</u> <sub>3</sub> | 13            |
| 17                           | 149.1, C                   |                                                 |                                        |                                          |               |
| 18                           | 21.2, CH <sub>3</sub>      | 1.21, s                                         |                                        | 8, 13, 14, 15                            | 9             |
| 19                           | 25.7, CH <sub>3</sub>      | 1.22, s                                         |                                        | 1, 5, 9, 10                              | 4, 9          |
| 20                           | 130.4, C                   |                                                 |                                        |                                          |               |
| 21                           | 174.5, C                   |                                                 |                                        |                                          |               |
| 22                           | 28.6, CH <sub>2</sub>      | 2.46                                            | 23                                     | 17, 20, 21, 23, 24                       | 24            |
| 23                           | 28.2, CH <sub>2</sub>      | 2.09                                            | 22, 24                                 | 22, 24, 25                               |               |
| 24                           | 122.9, CH                  | 5.09, br t (7.1)                                | 23, 26, 27                             | 23, 26, 27                               | 22, 26        |
| 25                           | 132.6, C                   |                                                 |                                        |                                          |               |
| 26                           | 25.7, CH <sub>3</sub>      | 1.67, br s                                      | 24                                     | 24, 25, 27                               | 24            |
| 27                           | 17.7, CH <sub>3</sub>      | 1.59, br s                                      | 24                                     | 24, 25, 26                               |               |
| 28                           | 12.9, CH <sub>3</sub>      | 1.13, d (6.7)                                   | 4                                      | 3, 4, 5                                  | 5             |
| 30                           | 21.2, CH <sub>3</sub>      | 0.98, s                                         |                                        | 7, 8, 9, 14                              | 5, 7, 13, 15a |
| 16- <u>COCH</u> <sub>3</sub> | 170.8, C                   |                                                 |                                        |                                          |               |
| 16- <u>COCH</u> <sub>3</sub> | 20.6, CH <sub>3</sub>      | 1.95, s                                         |                                        | 16- <u>COCH</u> <sub>3</sub>             |               |

<sup>a</sup>The indiscernible signals due to overlap or the complex multiplicity are reported without designating multiplicity.

**Table S8** NMR data for **12** ( $^1\text{H}$  for 400 MHz and  $^{13}\text{C}$  for 100 MHz in  $\text{CDCl}_3$ ).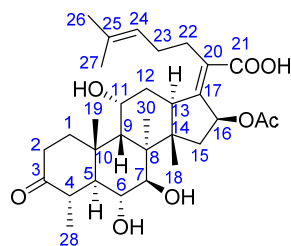**12**

| Position            | $\delta_{\text{C}}$ , type | $\delta_{\text{H}}$ ( $J$ in Hz) <sup>a</sup> | $^1\text{H}$ - $^1\text{H}$ COSY | HMBC                            | ROESY             |
|---------------------|----------------------------|-----------------------------------------------|----------------------------------|---------------------------------|-------------------|
| 1                   | 33.8, $\text{CH}_2$        | a: 2.58<br>b: 1.80                            | 1b, 2a, 2b<br>1a, 2a, 2b         | 19<br>5, 10, 19                 | 30                |
| 2                   | 34.9, $\text{CH}_2$        | a: 2.58<br>b: 2.36                            | 1a, 1b, 2b<br>1a, 1b, 2a         | 3                               |                   |
| 3                   | 217.8, C                   |                                               |                                  |                                 |                   |
| 4                   | 45.1, CH                   | 2.50                                          | 5, 28                            |                                 | 6, 19             |
| 5                   | 48.9, CH                   | 1.87, t (10.6)                                | 4, 6                             | 6, 7, 19                        | 7, 28, 30         |
| 6                   | 73.9, CH                   | 3.53, dd (10.4, 8.3)                          | 5, 7                             | 7                               | 4, 9, 19          |
| 7                   | 87.3, CH                   | 3.48, d (8.2)                                 | 6                                | 6, 30                           | 5, 30             |
| 8                   | 46.4, C                    |                                               |                                  |                                 |                   |
| 9                   | 46.2, CH                   | 1.78                                          | 11                               | 1, 5, 8, 10, 19, 30             | 6, 18, 19         |
| 10                  | 38.5, C                    |                                               |                                  |                                 |                   |
| 11                  | 67.8, CH                   | 4.36, br s                                    | 9, 12a, 12b                      | 8, 9, 13                        | 19                |
| 12                  | 36.3, $\text{CH}_2$        | a: 2.28<br>b: 1.99                            | 11, 12b, 13<br>11, 12a, 13       | 14                              | 22<br>18          |
| 13                  | 46.3, CH                   | 3.06, br d (12.7)                             | 12a, 12b                         | 12, 14, 17, 20                  | 16, 30            |
| 14                  | 48.3, C                    |                                               |                                  |                                 |                   |
| 15                  | 40.8, $\text{CH}_2$        | a: 2.31<br>b: 1.79                            | 15b, 16<br>15a, 16               | 14<br>8                         | 30<br>18          |
| 16                  | 74.5, CH                   | 5.91, br d (8.3)                              | 15a, 15b                         | 14, 17, 20, 16- $\text{COCH}_3$ | 13                |
| 17                  | 149.9, C                   |                                               |                                  |                                 |                   |
| 18                  | 20.4, $\text{CH}_3$        | 1.17, s                                       |                                  | 8, 13, 14, 15                   | 9, 12b, 15b       |
| 19                  | 23.8, $\text{CH}_3$        | 1.02, s                                       |                                  | 1, 5, 9, 10                     | 4, 6, 9, 11       |
| 20                  | 130.2, C                   |                                               |                                  |                                 |                   |
| 21                  | 173.8, C                   |                                               |                                  |                                 |                   |
| 22                  | 28.8, $\text{CH}_2$        | 2.45                                          | 23a, 23b                         | 17, 20, 21, 23, 24,             | 12a, 24           |
| 23                  | 28.3, $\text{CH}_2$        | a: 2.14<br>b: 2.08                            | 22, 23b, 24<br>22, 23a, 24       |                                 |                   |
| 24                  | 122.9, CH                  | 5.09, br t (6.9)                              | 23a, 23b, 26, 27                 | 26, 27                          | 22, 26            |
| 25                  | 132.7, C                   |                                               |                                  |                                 |                   |
| 26                  | 25.7, $\text{CH}_3$        | 1.67, br s                                    | 24                               | 24, 25, 27                      | 24                |
| 27                  | 17.8, $\text{CH}_3$        | 1.59, br s                                    | 24                               | 24, 25, 26                      |                   |
| 28                  | 18.8, $\text{CH}_3$        | 1.31, d (6.9)                                 | 4                                | 3, 4, 5                         | 5                 |
| 30                  | 25.8, $\text{CH}_3$        | 1.45, s                                       |                                  | 7, 8, 9, 14                     | 1a, 5, 7, 13, 15a |
| 16- $\text{COCH}_3$ | 171.1, C                   |                                               |                                  |                                 |                   |
| 16- $\text{COCH}_3$ | 20.7, $\text{CH}_3$        | 1.97, s                                       |                                  | 16- $\text{COCH}_3$             |                   |

<sup>a</sup>The indiscernible signals from overlap or the complex multiplicity are reported without designating multiplicity.

**Table S9** NMR data for **13** ( $^1\text{H}$  for 600 MHz and  $^{13}\text{C}$  for 150 MHz in  $\text{CDCl}_3$ ).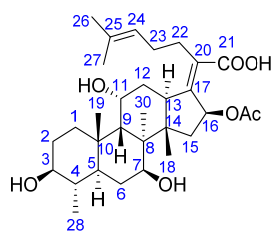**13**

| Position             | $\delta_{\text{C}}$ , type | $\delta_{\text{H}}$ ( $J$ in Hz) <sup>a</sup> | $^1\text{H}$ - $^1\text{H}$ COSY | HMBC                                 | NOESY         |
|----------------------|----------------------------|-----------------------------------------------|----------------------------------|--------------------------------------|---------------|
| 1                    | 34.8, CH <sub>2</sub>      | a: 1.97<br>b: 1.77                            | 1b, 2a, 2b<br>1a, 2a, 2b         | 2, 10, 19<br>2, 3, 5, 10             |               |
| 2                    | 31.6, CH <sub>2</sub>      | a: 1.91<br>b: 1.66                            | 1a, 1b, 2b, 3<br>1a, 1b, 2a, 3   | 3<br>1, 3                            |               |
| 3                    | 76.6, CH                   | 3.13, td (10.8, 4.9)                          | 2a, 2b, 4                        | 2, 4, 5, 28                          | 28            |
| 4                    | 39.1, CH                   | 1.48                                          | 3, 5, 28                         | 3, 5                                 | 19            |
| 5                    | 42.6, CH                   | 1.41, td (11.8, 4.0)                          | 4, 6a, 6b                        | 3, 4, 6, 7, 10, 19                   | 7, 28, 30     |
| 6                    | 33.8, CH <sub>2</sub>      | a: 2.03<br>b: 1.16                            | 5, 6b, 7<br>5, 6a, 7             | 5, 7, 8, 10<br>7                     | 19            |
| 7                    | 79.0, CH                   | 3.73, t (6.2)                                 | 6a, 6b                           | 5, 6, 8, 9, 14, 30                   | 5, 30         |
| 8                    | 45.2, C                    |                                               |                                  |                                      |               |
| 9                    | 46.5, CH                   | 1.92, br s                                    | 11                               | 1, 7, 8, 10, 11, 14, 19, 30          | 18, 19        |
| 10                   | 36.8, C                    |                                               |                                  |                                      |               |
| 11                   | 68.6, CH                   | 4.40, br s                                    | 9, 12a, 12b                      | 8, 13                                | 19            |
| 12                   | 35.9, CH <sub>2</sub>      | a: 2.29<br>b: 1.96                            | 11, 12b, 13<br>11, 12a, 13       | 11                                   |               |
| 13                   | 46.4, CH                   | 3.06, br d (11.6)                             | 12a, 12b                         | 12, 14, 17, 18, 20                   | 16, 30        |
| 14                   | 48.6, C                    |                                               |                                  |                                      |               |
| 15                   | 40.3, CH <sub>2</sub>      | a: 2.26<br>b: 1.62, br d (14.4)               | 15b, 16<br>15a, 16               | 8, 14, 18<br>13, 14, 16, 17, 18      | 30<br>18      |
| 16                   | 74.4, CH                   | 5.91, br d (8.4)                              | 15a, 15b                         | 13, 14, 17, 20, 16-COCH <sub>3</sub> | 13            |
| 17                   | 150.5, C                   |                                               |                                  |                                      |               |
| 18                   | 21.3, CH <sub>3</sub>      | 1.17, s                                       |                                  | 8, 13, 14, 15                        | 9, 15b        |
| 19                   | 22.9, CH <sub>3</sub>      | 1.15, s                                       |                                  | 1, 5, 9, 10                          | 4, 6a, 9, 11  |
| 20                   | 130.0, C                   |                                               |                                  |                                      |               |
| 21                   | 173.8, C                   |                                               |                                  |                                      |               |
| 22                   | 28.8, CH <sub>2</sub>      | 2.46                                          | 23a, 23b                         | 17, 20, 21, 23, 24                   | 24            |
| 23                   | 28.3, CH <sub>2</sub>      | a: 2.16<br>b: 2.06                            | 22, 23b, 24<br>22, 23a, 24       | 20, 22, 24, 25<br>20, 22, 24, 25     |               |
| 24                   | 123.0, CH                  | 5.10, br t (6.6)                              | 23a, 23b, 26, 27                 | 23, 26, 27                           | 22, 26        |
| 25                   | 132.7, C                   |                                               |                                  |                                      |               |
| 26                   | 25.7, CH <sub>3</sub>      | 1.67, br s                                    | 24                               | 24, 25, 27                           | 24            |
| 27                   | 17.8, CH <sub>3</sub>      | 1.60, br s                                    | 24                               | 24, 25, 26                           |               |
| 28                   | 15.4, CH <sub>3</sub>      | 0.96, d (6.1)                                 | 4                                | 3, 4, 5                              | 3, 5          |
| 30                   | 23.9, CH <sub>3</sub>      | 1.30, s                                       |                                  | 7, 8, 9, 14                          | 5, 7, 13, 15a |
| 16-COCH <sub>3</sub> | 170.7, C                   |                                               |                                  |                                      |               |
| 16-COCH <sub>3</sub> | 20.6, CH <sub>3</sub>      | 1.97, s                                       |                                  | 16-COCH <sub>3</sub>                 |               |

<sup>a</sup>The indiscernible signals from overlap or the complex multiplicity are reported without designating multiplicity.

**Table S10** NMR data for **14** ( $^1\text{H}$  for 400 MHz and  $^{13}\text{C}$  for 100 MHz in  $\text{CDCl}_3$ ).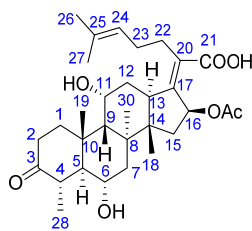**14**

| Position             | $\delta_{\text{C}}$ , type | $\delta_{\text{H}}$ ( $J$ in Hz) <sup>a</sup> | $^1\text{H}$ - $^1\text{H}$ COSY | HMBC                             | ROESY               |
|----------------------|----------------------------|-----------------------------------------------|----------------------------------|----------------------------------|---------------------|
| 1                    | 34.4, CH <sub>2</sub>      | a: 2.58<br>b: 1.89                            | 1b, 2a, 2b<br>1a, 2a, 2b         | 3, 5                             | 5, 30<br>19         |
| 2                    | 36.1, CH <sub>2</sub>      | a: 2.53<br>b: 2.41                            | 1a, 1b, 2b<br>1a, 1b, 2a         | 1, 3<br>1, 3                     | 19                  |
| 3                    | 215.9, C                   |                                               |                                  |                                  |                     |
| 4                    | 46.0, CH                   | 2.49                                          | 5, 28                            |                                  | 6, 19               |
| 5                    | 51.1, CH                   | 2.10                                          | 4, 6                             | 4, 6, 10, 19                     | 1a, 30              |
| 6                    | 69.7, CH                   | 3.79                                          | 5, 7a, 7b                        |                                  | 4, 9, 19, 28        |
| 7                    | 44.7, CH <sub>2</sub>      | a: 2.15<br>b: 1.20, dd (14.0, 5.5)            | 6, 7b<br>6, 7a                   | 9, 14                            | 9, 18               |
| 8                    | 39.9, C                    |                                               |                                  |                                  |                     |
| 9                    | 48.4, CH                   | 1.56, br s                                    | 11                               | 1, 8, 10, 11, 19, 30             | 6, 7a, 12b, 18, 19  |
| 10                   | 37.4, C                    |                                               |                                  |                                  |                     |
| 11                   | 67.6, CH                   | 4.37, br s                                    | 9, 12a, 12b                      | 8, 13                            | 19                  |
| 12                   | 36.2, CH <sub>2</sub>      | a: 2.30, br d (13.2)<br>b: 1.90               | 11, 12b, 13<br>11, 12a, 13       | 14                               | 9, 18               |
| 13                   | 43.8, CH                   | 3.06, br d (11.4)                             | 12a, 12b                         | 12, 14, 17, 18, 20               | 15a, 16, 30         |
| 14                   | 48.4, C                    |                                               |                                  |                                  |                     |
| 15                   | 39.0, CH <sub>2</sub>      | a: 2.20<br>b: 1.36, br d (14.5)               | 15b, 16<br>15a, 16               | 18<br>16                         | 13<br>18            |
| 16                   | 74.2, CH                   | 5.93, br d (8.2)                              | 15a, 15b                         | 14, 17, 20, 16-COCH <sub>3</sub> | 13                  |
| 17                   | 150.1, C                   |                                               |                                  |                                  |                     |
| 18                   | 17.9, CH <sub>3</sub>      | 0.95, s                                       |                                  | 8, 13, 14, 15                    | 7a, 9, 12b, 15b     |
| 19                   | 24.8, CH <sub>3</sub>      | 1.05, s                                       |                                  | 1, 5, 9, 10                      | 1b, 2b, 4, 6, 9, 11 |
| 20                   | 130.2, C                   |                                               |                                  |                                  |                     |
| 21                   | 173.9, C                   |                                               |                                  |                                  |                     |
| 22                   | 28.8, CH <sub>2</sub>      | 2.45                                          | 23                               | 17, 20, 21, 23, 24               | 24                  |
| 23                   | 28.3, CH <sub>2</sub>      | 2.11                                          | 22, 24                           | 24                               |                     |
| 24                   | 122.9, CH                  | 5.09, br t (6.5)                              | 23, 26, 27                       | 26, 27                           | 22, 26              |
| 25                   | 132.7, C                   |                                               |                                  |                                  |                     |
| 26                   | 25.7, CH <sub>3</sub>      | 1.67, br s                                    | 24                               | 24, 25, 27                       | 24                  |
| 27                   | 17.8, CH <sub>3</sub>      | 1.59, br s                                    | 24                               | 24, 25, 26                       |                     |
| 28                   | 16.9, CH <sub>3</sub>      | 1.29, d (6.6)                                 | 4                                | 3, 4, 5                          | 6                   |
| 30                   | 24.2, CH <sub>3</sub>      | 1.41, s                                       |                                  | 7, 8, 9, 14                      | 1a, 5, 13           |
| 16-COCH <sub>3</sub> | 170.7, C                   |                                               |                                  |                                  |                     |
| 16-COCH <sub>3</sub> | 20.6, CH <sub>3</sub>      | 1.97, s                                       |                                  | 16-COCH <sub>3</sub>             |                     |

<sup>a</sup>The indiscernible signals from overlap or the complex multiplicity are reported without designating multiplicity.

**Table S11** NMR data for **15** ( $^1\text{H}$  for 400 MHz and  $^{13}\text{C}$  for 100 MHz in  $\text{CDCl}_3$ ).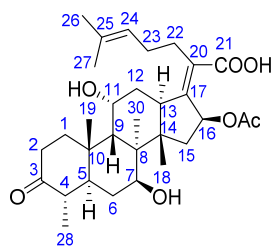**15**

| Position            | $\delta_{\text{C}}$ , type | $\delta_{\text{H}}$ ( $J$ in Hz) <sup>a</sup> | $^1\text{H}$ - $^1\text{H}$ COSY | HMBC                             | ROESY       |
|---------------------|----------------------------|-----------------------------------------------|----------------------------------|----------------------------------|-------------|
| 1                   | 35.7, $\text{CH}_2$        | a: 2.39<br>b: 1.99                            | 1b, 2<br>1a, 2                   |                                  |             |
| 2                   | 38.0, $\text{CH}_2$        | 2.46                                          | 1a, 1b                           | 3                                | 19          |
| 3                   | 213.5, C                   |                                               |                                  |                                  |             |
| 4                   | 45.6, CH                   | 2.35                                          | 5, 28                            | 2                                | 19          |
| 5                   | 44.5, CH                   | 1.82, td (11.8, 4.0)                          | 4, 6a, 6b                        |                                  | 7, 28, 30   |
| 6                   | 34.5, $\text{CH}_2$        | a: 1.99<br>b: 1.29                            | 5, 6b, 7<br>5, 6a, 7             |                                  |             |
| 7                   | 78.9, CH                   | 3.76, t (6.5)                                 | 6a, 6b                           | 5, 8, 30                         | 5, 30       |
| 8                   | 45.4, C                    |                                               |                                  |                                  |             |
| 9                   | 46.4, CH                   | 2.01, br s                                    | 11                               | 1, 7, 8, 10, 11, 12, 14, 19, 30  | 18, 19      |
| 10                  | 36.8, C                    |                                               |                                  |                                  |             |
| 11                  | 68.4, CH                   | 4.44, br s                                    | 9, 12a, 12b                      | 8, 13                            | 19          |
| 12                  | 36.2, $\text{CH}_2$        | a: 2.29<br>b: 1.99                            | 11, 12b, 13<br>11, 12a, 13       | 9, 11, 13, 14                    |             |
| 13                  | 46.3, CH                   | 3.07, br d (11.3)                             | 12a, 12b                         | 12, 14, 17, 18, 20               | 16, 30      |
| 14                  | 48.5, C                    |                                               |                                  |                                  |             |
| 15                  | 40.3, $\text{CH}_2$        | a: 2.28<br>b: 1.65                            | 15b, 16<br>15a, 16               | 13, 14, 18<br>13, 14, 16, 17, 18 |             |
| 16                  | 74.4, CH                   | 5.91, br d (8.4)                              | 15a, 15b                         | 14, 17, 20, 16- $\text{COCH}_3$  | 13          |
| 17                  | 150.2, C                   |                                               |                                  |                                  |             |
| 18                  | 21.1, $\text{CH}_3$        | 1.19, s                                       |                                  | 8, 13, 14, 15                    | 9           |
| 19                  | 22.3, $\text{CH}_3$        | 1.29, s                                       |                                  | 1, 5, 9, 10                      | 2, 4, 9, 11 |
| 20                  | 130.4, C                   |                                               |                                  |                                  |             |
| 21                  | 174.3, C                   |                                               |                                  |                                  |             |
| 22                  | 28.7, $\text{CH}_2$        | 2.45                                          | 23                               | 17, 20, 21, 23, 24               | 24          |
| 23                  | 28.3, $\text{CH}_2$        | 2.11                                          | 22, 24                           | 24, 25                           |             |
| 24                  | 123.0, CH                  | 5.09, br t (7.0)                              | 23, 26, 27                       | 26, 27                           | 22, 26      |
| 25                  | 132.7, C                   |                                               |                                  |                                  |             |
| 26                  | 25.7, $\text{CH}_3$        | 1.67, br s                                    | 24                               | 24, 25, 27                       | 24          |
| 27                  | 17.8, $\text{CH}_3$        | 1.59, br s                                    | 24                               | 24, 25, 26                       |             |
| 28                  | 12.3, $\text{CH}_3$        | 1.01, d (6.6)                                 | 4                                | 3, 4, 5                          | 5           |
| 30                  | 24.0, $\text{CH}_3$        | 1.29, s                                       |                                  | 7, 8, 9, 14                      | 5, 7, 13    |
| 16- $\text{COCH}_3$ | 170.8, C                   |                                               |                                  |                                  |             |
| 16- $\text{COCH}_3$ | 20.6, $\text{CH}_3$        | 1.96, s                                       |                                  | 16- $\text{COCH}_3$              |             |

<sup>a</sup>The indiscernible signals from overlap or the complex multiplicity are reported without designating multiplicity.

**Table S12** NMR data for **17** ( $^1\text{H}$  for 600 MHz and  $^{13}\text{C}$  for 150 MHz in  $\text{CDCl}_3$ ).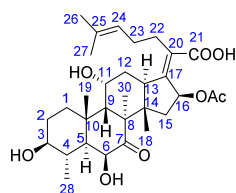**17**

| Position                     | $\delta_{\text{C}}$ , type | $\delta_{\text{H}}$ ( $J$ in Hz) <sup>a</sup> | $^1\text{H}$ - $^1\text{H}$ COSY | HMBC                                         | ROESY <sup>b</sup> |
|------------------------------|----------------------------|-----------------------------------------------|----------------------------------|----------------------------------------------|--------------------|
| 1                            | 35.5, CH <sub>2</sub>      | a: 1.97<br>b: 1.74                            | 1b, 2a, 2b<br>1a, 2a, 2b         | 2, 3, 19<br>2, 3, 5                          | 3<br>11            |
| 2                            | 31.6, CH <sub>2</sub>      | a: 1.95<br>b: 1.72                            | 1a, 1b, 2b, 3<br>1a, 1b, 2a, 3   | 1<br>1, 3, 4                                 |                    |
| 3                            | 76.7, CH                   | 3.19, td (10.9, 5.3)                          | 2a, 2b, 4                        | 2, 4, 28                                     | 1a, 5, 28          |
| 4                            | 35.3, CH                   | 2.01                                          | 3, 5, 28                         | 3, 5, 28                                     | 19                 |
| 5                            | 46.0, CH                   | 1.65, br d (10.6)                             | 4, 6                             | 1, 3, 4, 19                                  | 3                  |
| 6                            | 72.8, CH                   | 4.03, d (2.5)                                 | 5                                | 5, 7, 8, 10                                  | 28                 |
| 7                            | 215.9, C                   |                                               |                                  |                                              |                    |
| 8                            | 52.8, C                    |                                               |                                  |                                              |                    |
| 9                            | 46.1, CH                   | 2.30, br s                                    | 11                               | 7, 8, 10, 11, 19, 30                         | 18, 19             |
| 10                           | 36.2, C                    |                                               |                                  |                                              |                    |
| 11                           | 68.1, CH                   | 4.49, br s                                    | 9, 12a, 12b                      | 8, 13                                        | 1b, 19             |
| 12                           | 35.8, CH <sub>2</sub>      | a: 2.32<br>b: 1.96                            | 11, 12b, 13<br>11, 12a, 13       | 11                                           |                    |
| 13                           | 44.4, CH                   | 3.09, br d (11.5)                             | 12a, 12b                         | 12, 14, 17, 18, 20                           | 16, 30             |
| 14                           | 46.8, C                    |                                               |                                  |                                              |                    |
| 15                           | 40.4, CH <sub>2</sub>      | a: 2.31<br>b: 1.91                            | 15b, 16<br>15a, 16               | 18<br>13, 14, 16, 17, 18                     |                    |
| 16                           | 73.9, CH                   | 5.91, br d (8.5)                              | 15a, 15b                         | 13, 14, 17, 20, 16- <u>COCH</u> <sub>3</sub> | 13                 |
| 17                           | 148.7, C                   |                                               |                                  |                                              |                    |
| 18                           | 18.0, CH <sub>3</sub>      | 0.96, s                                       |                                  | 8, 13, 14, 15                                | 9                  |
| 19                           | 25.1, CH <sub>3</sub>      | 1.28, s                                       |                                  | 1, 5, 9, 10                                  | 4, 9, 11           |
| 20                           | 130.0, C                   |                                               |                                  |                                              |                    |
| 21                           | 173.2, C                   |                                               |                                  |                                              |                    |
| 22                           | 28.7, CH <sub>2</sub>      | 2.46                                          | 23a, 23b                         | 17, 20, 21, 23, 24                           | 24                 |
| 23                           | 28.3, CH <sub>2</sub>      | a: 2.14<br>b: 2.07                            | 22, 23b, 24<br>22, 23a, 24       | 20, 22, 24, 25<br>20, 22, 24, 25             |                    |
| 24                           | 122.9, CH                  | 5.10, br t (7.2)                              | 23a, 23b, 26, 27                 | 23, 26, 27                                   | 22, 26             |
| 25                           | 132.8, C                   |                                               |                                  |                                              |                    |
| 26                           | 25.7, CH <sub>3</sub>      | 1.67, br s                                    | 24                               | 24, 25, 27                                   | 24                 |
| 27                           | 17.8, CH <sub>3</sub>      | 1.60, br s                                    | 24                               | 24, 25, 26                                   |                    |
| 28                           | 15.1, CH <sub>3</sub>      | 1.08, d (6.3)                                 | 4                                | 3, 4, 5                                      | 3, 6               |
| 30                           | 21.5, CH <sub>3</sub>      | 1.47, s                                       |                                  | 7, 8, 9, 14                                  | 13                 |
| 16- <u>COCH</u> <sub>3</sub> | 170.6, C                   |                                               |                                  |                                              |                    |
| 16- <u>COCH</u> <sub>3</sub> | 20.6, CH <sub>3</sub>      | 1.98, s                                       |                                  | 16- <u>COCH</u> <sub>3</sub>                 |                    |

<sup>a</sup>The indiscernible signals from overlap or the complex multiplicity are reported without designating multiplicity.<sup>b</sup>The data is recorded at 400 MHz.

**Table S13** NMR data for **18** ( $^1\text{H}$  for 600 MHz and  $^{13}\text{C}$  for 150 MHz in  $\text{CD}_3\text{OD}$ ).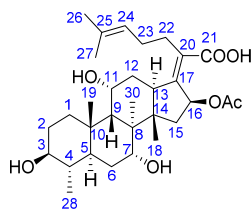**18**

| Position                     | $\delta_{\text{C}}$ , type | $\delta_{\text{H}}$ ( $J$ in Hz) <sup>a</sup> | $^1\text{H}$ - $^1\text{H}$ COSY | HMBC                                             | NOESY           |
|------------------------------|----------------------------|-----------------------------------------------|----------------------------------|--------------------------------------------------|-----------------|
| 1                            | 34.7, CH <sub>2</sub>      | a: 2.11<br>b: 1.71, dt (13.5, 3.6)            | 1b, 2a, 2b<br>1a, 2a, 2b         | 2, 3, 10, 19<br>3                                | 3, 11<br>11, 19 |
| 2                            | 32.3, CH <sub>2</sub>      | a: 1.77<br>b: 1.55                            | 1a, 1b, 2b, 3<br>1a, 1b, 2a, 3   | 1<br>10                                          |                 |
| 3                            | 76.9, CH                   | 3.00                                          | 2a, 2b, 4                        | 2, 4, 28                                         | 1a, 5, 28       |
| 4                            | 42.0, CH                   | 1.29                                          | 3, 5, 28                         | 3, 5                                             | 19              |
| 5                            | 43.8, CH                   | 1.85                                          | 4, 6a, 6b                        | 3, 4, 6, 10, 19                                  | 3, 28, 30       |
| 6                            | 35.1, CH <sub>2</sub>      | a: 1.67<br>b: 1.59                            | 5, 6b, 7<br>5, 6a, 7             | 7, 8                                             |                 |
| 7                            | 71.4, CH                   | 3.87, t (8.3)                                 | 6a, 6b                           | 6, 8, 9, 14, 30                                  | 9, 18           |
| 8                            | 46.2, C                    |                                               |                                  |                                                  |                 |
| 9                            | 51.4, CH                   | 1.51, d (1.4)                                 | 11                               | 7, 8, 10, 11, 14, 19, 30                         | 7, 18, 19       |
| 10                           | 37.1, C                    |                                               |                                  |                                                  |                 |
| 11                           | 68.5, CH                   | 4.31, br s                                    | 9, 12a, 12b                      | 8, 13                                            | 1a, 1b, 19      |
| 12                           | 37.3, CH <sub>2</sub>      | a: 2.29<br>b: 1.84                            | 11, 12b, 13<br>11, 12a, 13       | 11, 14<br>13                                     | 18              |
| 13                           | 45.3, CH                   | 3.02                                          | 12a, 12b                         | 11, 12, 14, 17, 18, 20                           | 16, 30          |
| 14                           | 49.2, C                    |                                               |                                  |                                                  |                 |
| 15                           | 43.0, CH <sub>2</sub>      | a: 2.25<br>b: 1.57                            | 15b, 16<br>15a, 16               | 8, 14, 18<br>13, 14, 16, 17, 18                  | 30              |
| 16                           | 76.0, CH                   | 5.75, br d (8.7)                              | 15a, 15b                         | 13, 14, 15, 17, 20, 16- <u>COCH</u> <sub>3</sub> | 13              |
| 17                           | 147.8, C                   |                                               |                                  |                                                  |                 |
| 18                           | 16.7, CH <sub>3</sub>      | 0.99, s                                       |                                  | 8, 13, 14, 15                                    | 7, 9, 12b       |
| 19                           | 25.7, CH <sub>3</sub>      | 0.99, s                                       |                                  | 1, 5, 9, 10                                      | 1b, 4, 9, 11    |
| 20                           | 132.0, C                   |                                               |                                  |                                                  |                 |
| 21                           | 174.6, C                   |                                               |                                  |                                                  |                 |
| 22                           | 29.8, CH <sub>2</sub>      | a: 2.55<br>b: 2.35                            | 22b, 23<br>22a, 23               | 17, 20, 21, 23, 24<br>17, 20, 21, 23, 24         | 24<br>24        |
| 23                           | 29.4, CH <sub>2</sub>      | 2.09                                          | 22a, 22b, 24                     | 20, 22, 24, 25                                   |                 |
| 24                           | 124.4, CH                  | 5.13, br t (7.3)                              | 23, 26, 27                       | 23, 26, 27                                       | 22a, 22b, 26    |
| 25                           | 133.3, C                   |                                               |                                  |                                                  |                 |
| 26                           | 25.9, CH <sub>3</sub>      | 1.66, br s                                    | 24                               | 24, 25, 27                                       | 24              |
| 27                           | 17.9, CH <sub>3</sub>      | 1.60, br s                                    | 24                               | 24, 25, 26                                       |                 |
| 28                           | 15.8, CH <sub>3</sub>      | 0.95, d (6.3)                                 | 4                                | 3, 4, 5                                          | 3, 5            |
| 30                           | 15.0, CH <sub>3</sub>      | 1.26, s                                       |                                  | 7, 8, 9, 14                                      | 5, 13, 15a      |
| 16- <u>COCH</u> <sub>3</sub> | 172.6, C                   |                                               |                                  |                                                  |                 |
| 16-COCH <sub>3</sub>         | 20.7, CH <sub>3</sub>      | 1.95, s                                       |                                  | 16- <u>COCH</u> <sub>3</sub>                     |                 |

<sup>a</sup>The indiscernible signals from overlap or the complex multiplicity are reported without designating multiplicity.

**Table S14** NMR data for **19** ( $^1\text{H}$  for 600 MHz and  $^{13}\text{C}$  for 150 MHz in  $\text{CD}_3\text{OD}$ ).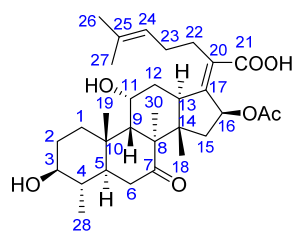**19**

| Position            | $\delta_{\text{C}}$ , type | $\delta_{\text{H}}$ ( $J$ in Hz) <sup>a</sup> | $^1\text{H}$ - $^1\text{H}$ COSY | HMBC                                     | NOESY            |
|---------------------|----------------------------|-----------------------------------------------|----------------------------------|------------------------------------------|------------------|
| 1                   | 35.5, $\text{CH}_2$        | 1.90                                          | 2a, 2b                           | 2, 3, 5, 10, 19                          |                  |
| 2                   | 32.7, $\text{CH}_2$        | a: 1.87<br>b: 1.67                            | 1, 2b, 3<br>1, 2a, 3             | 1, 3<br>3                                | 19               |
| 3                   | 77.2, CH                   | 3.03                                          | 2a, 2b, 4                        | 2, 4, 5, 28                              | 5, 28            |
| 4                   | 38.2, CH                   | 1.57                                          | 3, 5, 28                         | 3, 5, 28                                 | 19               |
| 5                   | 43.9, CH                   | 1.50                                          | 4, 6a, 6b                        | 1, 3, 4, 6, 7, 10, 19                    | 3, 28, 30        |
| 6                   | 41.1, $\text{CH}_2$        | a: 2.26<br>b: 2.18, t (14.6)                  | 5, 6b<br>5, 6a                   | 5, 7, 8, 10<br>5, 7, 10                  | 28<br>19         |
| 7                   | 221.5, C                   |                                               |                                  |                                          |                  |
| 8                   | 54.6, C                    |                                               |                                  |                                          |                  |
| 9                   | 48.0, CH                   | 1.86, br s                                    | 11                               | 1, 7, 8, 10, 11, 14, 19, 30              | 18, 19           |
| 10                  | 37.9, C                    |                                               |                                  |                                          |                  |
| 11                  | 67.5, CH                   | 4.37, br d (1.6)                              | 9, 12a, 12b                      | 8, 10, 13                                | 19               |
| 12                  | 36.9, $\text{CH}_2$        | a: 2.32<br>b: 1.84                            | 11, 12b, 13<br>11, 12a, 13       | 13                                       |                  |
| 13                  | 44.8, CH                   | 3.05                                          | 12a, 12b                         | 12, 14, 17, 18, 20                       | 16, 30           |
| 14                  | 48.4, C                    |                                               |                                  |                                          |                  |
| 15                  | 41.8, $\text{CH}_2$        | a: 2.29<br>b: 1.72, br d (14.7)               | 15b, 16<br>15a, 16               | 8, 14, 18<br>13, 14, 16, 17, 18          | 30<br>18         |
| 16                  | 75.5, CH                   | 5.79, br d (8.5)                              | 15a, 15b                         | 13, 14, 15, 17, 20, 16- $\text{COCH}_3$  | 13               |
| 17                  | 145.9, C                   |                                               |                                  |                                          |                  |
| 18                  | 17.5, $\text{CH}_3$        | 0.82, s                                       |                                  | 8, 13, 14, 15                            | 9, 15b           |
| 19                  | 21.6, $\text{CH}_3$        | 1.11, s                                       |                                  | 1, 5, 9, 10                              | 2b, 4, 6b, 9, 11 |
| 20                  | 133.6, C                   |                                               |                                  |                                          |                  |
| 21                  | 174.8, C                   |                                               |                                  |                                          |                  |
| 22                  | 29.9, $\text{CH}_2$        | a: 2.54<br>b: 2.35                            | 22b, 23<br>22a, 23               | 17, 20, 21, 23, 24<br>17, 20, 21, 23, 24 | 24<br>24         |
| 23                  | 29.2, $\text{CH}_2$        | 2.10                                          | 22a, 22b, 24                     | 22, 24, 25                               |                  |
| 24                  | 124.4, CH                  | 5.13, br t (7.3)                              | 23, 26, 27                       | 23, 26, 27                               | 22a, 22b, 26     |
| 25                  | 133.3, C                   |                                               |                                  |                                          |                  |
| 26                  | 25.9, $\text{CH}_3$        | 1.66, br s                                    | 24                               | 24, 25, 27                               | 24               |
| 27                  | 17.9, $\text{CH}_3$        | 1.60, br s                                    | 24                               | 24, 25, 26                               |                  |
| 28                  | 15.7, $\text{CH}_3$        | 0.93, d (6.2)                                 | 4                                | 3, 4, 5                                  | 3, 5, 6a         |
| 30                  | 22.5, $\text{CH}_3$        | 1.41, s                                       |                                  | 7, 8, 9, 14                              | 5, 13, 15a       |
| 16- $\text{COCH}_3$ | 172.6, C                   |                                               |                                  |                                          |                  |
| 16- $\text{COCH}_3$ | 20.7, $\text{CH}_3$        | 1.95, s                                       |                                  | 16- $\text{COCH}_3$                      |                  |

<sup>a</sup>The indiscernible signals from overlap or the complex multiplicity are reported without designating multiplicity.



**Table S15** NMR data for **20** ( $^1\text{H}$  for 600 MHz and  $^{13}\text{C}$  for 150 MHz in  $\text{CD}_3\text{OD}$ ).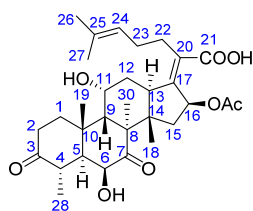**20**

| Position            | $\delta_{\text{C}}$ , type | $\delta_{\text{H}}$ ( $J$ in Hz) <sup>a</sup> | $^1\text{H}$ - $^1\text{H}$ COSY       | HMBC                                     | NOESY        |
|---------------------|----------------------------|-----------------------------------------------|----------------------------------------|------------------------------------------|--------------|
| 1                   | 37.3, $\text{CH}_2$        | a: 2.40<br>b: 1.98                            | 1b, 2<br>1a, 2                         | 2, 3, 10, 19<br>2, 5, 10                 |              |
| 2                   | 38.6, $\text{CH}_2$        | 2.50                                          | 1a, 1b                                 | 1, 3, 10                                 |              |
| 3                   | 216.9, C                   |                                               |                                        |                                          |              |
| 4                   | 42.9, CH                   | 2.87, dq (13.3, 6.7)                          | 5, 28                                  | 3, 5, 6, 10, 28                          | 19           |
| 5                   | 47.5, CH                   | 1.88, dd (12.5, 1.8)                          | 4, 6                                   | 1, 3, 4, 7, 10, 19, 28                   |              |
| 6                   | 74.5, CH                   | 3.82, br s                                    | 5                                      | 4, 5, 7, 8, 10                           | 30           |
| 7                   | 216.9, C                   |                                               |                                        |                                          |              |
| 8                   | 54.5, C                    |                                               |                                        |                                          |              |
| 9                   | 45.7, CH                   | 2.53, br s                                    | 11                                     | 1, 5, 7, 8, 10, 11, 14, 19, 30           | 19           |
| 10                  | 37.3, C                    |                                               |                                        |                                          |              |
| 11                  | 67.7, CH                   | 4.47, br s                                    | 9, 12a, 12b                            | 8, 13                                    | 19           |
| 12                  | 36.9, $\text{CH}_2$        | a: 2.35<br>b: 1.92                            | 11, 12b, 13<br>11, 12a, 13             | 11, 14<br>13                             |              |
| 13                  | 44.9, CH                   | 3.12, br d (12.0)                             | 12a, 12b                               | 12, 14, 17, 18, 20                       | 30           |
| 14                  | 48.0, C                    |                                               |                                        |                                          |              |
| 15                  | 41.9, $\text{CH}_2$        | a: 2.34<br>b: 1.81, br d (14.6)               | 15b, 16<br>15a, 16                     | 8, 14, 18<br>13, 14, 16, 17, 18          |              |
| 16                  | 75.5, CH                   | 5.81, br d (8.5)                              | 15a, 15b                               | 13, 14, 15, 17, 20, 16- $\text{COCH}_3$  |              |
| 17                  | 147.1, C                   |                                               |                                        |                                          |              |
| 18                  | 18.7, $\text{CH}_3$        | 0.92, s                                       |                                        | 8, 13, 14, 15                            |              |
| 19                  | 24.8, $\text{CH}_3$        | 1.45, s                                       |                                        | 1, 5, 9, 10                              | 4, 9, 11     |
| 20                  | 132.7, C                   |                                               |                                        |                                          |              |
| 21                  | 174.2, C                   |                                               |                                        |                                          |              |
| 22                  | 29.8, $\text{CH}_2$        | a: 2.55<br>b: 2.37                            | 22b, 23a, 23b<br>22a, 23a, 23b         | 17, 20, 21, 23, 24<br>17, 20, 21, 23, 24 | 24<br>24     |
| 23                  | 29.2, $\text{CH}_2$        | a: 2.14<br>b: 2.08                            | 22a, 22b, 23b, 24<br>22a, 22b, 23a, 24 | 22, 24, 25<br>22, 24, 25                 | 27<br>27     |
| 24                  | 124.2, CH                  | 5.13, br t (7.2)                              | 23a, 23b, 26, 27                       | 23, 26, 27                               | 22a, 22b, 26 |
| 25                  | 133.4, C                   |                                               |                                        |                                          |              |
| 26                  | 25.9, $\text{CH}_3$        | 1.66, br s                                    | 24                                     | 24, 25, 27                               | 24           |
| 27                  | 17.9, $\text{CH}_3$        | 1.60, br s                                    | 24                                     | 24, 25, 26                               | 23a, 23b     |
| 28                  | 12.8, $\text{CH}_3$        | 1.06, d (6.8)                                 | 4                                      | 3, 4, 5                                  |              |
| 30                  | 22.4, $\text{CH}_3$        | 1.44, s                                       |                                        | 7, 8, 9, 14                              | 6, 13        |
| 16- $\text{COCH}_3$ | 172.6, C                   |                                               |                                        |                                          |              |
| 16- $\text{COCH}_3$ | 20.7, $\text{CH}_3$        | 1.96, s                                       |                                        | 16- $\text{COCH}_3$                      |              |

<sup>a</sup>The indiscernible signals from overlap or the complex multiplicity are reported without designating multiplicity.

**Table S16** NMR data for **21** ( $^1\text{H}$  for 600 MHz and  $^{13}\text{C}$  for 150 MHz in  $\text{CDCl}_3$ ).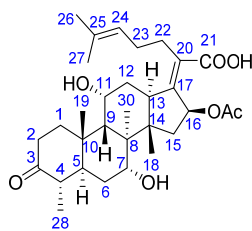**21**

| Position                     | $\delta_{\text{C}}$ , type | $\delta_{\text{H}}$ ( $J$ in Hz) <sup>a</sup> | $^1\text{H}$ - $^1\text{H}$ COSY | HMBC                                         | NOESY          |
|------------------------------|----------------------------|-----------------------------------------------|----------------------------------|----------------------------------------------|----------------|
| 1                            | 35.5, CH <sub>2</sub>      | a: 2.42<br>b: 1.97                            | 1b, 2a, 2b<br>1a, 2a, 2b         | 2, 10, 19<br>2, 3, 5, 10, 19                 | 11<br>11       |
| 2                            | 38.2, CH <sub>2</sub>      | a: 2.48<br>b: 2.37, br d (12.4)               | 1a, 1b, 2b<br>1a, 1b, 2a         | 1, 3<br>3, 10                                |                |
| 3                            | 212.8, C                   |                                               |                                  |                                              |                |
| 4                            | 46.5, CH                   | 2.26                                          | 5, 28                            | 2, 3, 5, 10, 28                              | 19             |
| 5                            | 44.5, CH                   | 2.25                                          | 4, 6a, 6b                        | 3, 4, 10, 19, 28                             | 28, 30         |
| 6                            | 35.0, CH <sub>2</sub>      | a: 1.82<br>b: 1.53                            | 5, 6b, 7<br>5, 6a, 7             | 4, 5, 7<br>5, 7, 10                          |                |
| 7                            | 70.4, CH                   | 3.96, t (7.9)                                 | 6a, 6b                           | 5, 6, 8, 9, 14, 30                           | 9, 18, 19      |
| 8                            | 44.7, C                    |                                               |                                  |                                              |                |
| 9                            | 49.8, CH                   | 1.59                                          | 11                               | 7, 8, 10, 11, 12, 14, 19, 30                 | 7, 12b, 18, 19 |
| 10                           | 36.1, C                    |                                               |                                  |                                              |                |
| 11                           | 68.1, CH                   | 4.37, br s                                    | 9, 12a, 12b                      | 8, 9, 10, 12, 13                             | 1a, 1b, 19     |
| 12                           | 36.0, CH <sub>2</sub>      | a: 2.30<br>b: 1.92                            | 11, 12b, 13<br>11, 12a, 13       | 9, 11, 14<br>13                              | 9, 18          |
| 13                           | 44.3, CH                   | 3.02, br d (12.1)                             | 12a, 12b                         | 11, 12, 14, 17, 18, 20                       | 16, 30         |
| 14                           | 47.9, C                    |                                               |                                  |                                              |                |
| 15                           | 41.7, CH <sub>2</sub>      | a: 2.27<br>b: 1.56                            | 15b, 16<br>15a, 16               | 14, 18<br>8, 14, 16, 17, 18                  |                |
| 16                           | 74.3, CH                   | 5.85, br d (8.4)                              | 15a, 15b                         | 13, 14, 17, 20, 16- <u>COCH</u> <sub>3</sub> | 13, 30         |
| 17                           | 148.7, C                   |                                               |                                  |                                              |                |
| 18                           | 16.7, CH <sub>3</sub>      | 1.00, s                                       |                                  | 8, 13, 14, 15                                | 7, 9, 12b      |
| 19                           | 24.4, CH <sub>3</sub>      | 1.19, s                                       |                                  | 1, 5, 9, 10                                  | 4, 7, 9, 11    |
| 20                           | 130.0, C                   |                                               |                                  |                                              |                |
| 21                           | 174.4, C                   |                                               |                                  |                                              |                |
| 22                           | 28.7, CH <sub>2</sub>      | 2.43                                          | 23a, 23b                         | 17, 20, 21, 23, 24                           | 24             |
| 23                           | 28.4, CH <sub>2</sub>      | a: 2.13<br>b: 2.04                            | 22, 23b, 24<br>22, 23a, 24       | 20, 22, 24, 25<br>20, 22, 24, 25             |                |
| 24                           | 123.0, CH                  | 5.08, br t (6.8)                              | 23a, 23b, 26, 27                 | 23, 26, 27                                   | 22, 26         |
| 25                           | 132.6, C                   |                                               |                                  |                                              |                |
| 26                           | 25.7, CH <sub>3</sub>      | 1.66, br s                                    | 24                               | 24, 25, 27                                   | 24             |
| 27                           | 17.8, CH <sub>3</sub>      | 1.58, br s                                    | 24                               | 24, 25, 26                                   |                |
| 28                           | 11.5, CH <sub>3</sub>      | 0.98, d (5.0)                                 | 4                                | 3, 4, 5                                      | 5              |
| 30                           | 14.4, CH <sub>3</sub>      | 1.23, s                                       |                                  | 7, 8, 9, 14                                  | 5, 13, 16      |
| 16- <u>COCH</u> <sub>3</sub> | 171.0, C                   |                                               |                                  |                                              |                |
| 16- <u>COCH</u> <sub>3</sub> | 20.6, CH <sub>3</sub>      | 1.94, s                                       |                                  | 16- <u>COCH</u> <sub>3</sub>                 |                |

<sup>a</sup>The indiscernible signals from overlap or the complex multiplicity are reported without designating multiplicity.

**Table S17** NMR data for **22** ( $^1\text{H}$  for 600 MHz and  $^{13}\text{C}$  for 150 MHz in  $\text{CDCl}_3$ ).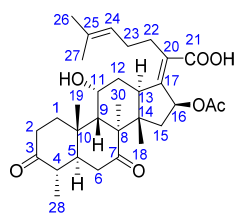**22**

| Position                      | $\delta_{\text{C}}$ , type          | $\delta_{\text{H}}$ ( $J$ in Hz) <sup>a</sup> | $^1\text{H}$ - $^1\text{H}$ COSY <sup>b</sup> | HMBC <sup>b</sup>                    | ROESY <sup>b</sup> |
|-------------------------------|-------------------------------------|-----------------------------------------------|-----------------------------------------------|--------------------------------------|--------------------|
| 1                             | 34.7, CH <sub>2</sub>               | a: 2.36<br>b: 2.05                            | 1b, 2<br>1a, 2                                | 9, 10, 19<br>3, 19                   |                    |
| 2                             | 37.7, CH <sub>2</sub>               | 2.52                                          | 1a, 1b                                        | 1, 3                                 | 19                 |
| 3                             | 212.2, C                            |                                               |                                               |                                      |                    |
| 4                             | 44.2, CH                            | 2.40                                          | 5, 28                                         | 3, 5, 10                             | 19                 |
| 5                             | 43.0, CH                            | 1.99                                          | 4, 6a, 6b                                     | 4                                    | 30                 |
| 6                             | 40.4 <sup>c</sup> , CH <sub>2</sub> | a: 2.32<br>b: 2.19, t (14.7)                  | 5, 6b<br>5, 6a                                | 7, 10<br>5, 7, 10                    |                    |
| 7                             | 216.7, C                            |                                               |                                               |                                      |                    |
| 8                             | 53.2, C                             |                                               |                                               |                                      |                    |
| 9                             | 46.5, CH                            | 1.94, d (1.3)                                 | 11                                            | 1, 7, 8, 10, 11, 19, 30              | 18, 19             |
| 10                            | 36.6, C                             |                                               |                                               |                                      |                    |
| 11                            | 67.4, CH                            | 4.51, br s                                    | 9, 12a, 12b                                   | 8, 13                                | 19                 |
| 12                            | 35.7, CH <sub>2</sub>               | a: 2.34<br>b: 1.91                            | 11, 12b, 13<br>11, 12a, 13                    | 11, 14                               |                    |
| 13                            | 43.9, CH                            | 3.06, br d (11.8)                             | 12a, 12b                                      | 12, 14, 17, 18, 20                   | 16, 30             |
| 14                            | 47.2, C                             |                                               |                                               |                                      |                    |
| 15                            | 40.5 <sup>c</sup> , CH <sub>2</sub> | a: 2.32<br>b: 1.89, br d (14.7)               | 15b, 16<br>15a, 16                            | 18<br>13, 14, 16, 17                 |                    |
| 16                            | 73.8, CH                            | 5.93, br d (8.3)                              | 15a, 15b                                      | 14, 17, 16- <u>COCH</u> <sub>3</sub> | 13                 |
| 17                            | 148.0, C                            |                                               |                                               |                                      |                    |
| 18                            | 17.1, CH <sub>3</sub>               | 0.85, s                                       |                                               | 8, 13, 14, 15                        | 9                  |
| 19                            | 21.3 <sup>d</sup> , CH <sub>3</sub> | 1.23, s                                       |                                               | 1, 5, 9, 10                          | 2, 4, 9, 11        |
| 20                            | 130.7, C                            |                                               |                                               |                                      |                    |
| 21                            | 174.1, C                            |                                               |                                               |                                      |                    |
| 22                            | 28.7, CH <sub>2</sub>               | 2.42                                          | 23                                            | 17, 20, 21, 23, 24                   | 24                 |
| 23                            | 28.3, CH <sub>2</sub>               | 2.09                                          | 22, 24                                        | 22, 24, 25                           |                    |
| 24                            | 122.9, CH                           | 5.09, br t (7.1)                              | 23, 26, 27                                    | 26, 27                               | 22, 26             |
| 25                            | 132.7, C                            |                                               |                                               |                                      |                    |
| 26                            | 25.7, CH <sub>3</sub>               | 1.67, br s                                    | 24                                            | 24, 25, 27                           | 24                 |
| 27                            | 17.8, CH <sub>3</sub>               | 1.59, br s                                    | 24                                            | 24, 25, 26                           |                    |
| 28                            | 12.6, CH <sub>3</sub>               | 1.03, d (6.7)                                 | 4                                             | 3, 4, 5                              |                    |
| 30                            | 21.4 <sup>d</sup> , CH <sub>3</sub> | 1.41, s                                       |                                               | 7, 8, 9, 14                          | 5, 13              |
| 16- <u>COCH</u> <sub>3</sub>  | 170.7, C                            |                                               |                                               |                                      |                    |
| 16-CO <u>C</u> H <sub>3</sub> | 20.6, CH <sub>3</sub>               | 1.95, s                                       |                                               | 16- <u>COCH</u> <sub>3</sub>         |                    |

<sup>a</sup>The indiscernible signals from overlap or the complex multiplicity are reported without designating multiplicity.<sup>b</sup>The data were recorded at 400 MHz.<sup>c,d</sup>Assignment might be interchanged.

**Table S18** NMR data for **23** ( $^1\text{H}$  for 400 MHz and  $^{13}\text{C}$  for 100 MHz in  $\text{CDCl}_3$ ).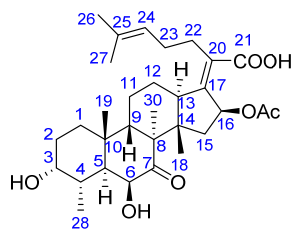**23**

| Position                     | $\delta_{\text{C}}$ , type | $\delta_{\text{H}}$ ( $J$ in Hz) <sup>a</sup> | $^1\text{H}$ - $^1\text{H}$ COSY       | HMBC                                     | ROESY            |
|------------------------------|----------------------------|-----------------------------------------------|----------------------------------------|------------------------------------------|------------------|
| 1                            | 30.0, CH <sub>2</sub>      | a: 1.71<br>b: 1.23                            | 1b, 2a, 2b<br>1a, 2a, 2b               | 19                                       |                  |
| 2                            | 29.8, CH <sub>2</sub>      | a: 1.90<br>b: 1.70                            | 1a, 1b, 2b, 3<br>1a, 1b, 2a, 3         | 3, 4, 10                                 |                  |
| 3                            | 71.4, CH                   | 3.89, br s                                    | 2a, 2b, 4                              | 1, 2, 5, 28                              |                  |
| 4                            | 32.1, CH                   | 2.23                                          | 3, 5, 28                               | 5, 28                                    | 19               |
| 5                            | 39.0, CH                   | 2.12                                          | 4, 6,                                  | 1, 3, 4, 7, 10, 19                       | 28, 30           |
| 6                            | 73.8, CH                   | 3.87, br s                                    | 5                                      | 4, 5, 7, 8, 10                           | 28               |
| 7                            | 217.7, C                   |                                               |                                        |                                          |                  |
| 8                            | 52.5, C                    |                                               |                                        |                                          |                  |
| 9                            | 41.7, CH                   | 2.45                                          | 11a, 11b                               | 1, 8, 10, 14, 19, 30                     | 18, 19           |
| 10                           | 35.6, C                    |                                               |                                        |                                          |                  |
| 11                           | 22.7, CH <sub>2</sub>      | a: 1.76<br>b: 1.38                            | 9, 11b, 12a, 12b<br>9, 11a, 12a, 12b   | 8                                        | 13               |
| 12                           | 26.1, CH <sub>2</sub>      | a: 2.27<br>b: 1.71                            | 11a, 11b, 12b, 13<br>11a, 11b, 12a, 13 | 9, 14                                    |                  |
| 13                           | 49.3, CH                   | 2.51                                          | 12a, 12b                               | 12, 14, 17, 18, 20                       | 11b, 15a, 16, 30 |
| 14                           | 46.7, C                    |                                               |                                        |                                          |                  |
| 15                           | 40.7, CH <sub>2</sub>      | a: 2.25<br>b: 1.80                            | 15b, 16<br>15a, 16                     | 8, 14, 18<br>13, 14, 16, 17, 18          | 13<br>18         |
| 16                           | 74.0, CH                   | 5.80, br d (8.2)                              | 15a, 15b                               | 14, 17, 20, 16- <u>COCH</u> <sub>3</sub> | 13               |
| 17                           | 148.8, C                   |                                               |                                        |                                          |                  |
| 18                           | 18.2, CH <sub>3</sub>      | 0.89, s                                       |                                        | 8, 13, 14, 15                            | 9, 15b           |
| 19                           | 23.0, CH <sub>3</sub>      | 1.25, s                                       |                                        | 1, 5, 9, 10                              | 4, 9             |
| 20                           | 130.1, C                   |                                               |                                        |                                          |                  |
| 21                           | 174.1, C                   |                                               |                                        |                                          |                  |
| 22                           | 28.4, CH <sub>2</sub>      | 2.43                                          | 23                                     | 17, 20, 21, 23, 24                       | 24               |
| 23                           | 28.4, CH <sub>2</sub>      | 2.06                                          | 22, 24                                 | 20, 22, 24, 25                           |                  |
| 24                           | 123.0, CH                  | 5.07, br t (6.7)                              | 23, 26, 27                             | 23, 26, 27                               | 22, 26           |
| 25                           | 132.5, C                   |                                               |                                        |                                          |                  |
| 26                           | 25.6, CH <sub>3</sub>      | 1.65, br s                                    | 24                                     | 24, 25, 27                               | 24               |
| 27                           | 17.7, CH <sub>3</sub>      | 1.57, br s                                    | 24                                     | 24, 25, 26                               |                  |
| 28                           | 15.0, CH <sub>3</sub>      | 0.97, d (6.2)                                 | 4                                      | 3, 4, 5                                  | 5, 6             |
| 30                           | 17.4, CH <sub>3</sub>      | 1.25, s                                       |                                        | 7, 8, 9, 14                              | 5, 13            |
| 16- <u>COCH</u> <sub>3</sub> | 170.9, C                   |                                               |                                        |                                          |                  |
| 16-CO <u>CH</u> <sub>3</sub> | 20.4, CH <sub>3</sub>      | 1.93, s                                       |                                        | 16- <u>COCH</u> <sub>3</sub>             |                  |

<sup>a</sup>The indiscernible signals from overlap or the complex multiplicity are reported without designating multiplicity.

**Table S19** NMR data for **24** ( $^1\text{H}$  for 600 MHz and  $^{13}\text{C}$  for 150 MHz in  $\text{CDCl}_3$ ).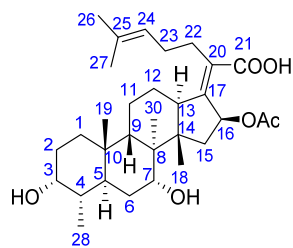**24**

| Position                     | $\delta_{\text{C}}$ , type | $\delta_{\text{H}}$ ( $J$ in Hz) <sup>a</sup> | $^1\text{H}$ - $^1\text{H}$ COSY       | HMBC                                     | ROESY        |
|------------------------------|----------------------------|-----------------------------------------------|----------------------------------------|------------------------------------------|--------------|
| 1                            | 29.6, CH <sub>2</sub>      | a: 1.60<br>b: 1.27, br d (12.1)               | 1b, 2a, 2b<br>1a, 2a, 2b               | 2, 9, 10, 19<br>2, 3, 5                  |              |
| 2                            | 29.7, CH <sub>2</sub>      | a: 1.77<br>b: 1.69                            | 1a, 1b, 2b, 3<br>1a, 1b, 2a, 3         | 1<br>1                                   |              |
| 3                            | 71.3, CH                   | 3.73, br s                                    | 2a, 2b, 4                              | 1, 2, 5, 28                              | 28           |
| 4                            | 35.8, CH                   | 1.55                                          | 3, 5, 28                               | 5, 6, 28                                 | 19           |
| 5                            | 34.7, CH                   | 2.15                                          | 4, 6a, 6b                              | 1, 3, 4, 6, 10, 19, 28                   | 28, 30       |
| 6                            | 33.4, CH <sub>2</sub>      | a: 1.66<br>b: 1.37                            | 5, 6b, 7<br>5, 6a, 7                   | 4, 5, 7, 8, 10<br>4, 5, 7, 8, 10         |              |
| 7                            | 70.4, CH                   | 4.00, dd (8.1, 4.7)                           | 6a, 6b                                 | 5, 6, 8, 14, 30                          | 9, 18, 19    |
| 8                            | 44.5, C                    |                                               |                                        |                                          |              |
| 9                            | 45.9, CH                   | 1.48                                          | 11a, 11b                               | 8, 10, 12, 19, 30                        | 7, 18, 19    |
| 10                           | 35.7, C                    |                                               |                                        |                                          |              |
| 11                           | 23.4, CH <sub>2</sub>      | a: 1.71<br>b: 1.35                            | 9, 11b, 12a, 12b<br>9, 11a, 12a, 12b   | 8, 9, 10                                 |              |
| 12                           | 26.3, CH <sub>2</sub>      | a: 2.23<br>b: 1.60                            | 11a, 11b, 12b, 13<br>11a, 11b, 12a, 13 | 11, 14<br>9, 11, 13                      |              |
| 13                           | 49.3, CH                   | 2.48                                          | 12a, 12b                               | 12, 14, 17, 18, 20                       | 16, 30       |
| 14                           | 48.2, C                    |                                               |                                        |                                          |              |
| 15                           | 41.6, CH <sub>2</sub>      | a: 2.24<br>b: 1.49                            | 15b, 16<br>15a, 16                     | 8, 14, 18<br>13, 14, 16, 17, 18          | 30<br>18     |
| 16                           | 74.4, CH                   | 5.83, br d (8.6)                              | 15a, 15b                               | 14, 17, 20, 16- <u>COCH</u> <sub>3</sub> | 13           |
| 17                           | 149.4, C                   |                                               |                                        |                                          |              |
| 18                           | 17.9, CH <sub>3</sub>      | 0.99, s                                       |                                        | 8, 13, 14, 15                            | 7, 9, 15b    |
| 19                           | 22.2, CH <sub>3</sub>      | 0.87, s                                       |                                        | 1, 5, 9, 10                              | 4, 7, 9      |
| 20                           | 129.6, C                   |                                               |                                        |                                          |              |
| 21                           | 174.1, C                   |                                               |                                        |                                          |              |
| 22                           | 28.6, CH <sub>2</sub>      | a: 2.50<br>b: 2.40                            | 22b, 23a, 23b<br>22a, 23a, 23b         | 17, 20, 21, 23, 24<br>17, 20, 21, 23, 24 | 24<br>24     |
| 23                           | 28.3, CH <sub>2</sub>      | a: 2.11<br>b: 2.05                            | 22a, 22b, 23b, 24<br>22a, 22b, 23a, 24 | 20, 22, 24, 25<br>20, 22, 24, 25         |              |
| 24                           | 123.0, CH                  | 5.09, br t (7.1)                              | 23a, 23b, 26, 27                       | 23, 26, 27                               | 22a, 22b, 26 |
| 25                           | 132.6, C                   |                                               |                                        |                                          |              |
| 26                           | 25.7, CH <sub>3</sub>      | 1.67, br s                                    | 24                                     | 24, 25, 27                               | 24           |
| 27                           | 17.7, CH <sub>3</sub>      | 1.59, br s                                    | 24                                     | 24, 25, 26                               |              |
| 28                           | 15.8, CH <sub>3</sub>      | 0.90, d (6.8)                                 | 4                                      | 3, 4, 5                                  | 3, 5         |
| 30                           | 12.3, CH <sub>3</sub>      | 1.08, s                                       |                                        | 7, 8, 9, 14                              | 5, 13, 15a   |
| 16- <u>COCH</u> <sub>3</sub> | 170.6, C                   |                                               |                                        |                                          |              |
| 16- <u>COCH</u> <sub>3</sub> | 20.6, CH <sub>3</sub>      | 1.95, s                                       |                                        | 16- <u>COCH</u> <sub>3</sub>             |              |

<sup>a</sup>The indiscernible signals from overlap or the complex multiplicity are reported without designating multiplicity.

**Table S20** NMR data for **25** ( $^1\text{H}$  for 600 MHz and  $^{13}\text{C}$  for 150 MHz in  $\text{CDCl}_3$ ).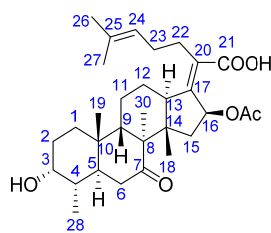**25**

| Position                     | $\delta_{\text{C}}$ , type | $\delta_{\text{H}}$ ( $J$ in Hz) <sup>a</sup> | $^1\text{H}$ - $^1\text{H}$ COSY       | HMBC                                             | NOESY        |
|------------------------------|----------------------------|-----------------------------------------------|----------------------------------------|--------------------------------------------------|--------------|
| 1                            | 28.2, CH <sub>2</sub>      | a: 1.72<br>b: 1.33                            | 1b, 2a, 2b<br>1a, 2a, 2b               | 2, 10, 19<br>2, 3, 5, 10                         |              |
| 2                            | 29.7, CH <sub>2</sub>      | a: 1.89<br>b: 1.75                            | 1a, 1b, 2b, 3<br>1a, 1b, 2a, 3         | 3, 4, 10                                         |              |
| 3                            | 71.1, CH                   | 3.82, br s                                    | 2a, 2b, 4                              | 1, 5, 28                                         | 28           |
| 4                            | 34.0, CH                   | 1.81                                          | 3, 5, 28                               | 5, 28                                            | 19           |
| 5                            | 35.5, CH                   | 2.21                                          | 4, 6a, 6b                              | 1, 3, 4, 6, 7, 10, 19                            | 28, 30       |
| 6                            | 39.5, CH <sub>2</sub>      | a: 2.20<br>b: 2.07                            | 5, 6b<br>5, 6a                         | 4, 7, 8, 10<br>5, 7, 10                          | 19           |
| 7                            | 218.2, C                   |                                               |                                        |                                                  |              |
| 8                            | 52.5, C                    |                                               |                                        |                                                  |              |
| 9                            | 43.3, CH                   | 1.91                                          | 11a, 11b                               | 1, 8, 10, 11, 19, 30                             | 18, 19       |
| 10                           | 36.1, C                    |                                               |                                        |                                                  |              |
| 11                           | 22.7, CH <sub>2</sub>      | a: 1.74<br>b: 1.34                            | 9, 11b, 12a, 12b<br>9, 11a, 12a, 12b   | 9                                                |              |
| 12                           | 26.1, CH <sub>2</sub>      | a: 2.28<br>b: 1.65                            | 11a, 11b, 12b, 13<br>11a, 11b, 12a, 13 | 11, 13                                           | 18           |
| 13                           | 49.2, CH                   | 2.51                                          | 12a, 12b                               | 12, 14, 17, 18, 20                               | 16, 30       |
| 14                           | 47.1, C                    |                                               |                                        |                                                  |              |
| 15                           | 40.6, CH <sub>2</sub>      | a: 2.28<br>b: 1.87                            | 15b, 16<br>15a, 16                     | 8, 14, 18<br>13, 14, 16, 17, 18                  | 18           |
| 16                           | 73.8, CH                   | 5.85, br d (8.5)                              | 15a, 15b                               | 13, 14, 15, 17, 20, 16- <u>COCH</u> <sub>3</sub> | 13           |
| 17                           | 148.5, C                   |                                               |                                        |                                                  |              |
| 18                           | 17.4, CH <sub>3</sub>      | 0.85, s                                       |                                        | 8, 13, 14, 15                                    | 9, 12b, 15b  |
| 19                           | 19.6, CH <sub>3</sub>      | 1.00, s                                       |                                        | 1, 5, 9, 10                                      | 4, 6b, 9     |
| 20                           | 129.9, C                   |                                               |                                        |                                                  |              |
| 21                           | 174.0, C                   |                                               |                                        |                                                  |              |
| 22                           | 28.5, CH <sub>2</sub>      | a: 2.50<br>b: 2.41                            | 22b, 23a, 23b<br>22a, 23a, 23b         | 17, 20, 21, 23, 24<br>17, 20, 21, 23, 24         | 24<br>24     |
| 23                           | 28.3, CH <sub>2</sub>      | a: 2.10<br>b: 2.04                            | 22a, 22b, 23b, 24<br>22a, 22b, 23a, 24 | 20, 22, 24, 25<br>20, 22, 24, 25                 | 27<br>27     |
| 24                           | 122.9, CH                  | 5.08, br t (6.7)                              | 23a, 23b, 26, 27                       | 23, 26, 27                                       | 22a, 22b, 26 |
| 25                           | 132.7, C                   |                                               |                                        |                                                  |              |
| 26                           | 25.7, CH <sub>3</sub>      | 1.67, br s                                    | 24                                     | 24, 25, 27                                       | 24           |
| 27                           | 17.7, CH <sub>3</sub>      | 1.59, br s                                    | 24                                     | 24, 25, 26                                       | 23a, 23b     |
| 28                           | 15.6, CH <sub>3</sub>      | 0.90, d (6.8)                                 | 4                                      | 3, 4, 5                                          | 3, 5         |
| 30                           | 17.4, CH <sub>3</sub>      | 1.27, s                                       |                                        | 7, 8, 9, 14                                      | 5, 13        |
| 16- <u>COCH</u> <sub>3</sub> | 170.3, C                   |                                               |                                        |                                                  |              |
| 16-CO <u>CH</u> <sub>3</sub> | 20.5, CH <sub>3</sub>      | 1.94, s                                       |                                        | 16- <u>COCH</u> <sub>3</sub>                     |              |

<sup>a</sup>The indiscernible signals from overlap or the complex multiplicity are reported without designating multiplicity.

**Table S21** NMR data for **26** ( $^1\text{H}$  for 400 MHz and  $^{13}\text{C}$  for 100 MHz in  $\text{CDCl}_3$ ).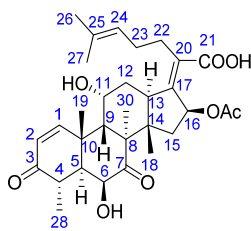**26**

| Position             | $\delta_{\text{C}}$ , type | $\delta_{\text{H}}$ ( $J$ in Hz) <sup>a</sup> | $^1\text{H}-^1\text{H}$ COSY | HMBC                             | ROESY    |
|----------------------|----------------------------|-----------------------------------------------|------------------------------|----------------------------------|----------|
| 1                    | 160.8, CH                  | 8.06, d (10.2)                                | 2                            | 3, 5, 10                         | 11       |
| 2                    | 126.2, CH                  | 5.83, d (10.2)                                | 1                            | 4, 10                            |          |
| 3                    | 202.3, C                   |                                               |                              |                                  |          |
| 4                    | 39.9, CH                   | 3.02, dq (13.1, 6.5)                          | 5, 28                        | 3, 5, 28                         | 19       |
| 5                    | 46.5, CH                   | 2.38                                          | 4, 6                         | 1, 3, 4, 10, 19                  | 30       |
| 6                    | 73.3, CH                   | 4.0, br s                                     | 5                            | 5, 7, 8, 10                      | 28       |
| 7                    | 215.3, C                   |                                               |                              |                                  |          |
| 8                    | 53.0, C                    |                                               |                              |                                  |          |
| 9                    | 45.4, CH                   | 2.55, br s                                    | 11                           | 1, 7, 8, 10, 11, 14, 19, 30      | 18, 19   |
| 10                   | 38.7, C                    |                                               |                              |                                  |          |
| 11                   | 67.6, CH                   | 4.68, br s                                    | 9, 12a, 12b                  | 8, 13                            | 1, 19    |
| 12                   | 35.8, CH <sub>2</sub>      | a: 2.37<br>b: 2.08                            | 11, 12b, 13<br>11, 12a, 13   | 11, 14                           |          |
| 13                   | 44.2, CH                   | 3.11, br d (11.9)                             | 12a, 12b                     | 12, 14, 17, 18, 20               | 16, 30   |
| 14                   | 46.7, C                    |                                               |                              |                                  |          |
| 15                   | 40.7, CH <sub>2</sub>      | a: 2.32<br>b: 1.91, br d (14.7)               | 15b, 16<br>15a, 16           | 18<br>13, 16, 17, 18             |          |
| 16                   | 74.0, CH                   | 5.92, br d (8.2)                              | 15a, 15b                     | 14, 17, 20, 16-COCH <sub>3</sub> | 13       |
| 17                   | 149.1, C                   |                                               |                              |                                  |          |
| 18                   | 18.1, CH <sub>3</sub>      | 0.94, s                                       |                              | 8, 13, 14, 15                    | 9        |
| 19                   | 28.4, CH <sub>3</sub>      | 1.55, s                                       |                              | 1, 5, 9, 10                      | 4, 9, 11 |
| 20                   | 130.2, C                   |                                               |                              |                                  |          |
| 21                   | 173.9, C                   |                                               |                              |                                  |          |
| 22                   | 28.7, CH <sub>2</sub>      | 2.45                                          | 23                           | 17, 20, 21, 23, 24               |          |
| 23                   | 28.4, CH <sub>2</sub>      | 2.13                                          | 22, 24                       | 22, 24, 25                       |          |
| 24                   | 122.8, CH                  | 5.09, br t (6.6)                              | 23, 26, 27                   | 23, 26, 27                       | 26       |
| 25                   | 132.9, C                   |                                               |                              |                                  |          |
| 26                   | 25.7, CH <sub>3</sub>      | 1.68, br s                                    | 24                           | 24, 25, 27                       | 24       |
| 27                   | 17.8, CH <sub>3</sub>      | 1.60, br s                                    | 24                           | 24, 25, 26                       |          |
| 28                   | 12.4, CH <sub>3</sub>      | 1.22, d (6.7)                                 | 4                            | 3, 4, 5                          | 6        |
| 30                   | 21.7, CH <sub>3</sub>      | 1.36, s                                       |                              | 7, 8, 9, 14                      | 5, 13    |
| 16-COCH <sub>3</sub> | 170.6, C                   |                                               |                              |                                  |          |
| 16-COCH <sub>3</sub> | 20.5, CH <sub>3</sub>      | 1.96, s                                       |                              | 16-COCH <sub>3</sub>             |          |

<sup>a</sup>The indiscernible signals from overlap or the complex multiplicity are reported without designating multiplicity.

**Table S22** NMR data for **29** ( $^1\text{H}$  for 600 MHz and  $^{13}\text{C}$  for 150 MHz in  $\text{CDCl}_3$ ).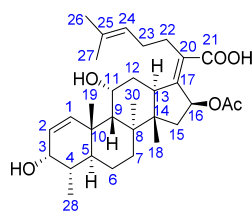**29**

| Position                      | $\delta_{\text{C}}$ , type | $\delta_{\text{H}}$ ( $J$ in Hz) <sup>a</sup>   | $^1\text{H}$ - $^1\text{H}$ COSY | HMBC                                          | ROESY           |
|-------------------------------|----------------------------|-------------------------------------------------|----------------------------------|-----------------------------------------------|-----------------|
| 1                             | 140.1, CH                  | 6.21, d (10.1)                                  | 2                                | 3, 5, 9, 10, 19                               | 3, 11, 19       |
| 2                             | 127.5, CH                  | 5.80, dd (10.1, 4.9)                            | 1, 3                             | 3, 4, 10                                      |                 |
| 3                             | 68.2, CH                   | 3.87, t (4.9)                                   | 2, 4                             | 1, 2, 5, 28                                   | 1, 28           |
| 4                             | 34.7, CH                   | 1.76                                            | 3, 5, 28                         | 5, 10, 28                                     | 19              |
| 5                             | 33.2, CH                   | 2.35                                            | 4, 6a, 6b                        | 1, 3, 4, 6, 10, 19                            | 28, 30          |
| 6                             | 19.7, CH <sub>2</sub>      | a: 1.72<br>b: 1.29                              | 5, 6b, 7a, 7b<br>5, 6a, 7a, 7b   | 10                                            |                 |
| 7                             | 30.1, CH <sub>2</sub>      | a: 1.58<br>b: 1.22                              | 6a, 6b, 7b<br>6a, 6b, 7a         | 8, 30<br>9                                    | 18, 19          |
| 8                             | 39.4, C                    |                                                 |                                  |                                               |                 |
| 9                             | 49.9, CH                   | 1.71, d (1.8)                                   | 11                               | 1, 7, 8, 10, 11, 14, 19, 30                   | 12b, 18, 19     |
| 10                            | 37.9, C                    |                                                 |                                  |                                               |                 |
| 11                            | 67.6, CH                   | 4.42, br s                                      | 9, 12a, 12b                      | 8, 13                                         | 1, 19           |
| 12                            | 34.1, CH <sub>2</sub>      | a: 2.38<br>b: 1.88, td (12.7, 3.1)              | 11, 12b, 13<br>11, 12a, 13       | 14<br>13                                      | 9, 18           |
| 13                            | 43.9, CH                   | 3.01, br d (12.4)                               | 12a, 12b                         | 12, 14, 17, 18, 20                            | 15a, 16, 30     |
| 14                            | 48.8, C                    |                                                 |                                  |                                               |                 |
| 15                            | 39.0, CH <sub>2</sub>      | a: 2.21, dd (14.6, 9.0)<br>b: 1.28, br d (14.4) | 15b, 16<br>15a, 16               | 8, 14, 16, 18<br>13, 14, 16, 17, 18           | 13, 30<br>18    |
| 16                            | 74.4, CH                   | 5.86, br d (8.6)                                | 15a, 15b                         | 13, 14, 17, 20, 16- <u>C</u> OCH <sub>3</sub> | 13              |
| 17                            | 149.7, C                   |                                                 |                                  |                                               |                 |
| 18                            | 17.3, CH <sub>3</sub>      | 0.90, s                                         |                                  | 8, 13, 14, 15                                 | 7a, 9, 12b, 15b |
| 19                            | 27.8, CH <sub>3</sub>      | 1.00, s                                         |                                  | 1, 5, 9, 10                                   | 1, 4, 7a, 9, 11 |
| 20                            | 129.9, C                   |                                                 |                                  |                                               |                 |
| 21                            | 174.2, C                   |                                                 |                                  |                                               |                 |
| 22                            | 28.8, CH <sub>2</sub>      | 2.45                                            | 23a, 23b                         | 17, 20, 21, 23, 24                            | 24              |
| 23                            | 28.4, CH <sub>2</sub>      | a: 2.16<br>b: 2.04                              | 22, 23b, 24<br>22, 23a, 24       | 20, 22, 24, 25<br>20, 22, 24, 25              |                 |
| 24                            | 123.0, CH                  | 5.09, br t (7.1)                                | 23a, 23b, 26, 27                 | 23, 26, 27                                    | 22, 26          |
| 25                            | 132.6, C                   |                                                 |                                  |                                               |                 |
| 26                            | 25.7, CH <sub>3</sub>      | 1.67, br s                                      | 24                               | 24, 25, 27                                    | 24              |
| 27                            | 17.8, CH <sub>3</sub>      | 1.59, br s                                      | 24                               | 24, 25, 26                                    |                 |
| 28                            | 13.8, CH <sub>3</sub>      | 0.97, d (6.8)                                   | 4                                | 3, 4, 5                                       | 3, 5            |
| 30                            | 22.4, CH <sub>3</sub>      | 1.34, s                                         |                                  | 7, 8, 9, 14                                   | 5, 13, 15a      |
| 16- <u>C</u> OCH <sub>3</sub> | 170.7, C                   |                                                 |                                  |                                               |                 |
| 16-CO <u>C</u> H <sub>3</sub> | 20.6, CH <sub>3</sub>      | 1.96, s                                         |                                  | 16- <u>C</u> OCH <sub>3</sub>                 |                 |

<sup>a</sup>The indiscernible signals from overlap or the complex multiplicity are reported without designating multiplicity.



**Table S23** NMR data for **30** ( $^1\text{H}$  for 600 MHz and  $^{13}\text{C}$  for 150 MHz in  $\text{CDCl}_3$ ).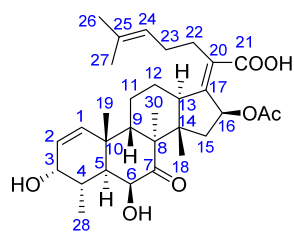**30**

| Position             | $\delta_{\text{C}}$ , type | $\delta_{\text{H}}$ ( $J$ in Hz) <sup>a</sup> | $^1\text{H}$ - $^1\text{H}$ COSY       | HMBC                                     | NOESY         |
|----------------------|----------------------------|-----------------------------------------------|----------------------------------------|------------------------------------------|---------------|
| 1                    | 140.5, CH                  | 6.16, d (10.0)                                | 2                                      | 3, 5, 9, 10                              | 11a, 19, 30   |
| 2                    | 126.9, CH                  | 5.62, dd (10.0, 4.1)                          | 1, 3                                   | 4, 10                                    |               |
| 3                    | 68.7, CH                   | 4.11, t (4.1)                                 | 2, 4                                   | 1, 2, 5                                  | 28            |
| 4                    | 30.8, CH                   | 2.51                                          | 3, 5, 28                               | 5, 10, 28                                | 19            |
| 5                    | 39.7, CH                   | 2.03, br d (10.9)                             | 4, 6                                   | 1, 3, 4, 7, 10, 19                       | 30            |
| 6                    | 73.5, CH                   | 4.02, br s                                    | 5                                      | 4, 5, 7, 8, 10                           | 28            |
| 7                    | 215.8, C                   |                                               |                                        |                                          |               |
| 8                    | 52.2, C                    |                                               |                                        |                                          |               |
| 9                    | 41.9, CH                   | 2.46                                          | 11a, 11b                               | 1, 8, 10, 11, 19, 30                     | 18, 19        |
| 10                   | 37.6, C                    |                                               |                                        |                                          |               |
| 11                   | 24.0, CH <sub>2</sub>      | a: 1.92<br>b: 1.45                            | 9, 11b, 12a, 12b<br>9, 11a, 12a, 12b   | 12, 13<br>9                              | 1, 19         |
| 12                   | 26.0, CH <sub>2</sub>      | a: 2.33<br>b: 1.75                            | 11a, 11b, 12b, 13<br>11a, 11b, 12a, 13 | 9                                        | 18            |
| 13                   | 49.5, CH                   | 2.53                                          | 12a, 12b                               | 12, 14, 17, 18, 20                       | 16, 30        |
| 14                   | 46.4, C                    |                                               |                                        |                                          |               |
| 15                   | 40.8, CH <sub>2</sub>      | a: 2.21, dd (15.2, 8.4)<br>b: 1.92            | 15b, 16<br>15a, 16                     | 8, 14, 18<br>13, 14, 16, 17, 18          | 30<br>18      |
| 16                   | 73.8, CH                   | 5.85, br d (8.3)                              | 15a, 15b                               | 14, 17, 20, 16-COCH <sub>3</sub>         | 13            |
| 17                   | 148.1, C                   |                                               |                                        |                                          |               |
| 18                   | 18.2, CH <sub>3</sub>      | 0.95, s                                       |                                        | 8, 13, 14, 15                            | 9, 12b, 15b   |
| 19                   | 28.7, CH <sub>3</sub>      | 1.31, s                                       |                                        | 1, 5, 9, 10                              | 1, 4, 9, 11a  |
| 20                   | 129.9, C                   |                                               |                                        |                                          |               |
| 21                   | 173.5, C                   |                                               |                                        |                                          |               |
| 22                   | 28.5, CH <sub>2</sub>      | a: 2.51<br>b: 2.43                            | 22b, 23a, 23b<br>22a, 23a, 23b         | 17, 20, 21, 23, 24<br>17, 20, 21, 23, 24 | 24<br>24      |
| 23                   | 28.3, CH <sub>2</sub>      | a: 2.12<br>b: 2.06                            | 22a, 22b, 23b, 24<br>22a, 22b, 23a, 24 | 20, 22, 24, 25<br>20, 22, 24, 25         |               |
| 24                   | 122.9, CH                  | 5.10, br t (7.0)                              | 23a, 23b, 26, 27                       | 23, 26, 27                               | 22a, 22b, 26  |
| 25                   | 132.8, C                   |                                               |                                        |                                          |               |
| 26                   | 25.7, CH <sub>3</sub>      | 1.68, br s                                    | 24                                     | 24, 25, 27                               | 24            |
| 27                   | 17.7, CH <sub>3</sub>      | 1.60, br s                                    | 24                                     | 24, 25, 26                               |               |
| 28                   | 13.4, CH <sub>3</sub>      | 1.11, d (7.0)                                 | 4                                      | 3, 4, 5                                  | 3, 6          |
| 30                   | 17.5, CH <sub>3</sub>      | 1.14, s                                       |                                        | 7, 8, 9, 14                              | 1, 5, 13, 15a |
| 16-COCH <sub>3</sub> | 170.6, C                   |                                               |                                        |                                          |               |
| 16-COCH <sub>3</sub> | 20.6, CH <sub>3</sub>      | 1.97, s                                       |                                        | 16-COCH <sub>3</sub>                     |               |

<sup>a</sup>The indiscernible signals from overlap or the complex multiplicity are reported without designating multiplicity

**Table S24** NMR data for **31** ( $^1\text{H}$  for 600 MHz and  $^{13}\text{C}$  for 150 MHz in  $\text{CDCl}_3$ ).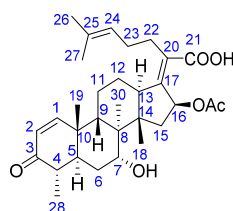**31**

| Position                    | $\delta_c$ , type     | $\delta_H$ ( $J$ in Hz) <sup>a</sup> | $^1\text{H}$ - $^1\text{H}$ COSY       | HMBC                                        | NOESY        |
|-----------------------------|-----------------------|--------------------------------------|----------------------------------------|---------------------------------------------|--------------|
| 1                           | 158.7, CH             | 7.27, d (10.1)                       | 2                                      | 3, 5, 9, 10                                 | 11a, 11b, 19 |
| 2                           | 127.7, CH             | 5.83, d (10.1)                       | 1                                      | 3, 4, 10                                    |              |
| 3                           | 202.3, C              |                                      |                                        |                                             |              |
| 4                           | 42.5, CH              | 2.35                                 | 5, 28                                  | 3, 5, 28                                    | 19           |
| 5                           | 41.9, CH              | 2.35                                 | 4, 6a, 6b                              | 3, 4, 6, 10, 19                             | 28, 30       |
| 6                           | 33.0, CH <sub>2</sub> | a: 1.81<br>b: 1.55                   | 5, 6b, 7<br>5, 6a, 7                   | 5, 7, 8, 10<br>7, 10                        |              |
| 7                           | 69.2, CH              | 4.15, br d (7.4)                     | 6a, 6b                                 | 5, 6, 8, 14, 30                             |              |
| 8                           | 43.8, C               |                                      |                                        |                                             |              |
| 9                           | 44.4, CH              | 1.56                                 | 11a, 11b                               | 7, 8, 10, 30                                | 18           |
| 10                          | 38.7, C               |                                      |                                        |                                             |              |
| 11                          | 25.1, CH <sub>2</sub> | a: 1.88<br>b: 1.48                   | 9, 11b, 12a, 12b<br>9, 11a, 12a, 12b   | 9<br>9, 12, 13                              | 1<br>1       |
| 12                          | 25.7, CH <sub>2</sub> | a: 2.35<br>b: 1.70                   | 11a, 11b, 12b, 13<br>11a, 11b, 12a, 13 | <br>13                                      |              |
| 13                          | 49.2, CH              | 2.52                                 | 12a, 12b                               | 12, 14, 17, 18, 20                          | 16           |
| 14                          | 48.1, C               |                                      |                                        |                                             |              |
| 15                          | 41.2, CH <sub>2</sub> | a: 2.19<br>b: 1.49                   | 15b, 16<br>15a, 16                     | 8, 14, 18<br>13, 14, 18                     | 30           |
| 16                          | 74.3, CH              | 5.85, br d (8.3)                     | 15a, 15b                               | 13, 14, 17, 20, 16- <u>COCH<sub>3</sub></u> | 13           |
| 17                          | 149.1, C              |                                      |                                        |                                             |              |
| 18                          | 18.7, CH <sub>3</sub> | 1.01, s                              |                                        | 8, 13, 14, 15                               | 9            |
| 19                          | 25.6, CH <sub>3</sub> | 1.12, s                              |                                        | 1, 5, 9, 10                                 | 1, 4         |
| 20                          | 130.3, C              |                                      |                                        |                                             |              |
| 21                          | 174.1, C              |                                      |                                        |                                             |              |
| 22                          | 28.6, CH <sub>2</sub> | a: 2.50<br>b: 2.43                   | 22b, 23a, 23b<br>22a, 23a, 23b         | 17, 20, 21, 23, 24<br>17, 20, 21, 23, 24    | 24<br>24     |
| 23                          | 28.2, CH <sub>2</sub> | a: 2.13<br>b: 2.06                   | 22a, 22b, 23b, 24<br>22a, 22b, 23a, 24 | 20, 22, 24, 25<br>20, 22, 24, 25            |              |
| 24                          | 122.9, CH             | 5.09, br t (6.9)                     | 23a, 23b, 26, 27                       | 23, 26, 27                                  | 22a, 22b, 26 |
| 25                          | 132.7, C              |                                      |                                        |                                             |              |
| 26                          | 25.7, CH <sub>3</sub> | 1.68, br s                           | 24                                     | 24, 25, 27                                  | 24           |
| 27                          | 17.7, CH <sub>3</sub> | 1.59, br s                           | 24                                     | 24, 25, 26                                  |              |
| 28                          | 12.6, CH <sub>3</sub> | 1.12, d (6.0)                        | 4                                      | 3, 4, 5                                     | 5            |
| 30                          | 12.2, CH <sub>3</sub> | 0.96, s                              |                                        | 7, 8, 9, 14                                 | 5, 15a       |
| 16- <u>COCH<sub>3</sub></u> | 170.7, C              |                                      |                                        |                                             |              |
| 16-CO <u>CH<sub>3</sub></u> | 20.6, CH <sub>3</sub> | 1.95, s                              |                                        | 16- <u>COCH<sub>3</sub></u>                 |              |

<sup>a</sup>The indiscernible signals from overlap or the complex multiplicity are reported without designating multiplicity.

**Table S25** NMR data for **32** ( $^1\text{H}$  for 600 MHz and  $^{13}\text{C}$  for 150 MHz in  $\text{CDCl}_3$ ).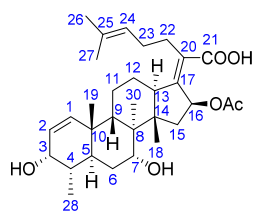**32**

| Position             | $\delta_{\text{C}}$ , type | $\delta_{\text{H}}$ ( $J$ in Hz) <sup>a</sup> | $^1\text{H}$ - $^1\text{H}$ COSY       | HMBC                                     | NOESY           |
|----------------------|----------------------------|-----------------------------------------------|----------------------------------------|------------------------------------------|-----------------|
| 1                    | 140.6, CH                  | 6.09, d (10.1)                                | 2                                      | 3, 5, 9, 10                              | 11a, 19         |
| 2                    | 126.8, CH                  | 5.65, dd (10.1, 4.6)                          | 1, 3                                   | 3, 4, 10                                 |                 |
| 3                    | 68.3, CH                   | 3.90, t (4.4)                                 | 2, 4                                   | 1, 2, 5                                  | 28              |
| 4                    | 33.5, CH                   | 1.83                                          | 3, 5, 28                               | 5, 10, 28                                | 19              |
| 5                    | 34.1, CH                   | 2.14                                          | 4, 6a, 6b                              | 1, 3, 4, 6, 7, 10, 19                    | 28, 30          |
| 6                    | 32.3, CH <sub>2</sub>      | a: 1.76, td (14.1, 8.2)<br>b: 1.46            | 5, 6b, 7<br>5, 6a, 7                   | 4, 5, 7, 8, 10<br>5, 7, 10               | 19, 28<br>28    |
| 7                    | 70.2, CH                   | 4.07, dd (8.1, 3.9)                           | 6a, 6b                                 | 5, 14, 30                                | 9, 18, 19       |
| 8                    | 44.5, C                    |                                               |                                        |                                          |                 |
| 9                    | 45.1, CH                   | 1.51                                          | 11a, 11b                               | 7, 8, 10, 11, 12, 19, 30                 | 7, 18, 19       |
| 10                   | 38.0, C                    |                                               |                                        |                                          |                 |
| 11                   | 24.9, CH <sub>2</sub>      | a: 1.86<br>b: 1.33, qd (13.1, 4.1)            | 9, 11b, 12a, 12b<br>9, 11a, 12a, 12b   | 9, 12                                    | 1<br>30         |
| 12                   | 26.0, CH <sub>2</sub>      | a: 2.29<br>b: 1.65                            | 11a, 11b, 12b, 13<br>11a, 11b, 12a, 13 | 11, 13                                   | 18              |
| 13                   | 49.2, CH                   | 2.49                                          | 12a, 12b                               | 12, 14, 17, 18, 20                       | 16, 30          |
| 14                   | 48.2, C                    |                                               |                                        |                                          |                 |
| 15                   | 41.7, CH <sub>2</sub>      | a: 2.22, dd (14.9, 8.4)<br>b: 1.49            | 15b, 16<br>15a, 16                     | 8, 14, 18<br>13, 14, 16, 17, 18          | 30              |
| 16                   | 74.3, CH                   | 5.84, br d (8.6)                              | 15a, 15b                               | 13, 14, 17, 20, 16-COCH <sub>3</sub>     | 13              |
| 17                   | 149.2, C                   |                                               |                                        |                                          |                 |
| 18                   | 18.2, CH <sub>3</sub>      | 1.00, s                                       |                                        | 8, 13, 14, 15                            | 7, 9, 12b       |
| 19                   | 26.6, CH <sub>3</sub>      | 0.91, s                                       |                                        | 1, 5, 9, 10                              | 1, 4, 6a, 7, 9  |
| 20                   | 129.7, C                   |                                               |                                        |                                          |                 |
| 21                   | 173.2, C                   |                                               |                                        |                                          |                 |
| 22                   | 28.7, CH <sub>2</sub>      | a: 2.51<br>b: 2.42                            | 22b, 23a, 23b<br>22a, 23a, 23b         | 17, 20, 21, 23, 24<br>17, 20, 21, 23, 24 | 24<br>24        |
| 23                   | 28.3, CH <sub>2</sub>      | a: 2.13<br>b: 2.06                            | 22a, 22b, 23b, 24<br>22a, 22b, 23a, 24 | 20, 22, 24, 25<br>20, 22, 24, 25         |                 |
| 24                   | 123.0, CH                  | 5.10, br t (7.3)                              | 23a, 23b, 26, 27                       | 23, 26, 27                               | 22a, 22b, 26    |
| 25                   | 132.7, C                   |                                               |                                        |                                          |                 |
| 26                   | 25.7, CH <sub>3</sub>      | 1.68, br s                                    | 24                                     | 24, 25, 27                               | 24              |
| 27                   | 17.7, CH <sub>3</sub>      | 1.60, br s                                    | 24                                     | 24, 25, 26                               |                 |
| 28                   | 14.0, CH <sub>3</sub>      | 0.98, d (7.0)                                 | 4                                      | 3, 4, 5                                  | 3, 5, 6a, 6b    |
| 30                   | 12.6, CH <sub>3</sub>      | 0.99, s                                       |                                        | 7, 8, 9, 14                              | 5, 11b, 13, 15a |
| 16-COCH <sub>3</sub> | 170.6, C                   |                                               |                                        |                                          |                 |
| 16-COCH <sub>3</sub> | 20.6, CH <sub>3</sub>      | 1.96, s                                       |                                        | 16-COCH <sub>3</sub>                     |                 |

<sup>a</sup>The indiscernible signals from overlap or the complex multiplicity are reported without designating multiplicity.

**Table S26** NMR data for **33** ( $^1\text{H}$  for 600 MHz and  $^{13}\text{C}$  for 150 MHz in  $\text{CDCl}_3$ ).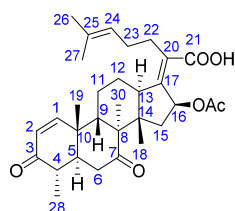**33**

| Position                     | $\delta_{\text{C}}$ , type | $\delta_{\text{H}}$ ( $J$ in Hz) <sup>a</sup> | $^1\text{H}$ - $^1\text{H}$ COSY       | HMBC                                         | NOESY            |
|------------------------------|----------------------------|-----------------------------------------------|----------------------------------------|----------------------------------------------|------------------|
| 1                            | 157.4, CH                  | 7.32, d (10.1)                                | 2                                      | 3, 5, 10, 19                                 | 11a, 19, 30      |
| 2                            | 128.4, CH                  | 5.89, d (10.0)                                | 1                                      | 3, 4, 10                                     |                  |
| 3                            | 201.2, C                   |                                               |                                        |                                              |                  |
| 4                            | 41.9, CH                   | 2.56                                          | 5, 28                                  | 3, 5, 6, 10, 28                              | 19               |
| 5                            | 43.7, CH                   | 2.23                                          | 4, 6a, 6b                              | 1, 3, 4, 6, 7, 10, 19, 28                    | 30               |
| 6                            | 39.8, CH <sub>2</sub>      | a: 2.38<br>b: 2.31, t (14.6)                  | 5, 6b<br>5, 6a                         | 4, 5, 7, 8, 10<br>5, 7, 10                   | 19               |
| 7                            | 215.9, C                   |                                               |                                        |                                              |                  |
| 8                            | 52.1, C                    |                                               |                                        |                                              |                  |
| 9                            | 43.3, CH                   | 2.06                                          | 11a, 11b                               | 1, 8, 10, 11, 30                             | 12b, 18, 19      |
| 10                           | 38.4, C                    |                                               |                                        |                                              |                  |
| 11                           | 24.2, CH <sub>2</sub>      | a: 1.93<br>b: 1.51, qd (13.0, 3.4)            | 9, 11b, 12a, 12b<br>9, 11a, 12a, 12b   | 12<br>8, 9                                   | 1, 19<br>30      |
| 12                           | 25.9, CH <sub>2</sub>      | a: 2.39<br>b: 1.76, qd (13.0, 3.8)            | 11a, 11b, 12b, 13<br>11a, 11b, 12a, 13 | 13                                           | 9, 18            |
| 13                           | 49.3, CH                   | 2.53                                          | 12a, 12b                               | 12, 14, 17, 18, 20                           | 16, 30           |
| 14                           | 46.8, C                    |                                               |                                        |                                              |                  |
| 15                           | 40.6, CH <sub>2</sub>      | a: 2.24<br>b: 1.91                            | 15b, 16<br>15a, 16                     | 8, 14, 18<br>13, 14, 16, 17, 18              | 18               |
| 16                           | 73.6, CH                   | 5.86, br d (8.5)                              | 15a, 15b                               | 13, 14, 17, 20, 16- <u>COCH</u> <sub>3</sub> | 13               |
| 17                           | 147.7, C                   |                                               |                                        |                                              |                  |
| 18                           | 17.4, CH <sub>3</sub>      | 0.89, s                                       |                                        | 8, 13, 14, 15                                | 9, 12b, 15b      |
| 19                           | 25.4, CH <sub>3</sub>      | 1.30, s                                       |                                        | 1, 5, 9, 10                                  | 1, 4, 6b, 9, 11a |
| 20                           | 130.2, C                   |                                               |                                        |                                              |                  |
| 21                           | 173.8, C                   |                                               |                                        |                                              |                  |
| 22                           | 28.6, CH <sub>2</sub>      | a: 2.50<br>b: 2.43                            | 22b, 23a, 23b<br>22a, 23a, 23b         | 17, 20, 21, 23, 24<br>17, 20, 21, 23, 24     | 24<br>24         |
| 23                           | 28.3, CH <sub>2</sub>      | a: 2.13<br>b: 2.07                            | 22a, 22b, 23b, 24<br>22a, 22b, 23a, 24 | 20, 22, 24, 25<br>20, 22, 24, 25             |                  |
| 24                           | 122.8, CH                  | 5.10, br t (7.0)                              | 23a, 23b, 26, 27                       | 23, 26, 27                                   | 22a, 22b, 26     |
| 25                           | 132.8, C                   |                                               |                                        |                                              |                  |
| 26                           | 25.7, CH <sub>3</sub>      | 1.68, br s                                    | 24                                     | 24, 25, 27                                   | 24               |
| 27                           | 17.7, CH <sub>3</sub>      | 1.60, br s                                    | 24                                     | 24, 25, 26                                   |                  |
| 28                           | 13.0, CH <sub>3</sub>      | 1.14, d (6.8)                                 | 4                                      | 3, 4, 5                                      |                  |
| 30                           | 17.7, CH <sub>3</sub>      | 1.11, s                                       |                                        | 7, 8, 9, 14                                  | 1, 5, 11b, 13    |
| 16- <u>COCH</u> <sub>3</sub> | 170.3, C                   |                                               |                                        |                                              |                  |
| 16- <u>COCH</u> <sub>3</sub> | 20.5, CH <sub>3</sub>      | 1.95, s                                       |                                        | 16- <u>COCH</u> <sub>3</sub>                 |                  |

<sup>a</sup>The indiscernible signals from overlap or the complex multiplicity are reported without designating multiplicity.

**Table S27** NMR data for **34** ( $^1\text{H}$  for 600 MHz and  $^{13}\text{C}$  for 150 MHz in  $\text{CDCl}_3$ ).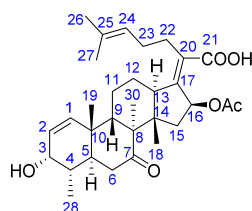**34**

| Position             | $\delta_{\text{C}}$ , type | $\delta_{\text{H}}$ ( $J$ in Hz) <sup>a</sup> | $^1\text{H}$ - $^1\text{H}$ COSY       | HMBC                                     | ROESY              |
|----------------------|----------------------------|-----------------------------------------------|----------------------------------------|------------------------------------------|--------------------|
| 1                    | 139.4, CH                  | 6.20, d (10.0)                                | 2                                      | 3, 5, 9, 10                              | 11a, 11b, 19       |
| 2                    | 127.9, CH                  | 5.67, dd (10.1, 4.1)                          | 1, 3                                   | 3, 4, 10                                 |                    |
| 3                    | 68.2, CH                   | 4.03, t (4.3)                                 | 2, 4                                   | 1, 2, 5                                  | 28                 |
| 4                    | 32.5, CH                   | 2.14                                          | 3, 5, 28                               | 28                                       | 19                 |
| 5                    | 36.3, CH                   | 2.01                                          | 4, 6a, 6b                              | 1, 3, 4, 6, 7, 9, 10, 19                 | 28, 30             |
| 6                    | 38.9, CH <sub>2</sub>      | a: 2.34<br>b: 2.12                            | 5, 6b<br>5, 6a                         | 4, 5, 7, 8, 10<br>4, 5, 7, 10            | 28<br>19, 28       |
| 7                    | 217.7, C                   |                                               |                                        |                                          |                    |
| 8                    | 52.2, C                    |                                               |                                        |                                          |                    |
| 9                    | 43.2, CH                   | 1.91                                          | 11a, 11b                               | 1, 5, 7, 8, 10, 11, 12, 19               | 18, 19             |
| 10                   | 37.9, C                    |                                               |                                        |                                          |                    |
| 11                   | 24.1, CH <sub>2</sub>      | a: 1.89<br>b: 1.41                            | 9, 11b, 12a, 12b<br>9, 11a, 12a, 12b   | 12<br>9                                  | 1, 19<br>1, 13, 30 |
| 12                   | 26.0, CH <sub>2</sub>      | a: 2.32<br>b: 1.71                            | 11a, 11b, 12b, 13<br>11a, 11b, 12a, 13 |                                          | 18                 |
| 13                   | 49.3, CH                   | 2.51                                          | 12a, 12b                               | 12, 14, 17, 18, 20                       | 11b, 15a, 16, 30   |
| 14                   | 46.8, C                    |                                               |                                        |                                          |                    |
| 15                   | 40.6, CH <sub>2</sub>      | a: 2.22, dd (14.8, 8.6)<br>b: 1.89            | 15b, 16<br>15a, 16                     | 8, 14, 18<br>13, 14, 16, 17, 18          | 13, 30<br>18       |
| 16                   | 73.7, CH                   | 5.86, br d (8.5)                              | 15a, 15b                               | 13, 14, 17, 20, 16-COCH <sub>3</sub>     | 13                 |
| 17                   | 147.7, C                   |                                               |                                        |                                          |                    |
| 18                   | 17.4, CH <sub>3</sub>      | 0.86, s                                       |                                        | 8, 13, 14, 15                            | 9, 12b, 15b        |
| 19                   | 25.9, CH <sub>3</sub>      | 1.07, s                                       |                                        | 1, 5, 9, 10                              | 1, 4, 6b, 9, 11a   |
| 20                   | 130.3, C                   |                                               |                                        |                                          |                    |
| 21                   | 173.7, C                   |                                               |                                        |                                          |                    |
| 22                   | 28.6, CH <sub>2</sub>      | a: 2.49<br>b: 2.42                            | 22b, 23a, 23b<br>22a, 23a, 23b         | 17, 20, 21, 23, 24<br>17, 20, 21, 23, 24 | 24<br>24           |
| 23                   | 28.3, CH <sub>2</sub>      | a: 2.12<br>b: 2.06                            | 22a, 22b, 23b, 24<br>22a, 22b, 23a, 24 | 20, 22, 24, 25<br>20, 22, 24, 25         |                    |
| 24                   | 122.9, CH                  | 5.09, br t (7.1)                              | 23a, 23b, 26, 27                       | 23, 26, 27                               | 22a, 22b, 26       |
| 25                   | 132.7, C                   |                                               |                                        |                                          |                    |
| 26                   | 25.7, CH <sub>3</sub>      | 1.68, br s                                    | 24                                     | 24, 25, 27                               | 24                 |
| 27                   | 17.7, CH <sub>3</sub>      | 1.60, br s                                    | 24                                     | 24, 25, 26                               |                    |
| 28                   | 13.9, CH <sub>3</sub>      | 0.99, d (6.8)                                 | 4                                      | 3, 4, 5                                  | 3, 5, 6a, 6b       |
| 30                   | 17.6, CH <sub>3</sub>      | 1.11, s                                       |                                        | 7, 8, 9, 14                              | 5, 11b, 13, 15a    |
| 16-COCH <sub>3</sub> | 170.6, C                   |                                               |                                        |                                          |                    |
| 16-COCH <sub>3</sub> | 20.6, CH <sub>3</sub>      | 1.95, s                                       |                                        | 16-COCH <sub>3</sub>                     |                    |

<sup>a</sup>The indiscernible signals from overlap or the complex multiplicity are reported without designating multiplicity.

**Table S28** NMR data for **35** ( $^1\text{H}$  for 600 MHz and  $^{13}\text{C}$  for 150 MHz in  $\text{CD}_3\text{OD}$ ).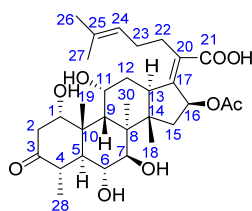**35**

| Position            | $\delta_{\text{C}}$ , type | $\delta_{\text{H}}$ ( $J$ in Hz) <sup>a</sup>      | $^1\text{H}$ - $^1\text{H}$ COSY | HMBC                                     | ROESY           |
|---------------------|----------------------------|----------------------------------------------------|----------------------------------|------------------------------------------|-----------------|
| 1                   | 84.7, CH                   | 3.36, dd (9.5, 7.2)                                | 2a, 2b                           | 5, 19                                    | 11, 19          |
| 2                   | 42.1, $\text{CH}_2$        | a: 2.94, dd (12.4, 9.5)<br>b: 2.59, dd (12.4, 7.2) | 1, 2b<br>1, 2a                   | 1, 3<br>1, 3, 4, 10                      | 5               |
| 3                   | 217.2, C                   |                                                    |                                  |                                          |                 |
| 4                   | 46.9, CH                   | 2.22                                               | 5, 28                            | 3, 5, 6, 28                              | 6, 19           |
| 5                   | 43.6, CH                   | 2.69, t (11.4)                                     | 4, 6                             | 1, 3, 4, 6, 10, 19, 28                   | 2a, 7, 28, 30   |
| 6                   | 81.9, CH                   | 3.78, br d (11.4)                                  | 5, 7                             | 4, 5, 7, 8                               | 4, 9, 19        |
| 7                   | 86.1, CH                   | 3.60, br s                                         | 6                                | 5, 6, 8, 9, 14, 30                       | 5, 15a, 15b, 30 |
| 8                   | 42.1, C                    |                                                    |                                  |                                          |                 |
| 9                   | 47.1, CH                   | 2.45, d (5.5)                                      | 11                               | 1, 7, 8, 10, 14, 19, 30                  | 6, 18, 19       |
| 10                  | 44.2, C                    |                                                    |                                  |                                          |                 |
| 11                  | 78.5, CH                   | 4.11, br dd (7.7, 5.7)                             | 9, 12a, 12b                      | 8, 13                                    | 1, 19           |
| 12                  | 28.7, $\text{CH}_2$        | a: 2.52<br>b: 2.26                                 | 11, 12b, 13<br>11, 12a, 13       | 9, 11, 13, 14<br>11, 13, 17              | 18              |
| 13                  | 45.9, CH                   | 2.97, dd (12.1, 5.8)                               | 12a, 12b                         | 8, 12, 14, 17, 18, 20                    | 16, 30          |
| 14                  | 50.7, C                    |                                                    |                                  |                                          |                 |
| 15                  | 39.0, $\text{CH}_2$        | a: 2.30<br>b: 1.46, br d (14.6)                    | 15b, 16<br>15a, 16               | 8, 14, 18<br>13, 14, 16, 17, 18          | 7, 30<br>7, 18  |
| 16                  | 76.7, CH                   | 5.86, br d (8.7)                                   | 15a, 15b                         | 13, 14, 17, 20, 16- $\text{COCH}_3$      | 13              |
| 17                  | 145.5, C                   |                                                    |                                  |                                          |                 |
| 18                  | 18.9, $\text{CH}_3$        | 1.16, s                                            |                                  | 8, 13, 14, 15                            | 9, 12b, 15b     |
| 19                  | 22.7, $\text{CH}_3$        | 0.93, s                                            |                                  | 1, 5, 9, 10                              | 1, 4, 6, 9, 11  |
| 20                  | 134.0, C                   |                                                    |                                  |                                          |                 |
| 21                  | 174.9, C                   |                                                    |                                  |                                          |                 |
| 22                  | 30.4, $\text{CH}_2$        | a: 2.54<br>b: 2.37                                 | 22b, 23<br>22a, 23               | 17, 20, 21, 23, 24<br>17, 20, 21, 23, 24 | 24<br>24        |
| 23                  | 28.8, $\text{CH}_2$        | 2.11                                               | 22a, 22b, 24                     | 22, 24, 25                               |                 |
| 24                  | 124.4, CH                  | 5.14, br t (7.3)                                   | 23, 26, 27                       | 23, 26, 27                               | 22a, 22b, 26    |
| 25                  | 133.4, C                   |                                                    |                                  |                                          |                 |
| 26                  | 25.9, $\text{CH}_3$        | 1.67, br s                                         | 24                               | 24, 25, 27                               | 24              |
| 27                  | 17.8, $\text{CH}_3$        | 1.61, br s                                         | 24                               | 24, 25, 26                               |                 |
| 28                  | 18.5, $\text{CH}_3$        | 1.28, d (7.1)                                      | 4                                | 3, 4, 5                                  | 5               |
| 30                  | 21.1, $\text{CH}_3$        | 1.32, s                                            |                                  | 7, 8, 9, 14                              | 5, 7, 13, 15a   |
| 16- $\text{COCH}_3$ | 172.6, C                   |                                                    |                                  |                                          |                 |
| 16- $\text{COCH}_3$ | 20.7, $\text{CH}_3$        | 1.98, s                                            |                                  | 16- $\text{COCH}_3$                      |                 |

<sup>a</sup>The indiscernible signals from overlap or the complex multiplicity are reported without designating multiplicity.

**Table S29** NMR data for **36** ( $^1\text{H}$  for 600 MHz and  $^{13}\text{C}$  for 150 MHz in  $\text{CD}_3\text{OD}$ ).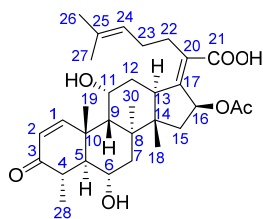**36**

| Position             | $\delta_{\text{C}}$ , type | $\delta_{\text{H}}$ ( $J$ in Hz) <sup>a</sup> | $^1\text{H}$ - $^1\text{H}$ COSY | HMBC                                     | ROESY              |
|----------------------|----------------------------|-----------------------------------------------|----------------------------------|------------------------------------------|--------------------|
| 1                    | 163.9, CH                  | 7.86, d (10.2)                                | 2                                | 3, 5, 9, 10                              | 11, 19             |
| 2                    | 126.1, CH                  | 5.77, d (10.2)                                | 1                                | 4, 10                                    |                    |
| 3                    | 205.6, C                   |                                               |                                  |                                          |                    |
| 4                    | 45.3, CH                   | 2.65                                          | 5, 28                            | 3, 5, 6, 10, 28                          | 6, 19              |
| 5                    | 50.9, CH                   | 2.44, dd (11.8, 9.8)                          | 4, 6                             | 1, 3, 6, 7, 10, 19, 28                   | 28, 30             |
| 6                    | 69.5, CH                   | 3.90                                          | 5, 7a, 7b                        | 8, 10                                    | 4, 9, 19, 28       |
| 7                    | 45.0, CH <sub>2</sub>      | a: 2.09<br>b: 1.28                            | 6, 7b<br>6, 7a                   | 5, 6, 8, 14, 30<br>6                     | 9, 18              |
| 8                    | 40.3, C                    |                                               |                                  |                                          |                    |
| 9                    | 50.6, CH                   | 1.68, br s                                    | 11                               | 1, 8, 10, 11, 14, 19, 30                 | 6, 7a, 12b, 18, 19 |
| 10                   | 40.4, C                    |                                               |                                  |                                          |                    |
| 11                   | 67.4, CH                   | 4.42, br s                                    | 9, 12a, 12b                      | 8, 13                                    | 1, 19              |
| 12                   | 36.8, CH <sub>2</sub>      | a: 2.39<br>b: 1.94                            | 11, 12b, 13<br>11, 12a, 13       | 13                                       | 9, 18              |
| 13                   | 44.2, CH                   | 3.08, br d (12.4)                             | 12a, 12b                         | 14, 17                                   | 15a, 16, 30        |
| 14                   | 49.6, C                    |                                               |                                  |                                          |                    |
| 15                   | 40.1, CH <sub>2</sub>      | a: 2.17<br>b: 1.29                            | 15b, 16<br>15a, 16               | 8, 14, 18<br>13, 14, 16, 17, 18          | 13<br>18           |
| 16                   | 75.7, CH                   | 5.82, br d (8.4)                              | 15a, 15b                         | 14, 17, 20, 16-COCH <sub>3</sub>         | 13                 |
| 17                   | 146.6, C                   |                                               |                                  |                                          |                    |
| 18                   | 17.9, CH <sub>3</sub>      | 0.96, s                                       |                                  | 8, 13, 14, 15                            | 7a, 9, 12b, 15b    |
| 19                   | 28.6, CH <sub>3</sub>      | 1.22, s                                       |                                  | 1, 5, 9, 10                              | 1, 4, 6, 9, 11     |
| 20                   | 134.1, C                   |                                               |                                  |                                          |                    |
| 21                   | 175.1, C                   |                                               |                                  |                                          |                    |
| 22                   | 30.1, CH <sub>2</sub>      | a: 2.57<br>b: 2.38                            | 22b, 23<br>22a, 23               | 17, 20, 21, 23, 24<br>17, 20, 21, 23, 24 | 24<br>24           |
| 23                   | 29.2, CH <sub>2</sub>      | 2.12                                          | 22a, 22b, 24                     | 22, 24, 25                               |                    |
| 24                   | 124.5, CH                  | 5.15, br t (7.0)                              | 23, 26, 27                       | 23, 26, 27                               | 22a, 22b, 26       |
| 25                   | 133.3, C                   |                                               |                                  |                                          |                    |
| 26                   | 25.9, CH <sub>3</sub>      | 1.67, br s                                    | 24                               | 24, 25, 27                               | 24                 |
| 27                   | 17.9, CH <sub>3</sub>      | 1.61, br s                                    | 24                               | 24, 25, 26                               |                    |
| 28                   | 15.8, CH <sub>3</sub>      | 1.32, d (6.8)                                 | 4                                | 3, 4, 5                                  | 5, 6               |
| 30                   | 23.6, CH <sub>3</sub>      | 1.35, s                                       |                                  | 7, 8, 9, 14                              | 5, 13              |
| 16-COCH <sub>3</sub> | 172.7, C                   |                                               |                                  |                                          |                    |
| 16-COCH <sub>3</sub> | 20.7, CH <sub>3</sub>      | 1.97, s                                       |                                  | 16-COCH <sub>3</sub>                     |                    |

<sup>a</sup>The indiscernible signals due to overlap or the complex multiplicity are reported without designating multiplicity.

**Table S30** NMR data for **37** ( $^1\text{H}$  for 600 MHz and  $^{13}\text{C}$  for 150 MHz in  $\text{CD}_3\text{OD}$ ).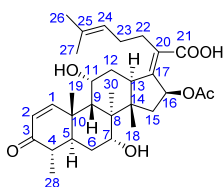**37**

| Position                    | $\delta_{\text{C}}$ , type | $\delta_{\text{H}}$ ( $J$ in Hz) <sup>a</sup> | $^1\text{H}$ - $^1\text{H}$ COSY | HMBC                                        | ROESY          |
|-----------------------------|----------------------------|-----------------------------------------------|----------------------------------|---------------------------------------------|----------------|
| 1                           | 163.9, CH                  | 7.55, d (10.4)                                | 2                                | 2, 3, 5, 9, 10, 19                          | 11, 19         |
| 2                           | 125.9, CH                  | 5.76, d (10.3)                                | 1                                | 10                                          |                |
| 3                           | 204.1, C                   |                                               |                                  |                                             |                |
| 4                           | 44.8, CH                   | 2.33                                          | 5, 28                            | 3, 5, 6, 10, 28                             | 19             |
| 5                           | 43.3, CH                   | 2.68, td (12.3, 7.6)                          | 4, 6a, 6b                        | 1, 3, 4, 6, 9, 10, 19, 28                   | 28, 30         |
| 6                           | 34.8, CH <sub>2</sub>      | a: 1.91<br>b: 1.64                            | 5, 6b, 7<br>5, 6a, 7             | 4, 5, 7, 8<br>5, 7, 10                      | 28             |
| 7                           | 71.0, CH                   | 3.90, t (7.6)                                 | 6a, 6b                           | 6, 8, 9, 14, 30                             | 9, 18, 19      |
| 8                           | 46.0, C                    |                                               |                                  |                                             |                |
| 9                           | 51.2, CH                   | 1.69, d (2.1)                                 | 11                               | 1, 5, 7, 8, 10, 11, 14, 19, 30              | 7, 12b, 18, 19 |
| 10                          | 39.5, C                    |                                               |                                  |                                             |                |
| 11                          | 67.5, CH                   | 4.45, br s                                    | 9, 12a, 12b                      | 8, 9, 10, 13                                | 1, 19          |
| 12                          | 36.4, CH <sub>2</sub>      | a: 2.39<br>b: 1.96                            | 11, 12b, 13<br>11, 12a, 13       | 9, 11, 14<br>13                             | 9, 18, 22a     |
| 13                          | 44.9, CH                   | 3.02, br d (12.4)                             | 12a, 12b                         | 12, 14, 17, 18, 20                          | 15a, 16, 30    |
| 14                          | 49.5, C                    |                                               |                                  |                                             |                |
| 15                          | 43.1, CH <sub>2</sub>      | a: 2.28, dd (15.1, 8.8)<br>b: 1.60            | 15b, 16<br>15a, 16               | 8, 14, 18<br>13, 14, 16, 17, 18             | 13, 30<br>18   |
| 16                          | 76.0, CH                   | 5.77, br d (8.3)                              | 15a, 15b                         | 13, 14, 17, 20, 16- <u>COCH<sub>3</sub></u> | 13             |
| 17                          | 146.9, C                   |                                               |                                  |                                             |                |
| 18                          | 16.8, CH <sub>3</sub>      | 1.01, s                                       |                                  | 8, 13, 14, 15                               | 7, 9, 12b, 15b |
| 19                          | 27.3, CH <sub>3</sub>      | 1.19, s                                       |                                  | 1, 5, 9, 10                                 | 1, 4, 7, 9, 11 |
| 20                          | 132.8, C                   |                                               |                                  |                                             |                |
| 21                          | 174.7, C                   |                                               |                                  |                                             |                |
| 22                          | 30.0, CH <sub>2</sub>      | a: 2.59<br>b: 2.38                            | 22b, 23<br>22a, 23               | 17, 20, 21, 23, 24<br>17, 20, 21, 23, 24    | 12b, 24<br>24  |
| 23                          | 29.3, CH <sub>2</sub>      | 2.12                                          | 22a, 22b, 24                     | 22, 24, 25                                  |                |
| 24                          | 124.4, CH                  | 5.14, br t (7.0)                              | 23, 26, 27                       | 23, 26, 27                                  | 22a, 22b, 26   |
| 25                          | 133.4, C                   |                                               |                                  |                                             |                |
| 26                          | 25.9, CH <sub>3</sub>      | 1.67, br s                                    | 24                               | 24, 25, 27                                  | 24             |
| 27                          | 17.9, CH <sub>3</sub>      | 1.61, br s                                    | 24                               | 24, 25, 26                                  |                |
| 28                          | 12.6, CH <sub>3</sub>      | 1.09, d (6.7)                                 | 4                                | 3, 4, 5                                     | 5, 6b          |
| 30                          | 15.0, CH <sub>3</sub>      | 1.25, s                                       |                                  | 7, 8, 9, 14                                 | 5, 13, 15a     |
| 16- <u>COCH<sub>3</sub></u> | 172.6, C                   |                                               |                                  |                                             |                |
| 16-CO <u>CH<sub>3</sub></u> | 20.7, CH <sub>3</sub>      | 1.95, s                                       |                                  | 16- <u>COCH<sub>3</sub></u>                 |                |

<sup>a</sup>The indiscernible signals due to overlap or the complex multiplicity are reported without designating multiplicity



**Table S31** NMR data for **38** ( $^1\text{H}$  for 400 MHz and  $^{13}\text{C}$  for 100 MHz in  $\text{CD}_3\text{OD}$ ).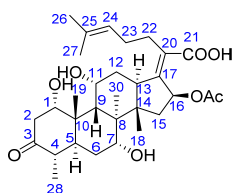**38**

| Position                      | $\delta_c$ , type      | $\delta_H$ ( $J$ in Hz) <sup>a</sup>      | $^1\text{H}$ - $^1\text{H}$ COSY | HMBC                                      | ROESY       |
|-------------------------------|------------------------|-------------------------------------------|----------------------------------|-------------------------------------------|-------------|
| 1                             | 83.8, CH               | 3.44, dd (8.8, 7.5)                       | 2a, 2b                           | 5, 10, 19                                 | 11, 19      |
| 2                             | 42.9, CH <sub>2</sub>  | a: 2.91<br>b: 2.62                        | 1, 2b<br>1, 2a                   | 1, 3<br>1, 3, 10                          |             |
| 3                             | 216.6, C               |                                           |                                  |                                           |             |
| 4                             | 45.2 <sup>b</sup> , CH | 1.91                                      | 5, 28                            | 3, 5, 28                                  | 19          |
| 5                             | 37.1, CH               | 2.86                                      | 4, 6a, 6b                        |                                           | 28, 30      |
| 6                             | 33.4, CH <sub>2</sub>  | a: 2.00<br>b: 1.54                        | 5, 6b, 7<br>5, 6a, 7             | 5, 8                                      |             |
| 7                             | 71.5, CH               | 3.88, dd (9.0, 3.9)                       | 6a, 6b                           | 8, 30                                     | 9, 18       |
| 8                             | 43.2, C                |                                           |                                  |                                           |             |
| 9                             | 52.5, CH               | 1.69                                      | 11                               | 7, 19                                     | 7, 18, 19   |
| 10                            | 43.8, C                |                                           |                                  |                                           |             |
| 11                            | 77.9, CH               | 4.06, br dd (7.0, 5.6)                    | 9, 12a, 12b                      | 8, 10, 13                                 | 1, 19       |
| 12                            | 28.4, CH <sub>2</sub>  | a: 2.56<br>b: 2.24, ddd (15.0, 12.4, 7.6) | 11, 12b, 13<br>11, 12a, 13       | 9, 11, 13, 14<br>13                       | 18          |
| 13                            | 45.1 <sup>b</sup> , CH | 2.93                                      | 12a, 12b                         | 17                                        | 16, 30      |
| 14                            | 49.9, C                |                                           |                                  |                                           |             |
| 15                            | 41.7, CH <sub>2</sub>  | a: 2.40<br>b: 1.49, br d (15.5)           | 15b, 16<br>15a, 16               | 14, 18<br>13, 14, 16, 17, 18              | 30          |
| 16                            | 76.8, CH               | 5.83, br d (8.6)                          | 15a, 15b                         | 14, 17, 20, 16- <u>C</u> OCH <sub>3</sub> | 13          |
| 17                            | 144.8, C               |                                           |                                  |                                           |             |
| 18                            | 16.0, CH <sub>3</sub>  | 0.96, s                                   |                                  | 8, 13, 14, 15                             | 7, 9, 12b   |
| 19                            | 21.7, CH <sub>3</sub>  | 0.85, s                                   |                                  | 1, 5, 9, 10                               | 1, 4, 9, 11 |
| 20                            | 133.4, C               |                                           |                                  |                                           |             |
| 21                            | 174.5                  |                                           |                                  |                                           |             |
| 22                            | 30.4, CH <sub>2</sub>  | a: 2.57<br>b: 2.38                        | 22b, 23<br>22a, 23               | 17, 23<br>17, 23                          |             |
| 23                            | 28.8, CH <sub>2</sub>  | 2.11                                      | 22a, 22b, 24                     | 22, 24, 25                                |             |
| 24                            | 124.4, CH              | 5.15, br t (6.8)                          | 23, 26, 27                       | 23, 26, 27                                | 26          |
| 25                            | 133.4, C               |                                           |                                  |                                           |             |
| 26                            | 25.9, CH <sub>3</sub>  | 1.67, br s                                | 24                               | 24, 25, 27                                | 24          |
| 27                            | 17.8, CH <sub>3</sub>  | 1.61, br s                                | 24                               | 24, 25, 26                                |             |
| 28                            | 15.5, CH <sub>3</sub>  | 1.07, d (7.1)                             | 4                                | 3, 4, 5                                   | 5           |
| 30                            | 18.2, CH <sub>3</sub>  | 1.38, s                                   |                                  | 7, 8, 9, 14                               | 5, 13, 15a  |
| 16- <u>C</u> OCH <sub>3</sub> | 172.5, C               |                                           |                                  |                                           |             |
| 16-CO <u>C</u> H <sub>3</sub> | 20.7, CH <sub>3</sub>  | 1.97, s                                   |                                  | 16- <u>C</u> OCH <sub>3</sub>             |             |

<sup>a</sup>The indiscernible signals due to overlap or the complex multiplicity are reported without designating multiplicity.<sup>b</sup>The data are interchangeable.

**Table S32** NMR data for **39** ( $^1\text{H}$  for 600 MHz and  $^{13}\text{C}$  for 150 MHz in  $\text{CD}_3\text{OD}$ ).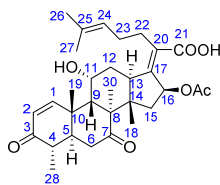**39**

| Position                    | $\delta_{\text{C}}$ , type | $\delta_{\text{H}}$ ( $J$ in Hz) <sup>a</sup> | $^1\text{H}$ - $^1\text{H}$ COSY | HMBC                                     | ROESY         |
|-----------------------------|----------------------------|-----------------------------------------------|----------------------------------|------------------------------------------|---------------|
| 1                           | 163.8, CH                  | 8.27, d (10.3)                                | 2                                | 3, 5, 9, 10                              | 11            |
| 2                           | 127.0, CH                  | 5.79, d (10.3)                                | 1                                | 4, 10                                    |               |
| 3                           | 203.7, C                   |                                               |                                  |                                          |               |
| 4                           | 43.1, CH                   | 2.60                                          | 5, 28                            | 3, 5, 6, 10, 28                          | 19            |
| 5                           | 44.6, CH                   | 2.37                                          | 4, 6a, 6b                        | 1, 4, 6, 7, 10, 19                       | 28, 30        |
| 6                           | 41.1, CH <sub>2</sub>      | a: 2.43<br>b: 2.31                            | 5, 6b<br>5, 6a                   | 5, 10, 7<br>4, 5, 8, 10                  | 19<br>28      |
| 7                           | 219.3, C                   |                                               |                                  |                                          |               |
| 8                           | 54.5, C                    |                                               |                                  |                                          |               |
| 9                           | 47.8, CH                   | 2.02, br s                                    | 11                               | 1, 7, 8, 10, 11, 14, 19, 30              | 18, 19        |
| 10                          | 40.5, C                    |                                               |                                  |                                          |               |
| 11                          | 67.4, CH                   | 4.55, br s                                    | 9, 12a, 12b                      | 8, 13                                    | 1, 19         |
| 12                          | 36.5, CH <sub>2</sub>      | a: 2.40<br>b: 1.96                            | 11, 12b, 13<br>11, 12a, 13       | 11<br>13                                 | 18, 22a       |
| 13                          | 44.6, CH                   | 3.10, br d (11.8)                             | 12a, 12b                         | 12, 14, 17, 18, 20                       | 15a, 16, 30   |
| 14                          | 48.3, C                    |                                               |                                  |                                          |               |
| 15                          | 42.0, CH <sub>2</sub>      | a: 2.29<br>b: 1.79, br d (14.8)               | 15b, 16<br>15a, 16               | 14, 18<br>13, 14, 16, 17, 18             | 13, 30<br>18  |
| 16                          | 75.5, CH                   | 5.80, br d (8.3)                              | 15a, 15b                         | 14, 17, 20, 16- <u>COCH<sub>3</sub></u>  | 13            |
| 17                          | 145.2, C                   |                                               |                                  |                                          |               |
| 18                          | 17.6, CH <sub>3</sub>      | 0.86, s                                       |                                  | 8, 13, 14, 15                            | 9, 12b, 15b   |
| 19                          | 25.8, CH <sub>3</sub>      | 1.37, s                                       |                                  | 1, 5, 9, 10                              | 4, 6a, 9, 11  |
| 20                          | 134.1, C                   |                                               |                                  |                                          |               |
| 21                          | 175.1, C                   |                                               |                                  |                                          |               |
| 22                          | 30.0, CH <sub>2</sub>      | a: 2.56<br>b: 2.38                            | 22b, 23<br>22a, 23               | 17, 20, 21, 23, 24<br>17, 20, 21, 23, 24 | 12b, 24<br>24 |
| 23                          | 29.3, CH <sub>2</sub>      | 2.13                                          | 22a, 22b, 24                     | 22, 24, 25                               |               |
| 24                          | 124.4, CH                  | 5.15, br t (7.2)                              | 23, 26, 27                       | 23, 26, 27                               | 22a, 22b, 26  |
| 25                          | 133.4, C                   |                                               |                                  |                                          |               |
| 26                          | 25.9, CH <sub>3</sub>      | 1.67, br s                                    | 24                               | 24, 25, 27                               | 24            |
| 27                          | 17.9, CH <sub>3</sub>      | 1.61, br s                                    | 24                               | 24, 25, 26                               |               |
| 28                          | 13.1, CH <sub>3</sub>      | 1.11, d (6.8)                                 | 4                                | 3, 4, 5                                  | 5, 6b         |
| 30                          | 22.5, CH <sub>3</sub>      | 1.32, s                                       |                                  | 7, 8, 9, 14                              | 5, 13, 15a    |
| 16- <u>COCH<sub>3</sub></u> | 172.6, C                   |                                               |                                  |                                          |               |
| 16-CO <u>CH<sub>3</sub></u> | 20.7, CH <sub>3</sub>      | 1.96, s                                       |                                  | 16- <u>COCH<sub>3</sub></u>              |               |

<sup>a</sup>The indiscernible signals from overlap or the complex multiplicity are reported without designating multiplicity.

**Table S33** NMR data for **40** ( $^1\text{H}$  for 400 MHz and  $^{13}\text{C}$  for 100 MHz in  $\text{CD}_3\text{OD}$ ).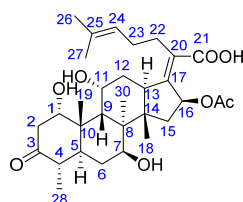**40**

| Position             | $\delta_{\text{C}}$ , type | $\delta_{\text{H}}$ ( $J$ in Hz) <sup>a</sup> | $^1\text{H}$ - $^1\text{H}$ COSY | HMBC                             | ROESY       |
|----------------------|----------------------------|-----------------------------------------------|----------------------------------|----------------------------------|-------------|
| 1                    | 84.1, CH                   | 3.46, t (8.0)                                 | 2a, 2b                           | 5, 19                            | 11, 19      |
| 2                    | 42.9, CH <sub>2</sub>      | a: 2.89, dd (13.4, 9.2)<br>b: 2.63            | 1, 2b<br>1, 2a                   | 1, 3<br>3, 10                    |             |
| 3                    | 216.9, C                   |                                               |                                  |                                  |             |
| 4                    | 45.3, CH                   | 1.93                                          | 5, 28                            |                                  | 19          |
| 5                    | 36.9, CH                   | 2.62                                          | 4, 6a, 6b                        | 3, 10                            | 28, 30      |
| 6                    | 34.0, CH <sub>2</sub>      | a: 2.38<br>b: 1.26                            | 5, 6b, 7<br>5, 6a, 7             |                                  |             |
| 7                    | 73.7, CH                   | 3.93, br d (8.4)                              | 6a, 6b                           | 5, 9, 30                         |             |
| 8                    | 41.8, C                    |                                               |                                  |                                  |             |
| 9                    | 47.0, CH                   | 2.52                                          | 11                               | 1, 8, 10, 11, 12, 14, 30         | 12b, 18, 19 |
| 10                   | 43.9, C                    |                                               |                                  |                                  |             |
| 11                   | 78.7, CH                   | 4.14, br t (6.6)                              | 9, 12a, 12b                      | 8, 13                            | 1, 19       |
| 12                   | 28.7, CH <sub>2</sub>      | a: 2.50<br>b: 2.26                            | 11, 12b, 13<br>11, 12a, 13       |                                  | 9           |
| 13                   | 46.3, CH                   | 2.96, dd (11.7, 5.7)                          | 12a, 12b                         |                                  | 30          |
| 14                   | 50.8, C                    |                                               |                                  |                                  |             |
| 15                   | 38.9, CH <sub>2</sub>      | a: 2.31<br>b: 1.47, br d (14.6)               | 15b, 16<br>15a, 16               | 18<br>13, 14, 16, 17, 18         |             |
| 16                   | 76.7, CH                   | 5.86, br d (8.8)                              | 15a, 15b                         | 14, 17, 20, 16-COCH <sub>3</sub> |             |
| 17                   | 146.6, C                   |                                               |                                  |                                  |             |
| 18                   | 19.0, CH <sub>3</sub>      | 1.17, s                                       |                                  | 8, 13, 14, 15                    | 9           |
| 19                   | 21.3, CH <sub>3</sub>      | 0.96, s                                       |                                  | 1, 5, 9, 10                      | 1, 4, 9, 11 |
| 20                   | 133.0, C                   |                                               |                                  |                                  |             |
| 21                   | 174.1, C                   |                                               |                                  |                                  |             |
| 22                   | 30.3, CH <sub>2</sub>      | a: 2.54<br>b: 2.37                            | 22b, 23<br>22a, 23               | 21                               |             |
| 23                   | 28.8, CH <sub>2</sub>      | 2.11                                          | 22a, 22b, 24                     | 24                               |             |
| 24                   | 124.3, CH                  | 5.14, br t (6.7)                              | 23, 26, 27                       | 23, 26, 27                       | 26          |
| 25                   | 133.5, C                   |                                               |                                  |                                  |             |
| 26                   | 25.9, CH <sub>3</sub>      | 1.67, br s                                    | 24                               | 24, 25, 27                       | 24          |
| 27                   | 17.8, CH <sub>3</sub>      | 1.61, br s                                    | 24                               | 24, 25, 26                       |             |
| 28                   | 15.5, CH <sub>3</sub>      | 1.04, d (7.1)                                 | 4                                | 3, 4, 5                          | 5           |
| 30                   | 22.6, CH <sub>3</sub>      | 1.25, s                                       |                                  | 7, 8, 9, 14                      | 5, 13       |
| 16-COCH <sub>3</sub> | 172.5, C                   |                                               |                                  |                                  |             |
| 16-COCH <sub>3</sub> | 20.7, CH <sub>3</sub>      | 1.97, s                                       |                                  | 16-COCH <sub>3</sub>             |             |

<sup>a</sup>The indiscernible signals from overlap or the complex multiplicity are reported without designating multiplicity.

**Table S34** NMR data for **41** ( $^1\text{H}$  for 400 MHz and  $^{13}\text{C}$  for 100 MHz in  $\text{CD}_3\text{OD}$ ).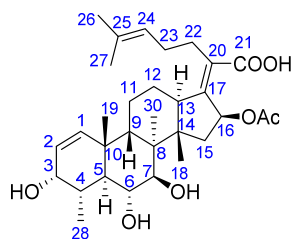**41**

| Position            | $\delta_{\text{C}}$ , type | $\delta_{\text{H}}$ ( $J$ in Hz) <sup>a</sup> | $^1\text{H}$ - $^1\text{H}$ COSY       | HMBC                            | ROESY              |
|---------------------|----------------------------|-----------------------------------------------|----------------------------------------|---------------------------------|--------------------|
| 1                   | 141.2, CH                  | 6.09, d (10.2)                                | 2                                      | 3, 5, 10                        | 11a, 11b, 19       |
| 2                   | 127.5, CH                  | 5.55, dd (10.1, 4.4)                          | 1, 3                                   | 4, 10                           |                    |
| 3                   | 70.4, CH                   | 3.79, t (4.4)                                 | 2, 4                                   |                                 | 28                 |
| 4                   | 36.0, CH                   | 2.16                                          | 3, 5, 28                               |                                 | 19                 |
| 5                   | 43.0, CH                   | 1.90, t (11.2)                                | 4, 6                                   | 3, 4, 6, 7, 10, 19              | 7, 28, 30          |
| 6                   | 77.7, CH                   | 3.59, dd (10.8, 4.5)                          | 5, 7                                   |                                 | 9, 19, 28          |
| 7                   | 85.9, CH                   | 3.51, d (4.6)                                 | 6                                      | 5, 9                            | 5, 30              |
| 8                   | 45.6, C                    |                                               |                                        |                                 |                    |
| 9                   | 42.9, CH                   | 2.05                                          | 11a, 11b                               | 1, 8, 10, 19, 30                | 6, 18, 19          |
| 10                  | 40.6, C                    |                                               |                                        |                                 |                    |
| 11                  | 26.1, $\text{CH}_2$        | a: 1.83<br>b: 1.42, qd (13.3, 4.3)            | 9, 11b, 12a, 12b<br>9, 11a, 12a, 12b   |                                 | 1, 19<br>1, 30     |
| 12                  | 27.4, $\text{CH}_2$        | a: 2.27<br>b: 1.72                            | 11a, 11b, 12b, 13<br>11a, 11b, 12a, 13 |                                 | 18                 |
| 13                  | 50.7, CH                   | 2.61                                          | 12a, 12b                               | 14, 17, 18                      | 16, 30             |
| 14                  | 49.6, C                    |                                               |                                        |                                 |                    |
| 15                  | 41.3, $\text{CH}_2$        | a: 2.15<br>b: 1.61                            | 15b, 16<br>15a, 16                     | 18<br>13, 16, 17                | 30<br>18           |
| 16                  | 76.0, CH                   | 5.78, br d (8.6)                              | 15a, 15b                               | 14, 17, 20, 16- $\text{COCH}_3$ | 13                 |
| 17                  | 146.8, C                   |                                               |                                        |                                 |                    |
| 18                  | 21.5, $\text{CH}_3$        | 1.19, s                                       |                                        | 8, 13, 14, 15                   | 9, 12b, 15b        |
| 19                  | 27.5, $\text{CH}_3$        | 1.11, s                                       |                                        | 1, 5, 9, 10                     | 1, 4, 6, 9, 11a    |
| 20                  | 133.5, C                   |                                               |                                        |                                 |                    |
| 21                  | 175.3, C                   |                                               |                                        |                                 |                    |
| 22                  | 29.9, $\text{CH}_2$        | a: 2.54<br>b: 2.35                            | 22b, 23<br>22a, 23                     |                                 | 24<br>24           |
| 23                  | 29.1, $\text{CH}_2$        | 2.09                                          | 22a, 22b, 24                           | 24, 25                          |                    |
| 24                  | 124.6, CH                  | 5.13, br t (7.2)                              | 23, 26, 27                             | 26, 27                          | 22a, 22b, 26       |
| 25                  | 133.1, C                   |                                               |                                        |                                 |                    |
| 26                  | 25.9, $\text{CH}_3$        | 1.67, br s                                    | 24                                     | 24, 25, 27                      | 24                 |
| 27                  | 17.8, $\text{CH}_3$        | 1.61, br s                                    | 24                                     | 24, 25, 26                      |                    |
| 28                  | 17.0, $\text{CH}_3$        | 1.19, d (6.4)                                 | 4                                      | 3, 4, 5                         | 3, 5, 6            |
| 30                  | 19.6, $\text{CH}_3$        | 1.08, s                                       |                                        | 7, 8, 9, 14                     | 5, 7, 11b, 13, 15a |
| 16- $\text{COCH}_3$ | 172.8, C                   |                                               |                                        |                                 |                    |
| 16- $\text{COCH}_3$ | 20.8, $\text{CH}_3$        | 1.96, s                                       |                                        | 16- $\text{COCH}_3$             |                    |

<sup>a</sup>The indiscernible signals from overlap or the complex multiplicity are reported without designating multiplicity.

**Table S35** NMR data for **42** ( $^1\text{H}$  for 600 MHz and  $^{13}\text{C}$  for 150 MHz in  $\text{CD}_3\text{OD}$ ).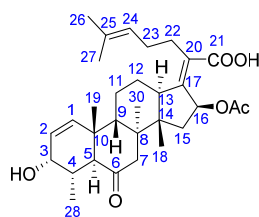**42**

| Position             | $\delta_{\text{C}}$ , type | $\delta_{\text{H}}$ ( $J$ in Hz) <sup>a</sup>      | $^1\text{H}$ - $^1\text{H}$ COSY       | HMBC                                     | ROESY            |
|----------------------|----------------------------|----------------------------------------------------|----------------------------------------|------------------------------------------|------------------|
| 1                    | 138.4, CH                  | 6.16, d (10.1)                                     | 2                                      | 3, 5, 9, 10                              | 11a, 11b, 19     |
| 2                    | 129.1, CH                  | 5.67, dd (10.1, 4.4)                               | 1, 3                                   | 3, 4, 10                                 |                  |
| 3                    | 67.9, CH                   | 3.90, t (4.6)                                      | 2, 4                                   | 1, 2, 5                                  | 28               |
| 4                    | 31.1, CH                   | 2.22                                               | 3, 5, 28                               | 5, 10, 28                                | 19               |
| 5                    | 53.4, CH                   | 3.35, d (11.9)                                     | 4                                      | 1, 3, 4, 6, 10, 19                       | 28, 30           |
| 6                    | 216.1, C                   |                                                    |                                        |                                          |                  |
| 7                    | 52.8, CH <sub>2</sub>      | a: 2.46, d (17.6)<br>b: 2.18, d (17.6)             | 7b<br>7a                               | 5, 6, 8, 14, 30<br>6, 8, 9, 30           | 9, 18<br>30      |
| 8                    | 43.2, C                    |                                                    |                                        |                                          |                  |
| 9                    | 47.5, CH                   | 1.64, dd (13.1, 3.2)                               | 11a, 11b                               | 8, 10, 19, 30                            | 7a, 18, 19       |
| 10                   | 43.3, C                    |                                                    |                                        |                                          |                  |
| 11                   | 26.7, CH <sub>2</sub>      | a: 1.87, dq (13.3, 3.0)<br>b: 1.45, qd (13.0, 4.1) | 9, 11b, 12a, 12b<br>9, 11a, 12a, 12b   | 9, 10, 12                                | 1, 19<br>1, 13   |
| 12                   | 27.0, CH <sub>2</sub>      | a: 2.36<br>b: 1.69                                 | 11a, 11b, 12b, 13<br>11a, 11b, 12a, 13 | 11, 13, 14                               | 18, 22a          |
| 13                   | 49.6, CH                   | 2.66, br d (10.9)                                  | 12a, 12b                               | 12, 14, 17, 18, 20                       | 11b, 15a, 16, 30 |
| 14                   | 49.5, C                    |                                                    |                                        |                                          |                  |
| 15                   | 40.2, CH <sub>2</sub>      | a: 2.11<br>b: 1.24, br d (14.2)                    | 15b, 16<br>15a, 16                     | 8, 13, 14, 18<br>14, 16, 17, 18          | 13, 30<br>18     |
| 16                   | 75.4, CH                   | 5.80, br d (8.5)                                   | 15a, 15b                               | 13, 14, 17, 20, 16-COCH <sub>3</sub>     | 13               |
| 17                   | 146.3, C                   |                                                    |                                        |                                          |                  |
| 18                   | 19.0, CH <sub>3</sub>      | 0.97, s                                            |                                        | 8, 13, 14, 15                            | 7a, 9, 12b, 15b  |
| 19                   | 28.4, CH <sub>3</sub>      | 0.93, s                                            |                                        | 1, 5, 9, 10                              | 1, 4, 9, 11a     |
| 20                   | 133.8, C                   |                                                    |                                        |                                          |                  |
| 21                   | 174.7, C                   |                                                    |                                        |                                          |                  |
| 22                   | 29.9, CH <sub>2</sub>      | a: 2.55<br>b: 2.36                                 | 22b, 23<br>22a, 23                     | 17, 20, 21, 23, 24<br>17, 20, 21, 23, 24 | 12b, 24<br>24    |
| 23                   | 29.1, CH <sub>2</sub>      | 2.10                                               | 22a, 22b, 24                           | 22, 24, 25                               |                  |
| 24                   | 124.4, CH                  | 5.13, br t (7.3)                                   | 23, 26, 27                             | 23, 26, 27                               | 22a, 22b, 26     |
| 25                   | 133.3, C                   |                                                    |                                        |                                          |                  |
| 26                   | 25.9, CH <sub>3</sub>      | 1.67, br s                                         | 24                                     | 24, 25, 27                               | 24               |
| 27                   | 17.8, CH <sub>3</sub>      | 1.61, br s                                         | 24                                     | 24, 25, 26                               |                  |
| 28                   | 14.1, CH <sub>3</sub>      | 1.07, d (6.7)                                      | 4                                      | 3, 4, 5                                  | 3, 5             |
| 30                   | 21.1, CH <sub>3</sub>      | 1.39, s                                            |                                        | 7, 8, 9, 14                              | 5, 7b, 13, 15a   |
| 16-COCH <sub>3</sub> | 172.6, C                   |                                                    |                                        |                                          |                  |
| 16-COCH <sub>3</sub> | 20.7, CH <sub>3</sub>      | 1.96, s                                            |                                        | 16-COCH <sub>3</sub>                     |                  |

<sup>a</sup>The indiscernible signals from overlap or the complex multiplicity are reported without designating multiplicity.

**Table S36** NMR data for **43** ( $^1\text{H}$  for 600 MHz and  $^{13}\text{C}$  for 150 MHz in  $\text{CD}_3\text{OD}$ ).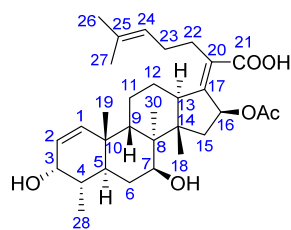**43**

| Position             | $\delta_{\text{C}}$ , type | $\delta_{\text{H}}$ ( $J$ in Hz) <sup>a</sup> | $^1\text{H}$ - $^1\text{H}$ COSY       | HMBC                                     | ROESY            |
|----------------------|----------------------------|-----------------------------------------------|----------------------------------------|------------------------------------------|------------------|
| 1                    | 141.3, CH                  | 6.14, d (10.1)                                | 2                                      | 3, 5, 9, 10, 19                          | 11a, 11b, 19     |
| 2                    | 128.3, CH                  | 5.53, dd (10.0, 4.2)                          | 1, 3                                   | 3, 4, 10                                 |                  |
| 3                    | 69.1, CH                   | 3.88, t (4.5)                                 | 2, 4                                   | 1, 2, 4, 5                               | 28               |
| 4                    | 34.3, CH                   | 1.99                                          | 3, 5, 28                               | 5, 10, 28                                | 19               |
| 5                    | 38.5, CH                   | 1.74                                          | 4, 6a, 6b                              | 1, 3, 4, 6, 7, 10, 19                    | 7, 30            |
| 6                    | 32.3, CH <sub>2</sub>      | a: 1.89<br>b: 1.24, td (12.6, 9.6)            | 5, 6b, 7<br>5, 6a, 7                   | 4, 7, 8, 10<br>5, 7, 10                  |                  |
| 7                    | 81.3, CH                   | 3.78, dd (9.2, 6.9)                           | 6a, 6b                                 | 5, 6, 8, 9, 30                           | 5, 30            |
| 8                    | 46.4, C                    |                                               |                                        |                                          |                  |
| 9                    | 44.6, CH                   | 1.93                                          | 11a, 11b                               | 1, 8, 10, 11, 19, 30                     | 18, 19           |
| 10                   | 39.4, C                    |                                               |                                        |                                          |                  |
| 11                   | 25.9, CH <sub>2</sub>      | a: 1.77<br>b: 1.47                            | 9, 11b, 12a, 12b<br>9, 11a, 12a, 12b   | 9, 12                                    | 1<br>1, 13       |
| 12                   | 27.4, CH <sub>2</sub>      | a: 2.30<br>b: 1.74                            | 11a, 11b, 12b, 13<br>11a, 11b, 12a, 13 | 9, 11, 13, 14                            |                  |
| 13                   | 51.5, CH                   | 2.60, br d (11.5)                             | 12a, 12b                               | 12, 14, 17, 18, 20                       | 11b, 15a, 16, 30 |
| 14                   | 49.5, C                    |                                               |                                        |                                          |                  |
| 15                   | 41.7, CH <sub>2</sub>      | a: 2.15, dd (14.5, 8.8)<br>b: 1.72            | 15b, 16<br>15a, 16                     | 8, 14, 16, 18<br>13, 14, 16, 17, 18      | 13, 30<br>18     |
| 16                   | 76.0, CH                   | 5.78, br d (8.5)                              | 15a, 15b                               | 13, 14, 17, 20, 16-COCH <sub>3</sub>     | 13               |
| 17                   | 147.2, C                   |                                               |                                        |                                          |                  |
| 18                   | 21.3, CH <sub>3</sub>      | 1.18, s                                       |                                        | 8, 13, 14, 15                            | 9, 15b           |
| 19                   | 26.6, CH <sub>3</sub>      | 1.01, s                                       |                                        | 1, 5, 9, 10                              | 1, 4, 9          |
| 20                   | 133.0, C                   |                                               |                                        |                                          |                  |
| 21                   | 174.8, C                   |                                               |                                        |                                          |                  |
| 22                   | 29.8, CH <sub>2</sub>      | a: 2.56<br>b: 2.35                            | 22b, 23<br>22a, 23                     | 17, 20, 21, 23, 24<br>17, 20, 21, 23, 24 | 24<br>24         |
| 23                   | 29.1, CH <sub>2</sub>      | 2.10                                          | 22a, 22b, 24                           | 22, 24, 25                               |                  |
| 24                   | 124.5, CH                  | 5.13, br t (7.3)                              | 23, 26, 27                             | 23, 26, 27                               | 22a, 22b, 26     |
| 25                   | 133.2, C                   |                                               |                                        |                                          |                  |
| 26                   | 25.9, CH <sub>3</sub>      | 1.67, br s                                    | 24                                     | 24, 25, 27                               | 24               |
| 27                   | 17.8, CH <sub>3</sub>      | 1.61, br s                                    | 24                                     | 24, 25, 26                               |                  |
| 28                   | 14.7, CH <sub>3</sub>      | 0.96, d (7.0)                                 | 4                                      | 3, 4, 5                                  | 3                |
| 30                   | 21.8, CH <sub>3</sub>      | 1.03, s                                       |                                        | 7, 8, 9, 14                              | 5, 7, 13, 15a    |
| 16-COCH <sub>3</sub> | 172.8, C                   |                                               |                                        |                                          |                  |
| 16-COCH <sub>3</sub> | 20.8, CH <sub>3</sub>      | 1.95, s                                       |                                        | 16-COCH <sub>3</sub>                     |                  |

<sup>a</sup>The indiscernible signals from overlap or the complex multiplicity are reported without designating multiplicity.

**Table S37** NMR data for **44** ( $^1\text{H}$  for 600 MHz and  $^{13}\text{C}$  for 150 MHz in  $\text{CDCl}_3$ ).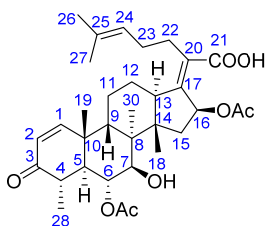**44**

| Position            | $\delta_{\text{C}}$ , type | $\delta_{\text{H}}$ ( $J$ in Hz) <sup>a</sup> | $^1\text{H}$ - $^1\text{H}$ COSY       | HMBC                                     | NOESY              |
|---------------------|----------------------------|-----------------------------------------------|----------------------------------------|------------------------------------------|--------------------|
| 1                   | 158.0, CH                  | 7.25, d (10.3)                                | 2                                      | 3, 5, 9, 10                              | 11a, 19            |
| 2                   | 126.9, CH                  | 5.86, d (10.3)                                | 1                                      | 4, 10                                    |                    |
| 3                   | 201.2, C                   |                                               |                                        |                                          |                    |
| 4                   | 43.2, CH                   | 2.64, dq (12.6, 6.7)                          | 5, 28                                  | 3, 5, 6, 10, 28                          | 19                 |
| 5                   | 45.8, CH                   | 2.40, t (11.7)                                | 4, 6                                   | 1, 3, 4, 6, 10, 19, 28                   | 7, 28, 30          |
| 6                   | 80.1, CH                   | 4.78, dd (10.8, 2.5)                          | 5, 7                                   | 4, 5, 7, 6- $\text{COCH}_3$              | 19, 28             |
| 7                   | 80.7, CH                   | 3.59, d (2.0)                                 | 6                                      | 5, 6, 8, 9, 14, 30                       | 5, 30              |
| 8                   | 43.4, C                    |                                               |                                        |                                          |                    |
| 9                   | 40.7, CH                   | 2.32                                          | 11a, 11b                               | 1, 7, 8, 10, 11, 12, 14, 19, 30          | 18, 19             |
| 10                  | 39.1, C                    |                                               |                                        |                                          |                    |
| 11                  | 25.4, $\text{CH}_2$        | a: 1.99<br>b: 1.45, qd (13.0, 3.8)            | 9, 11b, 12a, 12b<br>9, 11a, 12a, 12b   | 12, 13                                   | 1<br>30            |
| 12                  | 25.5, $\text{CH}_2$        | a: 2.31<br>b: 1.81, qd (12.5, 3.8)            | 11a, 11b, 12b, 13<br>11a, 11b, 12a, 13 | 11, 13                                   | 18                 |
| 13                  | 49.7, CH                   | 2.57, br d (11.2)                             | 12a, 12b                               | 11, 14, 17, 18, 20                       | 30                 |
| 14                  | 48.4, C                    |                                               |                                        |                                          |                    |
| 15                  | 39.9, $\text{CH}_2$        | a: 2.16<br>b: 1.56, br d (14.4)               | 15b, 16<br>15a, 16                     | 8, 14, 16, 18<br>13, 14, 16, 17, 18      | 30<br>18           |
| 16                  | 74.2, CH                   | 5.85, br d (8.2)                              | 15a, 15b                               | 14, 17, 20, 16- $\text{COCH}_3$          |                    |
| 17                  | 149.6, C                   |                                               |                                        |                                          |                    |
| 18                  | 21.4, $\text{CH}_3$        | 1.21, s                                       |                                        | 8, 13, 14, 15                            | 9, 12b, 15b        |
| 19                  | 26.5, $\text{CH}_3$        | 1.38, s                                       |                                        | 1, 5, 9, 10                              | 1, 4, 6, 9         |
| 20                  | 130.3, C                   |                                               |                                        |                                          |                    |
| 21                  | 173.6, C                   |                                               |                                        |                                          |                    |
| 22                  | 28.7, $\text{CH}_2$        | a: 2.49<br>b: 2.43                            | 22b, 23a, 23b<br>22a, 23a, 23b         | 17, 20, 21, 23, 24<br>17, 20, 21, 23, 24 | 24<br>24           |
| 23                  | 28.2, $\text{CH}_2$        | a: 2.13<br>b: 2.06                            | 22a, 22b, 23b, 24<br>22a, 22b, 23a, 24 | 20, 22, 24, 25<br>20, 22, 24, 25         |                    |
| 24                  | 122.9, CH                  | 5.10, br t (6.8)                              | 23a, 23b, 26, 27                       | 26, 27                                   | 22a, 22b, 26       |
| 25                  | 132.7, C                   |                                               |                                        |                                          |                    |
| 26                  | 25.7, $\text{CH}_3$        | 1.68, br s                                    | 24                                     | 24, 25, 27                               | 24                 |
| 27                  | 17.7, $\text{CH}_3$        | 1.60, br s                                    | 24                                     | 24, 25, 26                               |                    |
| 28                  | 14.4, $\text{CH}_3$        | 1.13, d (6.8)                                 | 4                                      | 3, 4, 5                                  | 5, 6               |
| 30                  | 18.2, $\text{CH}_3$        | 1.00, s                                       |                                        | 7, 8, 9, 14                              | 5, 7, 11b, 13, 15a |
| 6- $\text{COCH}_3$  | 171.5, C                   |                                               |                                        |                                          |                    |
| 6- $\text{COCH}_3$  | 21.5, $\text{CH}_3$        | 2.10, s                                       |                                        | 6- $\text{COCH}_3$                       |                    |
| 16- $\text{COCH}_3$ | 170.7, C                   |                                               |                                        |                                          |                    |
| 16- $\text{COCH}_3$ | 20.6, $\text{CH}_3$        | 1.96, s                                       |                                        | 16- $\text{COCH}_3$                      |                    |

<sup>a</sup> The indiscernible signals from overlap or the complex multiplicity are reported without designating multiplicity.

**Table S38** NMR data for **45** ( $^1\text{H}$  for 600 MHz and  $^{13}\text{C}$  for 150 MHz in  $\text{CDCl}_3$ ).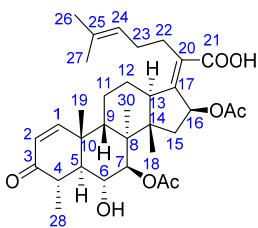**45**

| Position                     | $\delta_{\text{C}}$ , type | $\delta_{\text{H}}$ ( $J$ in Hz) <sup>a</sup>   | $^1\text{H}$ - $^1\text{H}$ COSY       | HMBC                                            | ROESY              |
|------------------------------|----------------------------|-------------------------------------------------|----------------------------------------|-------------------------------------------------|--------------------|
| 1                            | 157.5, CH                  | 7.25, d (10.2)                                  | 2                                      | 3, 5, 9, 10                                     | 11a, 11b, 19       |
| 2                            | 127.3, CH                  | 5.86, d (10.2)                                  | 1                                      | 4, 10                                           |                    |
| 3                            | 202.0, C                   |                                                 |                                        |                                                 |                    |
| 4                            | 43.8, CH                   | 2.63                                            | 5, 28                                  | 3, 5, 6, 10, 28                                 | 6, 19              |
| 5                            | 48.1, CH                   | 2.25, t (11.2)                                  | 4, 6                                   | 1, 3, 4, 6, 7, 10, 28                           | 7, 28, 30          |
| 6                            | 75.3, CH                   | 3.66, dd (10.4, 2.4)                            | 5, 7                                   | 4, 5, 7, 8                                      | 4, 19, 28          |
| 7                            | 83.8, CH                   | 4.67, d (2.2)                                   | 6                                      | 5, 6, 8, 9, 14, 30, 7- <u>COCH</u> <sub>3</sub> | 5, 15a, 15b, 30    |
| 8                            | 42.5, C                    |                                                 |                                        |                                                 |                    |
| 9                            | 41.6, CH                   | 2.23                                            | 11a, 11b                               | 1, 8, 10, 11, 12, 14, 30                        | 12b, 18, 19        |
| 10                           | 38.7, C                    |                                                 |                                        |                                                 |                    |
| 11                           | 25.5, CH <sub>2</sub>      | a: 1.99<br>b: 1.47, qd (13.4, 4.5)              | 9, 11b, 12a, 12b<br>9, 11a, 12a, 12b   | 9, 12                                           | 1, 19<br>1, 13, 30 |
| 12                           | 25.6, CH <sub>2</sub>      | a: 2.35, br d (11.5)<br>b: 1.76, qd (12.5, 3.9) | 11a, 11b, 12b, 13<br>11a, 11b, 12a, 13 | 9, 14<br>13                                     | 9, 18              |
| 13                           | 49.5, CH                   | 2.59                                            | 12a, 12b                               | 12, 17, 18, 20                                  | 11b, 16, 30        |
| 14                           | 48.1, C                    |                                                 |                                        |                                                 |                    |
| 15                           | 39.9, CH <sub>2</sub>      | a: 2.18<br>b: 1.29                              | 15b, 16<br>15a, 16                     | 8, 14, 18<br>13, 16, 17, 18                     | 7, 30<br>7         |
| 16                           | 73.8, CH                   | 5.88, br d (8.3)                                | 15a, 15b                               | 14, 17, 20, 16- <u>COCH</u> <sub>3</sub>        | 13                 |
| 17                           | 148.5, C                   |                                                 |                                        |                                                 |                    |
| 18                           | 21.2, CH <sub>3</sub>      | 1.08, s                                         |                                        | 8, 13, 14, 15                                   | 9, 12b             |
| 19                           | 22.1, CH <sub>3</sub>      | 1.26, s                                         |                                        | 1, 5, 9, 10                                     | 1, 4, 6, 9, 11a    |
| 20                           | 130.9, C                   |                                                 |                                        |                                                 |                    |
| 21                           | 173.5, C                   |                                                 |                                        |                                                 |                    |
| 22                           | 28.7, CH <sub>2</sub>      | a: 2.49<br>b: 2.43                              | 22b, 23a, 23b<br>22a, 23a, 23b         | 17, 20, 21, 23, 24<br>17, 20, 21, 23, 24        | 24<br>24           |
| 23                           | 28.2, CH <sub>2</sub>      | a: 2.14<br>b: 2.07                              | 22a, 22b, 23b, 24<br>22a, 22b, 23a, 24 | 22, 24, 25<br>22, 24, 25                        |                    |
| 24                           | 122.9, CH                  | 5.10, br t (6.8)                                | 23a, 23b, 26, 27                       | 23, 26, 27                                      | 22a, 22b, 26       |
| 25                           | 132.8, C                   |                                                 |                                        |                                                 |                    |
| 26                           | 25.7, CH <sub>3</sub>      | 1.68, br s                                      | 24                                     | 24, 25, 27                                      | 24                 |
| 27                           | 17.8, CH <sub>3</sub>      | 1.60, br s                                      | 24                                     | 24, 25, 26                                      |                    |
| 28                           | 15.3, CH <sub>3</sub>      | 1.33, d (6.8)                                   | 4                                      | 3, 4, 5                                         | 5, 6               |
| 30                           | 17.4, CH <sub>3</sub>      | 1.14, s                                         |                                        | 7, 8, 9, 14                                     | 5, 7, 11b, 13, 15a |
| 7- <u>COCH</u> <sub>3</sub>  | 170.9, C                   |                                                 |                                        |                                                 |                    |
| 7- <u>COCH</u> <sub>3</sub>  | 21.8, CH <sub>3</sub>      | 2.09, s                                         |                                        | 7- <u>COCH</u> <sub>3</sub>                     |                    |
| 16- <u>COCH</u> <sub>3</sub> | 170.6, C                   |                                                 |                                        |                                                 |                    |
| 16- <u>COCH</u> <sub>3</sub> | 20.5, CH <sub>3</sub>      | 1.97, s                                         |                                        | 16- <u>COCH</u> <sub>3</sub>                    |                    |

<sup>a</sup> The indiscernible signals from overlap or the complex multiplicity are reported without designating multiplicity.



**Table S39** NMR data for **46** ( $^1\text{H}$  for 600 MHz and  $^{13}\text{C}$  for 150 MHz in  $\text{CDCl}_3$ ).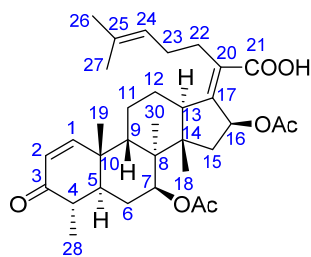**46**

| Position                    | $\delta_{\text{C}}$ , type | $\delta_{\text{H}}$ ( $J$ in Hz) <sup>a</sup> | $^1\text{H}$ - $^1\text{H}$ COSY       | HMBC                                     | NOESY         |
|-----------------------------|----------------------------|-----------------------------------------------|----------------------------------------|------------------------------------------|---------------|
| 1                           | 158.5, CH                  | 7.27, d (10.1)                                | 2                                      | 3, 5, 10                                 | 19            |
| 2                           | 127.6, CH                  | 5.84, d (10.1)                                | 1                                      | 4, 10                                    |               |
| 3                           | 201.7, C                   |                                               |                                        |                                          |               |
| 4                           | 42.7, CH                   | 2.39                                          | 5, 28                                  | 3, 5, 10, 28                             | 19            |
| 5                           | 43.1, CH                   | 2.09                                          | 4, 6a, 6b                              | 4, 6, 7, 9, 10, 19                       | 28, 30        |
| 6                           | 29.7, CH <sub>2</sub>      | a: 2.15<br>b: 1.33                            | 5, 6b, 7<br>5, 6a, 7                   | 5, 7, 10<br>4, 7, 10                     |               |
| 7                           | 77.5, CH                   | 4.96, t (6.8)                                 | 6a, 6b                                 | 6, 9, 14, 30, 7- <u>COCH<sub>3</sub></u> | 30            |
| 8                           | 43.6, C                    |                                               |                                        |                                          |               |
| 9                           | 42.7, CH                   | 2.19                                          | 11a, 11b                               | 7, 8, 10, 11, 12, 19, 30                 | 18            |
| 10                          | 38.7, C                    |                                               |                                        |                                          |               |
| 11                          | 24.9, CH <sub>2</sub>      | a: 1.92<br>b: 1.48                            | 9, 11b, 12a, 12b<br>9, 11a, 12a, 12b   | 9, 12                                    | 19<br>30      |
| 12                          | 25.7, CH <sub>2</sub>      | a: 2.35<br>b: 1.79                            | 11a, 11b, 12b, 13<br>11a, 11a, 12b, 13 | 13                                       | 18            |
| 13                          | 50.3, CH                   | 2.57, br d (11.9)                             | 12a, 12b                               | 11, 14, 17, 18, 20                       | 30            |
| 14                          | 48.0, C                    |                                               |                                        |                                          |               |
| 15                          | 40.3, CH <sub>2</sub>      | a: 2.14<br>b: 1.33                            | 15b, 16<br>15a, 16                     | 8, 14, 18<br>13, 14, 16, 17, 18          |               |
| 16                          | 73.9, CH                   | 5.87, br d (8.5)                              | 15a, 15b                               | 14, 17, 20, 16- <u>COCH<sub>3</sub></u>  |               |
| 17                          | 148.4, C                   |                                               |                                        |                                          |               |
| 18                          | 21.1, CH <sub>3</sub>      | 1.14, s                                       |                                        | 8, 13, 14, 15                            | 9, 12b        |
| 19                          | 25.6, CH <sub>3</sub>      | 1.25, s                                       |                                        | 1, 5, 9, 10                              | 1, 4, 11a     |
| 20                          | 130.7, C                   |                                               |                                        |                                          |               |
| 21                          | 173.4, C                   |                                               |                                        |                                          |               |
| 22                          | 28.7, CH <sub>2</sub>      | a: 2.50<br>b: 2.43                            | 22b, 23a, 23b<br>22a, 23a, 23b         | 17, 20, 21, 24<br>17, 20, 21, 24         |               |
| 23                          | 28.2, CH <sub>2</sub>      | a: 2.14<br>b: 2.07                            | 22a, 22b, 23b, 24<br>22a, 22b, 23a, 24 | 20, 24, 25<br>20, 24, 25                 |               |
| 24                          | 122.9, CH                  | 5.10, br t (6.7)                              | 23a, 23b, 26, 27                       | 26, 27                                   | 26            |
| 25                          | 132.8, C                   |                                               |                                        |                                          |               |
| 26                          | 25.7, CH <sub>3</sub>      | 1.68, br s                                    | 24                                     | 24, 25, 27                               | 24            |
| 27                          | 17.8, CH <sub>3</sub>      | 1.60, br s                                    | 24                                     | 24, 25, 26                               |               |
| 28                          | 12.7, CH <sub>3</sub>      | 1.12, d (6.8)                                 | 4                                      | 3, 4, 5                                  | 5             |
| 30                          | 20.2, CH <sub>3</sub>      | 1.05, s                                       |                                        | 7, 8, 9, 14                              | 5, 7, 11b, 13 |
| 7- <u>COCH<sub>3</sub></u>  | 169.7, C                   |                                               |                                        |                                          |               |
| 7- <u>COCH<sub>3</sub></u>  | 21.9, CH <sub>3</sub>      | 2.02, s                                       |                                        | 7- <u>COCH<sub>3</sub></u>               |               |
| 16- <u>COCH<sub>3</sub></u> | 170.5, C                   |                                               |                                        |                                          |               |
| 16- <u>COCH<sub>3</sub></u> | 20.5, CH <sub>3</sub>      | 1.96, s                                       |                                        | 16- <u>COCH<sub>3</sub></u>              |               |

<sup>a</sup>The indiscernible signals from overlap or the complex multiplicity are reported without designating multiplicity.

**Table S40** NMR data for **47** ( $^1\text{H}$  for 600 MHz and  $^{13}\text{C}$  for 150 MHz in  $\text{CD}_3\text{OD}$ ).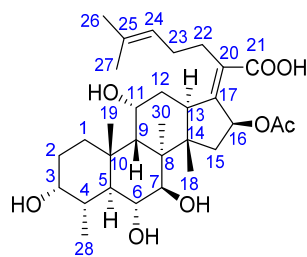**47**

| Position                    | $\delta_{\text{C}}$ , type | $\delta_{\text{H}}$ ( $J$ in Hz) <sup>a</sup> | $^1\text{H}$ - $^1\text{H}$ COSY | HMBC                                            | ROESY         |
|-----------------------------|----------------------------|-----------------------------------------------|----------------------------------|-------------------------------------------------|---------------|
| 1                           | 32.3, $\text{CH}_2$        | a: 2.39                                       | 1b, 2a, 2b                       | 2, 10, 19                                       | 11            |
|                             |                            | b: 1.49                                       | 1a, 2a, 2b                       | 2, 3, 5, 10                                     | 11            |
| 2                           | 31.0, $\text{CH}_2$        | a: 1.91                                       | 1a, 1b, 2b, 3                    | 1, 4                                            |               |
|                             |                            | b: 1.68                                       | 1a, 1b, 2a, 3                    | 4                                               |               |
| 3                           | 73.5, CH                   | 3.64                                          | 2a, 2b, 4                        | 1, 5, 28                                        |               |
| 4                           | 38.5, CH                   | 1.87                                          | 3, 5, 28                         | 5, 28                                           | 6, 19         |
| 5                           | 44.2, CH                   | 2.10                                          | 4, 6                             | 1, 3, 4, 6, 7, 9, 10, 19, 28                    | 28, 30        |
| 6                           | 79.4, CH                   | 3.46, dd (9.4, 2.0)                           | 5, 7                             | 4, 5, 7, 8                                      | 4, 19, 28     |
| 7                           | 83.8, CH                   | 3.44, d (2.0)                                 | 6                                | 5, 6, 8, 9, 14, 30                              | 15a, 15b, 30  |
| 8                           | 45.1, C                    |                                               |                                  |                                                 |               |
| 9                           | 46.7, CH                   | 2.00, d (2.0)                                 | 11                               | 1, 7, 8, 10, 11, 14, 19, 30                     | 18, 19        |
| 10                          | 38.3, C                    |                                               |                                  |                                                 |               |
| 11                          | 68.9, CH                   | 4.36                                          | 9, 12a, 12b                      | 8, 13                                           | 1a, 1b, 19    |
| 12                          | 37.3, $\text{CH}_2$        | a: 2.29, dt (13.0, 3.0)                       | 11, 12b, 13                      | 11, 13, 14                                      |               |
|                             |                            | b: 1.90                                       | 11, 12a, 13                      | 9, 13                                           |               |
| 13                          | 46.3, CH                   | 3.11, br d (11.5)                             | 12a, 12b                         | 12, 14, 17, 18, 20                              | 15a, 30       |
| 14                          | 49.8, C                    |                                               |                                  |                                                 |               |
| 15                          | 40.6, $\text{CH}_2$        | a: 2.20, dd (14.1, 8.6)                       | 15b, 16                          | 8, 14, 16, 18                                   | 7, 13, 30     |
|                             |                            | b: 1.45, br d (14.2)                          | 15a, 16                          | 13, 14, 16, 17, 18                              | 7, 18         |
| 16                          | 76.0, CH                   | 5.81, br d (8.6)                              | 15a, 15b                         | 13, 14, 15, 17, 20, 16- <u>COCH<sub>3</sub></u> |               |
| 17                          | 148.6, C                   |                                               |                                  |                                                 |               |
| 18                          | 21.8, $\text{CH}_3$        | 1.15, s                                       |                                  | 8, 13, 14, 15                                   | 9, 15b        |
| 19                          | 24.2, $\text{CH}_3$        | 1.20, s                                       |                                  | 1, 5, 9, 10                                     | 4, 6, 9, 11   |
| 20                          | 132.8, C                   |                                               |                                  |                                                 |               |
| 21                          | 174.6, C                   |                                               |                                  |                                                 |               |
| 22                          | 30.0, $\text{CH}_2$        | a: 2.53                                       | 22b, 23                          | 17, 20, 21, 23, 24                              |               |
|                             |                            | b: 2.35                                       | 22a, 23                          | 17, 20, 21, 23, 24                              |               |
| 23                          | 29.3, $\text{CH}_2$        | 2.10                                          | 22a, 22b, 24                     | 22, 24, 25                                      |               |
| 24                          | 124.5, CH                  | 5.13, br t (7.3)                              | 23, 26, 27                       | 23, 26, 27                                      | 26            |
| 25                          | 133.3, C                   |                                               |                                  |                                                 |               |
| 26                          | 25.9, $\text{CH}_3$        | 1.66, br s                                    | 24                               | 24, 25, 27                                      | 24            |
| 27                          | 17.9, $\text{CH}_3$        | 1.60, br s                                    | 24                               | 24, 25, 26                                      |               |
| 28                          | 18.5, $\text{CH}_3$        | 1.10, br d (7.0)                              | 4                                | 3, 4, 5                                         | 5, 6          |
| 30                          | 22.0, $\text{CH}_3$        | 1.36, s                                       |                                  | 7, 8, 9, 14                                     | 5, 7, 13, 15a |
| 16- <u>COCH<sub>3</sub></u> | 172.8, C                   |                                               |                                  |                                                 |               |
| 16-CO <u>CH<sub>3</sub></u> | 20.7, $\text{CH}_3$        | 1.96, s                                       |                                  | 16- <u>COCH<sub>3</sub></u>                     |               |

<sup>a</sup>The indiscernible signals from overlap or the complex multiplicity are reported without designating multiplicity.

**Table S41** NMR data for **48** ( $^1\text{H}$  for 600 MHz and  $^{13}\text{C}$  for 150 MHz in  $\text{CD}_3\text{OD}$ ).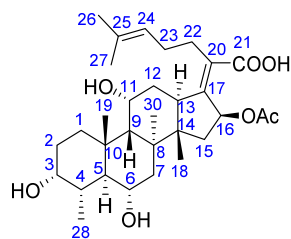**48**

| Position            | $\delta_{\text{C}}$ , type | $\delta_{\text{H}}$ ( $J$ in Hz) <sup>a</sup> | $^1\text{H}$ - $^1\text{H}$ COSY       | HMBC                                     | ROESY        |
|---------------------|----------------------------|-----------------------------------------------|----------------------------------------|------------------------------------------|--------------|
| 1                   | 31.2, $\text{CH}_2$        | a: 2.32<br>b: 1.48                            | 1b, 2a, 2b<br>1a, 2a, 2b               | 2, 10, 19<br>2, 3, 9, 10                 | 11           |
| 2                   | 30.8, $\text{CH}_2$        | a: 1.84<br>b: 1.69                            | 1a, 1b, 2b, 3<br>1a, 1b, 2a, 3         | 1<br>3, 4, 10                            |              |
| 3                   | 73.4, CH                   | 3.64                                          | 2a, 2b, 4                              | 1, 5, 28                                 | 28           |
| 4                   | 38.9, CH                   | 1.78                                          | 3, 5, 28                               | 5, 28                                    | 6            |
| 5                   | 43.9, CH                   | 2.20, dd (11.9, 9.5)                          | 4, 6                                   | 1, 3, 4, 6, 10, 19                       | 28, 30       |
| 6                   | 70.5, CH                   | 3.73, br dd (9.4, 6.7)                        | 5, 7a, 7b                              | 4, 5, 7, 8, 10                           | 4, 19, 28    |
| 7                   | 43.6, $\text{CH}_2$        | a: 1.95<br>b: 1.25                            | 6, 7b<br>6, 7a                         | 5, 6, 8, 9, 14, 30<br>6, 8, 9, 14, 30    |              |
| 8                   | 40.4, C                    |                                               |                                        |                                          |              |
| 9                   | 51.7, CH                   | 1.57, d (1.3)                                 | 11                                     | 1, 8, 10, 11, 12, 14, 19, 30             | 18, 19       |
| 10                  | 37.6, C                    |                                               |                                        |                                          |              |
| 11                  | 68.3, CH                   | 4.33                                          | 9, 12a, 12b                            | 8, 9, 13                                 | 1b, 19       |
| 12                  | 37.3, $\text{CH}_2$        | a: 2.30<br>b: 1.85                            | 11, 12b, 13<br>11, 12a, 13             | 11, 13, 14<br>13, 14                     |              |
| 13                  | 44.4, CH                   | 3.09, br d (11.6)                             | 12a, 12b                               | 12, 14, 17, 18, 20                       | 15a, 16, 30  |
| 14                  | 49.4, C                    |                                               |                                        |                                          |              |
| 15                  | 39.9, $\text{CH}_2$        | a: 2.18<br>b: 1.25                            | 15b, 16<br>15a, 16                     | 8, 14, 18<br>8, 13, 14, 16, 17, 18       | 13, 30<br>18 |
| 16                  | 75.6, CH                   | 5.80, br d (8.6)                              | 15a, 15b                               | 13, 14, 17, 20, 16- $\text{COCH}_3$      | 13           |
| 17                  | 148.4, C                   |                                               |                                        |                                          |              |
| 18                  | 17.6, $\text{CH}_3$        | 0.91, s                                       |                                        | 8, 13, 14, 15                            | 9, 15b       |
| 19                  | 25.9, $\text{CH}_3$        | 0.99, s                                       |                                        | 1, 5, 9, 10                              | 6, 9, 11     |
| 20                  | 132.2, C                   |                                               |                                        |                                          |              |
| 21                  | 174.3, C                   |                                               |                                        |                                          |              |
| 22                  | 29.8, $\text{CH}_2$        | a: 2.53<br>b: 2.35                            | 22b, 23a, 23b<br>22a, 23a, 23b         | 17, 20, 21, 23, 24<br>17, 20, 21, 23, 24 | 24<br>24     |
| 23                  | 29.3, $\text{CH}_2$        | a: 2.12<br>b: 2.06                            | 22a, 22b, 23b, 24<br>22a, 22b, 23a, 24 | 20, 22, 24, 25<br>20, 22, 24, 25         |              |
| 24                  | 124.3, CH                  | 5.12, br t (7.3)                              | 23, 26, 27                             | 23, 26, 27                               | 22a, 22b, 26 |
| 25                  | 133.3, C                   |                                               |                                        |                                          |              |
| 26                  | 26.0, $\text{CH}_3$        | 1.66, br s                                    | 24                                     | 24, 25, 27                               | 24           |
| 27                  | 17.9, $\text{CH}_3$        | 1.60, br s                                    | 24                                     | 24, 25, 26                               |              |
| 28                  | 18.6, $\text{CH}_3$        | 1.12, d (7.0)                                 | 4                                      | 3, 4, 5                                  | 3, 5, 6      |
| 30                  | 23.1, $\text{CH}_3$        | 1.44, s                                       |                                        | 7, 8, 9, 14                              | 5, 13, 15a   |
| 16- $\text{COCH}_3$ | 172.5, C                   |                                               |                                        |                                          |              |
| 16- $\text{COCH}_3$ | 20.7, $\text{CH}_3$        | 1.96, s                                       |                                        | 16- $\text{COCH}_3$                      |              |

<sup>a</sup>The indiscernible signals from overlap or the complex multiplicity are reported without designating multiplicity.

**Table S42** NMR data for **49** ( $^1\text{H}$  for 600 MHz and  $^{13}\text{C}$  for 150 MHz in  $\text{CD}_3\text{OD}$ ).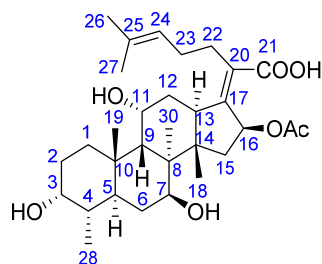**49**

| Position            | $\delta_{\text{C}}$ , type | $\delta_{\text{H}}$ ( $J$ in Hz) <sup>a</sup>            | $^1\text{H}$ - $^1\text{H}$ COSY | HMBC                                     | ROESY         |
|---------------------|----------------------------|----------------------------------------------------------|----------------------------------|------------------------------------------|---------------|
| 1                   | 31.8, $\text{CH}_2$        | a: 2.21<br>b: 1.50                                       | 1b, 2a, 2b<br>1a, 2a, 2b         | 2, 3, 9, 10, 19<br>2, 3, 5               | 11            |
| 2                   | 31.2, $\text{CH}_2$        | a: 1.88<br>b: 1.68                                       | 1a, 1b, 2b, 3<br>1a, 1b, 2a, 3   | 3                                        |               |
| 3                   | 72.4, CH                   | 3.68                                                     | 2a, 2b, 4                        | 1, 5                                     | 28            |
| 4                   | 36.8, CH                   | 1.65                                                     | 3, 5, 28                         | 5, 28                                    | 19            |
| 5                   | 38.0, CH                   | 1.94                                                     | 4, 6a, 6b                        | 1, 3, 4, 6, 7, 10, 19                    | 7, 28, 30     |
| 6                   | 34.0, $\text{CH}_2$        | a: 1.82, ddd (13.4, 6.7, 3.6)<br>b: 1.14, td (12.4, 7.6) | 5, 6b, 7<br>5, 6a, 7             | 5, 7<br>5, 7, 8                          | 28            |
| 7                   | 80.9, CH                   | 3.67                                                     | 6a, 6b                           | 5, 6, 9, 30                              | 5, 30         |
| 8                   | 47.0, C                    |                                                          |                                  |                                          |               |
| 9                   | 48.5, CH                   | 1.87, d (1.9)                                            | 11                               | 1, 8, 10, 11, 14, 19, 30                 | 18, 19        |
| 10                  | 38.4, C                    |                                                          |                                  |                                          |               |
| 11                  | 68.8, CH                   | 4.30                                                     | 9, 12a, 12b                      | 8, 13                                    | 1b, 19        |
| 12                  | 37.4, $\text{CH}_2$        | a: 2.30, dt (12.9, 2.8)<br>b: 1.90                       | 11, 12b, 13<br>11, 12a, 13       | 11, 13, 14<br>13                         | 22a           |
| 13                  | 47.3, CH                   | 3.04, br d (11.4)                                        | 12a, 12b                         | 12, 14, 17, 18, 20                       | 15a, 16, 30   |
| 14                  | 49.9, C                    |                                                          |                                  |                                          |               |
| 15                  | 41.5, $\text{CH}_2$        | a: 2.22<br>b: 1.65                                       | 15b, 16<br>15a, 16               | 8, 14, 16, 18<br>13, 14, 16, 17, 18      | 13, 30<br>18  |
| 16                  | 76.1, CH                   | 5.81, br d (8.5)                                         | 15a, 15b                         | 13, 14, 17, 20, 16- $\text{COCH}_3$      | 13            |
| 17                  | 148.3, C                   |                                                          |                                  |                                          |               |
| 18                  | 21.3, $\text{CH}_3$        | 1.16, s                                                  |                                  | 8, 13, 14, 15                            | 9, 15b        |
| 19                  | 22.0, $\text{CH}_3$        | 1.09, s                                                  |                                  | 1, 5, 9, 10                              | 4, 9, 11      |
| 20                  | 132.9, C                   |                                                          |                                  |                                          |               |
| 21                  | 174.7, C                   |                                                          |                                  |                                          |               |
| 22                  | 30.0, $\text{CH}_2$        | a: 2.54<br>b: 2.35                                       | 22b, 23<br>22a, 23               | 17, 20, 21, 23, 24<br>17, 20, 21, 23, 24 | 12b, 24<br>24 |
| 23                  | 29.3, $\text{CH}_2$        | 2.10                                                     | 22a, 22b, 24                     | 22, 24, 25                               |               |
| 24                  | 124.5, CH                  | 5.13, br t (7.1)                                         | 23, 26, 27                       | 23, 26, 27                               | 22a, 22b, 26  |
| 25                  | 133.2, C                   |                                                          |                                  |                                          |               |
| 26                  | 25.9, $\text{CH}_3$        | 1.66, br s                                               | 24                               | 24, 25, 27                               | 24            |
| 27                  | 17.9, $\text{CH}_3$        | 1.60, br s                                               | 24                               | 24, 25, 26                               |               |
| 28                  | 16.6, $\text{CH}_3$        | 0.89, d (6.8)                                            | 4                                | 3, 4, 5                                  | 3, 5, 6a      |
| 30                  | 25.3, $\text{CH}_3$        | 1.36, s                                                  |                                  | 7, 8, 9, 14                              | 5, 7, 13, 15a |
| 16- $\text{COCH}_3$ | 172.8, C                   |                                                          |                                  |                                          |               |
| 16- $\text{COCH}_3$ | 20.8, $\text{CH}_3$        | 1.96, s                                                  |                                  | 16- $\text{COCH}_3$                      |               |

<sup>a</sup>The indiscernible signals from overlap or the complex multiplicity are reported without designating multiplicity.

**Table S43** NMR data for **50** ( $^1\text{H}$  for 400 MHz and  $^{13}\text{C}$  for 100 MHz in  $\text{CD}_3\text{OD}$ ).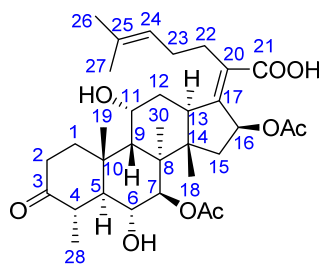**50**

| Position                    | $\delta_{\text{C}}$ , type | $\delta_{\text{H}}$ ( $J$ in Hz) <sup>a</sup> | $^1\text{H}$ - $^1\text{H}$ COSY | HMBC                                        | ROESY         |
|-----------------------------|----------------------------|-----------------------------------------------|----------------------------------|---------------------------------------------|---------------|
| 1                           | 36.4, CH <sub>2</sub>      | a: 2.70<br>b: 1.95                            | 1b, 2<br>1a, 2                   | 3, 10, 19                                   |               |
| 2                           | 37.6, CH <sub>2</sub>      | 2.48                                          | 1a, 1b                           | 1, 3, 10                                    |               |
| 3                           | 218.4, C                   |                                               |                                  |                                             |               |
| 4                           | 47.7, CH                   | 2.54                                          | 5, 28                            | 5, 28                                       | 6, 19         |
| 5                           | 51.3, CH                   | 2.04                                          | 4, 6                             | 1, 4, 6, 7, 10, 19, 28                      | 7, 30         |
| 6                           | 75.2, CH                   | 3.47, dd (9.4, 3.4)                           | 5, 7                             | 4, 5, 7, 8                                  | 4, 19, 28     |
| 7                           | 84.6, CH                   | 4.74, d (3.4)                                 | 6                                | 5, 6, 9, 30, 7- <u>COCH<sub>3</sub></u>     | 5, 15b, 30    |
| 8                           | 45.0, C                    |                                               |                                  |                                             |               |
| 9                           | 47.0, CH                   | 2.03                                          | 11                               | 1, 7, 8, 10, 11, 14, 19, 30                 | 18, 19        |
| 10                          | 38.2, C                    |                                               |                                  |                                             |               |
| 11                          | 68.0, CH                   | 4.37, br s                                    | 9, 12a, 12b                      | 8, 10, 13                                   | 19            |
| 12                          | 37.3, CH <sub>2</sub>      | a: 2.32<br>b: 1.92                            | 11, 12b, 13<br>11, 12a, 13       | 9, 11, 14<br>13                             |               |
| 13                          | 46.3, CH                   | 3.14, br d (11.6)                             | 12a, 12b                         | 12, 14, 17, 18, 20                          | 15a, 16, 30   |
| 14                          | 49.3, C                    |                                               |                                  |                                             |               |
| 15                          | 40.9, CH <sub>2</sub>      | a: 2.21, dd (14.6, 8.9)<br>b: 1.23            | 15b, 16<br>15a, 16               | 14, 18<br>16, 17                            | 13, 30<br>7   |
| 16                          | 75.5, CH                   | 5.81, br d (8.4)                              | 15a, 15b                         | 13, 14, 17, 20, 16- <u>COCH<sub>3</sub></u> | 13            |
| 17                          | 147.7, C                   |                                               |                                  |                                             |               |
| 18                          | 21.2, CH <sub>3</sub>      | 1.03, s                                       |                                  | 8, 13, 14, 15                               | 9             |
| 19                          | 24.7, CH <sub>3</sub>      | 1.23, s                                       |                                  | 1, 5, 9, 10                                 | 4, 6, 9, 11   |
| 20                          | 133.4, C                   |                                               |                                  |                                             |               |
| 21                          | 174.2, C                   |                                               |                                  |                                             |               |
| 22                          | 29.9, CH <sub>2</sub>      | a: 2.53<br>b: 2.37                            | 22b, 23<br>22a, 23               | 17, 20, 21, 23, 24<br>17, 20, 21, 23, 24    | 24<br>24      |
| 23                          | 29.2, CH <sub>2</sub>      | 2.12                                          | 22a, 22b, 24                     | 22, 24, 25                                  |               |
| 24                          | 124.3, CH                  | 5.13, br t (6.6)                              | 23, 26, 27                       | 23, 26, 27                                  | 22a, 22b, 26  |
| 25                          | 133.4, C                   |                                               |                                  |                                             |               |
| 26                          | 25.9, CH <sub>3</sub>      | 1.66, br s                                    | 24                               | 24, 25, 27                                  | 24            |
| 27                          | 17.9, CH <sub>3</sub>      | 1.60, br s                                    | 24                               | 24, 25, 26                                  |               |
| 28                          | 16.1, CH <sub>3</sub>      | 1.17, d (6.7)                                 | 4                                | 3, 4, 5                                     | 6             |
| 30                          | 22.3, CH <sub>3</sub>      | 1.44, s                                       |                                  | 7, 8, 9, 14                                 | 5, 7, 13, 15a |
| 7- <u>COCH<sub>3</sub></u>  | 171.9, C                   |                                               |                                  |                                             |               |
| 7-CO <u>CH<sub>3</sub></u>  | 22.0, CH <sub>3</sub>      | 2.03, s                                       |                                  | 7- <u>COCH<sub>3</sub></u>                  |               |
| 16- <u>COCH<sub>3</sub></u> | 172.6, C                   |                                               |                                  |                                             |               |
| 16-CO <u>CH<sub>3</sub></u> | 20.7, CH <sub>3</sub>      | 1.95, s                                       |                                  | 16- <u>COCH<sub>3</sub></u>                 |               |

<sup>a</sup>The indiscernible signals from overlap or the complex multiplicity are reported without designating multiplicity.

**Table S44** NMR data for **51** ( $^1\text{H}$  for 400 MHz and  $^{13}\text{C}$  for 100 MHz in  $\text{CDCl}_3$ ).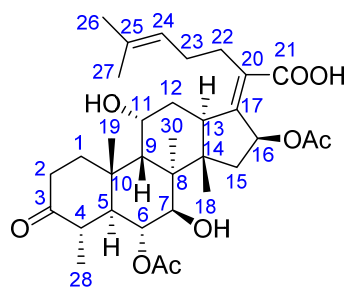**51**

| Position                     | $\delta_{\text{C}}$ , type | $\delta_{\text{H}}$ ( $J$ in Hz) <sup>a</sup> | $^1\text{H}$ - $^1\text{H}$ COSY | HMBC                                     | ROESY       |
|------------------------------|----------------------------|-----------------------------------------------|----------------------------------|------------------------------------------|-------------|
| 1                            | 35.9, CH <sub>2</sub>      | a: 2.59<br>b: 2.00                            | 1b, 2<br>1a, 2                   | 2<br>3, 10                               |             |
| 2                            | 37.4, CH <sub>2</sub>      | 2.47                                          | 1a, 1b                           | 1, 3                                     |             |
| 3                            | 212.8, C                   |                                               |                                  |                                          |             |
| 4                            | 46.2, CH                   | 2.54                                          | 5, 28                            | 3                                        | 6, 19       |
| 5                            | 47.2, CH                   | 2.28, t (10.5)                                | 4, 6                             | 4, 6, 10, 19                             | 7, 28, 30   |
| 6                            | 80.7, CH                   | 4.63, br d (9.4)                              | 5, 7                             | 4, 5, 7, 8, 6- <u>COCH</u> <sub>3</sub>  | 4, 19, 28   |
| 7                            | 79.8, CH                   | 3.46, br s                                    | 6                                | 5, 6, 9, 30                              | 5, 15b, 30  |
| 8                            | 43.7, C                    |                                               |                                  |                                          |             |
| 9                            | 44.8, CH                   | 2.16, br s                                    | 11                               | 8, 10, 11, 14, 19, 30                    | 18, 19      |
| 10                           | 36.7, C                    |                                               |                                  |                                          |             |
| 11                           | 68.3, CH                   | 4.48, br s                                    | 9, 12a, 12b                      | 8, 13                                    | 19          |
| 12                           | 36.3, CH <sub>2</sub>      | a: 2.25<br>b: 2.00                            | 11, 12b, 13<br>11, 12a, 13       | 11, 14                                   |             |
| 13                           | 45.4, CH                   | 3.09, br d (11.6)                             | 12a, 12b                         | 12, 14, 17, 18, 20                       | 16, 30      |
| 14                           | 48.4, C                    |                                               |                                  |                                          |             |
| 15                           | 39.6, CH <sub>2</sub>      | a: 2.21<br>b: 1.48, br d (14.2)               | 15b, 16<br>15a, 16               | 18<br>13, 14, 16, 17                     | 7           |
| 16                           | 74.2, CH                   | 5.90, br d (8.4)                              | 15a, 15b                         | 14, 17, 20, 16- <u>COCH</u> <sub>3</sub> | 13          |
| 17                           | 150.1, C                   |                                               |                                  |                                          |             |
| 18                           | 21.5, CH <sub>3</sub>      | 1.16, s                                       |                                  | 8, 13, 14, 15                            | 9           |
| 19                           | 24.4, CH <sub>3</sub>      | 1.40, s                                       |                                  | 1, 5, 9, 10                              | 4, 6, 9, 11 |
| 20                           | 130.6, C                   |                                               |                                  |                                          |             |
| 21                           | 174.0, C                   |                                               |                                  |                                          |             |
| 22                           | 28.8, CH <sub>2</sub>      | 2.43                                          | 23                               | 17, 20, 21, 23, 24                       | 24          |
| 23                           | 28.3, CH <sub>2</sub>      | 2.09                                          | 22, 24                           | 22, 24                                   |             |
| 24                           | 123.0, CH                  | 5.09, br t (6.7)                              | 23, 26, 27                       | 26, 27                                   | 22, 26      |
| 25                           | 132.7, C                   |                                               |                                  |                                          |             |
| 26                           | 25.7, CH <sub>3</sub>      | 1.67, br s                                    | 24                               | 24, 25, 27                               | 24          |
| 27                           | 17.8, CH <sub>3</sub>      | 1.59, br s                                    | 24                               | 24, 25, 26                               |             |
| 28                           | 13.7, CH <sub>3</sub>      | 0.99, d (6.5)                                 | 4                                | 3, 4, 5                                  | 5, 6        |
| 30                           | 21.1, CH <sub>3</sub>      | 1.26, s                                       |                                  | 7, 8, 9, 14                              | 5, 7, 13    |
| 6- <u>COCH</u> <sub>3</sub>  | 171.3, C                   |                                               |                                  |                                          |             |
| 6- <u>COCH</u> <sub>3</sub>  | 21.6, CH <sub>3</sub>      | 2.06, s                                       |                                  | 6- <u>COCH</u> <sub>3</sub>              |             |
| 16- <u>COCH</u> <sub>3</sub> | 170.8, C                   |                                               |                                  |                                          |             |
| 16- <u>COCH</u> <sub>3</sub> | 20.6, CH <sub>3</sub>      | 1.96, s                                       |                                  | 16- <u>COCH</u> <sub>3</sub>             |             |

<sup>a</sup>The indiscernible signals from overlap or the complex multiplicity are reported without designating multiplicity.

**Table S45** NMR data for **52** ( $^1\text{H}$  for 400 MHz and  $^{13}\text{C}$  for 100 MHz in  $\text{CD}_3\text{OD}$ ).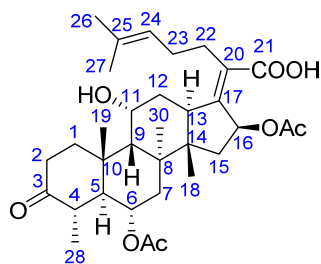**52**

| Position            | $\delta_{\text{C}}$ , type | $\delta_{\text{H}}$ ( $J$ in Hz) <sup>a</sup> | $^1\text{H}$ - $^1\text{H}$ COSY | HMBC                        | ROESY <sup>b</sup> |
|---------------------|----------------------------|-----------------------------------------------|----------------------------------|-----------------------------|--------------------|
| 1                   | 36.0, $\text{CH}_2$        | a: 2.61<br>b: 1.98                            | 1b, 2<br>1a, 2                   | 2                           | 5<br>11            |
| 2                   | 37.8, $\text{CH}_2$        | 2.46                                          | 1a, 1b                           |                             |                    |
| 3                   | 217.0, C                   |                                               |                                  |                             |                    |
| 4                   | 47.1, CH                   | 2.54                                          | 5, 28                            |                             | 6, 19              |
| 5                   | 49.6, CH                   | 2.37, dd (12.4, 9.8)                          | 4, 6                             | 6, 10, 19                   | 1a, 28, 30         |
| 6                   | 74.1, CH                   | 4.95, ddd (10.2, 6.9, 3.6)                    | 5, 7a, 7b                        |                             | 4, 19, 28          |
| 7                   | 41.6, $\text{CH}_2$        | a: 2.14<br>b: 1.20                            | 6, 7b<br>6, 7a                   | 30                          | 9, 18              |
| 8                   | 40.5, C                    |                                               |                                  |                             |                    |
| 9                   | 50.3, CH                   | 1.67                                          | 11                               | 8, 10, 11, 14, 19, 30       | 7a, 12b, 18, 19    |
| 10                  | 37.9, C                    |                                               |                                  |                             |                    |
| 11                  | 67.8, CH                   | 4.33, br s                                    | 9, 12a, 12b                      | 8, 13                       | 1b, 19             |
| 12                  | 37.4, $\text{CH}_2$        | a: 2.32<br>b: 1.89, td (13.0, 2.0)            | 11, 12b, 13<br>11, 12a, 13       | 11, 14                      | 9, 18              |
| 13                  | 44.4, CH                   | 3.07, br d (11.9)                             | 12a, 12b                         | 12, 17                      | 15a, 16, 30        |
| 14                  | 49.4, C                    |                                               |                                  |                             |                    |
| 15                  | 39.8, $\text{CH}_2$        | a: 2.13<br>b: 1.23                            | 15b, 16<br>15a, 16               | 14<br>13                    | 13, 30<br>18       |
| 16                  | 75.6, CH                   | 5.80, br d (8.5)                              | 15a, 15b                         | 14, 17, 16- $\text{COCH}_3$ | 13                 |
| 17                  | 147.0, C                   |                                               |                                  |                             |                    |
| 18                  | 17.8, $\text{CH}_3$        | 0.95, s                                       |                                  | 8, 13, 14, 15               | 7a, 9, 12b, 15b    |
| 19                  | 25.5, $\text{CH}_3$        | 1.18, s                                       |                                  | 1, 5, 9, 10                 | 4, 6, 9, 11        |
| 20                  | 132.8, C                   |                                               |                                  |                             |                    |
| 21                  | #                          |                                               |                                  |                             |                    |
| 22                  | 30.0, $\text{CH}_2$        | a: 2.53<br>b: 2.37                            | 22b, 23<br>22a, 23               |                             | 24<br>24           |
| 23                  | 29.2, $\text{CH}_2$        | 2.11                                          | 22a, 22b, 24                     |                             |                    |
| 24                  | 124.5, CH                  | 5.13, br t (6.5)                              | 23, 26, 27                       | 26, 27                      | 22a, 22b, 26       |
| 25                  | 133.3, C                   |                                               |                                  |                             |                    |
| 26                  | 25.9, $\text{CH}_3$        | 1.66, br s                                    | 24                               | 24, 25, 27                  | 24                 |
| 27                  | 17.8, $\text{CH}_3$        | 1.60, br s                                    | 24                               | 24, 25, 26                  |                    |
| 28                  | 14.9, $\text{CH}_3$        | 1.01, d (6.6)                                 | 4                                | 3, 4, 5                     | 5, 6               |
| 30                  | 23.7, $\text{CH}_3$        | 1.37, s                                       |                                  | 7, 8, 9, 14                 | 5, 13, 15a         |
| 6- $\text{COCH}_3$  | 172.4, C                   |                                               |                                  |                             |                    |
| 6- $\text{COCH}_3$  | 21.7, $\text{CH}_3$        | 2.00, s                                       |                                  | 6- $\text{COCH}_3$          |                    |
| 16- $\text{COCH}_3$ | 172.7, C                   |                                               |                                  |                             |                    |
| 16- $\text{COCH}_3$ | 20.7, $\text{CH}_3$        | 1.96, s                                       |                                  | 16- $\text{COCH}_3$         |                    |

<sup>a</sup>The indiscernible signals from overlap or the complex multiplicity are reported without designating multiplicity.<sup>b</sup>The data were measured in  $\text{CD}_3\text{OD}$  at 600 MHz; # The data is not observed.

**Table S46** NMR data for **55** ( $^1\text{H}$  for 600 MHz and  $^{13}\text{C}$  for 150 MHz in  $\text{CD}_3\text{OD}$ ).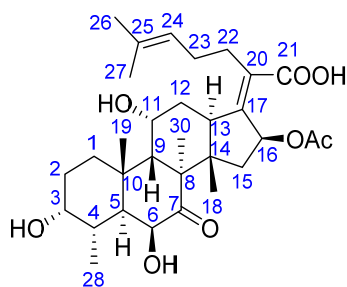**55**

| Position            | $\delta_{\text{C}}$ , type | $\delta_{\text{H}}$ ( $J$ in Hz) <sup>a</sup> | $^1\text{H}$ - $^1\text{H}$ COSY | HMBC                                     | ROESY        |
|---------------------|----------------------------|-----------------------------------------------|----------------------------------|------------------------------------------|--------------|
| 1                   | 33.7, $\text{CH}_2$        | a: 2.20<br>b: 1.53                            | 1b, 2a, 2b<br>1a, 2a, 2b         | 2, 5, 10, 19<br>2, 3, 5, 10              | 11           |
| 2                   | 31.3, $\text{CH}_2$        | a: 1.94<br>b: 1.71                            | 1a, 1b, 2b, 3<br>1a, 1b, 2a, 3   | 3, 4, 10                                 | 19           |
| 3                   | 72.3, CH                   | 3.81, br s                                    | 2a, 2b, 4                        | 1, 4, 5                                  | 28           |
| 4                   | 33.4, CH                   | 2.19                                          | 3, 5, 28                         | 5, 10, 28                                | 19           |
| 5                   | 40.7, CH                   | 2.12                                          | 4, 6                             | 1, 3, 4, 7, 10, 19                       | 28, 30       |
| 6                   | 75.0, CH                   | 3.80, br s                                    | 5                                | 4, 5, 7, 8, 10                           | 28           |
| 7                   | 218.3, C                   |                                               |                                  |                                          |              |
| 8                   | 54.5, C                    |                                               |                                  |                                          |              |
| 9                   | 46.7, CH                   | 2.39, d (1.5)                                 | 11                               | 1, 7, 8, 10, 11, 14, 19, 30              | 12b, 18, 19  |
| 10                  | 38.0, C                    |                                               |                                  |                                          |              |
| 11                  | 67.9, CH                   | 4.41, br s                                    | 9, 12a, 12b                      | 8, 10, 13                                | 1b, 19       |
| 12                  | 37.0, $\text{CH}_2$        | a: 2.34<br>b: 1.88, td (12.6, 2.3)            | 11, 12b, 13<br>11, 12a, 13       | 13                                       | 9, 18        |
| 13                  | 45.2, CH                   | 3.10, br d (11.7)                             | 12a, 12b                         | 12, 14, 17, 18, 20                       | 16, 30       |
| 14                  | 48.0, C                    |                                               |                                  |                                          |              |
| 15                  | 42.0, $\text{CH}_2$        | a: 2.33<br>b: 1.81, br d (14.6)               | 15b, 16<br>15a, 16               | 8, 14, 18<br>13, 14, 16, 17, 18          | 30<br>18     |
| 16                  | 75.6, CH                   | 5.81, br d (8.5)                              | 15a, 15b                         | 13, 14, 15, 17, 20, 16- $\text{COCH}_3$  | 13           |
| 17                  | 147.5, C                   |                                               |                                  |                                          |              |
| 18                  | 18.7, $\text{CH}_3$        | 0.90, s                                       |                                  | 8, 13, 14, 15                            | 9, 12b, 15b  |
| 19                  | 24.3, $\text{CH}_3$        | 1.33, s                                       |                                  | 1, 5, 9, 10                              | 2a, 4, 9, 11 |
| 20                  | 132.5, C                   |                                               |                                  |                                          |              |
| 21                  | 174.2, C                   |                                               |                                  |                                          |              |
| 22                  | 29.8, $\text{CH}_2$        | a: 2.56<br>b: 2.37                            | 22b, 23<br>22a, 23               | 17, 20, 21, 23, 24<br>17, 20, 21, 23, 24 | 24<br>24     |
| 23                  | 29.3, $\text{CH}_2$        | 2.11                                          | 22a, 22b, 24                     | 22, 24, 25                               |              |
| 24                  | 124.3, CH                  | 5.13, br t (7.3)                              | 23, 26, 27                       | 23, 26, 27                               | 22a, 22b, 26 |
| 25                  | 133.4, C                   |                                               |                                  |                                          |              |
| 26                  | 25.9, $\text{CH}_3$        | 1.67, br s                                    | 24                               | 24, 25, 27                               | 24           |
| 27                  | 17.9, $\text{CH}_3$        | 1.61, br s                                    | 24                               | 24, 25, 26                               |              |
| 28                  | 16.1, $\text{CH}_3$        | 0.97, d (6.7)                                 | 4                                | 3, 4, 5                                  | 3, 5, 6      |
| 30                  | 22.8, $\text{CH}_3$        | 1.49, s                                       |                                  | 7, 8, 9, 14                              | 5, 13, 15a   |
| 16- $\text{COCH}_3$ | 172.6, C                   |                                               |                                  |                                          |              |
| 16- $\text{COCH}_3$ | 20.7, $\text{CH}_3$        | 1.96, s                                       |                                  | 16- $\text{COCH}_3$                      |              |

<sup>a</sup>The indiscernible signals from overlap or the complex multiplicity are reported without designating multiplicity.



**Table S47** NMR data for **56** ( $^1\text{H}$  for 600 MHz and  $^{13}\text{C}$  for 150 MHz in  $\text{CD}_3\text{OD}$ ).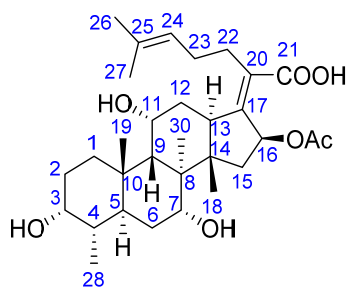**56**

| Position            | $\delta_{\text{C}}$ , type | $\delta_{\text{H}}$ ( $J$ in Hz) <sup>a</sup>   | $^1\text{H}$ - $^1\text{H}$ COSY       | HMBC                                     | ROESY           |
|---------------------|----------------------------|-------------------------------------------------|----------------------------------------|------------------------------------------|-----------------|
| 1                   | 30.6, $\text{CH}_2$        | a: 2.31<br>b: 1.44                              | 1b, 2a, 2b<br>1a, 2a, 2b               | 5, 10, 19                                | 11              |
| 2                   | 30.8, $\text{CH}_2$        | a: 1.81<br>b: 1.68                              | 1a, 1b, 2b, 3<br>1a, 1b, 2a, 3         |                                          | 19              |
| 3                   | 72.0, CH                   | 3.63, br s                                      | 2a, 2b, 4                              | 1, 2, 5                                  | 28              |
| 4                   | 38.9, CH                   | 1.49                                            | 3, 5, 28                               | 10, 28                                   | 19              |
| 5                   | 37.2, CH                   | 2.33                                            | 4, 6a, 6b                              | 4, 6                                     | 28, 30          |
| 6                   | 34.9, $\text{CH}_2$        | a: 1.60<br>b: 1.48                              | 5, 6b, 7<br>5, 6a, 7                   | 4, 5, 7, 8<br>7, 10                      |                 |
| 7                   | 71.4, CH                   | 3.88, t (8.3)                                   | 6a, 6b                                 | 6, 8, 9, 14, 30                          | 9, 18, 19       |
| 8                   | 46.3, C                    |                                                 |                                        |                                          |                 |
| 9                   | 51.8, CH                   | 1.55, br s                                      | 11                                     | 7, 8, 10, 11, 19, 30                     | 7, 18, 19       |
| 10                  | 37.4, C                    |                                                 |                                        |                                          |                 |
| 11                  | 68.5, CH                   | 4.34, br s                                      | 9, 12a, 12b                            | 8, 13                                    | 1b, 19          |
| 12                  | 37.2, $\text{CH}_2$        | a: 2.30<br>b: 1.84                              | 11, 12b, 13<br>11, 12a, 13             | 13                                       | 18, 22a         |
| 13                  | 45.3, CH                   | 3.04, br d (11.8)                               | 12a, 12b                               | 12, 14, 17, 18, 20                       | 16, 30          |
| 14                  | 49.2, C                    |                                                 |                                        |                                          |                 |
| 15                  | 43.0, $\text{CH}_2$        | a: 2.27, dd (14.9, 8.9)<br>b: 1.57, br d (14.9) | 15b, 16<br>15a, 16                     | 8, 14, 18<br>13, 14, 16, 17, 18          | 30              |
| 16                  | 76.0, CH                   | 5.76, br d (8.7)                                | 15a, 15b                               | 13, 14, 15, 17, 20, 16- $\text{COCH}_3$  | 13              |
| 17                  | 147.6, C                   |                                                 |                                        |                                          |                 |
| 18                  | 16.6, $\text{CH}_3$        | 0.99, s                                         |                                        | 8, 13, 14, 15                            | 7, 9, 12b       |
| 19                  | 25.0, $\text{CH}_3$        | 0.97, s                                         |                                        | 1, 5, 9, 10                              | 2a, 4, 7, 9, 11 |
| 20                  | 132.1, C                   |                                                 |                                        |                                          |                 |
| 21                  | 174.7, C                   |                                                 |                                        |                                          |                 |
| 22                  | 29.9, $\text{CH}_2$        | a: 2.55<br>b: 2.35                              | 22b, 23a, 23b<br>22a, 23a, 23b         | 17, 20, 21, 23, 24<br>17, 20, 21, 23, 24 | 12b, 24<br>24   |
| 23                  | 29.4, $\text{CH}_2$        | a: 2.13<br>b: 2.08                              | 22a, 22b, 23b, 24<br>22a, 22b, 23a, 24 | 20, 22, 24, 25<br>20, 22, 24, 25         |                 |
| 24                  | 124.4, CH                  | 5.13, br t (7.3)                                | 23a, 23b, 26, 27                       | 23, 26, 27                               | 22a, 22b, 26    |
| 25                  | 133.3, C                   |                                                 |                                        |                                          |                 |
| 26                  | 25.9, $\text{CH}_3$        | 1.67, br s                                      | 24                                     | 24, 25, 27                               | 24              |
| 27                  | 17.9, $\text{CH}_3$        | 1.61, br s                                      | 24                                     | 24, 25, 26                               |                 |
| 28                  | 16.2, $\text{CH}_3$        | 0.90, d (6.8)                                   | 4                                      | 3, 4, 5                                  | 3, 5            |
| 30                  | 14.9, $\text{CH}_3$        | 1.32, s                                         |                                        | 7, 8, 9, 14                              | 5, 13, 15a      |
| 16- $\text{COCH}_3$ | 172.6, C                   |                                                 |                                        |                                          |                 |
| 16- $\text{COCH}_3$ | 20.7, $\text{CH}_3$        | 1.95, s                                         |                                        | 16- $\text{COCH}_3$                      |                 |

<sup>a</sup>The indiscernible signals from overlap or the complex multiplicity are reported without designating multiplicity.

**Table S48** NMR data for **57** ( $^1\text{H}$  for 600 MHz and  $^{13}\text{C}$  for 150 MHz in  $\text{CD}_3\text{OD}$ ).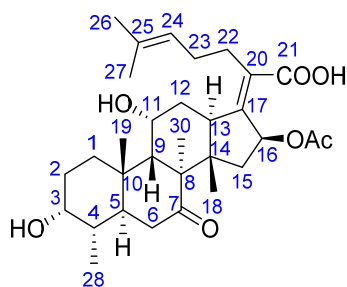**57**

| Position            | $\delta_{\text{C}}$ , type | $\delta_{\text{H}}$ (J in Hz) <sup>a</sup> | $^1\text{H}$ - $^1\text{H}$ COSY | HMBC                                     | ROESY            |
|---------------------|----------------------------|--------------------------------------------|----------------------------------|------------------------------------------|------------------|
| 1                   | 31.7, $\text{CH}_2$        | a: 2.21<br>b: 1.62                         | 1b, 2a, 2b<br>1a, 2a, 2b         | 2, 10, 19<br>2, 3, 5, 10                 | 11, 19           |
| 2                   | 31.2, $\text{CH}_2$        | a: 1.92<br>b: 1.75                         | 1a, 1b, 2b, 3<br>1a, 1b, 2a, 3   |                                          | 19               |
| 3                   | 71.9, CH                   | 3.74, br s                                 | 2a, 2b, 4                        | 1, 5                                     | 28               |
| 4                   | 35.3, CH                   | 1.81                                       | 3, 5, 28                         | 5, 28                                    | 19               |
| 5                   | 37.2, CH                   | 2.23 <sup>b</sup>                          | 4, 6                             | 3, 4, 6, 7, 10, 19                       | 30               |
| 6                   | 40.8, $\text{CH}_2$        | 2.13                                       | 5                                | 5, 7, 8, 10                              |                  |
| 7                   | 222.1, C                   |                                            |                                  |                                          |                  |
| 8                   | 54.7, C                    |                                            |                                  |                                          |                  |
| 9                   | 48.2, CH                   | 1.85                                       | 11                               | 1, 7, 8, 10, 11, 14, 19, 30              | 18, 19           |
| 10                  | 38.4, C                    |                                            |                                  |                                          |                  |
| 11                  | 67.5, CH                   | 4.37, br s                                 | 9, 12a, 12b                      | 8, 13                                    | 1b, 19           |
| 12                  | 36.9, $\text{CH}_2$        | a: 2.32<br>b: 1.85                         | 11, 12b, 13<br>11, 12a, 13       | 11, 14<br>11, 13, 14                     |                  |
| 13                  | 44.9, CH                   | 3.07, br d (11.8)                          | 12a, 12b                         | 12, 14, 17, 18, 20                       | 16, 30           |
| 14                  | 48.4, C                    |                                            |                                  |                                          |                  |
| 15                  | 41.8, $\text{CH}_2$        | a: 2.31<br>b: 1.73, br d (14.8)            | 15b, 16<br>15a, 16               | 8, 14, 18<br>13, 14, 16, 17, 18          | 30<br>18         |
| 16                  | 75.5, CH                   | 5.79, br d (8.5)                           | 15a, 15b                         | 13, 14, 15, 17, 20, 16- $\text{COCH}_3$  | 13               |
| 17                  | 146.5, C                   |                                            |                                  |                                          |                  |
| 18                  | 17.6, $\text{CH}_3$        | 0.82, s                                    |                                  | 8, 13, 14, 15                            | 9, 15b           |
| 19                  | 20.6, $\text{CH}_3$        | 1.08, s                                    |                                  | 1, 5, 9, 10                              | 1b, 2a, 4, 9, 11 |
| 20                  | 133.2, C                   |                                            |                                  |                                          |                  |
| 21                  | 174.6, C                   |                                            |                                  |                                          |                  |
| 22                  | 29.9, $\text{CH}_2$        | a: 2.54<br>b: 2.35                         | 22b, 23<br>22a, 23               | 17, 20, 21, 23, 24<br>17, 20, 21, 23, 24 | 24<br>24         |
| 23                  | 29.3, $\text{CH}_2$        | 2.09                                       | 22a, 22b, 24                     | 22, 24, 25                               |                  |
| 24                  | 124.3, CH                  | 5.13, br t (7.3)                           | 23, 26, 27                       | 23, 26, 27                               | 22a, 22b, 26     |
| 25                  | 133.4, C                   |                                            |                                  |                                          |                  |
| 26                  | 25.9, $\text{CH}_3$        | 1.66, br s                                 | 24                               | 24, 25, 27                               | 24               |
| 27                  | 17.9, $\text{CH}_3$        | 1.60, br s                                 | 24                               | 24, 25, 26                               |                  |
| 28                  | 16.4, $\text{CH}_3$        | 0.88, br d (6.8)                           | 4                                | 3, 4, 5                                  | 3                |
| 30                  | 22.4, $\text{CH}_3$        | 1.48, s                                    |                                  | 7, 8, 9, 14                              | 5, 13, 15a       |
| 16- $\text{COCH}_3$ | 172.6, C                   |                                            |                                  |                                          |                  |
| 16- $\text{COCH}_3$ | 20.7, $\text{CH}_3$        | 1.95, s                                    |                                  | 16- $\text{COCH}_3$                      |                  |

<sup>a</sup>The indiscernible signals from overlap or the complex multiplicity are reported without designating multiplicity.<sup>b</sup>The chemical shift was confirmed by  $^1\text{H}$ - $^1\text{H}$  COSY, HMBC and ROESY.

**Table S49** NMR data for **58** ( $^1\text{H}$  for 400 MHz and  $^{13}\text{C}$  for 100 MHz in  $\text{CD}_3\text{OD}$ ).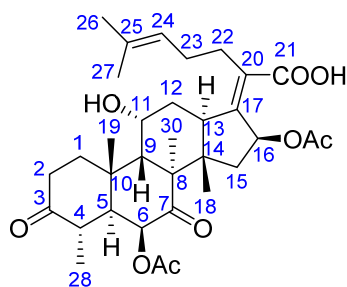**58**

| Position            | $\delta_{\text{C}}$ , type | $\delta_{\text{H}}$ ( $J$ in Hz) <sup>a</sup> | $^1\text{H}$ - $^1\text{H}$ COSY | HMBC                                     | ROESY       |
|---------------------|----------------------------|-----------------------------------------------|----------------------------------|------------------------------------------|-------------|
| 1                   | 36.6, $\text{CH}_2$        | a: 2.49<br>b: 2.01                            | 1b, 2<br>1a, 2                   | 19<br>3, 5                               |             |
| 2                   | 38.2, $\text{CH}_2$        | 2.51                                          | 1a, 1b                           | 3, 10                                    |             |
| 3                   | 215.4, C                   |                                               |                                  |                                          |             |
| 4                   | 43.1, CH                   | 2.61                                          | 5, 28                            | 3, 5, 28                                 | 6, 19       |
| 5                   | 47.1, CH                   | 2.23, br d (12.1)                             | 4, 6                             | 3, 4, 7, 10, 19, 28                      | 28, 30      |
| 6                   | 74.9, CH                   | 5.17, br s                                    | 5                                | 4, 5, 7, 8, 10, 6- $\text{COCH}_3$       | 4, 28       |
| 7                   | 211.7, C                   |                                               |                                  |                                          |             |
| 8                   | 54.9, C                    |                                               |                                  |                                          |             |
| 9                   | 46.2, CH                   | 2.44, br s                                    | 11                               | 7, 8, 10, 11, 12, 19, 30                 | 12b, 18, 19 |
| 10                  | 37.3, C                    |                                               |                                  |                                          |             |
| 11                  | 67.6, CH                   | 4.50, br s                                    | 9, 12a, 12b                      | 8, 10, 13                                | 19          |
| 12                  | 36.8, $\text{CH}_2$        | a: 2.37<br>b: 1.99                            | 11, 12b, 13<br>11, 12a, 13       | 9, 11, 14<br>13                          | 9           |
| 13                  | 44.9, CH                   | 3.13, br d (12.0)                             | 12a, 12b                         | 11, 12, 14, 17, 18, 20                   | 16, 30      |
| 14                  | 48.2, C                    |                                               |                                  |                                          |             |
| 15                  | 41.7, $\text{CH}_2$        | a: 2.34<br>b: 1.74, br d (14.5)               | 15b, 16<br>15a, 16               | 8, 14, 18<br>13, 14, 16, 17, 18          | 30<br>18    |
| 16                  | 75.3, CH                   | 5.81, br d (8.1)                              | 15a, 15b                         | 13, 14, 17, 20, 16- $\text{COCH}_3$      | 13          |
| 17                  | 146.7, C                   |                                               |                                  |                                          |             |
| 18                  | 18.4, $\text{CH}_3$        | 0.87, s                                       |                                  | 8, 13, 14, 15                            | 9, 15b      |
| 19                  | 24.7, $\text{CH}_3$        | 1.39, s                                       |                                  | 1, 5, 9, 10                              | 4, 9, 11    |
| 20                  | 133.0, C                   |                                               |                                  |                                          |             |
| 21                  | 174.1, C                   |                                               |                                  |                                          |             |
| 22                  | 29.8, $\text{CH}_2$        | a: 2.55<br>b: 2.38                            | 22b, 23<br>22a, 23               | 17, 20, 21, 23, 24<br>17, 20, 21, 23, 24 |             |
| 23                  | 29.2, $\text{CH}_2$        | 2.12                                          | 22a, 22b, 24                     | 22, 24, 25                               |             |
| 24                  | 124.2, CH                  | 5.14, br t (6.9)                              | 23, 26, 27                       | 23, 26, 27                               | 26          |
| 25                  | 133.4, C                   |                                               |                                  |                                          |             |
| 26                  | 25.9, $\text{CH}_3$        | 1.67, br s                                    | 24                               | 24, 25, 27                               | 24          |
| 27                  | 17.9, $\text{CH}_3$        | 1.61, br s                                    | 24                               | 24, 25, 26                               |             |
| 28                  | 13.2, $\text{CH}_3$        | 1.10, d (6.3)                                 | 4                                | 3, 4, 5                                  | 5, 6        |
| 30                  | 22.4, $\text{CH}_3$        | 1.52, s                                       |                                  | 7, 8, 9, 14                              | 5, 13, 15a  |
| 6- $\text{COCH}_3$  | 170.8, C                   |                                               |                                  |                                          |             |
| 6- $\text{COCH}_3$  | 20.7, $\text{CH}_3$        | 2.08, s                                       |                                  | 6- $\text{COCH}_3$                       |             |
| 16- $\text{COCH}_3$ | 172.4, C                   |                                               |                                  |                                          |             |
| 16- $\text{COCH}_3$ | 20.7, $\text{CH}_3$        | 1.96, s                                       |                                  | 16- $\text{COCH}_3$                      |             |

<sup>a</sup>The indiscernible signals from overlap or the complex multiplicity are reported without designating multiplicity.

**Table S50** NMR data for **59** ( $^1\text{H}$  for 400 MHz and  $^{13}\text{C}$  for 100 MHz in  $\text{CD}_3\text{OD}$ ).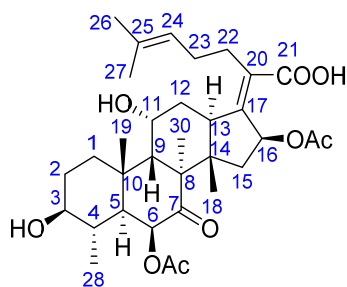**59**

| Position            | $\delta_{\text{C}}$ , type | $\delta_{\text{H}}$ ( $J$ in Hz) <sup>a</sup> | $^1\text{H}$ - $^1\text{H}$ COSY | HMBC                                | ROESY    |
|---------------------|----------------------------|-----------------------------------------------|----------------------------------|-------------------------------------|----------|
| 1                   | 36.9, $\text{CH}_2$        | a: 1.99<br>b: 1.84                            | 1b, 2a, 2b<br>1a, 2a, 2b         | 2, 3, 10                            |          |
| 2                   | 32.5, $\text{CH}_2$        | a: 1.88<br>b: 1.66                            | 1a, 1b, 2b, 3<br>1a, 1b, 2a, 3   | 3, 4                                |          |
| 3                   | 77.3, CH                   | 3.07                                          | 2a, 2b, 4                        | 1                                   | 28       |
| 4                   | 47.5, CH                   | 1.75                                          | 3, 5, 28                         | 5, 6                                | 19       |
| 5                   | 36.4, CH                   | 1.73                                          | 4, 6                             | 6                                   | 28, 30   |
| 6                   | 75.1, CH                   | 5.24, br s                                    | 5                                | 4, 7, 8, 10, 6- $\text{COCH}_3$     | 28       |
| 7                   | 212.5, C                   |                                               |                                  |                                     |          |
| 8                   | 54.7, C                    |                                               |                                  |                                     |          |
| 9                   | 47.3, CH                   | 2.31, br s                                    | 11                               | 7, 8, 10, 11, 14, 19, 30            | 18, 19   |
| 10                  | 37.5, C                    |                                               |                                  |                                     |          |
| 11                  | 67.8, CH                   | 4.43, br s                                    | 9, 12a, 12b                      | 8, 9, 10, 13                        | 19       |
| 12                  | 36.9, $\text{CH}_2$        | a: 2.34<br>b: 1.92                            | 11, 12b, 13<br>11, 12a, 13       | 14<br>13                            |          |
| 13                  | 45.0, CH                   | 3.09                                          | 12a, 12b                         | 12, 14, 17, 18, 20                  | 16, 30   |
| 14                  | 48.2, C                    |                                               |                                  |                                     |          |
| 15                  | 41.5, $\text{CH}_2$        | a: 2.28<br>b: 1.71                            | 15b, 16<br>15a, 16               | 8, 14, 18<br>13, 14, 16, 17         |          |
| 16                  | 75.4, CH                   | 5.81, br d (8.3)                              | 15a, 15b                         | 14, 15, 17, 20, 16- $\text{COCH}_3$ | 13       |
| 17                  | 146.7, C                   |                                               |                                  |                                     |          |
| 18                  | 18.3, $\text{CH}_3$        | 0.87, s                                       |                                  | 8, 13, 14, 15                       | 9        |
| 19                  | 25.1, $\text{CH}_3$        | 1.29, s                                       |                                  | 1, 5, 9, 10                         | 4, 9, 11 |
| 20                  | 133.0, C                   |                                               |                                  |                                     |          |
| 21                  | 174.2, C                   |                                               |                                  |                                     |          |
| 22                  | 29.8, $\text{CH}_2$        | a: 2.55<br>b: 2.36                            | 22b, 23<br>22a, 23               | 17, 20, 21, 23<br>17, 20, 21, 23    |          |
| 23                  | 29.2, $\text{CH}_2$        | 2.10                                          | 22a, 22b, 24                     | 22, 24, 25                          |          |
| 24                  | 124.3, CH                  | 5.13, br t (7.2)                              | 23, 26, 27                       | 23, 26, 27                          | 26       |
| 25                  | 133.4, C                   |                                               |                                  |                                     |          |
| 26                  | 25.9, $\text{CH}_3$        | 1.67, br s                                    | 24                               | 24, 25, 27                          | 24       |
| 27                  | 17.9, $\text{CH}_3$        | 1.61, br s                                    | 24                               | 24, 25, 26                          |          |
| 28                  | 15.7, $\text{CH}_3$        | 1.03, d (4.6)                                 | 4                                | 3, 4, 5                             | 3, 5, 6  |
| 30                  | 22.7, $\text{CH}_3$        | 1.51, s                                       |                                  | 7, 8, 9, 14                         | 5, 13    |
| 6- $\text{COCH}_3$  | 170.9, C                   |                                               |                                  |                                     |          |
| 6- $\text{COCH}_3$  | 20.8, $\text{CH}_3$        | 2.05, s                                       |                                  | 6- $\text{COCH}_3$                  |          |
| 16- $\text{COCH}_3$ | 172.5, C                   |                                               |                                  |                                     |          |
| 16- $\text{COCH}_3$ | 20.7, $\text{CH}_3$        | 1.95, s                                       |                                  | 16- $\text{COCH}_3$                 |          |

<sup>a</sup>The indiscernible signals from overlap or the complex multiplicity are reported without designating multiplicity.

**Table S51** NMR data for **60** ( $^1\text{H}$  for 600 MHz and  $^{13}\text{C}$  for 150 MHz in  $\text{CDCl}_3$ ).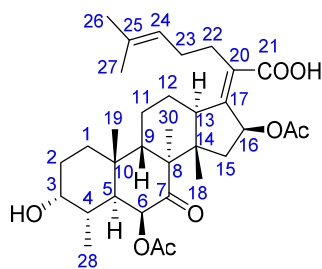**60**

| Position             | $\delta_{\text{C}}$ , type | $\delta_{\text{H}}$ ( $J$ in Hz) <sup>a</sup> | $^1\text{H}$ - $^1\text{H}$ COSY       | HMBC                                     | ROESY        |
|----------------------|----------------------------|-----------------------------------------------|----------------------------------------|------------------------------------------|--------------|
| 1                    | 29.7, CH <sub>2</sub>      | a: 1.75<br>b: 1.23                            | 1b, 2a, 2b<br>1a, 2a, 2b               | 2, 10, 19<br>3, 5, 10                    |              |
| 2                    | 29.5, CH <sub>2</sub>      | a: 1.83<br>b: 1.69                            | 1a, 1b, 2b, 3<br>1a, 1b, 2a, 3         | 1<br>3, 4, 10                            |              |
| 3                    | 71.0, CH                   | 3.84, br s                                    | 2a, 2b, 4                              | 1, 2, 5, 28                              | 28           |
| 4                    | 32.3, CH                   | 1.99                                          | 3, 5, 28                               | 5, 28                                    | 19           |
| 5                    | 39.3, CH                   | 2.26                                          | 4, 6                                   | 1, 3, 4, 7, 10, 19                       | 28, 30       |
| 6                    | 74.5, CH                   | 5.14, br s                                    | 5                                      | 4, 5, 7, 8, 10, 6-COCH <sub>3</sub>      | 28           |
| 7                    | 210.2, C                   |                                               |                                        |                                          |              |
| 8                    | 52.8, C                    |                                               |                                        |                                          |              |
| 9                    | 41.9, CH                   | 2.40                                          | 11a, 11b                               | 1, 7, 8, 10, 11, 12, 19, 30              | 12b, 18, 19  |
| 10                   | 35.8, C                    |                                               |                                        |                                          |              |
| 11                   | 22.6, CH <sub>2</sub>      | a: 1.77<br>b: 1.40, qd (13.1, 3.4)            | 9, 11b, 12a, 12b<br>9, 11a, 12a, 12b   | 9                                        | 13           |
| 12                   | 26.1, CH <sub>2</sub>      | a: 2.29<br>b: 1.69                            | 11a, 11b, 12b, 13<br>11a, 11b, 12a, 13 | 13                                       | 9            |
| 13                   | 49.1, CH                   | 2.52, br d (11.9)                             | 12a, 12b                               | 12, 14, 17, 18, 20                       | 11b, 16, 30  |
| 14                   | 46.8, C                    |                                               |                                        |                                          |              |
| 15                   | 40.4, CH <sub>2</sub>      | a: 2.24<br>b: 1.83, br d (14.5)               | 15b, 16<br>15a, 16                     | 8, 14, 18<br>13, 14, 16, 17, 18          | 30<br>18     |
| 16                   | 73.6, CH                   | 5.81, br d (8.5)                              | 15a, 15b                               | 13, 14, 17, 20, 16-COCH <sub>3</sub>     | 13           |
| 17                   | 148.1, C                   |                                               |                                        |                                          |              |
| 18                   | 17.9, CH <sub>3</sub>      | 0.86, s                                       |                                        | 8, 13, 14, 15                            | 9, 15b       |
| 19                   | 22.7, CH <sub>3</sub>      | 1.18, s                                       |                                        | 1, 5, 9, 10                              | 4, 9         |
| 20                   | 130.2, C                   |                                               |                                        |                                          |              |
| 21                   | 174.6, C                   |                                               |                                        |                                          |              |
| 22                   | 28.4, CH <sub>2</sub>      | a: 2.47<br>b: 2.40                            | 22b, 23a, 23b<br>22a, 23a, 23b         | 17, 20, 21, 23, 24<br>17, 20, 21, 23, 24 | 24<br>24     |
| 23                   | 28.3, CH <sub>2</sub>      | a: 2.09<br>b: 2.01                            | 22a, 22b, 23b, 24<br>22a, 22b, 23a, 24 | 22, 24, 25<br>22, 24, 25                 |              |
| 24                   | 122.8, CH                  | 5.06, br t (7.1)                              | 23a, 23b, 26, 27                       | 23, 26, 27                               | 22a, 22b, 26 |
| 25                   | 132.6, C                   |                                               |                                        |                                          |              |
| 26                   | 25.6, CH <sub>3</sub>      | 1.65, br s                                    | 24                                     | 24, 25, 27                               | 24           |
| 27                   | 17.6, CH <sub>3</sub>      | 1.57, br s                                    | 24                                     | 24, 25, 26                               |              |
| 28                   | 15.3, CH <sub>3</sub>      | 0.99, d (6.8)                                 | 4                                      | 3, 4, 5                                  | 3, 5, 6      |
| 30                   | 17.9, CH <sub>3</sub>      | 1.30, s                                       |                                        | 7, 8, 9, 14                              | 5, 13, 15a   |
| 6-COCH <sub>3</sub>  | 169.1, C                   |                                               |                                        |                                          |              |
| 6-COCH <sub>3</sub>  | 20.8, CH <sub>3</sub>      | 2.03, s                                       |                                        | 6-COCH <sub>3</sub>                      |              |
| 16-COCH <sub>3</sub> | 170.2, C                   |                                               |                                        |                                          |              |
| 16-COCH <sub>3</sub> | 20.4, CH <sub>3</sub>      | 1.89, s                                       |                                        | 16-COCH <sub>3</sub>                     |              |

<sup>a</sup>The indiscernible signals from overlap or the complex multiplicity are reported without designating multiplicity.

**Table S52** NMR data for **61** ( $^1\text{H}$  for 400 MHz and  $^{13}\text{C}$  for 100 MHz in  $\text{CDCl}_3$ ).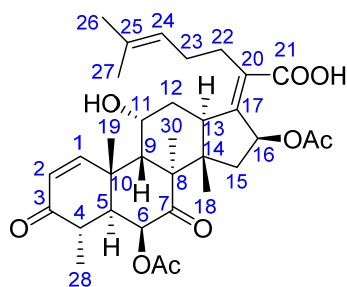**61**

| Position                     | $\delta_{\text{C}}$ , type | $\delta_{\text{H}}$ ( $J$ in Hz) <sup>a</sup>   | $^1\text{H}$ - $^1\text{H}$ COSY | HMBC                                         | ROESY       |
|------------------------------|----------------------------|-------------------------------------------------|----------------------------------|----------------------------------------------|-------------|
| 1                            | 160.6, CH                  | 8.19, d (10.2)                                  | 2                                | 3, 5, 9, 10                                  | 11          |
| 2                            | 126.3, CH                  | 5.81, d (10.2)                                  | 1                                | 4, 10                                        |             |
| 3                            | 201.7, C                   |                                                 |                                  |                                              |             |
| 4                            | 40.3, CH                   | 2.74, dq (13.2, 6.6)                            | 5, 28                            | 3, 5, 28                                     | 6, 19       |
| 5                            | 46.5, CH                   | 2.42                                            | 4, 6                             | 1, 3, 4, 10, 19, 28                          | 28, 30      |
| 6                            | 73.6, CH                   | 5.23, br s                                      | 5                                | 4, 5, 7, 8, 10, 6- <u>COCH</u> <sub>3</sub>  | 4, 28       |
| 7                            | 208.8, C                   |                                                 |                                  |                                              |             |
| 8                            | 53.3, C                    |                                                 |                                  |                                              |             |
| 9                            | 45.3, CH                   | 2.46                                            | 11                               | 1, 7, 8, 10, 11, 14, 19, 30                  | 12b, 18, 19 |
| 10                           | 38.7, C                    |                                                 |                                  |                                              |             |
| 11                           | 67.2, CH                   | 4.69, br s                                      | 9, 12a, 12b                      | 8, 10, 13                                    | 1, 19       |
| 12                           | 35.7, CH <sub>2</sub>      | a: 2.39<br>b: 2.06                              | 11, 12b, 13<br>11, 12a, 13       | 9, 11<br>13                                  | 9, 18       |
| 13                           | 43.9, CH                   | 3.12, br d (12.1)                               | 12a, 12b                         | 11, 12, 14, 17, 18, 20                       | 16, 30      |
| 14                           | 46.7, C                    |                                                 |                                  |                                              |             |
| 15                           | 40.5, CH <sub>2</sub>      | a: 2.31, dd (15.0, 8.9)<br>b: 1.91, br d (15.3) | 15b, 16<br>15a, 16               | 8, 14, 18<br>13, 14, 16, 17, 18              | 30<br>18    |
| 16                           | 73.8, CH                   | 5.91, br d (8.3)                                | 15a, 15b                         | 13, 14, 17, 20, 16- <u>COCH</u> <sub>3</sub> | 13          |
| 17                           | 148.2, C                   |                                                 |                                  |                                              |             |
| 18                           | 17.8, CH <sub>3</sub>      | 0.88, s                                         |                                  | 8, 13, 14, 15                                | 9, 12b, 15b |
| 19                           | 27.8, CH <sub>3</sub>      | 1.47, s                                         |                                  | 1, 5, 9, 10                                  | 4, 9, 11    |
| 20                           | 130.4, C                   |                                                 |                                  |                                              |             |
| 21                           | 174.1, C                   |                                                 |                                  |                                              |             |
| 22                           | 28.7, CH <sub>2</sub>      | 2.44                                            | 23a, 23b                         | 17, 20, 21, 24                               | 24          |
| 23                           | 28.4, CH <sub>2</sub>      | a: 2.15<br>b: 2.04                              | 22, 23b, 24<br>22, 23a, 24       | 20, 22, 24, 25<br>20, 22, 24, 25             |             |
| 24                           | 122.8, CH                  | 5.09, br t (7.0)                                | 23a, 23b, 26, 27                 | 23, 26, 27                                   | 22, 26      |
| 25                           | 132.9, C                   |                                                 |                                  |                                              |             |
| 26                           | 25.7, CH <sub>3</sub>      | 1.66, br s                                      | 24                               | 24, 25, 27                                   | 24          |
| 27                           | 17.8, CH <sub>3</sub>      | 1.58, br s                                      | 24                               | 24, 25, 26                                   |             |
| 28                           | 13.0, CH <sub>3</sub>      | 1.24, d (6.7)                                   | 4                                | 3, 4, 5                                      | 5, 6        |
| 30                           | 22.3, CH <sub>3</sub>      | 1.38, s                                         |                                  | 7, 8, 9, 14,                                 | 5, 13, 15a  |
| 6- <u>COCH</u> <sub>3</sub>  | 168.9, C                   |                                                 |                                  |                                              |             |
| 6- <u>COCH</u> <sub>3</sub>  | 20.6, CH <sub>3</sub>      | 2.08, s                                         |                                  | 6- <u>COCH</u> <sub>3</sub>                  |             |
| 16- <u>COCH</u> <sub>3</sub> | 170.5, C                   |                                                 |                                  |                                              |             |
| 16- <u>COCH</u> <sub>3</sub> | 20.4, CH <sub>3</sub>      | 1.93, s                                         |                                  | 16- <u>COCH</u> <sub>3</sub>                 |             |

<sup>a</sup>The indiscernible signals from overlap or the complex multiplicity are reported without designating multiplicity.

**Table S53** NMR data for **62** ( $^1\text{H}$  for 600 MHz and  $^{13}\text{C}$  for 150 MHz in  $\text{CD}_3\text{OD}$ ).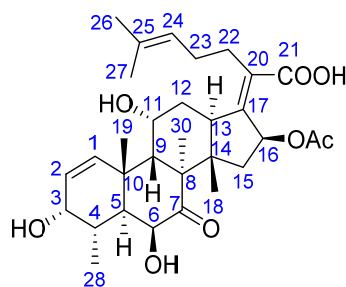**62**

| Position             | $\delta_{\text{C}}$ , type | $\delta_{\text{H}}$ ( $J$ in Hz) <sup>a</sup>   | $^1\text{H}$ - $^1\text{H}$ COSY | HMBC                        | ROESY        |
|----------------------|----------------------------|-------------------------------------------------|----------------------------------|-----------------------------|--------------|
| 1                    | 143.7, CH                  | 6.79, d (10.2)                                  | 2                                | 3, 5, 10                    | 11, 19       |
| 2                    | 126.0, CH                  | 5.49, dd (10.2, 4.3)                            | 1, 3                             | 4, 10                       |              |
| 3                    | 69.4, CH                   | 3.97, t (4.4)                                   | 2, 4                             | 1, 2, 5                     | 28           |
| 4                    | 32.3, CH                   | 2.46                                            | 3, 5, 28                         | 28                          | 19           |
| 5                    | 41.1, CH                   | 2.08, dd (11.2, 1.5)                            | 4, 6                             | 1, 3, 4, 10, 19             | 28, 30       |
| 6                    | 74.6, CH                   | 3.91, d (1.5)                                   | 5                                | 4, 5, 7, 8, 10              | 28           |
| 7                    | 217.9, C                   |                                                 |                                  |                             |              |
| 8                    | 54.3, C                    |                                                 |                                  |                             |              |
| 9                    | 46.7, CH                   | 2.43, br s                                      | 11                               | 1, 7, 8, 10, 11, 14, 19, 30 | 12b, 18, 19  |
| 10                   | 39.4, C                    |                                                 |                                  |                             |              |
| 11                   | 67.9, CH                   | 4.53, br s                                      | 9, 12a, 12b                      | 8, 13                       | 1, 19        |
| 12                   | 36.8, CH <sub>2</sub>      | a: 2.37<br>b: 1.91, br t (13.0)                 | 11, 12b, 13<br>11, 12a, 13       | 13                          | 9, 18        |
| 13                   | 44.7, CH                   | 3.10, br d (11.4)                               | 12a, 12b                         |                             | 15a, 30      |
| 14                   | 47.9, C                    |                                                 |                                  |                             |              |
| 15                   | 42.1, CH <sub>2</sub>      | a: 2.27, dd (15.3, 8.7)<br>b: 1.82, br d (14.7) | 15b, 16<br>15a, 16               | 14, 18<br>13, 14, 16, 18    | 13, 30<br>18 |
| 16                   | 75.7, CH                   | 5.81, br d (8.2)                                | 15a, 15b                         | 14                          |              |
| 17                   | #                          |                                                 |                                  |                             |              |
| 18                   | 18.6, CH <sub>3</sub>      | 0.93, s                                         |                                  | 8, 13, 14, 15               | 9, 12b, 15b  |
| 19                   | 29.6, CH <sub>3</sub>      | 1.35, s                                         |                                  | 1, 5, 9, 10                 | 1, 4, 9, 11  |
| 20                   | #                          |                                                 |                                  |                             |              |
| 21                   | #                          |                                                 |                                  |                             |              |
| 22                   | 30.2, CH <sub>2</sub>      | a: 2.56<br>b: 2.37                              | 22b, 23<br>22a, 23               |                             |              |
| 23                   | 29.3, CH <sub>2</sub>      | 2.13                                            | 22a, 22b, 24                     |                             |              |
| 24                   | 124.6, CH                  | 5.15, br t (6.1)                                | 23, 26, 27                       | 23, 26, 27                  | 26           |
| 25                   | 133.1, C                   |                                                 |                                  |                             |              |
| 26                   | 25.9, CH <sub>3</sub>      | 1.67, br s                                      | 24                               | 24, 25, 27                  | 24           |
| 27                   | 17.9, CH <sub>3</sub>      | 1.61, br s                                      | 24                               | 24, 25, 26                  |              |
| 28                   | 14.2, CH <sub>3</sub>      | 1.06, d (6.9)                                   | 4                                | 3, 4, 5                     | 3, 5, 6      |
| 30                   | 22.5, CH <sub>3</sub>      | 1.37, s                                         |                                  | 7, 8, 9, 14                 | 5, 13, 15a   |
| 16-COCH <sub>3</sub> | 172.8, C                   |                                                 |                                  |                             |              |
| 16-COCH <sub>3</sub> | 20.9, CH <sub>3</sub>      | 1.97, s                                         |                                  | 16-COCH <sub>3</sub>        |              |

<sup>a</sup>The indiscernible signals from overlap or the complex multiplicity are reported without designating multiplicity.

#Data are not observed in NMR spectra.

**Table S54** NMR data for **63** ( $^1\text{H}$  for 600 MHz and  $^{13}\text{C}$  for 150 MHz in pyridine- $d_5$ ).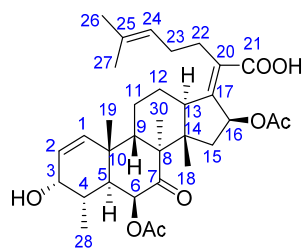**63**

| Position                    | $\delta_{\text{C}}$ , type | $\delta_{\text{H}}$ (J in Hz) <sup>a</sup> | $^1\text{H}$ - $^1\text{H}$ COSY       | HMBC                                        | ROESY           | $\delta_{\text{C}}$ , type <sup>b</sup> | $\delta_{\text{H}}$ (J in Hz) <sup>a,b</sup> |
|-----------------------------|----------------------------|--------------------------------------------|----------------------------------------|---------------------------------------------|-----------------|-----------------------------------------|----------------------------------------------|
| 1                           | 138.2, CH                  | 6.19, d (10.0)                             | 2                                      | 3, 5, 10                                    | 11a, 11b, 19    | 140.2, CH                               | 6.18, d (10.0)                               |
| 2                           | 129.7, CH                  | 5.97, dd (9.7, 3.5)                        | 1, 3                                   | 4, 10                                       |                 | 128.8, CH                               | 5.58, dd (10.1, 4.0)                         |
| 3                           | 67.8, CH                   | 4.33, br s                                 | 2, 4                                   | 1, 2, 5                                     | 28              | 69.0, CH                                | 4.01, t (4.3)                                |
| 4                           | 31.8, CH                   | 2.50                                       | 3, 5, 28                               | 3, 5, 10, 28                                | 19              | 32.3, CH                                | 2.36                                         |
| 5                           | 41.1, CH                   | 2.51                                       | 4, 6                                   | 1, 3, 4, 7, 9, 10, 19                       | 30              | 41.8, CH                                | 2.10                                         |
| 6                           | 74.8, CH                   | 5.74, br s                                 | 5                                      | 4, 5, 7, 8, 10, 6- <u>COCH<sub>3</sub></u>  | 28              | 75.5, CH                                | 5.19, br s                                   |
| 7                           | 210.7, C                   |                                            |                                        |                                             |                 | 212.0, C                                |                                              |
| 8                           | 53.0, C                    |                                            |                                        |                                             |                 | 54.0, C                                 |                                              |
| 9                           | 42.1, CH                   | 2.62                                       | 11a, 11b                               | 1, 7, 8, 10, 11, 19, 30                     | 18, 19          | 43.2, CH                                | 2.50                                         |
| 10                          | 38.0, C                    |                                            |                                        |                                             |                 | 38.8, C                                 |                                              |
| 11                          | 24.0, CH <sub>2</sub>      | a: 1.90<br>b: 1.46                         | 9, 11b, 12a, 12b<br>9, 11a, 12a, 12b   | 8, 13                                       | 1<br>1, 30      | 24.8, CH <sub>2</sub>                   | a: 1.96<br>b: 1.56                           |
| 12                          | 26.5, CH <sub>2</sub>      | a: 2.43<br>b: 1.81, br q (13.6)            | 11a, 11b, 12b, 13<br>11a, 11b, 12a, 13 | 14<br>11, 13                                | 18              | 27.4, CH <sub>2</sub>                   | a: 2.38<br>b: 1.77                           |
| 13                          | 49.1, CH                   | 2.60                                       | 12a, 12b                               | 12, 14, 17, 18                              | 16, 30          | 50.0, CH                                | 2.65, br d (11.4)                            |
| 14                          | 47.0, C                    |                                            |                                        |                                             |                 | 47.8, C                                 |                                              |
| 15                          | 41.3, CH <sub>2</sub>      | a: 2.35, dd (14.2, 8.8)<br>b: 2.17         | 15b, 16<br>15a, 16                     | 8, 14, 18<br>13, 14, 16, 17, 18             | 30<br>18        | 41.8, CH <sub>2</sub>                   | a: 2.23, dd (14.8, 9.0)<br>b: 1.73           |
| 16                          | 74.2, CH                   | 6.43, br d (8.4)                           | 15a, 15b                               | 13, 14, 17, 20, 16- <u>COCH<sub>3</sub></u> | 13              | 75.2, CH                                | 5.77, br d (8.3)                             |
| 17                          | 144.6, C                   |                                            |                                        |                                             |                 | 146.1, C                                |                                              |
| 18                          | 18.1, CH <sub>3</sub>      | 1.13, s                                    |                                        | 8, 13, 14, 15                               | 9, 12b, 15b     | 18.4, CH <sub>3</sub>                   | 0.87, s                                      |
| 19                          | 28.3, CH <sub>3</sub>      | 1.42, s                                    |                                        | 1, 5, 9, 10                                 | 1, 4, 9         | 28.4, CH <sub>3</sub>                   | 1.30, s                                      |
| 20                          | 133.1, C                   |                                            |                                        |                                             |                 | 132.8, C                                |                                              |
| 21                          | 173.0, C                   |                                            |                                        |                                             |                 | #                                       |                                              |
| 22                          | 29.5, CH <sub>2</sub>      | a: 2.94<br>b: 2.84                         | 22b, 23a, 23b<br>22a, 23a, 23b         | 17, 20, 21, 23, 24<br>17, 20, 21, 23, 24    | 24<br>24        | 29.7, CH <sub>2</sub>                   | a: 2.57<br>b: 2.38                           |
| 23                          | 29.1, CH <sub>2</sub>      | a: 2.57<br>b: 2.44                         | 22a, 22b, 23b, 24<br>22a, 22b, 23a, 24 | 22, 24, 25<br>22, 24, 25                    |                 | 29.1, CH <sub>2</sub>                   | 2.11                                         |
| 24                          | 124.3, CH                  | 5.41, br t (6.4)                           | 23a, 23b, 26, 27                       | 23, 26, 27                                  | 22a, 22b, 26    | 124.3, CH                               | 5.14, br t (7.3)                             |
| 25                          | 132.2, C                   |                                            |                                        |                                             |                 | 133.4, C                                |                                              |
| 26                          | 25.8, CH <sub>3</sub>      | 1.72, br s                                 | 24                                     | 24, 25, 27                                  | 24              | 25.9, CH <sub>3</sub>                   | 1.68, br s                                   |
| 27                          | 17.8, CH <sub>3</sub>      | 1.69, br s                                 | 24                                     | 24, 25, 26                                  |                 | 17.8, CH <sub>3</sub>                   | 1.61, br s                                   |
| 28                          | 14.5, CH <sub>3</sub>      | 1.37, d (4.2)                              | 4                                      | 3, 4, 5                                     | 3, 6            | 14.0, CH <sub>3</sub>                   | 1.04, d (6.8)                                |
| 30                          | 18.2, CH <sub>3</sub>      | 1.13, s                                    |                                        | 7, 8, 9, 14                                 | 5, 11b, 13, 15a | 18.6, CH <sub>3</sub>                   | 1.22, s                                      |
| 6- <u>COCH<sub>3</sub></u>  | 169.4, C                   |                                            |                                        |                                             |                 | 170.9, C                                |                                              |
| 6- <u>COCH<sub>3</sub></u>  | 20.7, CH <sub>3</sub>      | 2.13, s                                    |                                        | 6- <u>COCH<sub>3</sub></u>                  |                 | 20.7, CH <sub>3</sub>                   | 2.07, s                                      |
| 16- <u>COCH<sub>3</sub></u> | 170.4, C                   |                                            |                                        |                                             |                 | 172.5, C                                |                                              |
| 16- <u>COCH<sub>3</sub></u> | 20.6, CH <sub>3</sub>      | 1.91, s                                    |                                        | 16- <u>COCH<sub>3</sub></u>                 |                 | 20.6, C                                 | 1.95, s                                      |

<sup>a</sup>The indiscernible signals from overlap or the complex multiplicity are reported without designating multiplicity.<sup>b</sup>The data were measured in CD<sub>3</sub>OD ( $^1\text{H}$  NMR for 400 MHz and  $^{13}\text{C}$  NMR for 100 MHz).

#The data is not observed in NMR spectra.



**Table S55** NMR data for **64** ( $^1\text{H}$  for 600 MHz and  $^{13}\text{C}$  for 150 MHz in  $\text{CD}_3\text{OD}$ ).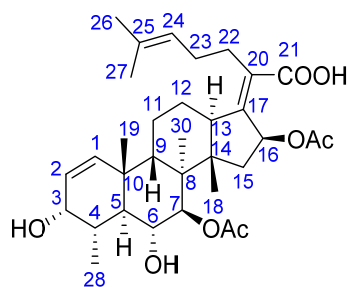**64**

| Position                     | $\delta_{\text{C}}$ , type | $\delta_{\text{H}}$ ( $J$ in Hz) <sup>a</sup>   | $^1\text{H}$ - $^1\text{H}$ COSY       | HMBC                                         | ROESY                                    |
|------------------------------|----------------------------|-------------------------------------------------|----------------------------------------|----------------------------------------------|------------------------------------------|
| 1                            | 141.3, CH                  | 6.09, d (10.2)                                  | 2                                      | 3, 5, 10, 19                                 | 11a, 11b, 19                             |
| 2                            | 127.2, CH                  | 5.59, dd (10.2, 4.7)                            | 1, 3                                   | 3, 4, 10                                     |                                          |
| 3                            | 70.1, CH                   | 3.78, t (4.0)                                   | 2, 4                                   | 1, 2, 5                                      | 28                                       |
| 4                            | 36.4, CH                   | 2.07                                            | 3, 5, 28                               | 5                                            | 19                                       |
| 5                            | 42.0, CH                   | 2.09                                            | 4, 6                                   | 1, 3, 4, 6, 10, 19                           | 28, 30                                   |
| 6                            | 75.6, CH                   | 3.52, br d (9.8)                                | 5, 7                                   | 4, 5, 7, 8                                   | 19                                       |
| 7                            | 84.5, CH                   | 4.81, br s                                      | 6                                      | 6, 8, 9, 14, 30, 7- <u>COCH</u> <sub>3</sub> | 30                                       |
| 8                            | 43.8, C                    |                                                 |                                        |                                              |                                          |
| 9                            | 42.8, CH                   | 2.22, dd (13.4, 3.7)                            | 11a, 11b                               | 1, 5, 8, 10, 11, 14, 19, 30                  | 12b, 18, 19                              |
| 10                           | 39.6, C                    |                                                 |                                        |                                              |                                          |
| 11                           | 26.2, CH <sub>2</sub>      | a: 2.00<br>b: 1.39, qd (13.0, 4.4)              | 9, 11b, 12a, 12b<br>9, 11ba 12a, 12b   | 9, 12                                        | 1<br>1, 13, 30                           |
| 12                           | 27.2, CH <sub>2</sub>      | a: 2.29<br>b: 1.69                              | 11a, 11b, 12b, 13<br>11a, 11b, 12a, 13 | 11, 13                                       | 9, 18                                    |
| 13                           | 50.2, CH                   | 2.63, br d (11.2)                               | 12a, 12b                               | 12, 14, 17, 18, 20                           | 11b, 15a, 16, 30                         |
| 14                           | 49.5, C                    |                                                 |                                        |                                              |                                          |
| 15                           | 41.0, CH <sub>2</sub>      | a: 2.18, dd (14.4, 9.2)<br>b: 1.20, br d (14.4) | 15b, 16<br>15a, 16                     | 8, 14, 18,<br>13, 16, 17, 18                 | 13<br>18                                 |
| 16                           | 75.5, CH                   | 5.78, br d (8.6)                                | 15a, 15b                               | 14, 17, 20, 16- <u>COCH</u> <sub>3</sub>     | 13                                       |
| 17                           | 146.9, C                   |                                                 |                                        |                                              |                                          |
| 18                           | 21.6, CH <sub>3</sub>      | 1.03, s                                         |                                        | 8, 13, 14, 15                                | 9, 12b, 15b, 7- <u>COCH</u> <sub>3</sub> |
| 19                           | 27.7, CH <sub>3</sub>      | 1.14, s                                         |                                        | 1, 5, 9, 10                                  | 1, 4, 6, 9                               |
| 20                           | 133.6, C                   |                                                 |                                        |                                              |                                          |
| 21                           | 174.5, C                   |                                                 |                                        |                                              |                                          |
| 22                           | 29.8, CH <sub>2</sub>      | a: 2.54, dt (13.2, 7.6)<br>b: 2.35              | 22b, 23<br>22a, 23                     | 17, 20, 21, 23, 24<br>17, 20, 21, 23, 24     | 24<br>24                                 |
| 23                           | 29.0, CH <sub>2</sub>      | 2.08                                            | 22a, 22b, 24                           | 22, 24, 25                                   |                                          |
| 24                           | 124.4, CH                  | 5.12, br t (7.2)                                | 23, 26, 27                             | 23, 26, 27                                   | 22a, 22b, 26                             |
| 25                           | 133.3, C                   |                                                 |                                        |                                              |                                          |
| 26                           | 25.9, CH <sub>3</sub>      | 1.67, br s                                      | 24                                     | 24, 25, 27                                   | 24                                       |
| 27                           | 17.8, CH <sub>3</sub>      | 1.60, br s                                      | 24                                     | 24, 25, 26                                   |                                          |
| 28                           | 16.5, CH <sub>3</sub>      | 1.13, d (5.8)                                   | 4                                      | 3, 4, 5                                      | 3, 5                                     |
| 30                           | 17.3, CH <sub>3</sub>      | 1.18, s                                         |                                        | 7, 8, 9, 14                                  | 5, 7, 11b, 13                            |
| 7- <u>COCH</u> <sub>3</sub>  | 171.9, C                   |                                                 |                                        |                                              |                                          |
| 7- <u>COCH</u> <sub>3</sub>  | 22.0, CH <sub>3</sub>      | 2.03, s                                         |                                        | 7- <u>COCH</u> <sub>3</sub>                  | 18                                       |
| 16- <u>COCH</u> <sub>3</sub> | 172.6, C                   |                                                 |                                        |                                              |                                          |
| 16- <u>COCH</u> <sub>3</sub> | 20.6, CH <sub>3</sub>      | 1.95, s                                         |                                        | 16- <u>COCH</u> <sub>3</sub>                 |                                          |

<sup>a</sup>The indiscernible signals from overlap or the complex multiplicity are reported without designating multiplicity

**Table S56** NMR data for **65** ( $^1\text{H}$  for 600 MHz and  $^{13}\text{C}$  for 150 MHz in  $\text{CD}_3\text{OD}$ ).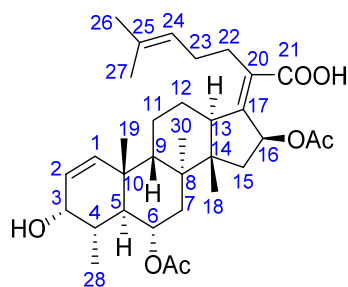**65**

| Position             | $\delta_{\text{C}}$ , type | $\delta_{\text{H}}$ ( $J$ in Hz) <sup>a</sup>      | $^1\text{H}$ - $^1\text{H}$ COSY       | HMBC                                     | ROESY            |
|----------------------|----------------------------|----------------------------------------------------|----------------------------------------|------------------------------------------|------------------|
| 1                    | 140.4, CH                  | 6.06, d (10.1)                                     | 2                                      | 3, 5, 9, 10, 19                          | 11a, 11b, 19     |
| 2                    | 127.6, CH                  | 5.62, dd (10.1, 4.8)                               | 1, 3                                   | 3, 4, 10                                 |                  |
| 3                    | 69.8, CH                   | 3.79, t (4.3)                                      | 2, 4                                   | 1, 2, 4, 5, 28                           | 28               |
| 4                    | 36.0, CH                   | 2.06                                               | 3, 5, 28                               | 5, 28                                    | 6, 19            |
| 5                    | 39.9, CH                   | 2.47, t (11.0)                                     | 4, 6                                   | 1, 3, 4, 6, 7, 9, 10, 19                 | 28, 30           |
| 6                    | 73.1, CH                   | 5.01, ddd (10.8, 7.3, 2.4)                         | 5, 7a, 7b                              | 4, 5, 8, 6-COCH <sub>3</sub>             | 4, 19, 28        |
| 7                    | 41.0, CH <sub>2</sub>      | a: 2.12, dd (14.9, 7.4)<br>b: 1.27, dd (14.9, 2.3) | 6, 7b<br>6, 7a                         | 5, 6, 8, 9, 14, 30<br>6, 8, 9, 14, 30    | 18               |
| 8                    | 40.0, C                    |                                                    |                                        |                                          |                  |
| 9                    | 47.7, CH                   | 1.76, dd (13.3, 3.1)                               | 11a, 11b                               | 1, 5, 10, 11, 19, 30                     | 18, 19           |
| 10                   | 39.3, C                    |                                                    |                                        |                                          |                  |
| 11                   | 26.1, CH <sub>2</sub>      | a: 1.92<br>b: 1.30, qd (13.0, 4.0)                 | 9, 11b, 12a, 12b<br>9, 11ba, 12a, 12b  | 9<br>8, 9, 12                            | 1<br>1, 13, 30   |
| 12                   | 27.8, CH <sub>2</sub>      | a: 2.30<br>b: 1.69                                 | 11a, 11b, 12b, 13<br>11a, 11b, 12a, 13 | 11, 13                                   | 18               |
| 13                   | 48.9, CH                   | 2.61, br d (11.5)                                  | 12a, 12b                               | 12, 14, 17, 18, 20                       | 11b, 15a, 16, 30 |
| 14                   | 49.4, C                    |                                                    |                                        |                                          |                  |
| 15                   | 40.1, CH <sub>2</sub>      | a: 2.06<br>b: 1.19, br d (14.6)                    | 15b, 16<br>15a, 16                     | 14, 16, 18<br>13, 16, 17, 18             | 13<br>18         |
| 16                   | 75.4, CH                   | 5.75, br d (8.6)                                   | 15a, 15b                               | 14, 15, 17, 20, 16-COCH <sub>3</sub>     | 13               |
| 17                   | 147.3, C                   |                                                    |                                        |                                          |                  |
| 18                   | 17.9, CH <sub>3</sub>      | 0.95, s                                            |                                        | 8, 13, 14, 15                            | 7a, 9, 12b, 15b  |
| 19                   | 28.6, CH <sub>3</sub>      | 1.04, s                                            |                                        | 1, 5, 9, 10                              | 1, 4, 6, 9       |
| 20                   | 132.5, C                   |                                                    |                                        |                                          |                  |
| 21                   | 174.4, C                   |                                                    |                                        |                                          |                  |
| 22                   | 29.7, CH <sub>2</sub>      | a: 2.55, dt (13.1, 7.6)<br>b: 2.36                 | 22b, 23<br>22a, 23                     | 17, 20, 21, 23, 24<br>17, 20, 21, 23, 24 | 24<br>24         |
| 23                   | 29.1, CH <sub>2</sub>      | 2.09                                               | 22a, 22b, 24                           | 22, 24, 25                               |                  |
| 24                   | 124.4, CH                  | 5.12, br t (7.3)                                   | 23, 26, 27                             | 23, 26, 27                               | 22a, 22b, 26     |
| 25                   | 133.3, C                   |                                                    |                                        |                                          |                  |
| 26                   | 25.9, CH <sub>3</sub>      | 1.67, br s                                         | 24                                     | 24, 25, 27                               | 24               |
| 27                   | 17.8, CH <sub>3</sub>      | 1.60, br s                                         | 24                                     | 24, 25, 26                               |                  |
| 28                   | 15.8, CH <sub>3</sub>      | 0.97, d (7.0)                                      | 4                                      | 3, 4, 5                                  | 3, 5, 6          |
| 30                   | 19.4, CH <sub>3</sub>      | 1.17, s                                            |                                        | 7, 8, 9, 14                              | 5, 11b, 13       |
| 6-COCH <sub>3</sub>  | 172.6, C                   |                                                    |                                        |                                          |                  |
| 6-COCH <sub>3</sub>  | 21.9, CH <sub>3</sub>      | 2.01, s                                            |                                        | 6-COCH <sub>3</sub>                      |                  |
| 16-COCH <sub>3</sub> | 172.6, C                   |                                                    |                                        |                                          |                  |
| 16-COCH <sub>3</sub> | 20.6, CH <sub>3</sub>      | 1.95, s                                            |                                        | 16-COCH <sub>3</sub>                     |                  |

<sup>a</sup>The indiscernible signals from overlap or the complex multiplicity are reported without designating multiplicity.

**Table S57** NMR data for **66** ( $^1\text{H}$  for 600 MHz and  $^{13}\text{C}$  for 150 MHz in  $\text{CD}_3\text{OD}$ ).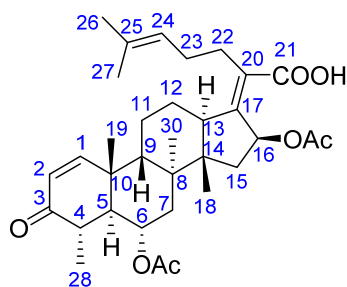**66**

| Position                    | $\delta_{\text{C}}$ , type | $\delta_{\text{H}}$ ( $J$ in Hz) <sup>a</sup> | $^1\text{H}$ - $^1\text{H}$ COSY       | HMBC                                     | ROESY           |
|-----------------------------|----------------------------|-----------------------------------------------|----------------------------------------|------------------------------------------|-----------------|
| 1                           | 160.4, CH                  | 7.46, d (9.3)                                 | 2                                      | 3, 5, 9, 10                              | 11a, 11b        |
| 2                           | 128.0, CH                  | 5.84, d (9.5)                                 | 1                                      | 3, 4, 10                                 |                 |
| 3                           | 204.5, C                   |                                               |                                        |                                          |                 |
| 4                           | 44.0, CH                   | 2.65                                          | 5, 28                                  | 3, 5, 6, 10, 28                          | 6, 19           |
| 5                           | 50.1, CH                   | 2.45, t (10.9)                                | 4, 6                                   | 1, 3, 4, 6, 7, 10, 19, 28                | 28, 30          |
| 6                           | 72.5, CH                   | 5.05                                          | 5, 7a, 7b                              | 4, 5, 7, 10, 6- <u>COCH<sub>3</sub></u>  | 4, 9, 19        |
| 7                           | 42.1, CH <sub>2</sub>      | a: 2.32<br>b: 1.27                            | 6, 7b<br>6, 7a                         | 6, 8, 14, 30<br>6, 8, 30                 | 18              |
| 8                           | 40.1, C                    |                                               |                                        |                                          |                 |
| 9                           | 45.9, CH                   | 1.81                                          | 11a, 11b                               | 1, 8, 11, 19, 30                         | 6, 18, 19       |
| 10                          | 40.9, C                    |                                               |                                        |                                          |                 |
| 11                          | 25.8, CH <sub>2</sub>      | a: 1.85<br>b: 1.53                            | 9, 11b, 12a, 12b<br>9, 11a, 12a, 12b   | 8<br>9, 12                               | 1<br>1, 30      |
| 12                          | 27.3, CH <sub>2</sub>      | a: 2.37<br>b: 1.76                            | 11a, 11b, 12b, 13<br>11a, 11b, 12a, 13 |                                          |                 |
| 13                          | 48.9, CH                   | 2.63                                          | 12a, 12b                               | 12, 14, 17, 18, 20                       | 16, 30          |
| 14                          | 49.3, C                    |                                               |                                        |                                          |                 |
| 15                          | 40.1, CH <sub>2</sub>      | a: 2.04<br>b: 1.24                            | 15b, 16<br>15a, 16                     | 8, 14, 18<br>8, 14, 16, 17, 18           | 30<br>18        |
| 16                          | 75.3, CH                   | 5.78, br d (7.1)                              | 15a, 15b                               | 14, 17, 20, 16- <u>COCH<sub>3</sub></u>  | 13              |
| 17                          | 146.6, C                   |                                               |                                        |                                          |                 |
| 18                          | 18.4, CH <sub>3</sub>      | 1.01, s                                       |                                        | 8, 13, 14, 15                            | 7a, 9, 15b      |
| 19                          | 27.5, CH <sub>3</sub>      | 1.24, s                                       |                                        | 1, 5, 9, 10                              | 4, 6, 9         |
| 20                          | 133.3, C                   |                                               |                                        |                                          |                 |
| 21                          | 174.6, C                   |                                               |                                        |                                          |                 |
| 22                          | 29.8, CH <sub>2</sub>      | a: 2.55<br>b: 2.38                            | 22b, 23<br>22a, 23                     | 17, 20, 21, 23, 24<br>17, 20, 21, 23, 24 | 24<br>24        |
| 23                          | 29.1, CH <sub>2</sub>      | 2.10                                          | 22a, 22b, 24                           | 20, 22, 24, 25                           |                 |
| 24                          | 124.4, CH                  | 5.13                                          | 23, 26, 27                             | 23, 26, 27                               | 22a, 22b, 26    |
| 25                          | 133.3, C                   |                                               |                                        |                                          |                 |
| 26                          | 25.9, CH <sub>3</sub>      | 1.67, br s                                    | 24                                     | 24, 25, 27                               | 24              |
| 27                          | 17.8, CH <sub>3</sub>      | 1.61, br s                                    | 24                                     | 24, 25, 26                               |                 |
| 28                          | 16.3, CH <sub>3</sub>      | 1.21, d (5.3)                                 | 4                                      | 3, 4, 5                                  | 5               |
| 30                          | 20.9, CH <sub>3</sub>      | 1.13, s                                       |                                        | 7, 8, 9, 14                              | 5, 11b, 13, 15a |
| 6- <u>COCH<sub>3</sub></u>  | 172.3, C                   |                                               |                                        |                                          |                 |
| 6- <u>COCH<sub>3</sub></u>  | 21.6, CH <sub>3</sub>      | 2.03, s                                       |                                        | 6- <u>COCH<sub>3</sub></u>               |                 |
| 16- <u>COCH<sub>3</sub></u> | 172.6, C                   |                                               |                                        |                                          |                 |
| 16- <u>COCH<sub>3</sub></u> | 20.7, CH <sub>3</sub>      | 1.96, s                                       |                                        | 16- <u>COCH<sub>3</sub></u>              |                 |

<sup>a</sup>The indiscernible signals from overlap or the complex multiplicity are reported without designating multiplicity

**Table S58** NMR data for **67** ( $^1\text{H}$  for 400 MHz and  $^{13}\text{C}$  for 100 MHz in acetone- $d_6$ ).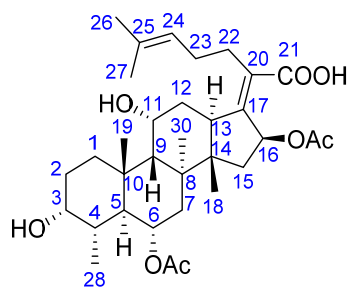**67**

| Position                     | $\delta_{\text{C}}$ , type | $\delta_{\text{H}}$ ( $J$ in Hz) <sup>a</sup> | $^1\text{H}$ - $^1\text{H}$ COSY | HMBC                                     | ROESY           |
|------------------------------|----------------------------|-----------------------------------------------|----------------------------------|------------------------------------------|-----------------|
| 1                            | 30.8, CH <sub>2</sub>      | a: 2.59<br>b: 1.49, br d (13.8)               | 1b, 2a, 2b<br>1a, 2a, 2b         | 3, 5                                     | 11, 19          |
| 2                            | 31.0, CH <sub>2</sub>      | a: 1.79<br>b: 1.67                            | 1a, 1b, 2b, 3<br>1a, 1b, 2a, 3   |                                          |                 |
| 3                            | 71.8, CH                   | 3.66, br s                                    | 2a, 2b, 4                        | 1, 5                                     | 28              |
| 4                            | 38.3, CH                   | 1.79                                          | 3, 5, 28                         |                                          | 6, 19           |
| 5                            | 40.2, CH                   | 2.67, t (10.4)                                | 4, 6                             | 1, 3, 4, 6, 10, 19                       | 28, 30          |
| 6                            | 73.3, CH                   | 4.84, br dd (9.6, 7.1)                        | 5, 7a, 7b                        | 8, 6- <u>COCH</u> <sub>3</sub>           | 4, 19, 28       |
| 7                            | 40.4, CH <sub>2</sub>      | a: 1.92<br>b: 1.19                            | 6, 7b<br>6, 7a                   | 8, 30<br>6, 8, 9                         |                 |
| 8                            | 39.5, C                    |                                               |                                  |                                          |                 |
| 9                            | 51.2, CH                   | 1.61                                          | 11                               | 8, 10, 11, 14, 19, 30                    | 12b, 18, 19     |
| 10                           | 36.8, C                    |                                               |                                  |                                          |                 |
| 11                           | 67.6, CH                   | 4.43, br s                                    | 9, 12a, 12b                      | 8, 13                                    | 1b, 19          |
| 12                           | 37.3, CH <sub>2</sub>      | a: 2.36<br>b: 1.90                            | 11, 12b, 13<br>11, 12a, 13       | 9, 11, 14<br>13                          | 9, 18           |
| 13                           | 44.1, CH                   | 3.16, br d (11.8)                             | 12a, 12b                         | 12, 14, 17, 18, 20                       | 15a, 16, 30     |
| 14                           | 48.8, C                    |                                               |                                  |                                          |                 |
| 15                           | 39.6, CH <sub>2</sub>      | a: 2.12<br>b: 1.21                            | 15b, 16<br>15a, 16               | 14, 18<br>13, 14, 16, 17, 18             | 13, 30<br>18    |
| 16                           | 74.7, CH                   | 5.82, br d (8.4)                              | 15a, 15b                         | 14, 17, 20, 16- <u>COCH</u> <sub>3</sub> | 13              |
| 17                           | 149.0, C                   |                                               |                                  |                                          |                 |
| 18                           | 17.5, CH <sub>3</sub>      | 0.92, s                                       |                                  | 8, 13, 14, 15                            | 9, 12b, 15b     |
| 19                           | 25.9, CH <sub>3</sub>      | 1.04, s                                       |                                  | 1, 5, 9, 10                              | 1b, 4, 6, 9, 11 |
| 20                           | 131.1, C                   |                                               |                                  |                                          |                 |
| 21                           | 171.3, C                   |                                               |                                  |                                          |                 |
| 22                           | 29.5, CH <sub>2</sub>      | a: 2.52<br>b: 2.41                            | 22b, 23<br>22a, 23               | 17, 20, 21<br>17, 20, 21                 | 24<br>24        |
| 23                           | 29.2, CH <sub>2</sub>      | 2.10                                          | 22a, 22b, 24                     | 24                                       |                 |
| 24                           | 124.3, CH                  | 5.14, br t (7.0)                              | 23, 26, 27                       | 26, 27                                   | 22a, 22b, 26    |
| 25                           | 132.6, C                   |                                               |                                  |                                          |                 |
| 26                           | 25.8, CH <sub>3</sub>      | 1.66, br s                                    | 24                               | 24, 25, 27                               | 24              |
| 27                           | 17.8, CH <sub>3</sub>      | 1.60, br s                                    | 24                               | 24, 25, 26                               |                 |
| 28                           | 17.5, CH <sub>3</sub>      | 0.88, d (6.9)                                 | 4                                | 3, 4, 5                                  | 3, 5, 6         |
| 30                           | 22.5, CH <sub>3</sub>      | 1.44, s                                       |                                  | 7, 8, 9, 14                              | 5, 13, 15a      |
| 6- <u>COCH</u> <sub>3</sub>  | 170.6, C                   |                                               |                                  |                                          |                 |
| 6- <u>COCH</u> <sub>3</sub>  | 21.9, CH <sub>3</sub>      | 1.96, s                                       |                                  | 6- <u>COCH</u> <sub>3</sub>              |                 |
| 16- <u>COCH</u> <sub>3</sub> | 170.3, C                   |                                               |                                  |                                          |                 |
| 16- <u>COCH</u> <sub>3</sub> | 20.6, CH <sub>3</sub>      | 1.88, s                                       |                                  | 16- <u>COCH</u> <sub>3</sub>             |                 |

<sup>a</sup>The indiscernible signals from overlap or the complex multiplicity are reported without designating multiplicity.

**Table S59** NMR data for **68** ( $^1\text{H}$  for 400 MHz and  $^{13}\text{C}$  for 100 MHz in  $\text{CD}_3\text{OD}$ ).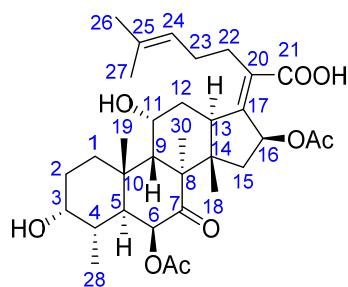**68**

| Position            | $\delta_{\text{C}}$ , type | $\delta_{\text{H}}$ ( $J$ in Hz) <sup>a</sup> | $^1\text{H}$ - $^1\text{H}$ COSY | HMBC                               | ROESY      |
|---------------------|----------------------------|-----------------------------------------------|----------------------------------|------------------------------------|------------|
| 1                   | 33.3, $\text{CH}_2$        | a: 2.28<br>b: 1.58                            | 1b, 2a, 2b<br>1a, 2a, 2b         | 3, 5                               | 11         |
| 2                   | 31.0, $\text{CH}_2$        | a: 1.90<br>b: 1.74                            | 1a, 1b, 2b, 3<br>1a, 1b, 2a, 3   |                                    |            |
| 3                   | 71.8, CH                   | 3.79, br s                                    | 2a, 2b, 4                        | 1, 5                               | 28         |
| 4                   | 33.7, CH                   | 2.02                                          | 3, 5, 28                         |                                    | 19         |
| 5                   | 41.1, CH                   | 2.41, dd (10.8, 1.4)                          | 4, 6                             | 3, 4, 7, 10, 19                    | 28, 30     |
| 6                   | 75.8, CH                   | 5.14, d (1.4)                                 | 5                                | 4, 5, 7, 8, 10, 6- $\text{COCH}_3$ | 28         |
| 7                   | 212.8, C                   |                                               |                                  |                                    |            |
| 8                   | 54.9, C                    |                                               |                                  |                                    |            |
| 9                   | 47.5, CH                   | 2.31, br s                                    | 11                               | 1, 7, 8, 10, 11, 14, 19, 30        | 18, 19     |
| 10                  | 38.1, C                    |                                               |                                  |                                    |            |
| 11                  | 67.7, CH                   | 4.44, br s                                    | 9, 12a, 12b                      | 8, 13                              | 1b, 19     |
| 12                  | 37.0, $\text{CH}_2$        | a: 2.35<br>b: 1.92                            | 11, 12b, 13<br>11, 12a, 13       | 13                                 |            |
| 13                  | 45.1, CH                   | 3.11, br d (11.6)                             | 12a, 12b                         | 12, 14, 17, 18, 20                 | 16, 30     |
| 14                  | 48.2, C                    |                                               |                                  |                                    |            |
| 15                  | 41.6, $\text{CH}_2$        | a: 2.31<br>b: 1.72, br d (14.6)               | 15b, 16<br>15a, 16               | 8, 14, 18<br>13, 14, 16, 17        | 30         |
| 16                  | 75.4, CH                   | 5.81, br d (8.4)                              | 15a, 15b                         | 14, 17, 20, 16- $\text{COCH}_3$    | 13         |
| 17                  | 146.8, C                   |                                               |                                  |                                    |            |
| 18                  | 18.3, $\text{CH}_3$        | 0.86, s                                       |                                  | 8, 13, 14, 15                      | 9          |
| 19                  | 24.3, $\text{CH}_3$        | 1.29, s                                       |                                  | 1, 5, 9, 10                        | 4, 9, 11   |
| 20                  | 133.0, C                   |                                               |                                  |                                    |            |
| 21                  | 174.3, C                   |                                               |                                  |                                    |            |
| 22                  | 29.8, $\text{CH}_2$        | a: 2.55<br>b: 2.38                            | 22b, 23<br>22a, 23               | 17, 20, 21, 23<br>17, 20, 21, 23   |            |
| 23                  | 29.2, $\text{CH}_2$        | 2.12                                          | 22a, 22b, 24                     | 22, 24, 25                         |            |
| 24                  | 124.3, CH                  | 5.13                                          | 23, 26, 27                       | 23, 26, 27                         | 26         |
| 25                  | 133.4, C                   |                                               |                                  |                                    |            |
| 26                  | 25.9, $\text{CH}_3$        | 1.67, br s                                    | 24                               | 24, 25, 27                         | 24         |
| 27                  | 17.9, $\text{CH}_3$        | 1.61, br s                                    | 24                               | 24, 25, 26                         |            |
| 28                  | 16.1, $\text{CH}_3$        | 0.96, d (6.8)                                 | 4                                | 3, 4, 5                            | 3, 5, 6    |
| 30                  | 22.8, $\text{CH}_3$        | 1.56, s                                       |                                  | 7, 8, 9, 14                        | 5, 13, 15a |
| 6- $\text{COCH}_3$  | 171.1, C                   |                                               |                                  |                                    |            |
| 6- $\text{COCH}_3$  | 20.8, $\text{CH}_3$        | 2.04, s                                       |                                  | 6- $\text{COCH}_3$                 |            |
| 16- $\text{COCH}_3$ | 172.5, C                   |                                               |                                  |                                    |            |
| 16- $\text{COCH}_3$ | 20.7, $\text{CH}_3$        | 1.95, s                                       |                                  | 16- $\text{COCH}_3$                |            |

<sup>a</sup>The indiscernible signals due to overlap or the complex multiplicity are reported without designating multiplicity.

**Table S60** NMR data for **69** ( $^1\text{H}$  for 600 MHz and  $^{13}\text{C}$  for 150 MHz in  $\text{CD}_3\text{OD}$ ).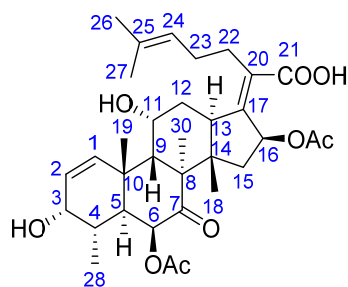**69**

| Position                    | $\delta_{\text{C}}$ , type | $\delta_{\text{H}}$ ( $J$ in Hz) <sup>a</sup> | $^1\text{H}-^1\text{H}$ COSY | HMBC                                    | ROESY        |
|-----------------------------|----------------------------|-----------------------------------------------|------------------------------|-----------------------------------------|--------------|
| 1                           | 142.1, CH                  | 6.71, d (10.2)                                | 2                            | 3, 5, 10                                | 11           |
| 2                           | 126.5, CH                  | 5.56, dd (10.1, 4.4)                          | 1, 3                         | 10                                      |              |
| 3                           | 69.0, CH                   | 3.96, t (4.5)                                 | 2, 4                         |                                         | 28           |
| 4                           | 32.4, CH                   | 2.28                                          | 3, 5, 28                     |                                         | 19           |
| 5                           | 41.1, CH                   | 2.45, dd (11.2, 2.4)                          | 4, 6                         | 3, 4, 9, 10, 19                         | 28, 30       |
| 6                           | 75.1, CH                   | 5.27, d (2.3)                                 | 5                            | 4, 5, 7, 10, 6- <u>COCH<sub>3</sub></u> | 28           |
| 7                           | 212.0, C                   |                                               |                              |                                         |              |
| 8                           | 54.5, C                    |                                               |                              |                                         |              |
| 9                           | 47.5, CH                   | 2.34, d (1.6)                                 | 11                           | 1, 5, 7, 8, 10, 11, 14, 19, 30          | 12b, 18, 19  |
| 10                          | 39.3, C                    |                                               |                              |                                         |              |
| 11                          | 67.9, CH                   | 4.56                                          | 9, 12a, 12b                  | 8, 13                                   | 1, 19        |
| 12                          | 36.6, CH <sub>2</sub>      | a: 2.39<br>b: 1.96                            | 11, 12b, 13<br>11, 12a, 13   | 13                                      | 9, 18        |
| 13                          | 44.7, CH                   | 3.09, br d (11.6)                             | 12a, 12b                     |                                         | 15a, 16, 30  |
| 14                          | 48.1, C                    |                                               |                              |                                         |              |
| 15                          | 41.6, CH <sub>2</sub>      | a: 2.25<br>b: 1.73, br d (14.6)               | 15b, 16<br>15a, 16           | 8, 14, 18<br>13, 14, 16, 17, 18         | 13, 30<br>18 |
| 16                          | 75.5, CH                   | 5.81, br d (8.4)                              | 15a, 15b                     | 13, 14, 16- <u>COCH<sub>3</sub></u>     | 13           |
| 17                          | 144.4, C <sup>b</sup>      |                                               |                              |                                         |              |
| 18                          | 18.1, CH <sub>3</sub>      | 0.90, s                                       |                              | 8, 13, 14, 15                           | 9, 12b, 15b  |
| 19                          | 29.0, CH <sub>3</sub>      | 1.28, s                                       |                              | 1, 5, 9, 10                             | 4, 9, 11     |
| 20                          | #                          |                                               |                              |                                         |              |
| 21                          | #                          |                                               |                              |                                         |              |
| 22                          | 30.1, CH <sub>2</sub>      | a: 2.55<br>b: 2.37                            | 22b, 23<br>22a, 23           | 23, 24<br>23, 24                        |              |
| 23                          | 29.2, CH <sub>2</sub>      | 2.12                                          | 22a, 22b, 24                 | 22, 24, 25                              |              |
| 24                          | 124.6, CH                  | 5.15, br t (7.2)                              | 23, 26, 27                   | 23, 26, 27                              | 26           |
| 25                          | 133.2, C                   |                                               |                              |                                         |              |
| 26                          | 25.9, CH <sub>3</sub>      | 1.67, br s                                    | 24                           | 24, 25, 27                              | 24           |
| 27                          | 17.9, CH <sub>3</sub>      | 1.61, br s                                    | 24                           | 24, 25, 26                              |              |
| 28                          | 14.3, CH <sub>3</sub>      | 1.01, d (6.7)                                 | 4                            | 3, 4, 5                                 | 3, 5, 6      |
| 30                          | 22.1, CH <sub>3</sub>      | 1.46, s                                       |                              | 7, 8, 9, 14                             | 5, 13, 15a   |
| 6- <u>COCH<sub>3</sub></u>  | 171.1, C                   |                                               |                              |                                         |              |
| 6-CO <u>CH<sub>3</sub></u>  | 20.8, CH <sub>3</sub>      | 2.06, s                                       |                              | 6- <u>COCH<sub>3</sub></u>              |              |
| 16- <u>COCH<sub>3</sub></u> | 172.7, C                   |                                               |                              |                                         |              |
| 16-CO <u>CH<sub>3</sub></u> | 20.8, CH <sub>3</sub>      | 1.97, s                                       |                              | 16- <u>COCH<sub>3</sub></u>             |              |

<sup>a</sup>The indiscernible signals from overlap or the complex multiplicity are reported without designating multiplicity.<sup>b</sup>The data is observed in the HMBC spectrum. #The data are not observed in NMR spectra.

**Table S61** NMR data for **81** ( $^1\text{H}$  for 600 MHz and  $^{13}\text{C}$  for 150 MHz in  $\text{CDCl}_3$ ).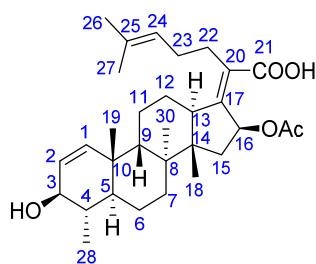**81**

| Position                     | $\delta_{\text{C}}$ , type | $\delta_{\text{H}}$ ( $J$ in Hz) <sup>a</sup>   | $^1\text{H}$ - $^1\text{H}$ COSY       | HMBC                                     | ROESY            |
|------------------------------|----------------------------|-------------------------------------------------|----------------------------------------|------------------------------------------|------------------|
| 1                            | 139.4, CH                  | 6.06, br d (10.4)                               | 2, 3                                   | 3, 5, 10                                 | 11a, 11b, 19     |
| 2                            | 128.1, CH                  | 5.44, dd (10.0, 2.3)                            | 1, 3                                   | 4, 10                                    | 11a, 11b, 19     |
| 3                            | 76.6, CH                   | 3.77, br d (7.9)                                | 1, 2, 4                                | 1, 2, 4, 28                              | 5, 28            |
| 4                            | 37.7, CH                   | 1.77                                            | 3, 5, 28                               | 3, 5, 10, 28                             | 19               |
| 5                            | 44.1, CH                   | 1.65                                            | 4, 6a, 6b                              | 1, 3, 4, 6, 7, 9, 10, 19                 | 3, 30            |
| 6                            | 19.7, CH <sub>2</sub>      | a: 1.57<br>b: 1.10                              | 5, 6b, 7a, 7b<br>5, 6a, 7a, 7b         | 4, 5, 7, 8, 10<br>4, 5, 7, 10            |                  |
| 7                            | 33.6, CH <sub>2</sub>      | a: 1.91, br dd (14.3, 7.1)<br>b: 1.19           | 6a, 6b, 7b<br>6a, 6b, 7a               | 5, 6, 8, 14, 30<br>6, 8, 9, 30           | 18               |
| 8                            | 38.5, C                    |                                                 |                                        |                                          |                  |
| 9                            | 43.8, CH                   | 1.53, dd (12.8, 2.5)                            | 11a, 11b                               | 1, 5, 8, 10, 11, 19, 30                  | 18, 19           |
| 10                           | 37.7, C                    |                                                 |                                        |                                          |                  |
| 11                           | 24.7, CH <sub>2</sub>      | a: 1.70<br>b: 1.34, qd (12.9, 3.5)              | 9, 11b, 12a, 12b<br>9, 11a, 12a, 12b   | 9, 12                                    | 1, 2<br>1, 2, 13 |
| 12                           | 26.2, CH <sub>2</sub>      | a: 2.27<br>b: 1.65                              | 11a, 11b, 12b, 13<br>11a, 11b, 12a, 13 | 9, 14<br>11, 13                          |                  |
| 13                           | 49.0, CH                   | 2.52                                            | 12a, 12b                               | 12, 14, 17, 18, 20                       | 11b, 15a, 16, 30 |
| 14                           | 48.5, C                    |                                                 |                                        |                                          |                  |
| 15                           | 39.1, CH <sub>2</sub>      | a: 2.00, dd (14.6, 8.9)<br>b: 1.27, br d (14.2) | 15b, 16<br>15a, 16                     | 8, 13, 14, 18,<br>14, 16, 17, 18         | 13, 30<br>18     |
| 16                           | 74.1, CH                   | 5.85, br d (8.3)                                | 15a, 15b                               | 14, 17, 20, 16- <u>COCH</u> <sub>3</sub> | 13               |
| 17                           | 149.4, C                   |                                                 |                                        |                                          |                  |
| 18                           | 18.3, CH <sub>3</sub>      | 0.94, s                                         |                                        | 8, 13, 14, 15                            | 7a, 9, 15b       |
| 19                           | 27.8, CH <sub>3</sub>      | 1.03, s                                         |                                        | 1, 5, 9, 10                              | 1, 2, 4, 9       |
| 20                           | 130.4, C                   |                                                 |                                        |                                          |                  |
| 21                           | 174.3, C                   |                                                 |                                        |                                          |                  |
| 22                           | 28.6, CH <sub>2</sub>      | a: 2.50<br>b: 2.42                              | 22b, 23a, 23b<br>22a, 23a, 23b         | 17, 20, 21, 23, 24<br>17, 20, 21, 23, 24 | 24<br>24         |
| 23                           | 28.2, CH <sub>2</sub>      | a: 2.11<br>b: 2.05                              | 22a, 22b, 23b, 24<br>22a, 22b, 23a, 24 | 20, 22, 24, 25<br>20, 22, 24, 25         |                  |
| 24                           | 123.1, CH                  | 5.09, br t (7.0)                                | 23a, 23b, 26, 27                       | 23, 26, 27                               | 22a, 22b, 26     |
| 25                           | 132.5, C                   |                                                 |                                        |                                          |                  |
| 26                           | 25.7, CH <sub>3</sub>      | 1.67, br s                                      | 24                                     | 24, 25, 27                               | 24               |
| 27                           | 17.7, CH <sub>3</sub>      | 1.59, br s                                      | 24                                     | 24, 25, 26                               |                  |
| 28                           | 16.5, CH <sub>3</sub>      | 1.02, d (6.4)                                   | 4                                      | 3, 4, 5                                  | 3                |
| 30                           | 21.5, CH <sub>3</sub>      | 0.98, s                                         |                                        | 7, 8, 9, 14                              | 5, 13, 15a       |
| 16- <u>COCH</u> <sub>3</sub> | 171.0, C                   |                                                 |                                        |                                          |                  |
| 16- <u>COCH</u> <sub>3</sub> | 20.7, CH <sub>3</sub>      | 1.96, s                                         |                                        | 16- <u>COCH</u> <sub>3</sub>             |                  |

<sup>a</sup>The indiscernible signals from overlap or the complex multiplicity are reported without designating multiplicity.

**Table S62** The Boltzmann distribution for two possible structures (**34-A** and **34-B**) of **34**.

| <b>34-A</b> |                  | <b>34-B</b> |                  |
|-------------|------------------|-------------|------------------|
| Conformer   | Contribution (%) | Conformer   | Contribution (%) |
| 1           | 26.06            | 1           | 35.62            |
| 2           | 6.25             | 2           | 8.36             |
| 3           | 4.73             | 3           | 3.78             |
| 4           | 13.84            | 4           | 28.83            |
| 5           | 20.92            | 5           | 5.26             |
| 6           | 6.75             | 6           | 9.30             |
| 7           | 3.37             | 7           | 3.12             |
| 8           | 3.72             | 8           | 4.34             |
| 9           | 10.83            | 9           | 1.40             |
| 10          | 3.53             |             |                  |

**Table S63** The Boltzmann distribution for two possible structures (**35-A** and **35-B**) of **35**.

| <b>35-A</b> |                  | <b>35-B</b> |                  |           |                  |
|-------------|------------------|-------------|------------------|-----------|------------------|
| Conformer   | Contribution (%) | Conformer   | Contribution (%) | Conformer | Contribution (%) |
| 1           | 12.68            | 1           | 3.46             | 20        | 4.99             |
| 2           | 2.45             | 2           | 1.22             | 21        | 5.47             |
| 3           | 3.92             | 3           | 3.29             | 22        | 3.67             |
| 4           | 8.85             | 4           | 3.43             | 23        | 4.2              |
| 5           | 2.77             | 5           | 1.59             | 24        | 3.7              |
| 6           | 2.37             | 6           | 2.6              | 25        | 3.89             |
| 7           | 7.07             | 7           | 2.53             | 26        | 1.97             |
| 8           | 11.51            | 8           | 4.53             | 27        | 1.89             |
| 9           | 4.60             | 9           | 1.25             | 28        | 1.16             |
| 10          | 3.52             | 10          | 4.23             | 29        | 1.59             |
| 11          | 7.83             | 11          | 1.52             | 30        | 1.57             |
| 12          | 5.75             | 12          | 1.52             | 31        | 3.22             |
| 13          | 3.38             | 13          | 2.62             | 32        | 1.08             |
| 14          | 2.42             | 14          | 1.48             | 33        | 1.08             |
| 15          | 5.83             | 15          | 5.81             | 34        | 1.92             |
| 16          | 4.98             | 16          | 2.03             | 35        | 1.51             |
| 17          | 3.00             | 17          | 1.96             | 36        | 1.86             |
| 18          | 5.11             | 18          | 1.25             | 37        | 3.51             |
| 19          | 1.95             | 19          | 1.59             | 38        | 3.64             |



**Table S64** The Boltzmann distribution for two possible structures (**38-A** and **38-B**) of **38**.

| <b>38-A</b> |                  | <b>38-B</b> |                  |           |                  |
|-------------|------------------|-------------|------------------|-----------|------------------|
| Conformer   | Contribution (%) | Conformer   | Contribution (%) | Conformer | Contribution (%) |
| 1           | 3.47             | 1           | 1.39             | 18        | 2.10             |
| 2           | 1.95             | 2           | 4.95             | 19        | 2.51             |
| 3           | 4.52             | 3           | 3.57             | 20        | 1.59             |
| 4           | 2.73             | 4           | 2.25             | 21        | 1.52             |
| 5           | 10.94            | 5           | 1.61             | 22        | 11.29            |
| 6           | 14.42            | 6           | 2.65             | 23        | 7.94             |
| 7           | 6.07             | 7           | 1.69             | 24        | 3.79             |
| 8           | 8.12             | 8           | 1.64             | 25        | 2.50             |
| 9           | 2.72             | 9           | 5.98             | 26        | 1.88             |
| 10          | 1.86             | 10          | 3.98             | 27        | 2.95             |
| 11          | 1.25             | 11          | 7.19             | 28        | 1.85             |
| 12          | 5.06             | 12          | 8.06             |           |                  |
| 13          | 1.44             | 13          | 5.54             |           |                  |
| 14          | 12.36            | 14          | 3.25             |           |                  |
| 15          | 15.71            | 15          | 1.30             |           |                  |
| 16          | 4.66             | 16          | 3.08             |           |                  |
| 17          | 2.71             | 17          | 1.97             |           |                  |

**Table S65** The Boltzmann distribution for two possible structures (**42-A** and **42-B**) of **42**.

| <b>42-A</b> |                  | <b>42-B</b> |                  |
|-------------|------------------|-------------|------------------|
| Conformer   | Contribution (%) | Conformer   | Contribution (%) |
| 1           | 4.02             | 1           | 25.98            |
| 2           | 12.98            | 2           | 8.08             |
| 3           | 14.16            | 3           | 28.67            |
| 4           | 1.28             | 4           | 16.30            |
| 5           | 4.30             | 5           | 3.24             |
| 6           | 4.74             | 6           | 3.61             |
| 7           | 4.37             | 7           | 2.06             |
| 8           | 14.27            | 8           | 3.93             |
| 9           | 2.54             | 9           | 1.25             |
| 10          | 8.11             | 10          | 4.38             |
| 11          | 15.68            | 11          | 2.51             |
| 12          | 9.19             |             |                  |
| 13          | 4.37             |             |                  |

**Table S66** Comparison of the chemical shifts of compounds **38** and **40**.

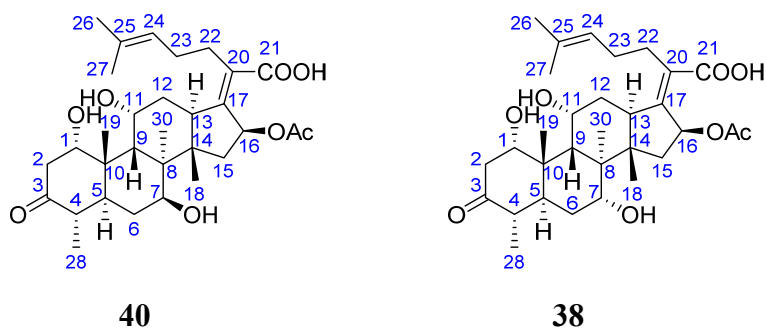

|          | <b>40</b>             | <b>38</b>             |
|----------|-----------------------|-----------------------|
| Position | $\delta_c$ , type     | $\delta_c$ , type     |
| 1        | 84.1, CH              | 83.8, CH              |
| 2        | 42.9, CH <sub>2</sub> | 42.9, CH <sub>2</sub> |
| 3        | 216.9, C              | 216.6, C              |
| 4        | 45.3, CH              | 45.2, CH              |
| 5        | 36.9, CH              | 37.1, CH              |
| 10       | 43.9, C               | 43.8, C               |
| 19       | 21.3, CH <sub>3</sub> | 21.7, CH <sub>3</sub> |

The relative configuration of **40** is assigned as  $1S^*,4S^*,5S^*,7S^*,8S^*,9S^*,10S^*,11R^*,13R^*,14S^*,16S^*$ .

**Table S67** R square ( $R^2$ ) of the linear correlations, mean absolute error (MAE) values and DP4+ probabilities of **34-A/34-B** and **42-A/42-B** of **34** and **42**, respectively.

| No.                  | <b>34</b>               |                         |       | <b>34-B</b>             |       |                         | <b>42</b>               |       |                         | <b>42-B</b> |  |
|----------------------|-------------------------|-------------------------|-------|-------------------------|-------|-------------------------|-------------------------|-------|-------------------------|-------------|--|
|                      | $\delta_{\text{exptl}}$ | $\delta_{\text{corr.}}$ | AE    | $\delta_{\text{corr.}}$ | AE    | $\delta_{\text{exptl}}$ | $\delta_{\text{corr.}}$ | AE    | $\delta_{\text{corr.}}$ | AE          |  |
| 1                    | 139.4                   | 138.32                  | 1.08  | 136.27                  | 3.13  | 138.4                   | 138.33                  | 0.07  | 136.31                  | 2.09        |  |
| 2                    | 127.9                   | 126.08                  | 1.82  | 127.11                  | 0.79  | 129.1                   | 126.17                  | 2.93  | 127.85                  | 1.25        |  |
| 3                    | 68.2                    | 69.61                   | 1.41  | 75.69                   | 7.49  | 67.9                    | 69.72                   | 1.82  | 75.83                   | 7.93        |  |
| 4                    | 32.5                    | 35.03                   | 2.53  | 38.45                   | 5.95  | 31.1                    | 33.18                   | 2.08  | 36.22                   | 5.12        |  |
| 5                    | 36.3                    | 37.37                   | 1.07  | 41.05                   | 4.75  | 53.4                    | 52.94                   | 0.46  | 56.49                   | 3.09        |  |
| 6                    | 38.9                    | 40.52                   | 1.62  | 40.19                   | 1.29  | 216.1                   | 215.36                  | 0.74  | 214.25                  | 1.85        |  |
| 7                    | 217.7                   | 218.77                  | 1.07  | 218.63                  | 0.93  | 52.8                    | 53.90                   | 1.10  | 52.87                   | 0.07        |  |
| 8                    | 52.2                    | 56.16                   | 3.96  | 55.59                   | 3.39  | 43.2                    | 46.83                   | 3.63  | 45.76                   | 2.56        |  |
| 9                    | 43.2                    | 43.50                   | 0.30  | 42.65                   | 0.55  | 47.5                    | 47.33                   | 0.17  | 46.30                   | 1.20        |  |
| 10                   | 37.9                    | 41.64                   | 3.74  | 40.32                   | 2.42  | 43.3                    | 47.39                   | 4.09  | 46.05                   | 2.75        |  |
| 11                   | 24.1                    | 25.61                   | 1.51  | 24.66                   | 0.56  | 26.7                    | 28.08                   | 1.38  | 27.20                   | 0.50        |  |
| 12                   | 26.0                    | 27.44                   | 1.44  | 26.58                   | 0.58  | 27                      | 28.28                   | 1.28  | 27.50                   | 0.50        |  |
| 13                   | 49.3                    | 51.63                   | 2.33  | 50.88                   | 1.58  | 49.6                    | 53.06                   | 3.46  | 52.39                   | 2.79        |  |
| 14                   | 46.8                    | 50.68                   | 3.88  | 49.86                   | 3.06  | 49.5                    | 51.87                   | 2.37  | 51.14                   | 1.64        |  |
| 15                   | 40.6                    | 40.46                   | 0.14  | 39.64                   | 0.96  | 40.2                    | 40.17                   | 0.03  | 39.40                   | 0.80        |  |
| 16                   | 73.7                    | 74.92                   | 1.22  | 74.26                   | 0.56  | 75.4                    | 76.17                   | 0.77  | 75.69                   | 0.29        |  |
| 17                   | 147.7                   | 155.59                  | 7.89  | 155.39                  | 7.69  | 146.3                   | 158.72                  | 12.42 | 158.67                  | 12.37       |  |
| 18                   | 17.4                    | 15.85                   | 1.55  | 14.61                   | 2.79  | 19                      | 19.53                   | 0.53  | 18.73                   | 0.27        |  |
| 19                   | 25.9                    | 24.64                   | 1.26  | 25.73                   | 0.17  | 28.4                    | 27.46                   | 0.94  | 28.48                   | 0.08        |  |
| 20                   | 130.3                   | 128.78                  | 1.52  | 128.31                  | 1.99  | 133.8                   | 130.01                  | 3.79  | 129.82                  | 3.98        |  |
| 21                   | 173.7                   | 166.36                  | 7.34  | 165.96                  | 7.74  | 174.7                   | 167.50                  | 7.20  | 167.44                  | 7.26        |  |
| 22                   | 28.6                    | 24.68                   | 3.92  | 23.76                   | 4.84  | 29.9                    | 25.82                   | 4.08  | 24.99                   | 4.91        |  |
| 23                   | 28.3                    | 14.91                   | 13.39 | 13.96                   | 14.34 | 29.1                    | 15.94                   | 13.16 | 15.03                   | 14.07       |  |
| 28                   | 13.9                    | 14.02                   | 0.12  | 14.96                   | 1.06  | 14.1                    | 13.83                   | 0.27  | 15.15                   | 1.05        |  |
| 30                   | 17.6                    | 18.86                   | 1.26  | 18.10                   | 0.50  | 21.1                    | 22.09                   | 0.99  | 21.01                   | 0.09        |  |
| 16-COCH <sub>3</sub> | 170.6                   | 167.67                  | 2.93  | 167.39                  | 3.21  | 172.6                   | 169.84                  | 2.76  | 169.85                  | 2.75        |  |
| 16-COCH <sub>3</sub> | 20.6                    | 20.25                   | 0.35  | 19.35                   | 1.25  | 20.7                    | 21.29                   | 0.59  | 20.44                   | 0.26        |  |
| MAE                  |                         | 2.20                    |       | 2.66                    |       |                         | 2.71                    |       | 3.02                    |             |  |
| R <sup>2</sup>       |                         | 0.9955                  |       | 0.9940                  |       |                         | 0.9943                  |       | 0.9932                  |             |  |
| DP4+                 |                         | 100.0%                  |       | 0.00%                   |       |                         | 100.00%                 |       | 0.00%                   |             |  |

AE: absolute error; MAE: mean absolute error.

Based on the values of MAE,  $R^2$  and DP4+, the relative configuration of **34** is assigned as **3R\*,4S\*,5S\*,8S\*,9S\*,10S\*,13R\*,14S\*,16S\***, and the relative configuration of **42** is assigned as **3R\*,4S\*,5S\*,8S\*,9S\*,10R\*,13R\*,14S\*,16S\***.

**Table S68** R square ( $R^2$ ) of the linear correlations, mean absolute error (MAE) values and DP4+ probabilities of **35-A/35-B** and **38-A/38-B** of **35** and **38**, respectively.

| No.                  | <b>35</b>               |                         |       | <b>35-B</b>             |       |                         | <b>38</b>               |       |                         | <b>38-B</b> |  |  |
|----------------------|-------------------------|-------------------------|-------|-------------------------|-------|-------------------------|-------------------------|-------|-------------------------|-------------|--|--|
|                      | $\delta_{\text{exptl}}$ | $\delta_{\text{corr.}}$ | AE    | $\delta_{\text{corr.}}$ | AE    | $\delta_{\text{exptl}}$ | $\delta_{\text{corr.}}$ | AE    | $\delta_{\text{corr.}}$ | AE          |  |  |
| 1                    | 84.7                    | 74.02                   | 10.68 | 73.57                   | 11.13 | 83.4                    | 74.73                   | 8.67  | 74.04                   | 9.76        |  |  |
| 2                    | 42.1                    | 47.98                   | 5.88  | 47.19                   | 5.09  | 42.9                    | 48.53                   | 5.63  | 49.67                   | 6.77        |  |  |
| 3                    | 217.2                   | 216.63                  | 0.57  | 216.95                  | 0.25  | 216.6                   | 213.53                  | 3.07  | 211.17                  | <b>5.43</b> |  |  |
| 4                    | 46.9                    | 46.92                   | 0.02  | 47.73                   | 0.83  | 45.2                    | 50.17                   | 4.97  | 46.18                   | 0.98        |  |  |
| 5                    | 43.6                    | 44.81                   | 1.21  | 46.89                   | 3.29  | 37.1                    | 39.85                   | 2.75  | 39.71                   | 2.61        |  |  |
| 6                    | 81.9                    | 77.25                   | 4.65  | 73.91                   | 7.99  | 33.4                    | 35.77                   | 2.37  | 33.84                   | 0.44        |  |  |
| 7                    | 86.1                    | 88.19                   | 2.09  | 88.85                   | 2.75  | 71.5                    | 71.50                   | 0.00  | 69.91                   | 1.59        |  |  |
| 8                    | 42.1                    | 49.59                   | 7.49  | 50.55                   | 8.45  | 43.2                    | 48.76                   | 5.56  | 49.75                   | 6.55        |  |  |
| 9                    | 47.1                    | 49.03                   | 1.93  | 47.58                   | 0.48  | 52.5                    | 53.16                   | 0.66  | 49.66                   | 2.84        |  |  |
| 10                   | 44.2                    | 50.25                   | 6.05  | 49.45                   | 5.25  | 43.8                    | 46.66                   | 2.86  | 48.01                   | 4.21        |  |  |
| 11                   | 78.5                    | 71.09                   | 7.41  | 69.82                   | 8.68  | 77.9                    | 70.11                   | 7.79  | 69.16                   | 8.74        |  |  |
| 12                   | 28.7                    | 36.87                   | 8.17  | 37.21                   | 8.51  | 28.4                    | 37.35                   | 8.95  | 38.07                   | 9.67        |  |  |
| 13                   | 45.9                    | 48.64                   | 2.74  | 49.80                   | 3.90  | 45.1                    | 48.46                   | 3.36  | 49.33                   | 4.23        |  |  |
| 14                   | 50.7                    | 52.91                   | 2.21  | 53.22                   | 2.52  | 49.9                    | 51.86                   | 1.96  | 52.69                   | 2.79        |  |  |
| 15                   | 39.0                    | 41.01                   | 2.01  | 41.15                   | 2.15  | 41.7                    | 43.33                   | 1.63  | 41.74                   | 0.04        |  |  |
| 16                   | 76.7                    | 75.60                   | 1.10  | 76.76                   | 0.06  | 76.8                    | 75.65                   | 1.15  | 76.13                   | 0.67        |  |  |
| 17                   | 145.5                   | 159.03                  | 13.53 | 159.77                  | 14.27 | 144.8                   | 159.01                  | 14.21 | 162.87                  | 18.07       |  |  |
| 18                   | 18.9                    | 19.60                   | 0.70  | 18.54                   | 0.36  | 16                      | 18.21                   | 2.21  | 21.59                   | 5.59        |  |  |
| 19                   | 22.7                    | 21.73                   | 0.97  | 17.64                   | 5.06  | 31.7                    | 25.44                   | 6.26  | 16.14                   | 5.56        |  |  |
| 20                   | 134.0                   | 130.04                  | 3.96  | 130.29                  | 3.71  | 133.4                   | 130.64                  | 2.76  | 131.64                  | 1.76        |  |  |
| 21                   | 174.9                   | 168.51                  | 6.39  | 167.77                  | 7.13  | 174.5                   | 168.42                  | 6.08  | 167.40                  | 7.10        |  |  |
| 22                   | 30.4                    | 25.13                   | 5.27  | 25.96                   | 4.44  | 30.4                    | 26.24                   | 4.16  | 26.50                   | 3.90        |  |  |
| 23                   | 28.8                    | 16.20                   | 12.60 | 15.79                   | 13.01 | 28.8                    | 16.48                   | 12.32 | 16.74                   | 12.06       |  |  |
| 28                   | 18.5                    | 14.41                   | 4.09  | 19.64                   | 1.14  | 15.5                    | 13.06                   | 2.44  | 13.37                   | 2.13        |  |  |
| 30                   | 21.1                    | 26.53                   | 5.43  | 26.01                   | 4.91  | 18.2                    | 15.43                   | 2.77  | 16.69                   | 1.51        |  |  |
| 16-COCH <sub>3</sub> | 172.6                   | 170.55                  | 2.05  | 170.29                  | 2.31  | 172.5                   | 170.74                  | 1.76  | 171.13                  | 1.37        |  |  |
| 16-COCH <sub>3</sub> | 20.7                    | 20.97                   | 0.27  | 21.39                   | 0.69  | 20.7                    | 22.90                   | 2.20  | 23.08                   | 2.38        |  |  |
| MAE                  |                         | 4.42                    |       | 4.75                    |       |                         | 4.39                    |       | 4.77                    |             |  |  |
| R <sup>2</sup>       |                         | 0.9884                  |       | 0.9867                  |       |                         | 0.9892                  |       | 0.9864                  |             |  |  |
| DP4+                 |                         | 99.98%                  |       | 0.02%                   |       |                         | 100.00%                 |       | 0.00%                   |             |  |  |

AE: absolute error; MAE: mean absolute error.

Based on the values of MAE,  $R^2$  and DP4+, the relative configuration of **35** is assigned as 1*S*\*,4*S*\*,5*S*\*,6*R*\*,7*R*\*,8*S*\*,9*S*\*,10*S*\*,11*R*\*,13*R*\*,14*S*\*,16*S*\*, and the relative configuration of **38** is assigned as 1*S*\*,4*S*\*,5*S*\*,7*R*\*,8*S*\*,9*S*\*,10*S*\*,11*R*\*,13*R*\*,14*S*\*,16*S*\*.

**Table S69** Comparison of the coupling constants of compounds containing C1–C2 double bond and C3-hydroxyl group.

|                          |           |           |           |           |           |           |
|--------------------------|-----------|-----------|-----------|-----------|-----------|-----------|
| Compound                 | <b>6</b>  | <b>81</b> | <b>29</b> | <b>30</b> | <b>32</b> | <b>34</b> |
| $^3J_{(H-3, H-4)}$ in Hz | 4.4       | 7.9       | 4.9       | 4.1       | 4.4       | 4.3       |
| Compound                 | <b>41</b> | <b>42</b> | <b>43</b> | <b>63</b> | <b>64</b> | <b>65</b> |
| $^3J_{(H-3, H-4)}$ in Hz | 4.4       | 4.6       | 4.5       | 4.3       | 4.0       | 4.3       |
| Compound                 | <b>69</b> |           |           |           |           |           |
| $^3J_{(H-3, H-4)}$ in Hz | 4.5       |           |           |           |           |           |

Based on the coupling constants between H-3 and H-4, 3-OH in **29**, **30**, **32**, **34**, **41–43**, **63–65**, and **69** were determined to be  $\alpha$ -oriented.

**Table S70** Primers used for constructing recombinant plasmids.

| Primer name         | Sequence (5' to 3')                     | Usage                                                                                                                                                                     |
|---------------------|-----------------------------------------|---------------------------------------------------------------------------------------------------------------------------------------------------------------------------|
| Inf-pBarI-HindIII-F | TGATTACGCCAAGCTCGACTCCAATC<br>TTCAAGAGC | Construction of recombinant pBarI and pPTRI plasmids containing one or two genes using the ClonExpress®II One Step Cloning Kit or ClonExpress®MultiS One Step Cloning Kit |
| Inf-pTA-Tamy-R1     | AACGCGCTCGCGAGCAAGTACCATAC<br>AGTACCGCG |                                                                                                                                                                           |
| Inf-pTA-Parm-F1     | GCTCGCGAGCGCGTTCCACTGCATCA<br>TCAGTCTAG |                                                                                                                                                                           |
| Inf-pBarI-HindIII-R | GCAGGCATGCAAGCTGTAAGATACAT<br>GAGCTTCGG |                                                                                                                                                                           |
| Inf-pPTRI-HindIII-F | TGATTACGCCAAGCTCGACTCCAATC<br>TTCAAGAGC |                                                                                                                                                                           |
| Inf-pPTRI-HindIII-R | GCAGGCATGCAAGCTGTAAGATACAT<br>GAGCTTCGG |                                                                                                                                                                           |

**Table S71** Plasmids used in the study.

| Plasmid                   | Characteristic                                                                                                                                   | Source                       |
|---------------------------|--------------------------------------------------------------------------------------------------------------------------------------------------|------------------------------|
| pTAex3                    | Plasmid containing <i>argB</i> maker gene cassette for gene expression in <i>A. oryzae</i> NSAR1, ( <i>Amp<sup>R</sup></i> )                     | Fujii, et al. <sup>3</sup>   |
| pBarI                     | Plasmid containing <i>bar</i> maker gene cassette for gene expression in <i>A. oryzae</i> NSAR1, ( <i>Amp<sup>R</sup></i> )                      | Matsuda, et al. <sup>4</sup> |
| pPTRI                     | Plasmid containing <i>ptrA</i> maker gene cassette for gene expression in <i>A. oryzae</i> NSAR1, ( <i>Amp<sup>R</sup></i> )                     | TaKaRa                       |
| pTAex3- <i>helB3</i>      | pTAex3 containing <i>helB3</i> whose expression is regulated by <i>amyB</i> promoter, ( <i>Amp<sup>R</sup></i> )                                 | Lv, et al. <sup>5</sup>      |
| pTAex3- <i>helD1</i>      | pTAex3 containing <i>helD1</i> whose expression is regulated by <i>amyB</i> promoter, ( <i>Amp<sup>R</sup></i> )                                 |                              |
| pTAex3- <i>helE</i>       | pTAex3 containing <i>helE</i> whose expression is regulated by <i>amyB</i> promoter, ( <i>Amp<sup>R</sup></i> )                                  |                              |
| pTAex3- <i>fusC1</i>      | pTAex3 containing <i>fusC1</i> whose expression is regulated by <i>amyB</i> promoter, ( <i>Amp<sup>R</sup></i> )                                 | Cao, et al. <sup>6</sup>     |
| pTAex3- <i>fusB1</i>      | pTAex3 containing <i>fusB1</i> whose expression is regulated by <i>amyB</i> promoter, ( <i>Amp<sup>R</sup></i> )                                 |                              |
| pPTRI- <i>fusC1</i>       | pPTRI containing <i>fusC1</i> whose expressions is regulated by <i>amyB</i> promoter, ( <i>Amp<sup>R</sup></i> )                                 |                              |
| pTAex3- <i>cepB4</i>      | pTAex3 containing <i>cepB4</i> whose expression is regulated by <i>amyB</i> promoter, ( <i>Amp<sup>R</sup></i> )                                 | Cao, et al. <sup>7</sup>     |
| pTAex3- <i>cepD2</i>      | pTAex3 containing <i>cepD2</i> whose expression is regulated by <i>amyB</i> promoter, ( <i>Amp<sup>R</sup></i> )                                 |                              |
| pPTRI- <i>cepB4</i>       | pPTRI containing <i>cepB4</i> whose expressions is regulated by <i>amyB</i> promoter, ( <i>Amp<sup>R</sup></i> )                                 |                              |
| pPTRI- <i>cepD2</i>       | pPTRI containing <i>cepD2</i> whose expressions is regulated by <i>amyB</i> promoter, ( <i>Amp<sup>R</sup></i> )                                 |                              |
| pPTRI- <i>helD1</i>       | pPTRI containing <i>helD1</i> whose expressions is regulated by <i>amyB</i> promoter, ( <i>Amp<sup>R</sup></i> )                                 | This work                    |
| pPTRI- <i>helB3</i>       | pPTRI containing <i>helB3</i> whose expressions is regulated by <i>amyB</i> promoter, ( <i>Amp<sup>R</sup></i> )                                 | This work                    |
| pPTRI- <i>helB3-fusC1</i> | pPTRI containing <i>helB3</i> and <i>fusC1</i> whose expressions are independently regulated by <i>amyB</i> promoter, ( <i>Amp<sup>R</sup></i> ) | This work                    |
| pPTRI- <i>helB3-helD1</i> | pPTRI containing <i>helB3</i> and <i>helD1</i> whose expressions are independently regulated by <i>amyB</i> promoter, ( <i>Amp<sup>R</sup></i> ) | This work                    |
| pPTRI- <i>fusB1-helD1</i> | pPTRI containing <i>fusB1</i> and <i>helD1</i> whose expressions are independently regulated by <i>amyB</i> promoter, ( <i>Amp<sup>R</sup></i> ) | This work                    |
| pPTRI- <i>cepB4-cepD2</i> | pPTRI containing <i>cepB4</i> and <i>cepD2</i> whose expressions are independently regulated by <i>amyB</i> promoter, ( <i>Amp<sup>R</sup></i> ) | Cao, et al. <sup>7</sup>     |
| pPTRI- <i>cepB4-cepC2</i> | pPTRI containing <i>cepB4</i> and <i>cepC2</i> whose expressions are independently regulated by <i>amyB</i> promoter, ( <i>Amp<sup>R</sup></i> ) |                              |
| pBarI- <i>helE-cepB4</i>  | pBarI containing <i>helE</i> and <i>cepB4</i> whose expressions are independently regulated by <i>amyB</i> promoter, ( <i>Amp<sup>R</sup></i> )  | This work                    |
| pBarI- <i>helE-fusB1</i>  | pBarI containing <i>helE</i> and <i>fusB1</i> whose expressions are independently regulated by <i>amyB</i> promoter, ( <i>Amp<sup>R</sup></i> )  | This work                    |
| pBarI- <i>helE-fusC1</i>  | pBarI containing <i>helE</i> and <i>fusC1</i> whose expressions are independently regulated by <i>amyB</i> promoter, ( <i>Amp<sup>R</sup></i> )  | This work                    |
| pBarI- <i>helB3-fusB1</i> | pBarI containing <i>helB3</i> and <i>fusB1</i> whose expressions are independently regulated by <i>amyB</i> promoter, ( <i>Amp<sup>R</sup></i> ) | This work                    |
| pBarI- <i>helB3-fusC1</i> | pBarI containing <i>helB3</i> and <i>fusC1</i> whose expressions are independently regulated by <i>amyB</i> promoter, ( <i>Amp<sup>R</sup></i> ) | This work                    |
| pBarI- <i>fusB1-cepB4</i> | pBarI containing <i>fusB1</i> and <i>cepB4</i> whose expressions are independently regulated by <i>amyB</i> promoter, ( <i>Amp<sup>R</sup></i> ) | This work                    |
| pBarI- <i>fusC1-cepD2</i> | pBarI containing <i>fusC1</i> and <i>cepD2</i> whose expressions are independently regulated by <i>amyB</i> promoter, ( <i>Amp<sup>R</sup></i> ) | This work                    |

**Table S72** Strains used in the study.

| Strain                 | Characteristic                                                                                                                                                  | Source                   |
|------------------------|-----------------------------------------------------------------------------------------------------------------------------------------------------------------|--------------------------|
| <i>E. coli</i> DH5a    | Host for general plasmid cloning                                                                                                                                | TaKaRa                   |
| <i>A. oryzae</i> NSAR1 | Host for gene expression, a quadruple auxotrophic mutant strain ( <i>niaD</i> <sup>-</sup> , <i>sC</i> <sup>-</sup> , <i>ΔargB</i> , <i>adeA</i> <sup>-</sup> ) | Jin, et al. <sup>8</sup> |
| AOS0                   | <i>A. oryzae</i> NSAR1 transformant harboring <i>helA</i> , <i>helB1</i> , <i>helC</i> , <i>helB2</i> , <i>helD2</i> and <i>helB4</i>                           | Lv, et al. <sup>5</sup>  |
| AOS1                   | Transformant with addition of <i>helE</i> and <i>fusB1</i> into AOS0                                                                                            | This work                |
| AOS2                   | Transformant with addition of <i>helE</i> and <i>fusC1</i> into AOS0                                                                                            | This work                |
| AOS3                   | Transformant with addition of <i>helE</i> and <i>cepB4</i> into AOS0                                                                                            | This work                |
| AOS4                   | Transformant with addition of <i>fusB1</i> and <i>cepB4</i> into AOS0                                                                                           | This work                |
| AOS5                   | Transformant with addition of <i>helB3</i> and <i>fusB1</i> into AOS0                                                                                           | This work                |
| AOS6                   | Transformant with addition of <i>helB3</i> and <i>fusC1</i> into AOS0                                                                                           | This work                |
| AOS7                   | Transformant with addition of <i>helE</i> , <i>fusB1</i> and <i>helB3</i> into AOS0                                                                             | This work                |
| AOS8                   | Transformant with addition of <i>helE</i> , <i>fusB1</i> and <i>fusC1</i> into AOS0                                                                             | This work                |
| AOS9                   | Transformant with addition of <i>helE</i> , <i>fusC1</i> and <i>helB3</i> into AOS0                                                                             | This work                |
| AOS10                  | Transformant with addition of <i>helE</i> , <i>cepB4</i> and <i>fusB1</i> into AOS0                                                                             | This work                |
| AOS11                  | Transformant with addition of <i>helE</i> , <i>cepB4</i> and <i>fusC1</i> into AOS0                                                                             | This work                |
| AOS12                  | Transformant with addition of <i>helE</i> , <i>cepB4</i> and <i>cepD2</i> into AOS0                                                                             | This work                |
| AOS13                  | Transformant with addition of <i>fusB1</i> , <i>cepB4</i> and <i>fusC1</i> into AOS0                                                                            | This work                |
| AOS14                  | Transformant with addition of <i>fusB1</i> , <i>cepB4</i> and <i>cepD2</i> into AOS0                                                                            | This work                |
| AOS15                  | Transformant with addition of <i>fusB1</i> , <i>helB3</i> and <i>fusC1</i> into AOS0                                                                            | This work                |
| AOS16                  | Transformant with addition of <i>fusB1</i> , <i>helB3</i> and <i>helD1</i> into AOS0                                                                            | This work                |
| AOS17                  | Transformant with addition of <i>helB3</i> , <i>fusC1</i> and <i>helD1</i> into AOS0                                                                            | This work                |
| AOS18                  | Transformant with addition of <i>helE</i> , <i>fusB1</i> , <i>helB3</i> and <i>helD1</i> into AOS0                                                              | This work                |
| AOS19                  | Transformant with addition of <i>helE</i> , <i>fusB1</i> , <i>helB3</i> and <i>fusC1</i> into AOS0                                                              | This work                |
| AOS20                  | Transformant with addition of <i>helE</i> , <i>fusC1</i> , <i>helB3</i> and <i>helD1</i> into AOS0                                                              | This work                |
| AOS21                  | Transformant with addition of <i>helE</i> , <i>fusB1</i> , <i>cepB4</i> and <i>cepC2</i> into AOS0                                                              | This work                |
| AOS22                  | Transformant with addition of <i>helE</i> , <i>fusB1</i> , <i>cepB4</i> and <i>cepD2</i> into AOS0                                                              | This work                |
| AOS23                  | Transformant with addition of <i>helE</i> , <i>fusC1</i> , <i>cepB4</i> and <i>cepD2</i> into AOS0                                                              | This work                |
| AOS24                  | Transformant with addition of <i>fusB1</i> , <i>cepB4</i> , <i>fusC1</i> and <i>cepD2</i> into AOS0                                                             | This work                |
| AOS25                  | Transformant with addition of <i>fusB1</i> , <i>fusC1</i> , <i>helB3</i> and <i>helD1</i> into AOS0                                                             | This work                |
| AOS26                  | Transformant with addition of <i>helE</i> , <i>fusB1</i> , <i>fusC1</i> , <i>helB3</i> and <i>helD1</i> into AOS0                                               | This work                |
| AOS27                  | Transformant with addition of <i>helE</i> , <i>fusB1</i> , <i>fusC1</i> , <i>cepB4</i> and <i>cepD2</i> into AOS0                                               | This work                |
| AOS28                  | <i>A. oryzae</i> NSAR1 transformant harboring <i>helB3</i>                                                                                                      | This work                |
| COS6                   | <i>A. oryzae</i> NSAR1 transformant harboring <i>cepB4</i>                                                                                                      | Cao, et al. <sup>7</sup> |
| COS7                   | <i>A. oryzae</i> NSAR1 transformant harboring <i>cepD2</i>                                                                                                      |                          |

## References

1. F.L.P. Costa, A.C.F. De Albuquerque, F.M. dos Santos Jr, M.B. de Amorim. GIAO-HDFT scaling factor for  $^{13}\text{C}$  NMR chemical shifts calculation. *J Phys Org Chem* **23**,2010,972–977.
2. N. Grimblat, M.M. Zanardi, A.M. Sarotti. Beyond DP4: An improved probability for the stereochemical assignment of isomeric compounds using quantum chemical calculations of NMR shifts. *J Org Chem* **80**,2015,12526–12534.
3. T. Fujii, H. Yamaoka, K. Gomi, K. Kitamoto, C. Kumagai. Cloning and nucleotide sequence of the ribonuclease T1 gene (*rntA*) from *Aspergillus oryzae* and its expression in *Saccharomyces cerevisiae* and *Aspergillus oryzae*. *Biosci Biotechnol Biochem* **59**,1995,1869–1874.
4. Y. Matsuda, T. Wakimoto, T. Mori, T. Awakawa, I. Abe. Complete biosynthetic pathway of anditomin: Nature's sophisticated synthetic route to a complex fungal meroterpenoid. *J Am Chem Soc* **136**,2014,15326–15336.
5. J.M. Lv, D. Hu, H. Gao, T. Kushiro, T. Awakawa, G.D. Chen, et al. Biosynthesis of helvolic acid and identification of an unusual C-4-demethylation process distinct from sterol biosynthesis. *Nat Commun* **8**,2017,1644.
6. Z.Q. Cao, S.Y. Li, J.M. Lv, H. Gao, G.D. Chen, T. Awakawa, et al. Biosynthesis of clinically used antibiotic fusidic acid and identification of two short-chain dehydrogenase/reductases with converse stereoselectivity. *Acta Pharm Sin B* **9**,2018,433–442.
7. Z.Q. Cao, J.M. Lv, Q. Liu, S.Y. Qin, G.D. Chen, P. Dai, et al. Biosynthetic study of cephalosporin P<sub>1</sub> reveals a multifunctional P450 enzyme and a site-selective acetyltransferase. *ACS Chem Biol* **15**,2020,44–51.
8. F.J. Jin, J. Maruyama, P.R. Juvvadi, M. Arioka, K. Kitamoto. Development of a novel quadruple auxotrophic host transformation system by *argB* gene disruption using *adeA* gene and exploiting adenine auxotrophy in *Aspergillus oryzae*. *FEMS Microbiol Lett* **239**,2004,79–85.
